# Supplementary material for: Diversion of Arginine’s dietary metabolic fate in proteinuric kidney disease
Source: Research Square preprint supplement (doi:10.21203/rs.3.rs-9927381/v1), 2026-06-17
Supplement: Supplementary file 1 [file 043f1f176ac26c64f71b39fa.xlsx]

## Sheet: Sheet1
category	ncbiTaxonId	Organ	Expression	term	description	number_of_genes	number_of_genes_in_background	inputGenes	preferredNames	p_value	fdr
KEGG	10090	Brain	Upregulated	mmu03040	Spliceosome	37	131	10090.ENSMUSP00000004200,10090.ENSMUSP00000015892,10090.ENSMUSP00000019803,10090.ENSMUSP00000021428,10090.ENSMUSP00000023117,10090.ENSMUSP00000024727,10090.ENSMUSP00000025137,10090.ENSMUSP00000025774,10090.ENSMUSP00000026125,10090.ENSMUSP00000029178,10090.ENSMUSP00000034311,10090.ENSMUSP00000037597,10090.ENSMUSP00000039406,10090.ENSMUSP00000041831,10090.ENSMUSP00000047571,10090.ENSMUSP00000048153…	Cwc15,Prpf3,Ccdc12,Snw1,Phf5a,Cdc5l,Thoc1,Sf3b2,Alyref,Ctnnbl1,Lsm4,Snrpd2,U2af1l4,Rbm17,Hnrnpu,Rbmxl1,Srsf7,Snrnp70,Sf3b4,U2surp,Alyref2,Prpf4,Srsf2,Sf3b5,Srsf10,Fus,Srsf5,Hnrnpa3,Rbmx,Pqbp1,Wbp11,Plrg1,Snrpa1,Hnrnpm,Srsf1,Tra2b,Lsm5	6.21e-27	2.06e-24
KEGG	10090	Brain	Upregulated	mmu03022	Basal transcription factors	7	43	10090.ENSMUSP00000021523,10090.ENSMUSP00000029938,10090.ENSMUSP00000049625,10090.ENSMUSP00000098217,10090.ENSMUSP00000109123,10090.ENSMUSP00000114765,10090.ENSMUSP00000132287	Mnat1,Gtf2b,Gtf2i,Gtf2ird1,Taf9b,Taf1,Gtf2e2	8.69e-05	0.0144
KEGG	10090	Brain	Upregulated	mmu03015	mRNA surveillance pathway	9	94	10090.ENSMUSP00000021381,10090.ENSMUSP00000022808,10090.ENSMUSP00000023882,10090.ENSMUSP00000026125,10090.ENSMUSP00000038958,10090.ENSMUSP00000080242,10090.ENSMUSP00000081142,10090.ENSMUSP00000101858,10090.ENSMUSP00000109164	Pnn,Pabpn1,Sympk,Alyref,Cpsf7,Alyref2,Tardbp,Fus,Fip1l1	0.00036	0.04
KEGG	10090	Brain	Downregulated	mmu04723	Retrograde endocannabinoid signaling	10	144	10090.ENSMUSP00000031122,10090.ENSMUSP00000035065,10090.ENSMUSP00000042705,10090.ENSMUSP00000049584,10090.ENSMUSP00000060110,10090.ENSMUSP00000075953,10090.ENSMUSP00000086204,10090.ENSMUSP00000093978,10090.ENSMUSP00000097061,10090.ENSMUSP00000110872	Gabrb1,Ptgs2,Gng10,Itpr2,Kcnj9,Ndufa3,Mapk11,Gng3,Gng7,Napepld	8.31e-06	0.0023
KEGG	10090	Brain	Downregulated	mmu04725	Cholinergic synapse	9	110	10090.ENSMUSP00000035037,10090.ENSMUSP00000042705,10090.ENSMUSP00000049584,10090.ENSMUSP00000093978,10090.ENSMUSP00000097061,10090.ENSMUSP00000097185,10090.ENSMUSP00000106789,10090.ENSMUSP00000122915,10090.ENSMUSP00000126103	Pik3cb,Gng10,Itpr2,Gng3,Gng7,Chrm5,Akt3,Kcnq2,Chrm1	6.9e-06	0.0023
KEGG	10090	Brain	Downregulated	mmu04932	Non-alcoholic fatty liver disease	9	147	10090.ENSMUSP00000000175,10090.ENSMUSP00000020372,10090.ENSMUSP00000030784,10090.ENSMUSP00000035037,10090.ENSMUSP00000036410,10090.ENSMUSP00000075953,10090.ENSMUSP00000106789,10090.ENSMUSP00000115419,10090.ENSMUSP00000132499	Sdhd,Uqcr11,Prkag2,Pik3cb,Prkab2,Ndufa3,Akt3,Cox7c,Prkag1	5.98e-05	0.0066
KEGG	10090	Brain	Downregulated	mmu04728	Dopaminergic synapse	8	127	10090.ENSMUSP00000042705,10090.ENSMUSP00000049584,10090.ENSMUSP00000060110,10090.ENSMUSP00000082053,10090.ENSMUSP00000086204,10090.ENSMUSP00000093978,10090.ENSMUSP00000097061,10090.ENSMUSP00000106789	Gng10,Itpr2,Kcnj9,Ppp2r5c,Mapk11,Gng3,Gng7,Akt3	0.00013	0.0106
KEGG	10090	Brain	Downregulated	mmu04371	Apelin signaling pathway	8	133	10090.ENSMUSP00000030784,10090.ENSMUSP00000036410,10090.ENSMUSP00000042705,10090.ENSMUSP00000049584,10090.ENSMUSP00000093978,10090.ENSMUSP00000097061,10090.ENSMUSP00000106789,10090.ENSMUSP00000132499	Prkag2,Prkab2,Gng10,Itpr2,Gng3,Gng7,Akt3,Prkag1	0.00017	0.0115
KEGG	10090	Brain	Downregulated	mmu05170	Human immunodeficiency virus 1 infection	10	224	10090.ENSMUSP00000030285,10090.ENSMUSP00000035037,10090.ENSMUSP00000042705,10090.ENSMUSP00000049584,10090.ENSMUSP00000086204,10090.ENSMUSP00000090844,10090.ENSMUSP00000093978,10090.ENSMUSP00000097061,10090.ENSMUSP00000106789,10090.ENSMUSP00000111393	Calr4,Pik3cb,Gng10,Itpr2,Mapk11,Ap1g1,Gng3,Gng7,Akt3,Tmem173	0.00028	0.0156
KEGG	10090	Brain	Downregulated	mmu05163	Human cytomegalovirus infection	10	237	10090.ENSMUSP00000030285,10090.ENSMUSP00000035037,10090.ENSMUSP00000035065,10090.ENSMUSP00000042705,10090.ENSMUSP00000049584,10090.ENSMUSP00000086204,10090.ENSMUSP00000093978,10090.ENSMUSP00000097061,10090.ENSMUSP00000106789,10090.ENSMUSP00000111393	Calr4,Pik3cb,Ptgs2,Gng10,Itpr2,Mapk11,Gng3,Gng7,Akt3,Tmem173	0.00043	0.0205
KEGG	10090	Brain	Downregulated	mmu04068	FoxO signaling pathway	7	129	10090.ENSMUSP00000030784,10090.ENSMUSP00000035037,10090.ENSMUSP00000036410,10090.ENSMUSP00000086204,10090.ENSMUSP00000103474,10090.ENSMUSP00000106789,10090.ENSMUSP00000132499	Prkag2,Pik3cb,Prkab2,Mapk11,Prmt1,Akt3,Prkag1	0.00079	0.0299
KEGG	10090	Brain	Downregulated	mmu04213	Longevity regulating pathway - multiple species	5	62	10090.ENSMUSP00000030784,10090.ENSMUSP00000035037,10090.ENSMUSP00000036410,10090.ENSMUSP00000106789,10090.ENSMUSP00000132499	Prkag2,Pik3cb,Prkab2,Akt3,Prkag1	0.00086	0.0299
KEGG	10090	Brain	Downregulated	mmu04726	Serotonergic synapse	7	127	10090.ENSMUSP00000031122,10090.ENSMUSP00000035065,10090.ENSMUSP00000042705,10090.ENSMUSP00000049584,10090.ENSMUSP00000060110,10090.ENSMUSP00000093978,10090.ENSMUSP00000097061	Gabrb1,Ptgs2,Gng10,Itpr2,Kcnj9,Gng3,Gng7	0.00072	0.0299
KEGG	10090	Brain	Downregulated	mmu04922	Glucagon signaling pathway	6	99	10090.ENSMUSP00000030784,10090.ENSMUSP00000036410,10090.ENSMUSP00000049584,10090.ENSMUSP00000103474,10090.ENSMUSP00000106789,10090.ENSMUSP00000132499	Prkag2,Prkab2,Itpr2,Prmt1,Akt3,Prkag1	0.0011	0.0327
KEGG	10090	Brain	Downregulated	mmu04014	Ras signaling pathway	9	225	10090.ENSMUSP00000020617,10090.ENSMUSP00000035037,10090.ENSMUSP00000042705,10090.ENSMUSP00000071289,10090.ENSMUSP00000093978,10090.ENSMUSP00000097061,10090.ENSMUSP00000105313,10090.ENSMUSP00000106789,10090.ENSMUSP00000133064	Flt4,Pik3cb,Gng10,Nf1,Gng3,Gng7,Rapgef5,Akt3,Fgfr3	0.0012	0.0329
KEGG	10090	Brain	Downregulated	mmu04714	Thermogenesis	9	225	10090.ENSMUSP00000000175,10090.ENSMUSP00000020372,10090.ENSMUSP00000030784,10090.ENSMUSP00000036410,10090.ENSMUSP00000075953,10090.ENSMUSP00000080995,10090.ENSMUSP00000086204,10090.ENSMUSP00000115419,10090.ENSMUSP00000132499	Sdhd,Uqcr11,Prkag2,Prkab2,Ndufa3,mt-Atp8,Mapk11,Cox7c,Prkag1	0.0012	0.0329
KEGG	10090	Brain	Downregulated	mmu05230	Central carbon metabolism in cancer	5	69	10090.ENSMUSP00000020277,10090.ENSMUSP00000032201,10090.ENSMUSP00000035037,10090.ENSMUSP00000106789,10090.ENSMUSP00000133064	Hkdc1,Ret,Pik3cb,Akt3,Fgfr3	0.0013	0.0329
KEGG	10090	Colon	Downregulated	mmu04610	Complement and coagulation cascades	16	91	10090.ENSMUSP00000014578,10090.ENSMUSP00000017488,10090.ENSMUSP00000021948,10090.ENSMUSP00000022616,10090.ENSMUSP00000023450,10090.ENSMUSP00000023589,10090.ENSMUSP00000025230,10090.ENSMUSP00000028681,10090.ENSMUSP00000029771,10090.ENSMUSP00000033821,10090.ENSMUSP00000048704,10090.ENSMUSP00000068971,10090.ENSMUSP00000072652,10090.ENSMUSP00000077909,10090.ENSMUSP00000106317,10090.ENSMUSP00000139941	Plg,Vtn,F12,Clu,Serpind1,Kng1,C2,F2,F3,F10,Serpinf2,Serpinc1,Serpina1a,Serpina1d,C7,Serpina1b	2.01e-14	6.66e-12
KEGG	10090	Kid. Cortex	Upregulated	mmu04610	Complement and coagulation cascades	48	91	10090.ENSMUSP00000000299,10090.ENSMUSP00000014578,10090.ENSMUSP00000017488,10090.ENSMUSP00000021948,10090.ENSMUSP00000022368,10090.ENSMUSP00000022576,10090.ENSMUSP00000022616,10090.ENSMUSP00000022749,10090.ENSMUSP00000023450,10090.ENSMUSP00000023589,10090.ENSMUSP00000023994,10090.ENSMUSP00000025797,10090.ENSMUSP00000027657,10090.ENSMUSP00000028233,10090.ENSMUSP00000028681,10090.ENSMUSP00000029771…	Itgb2,Plg,Vtn,F12,Plau,Cpb2,Clu,C9,Serpind1,Kng1,Serping1,Mbl2,C4bp,Hc,F2,F3,C8b,Itgax,F7,F10,Plat,C1qc,Fgb,Serpine1,C1qb,C8g,F13a1,Serpinf2,C1qa,Masp2,Cfd,C8a,Itgam,Serpinc1,C4b,Serpina1a,Serpina1d,Thbd,Kng2,Cfh,Vwf,Serpina1e,C5ar1,Fga,C1rb,Serpina1b,Fgg,Mbl1	9.86e-31	3.27e-28
KEGG	10090	Kid. Cortex	Upregulated	mmu03030	DNA replication	16	35	10090.ENSMUSP00000000505,10090.ENSMUSP00000006856,10090.ENSMUSP00000012627,10090.ENSMUSP00000023353,10090.ENSMUSP00000023598,10090.ENSMUSP00000027601,10090.ENSMUSP00000028817,10090.ENSMUSP00000032969,10090.ENSMUSP00000039776,10090.ENSMUSP00000059192,10090.ENSMUSP00000061923,10090.ENSMUSP00000099621,10090.ENSMUSP00000099986,10090.ENSMUSP00000117246,10090.ENSMUSP00000126135,10090.ENSMUSP00000136972	Mcm7,Pola1,Rpa3,Mcm4,Rfc4,Mcm6,Pcna,Pold3,Pold1,Mcm3,Mcm2,Rpa2,Pold2,Fen1,Mcm5,Lig1	2.01e-10	3.33e-08
KEGG	10090	Kid. Cortex	Upregulated	mmu04145	Phagosome	31	162	10090.ENSMUSP00000000299,10090.ENSMUSP00000001513,10090.ENSMUSP00000001566,10090.ENSMUSP00000015484,10090.ENSMUSP00000015667,10090.ENSMUSP00000016094,10090.ENSMUSP00000020779,10090.ENSMUSP00000021639,10090.ENSMUSP00000023128,10090.ENSMUSP00000025181,10090.ENSMUSP00000025197,10090.ENSMUSP00000025797,10090.ENSMUSP00000028045,10090.ENSMUSP00000037088,10090.ENSMUSP00000041008,10090.ENSMUSP00000044903…	Itgb2,Tubb6,Tubb5,Cybb,Ctss,Ncf1,Mpo,Tubal3,Itga5,H2-K1,Tap2,Mbl2,Mrc1,H2-DMa,H2-Ab1,Thbs1,H2-Aa,Cd14,Itgam,Scarb1,Mrc2,Coro1a,Tcirg1,Tap1,H2-Q10,H2-D1,C1rb,Ncf2,Mbl1,Colec12,H2-Eb1	2.16e-10	3.33e-08
KEGG	10090	Kid. Cortex	Upregulated	mmu05150	Staphylococcus aureus infection	24	108	10090.ENSMUSP00000000299,10090.ENSMUSP00000007317,10090.ENSMUSP00000014578,10090.ENSMUSP00000017743,10090.ENSMUSP00000023803,10090.ENSMUSP00000025797,10090.ENSMUSP00000028233,10090.ENSMUSP00000036747,10090.ENSMUSP00000037088,10090.ENSMUSP00000040246,10090.ENSMUSP00000041008,10090.ENSMUSP00000046105,10090.ENSMUSP00000048836,10090.ENSMUSP00000049729,10090.ENSMUSP00000056836,10090.ENSMUSP00000068468…	Itgb2,Krt19,Plg,Krt20,Krt18,Mbl2,Hc,C1qc,H2-DMa,C1qb,H2-Ab1,H2-Aa,C1qa,Masp2,Cfd,Itgam,C4b,Icam1,Cfh,C5ar1,C1rb,Fgg,Mbl1,H2-Eb1	1.84e-09	1.53e-07
KEGG	10090	Kid. Cortex	Upregulated	mmu04810	Regulation of actin cytoskeleton	33	211	10090.ENSMUSP00000000299,10090.ENSMUSP00000002640,10090.ENSMUSP00000005611,10090.ENSMUSP00000005889,10090.ENSMUSP00000006912,10090.ENSMUSP00000013886,10090.ENSMUSP00000016771,10090.ENSMUSP00000021554,10090.ENSMUSP00000023128,10090.ENSMUSP00000023538,10090.ENSMUSP00000023589,10090.ENSMUSP00000025522,10090.ENSMUSP00000028106,10090.ENSMUSP00000028681,10090.ENSMUSP00000033053,10090.ENSMUSP00000033468…	Itgb2,Scin,Myl10,Vav1,Pip4k2a,Ppp1r12c,Myh9,Actn1,Itga5,Mylk,Kng1,Pdgfrb,Itga8,F2,Itgax,Arhgef6,Nckap1l,Vav3,Rac2,Rras,Fn1,Itgam,Arpc1b,Myl9,Kng2,Itga4,Pik3cd,Myl12a,Pdgfra,Itgb4,Fgf2,Cfl1,Myh11	5.33e-09	3.54e-07
KEGG	10090	Kid. Cortex	Upregulated	mmu05132	Salmonella infection	33	212	10090.ENSMUSP00000005611,10090.ENSMUSP00000009157,10090.ENSMUSP00000014922,10090.ENSMUSP00000022830,10090.ENSMUSP00000023238,10090.ENSMUSP00000027015,10090.ENSMUSP00000029812,10090.ENSMUSP00000034756,10090.ENSMUSP00000035092,10090.ENSMUSP00000035400,10090.ENSMUSP00000036949,10090.ENSMUSP00000042150,10090.ENSMUSP00000042698,10090.ENSMUSP00000055521,10090.ENSMUSP00000056669,10090.ENSMUSP00000059498…	Myl10,Dynll1,Fhod1,Ripk3,Gsdmd,Casp1,Nfkb1,Anxa2,Myd88,Nckap1l,S100a10,Rras,Cyth4,Mlkl,Cd14,Rhoj,Snx33,Flnc,Rhob,Elmo1,Irak4,Klc1,Arpc1b,Myl9,Mapk11,Ahnak,Pik3cd,Rhog,Traf2,Flna,Ahnak2,Myl12a,Ptprc	5.92e-09	3.54e-07
KEGG	10090	Kid. Cortex	Upregulated	mmu04510	Focal adhesion	30	196	10090.ENSMUSP00000005611,10090.ENSMUSP00000005889,10090.ENSMUSP00000007799,10090.ENSMUSP00000013886,10090.ENSMUSP00000017488,10090.ENSMUSP00000021554,10090.ENSMUSP00000023128,10090.ENSMUSP00000023538,10090.ENSMUSP00000025522,10090.ENSMUSP00000027753,10090.ENSMUSP00000028106,10090.ENSMUSP00000032561,10090.ENSMUSP00000036270,10090.ENSMUSP00000036384,10090.ENSMUSP00000044903,10090.ENSMUSP00000054499…	Myl10,Vav1,Cav1,Ppp1r12c,Vtn,Actn1,Itga5,Mylk,Pdgfrb,Lamc2,Itga8,Vasp,Vav3,Rac2,Thbs1,Fn1,Flnc,Spp1,Myl9,Lama3,Itga4,Pik3cd,Tnc,Vwf,Flna,Myl12a,Ccnd3,Zyx,Pdgfra,Itgb4	4.03e-08	1.91e-06
KEGG	10090	Kid. Cortex	Upregulated	mmu05133	Pertussis	18	73	10090.ENSMUSP00000000299,10090.ENSMUSP00000023128,10090.ENSMUSP00000023994,10090.ENSMUSP00000027015,10090.ENSMUSP00000027657,10090.ENSMUSP00000028233,10090.ENSMUSP00000029812,10090.ENSMUSP00000035092,10090.ENSMUSP00000036747,10090.ENSMUSP00000040246,10090.ENSMUSP00000048836,10090.ENSMUSP00000056669,10090.ENSMUSP00000068468,10090.ENSMUSP00000069418,10090.ENSMUSP00000074471,10090.ENSMUSP00000086204…	Itgb2,Itga5,Serping1,Casp1,C4bp,Hc,Nfkb1,Myd88,C1qc,C1qb,C1qa,Cd14,Itgam,C4b,Irak4,Mapk11,C1rb,Cfl1	5.01e-08	2.08e-06
KEGG	10090	Kid. Cortex	Upregulated	mmu04611	Platelet activation	22	120	10090.ENSMUSP00000003017,10090.ENSMUSP00000014290,10090.ENSMUSP00000023538,10090.ENSMUSP00000028681,10090.ENSMUSP00000029635,10090.ENSMUSP00000032561,10090.ENSMUSP00000037858,10090.ENSMUSP00000038150,10090.ENSMUSP00000039472,10090.ENSMUSP00000070868,10090.ENSMUSP00000073268,10090.ENSMUSP00000078875,10090.ENSMUSP00000086204,10090.ENSMUSP00000099583,10090.ENSMUSP00000101315,10090.ENSMUSP00000107873…	Tbxas1,Apbb1ip,Mylk,F2,Gucy1b1,Vasp,Fermt3,Itpr3,Fgb,Pla2g4a,Prkg1,Fcer1g,Mapk11,Plcb2,Pik3cd,Vwf,Gucy1a2,Syk,Myl12a,Fga,Fgg,Gucy1a1	1.71e-07	6.32e-06
KEGG	10090	Kid. Cortex	Upregulated	mmu05169	Epstein-Barr virus infection	30	214	10090.ENSMUSP00000005218,10090.ENSMUSP00000020157,10090.ENSMUSP00000024884,10090.ENSMUSP00000025161,10090.ENSMUSP00000025181,10090.ENSMUSP00000025197,10090.ENSMUSP00000028062,10090.ENSMUSP00000029812,10090.ENSMUSP00000035092,10090.ENSMUSP00000037088,10090.ENSMUSP00000041008,10090.ENSMUSP00000046105,10090.ENSMUSP00000074471,10090.ENSMUSP00000079198,10090.ENSMUSP00000082548,10090.ENSMUSP00000082855…	Cd44,Apaf1,Eif2ak2,Tapbp,H2-K1,Tap2,Vim,Nfkb1,Myd88,H2-DMa,H2-Ab1,H2-Aa,Irak4,Oas1a,Isg15,Stat2,Icam1,Mapk11,Pik3cd,Nfkb2,Traf2,Syk,Entpd1,Stat3,Ccnd3,Tap1,H2-Q10,H2-D1,Stat1,H2-Eb1	2.24e-07	7.45e-06
KEGG	10090	Kid. Cortex	Upregulated	mmu04670	Leukocyte transendothelial migration	21	113	10090.ENSMUSP00000000299,10090.ENSMUSP00000005611,10090.ENSMUSP00000005889,10090.ENSMUSP00000015484,10090.ENSMUSP00000016094,10090.ENSMUSP00000021554,10090.ENSMUSP00000029574,10090.ENSMUSP00000032561,10090.ENSMUSP00000034187,10090.ENSMUSP00000036270,10090.ENSMUSP00000036384,10090.ENSMUSP00000068468,10090.ENSMUSP00000073618,10090.ENSMUSP00000083587,10090.ENSMUSP00000085913,10090.ENSMUSP00000086204…	Itgb2,Myl10,Vav1,Cybb,Ncf1,Actn1,Vcam1,Vasp,Mmp2,Vav3,Rac2,Itgam,Sipa1,Icam1,Myl9,Mapk11,Itga4,Pik3cd,Thy1,Myl12a,Ncf2	2.66e-07	7.96e-06
KEGG	10090	Kid. Cortex	Upregulated	mmu05152	Tuberculosis	26	168	10090.ENSMUSP00000000299,10090.ENSMUSP00000015667,10090.ENSMUSP00000020157,10090.ENSMUSP00000028045,10090.ENSMUSP00000029812,10090.ENSMUSP00000033053,10090.ENSMUSP00000035092,10090.ENSMUSP00000037088,10090.ENSMUSP00000041008,10090.ENSMUSP00000046105,10090.ENSMUSP00000056669,10090.ENSMUSP00000068468,10090.ENSMUSP00000074471,10090.ENSMUSP00000078875,10090.ENSMUSP00000086204,10090.ENSMUSP00000095171…	Itgb2,Ctss,Apaf1,Mrc1,Nfkb1,Itgax,Myd88,H2-DMa,H2-Ab1,H2-Aa,Cd14,Itgam,Irak4,Fcer1g,Mapk11,Cd74,Mrc2,Ppp3r1,Lsp1,Coro1a,Syk,Tcirg1,Cyp27b1,Sphk1,Stat1,H2-Eb1	2.64e-07	7.96e-06
KEGG	10090	Kid. Cortex	Upregulated	mmu05140	Leishmaniasis	16	66	10090.ENSMUSP00000000299,10090.ENSMUSP00000015484,10090.ENSMUSP00000016094,10090.ENSMUSP00000029812,10090.ENSMUSP00000035092,10090.ENSMUSP00000037088,10090.ENSMUSP00000041008,10090.ENSMUSP00000046105,10090.ENSMUSP00000055637,10090.ENSMUSP00000068468,10090.ENSMUSP00000074471,10090.ENSMUSP00000086204,10090.ENSMUSP00000099718,10090.ENSMUSP00000140404,10090.ENSMUSP00000141132,10090.ENSMUSP00000158533	Itgb2,Cybb,Ncf1,Nfkb1,Myd88,H2-DMa,H2-Ab1,H2-Aa,Marcksl1,Itgam,Irak4,Mapk11,Itga4,Ncf2,Stat1,H2-Eb1	3.35e-07	8.56e-06
KEGG	10090	Kid. Cortex	Upregulated	mmu04666	Fc gamma R-mediated phagocytosis	17	85	10090.ENSMUSP00000002640,10090.ENSMUSP00000005889,10090.ENSMUSP00000016094,10090.ENSMUSP00000032561,10090.ENSMUSP00000033505,10090.ENSMUSP00000036270,10090.ENSMUSP00000036384,10090.ENSMUSP00000055637,10090.ENSMUSP00000070868,10090.ENSMUSP00000082822,10090.ENSMUSP00000090245,10090.ENSMUSP00000101315,10090.ENSMUSP00000113852,10090.ENSMUSP00000127941,10090.ENSMUSP00000131010,10090.ENSMUSP00000138350…	Scin,Vav1,Ncf1,Vasp,Was,Vav3,Rac2,Marcksl1,Pla2g4a,Arpc1b,Marcks,Pik3cd,Syk,Inpp5d,Sphk1,Ptprc,Cfl1	1.5e-06	3.56e-05
KEGG	10090	Kid. Cortex	Upregulated	mmu05146	Amoebiasis	18	102	10090.ENSMUSP00000000299,10090.ENSMUSP00000005077,10090.ENSMUSP00000017188,10090.ENSMUSP00000021554,10090.ENSMUSP00000022749,10090.ENSMUSP00000027753,10090.ENSMUSP00000029812,10090.ENSMUSP00000031663,10090.ENSMUSP00000041855,10090.ENSMUSP00000054499,10090.ENSMUSP00000056669,10090.ENSMUSP00000067541,10090.ENSMUSP00000068468,10090.ENSMUSP00000089703,10090.ENSMUSP00000099002,10090.ENSMUSP00000099583…	Itgb2,Hspb1,Serpinb6a,Actn1,C9,Lamc2,Nfkb1,C8b,C8g,Fn1,Cd14,C8a,Itgam,Lama3,Serpinb9,Plcb2,Pik3cd,Serpinb6b	3.57e-06	7.91e-05
KEGG	10090	Kid. Cortex	Upregulated	mmu04933	AGE-RAGE signaling pathway in diabetic complications	17	99	10090.ENSMUSP00000015484,10090.ENSMUSP00000029574,10090.ENSMUSP00000029771,10090.ENSMUSP00000029812,10090.ENSMUSP00000034187,10090.ENSMUSP00000034973,10090.ENSMUSP00000039586,10090.ENSMUSP00000054499,10090.ENSMUSP00000066488,10090.ENSMUSP00000083587,10090.ENSMUSP00000086204,10090.ENSMUSP00000096877,10090.ENSMUSP00000099583,10090.ENSMUSP00000101315,10090.ENSMUSP00000120152,10090.ENSMUSP00000130115…	Cybb,Vcam1,F3,Nfkb1,Mmp2,Smad3,Serpine1,Fn1,Agt,Icam1,Mapk11,Thbd,Plcb2,Pik3cd,Stat3,Smad2,Stat1	9.1e-06	0.00019
KEGG	10090	Kid. Cortex	Upregulated	mmu05135	Yersinia infection	19	122	10090.ENSMUSP00000005889,10090.ENSMUSP00000023128,10090.ENSMUSP00000027015,10090.ENSMUSP00000029812,10090.ENSMUSP00000033505,10090.ENSMUSP00000035092,10090.ENSMUSP00000036270,10090.ENSMUSP00000036384,10090.ENSMUSP00000054499,10090.ENSMUSP00000072334,10090.ENSMUSP00000074198,10090.ENSMUSP00000074471,10090.ENSMUSP00000086204,10090.ENSMUSP00000092268,10090.ENSMUSP00000099718,10090.ENSMUSP00000101315…	Vav1,Itga5,Casp1,Nfkb1,Was,Myd88,Vav3,Rac2,Fn1,Elmo1,Nfatc2,Irak4,Mapk11,Wipf1,Itga4,Pik3cd,Rhog,Traf2,Lck	9.66e-06	0.00019
KEGG	10090	Kid. Cortex	Upregulated	mmu05322	Systemic lupus erythematosus	16	93	10090.ENSMUSP00000021554,10090.ENSMUSP00000022749,10090.ENSMUSP00000028233,10090.ENSMUSP00000031663,10090.ENSMUSP00000033264,10090.ENSMUSP00000036747,10090.ENSMUSP00000037088,10090.ENSMUSP00000040246,10090.ENSMUSP00000041008,10090.ENSMUSP00000041855,10090.ENSMUSP00000046105,10090.ENSMUSP00000048836,10090.ENSMUSP00000067541,10090.ENSMUSP00000069418,10090.ENSMUSP00000139376,10090.ENSMUSP00000158533	Actn1,C9,Hc,C8b,Trim21,C1qc,H2-DMa,C1qb,H2-Ab1,C8g,H2-Aa,C1qa,C8a,C4b,C1rb,H2-Eb1	1.62e-05	0.0003
KEGG	10090	Kid. Cortex	Upregulated	mmu03430	Mismatch repair	8	22	10090.ENSMUSP00000012627,10090.ENSMUSP00000023598,10090.ENSMUSP00000028817,10090.ENSMUSP00000032969,10090.ENSMUSP00000039776,10090.ENSMUSP00000099621,10090.ENSMUSP00000099986,10090.ENSMUSP00000136972	Rpa3,Rfc4,Pcna,Pold3,Pold1,Rpa2,Pold2,Lig1	2.79e-05	0.00049
KEGG	10090	Kid. Cortex	Upregulated	mmu03410	Base excision repair	9	33	10090.ENSMUSP00000020528,10090.ENSMUSP00000028817,10090.ENSMUSP00000032969,10090.ENSMUSP00000039776,10090.ENSMUSP00000099986,10090.ENSMUSP00000108098,10090.ENSMUSP00000117246,10090.ENSMUSP00000121000,10090.ENSMUSP00000136972	Mpg,Pcna,Pold3,Pold1,Pold2,Parp3,Fen1,Tdg,Lig1	5.85e-05	0.00097
KEGG	10090	Kid. Cortex	Upregulated	mmu03420	Nucleotide excision repair	10	43	10090.ENSMUSP00000001565,10090.ENSMUSP00000012627,10090.ENSMUSP00000023598,10090.ENSMUSP00000028817,10090.ENSMUSP00000032969,10090.ENSMUSP00000039776,10090.ENSMUSP00000099621,10090.ENSMUSP00000099986,10090.ENSMUSP00000103271,10090.ENSMUSP00000136972	Gtf2h4,Rpa3,Rfc4,Pcna,Pold3,Pold1,Rpa2,Pold2,Gtf2h1,Lig1	7.27e-05	0.0011
KEGG	10090	Kid. Cortex	Upregulated	mmu04380	Osteoclast differentiation	17	119	10090.ENSMUSP00000008280,10090.ENSMUSP00000014743,10090.ENSMUSP00000016094,10090.ENSMUSP00000029812,10090.ENSMUSP00000074198,10090.ENSMUSP00000082855,10090.ENSMUSP00000086204,10090.ENSMUSP00000092901,10090.ENSMUSP00000099944,10090.ENSMUSP00000101315,10090.ENSMUSP00000107512,10090.ENSMUSP00000109872,10090.ENSMUSP00000110923,10090.ENSMUSP00000113852,10090.ENSMUSP00000125777,10090.ENSMUSP00000140404…	Fhl2,Csf1,Ncf1,Nfkb1,Nfatc2,Stat2,Mapk11,Jund,Ppp3r1,Pik3cd,Nfkb2,Traf2,Csf1r,Syk,Lck,Ncf2,Stat1	7.37e-05	0.0011
KEGG	10090	Kid. Cortex	Upregulated	mmu04010	MAPK signaling pathway	29	287	10090.ENSMUSP00000005077,10090.ENSMUSP00000014743,10090.ENSMUSP00000025522,10090.ENSMUSP00000025903,10090.ENSMUSP00000029812,10090.ENSMUSP00000030636,10090.ENSMUSP00000035092,10090.ENSMUSP00000036384,10090.ENSMUSP00000042150,10090.ENSMUSP00000049457,10090.ENSMUSP00000056669,10090.ENSMUSP00000064163,10090.ENSMUSP00000070868,10090.ENSMUSP00000074471,10090.ENSMUSP00000086204,10090.ENSMUSP00000088334…	Hspb1,Csf1,Pdgfrb,Rps6ka4,Nfkb1,Stmn1,Myd88,Rac2,Rras,Cacna2d1,Cd14,Flnc,Pla2g4a,Irak4,Mapk11,Map3k20,Jund,Dusp16,Ppp3r1,Arrb2,Map3k1,Nfkb2,Traf2,Flna,Csf1r,Pdgfra,Cacna2d2,Map4k4,Fgf2	0.0001	0.0013
KEGG	10090	Kid. Cortex	Upregulated	mmu04110	Cell cycle	17	121	10090.ENSMUSP00000000505,10090.ENSMUSP00000019109,10090.ENSMUSP00000020099,10090.ENSMUSP00000023353,10090.ENSMUSP00000027198,10090.ENSMUSP00000027601,10090.ENSMUSP00000028098,10090.ENSMUSP00000028817,10090.ENSMUSP00000034973,10090.ENSMUSP00000048319,10090.ENSMUSP00000050374,10090.ENSMUSP00000059192,10090.ENSMUSP00000061923,10090.ENSMUSP00000126135,10090.ENSMUSP00000126141,10090.ENSMUSP00000128828…	Mcm7,Ywhah,Cdk1,Mcm4,Orc2,Mcm6,Orc4,Pcna,Smad3,Orc3,Sfn,Mcm3,Mcm2,Mcm5,Ccnd3,Cdkn1c,Smad2	8.86e-05	0.0013
KEGG	10090	Kid. Cortex	Upregulated	mmu04612	Antigen processing and presentation	13	75	10090.ENSMUSP00000015667,10090.ENSMUSP00000025161,10090.ENSMUSP00000025181,10090.ENSMUSP00000025197,10090.ENSMUSP00000037088,10090.ENSMUSP00000041008,10090.ENSMUSP00000046105,10090.ENSMUSP00000095171,10090.ENSMUSP00000128401,10090.ENSMUSP00000134163,10090.ENSMUSP00000134570,10090.ENSMUSP00000134735,10090.ENSMUSP00000158533	Ctss,Tapbp,H2-K1,Tap2,H2-DMa,H2-Ab1,H2-Aa,Cd74,Tap1,H2-Q10,H2-D1,Psme1,H2-Eb1	9.27e-05	0.0013
KEGG	10090	Kid. Cortex	Upregulated	mmu05206	MicroRNAs in cancer	20	159	10090.ENSMUSP00000004202,10090.ENSMUSP00000005218,10090.ENSMUSP00000020991,10090.ENSMUSP00000022368,10090.ENSMUSP00000023128,10090.ENSMUSP00000024894,10090.ENSMUSP00000025081,10090.ENSMUSP00000025522,10090.ENSMUSP00000028062,10090.ENSMUSP00000029812,10090.ENSMUSP00000030636,10090.ENSMUSP00000044903,10090.ENSMUSP00000090245,10090.ENSMUSP00000101315,10090.ENSMUSP00000103000,10090.ENSMUSP00000109337…	Dnmt1,Cd44,Dnmt3a,Plau,Itga5,Cyp1b1,Zeb1,Pdgfrb,Vim,Nfkb1,Stmn1,Thbs1,Marcks,Pik3cd,Tnc,Tpm1,Stat3,Pdgfra,Ube2i,Zeb2	8.89e-05	0.0013
KEGG	10090	Kid. Cortex	Upregulated	mmu04621	NOD-like receptor signaling pathway	22	193	10090.ENSMUSP00000015484,10090.ENSMUSP00000022830,10090.ENSMUSP00000023238,10090.ENSMUSP00000027009,10090.ENSMUSP00000027015,10090.ENSMUSP00000029812,10090.ENSMUSP00000031281,10090.ENSMUSP00000035092,10090.ENSMUSP00000038150,10090.ENSMUSP00000049104,10090.ENSMUSP00000074471,10090.ENSMUSP00000079198,10090.ENSMUSP00000082855,10090.ENSMUSP00000083385,10090.ENSMUSP00000086204,10090.ENSMUSP00000099583…	Cybb,Ripk3,Gsdmd,Casp12,Casp1,Nfkb1,Antxr2,Myd88,Itpr3,Gbp7,Irak4,Oas1a,Stat2,Rnasel,Mapk11,Plcb2,Gbp3,Ifi204,Traf2,Tmem173,Gbp2,Stat1	0.00015	0.0018
KEGG	10090	Kid. Cortex	Upregulated	mmu05164	Influenza A	20	166	10090.ENSMUSP00000014578,10090.ENSMUSP00000020157,10090.ENSMUSP00000024884,10090.ENSMUSP00000027015,10090.ENSMUSP00000029812,10090.ENSMUSP00000034056,10090.ENSMUSP00000035092,10090.ENSMUSP00000037088,10090.ENSMUSP00000041008,10090.ENSMUSP00000046105,10090.ENSMUSP00000074471,10090.ENSMUSP00000079198,10090.ENSMUSP00000082816,10090.ENSMUSP00000082855,10090.ENSMUSP00000083385,10090.ENSMUSP00000083587…	Plg,Apaf1,Eif2ak2,Casp1,Nfkb1,Tlr3,Myd88,H2-DMa,H2-Ab1,H2-Aa,Irak4,Oas1a,Pml,Stat2,Rnasel,Icam1,Pik3cd,Ccnd3,Stat1,H2-Eb1	0.00015	0.0018
KEGG	10090	Kid. Cortex	Upregulated	mmu05205	Proteoglycans in cancer	22	196	10090.ENSMUSP00000005218,10090.ENSMUSP00000005889,10090.ENSMUSP00000007799,10090.ENSMUSP00000013886,10090.ENSMUSP00000017488,10090.ENSMUSP00000022368,10090.ENSMUSP00000023128,10090.ENSMUSP00000023531,10090.ENSMUSP00000034187,10090.ENSMUSP00000036270,10090.ENSMUSP00000038150,10090.ENSMUSP00000042150,10090.ENSMUSP00000044903,10090.ENSMUSP00000054499,10090.ENSMUSP00000064163,10090.ENSMUSP00000086204…	Cd44,Vav1,Cav1,Ppp1r12c,Vtn,Plau,Itga5,Hcls1,Mmp2,Vav3,Itpr3,Rras,Thbs1,Fn1,Flnc,Mapk11,Pik3cd,Flna,Stat3,Smad2,Fgf2,Cbl	0.00018	0.0021
KEGG	10090	Kid. Cortex	Upregulated	mmu04625	C-type lectin receptor signaling pathway	15	109	10090.ENSMUSP00000027015,10090.ENSMUSP00000029812,10090.ENSMUSP00000038150,10090.ENSMUSP00000042150,10090.ENSMUSP00000074198,10090.ENSMUSP00000078875,10090.ENSMUSP00000082855,10090.ENSMUSP00000086204,10090.ENSMUSP00000099944,10090.ENSMUSP00000101315,10090.ENSMUSP00000101588,10090.ENSMUSP00000107512,10090.ENSMUSP00000110115,10090.ENSMUSP00000113852,10090.ENSMUSP00000141132	Casp1,Nfkb1,Itpr3,Rras,Nfatc2,Fcer1g,Stat2,Mapk11,Ppp3r1,Pik3cd,Lsp1,Nfkb2,Cblb,Syk,Stat1	0.00028	0.0031
KEGG	10090	Kid. Cortex	Upregulated	mmu04512	ECM-receptor interaction	13	86	10090.ENSMUSP00000005218,10090.ENSMUSP00000017488,10090.ENSMUSP00000023128,10090.ENSMUSP00000027753,10090.ENSMUSP00000028106,10090.ENSMUSP00000044903,10090.ENSMUSP00000054499,10090.ENSMUSP00000084043,10090.ENSMUSP00000089703,10090.ENSMUSP00000099718,10090.ENSMUSP00000103000,10090.ENSMUSP00000107873,10090.ENSMUSP00000127604	Cd44,Vtn,Itga5,Lamc2,Itga8,Thbs1,Fn1,Spp1,Lama3,Itga4,Tnc,Vwf,Itgb4	0.00031	0.0033
KEGG	10090	Kid. Cortex	Upregulated	mmu04015	Rap1 signaling pathway	22	208	10090.ENSMUSP00000000299,10090.ENSMUSP00000005889,10090.ENSMUSP00000014290,10090.ENSMUSP00000014743,10090.ENSMUSP00000021689,10090.ENSMUSP00000025522,10090.ENSMUSP00000032561,10090.ENSMUSP00000035662,10090.ENSMUSP00000036270,10090.ENSMUSP00000036384,10090.ENSMUSP00000042150,10090.ENSMUSP00000044903,10090.ENSMUSP00000068468,10090.ENSMUSP00000073618,10090.ENSMUSP00000083273,10090.ENSMUSP00000086204…	Itgb2,Vav1,Apbb1ip,Csf1,Evl,Pdgfrb,Vasp,Arap3,Vav3,Rac2,Rras,Thbs1,Itgam,Sipa1,Prkd2,Mapk11,Plcb2,Pik3cd,Csf1r,Prkd3,Pdgfra,Fgf2	0.00039	0.004
KEGG	10090	Kid. Cortex	Upregulated	mmu04659	Th17 cell differentiation	14	101	10090.ENSMUSP00000029812,10090.ENSMUSP00000034973,10090.ENSMUSP00000037088,10090.ENSMUSP00000041008,10090.ENSMUSP00000046105,10090.ENSMUSP00000074198,10090.ENSMUSP00000086204,10090.ENSMUSP00000099944,10090.ENSMUSP00000120152,10090.ENSMUSP00000125777,10090.ENSMUSP00000130115,10090.ENSMUSP00000138836,10090.ENSMUSP00000141132,10090.ENSMUSP00000158533	Nfkb1,Smad3,H2-DMa,H2-Ab1,H2-Aa,Nfatc2,Mapk11,Ppp3r1,Stat3,Lck,Smad2,Il6st,Stat1,H2-Eb1	0.00041	0.004
KEGG	10090	Kid. Cortex	Upregulated	mmu05203	Viral carcinogenesis	21	194	10090.ENSMUSP00000001565,10090.ENSMUSP00000002640,10090.ENSMUSP00000019109,10090.ENSMUSP00000020099,10090.ENSMUSP00000021554,10090.ENSMUSP00000024884,10090.ENSMUSP00000025181,10090.ENSMUSP00000029812,10090.ENSMUSP00000066399,10090.ENSMUSP00000099928,10090.ENSMUSP00000101315,10090.ENSMUSP00000103271,10090.ENSMUSP00000107512,10090.ENSMUSP00000109872,10090.ENSMUSP00000112110,10090.ENSMUSP00000113852…	Gtf2h4,Scin,Ywhah,Cdk1,Actn1,Eif2ak2,H2-K1,Nfkb1,Sp100,Rel,Pik3cd,Gtf2h1,Nfkb2,Traf2,Hdac7,Syk,Stat3,Ccnd3,H2-Q10,H2-D1,Il6st	0.00039	0.004
KEGG	10090	Kid. Cortex	Upregulated	mmu04540	Gap junction	12	84	10090.ENSMUSP00000001513,10090.ENSMUSP00000001566,10090.ENSMUSP00000020099,10090.ENSMUSP00000021639,10090.ENSMUSP00000025522,10090.ENSMUSP00000029635,10090.ENSMUSP00000038150,10090.ENSMUSP00000073268,10090.ENSMUSP00000099583,10090.ENSMUSP00000111398,10090.ENSMUSP00000127173,10090.ENSMUSP00000142138	Tubb6,Tubb5,Cdk1,Tubal3,Pdgfrb,Gucy1b1,Itpr3,Prkg1,Plcb2,Gucy1a2,Pdgfra,Gucy1a1	0.00082	0.0077
KEGG	10090	Kid. Cortex	Upregulated	mmu04216	Ferroptosis	8	40	10090.ENSMUSP00000015484,10090.ENSMUSP00000027137,10090.ENSMUSP00000035158,10090.ENSMUSP00000066108,10090.ENSMUSP00000092002,10090.ENSMUSP00000103964,10090.ENSMUSP00000108260,10090.ENSMUSP00000158539	Cybb,Slc40a1,Trf,Slc39a14,Ftl1,Cp,Steap3,Fth1	0.00091	0.0084
KEGG	10090	Kid. Cortex	Upregulated	mmu04064	NF-kappa B signaling pathway	13	99	10090.ENSMUSP00000022368,10090.ENSMUSP00000029574,10090.ENSMUSP00000029812,10090.ENSMUSP00000035092,10090.ENSMUSP00000056669,10090.ENSMUSP00000074471,10090.ENSMUSP00000083587,10090.ENSMUSP00000107512,10090.ENSMUSP00000109872,10090.ENSMUSP00000113852,10090.ENSMUSP00000125777,10090.ENSMUSP00000134169,10090.ENSMUSP00000136158	Plau,Vcam1,Nfkb1,Myd88,Cd14,Irak4,Icam1,Nfkb2,Traf2,Syk,Lck,Ube2i,Edaradd	0.001	0.0089
KEGG	10090	Kid. Cortex	Upregulated	mmu05416	Viral myocarditis	11	74	10090.ENSMUSP00000000299,10090.ENSMUSP00000007799,10090.ENSMUSP00000025181,10090.ENSMUSP00000036384,10090.ENSMUSP00000037088,10090.ENSMUSP00000041008,10090.ENSMUSP00000046105,10090.ENSMUSP00000083587,10090.ENSMUSP00000134163,10090.ENSMUSP00000134570,10090.ENSMUSP00000158533	Itgb2,Cav1,H2-K1,Rac2,H2-DMa,H2-Ab1,H2-Aa,Icam1,H2-Q10,H2-D1,H2-Eb1	0.00099	0.0089
KEGG	10090	Kid. Cortex	Upregulated	mmu05142	Chagas disease	13	100	10090.ENSMUSP00000023589,10090.ENSMUSP00000029812,10090.ENSMUSP00000035092,10090.ENSMUSP00000036747,10090.ENSMUSP00000039586,10090.ENSMUSP00000040246,10090.ENSMUSP00000048836,10090.ENSMUSP00000074471,10090.ENSMUSP00000086204,10090.ENSMUSP00000097623,10090.ENSMUSP00000099583,10090.ENSMUSP00000101315,10090.ENSMUSP00000130115	Kng1,Nfkb1,Myd88,C1qc,Serpine1,C1qb,C1qa,Irak4,Mapk11,Kng2,Plcb2,Pik3cd,Smad2	0.0011	0.0094
KEGG	10090	Kid. Cortex	Upregulated	mmu04650	Natural killer cell mediated cytotoxicity	14	114	10090.ENSMUSP00000000299,10090.ENSMUSP00000005889,10090.ENSMUSP00000025181,10090.ENSMUSP00000036270,10090.ENSMUSP00000036384,10090.ENSMUSP00000064241,10090.ENSMUSP00000074198,10090.ENSMUSP00000078875,10090.ENSMUSP00000083587,10090.ENSMUSP00000099944,10090.ENSMUSP00000101315,10090.ENSMUSP00000113852,10090.ENSMUSP00000125777,10090.ENSMUSP00000134570	Itgb2,Vav1,H2-K1,Vav3,Rac2,Cd48,Nfatc2,Fcer1g,Icam1,Ppp3r1,Pik3cd,Syk,Lck,H2-D1	0.0012	0.0099
KEGG	10090	Kid. Cortex	Upregulated	mmu04142	Lysosome	15	128	10090.ENSMUSP00000015667,10090.ENSMUSP00000018918,10090.ENSMUSP00000022721,10090.ENSMUSP00000023088,10090.ENSMUSP00000026262,10090.ENSMUSP00000031377,10090.ENSMUSP00000032779,10090.ENSMUSP00000034377,10090.ENSMUSP00000071577,10090.ENSMUSP00000120531,10090.ENSMUSP00000127646,10090.ENSMUSP00000128446,10090.ENSMUSP00000130660,10090.ENSMUSP00000137476,10090.ENSMUSP00000159121	Ctss,Cd68,Cln5,Naga,Hexa,Scarb2,Ctsc,Pla2g15,Idua,Tcirg1,Arsa,Ap3m2,Gba,Psap,Gla	0.0012	0.0101
KEGG	10090	Kid. Cortex	Upregulated	mmu04514	Cell adhesion molecules	17	157	10090.ENSMUSP00000000299,10090.ENSMUSP00000025181,10090.ENSMUSP00000028106,10090.ENSMUSP00000029574,10090.ENSMUSP00000037088,10090.ENSMUSP00000041008,10090.ENSMUSP00000046105,10090.ENSMUSP00000049534,10090.ENSMUSP00000068468,10090.ENSMUSP00000079613,10090.ENSMUSP00000083587,10090.ENSMUSP00000099718,10090.ENSMUSP00000101032,10090.ENSMUSP00000134163,10090.ENSMUSP00000134570,10090.ENSMUSP00000138350…	Itgb2,H2-K1,Itga8,Vcam1,H2-DMa,H2-Ab1,H2-Aa,Spn,Itgam,Cdh3,Icam1,Itga4,Icosl,H2-Q10,H2-D1,Ptprc,H2-Eb1	0.0014	0.0105
KEGG	10090	Kid. Cortex	Upregulated	mmu04664	Fc epsilon RI signaling pathway	10	65	10090.ENSMUSP00000005889,10090.ENSMUSP00000036270,10090.ENSMUSP00000036384,10090.ENSMUSP00000070868,10090.ENSMUSP00000071130,10090.ENSMUSP00000078875,10090.ENSMUSP00000086204,10090.ENSMUSP00000101315,10090.ENSMUSP00000113852,10090.ENSMUSP00000127941	Vav1,Vav3,Rac2,Pla2g4a,Alox5ap,Fcer1g,Mapk11,Pik3cd,Syk,Inpp5d	0.0013	0.0105
KEGG	10090	Kid. Cortex	Upregulated	mmu04270	Vascular smooth muscle contraction	15	133	10090.ENSMUSP00000013886,10090.ENSMUSP00000016771,10090.ENSMUSP00000023538,10090.ENSMUSP00000029635,10090.ENSMUSP00000038150,10090.ENSMUSP00000048218,10090.ENSMUSP00000066488,10090.ENSMUSP00000070868,10090.ENSMUSP00000073268,10090.ENSMUSP00000085913,10090.ENSMUSP00000099583,10090.ENSMUSP00000110678,10090.ENSMUSP00000111398,10090.ENSMUSP00000142138,10090.ENSMUSP00000155052	Ppp1r12c,Myh9,Mylk,Gucy1b1,Itpr3,Acta2,Agt,Pla2g4a,Prkg1,Myl9,Plcb2,Cald1,Gucy1a2,Gucy1a1,Myh11	0.0018	0.0133
KEGG	10090	Kid. Cortex	Upregulated	mmu05145	Toxoplasmosis	13	106	10090.ENSMUSP00000027753,10090.ENSMUSP00000029812,10090.ENSMUSP00000035092,10090.ENSMUSP00000037088,10090.ENSMUSP00000041008,10090.ENSMUSP00000046105,10090.ENSMUSP00000047356,10090.ENSMUSP00000074471,10090.ENSMUSP00000086204,10090.ENSMUSP00000089703,10090.ENSMUSP00000120152,10090.ENSMUSP00000141132,10090.ENSMUSP00000158533	Lamc2,Nfkb1,Myd88,H2-DMa,H2-Ab1,H2-Aa,Igtp,Irak4,Mapk11,Lama3,Stat3,Stat1,H2-Eb1	0.0018	0.0133
KEGG	10090	Kid. Cortex	Upregulated	mmu05143	African trypanosomiasis	7	35	10090.ENSMUSP00000023589,10090.ENSMUSP00000029574,10090.ENSMUSP00000034588,10090.ENSMUSP00000035092,10090.ENSMUSP00000083587,10090.ENSMUSP00000097623,10090.ENSMUSP00000099583	Kng1,Vcam1,Apoa1,Myd88,Icam1,Kng2,Plcb2	0.0019	0.0136
KEGG	10090	Kid. Cortex	Upregulated	mmu05167	Kaposi sarcoma-associated herpesvirus infection	20	210	10090.ENSMUSP00000024884,10090.ENSMUSP00000025181,10090.ENSMUSP00000029812,10090.ENSMUSP00000034056,10090.ENSMUSP00000037180,10090.ENSMUSP00000038150,10090.ENSMUSP00000074198,10090.ENSMUSP00000082855,10090.ENSMUSP00000083587,10090.ENSMUSP00000086204,10090.ENSMUSP00000099944,10090.ENSMUSP00000101315,10090.ENSMUSP00000109872,10090.ENSMUSP00000113852,10090.ENSMUSP00000120152,10090.ENSMUSP00000134163…	Eif2ak2,H2-K1,Nfkb1,Tlr3,Prex1,Itpr3,Nfatc2,Stat2,Icam1,Mapk11,Ppp3r1,Pik3cd,Traf2,Syk,Stat3,H2-Q10,H2-D1,Il6st,Stat1,Fgf2	0.0022	0.0157
KEGG	10090	Kid. Cortex	Upregulated	mmu05100	Bacterial invasion of epithelial cells	10	71	10090.ENSMUSP00000007799,10090.ENSMUSP00000023128,10090.ENSMUSP00000023531,10090.ENSMUSP00000054499,10090.ENSMUSP00000072334,10090.ENSMUSP00000082822,10090.ENSMUSP00000101315,10090.ENSMUSP00000102536,10090.ENSMUSP00000113038,10090.ENSMUSP00000146244	Cav1,Itga5,Hcls1,Fn1,Elmo1,Arpc1b,Pik3cd,Rhog,Sept8,Cbl	0.0024	0.0165
KEGG	10090	Kid. Cortex	Upregulated	mmu04217	Necroptosis	16	153	10090.ENSMUSP00000015484,10090.ENSMUSP00000022830,10090.ENSMUSP00000024884,10090.ENSMUSP00000027015,10090.ENSMUSP00000029018,10090.ENSMUSP00000034056,10090.ENSMUSP00000055521,10090.ENSMUSP00000057095,10090.ENSMUSP00000070868,10090.ENSMUSP00000082855,10090.ENSMUSP00000092002,10090.ENSMUSP00000109872,10090.ENSMUSP00000120152,10090.ENSMUSP00000141132,10090.ENSMUSP00000147285,10090.ENSMUSP00000158539	Cybb,Ripk3,Eif2ak2,Casp1,Zbp1,Tlr3,Mlkl,Spata2,Pla2g4a,Stat2,Ftl1,Traf2,Stat3,Stat1,Chmp1b,Fth1	0.0025	0.0172
KEGG	10090	Kid. Cortex	Upregulated	mmu04979	Cholesterol metabolism	8	48	10090.ENSMUSP00000030010,10090.ENSMUSP00000034588,10090.ENSMUSP00000036044,10090.ENSMUSP00000044004,10090.ENSMUSP00000083242,10090.ENSMUSP00000104091,10090.ENSMUSP00000133302,10090.ENSMUSP00000140721	Abca1,Apoa1,Apob,Lrp1,Scarb1,Apoc1,Apoe,Soat1	0.0025	0.0172
KEGG	10090	Kid. Cortex	Upregulated	mmu05321	Inflammatory bowel disease	9	60	10090.ENSMUSP00000029812,10090.ENSMUSP00000034973,10090.ENSMUSP00000037088,10090.ENSMUSP00000041008,10090.ENSMUSP00000046105,10090.ENSMUSP00000120152,10090.ENSMUSP00000130115,10090.ENSMUSP00000141132,10090.ENSMUSP00000158533	Nfkb1,Smad3,H2-DMa,H2-Ab1,H2-Aa,Stat3,Smad2,Stat1,H2-Eb1	0.0027	0.0173
KEGG	10090	Kid. Cortex	Upregulated	mmu05020	Prion disease	23	263	10090.ENSMUSP00000001513,10090.ENSMUSP00000001566,10090.ENSMUSP00000007799,10090.ENSMUSP00000015484,10090.ENSMUSP00000016094,10090.ENSMUSP00000020157,10090.ENSMUSP00000021639,10090.ENSMUSP00000022749,10090.ENSMUSP00000027009,10090.ENSMUSP00000028233,10090.ENSMUSP00000031663,10090.ENSMUSP00000036384,10090.ENSMUSP00000036747,10090.ENSMUSP00000038150,10090.ENSMUSP00000040246,10090.ENSMUSP00000041855…	Tubb6,Tubb5,Cav1,Cybb,Ncf1,Apaf1,Tubal3,C9,Casp12,Hc,C8b,Rac2,C1qc,Itpr3,C1qb,C8g,C1qa,C8a,Klc1,Mapk11,Ppp3r1,Pik3cd,Ncf2	0.003	0.0191
KEGG	10090	Kid. Cortex	Upregulated	mmu05410	Hypertrophic cardiomyopathy	11	88	10090.ENSMUSP00000003575,10090.ENSMUSP00000023128,10090.ENSMUSP00000027409,10090.ENSMUSP00000028106,10090.ENSMUSP00000049457,10090.ENSMUSP00000066488,10090.ENSMUSP00000099718,10090.ENSMUSP00000103546,10090.ENSMUSP00000109337,10090.ENSMUSP00000127604,10090.ENSMUSP00000132512	Tpm4,Itga5,Des,Itga8,Cacna2d1,Agt,Itga4,Tpm2,Tpm1,Itgb4,Cacna2d2	0.0034	0.0214
KEGG	10090	Kid. Cortex	Upregulated	mmu04640	Hematopoietic cell lineage	11	90	10090.ENSMUSP00000005218,10090.ENSMUSP00000014743,10090.ENSMUSP00000023128,10090.ENSMUSP00000037088,10090.ENSMUSP00000041008,10090.ENSMUSP00000046105,10090.ENSMUSP00000056669,10090.ENSMUSP00000068468,10090.ENSMUSP00000099718,10090.ENSMUSP00000110923,10090.ENSMUSP00000158533	Cd44,Csf1,Itga5,H2-DMa,H2-Ab1,H2-Aa,Cd14,Itgam,Itga4,Csf1r,H2-Eb1	0.004	0.0246
KEGG	10090	Kid. Cortex	Upregulated	mmu04672	Intestinal immune network for IgA production	7	41	10090.ENSMUSP00000027675,10090.ENSMUSP00000037088,10090.ENSMUSP00000041008,10090.ENSMUSP00000046105,10090.ENSMUSP00000099718,10090.ENSMUSP00000101032,10090.ENSMUSP00000158533	Pigr,H2-DMa,H2-Ab1,H2-Aa,Itga4,Icosl,H2-Eb1	0.0041	0.0246
KEGG	10090	Kid. Cortex	Upregulated	mmu05414	Dilated cardiomyopathy	11	90	10090.ENSMUSP00000003575,10090.ENSMUSP00000023128,10090.ENSMUSP00000027409,10090.ENSMUSP00000028106,10090.ENSMUSP00000049457,10090.ENSMUSP00000066488,10090.ENSMUSP00000099718,10090.ENSMUSP00000103546,10090.ENSMUSP00000109337,10090.ENSMUSP00000127604,10090.ENSMUSP00000132512	Tpm4,Itga5,Des,Itga8,Cacna2d1,Agt,Itga4,Tpm2,Tpm1,Itgb4,Cacna2d2	0.004	0.0246
KEGG	10090	Kid. Cortex	Upregulated	mmu05170	Human immunodeficiency virus 1 infection	20	224	10090.ENSMUSP00000020099,10090.ENSMUSP00000025161,10090.ENSMUSP00000025181,10090.ENSMUSP00000025197,10090.ENSMUSP00000029812,10090.ENSMUSP00000035092,10090.ENSMUSP00000036384,10090.ENSMUSP00000038150,10090.ENSMUSP00000059717,10090.ENSMUSP00000074198,10090.ENSMUSP00000074471,10090.ENSMUSP00000086204,10090.ENSMUSP00000099944,10090.ENSMUSP00000101315,10090.ENSMUSP00000109872,10090.ENSMUSP00000111393…	Cdk1,Tapbp,H2-K1,Tap2,Nfkb1,Myd88,Rac2,Itpr3,Samhd1,Nfatc2,Irak4,Mapk11,Ppp3r1,Pik3cd,Traf2,Tmem173,Tap1,H2-Q10,H2-D1,Cfl1	0.0044	0.0254
KEGG	10090	Kid. Cortex	Upregulated	mmu05165	Human papillomavirus infection	27	342	10090.ENSMUSP00000017488,10090.ENSMUSP00000023128,10090.ENSMUSP00000024884,10090.ENSMUSP00000025181,10090.ENSMUSP00000025522,10090.ENSMUSP00000027753,10090.ENSMUSP00000028106,10090.ENSMUSP00000029812,10090.ENSMUSP00000031542,10090.ENSMUSP00000034056,10090.ENSMUSP00000044903,10090.ENSMUSP00000054499,10090.ENSMUSP00000082548,10090.ENSMUSP00000082855,10090.ENSMUSP00000084043,10090.ENSMUSP00000089703…	Vtn,Itga5,Eif2ak2,H2-K1,Pdgfrb,Lamc2,Itga8,Nfkb1,Oasl2,Tlr3,Thbs1,Fn1,Isg15,Stat2,Spp1,Lama3,Itga4,Pik3cd,Tnc,Oasl1,Vwf,Tcirg1,Ccnd3,Itgb4,H2-Q10,H2-D1,Stat1	0.0051	0.029
KEGG	10090	Kid. Cortex	Upregulated	mmu04530	Tight junction	15	152	10090.ENSMUSP00000016771,10090.ENSMUSP00000021554,10090.ENSMUSP00000021639,10090.ENSMUSP00000023531,10090.ENSMUSP00000028817,10090.ENSMUSP00000032561,10090.ENSMUSP00000033505,10090.ENSMUSP00000035121,10090.ENSMUSP00000039707,10090.ENSMUSP00000049228,10090.ENSMUSP00000085913,10090.ENSMUSP00000095174,10090.ENSMUSP00000104890,10090.ENSMUSP00000123412,10090.ENSMUSP00000155052	Myh9,Actn1,Tubal3,Hcls1,Pcna,Vasp,Was,Amotl2,Micall2,Cftr,Myl9,Synpo,Map3k1,Myl12a,Myh11	0.0056	0.0314
KEGG	10090	Kid. Cortex	Upregulated	mmu05166	Human T-cell leukemia virus 1 infection	20	232	10090.ENSMUSP00000000299,10090.ENSMUSP00000002445,10090.ENSMUSP00000025181,10090.ENSMUSP00000029812,10090.ENSMUSP00000034973,10090.ENSMUSP00000037088,10090.ENSMUSP00000041008,10090.ENSMUSP00000046105,10090.ENSMUSP00000074198,10090.ENSMUSP00000083587,10090.ENSMUSP00000099944,10090.ENSMUSP00000101315,10090.ENSMUSP00000104890,10090.ENSMUSP00000107512,10090.ENSMUSP00000125777,10090.ENSMUSP00000126141…	Itgb2,Ranbp3,H2-K1,Nfkb1,Smad3,H2-DMa,H2-Ab1,H2-Aa,Nfatc2,Icam1,Ppp3r1,Pik3cd,Map3k1,Nfkb2,Lck,Ccnd3,Smad2,H2-Q10,H2-D1,H2-Eb1	0.0062	0.0344
KEGG	10090	Kid. Cortex	Upregulated	mmu04370	VEGF signaling pathway	8	57	10090.ENSMUSP00000005077,10090.ENSMUSP00000036384,10090.ENSMUSP00000070868,10090.ENSMUSP00000074198,10090.ENSMUSP00000086204,10090.ENSMUSP00000099944,10090.ENSMUSP00000101315,10090.ENSMUSP00000131010	Hspb1,Rac2,Pla2g4a,Nfatc2,Mapk11,Ppp3r1,Pik3cd,Sphk1	0.0064	0.035
KEGG	10090	Kid. Cortex	Upregulated	mmu04668	TNF signaling pathway	12	112	10090.ENSMUSP00000014743,10090.ENSMUSP00000022830,10090.ENSMUSP00000025903,10090.ENSMUSP00000029574,10090.ENSMUSP00000029812,10090.ENSMUSP00000034230,10090.ENSMUSP00000055521,10090.ENSMUSP00000083587,10090.ENSMUSP00000086204,10090.ENSMUSP00000101315,10090.ENSMUSP00000104825,10090.ENSMUSP00000109872	Csf1,Ripk3,Rps6ka4,Vcam1,Nfkb1,Cx3cl1,Mlkl,Icam1,Mapk11,Pik3cd,Ifi47,Traf2	0.007	0.0376
KEGG	10090	Kid. Cortex	Upregulated	mmu04115	p53 signaling pathway	9	71	10090.ENSMUSP00000002152,10090.ENSMUSP00000020099,10090.ENSMUSP00000020157,10090.ENSMUSP00000020980,10090.ENSMUSP00000039586,10090.ENSMUSP00000044903,10090.ENSMUSP00000050374,10090.ENSMUSP00000108260,10090.ENSMUSP00000126141	Bbc3,Cdk1,Apaf1,Rrm2,Serpine1,Thbs1,Sfn,Steap3,Ccnd3	0.0072	0.0377
KEGG	10090	Kid. Cortex	Upregulated	mmu04924	Renin secretion	9	71	10090.ENSMUSP00000029635,10090.ENSMUSP00000038150,10090.ENSMUSP00000038749,10090.ENSMUSP00000054526,10090.ENSMUSP00000066488,10090.ENSMUSP00000099583,10090.ENSMUSP00000099944,10090.ENSMUSP00000111398,10090.ENSMUSP00000142138	Gucy1b1,Itpr3,Pde3a,Clca3a1,Agt,Plcb2,Ppp3r1,Gucy1a2,Gucy1a1	0.0072	0.0377
KEGG	10090	Kid. Cortex	Upregulated	mmu05310	Asthma	5	24	10090.ENSMUSP00000037088,10090.ENSMUSP00000041008,10090.ENSMUSP00000046105,10090.ENSMUSP00000078875,10090.ENSMUSP00000158533	H2-DMa,H2-Ab1,H2-Aa,Fcer1g,H2-Eb1	0.0072	0.0377
KEGG	10090	Kid. Cortex	Upregulated	mmu04658	Th1 and Th2 cell differentiation	10	86	10090.ENSMUSP00000029812,10090.ENSMUSP00000037088,10090.ENSMUSP00000041008,10090.ENSMUSP00000046105,10090.ENSMUSP00000074198,10090.ENSMUSP00000086204,10090.ENSMUSP00000099944,10090.ENSMUSP00000125777,10090.ENSMUSP00000141132,10090.ENSMUSP00000158533	Nfkb1,H2-DMa,H2-Ab1,H2-Aa,Nfatc2,Mapk11,Ppp3r1,Lck,Stat1,H2-Eb1	0.0081	0.0406
KEGG	10090	Kid. Cortex	Upregulated	mmu04360	Axon guidance	16	175	10090.ENSMUSP00000029700,10090.ENSMUSP00000036384,10090.ENSMUSP00000041243,10090.ENSMUSP00000042150,10090.ENSMUSP00000066857,10090.ENSMUSP00000074198,10090.ENSMUSP00000079733,10090.ENSMUSP00000080389,10090.ENSMUSP00000081569,10090.ENSMUSP00000085913,10090.ENSMUSP00000095195,10090.ENSMUSP00000099944,10090.ENSMUSP00000101315,10090.ENSMUSP00000123412,10090.ENSMUSP00000142284,10090.ENSMUSP00000147514	Sema4a,Rac2,Ablim3,Rras,Slit3,Nfatc2,Fes,Srgap1,Rgs3,Myl9,Srgap2,Ppp3r1,Pik3cd,Myl12a,Sema4c,Cfl1	0.0083	0.041
KEGG	10090	Kid. Cortex	Upregulated	mmu00600	Sphingolipid metabolism	7	48	10090.ENSMUSP00000008350,10090.ENSMUSP00000127646,10090.ENSMUSP00000130660,10090.ENSMUSP00000131010,10090.ENSMUSP00000135604,10090.ENSMUSP00000137476,10090.ENSMUSP00000159121	Cers4,Arsa,Gba,Sphk1,Cers6,Psap,Gla	0.0088	0.0411
KEGG	10090	Kid. Cortex	Upregulated	mmu04921	Oxytocin signaling pathway	14	145	10090.ENSMUSP00000013886,10090.ENSMUSP00000023538,10090.ENSMUSP00000029635,10090.ENSMUSP00000038150,10090.ENSMUSP00000049457,10090.ENSMUSP00000070868,10090.ENSMUSP00000074198,10090.ENSMUSP00000085913,10090.ENSMUSP00000099583,10090.ENSMUSP00000099944,10090.ENSMUSP00000107297,10090.ENSMUSP00000111398,10090.ENSMUSP00000132512,10090.ENSMUSP00000142138	Ppp1r12c,Mylk,Gucy1b1,Itpr3,Cacna2d1,Pla2g4a,Nfatc2,Myl9,Plcb2,Ppp3r1,Camkk2,Gucy1a2,Cacna2d2,Gucy1a1	0.0086	0.0411
KEGG	10090	Kid. Cortex	Upregulated	mmu05134	Legionellosis	8	60	10090.ENSMUSP00000000299,10090.ENSMUSP00000020157,10090.ENSMUSP00000027015,10090.ENSMUSP00000029812,10090.ENSMUSP00000035092,10090.ENSMUSP00000056669,10090.ENSMUSP00000068468,10090.ENSMUSP00000107512	Itgb2,Apaf1,Casp1,Nfkb1,Myd88,Cd14,Itgam,Nfkb2	0.0084	0.0411
KEGG	10090	Kid. Cortex	Upregulated	mmu05161	Hepatitis B	15	160	10090.ENSMUSP00000020157,10090.ENSMUSP00000027009,10090.ENSMUSP00000028817,10090.ENSMUSP00000029812,10090.ENSMUSP00000034056,10090.ENSMUSP00000034973,10090.ENSMUSP00000035092,10090.ENSMUSP00000074198,10090.ENSMUSP00000074471,10090.ENSMUSP00000082855,10090.ENSMUSP00000086204,10090.ENSMUSP00000101315,10090.ENSMUSP00000104890,10090.ENSMUSP00000120152,10090.ENSMUSP00000141132	Apaf1,Casp12,Pcna,Nfkb1,Tlr3,Smad3,Myd88,Nfatc2,Irak4,Stat2,Mapk11,Pik3cd,Map3k1,Stat3,Stat1	0.0085	0.0411
KEGG	10090	Kid. Cortex	Upregulated	mmu04662	B cell receptor signaling pathway	9	74	10090.ENSMUSP00000005889,10090.ENSMUSP00000029812,10090.ENSMUSP00000036270,10090.ENSMUSP00000036384,10090.ENSMUSP00000074198,10090.ENSMUSP00000099944,10090.ENSMUSP00000101315,10090.ENSMUSP00000113852,10090.ENSMUSP00000127941	Vav1,Nfkb1,Vav3,Rac2,Nfatc2,Ppp3r1,Pik3cd,Syk,Inpp5d	0.0091	0.0418
KEGG	10090	Kid. Cortex	Upregulated	mmu00603	Glycosphingolipid biosynthesis - globo and isoglobo series	4	16	10090.ENSMUSP00000023088,10090.ENSMUSP00000026262,10090.ENSMUSP00000154853,10090.ENSMUSP00000159121	Naga,Hexa,St3gal1,Gla	0.0094	0.0427
KEGG	10090	Kid. Cortex	Upregulated	mmu04072	Phospholipase D signaling pathway	14	147	10090.ENSMUSP00000024594,10090.ENSMUSP00000025522,10090.ENSMUSP00000028681,10090.ENSMUSP00000042150,10090.ENSMUSP00000042698,10090.ENSMUSP00000066488,10090.ENSMUSP00000070868,10090.ENSMUSP00000074290,10090.ENSMUSP00000078875,10090.ENSMUSP00000099583,10090.ENSMUSP00000101315,10090.ENSMUSP00000113852,10090.ENSMUSP00000127173,10090.ENSMUSP00000131010	Agpat4,Pdgfrb,F2,Rras,Cyth4,Agt,Pla2g4a,Dgkh,Fcer1g,Plcb2,Pik3cd,Syk,Pdgfra,Sphk1	0.0095	0.0428
KEGG	10090	Kid. Cortex	Upregulated	mmu05332	Graft-versus-host disease	7	50	10090.ENSMUSP00000025181,10090.ENSMUSP00000037088,10090.ENSMUSP00000041008,10090.ENSMUSP00000046105,10090.ENSMUSP00000134163,10090.ENSMUSP00000134570,10090.ENSMUSP00000158533	H2-K1,H2-DMa,H2-Ab1,H2-Aa,H2-Q10,H2-D1,H2-Eb1	0.0106	0.0471
KEGG	10090	Kid. Cortex	Upregulated	mmu04071	Sphingolipid signaling pathway	12	120	10090.ENSMUSP00000008350,10090.ENSMUSP00000023589,10090.ENSMUSP00000029812,10090.ENSMUSP00000036384,10090.ENSMUSP00000078875,10090.ENSMUSP00000086204,10090.ENSMUSP00000097623,10090.ENSMUSP00000099583,10090.ENSMUSP00000101315,10090.ENSMUSP00000109872,10090.ENSMUSP00000131010,10090.ENSMUSP00000135604	Cers4,Kng1,Nfkb1,Rac2,Fcer1g,Mapk11,Kng2,Plcb2,Pik3cd,Traf2,Sphk1,Cers6	0.0113	0.0494
KEGG	10090	Kid. Cortex	Upregulated	mmu05168	Herpes simplex virus 1 infection	30	419	10090.ENSMUSP00000020157,10090.ENSMUSP00000023128,10090.ENSMUSP00000024884,10090.ENSMUSP00000025161,10090.ENSMUSP00000025181,10090.ENSMUSP00000025197,10090.ENSMUSP00000028233,10090.ENSMUSP00000029812,10090.ENSMUSP00000031513,10090.ENSMUSP00000034056,10090.ENSMUSP00000035092,10090.ENSMUSP00000037088,10090.ENSMUSP00000041008,10090.ENSMUSP00000046105,10090.ENSMUSP00000066399,10090.ENSMUSP00000074471…	Apaf1,Itga5,Eif2ak2,Tapbp,H2-K1,Tap2,Hc,Nfkb1,Srsf9,Tlr3,Myd88,H2-DMa,H2-Ab1,H2-Aa,Sp100,Irak4,Oas1a,Pml,Stat2,Rnasel,Cd74,Pik3cd,Traf2,Tmem173,Syk,Tap1,H2-Q10,H2-D1,Stat1,H2-Eb1	0.0113	0.0494
KEGG	10090	Kid. Cortex	Upregulated	mmu05330	Allograft rejection	7	51	10090.ENSMUSP00000025181,10090.ENSMUSP00000037088,10090.ENSMUSP00000041008,10090.ENSMUSP00000046105,10090.ENSMUSP00000134163,10090.ENSMUSP00000134570,10090.ENSMUSP00000158533	H2-K1,H2-DMa,H2-Ab1,H2-Aa,H2-Q10,H2-D1,H2-Eb1	0.0117	0.0496
KEGG	10090	Kid. Cortex	Downregulated	mmu01100	Metabolic pathways	158	1534	10090.ENSMUSP00000000090,10090.ENSMUSP00000000317,10090.ENSMUSP00000000349,10090.ENSMUSP00000003620,10090.ENSMUSP00000004396,10090.ENSMUSP00000006431,10090.ENSMUSP00000006544,10090.ENSMUSP00000007340,10090.ENSMUSP00000013737,10090.ENSMUSP00000014438,10090.ENSMUSP00000015829,10090.ENSMUSP00000019354,10090.ENSMUSP00000020034,10090.ENSMUSP00000020169,10090.ENSMUSP00000020241,10090.ENSMUSP00000020277…	Cox5a,Ckmt1,Dbt,Prodh,Atp6v1f,Atp6v1b1,Gcat,Atp12a,Ndufs2,Ndufa2,Acadsb,Atp6v1e1,Echdc1,Enpp3,Pah,Hkdc1,Pgam2,Atp6v1c2,L2hgdh,Mthfd1,Atp6v1d,Adssl1,Elovl2,Auh,Uqcrb,Mccc2,Pdhb,Ndufs4,Oxsm,Dpys,Ndufb9,Ndufa6,Miox,Atp5j,Atp5o,Ndufa5,Impa2,Dcxr,Hsd17b10,Atp5b,Echs1,Uqcrc1,Fh1,Ivd,Hdc,Idh3b,Mccc1,Hadh,Atp6v0d2,Hmgcl,Akr1a1,Ak2,Mecr,Hpd,Mmab,Sdsl,Hibadh,Gstk1,Gucy2c,Gys2,Fah,Bcat2,Ndufab1,Ears2,Uqcrc2…	9.04e-64	3e-61
KEGG	10090	Kid. Cortex	Downregulated	mmu00190	Oxidative phosphorylation	41	130	10090.ENSMUSP00000000090,10090.ENSMUSP00000004396,10090.ENSMUSP00000006431,10090.ENSMUSP00000007340,10090.ENSMUSP00000013737,10090.ENSMUSP00000014438,10090.ENSMUSP00000019354,10090.ENSMUSP00000020884,10090.ENSMUSP00000021536,10090.ENSMUSP00000021993,10090.ENSMUSP00000022286,10090.ENSMUSP00000022980,10090.ENSMUSP00000023085,10090.ENSMUSP00000023608,10090.ENSMUSP00000023677,10090.ENSMUSP00000023851…	Cox5a,Atp6v1f,Atp6v1b1,Atp12a,Ndufs2,Ndufa2,Atp6v1e1,Atp6v1c2,Atp6v1d,Uqcrb,Ndufs4,Ndufb9,Ndufa6,Atp5j,Atp5o,Ndufa5,Atp5b,Uqcrc1,Ppa2,Atp6v0d2,Ndufab1,Uqcrc2,Ndufb7,Ndufa7,Atp6v1h,Ndufb10,Uqcrfs1,Ndufa8,Cox6b1,Uqcrh,mt-Co2,Ndufb6,Ndufs7,Atp5h,Ndufa13,Ndufb11,Ndufb5,Ndufv2,Cox6c,Atp5j2,Cox4i1	4.29e-32	7.12e-30
KEGG	10090	Kid. Cortex	Downregulated	mmu00280	Valine, leucine and isoleucine degradation	30	55	10090.ENSMUSP00000000349,10090.ENSMUSP00000015829,10090.ENSMUSP00000021913,10090.ENSMUSP00000022148,10090.ENSMUSP00000026289,10090.ENSMUSP00000026538,10090.ENSMUSP00000028807,10090.ENSMUSP00000029259,10090.ENSMUSP00000029610,10090.ENSMUSP00000030432,10090.ENSMUSP00000031788,10090.ENSMUSP00000033098,10090.ENSMUSP00000035116,10090.ENSMUSP00000037348,10090.ENSMUSP00000038763,10090.ENSMUSP00000042351…	Dbt,Acadsb,Auh,Mccc2,Hsd17b10,Echs1,Ivd,Mccc1,Hadh,Hmgcl,Hibadh,Bcat2,Pccb,Acaa2,Pcca,Acaa1a,Hibch,Mcee,Acad8,Abat,Aldh7a1,Bckdha,Aldh6a1,Oxct2b,Oxct1,Dld,Hadhb,Hadha,Mmut,Bckdhb	2.26e-29	2.51e-27
KEGG	10090	Kid. Cortex	Downregulated	mmu04714	Thermogenesis	41	225	10090.ENSMUSP00000000090,10090.ENSMUSP00000013737,10090.ENSMUSP00000014438,10090.ENSMUSP00000021993,10090.ENSMUSP00000022286,10090.ENSMUSP00000022980,10090.ENSMUSP00000023085,10090.ENSMUSP00000023608,10090.ENSMUSP00000023677,10090.ENSMUSP00000023851,10090.ENSMUSP00000026459,10090.ENSMUSP00000026743,10090.ENSMUSP00000027781,10090.ENSMUSP00000029925,10090.ENSMUSP00000033157,10090.ENSMUSP00000033176…	Cox5a,Ndufs2,Ndufa2,Uqcrb,Ndufs4,Ndufb9,Ndufa6,Atp5j,Atp5o,Ndufa5,Atp5b,Uqcrc1,Cox20,Ndufaf4,Ndufab1,Uqcrc2,Acsl1,Ndufaf5,Ndufb7,Ndufa7,Ndufb10,Uqcrfs1,Coa4,Ndufa8,Ndufaf3,Cox6b1,Uqcrh,mt-Co2,Ndufb6,Ndufs7,Atp5h,Acsl6,Cpt1b,Ndufa13,Ndufb11,Ndufb5,Ndufv2,Cox6c,Atp5j2,Dpf3,Cox4i1	3.95e-24	3.28e-22
KEGG	10090	Kid. Cortex	Downregulated	mmu01200	Carbon metabolism	29	122	10090.ENSMUSP00000020277,10090.ENSMUSP00000020768,10090.ENSMUSP00000022268,10090.ENSMUSP00000026538,10090.ENSMUSP00000027810,10090.ENSMUSP00000028892,10090.ENSMUSP00000031594,10090.ENSMUSP00000033585,10090.ENSMUSP00000033662,10090.ENSMUSP00000034097,10090.ENSMUSP00000034567,10090.ENSMUSP00000035116,10090.ENSMUSP00000037131,10090.ENSMUSP00000038763,10090.ENSMUSP00000045606,10090.ENSMUSP00000047761…	Hkdc1,Pgam2,Pdhb,Echs1,Fh1,Idh3b,Sdsl,Pgk2,Pdha1,Got2,Dlat,Pccb,Gcsh,Pcca,Hibch,Glyctk,Mcee,Idh3g,Idnk,Suclg1,Aldh6a1,Ogdh,Idh2,Dld,Gapdh,Hadha,Sucla2,Mmut,Suclg2	3.99e-20	2.65e-18
KEGG	10090	Kid. Cortex	Downregulated	mmu00640	Propanoate metabolism	19	34	10090.ENSMUSP00000000349,10090.ENSMUSP00000020034,10090.ENSMUSP00000026538,10090.ENSMUSP00000035116,10090.ENSMUSP00000038763,10090.ENSMUSP00000045606,10090.ENSMUSP00000047855,10090.ENSMUSP00000063548,10090.ENSMUSP00000065113,10090.ENSMUSP00000071292,10090.ENSMUSP00000082288,10090.ENSMUSP00000099642,10090.ENSMUSP00000106481,10090.ENSMUSP00000120976,10090.ENSMUSP00000123765,10090.ENSMUSP00000128209…	Dbt,Echdc1,Echs1,Pccb,Pcca,Hibch,Mcee,Abat,Suclg1,Bckdha,Aldh6a1,Acacb,Dld,Hadha,Sucla2,Acss3,Mmut,Bckdhb,Suclg2	3.33e-19	1.84e-17
KEGG	10090	Kid. Cortex	Downregulated	mmu04932	Non-alcoholic fatty liver disease	29	147	10090.ENSMUSP00000000090,10090.ENSMUSP00000004560,10090.ENSMUSP00000013737,10090.ENSMUSP00000014438,10090.ENSMUSP00000021993,10090.ENSMUSP00000022286,10090.ENSMUSP00000022980,10090.ENSMUSP00000023085,10090.ENSMUSP00000023851,10090.ENSMUSP00000026743,10090.ENSMUSP00000033157,10090.ENSMUSP00000033176,10090.ENSMUSP00000037341,10090.ENSMUSP00000039692,10090.ENSMUSP00000043543,10090.ENSMUSP00000045284…	Cox5a,Bid,Ndufs2,Ndufa2,Uqcrb,Ndufs4,Ndufb9,Ndufa6,Ndufa5,Uqcrc1,Ndufab1,Uqcrc2,Ndufb7,Ndufa7,Ndufb10,Uqcrfs1,Ndufa8,Lep,Cox6b1,Uqcrh,mt-Co2,Ndufb6,Ndufs7,Ndufa13,Ndufb11,Ndufb5,Ndufv2,Cox6c,Cox4i1	3.28e-18	1.55e-16
KEGG	10090	Kid. Cortex	Downregulated	mmu05012	Parkinson disease	34	238	10090.ENSMUSP00000000090,10090.ENSMUSP00000013737,10090.ENSMUSP00000014438,10090.ENSMUSP00000021993,10090.ENSMUSP00000022286,10090.ENSMUSP00000022980,10090.ENSMUSP00000023085,10090.ENSMUSP00000023608,10090.ENSMUSP00000023677,10090.ENSMUSP00000023851,10090.ENSMUSP00000026459,10090.ENSMUSP00000026743,10090.ENSMUSP00000033157,10090.ENSMUSP00000033176,10090.ENSMUSP00000034049,10090.ENSMUSP00000037341…	Cox5a,Ndufs2,Ndufa2,Uqcrb,Ndufs4,Ndufb9,Ndufa6,Atp5j,Atp5o,Ndufa5,Atp5b,Uqcrc1,Ndufab1,Uqcrc2,Slc25a4,Ndufb7,Ndufa7,Ndufb10,Uqcrfs1,Ndufa8,Cox6b1,Uqcrh,mt-Co2,Slc25a31,Ndufb6,Vdac1,Ndufs7,Atp5h,Ndufa13,Ndufb11,Ndufb5,Ndufv2,Cox6c,Cox4i1	2.77e-17	1.15e-15
KEGG	10090	Kid. Cortex	Downregulated	mmu05016	Huntington disease	37	297	10090.ENSMUSP00000000090,10090.ENSMUSP00000007012,10090.ENSMUSP00000013737,10090.ENSMUSP00000014438,10090.ENSMUSP00000021993,10090.ENSMUSP00000022286,10090.ENSMUSP00000022980,10090.ENSMUSP00000023085,10090.ENSMUSP00000023608,10090.ENSMUSP00000023677,10090.ENSMUSP00000023851,10090.ENSMUSP00000026459,10090.ENSMUSP00000026743,10090.ENSMUSP00000033157,10090.ENSMUSP00000033176,10090.ENSMUSP00000034049…	Cox5a,Sod2,Ndufs2,Ndufa2,Uqcrb,Ndufs4,Ndufb9,Ndufa6,Atp5j,Atp5o,Ndufa5,Atp5b,Uqcrc1,Ndufab1,Uqcrc2,Slc25a4,Ndufb7,Ndufa7,Ndufb10,Uqcrfs1,Kcnj10,Ndufa8,Cox6b1,Uqcrh,mt-Co2,Slc25a31,Tfam,Ndufb6,Vdac1,Ndufs7,Atp5h,Ndufa13,Ndufb11,Ndufb5,Ndufv2,Cox6c,Cox4i1	5.91e-17	2.18e-15
KEGG	10090	Kid. Cortex	Downregulated	mmu05020	Prion disease	35	263	10090.ENSMUSP00000000090,10090.ENSMUSP00000013737,10090.ENSMUSP00000014438,10090.ENSMUSP00000021993,10090.ENSMUSP00000022286,10090.ENSMUSP00000022980,10090.ENSMUSP00000023085,10090.ENSMUSP00000023608,10090.ENSMUSP00000023677,10090.ENSMUSP00000023851,10090.ENSMUSP00000025910,10090.ENSMUSP00000026459,10090.ENSMUSP00000026743,10090.ENSMUSP00000033157,10090.ENSMUSP00000033176,10090.ENSMUSP00000034049…	Cox5a,Ndufs2,Ndufa2,Uqcrb,Ndufs4,Ndufb9,Ndufa6,Atp5j,Atp5o,Ndufa5,Bad,Atp5b,Uqcrc1,Ndufab1,Uqcrc2,Slc25a4,Ndufb7,Ndufa7,Ndufb10,Uqcrfs1,Ndufa8,Cox6b1,Uqcrh,mt-Co2,Slc25a31,Ndufb6,Vdac1,Ndufs7,Atp5h,Ndufa13,Ndufb11,Ndufb5,Ndufv2,Cox6c,Cox4i1	6.76e-17	2.24e-15
KEGG	10090	Kid. Cortex	Downregulated	mmu05010	Alzheimer disease	39	360	10090.ENSMUSP00000000090,10090.ENSMUSP00000004560,10090.ENSMUSP00000013737,10090.ENSMUSP00000014438,10090.ENSMUSP00000021993,10090.ENSMUSP00000022286,10090.ENSMUSP00000022980,10090.ENSMUSP00000023085,10090.ENSMUSP00000023608,10090.ENSMUSP00000023677,10090.ENSMUSP00000023851,10090.ENSMUSP00000025910,10090.ENSMUSP00000026289,10090.ENSMUSP00000026459,10090.ENSMUSP00000026743,10090.ENSMUSP00000032781…	Cox5a,Bid,Ndufs2,Ndufa2,Uqcrb,Ndufs4,Ndufb9,Ndufa6,Atp5j,Atp5o,Ndufa5,Bad,Hsd17b10,Atp5b,Uqcrc1,Nox4,Ndufab1,Uqcrc2,Slc25a4,Ndufb7,Ndufa7,Ndufb10,Uqcrfs1,Ndufa8,Cox6b1,Uqcrh,mt-Co2,Slc25a31,Ndufb6,Vdac1,Ndufs7,Atp5h,Ndufa13,Ndufb11,Gapdh,Ndufb5,Ndufv2,Cox6c,Cox4i1	5.91e-16	1.78e-14
KEGG	10090	Kid. Cortex	Downregulated	mmu05014	Amyotrophic lateral sclerosis	37	362	10090.ENSMUSP00000000090,10090.ENSMUSP00000004560,10090.ENSMUSP00000013737,10090.ENSMUSP00000014438,10090.ENSMUSP00000021993,10090.ENSMUSP00000022286,10090.ENSMUSP00000022980,10090.ENSMUSP00000023085,10090.ENSMUSP00000023608,10090.ENSMUSP00000023677,10090.ENSMUSP00000023851,10090.ENSMUSP00000025910,10090.ENSMUSP00000026459,10090.ENSMUSP00000026743,10090.ENSMUSP00000032264,10090.ENSMUSP00000033157…	Cox5a,Bid,Ndufs2,Ndufa2,Uqcrb,Ndufs4,Ndufb9,Ndufa6,Atp5j,Atp5o,Ndufa5,Bad,Atp5b,Uqcrc1,Gabarapl1,Ndufab1,Uqcrc2,Rab39b,Ndufb7,Ndufa7,Ndufb10,Uqcrfs1,Ndufa8,Cox6b1,Uqcrh,mt-Co2,Tardbp,Ndufb6,Vdac1,Ndufs7,Atp5h,Ndufa13,Ndufb11,Ndufb5,Ndufv2,Cox6c,Cox4i1	1.8e-14	4.97e-13
KEGG	10090	Kid. Cortex	Downregulated	mmu01212	Fatty acid metabolism	15	61	10090.ENSMUSP00000015829,10090.ENSMUSP00000021793,10090.ENSMUSP00000022311,10090.ENSMUSP00000026538,10090.ENSMUSP00000029610,10090.ENSMUSP00000030742,10090.ENSMUSP00000034046,10090.ENSMUSP00000037348,10090.ENSMUSP00000042351,10090.ENSMUSP00000051569,10090.ENSMUSP00000052872,10090.ENSMUSP00000104533,10090.ENSMUSP00000104936,10090.ENSMUSP00000110434,10090.ENSMUSP00000120976	Acadsb,Elovl2,Oxsm,Echs1,Hadh,Mecr,Acsl1,Acaa2,Acaa1a,Mcat,Fasn,Acsl6,Cpt1b,Hadhb,Hadha	3.21e-11	8.2e-10
KEGG	10090	Kid. Cortex	Downregulated	mmu00020	Citrate cycle (TCA cycle)	12	32	10090.ENSMUSP00000022268,10090.ENSMUSP00000027810,10090.ENSMUSP00000028892,10090.ENSMUSP00000033662,10090.ENSMUSP00000034567,10090.ENSMUSP00000056502,10090.ENSMUSP00000065113,10090.ENSMUSP00000091041,10090.ENSMUSP00000103007,10090.ENSMUSP00000106481,10090.ENSMUSP00000123765,10090.ENSMUSP00000144827	Pdhb,Fh1,Idh3b,Pdha1,Dlat,Idh3g,Suclg1,Ogdh,Idh2,Dld,Sucla2,Suclg2	5.28e-11	1.25e-09
KEGG	10090	Kid. Cortex	Downregulated	mmu00650	Butanoate metabolism	11	28	10090.ENSMUSP00000021370,10090.ENSMUSP00000026538,10090.ENSMUSP00000029610,10090.ENSMUSP00000030432,10090.ENSMUSP00000036140,10090.ENSMUSP00000063416,10090.ENSMUSP00000063548,10090.ENSMUSP00000099708,10090.ENSMUSP00000106318,10090.ENSMUSP00000110882,10090.ENSMUSP00000120976	L2hgdh,Echs1,Hadh,Hmgcl,Acsm1,Acsm5,Abat,Oxct2b,Oxct1,Bdh1,Hadha	2.27e-10	5.03e-09
KEGG	10090	Kid. Cortex	Downregulated	mmu04260	Cardiac muscle contraction	15	84	10090.ENSMUSP00000000090,10090.ENSMUSP00000021993,10090.ENSMUSP00000026743,10090.ENSMUSP00000027863,10090.ENSMUSP00000033176,10090.ENSMUSP00000035429,10090.ENSMUSP00000039657,10090.ENSMUSP00000045284,10090.ENSMUSP00000075150,10090.ENSMUSP00000077744,10090.ENSMUSP00000080994,10090.ENSMUSP00000083077,10090.ENSMUSP00000123609,10090.ENSMUSP00000132809,10090.ENSMUSP00000138019	Cox5a,Uqcrb,Uqcrc1,Atp1b1,Uqcrc2,Fxyd2,Atp1a1,Uqcrfs1,Cox6b1,Uqcrh,mt-Co2,Atp1a2,Cox6c,Slc8a1,Cox4i1	1.59e-09	3.29e-08
KEGG	10090	Kid. Cortex	Downregulated	mmu01230	Biosynthesis of amino acids	14	77	10090.ENSMUSP00000020241,10090.ENSMUSP00000020768,10090.ENSMUSP00000028892,10090.ENSMUSP00000031594,10090.ENSMUSP00000033098,10090.ENSMUSP00000033230,10090.ENSMUSP00000033585,10090.ENSMUSP00000034097,10090.ENSMUSP00000056502,10090.ENSMUSP00000083375,10090.ENSMUSP00000099904,10090.ENSMUSP00000103007,10090.ENSMUSP00000113942,10090.ENSMUSP00000124579	Pah,Pgam2,Idh3b,Sdsl,Bcat2,Tha1,Pgk2,Got2,Idh3g,Glul,Ass1,Idh2,Gapdh,Asl	4.55e-09	8.88e-08
KEGG	10090	Kid. Cortex	Downregulated	mmu04723	Retrograde endocannabinoid signaling	17	144	10090.ENSMUSP00000013737,10090.ENSMUSP00000014438,10090.ENSMUSP00000022286,10090.ENSMUSP00000022980,10090.ENSMUSP00000023085,10090.ENSMUSP00000023851,10090.ENSMUSP00000033157,10090.ENSMUSP00000037341,10090.ENSMUSP00000039692,10090.ENSMUSP00000043543,10090.ENSMUSP00000065352,10090.ENSMUSP00000092746,10090.ENSMUSP00000101003,10090.ENSMUSP00000105796,10090.ENSMUSP00000112320,10090.ENSMUSP00000114963…	Ndufs2,Ndufa2,Ndufs4,Ndufb9,Ndufa6,Ndufa5,Ndufab1,Ndufb7,Ndufa7,Ndufb10,Ndufa8,Ndufb6,Ndufs7,Ndufa13,Ndufb11,Ndufb5,Ndufv2	3.57e-08	6.58e-07
KEGG	10090	Kid. Cortex	Downregulated	mmu00071	Fatty acid degradation	11	50	10090.ENSMUSP00000015829,10090.ENSMUSP00000026538,10090.ENSMUSP00000029610,10090.ENSMUSP00000034046,10090.ENSMUSP00000037348,10090.ENSMUSP00000042351,10090.ENSMUSP00000065089,10090.ENSMUSP00000104533,10090.ENSMUSP00000104936,10090.ENSMUSP00000110434,10090.ENSMUSP00000120976	Acadsb,Echs1,Hadh,Acsl1,Acaa2,Acaa1a,Aldh7a1,Acsl6,Cpt1b,Hadhb,Hadha	3.78e-08	6.61e-07
KEGG	10090	Kid. Cortex	Downregulated	mmu00380	Tryptophan metabolism	11	51	10090.ENSMUSP00000026538,10090.ENSMUSP00000029610,10090.ENSMUSP00000038878,10090.ENSMUSP00000038914,10090.ENSMUSP00000048482,10090.ENSMUSP00000065089,10090.ENSMUSP00000078436,10090.ENSMUSP00000092769,10090.ENSMUSP00000101825,10090.ENSMUSP00000106481,10090.ENSMUSP00000120976	Echs1,Hadh,Aldh8a1,Kmo,Acmsd,Aldh7a1,Aadat,Dhtkd1,Kyat3,Dld,Hadha	4.52e-08	7.5e-07
KEGG	10090	Kid. Cortex	Downregulated	mmu04978	Mineral absorption	11	51	10090.ENSMUSP00000006638,10090.ENSMUSP00000022048,10090.ENSMUSP00000023774,10090.ENSMUSP00000027863,10090.ENSMUSP00000035429,10090.ENSMUSP00000038142,10090.ENSMUSP00000039657,10090.ENSMUSP00000045120,10090.ENSMUSP00000083077,10090.ENSMUSP00000119242,10090.ENSMUSP00000132809	Slc34a3,Slc6a19,Slc11a2,Atp1b1,Fxyd2,Slc9a3,Atp1a1,S100g,Atp1a2,Atp2b4,Slc8a1	4.52e-08	7.5e-07
KEGG	10090	Kid. Cortex	Downregulated	mmu00010	Glycolysis / Gluconeogenesis	11	65	10090.ENSMUSP00000020277,10090.ENSMUSP00000020768,10090.ENSMUSP00000022268,10090.ENSMUSP00000030455,10090.ENSMUSP00000033585,10090.ENSMUSP00000033662,10090.ENSMUSP00000034567,10090.ENSMUSP00000040580,10090.ENSMUSP00000065089,10090.ENSMUSP00000106481,10090.ENSMUSP00000113942	Hkdc1,Pgam2,Pdhb,Akr1a1,Pgk2,Pdha1,Dlat,Galm,Aldh7a1,Dld,Gapdh	3.94e-07	5.87e-06
KEGG	10090	Kid. Cortex	Downregulated	mmu00260	Glycine, serine and threonine metabolism	9	38	10090.ENSMUSP00000006544,10090.ENSMUSP00000020768,10090.ENSMUSP00000031594,10090.ENSMUSP00000033230,10090.ENSMUSP00000037131,10090.ENSMUSP00000039663,10090.ENSMUSP00000047761,10090.ENSMUSP00000065089,10090.ENSMUSP00000106481	Gcat,Pgam2,Sdsl,Tha1,Gcsh,Dmgdh,Glyctk,Aldh7a1,Dld	3.89e-07	5.87e-06
KEGG	10090	Kid. Cortex	Downregulated	mmu00061	Fatty acid biosynthesis	7	18	10090.ENSMUSP00000022311,10090.ENSMUSP00000030742,10090.ENSMUSP00000034046,10090.ENSMUSP00000051569,10090.ENSMUSP00000052872,10090.ENSMUSP00000099642,10090.ENSMUSP00000104533	Oxsm,Mecr,Acsl1,Mcat,Fasn,Acacb,Acsl6	4.92e-07	6.81e-06
KEGG	10090	Kid. Cortex	Downregulated	mmu00630	Glyoxylate and dicarboxylate metabolism	8	31	10090.ENSMUSP00000035116,10090.ENSMUSP00000037131,10090.ENSMUSP00000038763,10090.ENSMUSP00000047761,10090.ENSMUSP00000047855,10090.ENSMUSP00000083375,10090.ENSMUSP00000106481,10090.ENSMUSP00000130941	Pccb,Gcsh,Pcca,Glyctk,Mcee,Glul,Dld,Mmut	9.99e-07	1.33e-05
KEGG	10090	Kid. Cortex	Downregulated	mmu04964	Proximal tubule bicarbonate reclamation	7	22	10090.ENSMUSP00000004774,10090.ENSMUSP00000027863,10090.ENSMUSP00000035429,10090.ENSMUSP00000038142,10090.ENSMUSP00000039657,10090.ENSMUSP00000083077,10090.ENSMUSP00000121744	Aqp1,Atp1b1,Fxyd2,Slc9a3,Atp1a1,Atp1a2,Slc4a4	1.49e-06	1.9e-05
KEGG	10090	Kid. Cortex	Downregulated	mmu04966	Collecting duct acid secretion	7	27	10090.ENSMUSP00000004396,10090.ENSMUSP00000006378,10090.ENSMUSP00000006431,10090.ENSMUSP00000019354,10090.ENSMUSP00000020884,10090.ENSMUSP00000021536,10090.ENSMUSP00000029900	Atp6v1f,Clcnkb,Atp6v1b1,Atp6v1e1,Atp6v1c2,Atp6v1d,Atp6v0d2	4.7e-06	5.78e-05
KEGG	10090	Kid. Cortex	Downregulated	mmu00062	Fatty acid elongation	7	29	10090.ENSMUSP00000021793,10090.ENSMUSP00000026538,10090.ENSMUSP00000029610,10090.ENSMUSP00000030742,10090.ENSMUSP00000037348,10090.ENSMUSP00000110434,10090.ENSMUSP00000120976	Elovl2,Echs1,Hadh,Mecr,Acaa2,Hadhb,Hadha	7.04e-06	8.35e-05
KEGG	10090	Kid. Cortex	Downregulated	mmu00410	beta-Alanine metabolism	7	30	10090.ENSMUSP00000022915,10090.ENSMUSP00000026538,10090.ENSMUSP00000045606,10090.ENSMUSP00000063548,10090.ENSMUSP00000065089,10090.ENSMUSP00000082288,10090.ENSMUSP00000120976	Dpys,Echs1,Hibch,Abat,Aldh7a1,Aldh6a1,Hadha	8.54e-06	9.73e-05
KEGG	10090	Kid. Cortex	Downregulated	mmu04961	Endocrine and other factor-regulated calcium reabsorption	9	58	10090.ENSMUSP00000027863,10090.ENSMUSP00000029876,10090.ENSMUSP00000035429,10090.ENSMUSP00000039657,10090.ENSMUSP00000077899,10090.ENSMUSP00000083077,10090.ENSMUSP00000119242,10090.ENSMUSP00000129163,10090.ENSMUSP00000132809	Atp1b1,Calb1,Fxyd2,Atp1a1,Kl,Atp1a2,Atp2b4,Rab11a,Slc8a1	8.5e-06	9.73e-05
KEGG	10090	Kid. Cortex	Downregulated	mmu01210	2-Oxocarboxylic acid metabolism	6	20	10090.ENSMUSP00000028892,10090.ENSMUSP00000033098,10090.ENSMUSP00000034097,10090.ENSMUSP00000056502,10090.ENSMUSP00000078436,10090.ENSMUSP00000103007	Idh3b,Bcat2,Got2,Idh3g,Aadat,Idh2	1.14e-05	0.00012
KEGG	10090	Kid. Cortex	Downregulated	mmu00250	Alanine, aspartate and glutamate metabolism	7	37	10090.ENSMUSP00000021726,10090.ENSMUSP00000034097,10090.ENSMUSP00000043821,10090.ENSMUSP00000063548,10090.ENSMUSP00000083375,10090.ENSMUSP00000099904,10090.ENSMUSP00000124579	Adssl1,Got2,Aldh4a1,Abat,Glul,Ass1,Asl	2.81e-05	0.00029
KEGG	10090	Kid. Cortex	Downregulated	mmu00620	Pyruvate metabolism	7	39	10090.ENSMUSP00000022268,10090.ENSMUSP00000027810,10090.ENSMUSP00000033662,10090.ENSMUSP00000034567,10090.ENSMUSP00000065089,10090.ENSMUSP00000099642,10090.ENSMUSP00000106481	Pdhb,Fh1,Pdha1,Dlat,Aldh7a1,Acacb,Dld	3.79e-05	0.00038
KEGG	10090	Kid. Cortex	Downregulated	mmu04976	Bile secretion	10	98	10090.ENSMUSP00000004774,10090.ENSMUSP00000023835,10090.ENSMUSP00000027863,10090.ENSMUSP00000035429,10090.ENSMUSP00000038142,10090.ENSMUSP00000039657,10090.ENSMUSP00000083077,10090.ENSMUSP00000084234,10090.ENSMUSP00000099770,10090.ENSMUSP00000121744	Aqp1,Slc10a2,Atp1b1,Fxyd2,Slc9a3,Atp1a1,Atp1a2,Slc22a7,Abcb11,Slc4a4	7.39e-05	0.00072
KEGG	10090	Kid. Cortex	Downregulated	mmu04146	Peroxisome	9	85	10090.ENSMUSP00000007012,10090.ENSMUSP00000030432,10090.ENSMUSP00000031897,10090.ENSMUSP00000034046,10090.ENSMUSP00000037929,10090.ENSMUSP00000042351,10090.ENSMUSP00000103007,10090.ENSMUSP00000104533,10090.ENSMUSP00000144119	Sod2,Hmgcl,Gstk1,Acsl1,Mpv17l2,Acaa1a,Idh2,Acsl6,Mpv17	0.00013	0.0012
KEGG	10090	Kid. Cortex	Downregulated	mmu00072	Synthesis and degradation of ketone bodies	4	12	10090.ENSMUSP00000030432,10090.ENSMUSP00000099708,10090.ENSMUSP00000106318,10090.ENSMUSP00000110882	Hmgcl,Oxct2b,Oxct1,Bdh1	0.00026	0.0023
KEGG	10090	Kid. Cortex	Downregulated	mmu04721	Synaptic vesicle cycle	8	73	10090.ENSMUSP00000004396,10090.ENSMUSP00000006431,10090.ENSMUSP00000019354,10090.ENSMUSP00000020884,10090.ENSMUSP00000021536,10090.ENSMUSP00000029900,10090.ENSMUSP00000040756,10090.ENSMUSP00000069529	Atp6v1f,Atp6v1b1,Atp6v1e1,Atp6v1c2,Atp6v1d,Atp6v0d2,Atp6v1h,Stx3	0.00025	0.0023
KEGG	10090	Kid. Cortex	Downregulated	mmu00310	Lysine degradation	7	61	10090.ENSMUSP00000026538,10090.ENSMUSP00000029610,10090.ENSMUSP00000065089,10090.ENSMUSP00000078436,10090.ENSMUSP00000092769,10090.ENSMUSP00000106481,10090.ENSMUSP00000120976	Echs1,Hadh,Aldh7a1,Aadat,Dhtkd1,Dld,Hadha	0.00047	0.0041
KEGG	10090	Kid. Cortex	Downregulated	mmu04973	Carbohydrate digestion and absorption	6	45	10090.ENSMUSP00000020277,10090.ENSMUSP00000027863,10090.ENSMUSP00000035429,10090.ENSMUSP00000039657,10090.ENSMUSP00000071466,10090.ENSMUSP00000083077	Hkdc1,Atp1b1,Fxyd2,Atp1a1,Mgam,Atp1a2	0.00058	0.0049
KEGG	10090	Kid. Cortex	Downregulated	mmu00500	Starch and sucrose metabolism	5	31	10090.ENSMUSP00000020169,10090.ENSMUSP00000020277,10090.ENSMUSP00000032371,10090.ENSMUSP00000071231,10090.ENSMUSP00000071466	Enpp3,Hkdc1,Gys2,Pygl,Mgam	0.00077	0.0064
KEGG	10090	Kid. Cortex	Downregulated	mmu04022	cGMP-PKG signaling pathway	11	166	10090.ENSMUSP00000025910,10090.ENSMUSP00000027863,10090.ENSMUSP00000034049,10090.ENSMUSP00000035429,10090.ENSMUSP00000039657,10090.ENSMUSP00000069011,10090.ENSMUSP00000083077,10090.ENSMUSP00000088723,10090.ENSMUSP00000099819,10090.ENSMUSP00000119242,10090.ENSMUSP00000132809	Bad,Atp1b1,Slc25a4,Fxyd2,Atp1a1,Pde5a,Atp1a2,Slc25a31,Vdac1,Atp2b4,Slc8a1	0.0011	0.0086
KEGG	10090	Kid. Cortex	Downregulated	mmu00220	Arginine biosynthesis	4	20	10090.ENSMUSP00000034097,10090.ENSMUSP00000083375,10090.ENSMUSP00000099904,10090.ENSMUSP00000124579	Got2,Glul,Ass1,Asl	0.0013	0.0104
KEGG	10090	Kid. Cortex	Downregulated	mmu00360	Phenylalanine metabolism	4	22	10090.ENSMUSP00000020241,10090.ENSMUSP00000031398,10090.ENSMUSP00000034097,10090.ENSMUSP00000090607	Pah,Hpd,Got2,Gm4952	0.0018	0.0138
KEGG	10090	Kid. Cortex	Downregulated	mmu04972	Pancreatic secretion	8	106	10090.ENSMUSP00000009689,10090.ENSMUSP00000027863,10090.ENSMUSP00000035429,10090.ENSMUSP00000039657,10090.ENSMUSP00000083077,10090.ENSMUSP00000119242,10090.ENSMUSP00000121744,10090.ENSMUSP00000129163	Kcnq1,Atp1b1,Fxyd2,Atp1a1,Atp1a2,Atp2b4,Slc4a4,Rab11a	0.0024	0.0179
KEGG	10090	Kid. Cortex	Downregulated	mmu04974	Protein digestion and absorption	8	106	10090.ENSMUSP00000009689,10090.ENSMUSP00000022048,10090.ENSMUSP00000027863,10090.ENSMUSP00000035429,10090.ENSMUSP00000038142,10090.ENSMUSP00000039657,10090.ENSMUSP00000083077,10090.ENSMUSP00000132809	Kcnq1,Slc6a19,Atp1b1,Fxyd2,Slc9a3,Atp1a1,Atp1a2,Slc8a1	0.0024	0.0179
KEGG	10090	Kid. Cortex	Downregulated	mmu05323	Rheumatoid arthritis	7	84	10090.ENSMUSP00000004396,10090.ENSMUSP00000006431,10090.ENSMUSP00000019354,10090.ENSMUSP00000020884,10090.ENSMUSP00000021536,10090.ENSMUSP00000029900,10090.ENSMUSP00000040756	Atp6v1f,Atp6v1b1,Atp6v1e1,Atp6v1c2,Atp6v1d,Atp6v0d2,Atp6v1h	0.0026	0.0189
KEGG	10090	Kid. Cortex	Downregulated	mmu04971	Gastric acid secretion	6	69	10090.ENSMUSP00000009689,10090.ENSMUSP00000027863,10090.ENSMUSP00000039657,10090.ENSMUSP00000054356,10090.ENSMUSP00000083077,10090.ENSMUSP00000136382	Kcnq1,Atp1b1,Atp1a1,Kcnj10,Atp1a2,Kcnj16	0.0043	0.0304
KEGG	10090	Kid. Cortex	Downregulated	mmu04920	Adipocytokine signaling pathway	6	71	10090.ENSMUSP00000018710,10090.ENSMUSP00000034046,10090.ENSMUSP00000067046,10090.ENSMUSP00000099642,10090.ENSMUSP00000104533,10090.ENSMUSP00000104936	Slc2a4,Acsl1,Lep,Acacb,Acsl6,Cpt1b	0.0049	0.0338
KEGG	10090	Kid. Cortex	Downregulated	mmu00270	Cysteine and methionine metabolism	5	50	10090.ENSMUSP00000031594,10090.ENSMUSP00000033098,10090.ENSMUSP00000034097,10090.ENSMUSP00000101825,10090.ENSMUSP00000110897	Sdsl,Bcat2,Got2,Kyat3,Ahcyl2	0.0052	0.0353
KEGG	10090	Kid. Cortex	Downregulated	mmu04918	Thyroid hormone synthesis	6	73	10090.ENSMUSP00000001253,10090.ENSMUSP00000027863,10090.ENSMUSP00000035429,10090.ENSMUSP00000039657,10090.ENSMUSP00000079752,10090.ENSMUSP00000083077	Slc26a4,Atp1b1,Fxyd2,Atp1a1,Lrp2,Atp1a2	0.0055	0.0368
KEGG	10090	Kid. Cortex	Downregulated	mmu00290	Valine, leucine and isoleucine biosynthesis	2	4	10090.ENSMUSP00000031594,10090.ENSMUSP00000033098	Sdsl,Bcat2	0.0059	0.0384
KEGG	10090	Kid. Cortex	Downregulated	mmu00330	Arginine and proline metabolism	5	52	10090.ENSMUSP00000000317,10090.ENSMUSP00000003620,10090.ENSMUSP00000034097,10090.ENSMUSP00000043821,10090.ENSMUSP00000065089	Ckmt1,Prodh,Got2,Aldh4a1,Aldh7a1	0.0061	0.0387
KEGG	10090	Kid. Cortex	Downregulated	mmu04922	Glucagon signaling pathway	7	99	10090.ENSMUSP00000020768,10090.ENSMUSP00000022268,10090.ENSMUSP00000032371,10090.ENSMUSP00000033662,10090.ENSMUSP00000071231,10090.ENSMUSP00000099642,10090.ENSMUSP00000104936	Pgam2,Pdhb,Gys2,Pdha1,Pygl,Acacb,Cpt1b	0.0061	0.0387
KEGG	10090	Kid. Cortex	Downregulated	mmu00040	Pentose and glucuronate interconversions	4	34	10090.ENSMUSP00000026144,10090.ENSMUSP00000030455,10090.ENSMUSP00000077899,10090.ENSMUSP00000106180	Dcxr,Akr1a1,Kl,Sord	0.0073	0.0449
KEGG	10090	Duodenum	Upregulated	mmu04972	Pancreatic secretion	18	106	10090.ENSMUSP00000011607,10090.ENSMUSP00000026081,10090.ENSMUSP00000028161,10090.ENSMUSP00000031093,10090.ENSMUSP00000031806,10090.ENSMUSP00000031913,10090.ENSMUSP00000034368,10090.ENSMUSP00000034435,10090.ENSMUSP00000045465,10090.ENSMUSP00000056377,10090.ENSMUSP00000065393,10090.ENSMUSP00000070368,10090.ENSMUSP00000071976,10090.ENSMUSP00000093702,10090.ENSMUSP00000093771,10090.ENSMUSP00000099539…	Cpb1,Pnliprp2,Cel,Cckar,Cpa1,Try4,Ctrl,Ctrb1,Pnliprp1,Pnlip,Prss2,Amy1,Try10,Prss3,Cpa2,Cela2a,Cela3b,Rab27b	2.81e-14	9.32e-12
KEGG	10090	Duodenum	Upregulated	mmu03060	Protein export	9	25	10090.ENSMUSP00000009693,10090.ENSMUSP00000029256,10090.ENSMUSP00000034541,10090.ENSMUSP00000035157,10090.ENSMUSP00000098648,10090.ENSMUSP00000100046,10090.ENSMUSP00000106336,10090.ENSMUSP00000136527,10090.ENSMUSP00000151681	Srp14,Sec62,Srpr,Srprb,Srp72,Sec61a2,Srp54b,Spcs3,Srp54c	3.11e-10	5.15e-08
KEGG	10090	Duodenum	Upregulated	mmu04974	Protein digestion and absorption	11	106	10090.ENSMUSP00000011607,10090.ENSMUSP00000031806,10090.ENSMUSP00000031913,10090.ENSMUSP00000034368,10090.ENSMUSP00000034435,10090.ENSMUSP00000065393,10090.ENSMUSP00000071976,10090.ENSMUSP00000093702,10090.ENSMUSP00000093771,10090.ENSMUSP00000099539,10090.ENSMUSP00000099581	Cpb1,Cpa1,Try4,Ctrl,Ctrb1,Prss2,Try10,Prss3,Cpa2,Cela2a,Cela3b	3.12e-07	3.45e-05
KEGG	10090	Duodenum	Upregulated	mmu03010	Ribosome	11	126	10090.ENSMUSP00000044497,10090.ENSMUSP00000048469,10090.ENSMUSP00000054490,10090.ENSMUSP00000058368,10090.ENSMUSP00000080354,10090.ENSMUSP00000080854,10090.ENSMUSP00000081474,10090.ENSMUSP00000104068,10090.ENSMUSP00000115722,10090.ENSMUSP00000117461,10090.ENSMUSP00000129072	Mrpl34,Rpl10a,Rps23,Rpl18a,Rpl3,Rpl5,Rplp2,Rps19,Rpl13a,Rpl12,Rpl26	1.52e-06	0.00013
KEGG	10090	Duodenum	Upregulated	mmu01100	Metabolic pathways	39	1534	10090.ENSMUSP00000006508,10090.ENSMUSP00000006544,10090.ENSMUSP00000007449,10090.ENSMUSP00000020241,10090.ENSMUSP00000020298,10090.ENSMUSP00000023432,10090.ENSMUSP00000024706,10090.ENSMUSP00000024932,10090.ENSMUSP00000026081,10090.ENSMUSP00000026495,10090.ENSMUSP00000028161,10090.ENSMUSP00000028554,10090.ENSMUSP00000030817,10090.ENSMUSP00000031707,10090.ENSMUSP00000034136,10090.ENSMUSP00000034903…	Ggt1,Gcat,Akr1b7,Pah,Pcbd1,Nit2,Pla2g7,Atp6v0c,Pnliprp2,Atp5a1,Cel,Lpcat4,Car6,Aass,Gpt2,Gsta4,Gstp2,Pnliprp1,Dpagt1,Pnlip,Car8,B4galt6,Amy1,Ampd2,mt-Nd5,Alg10b,Kyat3,Galnt5,Kyat1,Stt3a,Sgms1,Impdh1,Gstp1,Large2,Mgat4c,Pigb,Ldha,Adpgk,Fech	5.05e-05	0.0034
KEGG	10090	Duodenum	Upregulated	mmu04975	Fat digestion and absorption	5	41	10090.ENSMUSP00000025062,10090.ENSMUSP00000026081,10090.ENSMUSP00000028161,10090.ENSMUSP00000045465,10090.ENSMUSP00000056377	Clps,Pnliprp2,Cel,Pnliprp1,Pnlip	0.00029	0.0161
KEGG	10090	Duodenum	Upregulated	mmu00790	Folate biosynthesis	4	25	10090.ENSMUSP00000007449,10090.ENSMUSP00000020241,10090.ENSMUSP00000020298,10090.ENSMUSP00000095843	Akr1b7,Pah,Pcbd1,Ggh	0.00048	0.0226
KEGG	10090	Duodenum	Upregulated	mmu04141	Protein processing in endoplasmic reticulum	9	169	10090.ENSMUSP00000021864,10090.ENSMUSP00000027068,10090.ENSMUSP00000029256,10090.ENSMUSP00000034093,10090.ENSMUSP00000100046,10090.ENSMUSP00000113116,10090.ENSMUSP00000114843,10090.ENSMUSP00000124201,10090.ENSMUSP00000131386	Ssr1,Tram1,Sec62,Eif2ak3,Sec61a2,Stt3a,Syvn1,Herpud1,Ssr4	0.00048	0.0226
KEGG	10090	Erythrocytes	Upregulated	mmu00020	Citrate cycle (TCA cycle)	9	32	10090.ENSMUSP00000005826,10090.ENSMUSP00000027810,10090.ENSMUSP00000033662,10090.ENSMUSP00000034567,10090.ENSMUSP00000063825,10090.ENSMUSP00000099938,10090.ENSMUSP00000106481,10090.ENSMUSP00000123765,10090.ENSMUSP00000144827	Cs,Fh1,Pdha1,Dlat,Pcx,Mdh1,Dld,Sucla2,Suclg2	1.06e-08	3.51e-06
KEGG	10090	Erythrocytes	Upregulated	mmu01200	Carbon metabolism	14	122	10090.ENSMUSP00000005826,10090.ENSMUSP00000011896,10090.ENSMUSP00000027810,10090.ENSMUSP00000031524,10090.ENSMUSP00000031594,10090.ENSMUSP00000033662,10090.ENSMUSP00000034264,10090.ENSMUSP00000034567,10090.ENSMUSP00000063825,10090.ENSMUSP00000099938,10090.ENSMUSP00000106481,10090.ENSMUSP00000109628,10090.ENSMUSP00000123765,10090.ENSMUSP00000144827	Cs,Pgam1,Fh1,Acads,Sdsl,Pdha1,Pgls,Dlat,Pcx,Mdh1,Dld,Rpe,Sucla2,Suclg2	2.76e-08	4.58e-06
KEGG	10090	Erythrocytes	Upregulated	mmu00620	Pyruvate metabolism	7	39	10090.ENSMUSP00000027810,10090.ENSMUSP00000032373,10090.ENSMUSP00000033662,10090.ENSMUSP00000034567,10090.ENSMUSP00000063825,10090.ENSMUSP00000099938,10090.ENSMUSP00000106481	Fh1,Ldhb,Pdha1,Dlat,Pcx,Mdh1,Dld	6.46e-06	0.00071
KEGG	10090	Erythrocytes	Upregulated	mmu05014	Amyotrophic lateral sclerosis	19	362	10090.ENSMUSP00000003121,10090.ENSMUSP00000005923,10090.ENSMUSP00000014438,10090.ENSMUSP00000014913,10090.ENSMUSP00000026743,10090.ENSMUSP00000033093,10090.ENSMUSP00000033176,10090.ENSMUSP00000035486,10090.ENSMUSP00000041968,10090.ENSMUSP00000050191,10090.ENSMUSP00000064699,10090.ENSMUSP00000066035,10090.ENSMUSP00000081142,10090.ENSMUSP00000097254,10090.ENSMUSP00000098295,10090.ENSMUSP00000107595…	Rab8a,Psmb4,Ndufa2,Psmb1,Uqcrc1,Bax,Uqcrc2,Ccs,Psmd7,Ubqln1,Vapb,Anxa7,Tardbp,Nrbf2,Psmd9,Hnrnpa3,Atp5c1,Nos1,Rab1a	8.96e-06	0.00074
KEGG	10090	Erythrocytes	Upregulated	mmu01100	Metabolic pathways	47	1534	10090.ENSMUSP00000004396,10090.ENSMUSP00000005826,10090.ENSMUSP00000005829,10090.ENSMUSP00000006611,10090.ENSMUSP00000006912,10090.ENSMUSP00000011896,10090.ENSMUSP00000014438,10090.ENSMUSP00000015234,10090.ENSMUSP00000016105,10090.ENSMUSP00000019354,10090.ENSMUSP00000022517,10090.ENSMUSP00000025925,10090.ENSMUSP00000026743,10090.ENSMUSP00000027810,10090.ENSMUSP00000028624,10090.ENSMUSP00000030446…	Atp6v1f,Cs,Ampd3,Srm,Pip4k2a,Pgam1,Ndufa2,Ptgds,Adss,Atp6v1e1,Cryl1,Plaat3,Uqcrc1,Fh1,Gatm,Urod,Akr1a1,Pi4k2b,Acads,Sdsl,Ldhb,Uqcrc2,Pdha1,Pgls,Dlat,Gsta4,Gclc,Atp6v1h,Hpse,Pcx,Gnpda1,Mdh1,Anpep,Pla2g4c,Sord,Dld,Rpe,Atp6v1a,Hadhb,Atp5c1,Synj1,Pank2,Nos1,Sucla2,Inpp5d,Prdx6b,Suclg2	1.32e-05	0.00088
KEGG	10090	Erythrocytes	Upregulated	mmu03050	Proteasome	6	46	10090.ENSMUSP00000005923,10090.ENSMUSP00000014913,10090.ENSMUSP00000019470,10090.ENSMUSP00000034369,10090.ENSMUSP00000041968,10090.ENSMUSP00000098295	Psmb4,Psmb1,Psme3,Psmb10,Psmd7,Psmd9	0.00015	0.0082
KEGG	10090	Erythrocytes	Upregulated	mmu00640	Propanoate metabolism	5	34	10090.ENSMUSP00000031524,10090.ENSMUSP00000032373,10090.ENSMUSP00000106481,10090.ENSMUSP00000123765,10090.ENSMUSP00000144827	Acads,Ldhb,Dld,Sucla2,Suclg2	0.00033	0.0154
KEGG	10090	Erythrocytes	Upregulated	mmu00010	Glycolysis / Gluconeogenesis	6	65	10090.ENSMUSP00000011896,10090.ENSMUSP00000030455,10090.ENSMUSP00000032373,10090.ENSMUSP00000033662,10090.ENSMUSP00000034567,10090.ENSMUSP00000106481	Pgam1,Akr1a1,Ldhb,Pdha1,Dlat,Dld	0.00082	0.0339
KEGG	10090	Erythrocytes	Downregulated	mmu04610	Complement and coagulation cascades	5	91	10090.ENSMUSP00000014578,10090.ENSMUSP00000029771,10090.ENSMUSP00000072652,10090.ENSMUSP00000077909,10090.ENSMUSP00000139941	Plg,F3,Serpina1a,Serpina1d,Serpina1b	1.09e-06	0.00036
KEGG	10090	Heart	Upregulated	mmu00983	Drug metabolism - other enzymes	7	90	10090.ENSMUSP00000022915,10090.ENSMUSP00000034346,10090.ENSMUSP00000034355,10090.ENSMUSP00000060202,10090.ENSMUSP00000092233,10090.ENSMUSP00000102296,10090.ENSMUSP00000108763	Dpys,Ces2a,Ces2e,Uck2,Ugt2b36,Gstm6,Ugt1a6b	5.51e-05	0.0183
KEGG	10090	Heart	Downregulated	mmu05012	Parkinson disease	11	238	10090.ENSMUSP00000000175,10090.ENSMUSP00000023085,10090.ENSMUSP00000027974,10090.ENSMUSP00000034881,10090.ENSMUSP00000038150,10090.ENSMUSP00000080993,10090.ENSMUSP00000080996,10090.ENSMUSP00000081001,10090.ENSMUSP00000081003,10090.ENSMUSP00000099702,10090.ENSMUSP00000118333	Sdhd,Ndufa6,Atf6,Cox7a2,Itpr3,mt-Co1,mt-Atp6,mt-Nd5,mt-Cytb,Ube2l6,Ube2j1	7.32e-07	0.00024
KEGG	10090	Heart	Downregulated	mmu01100	Metabolic pathways	27	1534	10090.ENSMUSP00000000175,10090.ENSMUSP00000004134,10090.ENSMUSP00000013807,10090.ENSMUSP00000019382,10090.ENSMUSP00000022901,10090.ENSMUSP00000023085,10090.ENSMUSP00000028005,10090.ENSMUSP00000029078,10090.ENSMUSP00000031195,10090.ENSMUSP00000034396,10090.ENSMUSP00000034881,10090.ENSMUSP00000035260,10090.ENSMUSP00000040356,10090.ENSMUSP00000045272,10090.ENSMUSP00000047393,10090.ENSMUSP00000079692…	Sdhd,Gstm5,Pten,Tecr,Rrm2b,Ndufa6,Mgst3,Car2,Ugt2a3,Mtmr2,Cox7a2,Pomt2,Hgsnat,Alg3,Bpgm,Pfkfb1,mt-Co1,mt-Atp6,mt-Nd5,mt-Cytb,Pgap1,Pld2,Acsl6,Pank2,Dad1,Ash1l,Pomgnt2	2.59e-06	0.00043
KEGG	10090	Heart	Downregulated	mmu00190	Oxidative phosphorylation	7	130	10090.ENSMUSP00000000175,10090.ENSMUSP00000023085,10090.ENSMUSP00000034881,10090.ENSMUSP00000080993,10090.ENSMUSP00000080996,10090.ENSMUSP00000081001,10090.ENSMUSP00000081003	Sdhd,Ndufa6,Cox7a2,mt-Co1,mt-Atp6,mt-Nd5,mt-Cytb	3.23e-05	0.0036
KEGG	10090	Heart	Downregulated	mmu05020	Prion disease	9	263	10090.ENSMUSP00000000175,10090.ENSMUSP00000023085,10090.ENSMUSP00000034881,10090.ENSMUSP00000038150,10090.ENSMUSP00000074922,10090.ENSMUSP00000080993,10090.ENSMUSP00000080996,10090.ENSMUSP00000081001,10090.ENSMUSP00000081003	Sdhd,Ndufa6,Cox7a2,Itpr3,Cav3,mt-Co1,mt-Atp6,mt-Nd5,mt-Cytb	7.49e-05	0.0062
KEGG	10090	Heart	Downregulated	mmu04714	Thermogenesis	8	225	10090.ENSMUSP00000000175,10090.ENSMUSP00000023085,10090.ENSMUSP00000034881,10090.ENSMUSP00000080993,10090.ENSMUSP00000080996,10090.ENSMUSP00000081001,10090.ENSMUSP00000081003,10090.ENSMUSP00000104533	Sdhd,Ndufa6,Cox7a2,mt-Co1,mt-Atp6,mt-Nd5,mt-Cytb,Acsl6	0.00015	0.0098
KEGG	10090	Heart	Downregulated	mmu05010	Alzheimer disease	10	360	10090.ENSMUSP00000000175,10090.ENSMUSP00000023085,10090.ENSMUSP00000027974,10090.ENSMUSP00000033939,10090.ENSMUSP00000034881,10090.ENSMUSP00000038150,10090.ENSMUSP00000080993,10090.ENSMUSP00000080996,10090.ENSMUSP00000081001,10090.ENSMUSP00000081003	Sdhd,Ndufa6,Atf6,Ikbkb,Cox7a2,Itpr3,mt-Co1,mt-Atp6,mt-Nd5,mt-Cytb	0.00016	0.0098
KEGG	10090	Heart	Downregulated	mmu04260	Cardiac muscle contraction	5	84	10090.ENSMUSP00000034881,10090.ENSMUSP00000034983,10090.ENSMUSP00000080993,10090.ENSMUSP00000081003,10090.ENSMUSP00000093436	Cox7a2,Atp1b3,mt-Co1,mt-Cytb,Trdn	0.00029	0.0138
KEGG	10090	Heart	Downregulated	mmu04610	Complement and coagulation cascades	5	91	10090.ENSMUSP00000022576,10090.ENSMUSP00000029771,10090.ENSMUSP00000072652,10090.ENSMUSP00000077909,10090.ENSMUSP00000139941	Cpb2,F3,Serpina1a,Serpina1d,Serpina1b	0.00041	0.0171
KEGG	10090	Heart	Downregulated	mmu04932	Non-alcoholic fatty liver disease	6	147	10090.ENSMUSP00000000175,10090.ENSMUSP00000023085,10090.ENSMUSP00000033939,10090.ENSMUSP00000034881,10090.ENSMUSP00000080993,10090.ENSMUSP00000081003	Sdhd,Ndufa6,Ikbkb,Cox7a2,mt-Co1,mt-Cytb	0.0005	0.0185
KEGG	10090	Heart	Downregulated	mmu05014	Amyotrophic lateral sclerosis	9	362	10090.ENSMUSP00000000175,10090.ENSMUSP00000023085,10090.ENSMUSP00000027974,10090.ENSMUSP00000034881,10090.ENSMUSP00000038150,10090.ENSMUSP00000080993,10090.ENSMUSP00000080996,10090.ENSMUSP00000081001,10090.ENSMUSP00000081003	Sdhd,Ndufa6,Atf6,Cox7a2,Itpr3,mt-Co1,mt-Atp6,mt-Nd5,mt-Cytb	0.00074	0.0245
KEGG	10090	Ileum	Downregulated	mmu04610	Complement and coagulation cascades	15	91	10090.ENSMUSP00000014578,10090.ENSMUSP00000021948,10090.ENSMUSP00000022576,10090.ENSMUSP00000023450,10090.ENSMUSP00000024988,10090.ENSMUSP00000026907,10090.ENSMUSP00000029771,10090.ENSMUSP00000033941,10090.ENSMUSP00000048704,10090.ENSMUSP00000056836,10090.ENSMUSP00000072652,10090.ENSMUSP00000077909,10090.ENSMUSP00000080938,10090.ENSMUSP00000139941,10090.ENSMUSP00000153147	Plg,F12,Cpb2,Serpind1,C3,Klkb1,F3,Plat,Serpinf2,Cfd,Serpina1a,Serpina1d,Cr2,Serpina1b,Mbl1	2.29e-15	7.61e-13
KEGG	10090	Ileum	Downregulated	mmu00480	Glutathione metabolism	9	71	10090.ENSMUSP00000004136,10090.ENSMUSP00000004137,10090.ENSMUSP00000022282,10090.ENSMUSP00000032074,10090.ENSMUSP00000034902,10090.ENSMUSP00000081010,10090.ENSMUSP00000081011,10090.ENSMUSP00000094863,10090.ENSMUSP00000112923	Gstm3,Gstm7,Gpx8,Nat8f5,Gsta2,Gpx1,Gpx3,Gpx4,Mgst1	8.4e-09	1.39e-06
KEGG	10090	Ileum	Downregulated	mmu00983	Drug metabolism - other enzymes	9	90	10090.ENSMUSP00000004136,10090.ENSMUSP00000004137,10090.ENSMUSP00000034189,10090.ENSMUSP00000034902,10090.ENSMUSP00000039429,10090.ENSMUSP00000049315,10090.ENSMUSP00000068282,10090.ENSMUSP00000108763,10090.ENSMUSP00000112923	Gstm3,Gstm7,Ces1c,Gsta2,Dpyd,Ces2g,Ugt2b5,Ugt1a6b,Mgst1	5.55e-08	6.15e-06
KEGG	10090	Ileum	Downregulated	mmu01100	Metabolic pathways	32	1534	10090.ENSMUSP00000001824,10090.ENSMUSP00000003569,10090.ENSMUSP00000004136,10090.ENSMUSP00000004137,10090.ENSMUSP00000019977,10090.ENSMUSP00000022282,10090.ENSMUSP00000023482,10090.ENSMUSP00000023677,10090.ENSMUSP00000025385,10090.ENSMUSP00000025656,10090.ENSMUSP00000025966,10090.ENSMUSP00000027455,10090.ENSMUSP00000030189,10090.ENSMUSP00000032074,10090.ENSMUSP00000034902,10090.ENSMUSP00000038387…	Folh1,Inmt,Gstm3,Gstm7,Ddo,Gpx8,B4galt4,Atp5o,Hsd17b4,Aldh1a7,Cyp2c55,Alppl2,Gba2,Nat8f5,Gsta2,Alg14,Rdh7,Dpyd,Uqcrq,Dpagt1,Acox1,Ldhd,Ugt2b5,Entpd5,Gpx1,Gpx3,Cyp2c66,Gpx4,Hsd3b1,Ugt1a6b,Mgst1,Large2	1.53e-07	1.27e-05
KEGG	10090	Ileum	Downregulated	mmu05204	Chemical carcinogenesis	8	99	10090.ENSMUSP00000004136,10090.ENSMUSP00000004137,10090.ENSMUSP00000025966,10090.ENSMUSP00000034902,10090.ENSMUSP00000068282,10090.ENSMUSP00000084487,10090.ENSMUSP00000108763,10090.ENSMUSP00000112923	Gstm3,Gstm7,Cyp2c55,Gsta2,Ugt2b5,Cyp2c66,Ugt1a6b,Mgst1	1.4e-06	9.29e-05
KEGG	10090	Ileum	Downregulated	mmu04918	Thyroid hormone synthesis	7	73	10090.ENSMUSP00000019896,10090.ENSMUSP00000022282,10090.ENSMUSP00000031314,10090.ENSMUSP00000038150,10090.ENSMUSP00000074783,10090.ENSMUSP00000081010,10090.ENSMUSP00000081011	Iyd,Gpx8,Alb,Itpr3,Ttr,Gpx1,Gpx3	2.26e-06	0.00013
KEGG	10090	Ileum	Downregulated	mmu00980	Metabolism of xenobiotics by cytochrome P450	6	72	10090.ENSMUSP00000004136,10090.ENSMUSP00000004137,10090.ENSMUSP00000034902,10090.ENSMUSP00000068282,10090.ENSMUSP00000108763,10090.ENSMUSP00000112923	Gstm3,Gstm7,Gsta2,Ugt2b5,Ugt1a6b,Mgst1	2.58e-05	0.0011
KEGG	10090	Ileum	Downregulated	mmu00982	Drug metabolism - cytochrome P450	6	70	10090.ENSMUSP00000004136,10090.ENSMUSP00000004137,10090.ENSMUSP00000034902,10090.ENSMUSP00000068282,10090.ENSMUSP00000108763,10090.ENSMUSP00000112923	Gstm3,Gstm7,Gsta2,Ugt2b5,Ugt1a6b,Mgst1	2.22e-05	0.0011
KEGG	10090	Ileum	Downregulated	mmu00140	Steroid hormone biosynthesis	6	86	10090.ENSMUSP00000006094,10090.ENSMUSP00000025966,10090.ENSMUSP00000068282,10090.ENSMUSP00000084487,10090.ENSMUSP00000102630,10090.ENSMUSP00000108763	Cyp2d26,Cyp2c55,Ugt2b5,Cyp2c66,Hsd3b1,Ugt1a6b	6.57e-05	0.0024
KEGG	10090	Ileum	Downregulated	mmu00830	Retinol metabolism	6	92	10090.ENSMUSP00000025656,10090.ENSMUSP00000025966,10090.ENSMUSP00000039252,10090.ENSMUSP00000068282,10090.ENSMUSP00000084487,10090.ENSMUSP00000108763	Aldh1a7,Cyp2c55,Rdh7,Ugt2b5,Cyp2c66,Ugt1a6b	9.35e-05	0.0031
KEGG	10090	Ileum	Downregulated	mmu04216	Ferroptosis	4	40	10090.ENSMUSP00000035158,10090.ENSMUSP00000092002,10090.ENSMUSP00000094863,10090.ENSMUSP00000158539	Trf,Ftl1,Gpx4,Fth1	0.00032	0.0097
KEGG	10090	Ileum	Downregulated	mmu00590	Arachidonic acid metabolism	5	87	10090.ENSMUSP00000022282,10090.ENSMUSP00000025966,10090.ENSMUSP00000081010,10090.ENSMUSP00000081011,10090.ENSMUSP00000084487	Gpx8,Cyp2c55,Gpx1,Gpx3,Cyp2c66	0.00063	0.0175
KEGG	10090	Ileum	Downregulated	mmu04640	Hematopoietic cell lineage	5	90	10090.ENSMUSP00000005678,10090.ENSMUSP00000014743,10090.ENSMUSP00000080938,10090.ENSMUSP00000126422,10090.ENSMUSP00000145803	Fcer2a,Csf1,Cr2,Ms4a1,Cd19	0.00073	0.0187
KEGG	10090	Ileum	Downregulated	mmu05418	Fluid shear stress and atherosclerosis	6	142	10090.ENSMUSP00000004136,10090.ENSMUSP00000004137,10090.ENSMUSP00000033941,10090.ENSMUSP00000034902,10090.ENSMUSP00000067305,10090.ENSMUSP00000112923	Gstm3,Gstm7,Plat,Gsta2,Acvr2a,Mgst1	0.00086	0.0204
KEGG	10090	Ileum	Downregulated	mmu05150	Staphylococcus aureus infection	5	108	10090.ENSMUSP00000007280,10090.ENSMUSP00000014578,10090.ENSMUSP00000024988,10090.ENSMUSP00000056836,10090.ENSMUSP00000153147	Krt16,Plg,C3,Cfd,Mbl1	0.0016	0.0352
KEGG	10090	Jejunum	Downregulated	mmu04610	Complement and coagulation cascades	7	91	10090.ENSMUSP00000021948,10090.ENSMUSP00000029771,10090.ENSMUSP00000048704,10090.ENSMUSP00000048836,10090.ENSMUSP00000072652,10090.ENSMUSP00000077909,10090.ENSMUSP00000139941	F12,F3,Serpinf2,C1qa,Serpina1a,Serpina1d,Serpina1b	5.6e-06	0.0019
KEGG	10090	Jejunum	Downregulated	mmu04972	Pancreatic secretion	7	106	10090.ENSMUSP00000001921,10090.ENSMUSP00000031806,10090.ENSMUSP00000038150,10090.ENSMUSP00000071976,10090.ENSMUSP00000093771,10090.ENSMUSP00000098796,10090.ENSMUSP00000132528	Cpa3,Cpa1,Itpr3,Try10,Cpa2,Bst1,Adcy7	1.43e-05	0.0024
KEGG	10090	Jejunum	Downregulated	mmu04978	Mineral absorption	5	51	10090.ENSMUSP00000035158,10090.ENSMUSP00000092002,10090.ENSMUSP00000092380,10090.ENSMUSP00000104485,10090.ENSMUSP00000155442	Trf,Ftl1,Slc34a2,Atox1,Slc39a4	4.38e-05	0.0048
KEGG	10090	Jejunum	Downregulated	mmu04976	Bile secretion	6	98	10090.ENSMUSP00000026208,10090.ENSMUSP00000031822,10090.ENSMUSP00000041204,10090.ENSMUSP00000047551,10090.ENSMUSP00000072803,10090.ENSMUSP00000132528	Abcc2,Abcg2,Abcb1a,Ephx1,Ugt1a1,Adcy7	8.9e-05	0.0074
KEGG	10090	Jejunum	Downregulated	mmu04918	Thyroid hormone synthesis	5	73	10090.ENSMUSP00000031314,10090.ENSMUSP00000038150,10090.ENSMUSP00000074783,10090.ENSMUSP00000081010,10090.ENSMUSP00000132528	Alb,Itpr3,Ttr,Gpx1,Adcy7	0.00021	0.0142
KEGG	10090	Liver	Upregulated	mmu04670	Leukocyte transendothelial migration	7	113	10090.ENSMUSP00000000299,10090.ENSMUSP00000034296,10090.ENSMUSP00000062045,10090.ENSMUSP00000068468,10090.ENSMUSP00000094084,10090.ENSMUSP00000101315,10090.ENSMUSP00000140404	Itgb2,Pik3r2,Cldn14,Itgam,Ncf4,Pik3cd,Ncf2	0.0001	0.0345
KEGG	10090	Liver	Downregulated	mmu01100	Metabolic pathways	32	1534	10090.ENSMUSP00000000317,10090.ENSMUSP00000005669,10090.ENSMUSP00000014389,10090.ENSMUSP00000023805,10090.ENSMUSP00000025656,10090.ENSMUSP00000028148,10090.ENSMUSP00000028944,10090.ENSMUSP00000029076,10090.ENSMUSP00000031081,10090.ENSMUSP00000032073,10090.ENSMUSP00000032074,10090.ENSMUSP00000034903,10090.ENSMUSP00000046601,10090.ENSMUSP00000061646,10090.ENSMUSP00000063895,10090.ENSMUSP00000076433…	Ckmt1,Cyp2b13,Pigl,Csad,Aldh1a7,Fpgs,Acss1,Car3,Pi4k2b,Nat8,Nat8f5,Gsta4,Pde1c,Crppa,Nanp,Ethe1,Gpx1,Gpx3,Oat,Glul,Camkmt,Nat8f3,Acsm2,Bhmt,Dao,Ugt1a6a,Gmppa,Bdh2,Cth,Fhit,Acot1,Ddc	3.07e-06	0.001
KEGG	10090	Liver	Downregulated	mmu00480	Glutathione metabolism	6	71	10090.ENSMUSP00000032073,10090.ENSMUSP00000032074,10090.ENSMUSP00000034903,10090.ENSMUSP00000081010,10090.ENSMUSP00000081011,10090.ENSMUSP00000093431	Nat8,Nat8f5,Gsta4,Gpx1,Gpx3,Nat8f3	4.97e-05	0.0082
KEGG	10090	Liver	Downregulated	mmu04218	Cellular senescence	8	168	10090.ENSMUSP00000016672,10090.ENSMUSP00000020949,10090.ENSMUSP00000022701,10090.ENSMUSP00000029069,10090.ENSMUSP00000066927,10090.ENSMUSP00000075721,10090.ENSMUSP00000101141,10090.ENSMUSP00000121111	Mapkapk2,Map2k6,Rb1,E2f5,Gata4,Fbxw11,Foxo3,Map2k2	0.00013	0.0148
KEGG	10090	Liver	Downregulated	mmu04614	Renin-angiotensin system	4	36	10090.ENSMUSP00000001963,10090.ENSMUSP00000038103,10090.ENSMUSP00000075429,10090.ENSMUSP00000142205	Ace,Mcpt4,Prcp,Mme	0.00036	0.03
KEGG	10090	Lung	Downregulated	mmu04512	ECM-receptor interaction	8	86	10090.ENSMUSP00000021028,10090.ENSMUSP00000033898,10090.ENSMUSP00000044903,10090.ENSMUSP00000051895,10090.ENSMUSP00000057563,10090.ENSMUSP00000084282,10090.ENSMUSP00000099375,10090.ENSMUSP00000109084	Itgb3,Col4a1,Thbs1,Gp5,Gp1ba,Col4a4,Itga2b,Col4a3	2.28e-05	0.0076
KEGG	10090	Lung	Downregulated	mmu00190	Oxidative phosphorylation	9	130	10090.ENSMUSP00000014438,10090.ENSMUSP00000020372,10090.ENSMUSP00000032882,10090.ENSMUSP00000034881,10090.ENSMUSP00000040138,10090.ENSMUSP00000051222,10090.ENSMUSP00000054856,10090.ENSMUSP00000080991,10090.ENSMUSP00000080993	Ndufa2,Uqcr11,Ndufc2,Cox7a2,Cox10,Atp5k,Uqcr10,mt-Nd1,mt-Co1	6.25e-05	0.0104
KEGG	10090	Lung	Downregulated	mmu01100	Metabolic pathways	37	1534	10090.ENSMUSP00000000329,10090.ENSMUSP00000003017,10090.ENSMUSP00000014438,10090.ENSMUSP00000019382,10090.ENSMUSP00000020372,10090.ENSMUSP00000021652,10090.ENSMUSP00000021907,10090.ENSMUSP00000023007,10090.ENSMUSP00000023214,10090.ENSMUSP00000025925,10090.ENSMUSP00000026568,10090.ENSMUSP00000031594,10090.ENSMUSP00000032413,10090.ENSMUSP00000032882,10090.ENSMUSP00000034197,10090.ENSMUSP00000034561…	Alox12,Tbxas1,Ndufa2,Tecr,Uqcr11,Acot4,Fbp2,Adcy8,Dgat1,Plaat3,Ptdss2,Sdsl,Etnk1,Ndufc2,St3gal2,Alg9,Cox7a2,Scd1,Cox10,Mif,Atp5k,Uqcr10,B4galt7,Nsd2,Csgalnact1,mt-Nd1,mt-Co1,Gda,Ugt2b36,Alg8,Cyp2u1,Dpm3,Il4i1,Selenoi,Pde8b,Mocs2,Acp5	0.00014	0.015
KEGG	10090	Lung	Downregulated	mmu04610	Complement and coagulation cascades	7	91	10090.ENSMUSP00000021948,10090.ENSMUSP00000029771,10090.ENSMUSP00000049729,10090.ENSMUSP00000072652,10090.ENSMUSP00000073695,10090.ENSMUSP00000077909,10090.ENSMUSP00000139941	F12,F3,Masp2,Serpina1a,Serpina1c,Serpina1d,Serpina1b	0.00022	0.0159
KEGG	10090	Lung	Downregulated	mmu04611	Platelet activation	8	120	10090.ENSMUSP00000003017,10090.ENSMUSP00000021028,10090.ENSMUSP00000023007,10090.ENSMUSP00000037858,10090.ENSMUSP00000038150,10090.ENSMUSP00000051895,10090.ENSMUSP00000057563,10090.ENSMUSP00000099375	Tbxas1,Itgb3,Adcy8,Fermt3,Itpr3,Gp5,Gp1ba,Itga2b	0.0002	0.0159
KEGG	10090	Lung	Downregulated	mmu04640	Hematopoietic cell lineage	7	90	10090.ENSMUSP00000021028,10090.ENSMUSP00000025192,10090.ENSMUSP00000032492,10090.ENSMUSP00000033063,10090.ENSMUSP00000051895,10090.ENSMUSP00000057563,10090.ENSMUSP00000099375	Itgb3,H2-Oa,Cd9,Cd37,Gp5,Gp1ba,Itga2b	0.00021	0.0159
KEGG	10090	Lung	Downregulated	mmu04714	Thermogenesis	11	225	10090.ENSMUSP00000014438,10090.ENSMUSP00000020372,10090.ENSMUSP00000023007,10090.ENSMUSP00000032882,10090.ENSMUSP00000034881,10090.ENSMUSP00000040138,10090.ENSMUSP00000051222,10090.ENSMUSP00000054856,10090.ENSMUSP00000069539,10090.ENSMUSP00000080991,10090.ENSMUSP00000080993	Ndufa2,Uqcr11,Adcy8,Ndufc2,Cox7a2,Cox10,Atp5k,Uqcr10,Cpt1c,mt-Nd1,mt-Co1	0.00019	0.0159
KEGG	10090	Lung	Downregulated	mmu05012	Parkinson disease	11	238	10090.ENSMUSP00000014438,10090.ENSMUSP00000016399,10090.ENSMUSP00000020372,10090.ENSMUSP00000024056,10090.ENSMUSP00000032882,10090.ENSMUSP00000034881,10090.ENSMUSP00000038150,10090.ENSMUSP00000054856,10090.ENSMUSP00000080991,10090.ENSMUSP00000080993,10090.ENSMUSP00000099702	Ndufa2,Tubb1,Uqcr11,Ube2j2,Ndufc2,Cox7a2,Itpr3,Uqcr10,mt-Nd1,mt-Co1,Ube2l6	0.0003	0.0159
KEGG	10090	Lung	Downregulated	mmu04974	Protein digestion and absorption	7	106	10090.ENSMUSP00000001921,10090.ENSMUSP00000026045,10090.ENSMUSP00000033898,10090.ENSMUSP00000034368,10090.ENSMUSP00000084282,10090.ENSMUSP00000090227,10090.ENSMUSP00000109084	Cpa3,Col17a1,Col4a1,Ctrl,Col4a4,Slc16a10,Col4a3	0.00054	0.0198
KEGG	10090	Lung	Downregulated	mmu04723	Retrograde endocannabinoid signaling	8	144	10090.ENSMUSP00000014438,10090.ENSMUSP00000023007,10090.ENSMUSP00000032882,10090.ENSMUSP00000038150,10090.ENSMUSP00000046557,10090.ENSMUSP00000047586,10090.ENSMUSP00000080991,10090.ENSMUSP00000121127	Ndufa2,Adcy8,Ndufc2,Itpr3,Gng12,Gngt2,mt-Nd1,Gnb4	0.00065	0.0215
KEGG	10090	Lung	Downregulated	mmu04260	Cardiac muscle contraction	6	84	10090.ENSMUSP00000020372,10090.ENSMUSP00000034881,10090.ENSMUSP00000054856,10090.ENSMUSP00000080993,10090.ENSMUSP00000082459,10090.ENSMUSP00000132512	Uqcr11,Cox7a2,Uqcr10,mt-Co1,Hrc,Cacna2d2	0.00091	0.0275
KEGG	10090	Lung	Downregulated	mmu04926	Relaxin signaling pathway	7	127	10090.ENSMUSP00000023007,10090.ENSMUSP00000033898,10090.ENSMUSP00000046557,10090.ENSMUSP00000047586,10090.ENSMUSP00000084282,10090.ENSMUSP00000109084,10090.ENSMUSP00000121127	Adcy8,Col4a1,Gng12,Gngt2,Col4a4,Col4a3,Gnb4	0.0015	0.0404
KEGG	10090	Kid. Medulla	Upregulated	mmu04610	Complement and coagulation cascades	40	91	10090.ENSMUSP00000000299,10090.ENSMUSP00000014578,10090.ENSMUSP00000017488,10090.ENSMUSP00000022576,10090.ENSMUSP00000022616,10090.ENSMUSP00000023450,10090.ENSMUSP00000023589,10090.ENSMUSP00000023629,10090.ENSMUSP00000023994,10090.ENSMUSP00000024988,10090.ENSMUSP00000025797,10090.ENSMUSP00000027657,10090.ENSMUSP00000028233,10090.ENSMUSP00000028681,10090.ENSMUSP00000029771,10090.ENSMUSP00000031663…	Itgb2,Plg,Vtn,Cpb2,Clu,Serpind1,Kng1,Pros1,Serping1,C3,Mbl2,C4bp,Hc,F2,F3,C8b,C1qc,Fgb,Serpine1,C1qb,C8g,Serpinf2,C1qa,Masp2,Cfd,C1ra,C8a,Itgam,Serpinc1,C4b,Serpina1a,Cfi,Serpina1d,Masp1,Kng2,Serpina1e,C1s1,C5ar1,Serpina1b,Fgg	6.2e-23	2.06e-20
KEGG	10090	Kid. Medulla	Upregulated	mmu05169	Epstein-Barr virus infection	43	214	10090.ENSMUSP00000001780,10090.ENSMUSP00000005218,10090.ENSMUSP00000019997,10090.ENSMUSP00000020157,10090.ENSMUSP00000024742,10090.ENSMUSP00000025161,10090.ENSMUSP00000025181,10090.ENSMUSP00000025197,10090.ENSMUSP00000025867,10090.ENSMUSP00000026416,10090.ENSMUSP00000028062,10090.ENSMUSP00000029623,10090.ENSMUSP00000029812,10090.ENSMUSP00000033093,10090.ENSMUSP00000033617,10090.ENSMUSP00000035687…	Akt1,Cd44,Tnfaip3,Apaf1,Nfkbie,Tapbp,H2-K1,Tap2,Rela,Cdk2,Vim,Tlr2,Nfkb1,Bax,Btk,H2-M3,H2-DMa,H2-Ab1,H2-Aa,Irak4,Oas1a,Plcg2,Oas2,Isg15,Stat2,Ncor2,Icam1,Mapk11,Relb,B2m,Pik3cd,Itgal,Nfkb2,H2-DMb1,Traf2,Syk,Stat3,Cdk6,Tap1,Ripk1,H2-Q10,Stat1,H2-Eb1	5.61e-14	9.32e-12
KEGG	10090	Kid. Medulla	Upregulated	mmu04145	Phagosome	35	162	10090.ENSMUSP00000000299,10090.ENSMUSP00000001513,10090.ENSMUSP00000015484,10090.ENSMUSP00000015667,10090.ENSMUSP00000016094,10090.ENSMUSP00000017604,10090.ENSMUSP00000023128,10090.ENSMUSP00000024988,10090.ENSMUSP00000025181,10090.ENSMUSP00000025197,10090.ENSMUSP00000025797,10090.ENSMUSP00000029623,10090.ENSMUSP00000033824,10090.ENSMUSP00000035687,10090.ENSMUSP00000037088,10090.ENSMUSP00000041008…	Itgb2,Tubb6,Cybb,Ctss,Ncf1,Cyba,Itga5,C3,H2-K1,Tap2,Mbl2,Tlr2,Lamp1,H2-M3,H2-DMa,H2-Ab1,H2-Aa,Cd14,C1ra,Itgam,Itgb5,Tubb3,Tubb2b,Ncf4,Mrc2,Coro1a,Pla2r1,H2-DMb1,Tap1,Fcgr3,H2-Q10,Ncf2,Ctsl,Colec12,H2-Eb1	2.1e-12	2.32e-10
KEGG	10090	Kid. Medulla	Upregulated	mmu05152	Tuberculosis	34	168	10090.ENSMUSP00000000299,10090.ENSMUSP00000001780,10090.ENSMUSP00000015667,10090.ENSMUSP00000016168,10090.ENSMUSP00000020157,10090.ENSMUSP00000024988,10090.ENSMUSP00000025867,10090.ENSMUSP00000029623,10090.ENSMUSP00000029812,10090.ENSMUSP00000033093,10090.ENSMUSP00000033824,10090.ENSMUSP00000037088,10090.ENSMUSP00000041008,10090.ENSMUSP00000046105,10090.ENSMUSP00000056669,10090.ENSMUSP00000068468…	Itgb2,Akt1,Ctss,Lbp,Apaf1,C3,Rela,Tlr2,Nfkb1,Bax,Lamp1,H2-DMa,H2-Ab1,H2-Aa,Cd14,Itgam,Irak4,Plk3,Fcer1g,Mapk11,Cd74,Mrc2,Lsp1,Coro1a,Pla2r1,H2-DMb1,Syk,Rfx5,Ctsd,Sphk1,Fcgr3,Tirap,Stat1,H2-Eb1	2.06e-11	1.71e-09
KEGG	10090	Kid. Medulla	Upregulated	mmu05140	Leishmaniasis	22	66	10090.ENSMUSP00000000299,10090.ENSMUSP00000004377,10090.ENSMUSP00000015484,10090.ENSMUSP00000016094,10090.ENSMUSP00000017604,10090.ENSMUSP00000024988,10090.ENSMUSP00000025867,10090.ENSMUSP00000029623,10090.ENSMUSP00000029812,10090.ENSMUSP00000037088,10090.ENSMUSP00000041008,10090.ENSMUSP00000046105,10090.ENSMUSP00000068468,10090.ENSMUSP00000074471,10090.ENSMUSP00000086204,10090.ENSMUSP00000094084…	Itgb2,Ptpn6,Cybb,Ncf1,Cyba,C3,Rela,Tlr2,Nfkb1,H2-DMa,H2-Ab1,H2-Aa,Itgam,Irak4,Mapk11,Ncf4,Itga4,H2-DMb1,Fcgr3,Ncf2,Stat1,H2-Eb1	2.65e-11	1.76e-09
KEGG	10090	Kid. Medulla	Upregulated	mmu05133	Pertussis	22	73	10090.ENSMUSP00000000299,10090.ENSMUSP00000023128,10090.ENSMUSP00000023994,10090.ENSMUSP00000024988,10090.ENSMUSP00000025867,10090.ENSMUSP00000026062,10090.ENSMUSP00000027015,10090.ENSMUSP00000027657,10090.ENSMUSP00000028233,10090.ENSMUSP00000029812,10090.ENSMUSP00000033056,10090.ENSMUSP00000036747,10090.ENSMUSP00000040246,10090.ENSMUSP00000048836,10090.ENSMUSP00000056669,10090.ENSMUSP00000063707…	Itgb2,Itga5,Serping1,C3,Rela,Casp7,Casp1,C4bp,Hc,Nfkb1,Pycard,C1qc,C1qb,C1qa,Cd14,C1ra,Itgam,C4b,Irak4,Mapk11,C1s1,Tirap	1.34e-10	7.39e-09
KEGG	10090	Kid. Medulla	Upregulated	mmu05150	Staphylococcus aureus infection	26	108	10090.ENSMUSP00000000299,10090.ENSMUSP00000014578,10090.ENSMUSP00000024988,10090.ENSMUSP00000025797,10090.ENSMUSP00000028233,10090.ENSMUSP00000036747,10090.ENSMUSP00000037088,10090.ENSMUSP00000040246,10090.ENSMUSP00000041008,10090.ENSMUSP00000046105,10090.ENSMUSP00000048836,10090.ENSMUSP00000049729,10090.ENSMUSP00000056836,10090.ENSMUSP00000063707,10090.ENSMUSP00000068468,10090.ENSMUSP00000069418…	Itgb2,Plg,C3,Mbl2,Hc,C1qc,H2-DMa,C1qb,H2-Ab1,H2-Aa,C1qa,Masp2,Cfd,C1ra,Itgam,C4b,Cfi,Icam1,Masp1,Itgal,H2-DMb1,C1s1,C5ar1,Fcgr3,Fgg,H2-Eb1	1.93e-10	9.15e-09
KEGG	10090	Kid. Medulla	Upregulated	mmu04142	Lysosome	28	128	10090.ENSMUSP00000003910,10090.ENSMUSP00000005173,10090.ENSMUSP00000010195,10090.ENSMUSP00000015667,10090.ENSMUSP00000016400,10090.ENSMUSP00000018918,10090.ENSMUSP00000021607,10090.ENSMUSP00000022721,10090.ENSMUSP00000023088,10090.ENSMUSP00000023911,10090.ENSMUSP00000030412,10090.ENSMUSP00000032191,10090.ENSMUSP00000032779,10090.ENSMUSP00000033824,10090.ENSMUSP00000033920,10090.ENSMUSP00000034000…	Dnase2a,Sgsh,Hyal1,Ctss,Ctsz,Cd68,Lgmn,Cln5,Naga,Nagpa,Ppt1,Sumf1,Ctsc,Lamp1,Aga,Asah1,Man2b1,Smpd1,Gns,Ap1g2,Slc17a5,Idua,Gaa,Ctsd,Gba,Psap,Ctsl,Gla	2.62e-10	1.09e-08
KEGG	10090	Kid. Medulla	Upregulated	mmu04380	Osteoclast differentiation	24	119	10090.ENSMUSP00000001780,10090.ENSMUSP00000014743,10090.ENSMUSP00000016094,10090.ENSMUSP00000017604,10090.ENSMUSP00000025867,10090.ENSMUSP00000029812,10090.ENSMUSP00000031017,10090.ENSMUSP00000033617,10090.ENSMUSP00000062333,10090.ENSMUSP00000079991,10090.ENSMUSP00000082855,10090.ENSMUSP00000086204,10090.ENSMUSP00000092355,10090.ENSMUSP00000092901,10090.ENSMUSP00000094084,10090.ENSMUSP00000101315…	Akt1,Csf1,Ncf1,Cyba,Rela,Nfkb1,Fosl2,Btk,Tgfbr2,Plcg2,Stat2,Mapk11,Relb,Jund,Ncf4,Pik3cd,Nfkb2,Traf2,Csf1r,Syk,Sirpa,Fcgr3,Ncf2,Stat1	1.93e-08	7.13e-07
KEGG	10090	Kid. Medulla	Upregulated	mmu05164	Influenza A	28	166	10090.ENSMUSP00000000395,10090.ENSMUSP00000001780,10090.ENSMUSP00000014578,10090.ENSMUSP00000018506,10090.ENSMUSP00000020157,10090.ENSMUSP00000025867,10090.ENSMUSP00000027015,10090.ENSMUSP00000028259,10090.ENSMUSP00000029812,10090.ENSMUSP00000033056,10090.ENSMUSP00000033093,10090.ENSMUSP00000034056,10090.ENSMUSP00000037088,10090.ENSMUSP00000041008,10090.ENSMUSP00000046105,10090.ENSMUSP00000074471…	Tmprss2,Akt1,Plg,Kpna2,Apaf1,Rela,Casp1,Ifih1,Nfkb1,Pycard,Bax,Tlr3,H2-DMa,H2-Ab1,H2-Aa,Irak4,Oas1a,Oas2,Pml,Stat2,Rnasel,Icam1,Pik3cd,Tlr7,H2-DMb1,Cdk6,Stat1,H2-Eb1	3.96e-08	1.32e-06
KEGG	10090	Kid. Medulla	Upregulated	mmu04611	Platelet activation	23	120	10090.ENSMUSP00000001780,10090.ENSMUSP00000003017,10090.ENSMUSP00000014290,10090.ENSMUSP00000021141,10090.ENSMUSP00000028681,10090.ENSMUSP00000029635,10090.ENSMUSP00000032561,10090.ENSMUSP00000033617,10090.ENSMUSP00000037858,10090.ENSMUSP00000038150,10090.ENSMUSP00000039472,10090.ENSMUSP00000062864,10090.ENSMUSP00000073268,10090.ENSMUSP00000078875,10090.ENSMUSP00000079991,10090.ENSMUSP00000086204…	Akt1,Tbxas1,Apbb1ip,P2rx1,F2,Gucy1b1,Vasp,Btk,Fermt3,Itpr3,Fgb,Pik3cg,Prkg1,Fcer1g,Plcg2,Mapk11,Pik3cd,Gucy1a2,Syk,Myl12a,Adcy7,Fgg,Gucy1a1	8.57e-08	2.59e-06
KEGG	10090	Kid. Medulla	Upregulated	mmu03030	DNA replication	13	35	10090.ENSMUSP00000000505,10090.ENSMUSP00000006856,10090.ENSMUSP00000023353,10090.ENSMUSP00000023867,10090.ENSMUSP00000027601,10090.ENSMUSP00000028817,10090.ENSMUSP00000059192,10090.ENSMUSP00000061923,10090.ENSMUSP00000099621,10090.ENSMUSP00000099986,10090.ENSMUSP00000117246,10090.ENSMUSP00000126135,10090.ENSMUSP00000136972	Mcm7,Pola1,Mcm4,Rfc2,Mcm6,Pcna,Mcm3,Mcm2,Rpa2,Pold2,Fen1,Mcm5,Lig1	1.11e-07	3.07e-06
KEGG	10090	Kid. Medulla	Upregulated	mmu04612	Antigen processing and presentation	18	75	10090.ENSMUSP00000015667,10090.ENSMUSP00000021607,10090.ENSMUSP00000025161,10090.ENSMUSP00000025181,10090.ENSMUSP00000025197,10090.ENSMUSP00000035687,10090.ENSMUSP00000037088,10090.ENSMUSP00000041008,10090.ENSMUSP00000046105,10090.ENSMUSP00000095171,10090.ENSMUSP00000099534,10090.ENSMUSP00000109870,10090.ENSMUSP00000117963,10090.ENSMUSP00000128401,10090.ENSMUSP00000134163,10090.ENSMUSP00000134735…	Ctss,Lgmn,Tapbp,H2-K1,Tap2,H2-M3,H2-DMa,H2-Ab1,H2-Aa,Cd74,B2m,H2-DMb1,Rfx5,Tap1,H2-Q10,Psme1,Ctsl,H2-Eb1	1.23e-07	3.14e-06
KEGG	10090	Kid. Medulla	Upregulated	mmu04666	Fc gamma R-mediated phagocytosis	19	85	10090.ENSMUSP00000001780,10090.ENSMUSP00000003370,10090.ENSMUSP00000005889,10090.ENSMUSP00000015137,10090.ENSMUSP00000016094,10090.ENSMUSP00000025239,10090.ENSMUSP00000032561,10090.ENSMUSP00000033505,10090.ENSMUSP00000036270,10090.ENSMUSP00000036384,10090.ENSMUSP00000076933,10090.ENSMUSP00000079991,10090.ENSMUSP00000082822,10090.ENSMUSP00000090245,10090.ENSMUSP00000101315,10090.ENSMUSP00000113852…	Akt1,Hck,Vav1,Limk1,Ncf1,Bin1,Vasp,Was,Vav3,Rac2,Arpc5,Plcg2,Arpc1b,Marcks,Pik3cd,Syk,Inpp5d,Sphk1,Ptprc	1.44e-07	3.42e-06
KEGG	10090	Kid. Medulla	Upregulated	mmu04670	Leukocyte transendothelial migration	21	113	10090.ENSMUSP00000000299,10090.ENSMUSP00000005889,10090.ENSMUSP00000015484,10090.ENSMUSP00000016094,10090.ENSMUSP00000017604,10090.ENSMUSP00000021554,10090.ENSMUSP00000029574,10090.ENSMUSP00000032561,10090.ENSMUSP00000034187,10090.ENSMUSP00000036270,10090.ENSMUSP00000036384,10090.ENSMUSP00000068468,10090.ENSMUSP00000079991,10090.ENSMUSP00000083587,10090.ENSMUSP00000086204,10090.ENSMUSP00000094084…	Itgb2,Vav1,Cybb,Ncf1,Cyba,Actn1,Vcam1,Vasp,Mmp2,Vav3,Rac2,Itgam,Plcg2,Icam1,Mapk11,Ncf4,Itga4,Pik3cd,Itgal,Myl12a,Ncf2	4.84e-07	1.07e-05
KEGG	10090	Kid. Medulla	Upregulated	mmu04621	NOD-like receptor signaling pathway	28	193	10090.ENSMUSP00000015484,10090.ENSMUSP00000017604,10090.ENSMUSP00000019997,10090.ENSMUSP00000022830,10090.ENSMUSP00000023238,10090.ENSMUSP00000025867,10090.ENSMUSP00000027015,10090.ENSMUSP00000029812,10090.ENSMUSP00000033056,10090.ENSMUSP00000038150,10090.ENSMUSP00000055823,10090.ENSMUSP00000074471,10090.ENSMUSP00000079198,10090.ENSMUSP00000080209,10090.ENSMUSP00000082855,10090.ENSMUSP00000083385…	Cybb,Cyba,Tnfaip3,Ripk3,Gsdmd,Rela,Casp1,Nfkb1,Pycard,Itpr3,Pstpip1,Irak4,Oas1a,Oas2,Stat2,Rnasel,Mapk11,Gbp5,P2rx7,Trp53bp1,Ifi204,Traf2,Tmem173,Naip2,Panx1,Ripk1,Gbp2,Stat1	6.28e-07	1.3e-05
KEGG	10090	Kid. Medulla	Upregulated	mmu05132	Salmonella infection	29	212	10090.ENSMUSP00000001780,10090.ENSMUSP00000014922,10090.ENSMUSP00000018437,10090.ENSMUSP00000022830,10090.ENSMUSP00000023238,10090.ENSMUSP00000025867,10090.ENSMUSP00000026062,10090.ENSMUSP00000027015,10090.ENSMUSP00000029623,10090.ENSMUSP00000029812,10090.ENSMUSP00000033056,10090.ENSMUSP00000033093,10090.ENSMUSP00000035400,10090.ENSMUSP00000042698,10090.ENSMUSP00000055521,10090.ENSMUSP00000056669…	Akt1,Fhod1,Pfn1,Ripk3,Gsdmd,Rela,Casp7,Casp1,Tlr2,Nfkb1,Pycard,Bax,Nckap1l,Cyth4,Mlkl,Cd14,Pik3cg,Elmo1,Irak4,Arpc5,Arpc1b,Mapk11,Pik3cd,Traf2,Naip2,Myl12a,Ripk1,Tirap,Ptprc	1.17e-06	2.28e-05
KEGG	10090	Kid. Medulla	Upregulated	mmu05135	Yersinia infection	21	122	10090.ENSMUSP00000001780,10090.ENSMUSP00000005889,10090.ENSMUSP00000015137,10090.ENSMUSP00000023128,10090.ENSMUSP00000025867,10090.ENSMUSP00000027015,10090.ENSMUSP00000027291,10090.ENSMUSP00000029812,10090.ENSMUSP00000033056,10090.ENSMUSP00000033505,10090.ENSMUSP00000036270,10090.ENSMUSP00000036384,10090.ENSMUSP00000072334,10090.ENSMUSP00000074471,10090.ENSMUSP00000086204,10090.ENSMUSP00000087947…	Akt1,Vav1,Limk1,Itga5,Rela,Casp1,Zap70,Nfkb1,Pycard,Was,Vav3,Rac2,Elmo1,Irak4,Mapk11,Fyb,Wipf1,Itga4,Pik3cd,Traf2,Skap2	1.45e-06	2.67e-05
KEGG	10090	Kid. Medulla	Upregulated	mmu05322	Systemic lupus erythematosus	18	93	10090.ENSMUSP00000021554,10090.ENSMUSP00000024988,10090.ENSMUSP00000028233,10090.ENSMUSP00000031663,10090.ENSMUSP00000036747,10090.ENSMUSP00000037088,10090.ENSMUSP00000040246,10090.ENSMUSP00000041008,10090.ENSMUSP00000041855,10090.ENSMUSP00000046105,10090.ENSMUSP00000048836,10090.ENSMUSP00000063707,10090.ENSMUSP00000067541,10090.ENSMUSP00000069418,10090.ENSMUSP00000087047,10090.ENSMUSP00000109870…	Actn1,C3,Hc,C8b,C1qc,H2-DMa,C1qb,H2-Ab1,C8g,H2-Aa,C1qa,C1ra,C8a,C4b,Cd86,H2-DMb1,C1s1,H2-Eb1	1.89e-06	3.3e-05
KEGG	10090	Kid. Medulla	Upregulated	mmu05167	Kaposi sarcoma-associated herpesvirus infection	28	210	10090.ENSMUSP00000001780,10090.ENSMUSP00000003370,10090.ENSMUSP00000024988,10090.ENSMUSP00000025181,10090.ENSMUSP00000025867,10090.ENSMUSP00000029812,10090.ENSMUSP00000031670,10090.ENSMUSP00000033093,10090.ENSMUSP00000034056,10090.ENSMUSP00000035687,10090.ENSMUSP00000037180,10090.ENSMUSP00000038150,10090.ENSMUSP00000062864,10090.ENSMUSP00000079991,10090.ENSMUSP00000082855,10090.ENSMUSP00000083587…	Akt1,Hck,C3,H2-K1,Rela,Nfkb1,Gng11,Bax,Tlr3,H2-M3,Prex1,Itpr3,Pik3cg,Plcg2,Stat2,Icam1,Mapk11,Cd86,Pik3cd,Traf2,Syk,Ubc,Stat3,Cdk6,H2-Q10,Il6st,Stat1,Fgf2	2.78e-06	4.61e-05
KEGG	10090	Kid. Medulla	Upregulated	mmu04620	Toll-like receptor signaling pathway	17	97	10090.ENSMUSP00000001780,10090.ENSMUSP00000016168,10090.ENSMUSP00000025867,10090.ENSMUSP00000029623,10090.ENSMUSP00000029812,10090.ENSMUSP00000034056,10090.ENSMUSP00000056669,10090.ENSMUSP00000074471,10090.ENSMUSP00000084043,10090.ENSMUSP00000086204,10090.ENSMUSP00000087047,10090.ENSMUSP00000101315,10090.ENSMUSP00000107787,10090.ENSMUSP00000127021,10090.ENSMUSP00000129831,10090.ENSMUSP00000135435…	Akt1,Lbp,Rela,Tlr2,Nfkb1,Tlr3,Cd14,Irak4,Spp1,Mapk11,Cd86,Pik3cd,Tlr7,Irf5,Ripk1,Tirap,Stat1	1.15e-05	0.00018
KEGG	10090	Kid. Medulla	Upregulated	mmu04625	C-type lectin receptor signaling pathway	18	109	10090.ENSMUSP00000001780,10090.ENSMUSP00000025867,10090.ENSMUSP00000027015,10090.ENSMUSP00000029812,10090.ENSMUSP00000033056,10090.ENSMUSP00000038150,10090.ENSMUSP00000076130,10090.ENSMUSP00000078875,10090.ENSMUSP00000079991,10090.ENSMUSP00000082855,10090.ENSMUSP00000086204,10090.ENSMUSP00000092355,10090.ENSMUSP00000101315,10090.ENSMUSP00000101588,10090.ENSMUSP00000107512,10090.ENSMUSP00000110115…	Akt1,Rela,Casp1,Nfkb1,Pycard,Itpr3,Plk3,Fcer1g,Plcg2,Stat2,Mapk11,Relb,Pik3cd,Lsp1,Nfkb2,Cblb,Syk,Stat1	1.32e-05	0.0002
KEGG	10090	Kid. Medulla	Upregulated	mmu04064	NF-kappa B signaling pathway	17	99	10090.ENSMUSP00000016168,10090.ENSMUSP00000019997,10090.ENSMUSP00000025867,10090.ENSMUSP00000027291,10090.ENSMUSP00000029574,10090.ENSMUSP00000029812,10090.ENSMUSP00000033617,10090.ENSMUSP00000056669,10090.ENSMUSP00000074471,10090.ENSMUSP00000079991,10090.ENSMUSP00000083587,10090.ENSMUSP00000092355,10090.ENSMUSP00000107512,10090.ENSMUSP00000109872,10090.ENSMUSP00000113852,10090.ENSMUSP00000129831…	Lbp,Tnfaip3,Rela,Zap70,Vcam1,Nfkb1,Btk,Cd14,Irak4,Plcg2,Icam1,Relb,Nfkb2,Traf2,Syk,Ripk1,Tirap	1.46e-05	0.00021
KEGG	10090	Kid. Medulla	Upregulated	mmu04514	Cell adhesion molecules	22	157	10090.ENSMUSP00000000299,10090.ENSMUSP00000020939,10090.ENSMUSP00000025181,10090.ENSMUSP00000028794,10090.ENSMUSP00000029574,10090.ENSMUSP00000035687,10090.ENSMUSP00000037088,10090.ENSMUSP00000041008,10090.ENSMUSP00000046105,10090.ENSMUSP00000049534,10090.ENSMUSP00000068468,10090.ENSMUSP00000079613,10090.ENSMUSP00000083587,10090.ENSMUSP00000087047,10090.ENSMUSP00000099718,10090.ENSMUSP00000101913…	Itgb2,Nrcam,H2-K1,Siglec1,Vcam1,H2-M3,H2-DMa,H2-Ab1,H2-Aa,Spn,Itgam,Cdh3,Icam1,Cd86,Itga4,Itgal,Cadm3,H2-DMb1,Ncam1,H2-Q10,Ptprc,H2-Eb1	1.58e-05	0.00021
KEGG	10090	Kid. Medulla	Upregulated	mmu04933	AGE-RAGE signaling pathway in diabetic complications	17	99	10090.ENSMUSP00000001780,10090.ENSMUSP00000015484,10090.ENSMUSP00000025867,10090.ENSMUSP00000029574,10090.ENSMUSP00000029771,10090.ENSMUSP00000029812,10090.ENSMUSP00000033093,10090.ENSMUSP00000034187,10090.ENSMUSP00000039586,10090.ENSMUSP00000062333,10090.ENSMUSP00000066488,10090.ENSMUSP00000079991,10090.ENSMUSP00000083587,10090.ENSMUSP00000086204,10090.ENSMUSP00000101315,10090.ENSMUSP00000120152…	Akt1,Cybb,Rela,Vcam1,F3,Nfkb1,Bax,Mmp2,Serpine1,Tgfbr2,Agt,Plcg2,Icam1,Mapk11,Pik3cd,Stat3,Stat1	1.46e-05	0.00021
KEGG	10090	Kid. Medulla	Upregulated	mmu05203	Viral carcinogenesis	25	194	10090.ENSMUSP00000001565,10090.ENSMUSP00000008999,10090.ENSMUSP00000019109,10090.ENSMUSP00000020099,10090.ENSMUSP00000021554,10090.ENSMUSP00000024988,10090.ENSMUSP00000025181,10090.ENSMUSP00000025867,10090.ENSMUSP00000026416,10090.ENSMUSP00000029812,10090.ENSMUSP00000033093,10090.ENSMUSP00000035687,10090.ENSMUSP00000058521,10090.ENSMUSP00000066399,10090.ENSMUSP00000085226,10090.ENSMUSP00000095249…	Gtf2h4,Hdac5,Ywhah,Cdk1,Actn1,C3,H2-K1,Rela,Cdk2,Nfkb1,Bax,H2-M3,Atf2,Sp100,Hdac8,Hdac4,Rel,Pik3cd,Nfkb2,Traf2,Syk,Stat3,Cdk6,H2-Q10,Il6st	1.58e-05	0.00021
KEGG	10090	Kid. Medulla	Upregulated	mmu05134	Legionellosis	13	60	10090.ENSMUSP00000000299,10090.ENSMUSP00000020157,10090.ENSMUSP00000024988,10090.ENSMUSP00000025867,10090.ENSMUSP00000026062,10090.ENSMUSP00000027015,10090.ENSMUSP00000029623,10090.ENSMUSP00000029812,10090.ENSMUSP00000033056,10090.ENSMUSP00000056669,10090.ENSMUSP00000068468,10090.ENSMUSP00000107512,10090.ENSMUSP00000113890	Itgb2,Apaf1,C3,Rela,Casp7,Casp1,Tlr2,Nfkb1,Pycard,Cd14,Itgam,Nfkb2,Naip2	1.77e-05	0.00022
KEGG	10090	Kid. Medulla	Upregulated	mmu05170	Human immunodeficiency virus 1 infection	27	224	10090.ENSMUSP00000001780,10090.ENSMUSP00000015137,10090.ENSMUSP00000020099,10090.ENSMUSP00000025161,10090.ENSMUSP00000025181,10090.ENSMUSP00000025197,10090.ENSMUSP00000025867,10090.ENSMUSP00000029623,10090.ENSMUSP00000029812,10090.ENSMUSP00000031670,10090.ENSMUSP00000033093,10090.ENSMUSP00000035687,10090.ENSMUSP00000036384,10090.ENSMUSP00000038150,10090.ENSMUSP00000043996,10090.ENSMUSP00000059717…	Akt1,Limk1,Cdk1,Tapbp,H2-K1,Tap2,Rela,Tlr2,Nfkb1,Gng11,Bax,H2-M3,Rac2,Itpr3,Ap1g2,Samhd1,Irak4,Plcg2,Mapk11,B2m,Pik3cd,Apobec3,Traf2,Tmem173,Tap1,Ripk1,H2-Q10	2.16e-05	0.00026
KEGG	10090	Kid. Medulla	Upregulated	mmu04664	Fc epsilon RI signaling pathway	13	65	10090.ENSMUSP00000001780,10090.ENSMUSP00000005889,10090.ENSMUSP00000026795,10090.ENSMUSP00000033617,10090.ENSMUSP00000036270,10090.ENSMUSP00000036384,10090.ENSMUSP00000071130,10090.ENSMUSP00000078875,10090.ENSMUSP00000079991,10090.ENSMUSP00000086204,10090.ENSMUSP00000101315,10090.ENSMUSP00000113852,10090.ENSMUSP00000127941	Akt1,Vav1,Alox5,Btk,Vav3,Rac2,Alox5ap,Fcer1g,Plcg2,Mapk11,Pik3cd,Syk,Inpp5d	3.69e-05	0.00042
KEGG	10090	Kid. Medulla	Upregulated	mmu04062	Chemokine signaling pathway	23	183	10090.ENSMUSP00000001780,10090.ENSMUSP00000003370,10090.ENSMUSP00000005889,10090.ENSMUSP00000016094,10090.ENSMUSP00000025867,10090.ENSMUSP00000029812,10090.ENSMUSP00000031670,10090.ENSMUSP00000033505,10090.ENSMUSP00000036270,10090.ENSMUSP00000036384,10090.ENSMUSP00000037180,10090.ENSMUSP00000062864,10090.ENSMUSP00000072334,10090.ENSMUSP00000079991,10090.ENSMUSP00000082855,10090.ENSMUSP00000086114…	Akt1,Hck,Vav1,Ncf1,Rela,Nfkb1,Gng11,Was,Vav3,Rac2,Prex1,Pik3cg,Elmo1,Plcg2,Stat2,Grk2,Dock2,Pik3cd,Arrb2,Stat3,Ccr2,Adcy7,Stat1	4.82e-05	0.00053
KEGG	10090	Kid. Medulla	Upregulated	mmu04979	Cholesterol metabolism	11	48	10090.ENSMUSP00000000049,10090.ENSMUSP00000018311,10090.ENSMUSP00000030010,10090.ENSMUSP00000030280,10090.ENSMUSP00000034585,10090.ENSMUSP00000034588,10090.ENSMUSP00000036044,10090.ENSMUSP00000044004,10090.ENSMUSP00000104939,10090.ENSMUSP00000133302,10090.ENSMUSP00000140721	Apoh,Stard3,Abca1,Angptl3,Apoa4,Apoa1,Apob,Lrp1,Pltp,Apoe,Soat1	5e-05	0.00054
KEGG	10090	Kid. Medulla	Upregulated	mmu05206	MicroRNAs in cancer	21	159	10090.ENSMUSP00000004202,10090.ENSMUSP00000005218,10090.ENSMUSP00000008999,10090.ENSMUSP00000020991,10090.ENSMUSP00000022709,10090.ENSMUSP00000023128,10090.ENSMUSP00000024894,10090.ENSMUSP00000025522,10090.ENSMUSP00000028062,10090.ENSMUSP00000029812,10090.ENSMUSP00000030636,10090.ENSMUSP00000031565,10090.ENSMUSP00000044048,10090.ENSMUSP00000079991,10090.ENSMUSP00000090245,10090.ENSMUSP00000095249…	Dnmt1,Cd44,Hdac5,Dnmt3a,Spry2,Itga5,Cyp1b1,Pdgfrb,Vim,Nfkb1,Stmn1,Fscn1,Mcl1,Plcg2,Marcks,Hdac4,Pik3cd,Tpm1,Stat3,Cdk6,Zeb2	5.34e-05	0.00055
KEGG	10090	Kid. Medulla	Upregulated	mmu04810	Regulation of actin cytoskeleton	25	211	10090.ENSMUSP00000000299,10090.ENSMUSP00000005889,10090.ENSMUSP00000006101,10090.ENSMUSP00000006912,10090.ENSMUSP00000015137,10090.ENSMUSP00000018437,10090.ENSMUSP00000021554,10090.ENSMUSP00000023128,10090.ENSMUSP00000023589,10090.ENSMUSP00000025522,10090.ENSMUSP00000028681,10090.ENSMUSP00000033468,10090.ENSMUSP00000035400,10090.ENSMUSP00000036270,10090.ENSMUSP00000036384,10090.ENSMUSP00000068468…	Itgb2,Vav1,Itgae,Pip4k2a,Limk1,Pfn1,Actn1,Itga5,Kng1,Pdgfrb,F2,Arhgef6,Nckap1l,Vav3,Rac2,Itgam,Itgb5,Arpc5,Arpc1b,Kng2,Itga4,Pik3cd,Itgal,Myl12a,Fgf2	5.55e-05	0.00056
KEGG	10090	Kid. Medulla	Upregulated	mmu04668	TNF signaling pathway	17	112	10090.ENSMUSP00000001780,10090.ENSMUSP00000014743,10090.ENSMUSP00000019997,10090.ENSMUSP00000022830,10090.ENSMUSP00000025867,10090.ENSMUSP00000026062,10090.ENSMUSP00000029574,10090.ENSMUSP00000029812,10090.ENSMUSP00000055521,10090.ENSMUSP00000058521,10090.ENSMUSP00000083587,10090.ENSMUSP00000086204,10090.ENSMUSP00000087119,10090.ENSMUSP00000101315,10090.ENSMUSP00000104825,10090.ENSMUSP00000109872…	Akt1,Csf1,Tnfaip3,Ripk3,Rela,Casp7,Vcam1,Nfkb1,Mlkl,Atf2,Icam1,Mapk11,Mmp14,Pik3cd,Ifi47,Traf2,Ripk1	5.89e-05	0.00057
KEGG	10090	Kid. Medulla	Upregulated	mmu05162	Measles	19	140	10090.ENSMUSP00000001780,10090.ENSMUSP00000019997,10090.ENSMUSP00000020157,10090.ENSMUSP00000025867,10090.ENSMUSP00000026416,10090.ENSMUSP00000028259,10090.ENSMUSP00000029623,10090.ENSMUSP00000029812,10090.ENSMUSP00000033093,10090.ENSMUSP00000074471,10090.ENSMUSP00000079198,10090.ENSMUSP00000080209,10090.ENSMUSP00000082855,10090.ENSMUSP00000101315,10090.ENSMUSP00000107787,10090.ENSMUSP00000110115…	Akt1,Tnfaip3,Apaf1,Rela,Cdk2,Ifih1,Tlr2,Nfkb1,Bax,Irak4,Oas1a,Oas2,Stat2,Pik3cd,Tlr7,Cblb,Stat3,Cdk6,Stat1	8.63e-05	0.00082
KEGG	10090	Kid. Medulla	Upregulated	mmu05166	Human T-cell leukemia virus 1 infection	26	232	10090.ENSMUSP00000000299,10090.ENSMUSP00000001780,10090.ENSMUSP00000002445,10090.ENSMUSP00000025181,10090.ENSMUSP00000025867,10090.ENSMUSP00000026416,10090.ENSMUSP00000029812,10090.ENSMUSP00000033093,10090.ENSMUSP00000035687,10090.ENSMUSP00000037088,10090.ENSMUSP00000041008,10090.ENSMUSP00000046105,10090.ENSMUSP00000058521,10090.ENSMUSP00000062333,10090.ENSMUSP00000075916,10090.ENSMUSP00000081573…	Itgb2,Akt1,Ranbp3,H2-K1,Rela,Cdk2,Nfkb1,Bax,H2-M3,H2-DMa,H2-Ab1,H2-Aa,Atf2,Tgfbr2,Crtc1,Cdc26,Icam1,Relb,B2m,Pik3cd,Itgal,Nfkb2,H2-DMb1,Adcy7,H2-Q10,H2-Eb1	9.17e-05	0.00085
KEGG	10090	Kid. Medulla	Upregulated	mmu04662	B cell receptor signaling pathway	13	74	10090.ENSMUSP00000001780,10090.ENSMUSP00000004377,10090.ENSMUSP00000005889,10090.ENSMUSP00000024742,10090.ENSMUSP00000025867,10090.ENSMUSP00000029812,10090.ENSMUSP00000033617,10090.ENSMUSP00000036270,10090.ENSMUSP00000036384,10090.ENSMUSP00000079991,10090.ENSMUSP00000101315,10090.ENSMUSP00000113852,10090.ENSMUSP00000127941	Akt1,Ptpn6,Vav1,Nfkbie,Rela,Nfkb1,Btk,Vav3,Rac2,Plcg2,Pik3cd,Syk,Inpp5d	0.00012	0.0011
KEGG	10090	Kid. Medulla	Upregulated	mmu05416	Viral myocarditis	13	74	10090.ENSMUSP00000000299,10090.ENSMUSP00000025181,10090.ENSMUSP00000035687,10090.ENSMUSP00000036384,10090.ENSMUSP00000037088,10090.ENSMUSP00000041008,10090.ENSMUSP00000046105,10090.ENSMUSP00000083587,10090.ENSMUSP00000087047,10090.ENSMUSP00000101913,10090.ENSMUSP00000109870,10090.ENSMUSP00000134163,10090.ENSMUSP00000158533	Itgb2,H2-K1,H2-M3,Rac2,H2-DMa,H2-Ab1,H2-Aa,Icam1,Cd86,Itgal,H2-DMb1,H2-Q10,H2-Eb1	0.00012	0.0011
KEGG	10090	Kid. Medulla	Upregulated	mmu04210	Apoptosis	18	135	10090.ENSMUSP00000001780,10090.ENSMUSP00000015667,10090.ENSMUSP00000016400,10090.ENSMUSP00000020157,10090.ENSMUSP00000025867,10090.ENSMUSP00000026062,10090.ENSMUSP00000029812,10090.ENSMUSP00000032779,10090.ENSMUSP00000033093,10090.ENSMUSP00000038150,10090.ENSMUSP00000044048,10090.ENSMUSP00000094083,10090.ENSMUSP00000101315,10090.ENSMUSP00000108098,10090.ENSMUSP00000109872,10090.ENSMUSP00000121203…	Akt1,Ctss,Ctsz,Apaf1,Rela,Casp7,Nfkb1,Ctsc,Bax,Itpr3,Mcl1,Csf2rb2,Pik3cd,Parp3,Traf2,Ctsd,Ripk1,Ctsl	0.00016	0.0014
KEGG	10090	Kid. Medulla	Upregulated	mmu05142	Chagas disease	15	100	10090.ENSMUSP00000001780,10090.ENSMUSP00000023589,10090.ENSMUSP00000024988,10090.ENSMUSP00000025867,10090.ENSMUSP00000029623,10090.ENSMUSP00000029812,10090.ENSMUSP00000036747,10090.ENSMUSP00000039586,10090.ENSMUSP00000040246,10090.ENSMUSP00000048836,10090.ENSMUSP00000062333,10090.ENSMUSP00000074471,10090.ENSMUSP00000086204,10090.ENSMUSP00000097623,10090.ENSMUSP00000101315	Akt1,Kng1,C3,Rela,Tlr2,Nfkb1,C1qc,Serpine1,C1qb,C1qa,Tgfbr2,Irak4,Mapk11,Kng2,Pik3cd	0.00018	0.0015
KEGG	10090	Kid. Medulla	Upregulated	mmu04659	Th17 cell differentiation	15	101	10090.ENSMUSP00000024742,10090.ENSMUSP00000025867,10090.ENSMUSP00000027291,10090.ENSMUSP00000029812,10090.ENSMUSP00000037088,10090.ENSMUSP00000041008,10090.ENSMUSP00000046105,10090.ENSMUSP00000062333,10090.ENSMUSP00000069744,10090.ENSMUSP00000086204,10090.ENSMUSP00000109870,10090.ENSMUSP00000120152,10090.ENSMUSP00000138836,10090.ENSMUSP00000141132,10090.ENSMUSP00000158533	Nfkbie,Rela,Zap70,Nfkb1,H2-DMa,H2-Ab1,H2-Aa,Tgfbr2,Rara,Mapk11,H2-DMb1,Stat3,Il6st,Stat1,H2-Eb1	0.00019	0.0016
KEGG	10090	Kid. Medulla	Upregulated	mmu05163	Human cytomegalovirus infection	25	237	10090.ENSMUSP00000001326,10090.ENSMUSP00000001780,10090.ENSMUSP00000025161,10090.ENSMUSP00000025181,10090.ENSMUSP00000025197,10090.ENSMUSP00000025867,10090.ENSMUSP00000029812,10090.ENSMUSP00000031670,10090.ENSMUSP00000033093,10090.ENSMUSP00000035687,10090.ENSMUSP00000036384,10090.ENSMUSP00000038150,10090.ENSMUSP00000058521,10090.ENSMUSP00000086204,10090.ENSMUSP00000099534,10090.ENSMUSP00000101315…	Sp1,Akt1,Tapbp,H2-K1,Tap2,Rela,Nfkb1,Gng11,Bax,H2-M3,Rac2,Itpr3,Atf2,Mapk11,B2m,Pik3cd,Traf2,Tmem173,Stat3,Cdk6,Tap1,Akap13,Ripk1,Adcy7,H2-Q10	0.00029	0.0023
KEGG	10090	Kid. Medulla	Upregulated	mmu05145	Toxoplasmosis	15	106	10090.ENSMUSP00000001780,10090.ENSMUSP00000025867,10090.ENSMUSP00000026795,10090.ENSMUSP00000029623,10090.ENSMUSP00000029812,10090.ENSMUSP00000037088,10090.ENSMUSP00000041008,10090.ENSMUSP00000046105,10090.ENSMUSP00000062864,10090.ENSMUSP00000074471,10090.ENSMUSP00000086204,10090.ENSMUSP00000109870,10090.ENSMUSP00000120152,10090.ENSMUSP00000141132,10090.ENSMUSP00000158533	Akt1,Rela,Alox5,Tlr2,Nfkb1,H2-DMa,H2-Ab1,H2-Aa,Pik3cg,Irak4,Mapk11,H2-DMb1,Stat3,Stat1,H2-Eb1	0.00031	0.0024
KEGG	10090	Kid. Medulla	Upregulated	mmu05168	Herpes simplex virus 1 infection	37	419	10090.ENSMUSP00000001780,10090.ENSMUSP00000020157,10090.ENSMUSP00000023128,10090.ENSMUSP00000024988,10090.ENSMUSP00000025161,10090.ENSMUSP00000025181,10090.ENSMUSP00000025197,10090.ENSMUSP00000025867,10090.ENSMUSP00000028233,10090.ENSMUSP00000028259,10090.ENSMUSP00000029623,10090.ENSMUSP00000029812,10090.ENSMUSP00000033093,10090.ENSMUSP00000034056,10090.ENSMUSP00000035687,10090.ENSMUSP00000037088…	Akt1,Apaf1,Itga5,C3,Tapbp,H2-K1,Tap2,Rela,Hc,Ifih1,Tlr2,Nfkb1,Bax,Tlr3,H2-M3,H2-DMa,H2-Ab1,H2-Aa,Sp100,Irak4,Oas1a,Oas2,Pml,Stat2,Rnasel,Cd74,B2m,Pik3cd,Zfp688,H2-DMb1,Traf2,Tmem173,Syk,Tap1,H2-Q10,Stat1,H2-Eb1	0.00034	0.0025
KEGG	10090	Kid. Medulla	Upregulated	mmu04071	Sphingolipid signaling pathway	16	120	10090.ENSMUSP00000001780,10090.ENSMUSP00000023589,10090.ENSMUSP00000025867,10090.ENSMUSP00000029812,10090.ENSMUSP00000033093,10090.ENSMUSP00000034000,10090.ENSMUSP00000036384,10090.ENSMUSP00000042187,10090.ENSMUSP00000078875,10090.ENSMUSP00000082053,10090.ENSMUSP00000086204,10090.ENSMUSP00000097623,10090.ENSMUSP00000101315,10090.ENSMUSP00000109872,10090.ENSMUSP00000121203,10090.ENSMUSP00000131010	Akt1,Kng1,Rela,Nfkb1,Bax,Asah1,Rac2,Smpd1,Fcer1g,Ppp2r5c,Mapk11,Kng2,Pik3cd,Traf2,Ctsd,Sphk1	0.00036	0.0026
KEGG	10090	Kid. Medulla	Upregulated	mmu05160	Hepatitis C	19	158	10090.ENSMUSP00000001780,10090.ENSMUSP00000019109,10090.ENSMUSP00000020157,10090.ENSMUSP00000025867,10090.ENSMUSP00000026416,10090.ENSMUSP00000029812,10090.ENSMUSP00000033093,10090.ENSMUSP00000034056,10090.ENSMUSP00000079198,10090.ENSMUSP00000080209,10090.ENSMUSP00000082855,10090.ENSMUSP00000083385,10090.ENSMUSP00000099888,10090.ENSMUSP00000101315,10090.ENSMUSP00000109872,10090.ENSMUSP00000120152…	Akt1,Ywhah,Apaf1,Rela,Cdk2,Nfkb1,Bax,Tlr3,Oas1a,Oas2,Stat2,Rnasel,Ifit1,Pik3cd,Traf2,Stat3,Cdk6,Ripk1,Stat1	0.00035	0.0026
KEGG	10090	Kid. Medulla	Upregulated	mmu04110	Cell cycle	16	121	10090.ENSMUSP00000000505,10090.ENSMUSP00000019109,10090.ENSMUSP00000020099,10090.ENSMUSP00000023353,10090.ENSMUSP00000026416,10090.ENSMUSP00000027601,10090.ENSMUSP00000028817,10090.ENSMUSP00000050374,10090.ENSMUSP00000059192,10090.ENSMUSP00000061923,10090.ENSMUSP00000081573,10090.ENSMUSP00000088845,10090.ENSMUSP00000126024,10090.ENSMUSP00000126135,10090.ENSMUSP00000128828,10090.ENSMUSP00000147881	Mcm7,Ywhah,Cdk1,Mcm4,Cdk2,Mcm6,Pcna,Sfn,Mcm3,Mcm2,Cdc26,Cdk7,Cdk6,Mcm5,Cdkn1c,Tfdp1	0.00039	0.0028
KEGG	10090	Kid. Medulla	Upregulated	mmu05161	Hepatitis B	19	160	10090.ENSMUSP00000001780,10090.ENSMUSP00000020157,10090.ENSMUSP00000025867,10090.ENSMUSP00000026416,10090.ENSMUSP00000028259,10090.ENSMUSP00000028817,10090.ENSMUSP00000029623,10090.ENSMUSP00000029812,10090.ENSMUSP00000033093,10090.ENSMUSP00000034056,10090.ENSMUSP00000058521,10090.ENSMUSP00000062333,10090.ENSMUSP00000074471,10090.ENSMUSP00000082855,10090.ENSMUSP00000086204,10090.ENSMUSP00000101315…	Akt1,Apaf1,Rela,Cdk2,Ifih1,Pcna,Tlr2,Nfkb1,Bax,Tlr3,Atf2,Tgfbr2,Irak4,Stat2,Mapk11,Pik3cd,Stat3,Tirap,Stat1	0.00041	0.0028
KEGG	10090	Kid. Medulla	Upregulated	mmu05146	Amoebiasis	14	102	10090.ENSMUSP00000000299,10090.ENSMUSP00000017188,10090.ENSMUSP00000021554,10090.ENSMUSP00000025867,10090.ENSMUSP00000029623,10090.ENSMUSP00000029812,10090.ENSMUSP00000031663,10090.ENSMUSP00000041855,10090.ENSMUSP00000056669,10090.ENSMUSP00000067541,10090.ENSMUSP00000068468,10090.ENSMUSP00000099002,10090.ENSMUSP00000101315,10090.ENSMUSP00000105922	Itgb2,Serpinb6a,Actn1,Rela,Tlr2,Nfkb1,C8b,C8g,Cd14,C8a,Itgam,Serpinb9,Pik3cd,Serpinb6b	0.00064	0.0043
KEGG	10090	Kid. Medulla	Upregulated	mmu05321	Inflammatory bowel disease	10	60	10090.ENSMUSP00000025867,10090.ENSMUSP00000029623,10090.ENSMUSP00000029812,10090.ENSMUSP00000037088,10090.ENSMUSP00000041008,10090.ENSMUSP00000046105,10090.ENSMUSP00000109870,10090.ENSMUSP00000120152,10090.ENSMUSP00000141132,10090.ENSMUSP00000158533	Rela,Tlr2,Nfkb1,H2-DMa,H2-Ab1,H2-Aa,H2-DMb1,Stat3,Stat1,H2-Eb1	0.001	0.0067
KEGG	10090	Kid. Medulla	Upregulated	mmu04540	Gap junction	12	84	10090.ENSMUSP00000001513,10090.ENSMUSP00000020099,10090.ENSMUSP00000025522,10090.ENSMUSP00000029635,10090.ENSMUSP00000038150,10090.ENSMUSP00000071134,10090.ENSMUSP00000073268,10090.ENSMUSP00000075178,10090.ENSMUSP00000094326,10090.ENSMUSP00000111398,10090.ENSMUSP00000132528,10090.ENSMUSP00000142138	Tubb6,Cdk1,Pdgfrb,Gucy1b1,Itpr3,Tubb3,Prkg1,Tubb2b,Map3k2,Gucy1a2,Adcy7,Gucy1a1	0.0011	0.0071
KEGG	10090	Kid. Medulla	Upregulated	mmu05212	Pancreatic cancer	11	72	10090.ENSMUSP00000001780,10090.ENSMUSP00000025867,10090.ENSMUSP00000029812,10090.ENSMUSP00000033093,10090.ENSMUSP00000033468,10090.ENSMUSP00000036384,10090.ENSMUSP00000062333,10090.ENSMUSP00000101315,10090.ENSMUSP00000120152,10090.ENSMUSP00000126024,10090.ENSMUSP00000141132	Akt1,Rela,Nfkb1,Bax,Arhgef6,Rac2,Tgfbr2,Pik3cd,Stat3,Cdk6,Stat1	0.0011	0.0071
KEGG	10090	Kid. Medulla	Upregulated	mmu05323	Rheumatoid arthritis	12	84	10090.ENSMUSP00000000299,10090.ENSMUSP00000014743,10090.ENSMUSP00000029623,10090.ENSMUSP00000037088,10090.ENSMUSP00000041008,10090.ENSMUSP00000046105,10090.ENSMUSP00000083587,10090.ENSMUSP00000087047,10090.ENSMUSP00000101913,10090.ENSMUSP00000109870,10090.ENSMUSP00000152169,10090.ENSMUSP00000158533	Itgb2,Csf1,Tlr2,H2-DMa,H2-Ab1,H2-Aa,Icam1,Cd86,Itgal,H2-DMb1,Ctsl,H2-Eb1	0.0011	0.0071
KEGG	10090	Kid. Medulla	Upregulated	mmu05332	Graft-versus-host disease	9	50	10090.ENSMUSP00000025181,10090.ENSMUSP00000035687,10090.ENSMUSP00000037088,10090.ENSMUSP00000041008,10090.ENSMUSP00000046105,10090.ENSMUSP00000087047,10090.ENSMUSP00000109870,10090.ENSMUSP00000134163,10090.ENSMUSP00000158533	H2-K1,H2-M3,H2-DMa,H2-Ab1,H2-Aa,Cd86,H2-DMb1,H2-Q10,H2-Eb1	0.0011	0.0071
KEGG	10090	Kid. Medulla	Upregulated	mmu05330	Allograft rejection	9	51	10090.ENSMUSP00000025181,10090.ENSMUSP00000035687,10090.ENSMUSP00000037088,10090.ENSMUSP00000041008,10090.ENSMUSP00000046105,10090.ENSMUSP00000087047,10090.ENSMUSP00000109870,10090.ENSMUSP00000134163,10090.ENSMUSP00000158533	H2-K1,H2-M3,H2-DMa,H2-Ab1,H2-Aa,Cd86,H2-DMb1,H2-Q10,H2-Eb1	0.0013	0.0076
KEGG	10090	Kid. Medulla	Upregulated	mmu04672	Intestinal immune network for IgA production	8	41	10090.ENSMUSP00000027675,10090.ENSMUSP00000037088,10090.ENSMUSP00000041008,10090.ENSMUSP00000046105,10090.ENSMUSP00000087047,10090.ENSMUSP00000099718,10090.ENSMUSP00000109870,10090.ENSMUSP00000158533	Pigr,H2-DMa,H2-Ab1,H2-Aa,Cd86,Itga4,H2-DMb1,H2-Eb1	0.0013	0.0078
KEGG	10090	Kid. Medulla	Upregulated	mmu05235	PD-L1 expression and PD-1 checkpoint pathway in cancer	12	86	10090.ENSMUSP00000001780,10090.ENSMUSP00000004377,10090.ENSMUSP00000024742,10090.ENSMUSP00000025867,10090.ENSMUSP00000027291,10090.ENSMUSP00000029623,10090.ENSMUSP00000029812,10090.ENSMUSP00000086204,10090.ENSMUSP00000101315,10090.ENSMUSP00000120152,10090.ENSMUSP00000135435,10090.ENSMUSP00000141132	Akt1,Ptpn6,Nfkbie,Rela,Zap70,Tlr2,Nfkb1,Mapk11,Pik3cd,Stat3,Tirap,Stat1	0.0013	0.0078
KEGG	10090	Kid. Medulla	Upregulated	mmu04217	Necroptosis	17	153	10090.ENSMUSP00000015484,10090.ENSMUSP00000019997,10090.ENSMUSP00000022830,10090.ENSMUSP00000027015,10090.ENSMUSP00000029018,10090.ENSMUSP00000033056,10090.ENSMUSP00000033093,10090.ENSMUSP00000034056,10090.ENSMUSP00000042187,10090.ENSMUSP00000055521,10090.ENSMUSP00000082855,10090.ENSMUSP00000092002,10090.ENSMUSP00000109872,10090.ENSMUSP00000120152,10090.ENSMUSP00000129831,10090.ENSMUSP00000141132…	Cybb,Tnfaip3,Ripk3,Casp1,Zbp1,Pycard,Bax,Tlr3,Smpd1,Mlkl,Stat2,Ftl1,Traf2,Stat3,Ripk1,Stat1,Fth1	0.0015	0.0089
KEGG	10090	Kid. Medulla	Upregulated	mmu05205	Proteoglycans in cancer	20	196	10090.ENSMUSP00000001780,10090.ENSMUSP00000004377,10090.ENSMUSP00000005218,10090.ENSMUSP00000005889,10090.ENSMUSP00000017488,10090.ENSMUSP00000023128,10090.ENSMUSP00000023531,10090.ENSMUSP00000029623,10090.ENSMUSP00000034187,10090.ENSMUSP00000036270,10090.ENSMUSP00000038150,10090.ENSMUSP00000058629,10090.ENSMUSP00000069416,10090.ENSMUSP00000079991,10090.ENSMUSP00000086204,10090.ENSMUSP00000101315…	Akt1,Ptpn6,Cd44,Vav1,Vtn,Itga5,Hcls1,Tlr2,Mmp2,Vav3,Itpr3,Fzd1,Itgb5,Plcg2,Mapk11,Pik3cd,Stat3,Fgf2,Cbl,Ctsl	0.0016	0.0091
KEGG	10090	Kid. Medulla	Upregulated	mmu04650	Natural killer cell mediated cytotoxicity	14	114	10090.ENSMUSP00000000299,10090.ENSMUSP00000004377,10090.ENSMUSP00000005889,10090.ENSMUSP00000025181,10090.ENSMUSP00000027291,10090.ENSMUSP00000036270,10090.ENSMUSP00000036384,10090.ENSMUSP00000064241,10090.ENSMUSP00000078875,10090.ENSMUSP00000079991,10090.ENSMUSP00000083587,10090.ENSMUSP00000101315,10090.ENSMUSP00000101913,10090.ENSMUSP00000113852	Itgb2,Ptpn6,Vav1,H2-K1,Zap70,Vav3,Rac2,Cd48,Fcer1g,Plcg2,Icam1,Pik3cd,Itgal,Syk	0.0017	0.0093
KEGG	10090	Kid. Medulla	Upregulated	mmu05310	Asthma	6	24	10090.ENSMUSP00000037088,10090.ENSMUSP00000041008,10090.ENSMUSP00000046105,10090.ENSMUSP00000078875,10090.ENSMUSP00000109870,10090.ENSMUSP00000158533	H2-DMa,H2-Ab1,H2-Aa,Fcer1g,H2-DMb1,H2-Eb1	0.0018	0.0098
KEGG	10090	Kid. Medulla	Upregulated	mmu04640	Hematopoietic cell lineage	12	90	10090.ENSMUSP00000005218,10090.ENSMUSP00000014743,10090.ENSMUSP00000023128,10090.ENSMUSP00000037088,10090.ENSMUSP00000041008,10090.ENSMUSP00000046105,10090.ENSMUSP00000056669,10090.ENSMUSP00000068468,10090.ENSMUSP00000099718,10090.ENSMUSP00000109870,10090.ENSMUSP00000110923,10090.ENSMUSP00000158533	Cd44,Csf1,Itga5,H2-DMa,H2-Ab1,H2-Aa,Cd14,Itgam,Itga4,H2-DMb1,Csf1r,H2-Eb1	0.0019	0.0102
KEGG	10090	Kid. Medulla	Upregulated	mmu04660	T cell receptor signaling pathway	13	103	10090.ENSMUSP00000001780,10090.ENSMUSP00000004377,10090.ENSMUSP00000005889,10090.ENSMUSP00000024742,10090.ENSMUSP00000025867,10090.ENSMUSP00000027291,10090.ENSMUSP00000029812,10090.ENSMUSP00000036270,10090.ENSMUSP00000046532,10090.ENSMUSP00000086204,10090.ENSMUSP00000101315,10090.ENSMUSP00000110115,10090.ENSMUSP00000138350	Akt1,Ptpn6,Vav1,Nfkbie,Rela,Zap70,Nfkb1,Vav3,Grap2,Mapk11,Pik3cd,Cblb,Ptprc	0.002	0.0103
KEGG	10090	Kid. Medulla	Upregulated	mmu04940	Type I diabetes mellitus	9	58	10090.ENSMUSP00000025181,10090.ENSMUSP00000035687,10090.ENSMUSP00000037088,10090.ENSMUSP00000041008,10090.ENSMUSP00000046105,10090.ENSMUSP00000087047,10090.ENSMUSP00000109870,10090.ENSMUSP00000134163,10090.ENSMUSP00000158533	H2-K1,H2-M3,H2-DMa,H2-Ab1,H2-Aa,Cd86,H2-DMb1,H2-Q10,H2-Eb1	0.0028	0.0143
KEGG	10090	Kid. Medulla	Upregulated	mmu05221	Acute myeloid leukemia	10	70	10090.ENSMUSP00000001780,10090.ENSMUSP00000025867,10090.ENSMUSP00000029812,10090.ENSMUSP00000056669,10090.ENSMUSP00000068468,10090.ENSMUSP00000069744,10090.ENSMUSP00000082816,10090.ENSMUSP00000101315,10090.ENSMUSP00000110923,10090.ENSMUSP00000120152	Akt1,Rela,Nfkb1,Cd14,Itgam,Rara,Pml,Pik3cd,Csf1r,Stat3	0.0028	0.0144
KEGG	10090	Kid. Medulla	Upregulated	mmu04015	Rap1 signaling pathway	20	208	10090.ENSMUSP00000000299,10090.ENSMUSP00000001780,10090.ENSMUSP00000005889,10090.ENSMUSP00000014290,10090.ENSMUSP00000014743,10090.ENSMUSP00000018437,10090.ENSMUSP00000021689,10090.ENSMUSP00000025522,10090.ENSMUSP00000032561,10090.ENSMUSP00000036270,10090.ENSMUSP00000036384,10090.ENSMUSP00000068468,10090.ENSMUSP00000086204,10090.ENSMUSP00000087947,10090.ENSMUSP00000101315,10090.ENSMUSP00000101913…	Itgb2,Akt1,Vav1,Apbb1ip,Csf1,Pfn1,Evl,Pdgfrb,Vasp,Vav3,Rac2,Itgam,Mapk11,Fyb,Pik3cd,Itgal,Csf1r,Adcy7,Fgf2,Rapgef6	0.003	0.0153
KEGG	10090	Kid. Medulla	Upregulated	mmu04658	Th1 and Th2 cell differentiation	11	86	10090.ENSMUSP00000024742,10090.ENSMUSP00000025867,10090.ENSMUSP00000027291,10090.ENSMUSP00000029812,10090.ENSMUSP00000037088,10090.ENSMUSP00000041008,10090.ENSMUSP00000046105,10090.ENSMUSP00000086204,10090.ENSMUSP00000109870,10090.ENSMUSP00000141132,10090.ENSMUSP00000158533	Nfkbie,Rela,Zap70,Nfkb1,H2-DMa,H2-Ab1,H2-Aa,Mapk11,H2-DMb1,Stat1,H2-Eb1	0.0038	0.0191
KEGG	10090	Kid. Medulla	Upregulated	mmu05418	Fluid shear stress and atherosclerosis	15	142	10090.ENSMUSP00000001780,10090.ENSMUSP00000016094,10090.ENSMUSP00000017604,10090.ENSMUSP00000025867,10090.ENSMUSP00000029574,10090.ENSMUSP00000029812,10090.ENSMUSP00000034187,10090.ENSMUSP00000036384,10090.ENSMUSP00000083587,10090.ENSMUSP00000086204,10090.ENSMUSP00000088935,10090.ENSMUSP00000101315,10090.ENSMUSP00000102296,10090.ENSMUSP00000140404,10090.ENSMUSP00000152169	Akt1,Ncf1,Cyba,Rela,Vcam1,Nfkb1,Mmp2,Rac2,Icam1,Mapk11,Sumo1,Pik3cd,Gstm6,Ncf2,Ctsl	0.0044	0.0214
KEGG	10090	Kid. Medulla	Upregulated	mmu04623	Cytosolic DNA-sensing pathway	9	63	10090.ENSMUSP00000022830,10090.ENSMUSP00000025867,10090.ENSMUSP00000027015,10090.ENSMUSP00000029018,10090.ENSMUSP00000029812,10090.ENSMUSP00000033056,10090.ENSMUSP00000050971,10090.ENSMUSP00000111393,10090.ENSMUSP00000129831	Ripk3,Rela,Casp1,Zbp1,Nfkb1,Pycard,Trex1,Tmem173,Ripk1	0.0045	0.0217
KEGG	10090	Kid. Medulla	Upregulated	mmu05020	Prion disease	23	263	10090.ENSMUSP00000001513,10090.ENSMUSP00000015484,10090.ENSMUSP00000016094,10090.ENSMUSP00000017604,10090.ENSMUSP00000020157,10090.ENSMUSP00000028233,10090.ENSMUSP00000031663,10090.ENSMUSP00000033093,10090.ENSMUSP00000036384,10090.ENSMUSP00000036747,10090.ENSMUSP00000038150,10090.ENSMUSP00000040246,10090.ENSMUSP00000041855,10090.ENSMUSP00000048836,10090.ENSMUSP00000058521,10090.ENSMUSP00000067541…	Tubb6,Cybb,Ncf1,Cyba,Apaf1,Hc,C8b,Bax,Rac2,C1qc,Itpr3,C1qb,C8g,C1qa,Atf2,C8a,Tubb3,Tubb2b,Mapk11,Ncf4,Pik3cd,Ncam1,Ncf2	0.0046	0.022
KEGG	10090	Kid. Medulla	Upregulated	mmu01521	EGFR tyrosine kinase inhibitor resistance	10	78	10090.ENSMUSP00000001780,10090.ENSMUSP00000002677,10090.ENSMUSP00000025522,10090.ENSMUSP00000033093,10090.ENSMUSP00000033828,10090.ENSMUSP00000071289,10090.ENSMUSP00000079991,10090.ENSMUSP00000101315,10090.ENSMUSP00000120152,10090.ENSMUSP00000143094	Akt1,Axl,Pdgfrb,Bax,Gas6,Nf1,Plcg2,Pik3cd,Stat3,Fgf2	0.0056	0.0264
KEGG	10090	Kid. Medulla	Upregulated	mmu05202	Transcriptional misregulation in cancer	18	191	10090.ENSMUSP00000000395,10090.ENSMUSP00000001326,10090.ENSMUSP00000018645,10090.ENSMUSP00000025867,10090.ENSMUSP00000027587,10090.ENSMUSP00000029812,10090.ENSMUSP00000030763,10090.ENSMUSP00000033093,10090.ENSMUSP00000056669,10090.ENSMUSP00000062333,10090.ENSMUSP00000068468,10090.ENSMUSP00000069744,10090.ENSMUSP00000076864,10090.ENSMUSP00000079818,10090.ENSMUSP00000082816,10090.ENSMUSP00000087047…	Tmprss2,Sp1,Ncor1,Rela,Ccnt2,Nfkb1,Cdk14,Bax,Cd14,Tgfbr2,Itgam,Rara,Tfe3,Etv6,Pml,Cd86,Rel,Csf1r	0.0058	0.0266
KEGG	10090	Kid. Medulla	Upregulated	mmu03430	Mismatch repair	5	22	10090.ENSMUSP00000023867,10090.ENSMUSP00000028817,10090.ENSMUSP00000099621,10090.ENSMUSP00000099986,10090.ENSMUSP00000136972	Rfc2,Pcna,Rpa2,Pold2,Lig1	0.0061	0.0279
KEGG	10090	Kid. Medulla	Upregulated	mmu03420	Nucleotide excision repair	7	43	10090.ENSMUSP00000001565,10090.ENSMUSP00000023867,10090.ENSMUSP00000028817,10090.ENSMUSP00000088845,10090.ENSMUSP00000099621,10090.ENSMUSP00000099986,10090.ENSMUSP00000136972	Gtf2h4,Rfc2,Pcna,Cdk7,Rpa2,Pold2,Lig1	0.0063	0.0284
KEGG	10090	Kid. Medulla	Upregulated	mmu05320	Autoimmune thyroid disease	9	67	10090.ENSMUSP00000025181,10090.ENSMUSP00000035687,10090.ENSMUSP00000037088,10090.ENSMUSP00000041008,10090.ENSMUSP00000046105,10090.ENSMUSP00000087047,10090.ENSMUSP00000109870,10090.ENSMUSP00000134163,10090.ENSMUSP00000158533	H2-K1,H2-M3,H2-DMa,H2-Ab1,H2-Aa,Cd86,H2-DMb1,H2-Q10,H2-Eb1	0.0065	0.0286
KEGG	10090	Kid. Medulla	Upregulated	mmu03410	Base excision repair	6	33	10090.ENSMUSP00000028817,10090.ENSMUSP00000099986,10090.ENSMUSP00000108098,10090.ENSMUSP00000117246,10090.ENSMUSP00000136972,10090.ENSMUSP00000146105	Pcna,Pold2,Parp3,Fen1,Lig1,Xrcc1	0.0071	0.0308
KEGG	10090	Kid. Medulla	Upregulated	mmu04218	Cellular senescence	16	168	10090.ENSMUSP00000001780,10090.ENSMUSP00000019987,10090.ENSMUSP00000020099,10090.ENSMUSP00000025181,10090.ENSMUSP00000025867,10090.ENSMUSP00000026416,10090.ENSMUSP00000029812,10090.ENSMUSP00000035687,10090.ENSMUSP00000038150,10090.ENSMUSP00000039586,10090.ENSMUSP00000062333,10090.ENSMUSP00000086204,10090.ENSMUSP00000101315,10090.ENSMUSP00000126024,10090.ENSMUSP00000134163,10090.ENSMUSP00000141331	Akt1,Traf3ip2,Cdk1,H2-K1,Rela,Cdk2,Nfkb1,H2-M3,Itpr3,Serpine1,Tgfbr2,Mapk11,Pik3cd,Cdk6,H2-Q10,Lin9	0.0082	0.0352
KEGG	10090	Kid. Medulla	Upregulated	mmu04144	Endocytosis	21	250	10090.ENSMUSP00000003268,10090.ENSMUSP00000025181,10090.ENSMUSP00000025239,10090.ENSMUSP00000035687,10090.ENSMUSP00000042698,10090.ENSMUSP00000062333,10090.ENSMUSP00000064893,10090.ENSMUSP00000068195,10090.ENSMUSP00000076933,10090.ENSMUSP00000082816,10090.ENSMUSP00000082822,10090.ENSMUSP00000086114,10090.ENSMUSP00000092268,10090.ENSMUSP00000096293,10090.ENSMUSP00000102624,10090.ENSMUSP00000104208…	Sh3gl1,H2-K1,Bin1,H2-M3,Cyth4,Tgfbr2,Arfgap3,Rab31,Arpc5,Pml,Arpc1b,Grk2,Wipf1,Psd3,Arap1,Arrb2,Sh3kbp1,Cblb,H2-Q10,Rab11fip5,Cbl	0.0099	0.0422
KEGG	10090	Kid. Medulla	Upregulated	mmu05340	Primary immunodeficiency	6	36	10090.ENSMUSP00000025197,10090.ENSMUSP00000027291,10090.ENSMUSP00000033617,10090.ENSMUSP00000117963,10090.ENSMUSP00000128401,10090.ENSMUSP00000138350	Tap2,Zap70,Btk,Rfx5,Tap1,Ptprc	0.0101	0.0426
KEGG	10090	Kid. Medulla	Upregulated	mmu04010	MAPK signaling pathway	23	287	10090.ENSMUSP00000001780,10090.ENSMUSP00000014743,10090.ENSMUSP00000018353,10090.ENSMUSP00000025522,10090.ENSMUSP00000025867,10090.ENSMUSP00000029812,10090.ENSMUSP00000030636,10090.ENSMUSP00000036384,10090.ENSMUSP00000056669,10090.ENSMUSP00000058521,10090.ENSMUSP00000062333,10090.ENSMUSP00000071289,10090.ENSMUSP00000074471,10090.ENSMUSP00000082995,10090.ENSMUSP00000086204,10090.ENSMUSP00000092355…	Akt1,Csf1,Stk4,Pdgfrb,Rela,Nfkb1,Stmn1,Rac2,Cd14,Atf2,Tgfbr2,Nf1,Irak4,Map4k1,Mapk11,Relb,Jund,Map3k2,Arrb2,Nfkb2,Traf2,Csf1r,Fgf2	0.0118	0.0488
KEGG	10090	Kid. Medulla	Downregulated	mmu01100	Metabolic pathways	129	1534	10090.ENSMUSP00000000175,10090.ENSMUSP00000003620,10090.ENSMUSP00000005647,10090.ENSMUSP00000005826,10090.ENSMUSP00000006508,10090.ENSMUSP00000006544,10090.ENSMUSP00000007340,10090.ENSMUSP00000011058,10090.ENSMUSP00000011526,10090.ENSMUSP00000013737,10090.ENSMUSP00000014698,10090.ENSMUSP00000016034,10090.ENSMUSP00000016571,10090.ENSMUSP00000020034,10090.ENSMUSP00000020277,10090.ENSMUSP00000020768…	Sdhd,Prodh,Ndufs3,Cs,Ggt1,Gcat,Atp12a,Pdhx,Dhdh,Ndufs2,Dguok,Amdhd1,Ndufa1,Echdc1,Hkdc1,Pgam2,L2hgdh,Acot4,Adssl1,Auh,Uqcrb,Mccc2,Hmgcr,Pdhb,Oxsm,Ndufa6,Miox,Ndufb4,Ehhadh,Ndufa5,Acy1,Dcxr,Ndufb8,Echs1,Trak2,Agpat2,Hdc,Idh3b,Acss1,Car3,Mccc1,Mecr,Hpd,Acads,Mmab,Gstk1,Ndufc2,Dgat2,Bcat2,Ears2,Uqcrc2,Ebp,Pdha1,Acsl1,Cox7a2,Pccb,Acsm1,Idi2,Scd1,Ndufb7,Acaa2,Colgalt2,H2-Ke6,Lipt1,Pcca,Kmo,Dmgdh,Cox10…	3.9e-41	1.29e-38
KEGG	10090	Kid. Medulla	Downregulated	mmu04714	Thermogenesis	40	225	10090.ENSMUSP00000000175,10090.ENSMUSP00000003207,10090.ENSMUSP00000005647,10090.ENSMUSP00000013737,10090.ENSMUSP00000016571,10090.ENSMUSP00000017332,10090.ENSMUSP00000021993,10090.ENSMUSP00000023085,10090.ENSMUSP00000023514,10090.ENSMUSP00000023851,10090.ENSMUSP00000026222,10090.ENSMUSP00000026572,10090.ENSMUSP00000029925,10090.ENSMUSP00000032882,10090.ENSMUSP00000033176,10090.ENSMUSP00000034046…	Sdhd,Lipe,Ndufs3,Ndufs2,Ndufa1,Coa3,Uqcrb,Ndufa6,Ndufb4,Ndufa5,Ndufb8,Hras,Ndufaf4,Ndufc2,Uqcrc2,Acsl1,Ucp1,Cox7a2,Slc25a20,Ndufb7,Cox10,Uqcrfs1,Cox6a1,Atp5l,Uqcrq,Uqcr10,Ndufa3,mt-Nd2,mt-Atp8,mt-Co3,Cox7a1,Cpt1b,Atp5c1,Adcy5,Cox18,Adcy9,Ndufb5,Mgll,Plin1,Ndufs8	5.66e-23	9.39e-21
KEGG	10090	Kid. Medulla	Downregulated	mmu00190	Oxidative phosphorylation	28	130	10090.ENSMUSP00000000175,10090.ENSMUSP00000005647,10090.ENSMUSP00000007340,10090.ENSMUSP00000013737,10090.ENSMUSP00000016571,10090.ENSMUSP00000021993,10090.ENSMUSP00000023085,10090.ENSMUSP00000023514,10090.ENSMUSP00000023851,10090.ENSMUSP00000026222,10090.ENSMUSP00000032882,10090.ENSMUSP00000033176,10090.ENSMUSP00000034881,10090.ENSMUSP00000037341,10090.ENSMUSP00000040138,10090.ENSMUSP00000045284…	Sdhd,Ndufs3,Atp12a,Ndufs2,Ndufa1,Uqcrb,Ndufa6,Ndufb4,Ndufa5,Ndufb8,Ndufc2,Uqcrc2,Cox7a2,Ndufb7,Cox10,Uqcrfs1,Cox6a1,Atp5l,Uqcrq,Uqcr10,Ndufa3,mt-Nd2,mt-Atp8,mt-Co3,Cox7a1,Atp5c1,Ndufb5,Ndufs8	2.52e-18	2.78e-16
KEGG	10090	Kid. Medulla	Downregulated	mmu00640	Propanoate metabolism	17	34	10090.ENSMUSP00000020034,10090.ENSMUSP00000023559,10090.ENSMUSP00000026538,10090.ENSMUSP00000028944,10090.ENSMUSP00000031524,10090.ENSMUSP00000035116,10090.ENSMUSP00000038763,10090.ENSMUSP00000045606,10090.ENSMUSP00000047855,10090.ENSMUSP00000071292,10090.ENSMUSP00000099490,10090.ENSMUSP00000099642,10090.ENSMUSP00000120976,10090.ENSMUSP00000123765,10090.ENSMUSP00000128209,10090.ENSMUSP00000130941…	Echdc1,Ehhadh,Echs1,Acss1,Acads,Pccb,Pcca,Hibch,Mcee,Bckdha,Acaca,Acacb,Hadha,Sucla2,Acss3,Mmut,Bckdhb	1.38e-16	1.14e-14
KEGG	10090	Kid. Medulla	Downregulated	mmu00280	Valine, leucine and isoleucine degradation	19	55	10090.ENSMUSP00000021913,10090.ENSMUSP00000022148,10090.ENSMUSP00000023559,10090.ENSMUSP00000026538,10090.ENSMUSP00000029259,10090.ENSMUSP00000031524,10090.ENSMUSP00000033098,10090.ENSMUSP00000035116,10090.ENSMUSP00000037348,10090.ENSMUSP00000038763,10090.ENSMUSP00000045606,10090.ENSMUSP00000047855,10090.ENSMUSP00000054370,10090.ENSMUSP00000071292,10090.ENSMUSP00000106318,10090.ENSMUSP00000110434…	Auh,Mccc2,Ehhadh,Echs1,Mccc1,Acads,Bcat2,Pccb,Acaa2,Pcca,Hibch,Mcee,Acad8,Bckdha,Oxct1,Hadhb,Hadha,Mmut,Bckdhb	5.31e-16	3.46e-14
KEGG	10090	Kid. Medulla	Downregulated	mmu04512	ECM-receptor interaction	22	86	10090.ENSMUSP00000001547,10090.ENSMUSP00000002979,10090.ENSMUSP00000015791,10090.ENSMUSP00000019992,10090.ENSMUSP00000021028,10090.ENSMUSP00000027752,10090.ENSMUSP00000031668,10090.ENSMUSP00000033898,10090.ENSMUSP00000033899,10090.ENSMUSP00000043250,10090.ENSMUSP00000057563,10090.ENSMUSP00000069087,10090.ENSMUSP00000071627,10090.ENSMUSP00000084282,10090.ENSMUSP00000088670,10090.ENSMUSP00000096040…	Col1a1,Lamb1,Lama5,Lama4,Itgb3,Lamc1,Col1a2,Col4a1,Col4a2,Fras1,Gp1ba,Lamb2,Frem1,Col4a4,Frem2,Col6a6,Col4a6,Itga2b,Col4a5,Col4a3,Tnxb,Hspg2	5.21e-16	3.46e-14
KEGG	10090	Kid. Medulla	Downregulated	mmu05012	Parkinson disease	29	238	10090.ENSMUSP00000000175,10090.ENSMUSP00000005647,10090.ENSMUSP00000013737,10090.ENSMUSP00000016571,10090.ENSMUSP00000021993,10090.ENSMUSP00000023085,10090.ENSMUSP00000023514,10090.ENSMUSP00000023851,10090.ENSMUSP00000026222,10090.ENSMUSP00000032882,10090.ENSMUSP00000033176,10090.ENSMUSP00000034881,10090.ENSMUSP00000037341,10090.ENSMUSP00000045284,10090.ENSMUSP00000047661,10090.ENSMUSP00000053145…	Sdhd,Ndufs3,Ndufs2,Ndufa1,Uqcrb,Ndufa6,Ndufb4,Ndufa5,Ndufb8,Ndufc2,Uqcrc2,Cox7a2,Ndufb7,Uqcrfs1,Cox6a1,Uqcrq,Uqcr10,Camk2g,Ndufa3,mt-Nd2,mt-Atp8,mt-Co3,Slc25a31,Cox7a1,Snca,Atp5c1,Adcy5,Ndufb5,Ndufs8	3.65e-13	1.73e-11
KEGG	10090	Kid. Medulla	Downregulated	mmu04932	Non-alcoholic fatty liver disease	23	147	10090.ENSMUSP00000000175,10090.ENSMUSP00000005647,10090.ENSMUSP00000013737,10090.ENSMUSP00000016571,10090.ENSMUSP00000021993,10090.ENSMUSP00000023085,10090.ENSMUSP00000023514,10090.ENSMUSP00000023851,10090.ENSMUSP00000026222,10090.ENSMUSP00000032882,10090.ENSMUSP00000033176,10090.ENSMUSP00000034881,10090.ENSMUSP00000037341,10090.ENSMUSP00000045284,10090.ENSMUSP00000047661,10090.ENSMUSP00000053145…	Sdhd,Ndufs3,Ndufs2,Ndufa1,Uqcrb,Ndufa6,Ndufb4,Ndufa5,Ndufb8,Ndufc2,Uqcrc2,Cox7a2,Ndufb7,Uqcrfs1,Cox6a1,Uqcrq,Uqcr10,Lep,Ndufa3,mt-Co3,Cox7a1,Ndufb5,Ndufs8	1.07e-12	4.46e-11
KEGG	10090	Kid. Medulla	Downregulated	mmu04974	Protein digestion and absorption	20	106	10090.ENSMUSP00000001547,10090.ENSMUSP00000004201,10090.ENSMUSP00000015138,10090.ENSMUSP00000022048,10090.ENSMUSP00000024707,10090.ENSMUSP00000027863,10090.ENSMUSP00000031668,10090.ENSMUSP00000033898,10090.ENSMUSP00000033899,10090.ENSMUSP00000079691,10090.ENSMUSP00000080866,10090.ENSMUSP00000083620,10090.ENSMUSP00000084282,10090.ENSMUSP00000085192,10090.ENSMUSP00000096040,10090.ENSMUSP00000098765…	Col1a1,Col5a3,Eln,Slc6a19,Mep1a,Atp1b1,Col1a2,Col4a1,Col4a2,Atp1a3,Mep1b,Col5a2,Col4a4,Col3a1,Col6a6,Col4a6,Slc1a5,Col4a5,Col4a3,Slc8a1	1.59e-12	5.85e-11
KEGG	10090	Kid. Medulla	Downregulated	mmu01200	Carbon metabolism	21	122	10090.ENSMUSP00000000175,10090.ENSMUSP00000005826,10090.ENSMUSP00000020277,10090.ENSMUSP00000020768,10090.ENSMUSP00000022268,10090.ENSMUSP00000023559,10090.ENSMUSP00000026538,10090.ENSMUSP00000028892,10090.ENSMUSP00000028944,10090.ENSMUSP00000031524,10090.ENSMUSP00000033662,10090.ENSMUSP00000035116,10090.ENSMUSP00000038763,10090.ENSMUSP00000045606,10090.ENSMUSP00000047855,10090.ENSMUSP00000056502…	Sdhd,Cs,Hkdc1,Pgam2,Pdhb,Ehhadh,Echs1,Idh3b,Acss1,Acads,Pdha1,Pccb,Pcca,Hibch,Mcee,Idh3g,Idh2,Hadha,Sucla2,Idh3a,Mmut	2.08e-12	6.91e-11
KEGG	10090	Kid. Medulla	Downregulated	mmu05020	Prion disease	29	263	10090.ENSMUSP00000000058,10090.ENSMUSP00000000175,10090.ENSMUSP00000005647,10090.ENSMUSP00000007799,10090.ENSMUSP00000013737,10090.ENSMUSP00000016571,10090.ENSMUSP00000021993,10090.ENSMUSP00000023085,10090.ENSMUSP00000023514,10090.ENSMUSP00000023851,10090.ENSMUSP00000026222,10090.ENSMUSP00000027752,10090.ENSMUSP00000032882,10090.ENSMUSP00000033176,10090.ENSMUSP00000034881,10090.ENSMUSP00000037341…	Cav2,Sdhd,Ndufs3,Cav1,Ndufs2,Ndufa1,Uqcrb,Ndufa6,Ndufb4,Ndufa5,Ndufb8,Lamc1,Ndufc2,Uqcrc2,Cox7a2,Ndufb7,Uqcrfs1,Cox6a1,Uqcrq,Uqcr10,Ndufa3,mt-Nd2,mt-Atp8,mt-Co3,Slc25a31,Cox7a1,Atp5c1,Ndufb5,Ndufs8	3.49e-12	1.05e-10
KEGG	10090	Kid. Medulla	Downregulated	mmu01212	Fatty acid metabolism	15	61	10090.ENSMUSP00000022311,10090.ENSMUSP00000023559,10090.ENSMUSP00000026538,10090.ENSMUSP00000030742,10090.ENSMUSP00000031524,10090.ENSMUSP00000034046,10090.ENSMUSP00000036936,10090.ENSMUSP00000037348,10090.ENSMUSP00000038069,10090.ENSMUSP00000052872,10090.ENSMUSP00000099490,10090.ENSMUSP00000099634,10090.ENSMUSP00000104936,10090.ENSMUSP00000110434,10090.ENSMUSP00000120976	Oxsm,Ehhadh,Echs1,Mecr,Acads,Acsl1,Scd1,Acaa2,H2-Ke6,Fasn,Acaca,Acadvl,Cpt1b,Hadhb,Hadha	3.96e-11	1.1e-09
KEGG	10090	Kid. Medulla	Downregulated	mmu05016	Huntington disease	29	297	10090.ENSMUSP00000000175,10090.ENSMUSP00000005647,10090.ENSMUSP00000007216,10090.ENSMUSP00000013737,10090.ENSMUSP00000016571,10090.ENSMUSP00000021993,10090.ENSMUSP00000023085,10090.ENSMUSP00000023514,10090.ENSMUSP00000023851,10090.ENSMUSP00000026222,10090.ENSMUSP00000032882,10090.ENSMUSP00000033176,10090.ENSMUSP00000034146,10090.ENSMUSP00000034881,10090.ENSMUSP00000037341,10090.ENSMUSP00000045284…	Sdhd,Ndufs3,Ap2m1,Ndufs2,Ndufa1,Uqcrb,Ndufa6,Ndufb4,Ndufa5,Ndufb8,Ndufc2,Uqcrc2,Ucp1,Cox7a2,Ndufb7,Uqcrfs1,Cox6a1,Uqcrq,Uqcr10,Ndufa3,mt-Nd2,mt-Atp8,mt-Co3,Slc25a31,Tfam,Cox7a1,Atp5c1,Ndufb5,Ndufs8	5.2e-11	1.33e-09
KEGG	10090	Kid. Medulla	Downregulated	mmu05010	Alzheimer disease	29	360	10090.ENSMUSP00000000175,10090.ENSMUSP00000005647,10090.ENSMUSP00000013737,10090.ENSMUSP00000015712,10090.ENSMUSP00000016571,10090.ENSMUSP00000021993,10090.ENSMUSP00000023085,10090.ENSMUSP00000023514,10090.ENSMUSP00000023851,10090.ENSMUSP00000026222,10090.ENSMUSP00000026572,10090.ENSMUSP00000032882,10090.ENSMUSP00000033176,10090.ENSMUSP00000034881,10090.ENSMUSP00000037341,10090.ENSMUSP00000045284…	Sdhd,Ndufs3,Ndufs2,Lpl,Ndufa1,Uqcrb,Ndufa6,Ndufb4,Ndufa5,Ndufb8,Hras,Ndufc2,Uqcrc2,Cox7a2,Ndufb7,Uqcrfs1,Cox6a1,Uqcrq,Uqcr10,Ndufa3,mt-Nd2,mt-Atp8,mt-Co3,Slc25a31,Cox7a1,Snca,Atp5c1,Ndufb5,Ndufs8	3.25e-09	7.71e-08
KEGG	10090	Kid. Medulla	Downregulated	mmu00020	Citrate cycle (TCA cycle)	10	32	10090.ENSMUSP00000000175,10090.ENSMUSP00000005826,10090.ENSMUSP00000022268,10090.ENSMUSP00000028892,10090.ENSMUSP00000033662,10090.ENSMUSP00000056502,10090.ENSMUSP00000103007,10090.ENSMUSP00000103012,10090.ENSMUSP00000123765,10090.ENSMUSP00000127526	Sdhd,Cs,Pdhb,Idh3b,Pdha1,Idh3g,Idh2,Acly,Sucla2,Idh3a	1.07e-08	2.38e-07
KEGG	10090	Kid. Medulla	Downregulated	mmu05146	Amoebiasis	15	102	10090.ENSMUSP00000001547,10090.ENSMUSP00000002979,10090.ENSMUSP00000015791,10090.ENSMUSP00000019992,10090.ENSMUSP00000027241,10090.ENSMUSP00000027752,10090.ENSMUSP00000031668,10090.ENSMUSP00000033898,10090.ENSMUSP00000033899,10090.ENSMUSP00000069087,10090.ENSMUSP00000084282,10090.ENSMUSP00000085192,10090.ENSMUSP00000098765,10090.ENSMUSP00000108553,10090.ENSMUSP00000109084	Col1a1,Lamb1,Lama5,Lama4,Il1r1,Lamc1,Col1a2,Col4a1,Col4a2,Lamb2,Col4a4,Col3a1,Col4a6,Col4a5,Col4a3	2.03e-08	4.21e-07
KEGG	10090	Kid. Medulla	Downregulated	mmu04510	Focal adhesion	20	196	10090.ENSMUSP00000000058,10090.ENSMUSP00000001547,10090.ENSMUSP00000002979,10090.ENSMUSP00000007799,10090.ENSMUSP00000015791,10090.ENSMUSP00000019992,10090.ENSMUSP00000021028,10090.ENSMUSP00000026572,10090.ENSMUSP00000027752,10090.ENSMUSP00000031668,10090.ENSMUSP00000033898,10090.ENSMUSP00000033899,10090.ENSMUSP00000069087,10090.ENSMUSP00000084282,10090.ENSMUSP00000096040,10090.ENSMUSP00000098765…	Cav2,Col1a1,Lamb1,Cav1,Lama5,Lama4,Itgb3,Hras,Lamc1,Col1a2,Col4a1,Col4a2,Lamb2,Col4a4,Col6a6,Col4a6,Itga2b,Col4a5,Col4a3,Tnxb	2.72e-08	5.32e-07
KEGG	10090	Kid. Medulla	Downregulated	mmu00071	Fatty acid degradation	11	50	10090.ENSMUSP00000023559,10090.ENSMUSP00000026538,10090.ENSMUSP00000031524,10090.ENSMUSP00000034046,10090.ENSMUSP00000037348,10090.ENSMUSP00000099634,10090.ENSMUSP00000104936,10090.ENSMUSP00000110434,10090.ENSMUSP00000120976,10090.ENSMUSP00000131735,10090.ENSMUSP00000157291	Ehhadh,Echs1,Acads,Acsl1,Acaa2,Acadvl,Cpt1b,Hadhb,Hadha,Eci2,Eci1	4.41e-08	8.13e-07
KEGG	10090	Kid. Medulla	Downregulated	mmu00650	Butanoate metabolism	9	28	10090.ENSMUSP00000021370,10090.ENSMUSP00000023559,10090.ENSMUSP00000026538,10090.ENSMUSP00000031524,10090.ENSMUSP00000036140,10090.ENSMUSP00000063416,10090.ENSMUSP00000106318,10090.ENSMUSP00000110882,10090.ENSMUSP00000120976	L2hgdh,Ehhadh,Echs1,Acads,Acsm1,Acsm5,Oxct1,Bdh1,Hadha	4.83e-08	8.44e-07
KEGG	10090	Kid. Medulla	Downregulated	mmu04260	Cardiac muscle contraction	13	84	10090.ENSMUSP00000021993,10090.ENSMUSP00000027863,10090.ENSMUSP00000033176,10090.ENSMUSP00000034881,10090.ENSMUSP00000045284,10090.ENSMUSP00000047661,10090.ENSMUSP00000053145,10090.ENSMUSP00000054856,10090.ENSMUSP00000079691,10090.ENSMUSP00000080997,10090.ENSMUSP00000096193,10090.ENSMUSP00000110371,10090.ENSMUSP00000132809	Uqcrb,Atp1b1,Uqcrc2,Cox7a2,Uqcrfs1,Cox6a1,Uqcrq,Uqcr10,Atp1a3,mt-Co3,Cox7a1,Cacnb2,Slc8a1	1.05e-07	1.74e-06
KEGG	10090	Kid. Medulla	Downregulated	mmu03320	PPAR signaling pathway	13	86	10090.ENSMUSP00000002360,10090.ENSMUSP00000015712,10090.ENSMUSP00000023559,10090.ENSMUSP00000029041,10090.ENSMUSP00000030136,10090.ENSMUSP00000034046,10090.ENSMUSP00000034146,10090.ENSMUSP00000034267,10090.ENSMUSP00000036585,10090.ENSMUSP00000036936,10090.ENSMUSP00000057595,10090.ENSMUSP00000104936,10090.ENSMUSP00000146028	Angptl4,Lpl,Ehhadh,Fabp4,Aqp7,Acsl1,Ucp1,Slc27a1,Rxrb,Scd1,Slc27a2,Cpt1b,Plin1	1.34e-07	2.12e-06
KEGG	10090	Kid. Medulla	Downregulated	mmu04723	Retrograde endocannabinoid signaling	16	144	10090.ENSMUSP00000005647,10090.ENSMUSP00000013737,10090.ENSMUSP00000016571,10090.ENSMUSP00000023085,10090.ENSMUSP00000023514,10090.ENSMUSP00000023851,10090.ENSMUSP00000026222,10090.ENSMUSP00000032882,10090.ENSMUSP00000037341,10090.ENSMUSP00000075953,10090.ENSMUSP00000080992,10090.ENSMUSP00000110563,10090.ENSMUSP00000113498,10090.ENSMUSP00000114963,10090.ENSMUSP00000127374,10090.ENSMUSP00000158541	Ndufs3,Ndufs2,Ndufa1,Ndufa6,Ndufb4,Ndufa5,Ndufb8,Ndufc2,Ndufb7,Ndufa3,mt-Nd2,Adcy5,Adcy9,Ndufb5,Mgll,Ndufs8	2.35e-07	3.55e-06
KEGG	10090	Kid. Medulla	Downregulated	mmu05222	Small cell lung cancer	13	92	10090.ENSMUSP00000002979,10090.ENSMUSP00000015791,10090.ENSMUSP00000019992,10090.ENSMUSP00000027752,10090.ENSMUSP00000033898,10090.ENSMUSP00000033899,10090.ENSMUSP00000036585,10090.ENSMUSP00000069087,10090.ENSMUSP00000084282,10090.ENSMUSP00000098765,10090.ENSMUSP00000099375,10090.ENSMUSP00000108553,10090.ENSMUSP00000109084	Lamb1,Lama5,Lama4,Lamc1,Col4a1,Col4a2,Rxrb,Lamb2,Col4a4,Col4a6,Itga2b,Col4a5,Col4a3	2.7e-07	3.9e-06
KEGG	10090	Kid. Medulla	Downregulated	mmu00061	Fatty acid biosynthesis	7	18	10090.ENSMUSP00000022311,10090.ENSMUSP00000030742,10090.ENSMUSP00000034046,10090.ENSMUSP00000038069,10090.ENSMUSP00000052872,10090.ENSMUSP00000099490,10090.ENSMUSP00000099642	Oxsm,Mecr,Acsl1,H2-Ke6,Fasn,Acaca,Acacb	5.44e-07	7.53e-06
KEGG	10090	Kid. Medulla	Downregulated	mmu05014	Amyotrophic lateral sclerosis	25	362	10090.ENSMUSP00000000175,10090.ENSMUSP00000005647,10090.ENSMUSP00000013737,10090.ENSMUSP00000016571,10090.ENSMUSP00000021993,10090.ENSMUSP00000023085,10090.ENSMUSP00000023514,10090.ENSMUSP00000023851,10090.ENSMUSP00000026222,10090.ENSMUSP00000032882,10090.ENSMUSP00000033176,10090.ENSMUSP00000034881,10090.ENSMUSP00000037341,10090.ENSMUSP00000045284,10090.ENSMUSP00000047661,10090.ENSMUSP00000053145…	Sdhd,Ndufs3,Ndufs2,Ndufa1,Uqcrb,Ndufa6,Ndufb4,Ndufa5,Ndufb8,Ndufc2,Uqcrc2,Cox7a2,Ndufb7,Uqcrfs1,Cox6a1,Uqcrq,Uqcr10,Ndufa3,mt-Nd2,mt-Atp8,mt-Co3,Cox7a1,Atp5c1,Ndufb5,Ndufs8	6.11e-07	8.11e-06
KEGG	10090	Kid. Medulla	Downregulated	mmu01210	2-Oxocarboxylic acid metabolism	7	20	10090.ENSMUSP00000005826,10090.ENSMUSP00000024031,10090.ENSMUSP00000028892,10090.ENSMUSP00000033098,10090.ENSMUSP00000056502,10090.ENSMUSP00000103007,10090.ENSMUSP00000127526	Cs,Acy1,Idh3b,Bcat2,Idh3g,Idh2,Idh3a	9.7e-07	1.24e-05
KEGG	10090	Kid. Medulla	Downregulated	mmu04146	Peroxisome	11	85	10090.ENSMUSP00000023559,10090.ENSMUSP00000031472,10090.ENSMUSP00000031897,10090.ENSMUSP00000034046,10090.ENSMUSP00000037929,10090.ENSMUSP00000057595,10090.ENSMUSP00000099383,10090.ENSMUSP00000099919,10090.ENSMUSP00000103007,10090.ENSMUSP00000129311,10090.ENSMUSP00000131735	Ehhadh,Pxmp2,Gstk1,Acsl1,Mpv17l2,Slc27a2,Acot8,Crat,Idh2,Pex2,Eci2	4.85e-06	5.96e-05
KEGG	10090	Kid. Medulla	Downregulated	mmu00630	Glyoxylate and dicarboxylate metabolism	7	31	10090.ENSMUSP00000005826,10090.ENSMUSP00000028944,10090.ENSMUSP00000035116,10090.ENSMUSP00000038763,10090.ENSMUSP00000047855,10090.ENSMUSP00000083375,10090.ENSMUSP00000130941	Cs,Acss1,Pccb,Pcca,Mcee,Glul,Mmut	1.13e-05	0.00013
KEGG	10090	Kid. Medulla	Downregulated	mmu01230	Biosynthesis of amino acids	10	77	10090.ENSMUSP00000005826,10090.ENSMUSP00000020768,10090.ENSMUSP00000024031,10090.ENSMUSP00000028892,10090.ENSMUSP00000033098,10090.ENSMUSP00000056502,10090.ENSMUSP00000083375,10090.ENSMUSP00000099904,10090.ENSMUSP00000103007,10090.ENSMUSP00000127526	Cs,Pgam2,Acy1,Idh3b,Bcat2,Idh3g,Glul,Ass1,Idh2,Idh3a	1.27e-05	0.00015
KEGG	10090	Kid. Medulla	Downregulated	mmu04933	AGE-RAGE signaling pathway in diabetic complications	11	99	10090.ENSMUSP00000001547,10090.ENSMUSP00000026572,10090.ENSMUSP00000031668,10090.ENSMUSP00000033898,10090.ENSMUSP00000033899,10090.ENSMUSP00000084282,10090.ENSMUSP00000085192,10090.ENSMUSP00000098765,10090.ENSMUSP00000108553,10090.ENSMUSP00000109084,10090.ENSMUSP00000130604	Col1a1,Hras,Col1a2,Col4a1,Col4a2,Col4a4,Col3a1,Col4a6,Col4a5,Col4a3,Plce1	1.81e-05	0.0002
KEGG	10090	Kid. Medulla	Downregulated	mmu04926	Relaxin signaling pathway	12	127	10090.ENSMUSP00000001547,10090.ENSMUSP00000026572,10090.ENSMUSP00000031668,10090.ENSMUSP00000033898,10090.ENSMUSP00000033899,10090.ENSMUSP00000084282,10090.ENSMUSP00000085192,10090.ENSMUSP00000098765,10090.ENSMUSP00000108553,10090.ENSMUSP00000109084,10090.ENSMUSP00000110563,10090.ENSMUSP00000113498	Col1a1,Hras,Col1a2,Col4a1,Col4a2,Col4a4,Col3a1,Col4a6,Col4a5,Col4a3,Adcy5,Adcy9	3.36e-05	0.00036
KEGG	10090	Kid. Medulla	Downregulated	mmu05230	Central carbon metabolism in cancer	9	69	10090.ENSMUSP00000006669,10090.ENSMUSP00000020277,10090.ENSMUSP00000020768,10090.ENSMUSP00000022268,10090.ENSMUSP00000026572,10090.ENSMUSP00000030398,10090.ENSMUSP00000033662,10090.ENSMUSP00000103007,10090.ENSMUSP00000104136	Pdk1,Hkdc1,Pgam2,Pdhb,Hras,Slc2a1,Pdha1,Idh2,Slc1a5	3.34e-05	0.00036
KEGG	10090	Kid. Medulla	Downregulated	mmu00062	Fatty acid elongation	6	29	10090.ENSMUSP00000021652,10090.ENSMUSP00000026538,10090.ENSMUSP00000030742,10090.ENSMUSP00000037348,10090.ENSMUSP00000110434,10090.ENSMUSP00000120976	Acot4,Echs1,Mecr,Acaa2,Hadhb,Hadha	7.46e-05	0.00075
KEGG	10090	Kid. Medulla	Downregulated	mmu00410	beta-Alanine metabolism	6	30	10090.ENSMUSP00000023559,10090.ENSMUSP00000026538,10090.ENSMUSP00000031524,10090.ENSMUSP00000045606,10090.ENSMUSP00000099394,10090.ENSMUSP00000120976	Ehhadh,Echs1,Acads,Hibch,Aoc3,Hadha	8.79e-05	0.00086
KEGG	10090	Kid. Medulla	Downregulated	mmu04151	PI3K-Akt signaling pathway	20	353	10090.ENSMUSP00000001547,10090.ENSMUSP00000002979,10090.ENSMUSP00000015791,10090.ENSMUSP00000019992,10090.ENSMUSP00000021028,10090.ENSMUSP00000026572,10090.ENSMUSP00000027752,10090.ENSMUSP00000031668,10090.ENSMUSP00000033898,10090.ENSMUSP00000033899,10090.ENSMUSP00000069087,10090.ENSMUSP00000084282,10090.ENSMUSP00000096040,10090.ENSMUSP00000098765,10090.ENSMUSP00000099375,10090.ENSMUSP00000103197…	Col1a1,Lamb1,Lama5,Lama4,Itgb3,Hras,Lamc1,Col1a2,Col4a1,Col4a2,Lamb2,Col4a4,Col6a6,Col4a6,Itga2b,Lpar1,Col4a5,Eif4e2,Col4a3,Tnxb	0.00011	0.0011
KEGG	10090	Kid. Medulla	Downregulated	mmu04910	Insulin signaling pathway	11	133	10090.ENSMUSP00000003207,10090.ENSMUSP00000018710,10090.ENSMUSP00000020277,10090.ENSMUSP00000026572,10090.ENSMUSP00000039797,10090.ENSMUSP00000052872,10090.ENSMUSP00000071231,10090.ENSMUSP00000099490,10090.ENSMUSP00000099642,10090.ENSMUSP00000103884,10090.ENSMUSP00000108859	Lipe,Slc2a4,Hkdc1,Hras,Prkar2b,Fasn,Pygl,Acaca,Acacb,Prkci,Eif4e2	0.00021	0.0019
KEGG	10090	Kid. Medulla	Downregulated	mmu05165	Human papillomavirus infection	19	342	10090.ENSMUSP00000001547,10090.ENSMUSP00000002979,10090.ENSMUSP00000015791,10090.ENSMUSP00000019992,10090.ENSMUSP00000021028,10090.ENSMUSP00000026572,10090.ENSMUSP00000027752,10090.ENSMUSP00000031668,10090.ENSMUSP00000033898,10090.ENSMUSP00000033899,10090.ENSMUSP00000069087,10090.ENSMUSP00000084282,10090.ENSMUSP00000096040,10090.ENSMUSP00000098765,10090.ENSMUSP00000099375,10090.ENSMUSP00000103884…	Col1a1,Lamb1,Lama5,Lama4,Itgb3,Hras,Lamc1,Col1a2,Col4a1,Col4a2,Lamb2,Col4a4,Col6a6,Col4a6,Itga2b,Prkci,Col4a5,Col4a3,Tnxb	0.00021	0.0019
KEGG	10090	Kid. Medulla	Downregulated	mmu04923	Regulation of lipolysis in adipocytes	7	55	10090.ENSMUSP00000003207,10090.ENSMUSP00000029041,10090.ENSMUSP00000030136,10090.ENSMUSP00000110563,10090.ENSMUSP00000113498,10090.ENSMUSP00000127374,10090.ENSMUSP00000146028	Lipe,Fabp4,Aqp7,Adcy5,Adcy9,Mgll,Plin1	0.00029	0.0025
KEGG	10090	Kid. Medulla	Downregulated	mmu04961	Endocrine and other factor-regulated calcium reabsorption	7	58	10090.ENSMUSP00000007216,10090.ENSMUSP00000027863,10090.ENSMUSP00000029876,10090.ENSMUSP00000077899,10090.ENSMUSP00000079691,10090.ENSMUSP00000113498,10090.ENSMUSP00000132809	Ap2m1,Atp1b1,Calb1,Kl,Atp1a3,Adcy9,Slc8a1	0.00039	0.0033
KEGG	10090	Kid. Medulla	Downregulated	mmu04976	Bile secretion	9	98	10090.ENSMUSP00000022176,10090.ENSMUSP00000027863,10090.ENSMUSP00000030398,10090.ENSMUSP00000078088,10090.ENSMUSP00000078972,10090.ENSMUSP00000079691,10090.ENSMUSP00000084234,10090.ENSMUSP00000110563,10090.ENSMUSP00000113498	Hmgcr,Atp1b1,Slc2a1,Aqp4,Slc4a2,Atp1a3,Slc22a7,Adcy5,Adcy9	0.00039	0.0033
KEGG	10090	Kid. Medulla	Downregulated	mmu04922	Glucagon signaling pathway	9	99	10090.ENSMUSP00000020768,10090.ENSMUSP00000022268,10090.ENSMUSP00000030398,10090.ENSMUSP00000033662,10090.ENSMUSP00000071231,10090.ENSMUSP00000071720,10090.ENSMUSP00000099490,10090.ENSMUSP00000099642,10090.ENSMUSP00000104936	Pgam2,Pdhb,Slc2a1,Pdha1,Pygl,Camk2g,Acaca,Acacb,Cpt1b	0.00042	0.0034
KEGG	10090	Kid. Medulla	Downregulated	mmu04971	Gastric acid secretion	7	69	10090.ENSMUSP00000027863,10090.ENSMUSP00000063734,10090.ENSMUSP00000071720,10090.ENSMUSP00000078972,10090.ENSMUSP00000079691,10090.ENSMUSP00000110563,10090.ENSMUSP00000113498	Atp1b1,Ezr,Camk2g,Slc4a2,Atp1a3,Adcy5,Adcy9	0.001	0.0079
KEGG	10090	Kid. Medulla	Downregulated	mmu04920	Adipocytokine signaling pathway	7	71	10090.ENSMUSP00000018710,10090.ENSMUSP00000030398,10090.ENSMUSP00000034046,10090.ENSMUSP00000036585,10090.ENSMUSP00000067046,10090.ENSMUSP00000099642,10090.ENSMUSP00000104936	Slc2a4,Slc2a1,Acsl1,Rxrb,Lep,Acacb,Cpt1b	0.0012	0.0088
KEGG	10090	Kid. Medulla	Downregulated	mmu04978	Mineral absorption	6	51	10090.ENSMUSP00000006638,10090.ENSMUSP00000022048,10090.ENSMUSP00000027863,10090.ENSMUSP00000079691,10090.ENSMUSP00000132809,10090.ENSMUSP00000153038	Slc34a3,Slc6a19,Atp1b1,Atp1a3,Slc8a1,Slc34a1	0.0011	0.0088
KEGG	10090	Kid. Medulla	Downregulated	mmu04611	Platelet activation	9	120	10090.ENSMUSP00000001547,10090.ENSMUSP00000021028,10090.ENSMUSP00000031668,10090.ENSMUSP00000057563,10090.ENSMUSP00000085192,10090.ENSMUSP00000099375,10090.ENSMUSP00000103884,10090.ENSMUSP00000110563,10090.ENSMUSP00000113498	Col1a1,Itgb3,Col1a2,Gp1ba,Col3a1,Itga2b,Prkci,Adcy5,Adcy9	0.0015	0.011
KEGG	10090	Kid. Medulla	Downregulated	mmu00260	Glycine, serine and threonine metabolism	5	38	10090.ENSMUSP00000006544,10090.ENSMUSP00000020768,10090.ENSMUSP00000039663,10090.ENSMUSP00000099394,10090.ENSMUSP00000117014	Gcat,Pgam2,Dmgdh,Aoc3,Alas1	0.0019	0.0133
KEGG	10090	Kid. Medulla	Downregulated	mmu04152	AMPK signaling pathway	9	124	10090.ENSMUSP00000003207,10090.ENSMUSP00000018710,10090.ENSMUSP00000022176,10090.ENSMUSP00000036936,10090.ENSMUSP00000052872,10090.ENSMUSP00000067046,10090.ENSMUSP00000099490,10090.ENSMUSP00000099642,10090.ENSMUSP00000104936	Lipe,Slc2a4,Hmgcr,Scd1,Fasn,Lep,Acaca,Acacb,Cpt1b	0.0018	0.0133
KEGG	10090	Kid. Medulla	Downregulated	mmu00620	Pyruvate metabolism	5	39	10090.ENSMUSP00000022268,10090.ENSMUSP00000028944,10090.ENSMUSP00000033662,10090.ENSMUSP00000099490,10090.ENSMUSP00000099642	Pdhb,Acss1,Pdha1,Acaca,Acacb	0.0021	0.0144
KEGG	10090	Kid. Medulla	Downregulated	mmu04911	Insulin secretion	7	80	10090.ENSMUSP00000027863,10090.ENSMUSP00000030398,10090.ENSMUSP00000071720,10090.ENSMUSP00000079691,10090.ENSMUSP00000105719,10090.ENSMUSP00000110563,10090.ENSMUSP00000113498	Atp1b1,Slc2a1,Camk2g,Atp1a3,Rab3a,Adcy5,Adcy9	0.0022	0.0149
KEGG	10090	Kid. Medulla	Downregulated	mmu00860	Porphyrin and chlorophyll metabolism	5	41	10090.ENSMUSP00000031560,10090.ENSMUSP00000033159,10090.ENSMUSP00000040138,10090.ENSMUSP00000107743,10090.ENSMUSP00000117014	Mmab,Ears2,Cox10,Hccs,Alas1	0.0025	0.0169
KEGG	10090	Kid. Medulla	Downregulated	mmu05200	Pathways in cancer	22	527	10090.ENSMUSP00000002979,10090.ENSMUSP00000015791,10090.ENSMUSP00000019992,10090.ENSMUSP00000026572,10090.ENSMUSP00000027752,10090.ENSMUSP00000028355,10090.ENSMUSP00000030398,10090.ENSMUSP00000033898,10090.ENSMUSP00000033899,10090.ENSMUSP00000036585,10090.ENSMUSP00000069087,10090.ENSMUSP00000071720,10090.ENSMUSP00000082154,10090.ENSMUSP00000084282,10090.ENSMUSP00000098765,10090.ENSMUSP00000099375…	Lamb1,Lama5,Lama4,Hras,Lamc1,Pax8,Slc2a1,Col4a1,Col4a2,Rxrb,Lamb2,Camk2g,Arnt2,Col4a4,Col4a6,Itga2b,Lpar1,Col4a5,Col4a3,Adcy5,Adcy9,Gstt4	0.0026	0.0172
KEGG	10090	Kid. Medulla	Downregulated	mmu04066	HIF-1 signaling pathway	8	110	10090.ENSMUSP00000006669,10090.ENSMUSP00000020277,10090.ENSMUSP00000022268,10090.ENSMUSP00000023486,10090.ENSMUSP00000030398,10090.ENSMUSP00000033662,10090.ENSMUSP00000071720,10090.ENSMUSP00000108859	Pdk1,Hkdc1,Pdhb,Tfrc,Slc2a1,Pdha1,Camk2g,Eif4e2	0.0032	0.0205
KEGG	10090	Kid. Medulla	Downregulated	mmu00970	Aminoacyl-tRNA biosynthesis	5	44	10090.ENSMUSP00000010899,10090.ENSMUSP00000033159,10090.ENSMUSP00000044937,10090.ENSMUSP00000046453,10090.ENSMUSP00000102393	Cars,Ears2,Nars2,Cars2,Pars2	0.0034	0.0211
KEGG	10090	Kid. Medulla	Downregulated	mmu00010	Glycolysis / Gluconeogenesis	6	65	10090.ENSMUSP00000020277,10090.ENSMUSP00000020768,10090.ENSMUSP00000022268,10090.ENSMUSP00000028944,10090.ENSMUSP00000033662,10090.ENSMUSP00000040580	Hkdc1,Pgam2,Pdhb,Acss1,Pdha1,Galm	0.0035	0.0216
KEGG	10090	Kid. Medulla	Downregulated	mmu04973	Carbohydrate digestion and absorption	5	45	10090.ENSMUSP00000020277,10090.ENSMUSP00000027863,10090.ENSMUSP00000030826,10090.ENSMUSP00000071466,10090.ENSMUSP00000079691	Hkdc1,Atp1b1,Slc2a5,Mgam,Atp1a3	0.0037	0.0222
KEGG	10090	Kid. Medulla	Downregulated	mmu04925	Aldosterone synthesis and secretion	7	94	10090.ENSMUSP00000002765,10090.ENSMUSP00000003207,10090.ENSMUSP00000027863,10090.ENSMUSP00000071720,10090.ENSMUSP00000079691,10090.ENSMUSP00000110563,10090.ENSMUSP00000113498	Prkd1,Lipe,Atp1b1,Camk2g,Atp1a3,Adcy5,Adcy9	0.0051	0.03
KEGG	10090	Kid. Medulla	Downregulated	mmu00480	Glutathione metabolism	6	71	10090.ENSMUSP00000006508,10090.ENSMUSP00000031897,10090.ENSMUSP00000103007,10090.ENSMUSP00000120154,10090.ENSMUSP00000125604,10090.ENSMUSP00000128661	Ggt1,Gstk1,Idh2,Ggct,Gstt4,Odc1	0.0053	0.0306
KEGG	10090	Kid. Medulla	Downregulated	mmu00380	Tryptophan metabolism	5	51	10090.ENSMUSP00000023559,10090.ENSMUSP00000026538,10090.ENSMUSP00000038914,10090.ENSMUSP00000048482,10090.ENSMUSP00000120976	Ehhadh,Echs1,Kmo,Acmsd,Hadha	0.006	0.0343
KEGG	10090	Kid. Medulla	Downregulated	mmu00785	Lipoic acid metabolism	2	4	10090.ENSMUSP00000036140,10090.ENSMUSP00000038739	Acsm1,Lipt1	0.0061	0.0343
KEGG	10090	Kid. Medulla	Downregulated	mmu04610	Complement and coagulation cascades	13	91	10090.ENSMUSP00000014578,10090.ENSMUSP00000021948,10090.ENSMUSP00000023589,10090.ENSMUSP00000024988,10090.ENSMUSP00000026907,10090.ENSMUSP00000029771,10090.ENSMUSP00000048704,10090.ENSMUSP00000068971,10090.ENSMUSP00000069418,10090.ENSMUSP00000072652,10090.ENSMUSP00000077909,10090.ENSMUSP00000113606,10090.ENSMUSP00000139941	Plg,F12,Kng1,C3,Klkb1,F3,Serpinf2,Serpinc1,C4b,Serpina1a,Serpina1d,Serpina1e,Serpina1b	3.74e-14	1.24e-11
KEGG	10090	Pancreas	Upregulated	mmu00480	Glutathione metabolism	9	71	10090.ENSMUSP00000004136,10090.ENSMUSP00000004137,10090.ENSMUSP00000012348,10090.ENSMUSP00000026050,10090.ENSMUSP00000034905,10090.ENSMUSP00000078630,10090.ENSMUSP00000098942,10090.ENSMUSP00000129565,10090.ENSMUSP00000151239	Gstm3,Gstm7,Gstm2,Gsto1,Gclc,Gss,Chac2,Gstp1,Gstt2	2.84e-07	4.67e-05
KEGG	10090	Pancreas	Upregulated	mmu00983	Drug metabolism - other enzymes	10	90	10090.ENSMUSP00000004136,10090.ENSMUSP00000004137,10090.ENSMUSP00000012348,10090.ENSMUSP00000021217,10090.ENSMUSP00000023510,10090.ENSMUSP00000026050,10090.ENSMUSP00000035053,10090.ENSMUSP00000072803,10090.ENSMUSP00000129565,10090.ENSMUSP00000151239	Gstm3,Gstm7,Gstm2,Nme2,Umps,Gsto1,Nme6,Ugt1a1,Gstp1,Gstt2	1.9e-07	4.67e-05
KEGG	10090	Pancreas	Upregulated	mmu01100	Metabolic pathways	42	1534	10090.ENSMUSP00000002846,10090.ENSMUSP00000004136,10090.ENSMUSP00000004137,10090.ENSMUSP00000012348,10090.ENSMUSP00000017534,10090.ENSMUSP00000020298,10090.ENSMUSP00000021217,10090.ENSMUSP00000021550,10090.ENSMUSP00000022207,10090.ENSMUSP00000023112,10090.ENSMUSP00000023237,10090.ENSMUSP00000023396,10090.ENSMUSP00000023510,10090.ENSMUSP00000024031,10090.ENSMUSP00000025542,10090.ENSMUSP00000026050…	Gnmt,Gstm3,Gstm7,Gstm2,Aldoc,Pcbd1,Nme2,Arg2,Elovl7,Pmm1,Naprt,Pmm2,Umps,Acy1,Psat1,Gsto1,Fpgs,B4galt1,Nt5c3,Acsbg1,Gclc,Nme6,Gcsh,Csgalnact2,Mif,Pik3cg,Art2b,Cept1,Amy1,Ugt1a1,Afmid,Gss,B3galnt2,Alg1,Chac2,Sord,Bdh2,Gapdh,Mgat4a,Gstp1,Phykpl,Gstt2	1.41e-07	4.67e-05
KEGG	10090	Pancreas	Upregulated	mmu00980	Metabolism of xenobiotics by cytochrome P450	7	72	10090.ENSMUSP00000004136,10090.ENSMUSP00000004137,10090.ENSMUSP00000012348,10090.ENSMUSP00000026050,10090.ENSMUSP00000072803,10090.ENSMUSP00000129565,10090.ENSMUSP00000151239	Gstm3,Gstm7,Gstm2,Gsto1,Ugt1a1,Gstp1,Gstt2	3.01e-05	0.0021
KEGG	10090	Pancreas	Upregulated	mmu00982	Drug metabolism - cytochrome P450	7	70	10090.ENSMUSP00000004136,10090.ENSMUSP00000004137,10090.ENSMUSP00000012348,10090.ENSMUSP00000026050,10090.ENSMUSP00000072803,10090.ENSMUSP00000129565,10090.ENSMUSP00000151239	Gstm3,Gstm7,Gstm2,Gsto1,Ugt1a1,Gstp1,Gstt2	2.55e-05	0.0021
KEGG	10090	Pancreas	Upregulated	mmu00970	Aminoacyl-tRNA biosynthesis	5	44	10090.ENSMUSP00000018992,10090.ENSMUSP00000027602,10090.ENSMUSP00000034441,10090.ENSMUSP00000084572,10090.ENSMUSP00000124625	Rars,Dars,Aars,Vars,Wars	0.00022	0.0108
KEGG	10090	Pancreas	Upregulated	mmu05204	Chemical carcinogenesis	7	99	10090.ENSMUSP00000004136,10090.ENSMUSP00000004137,10090.ENSMUSP00000012348,10090.ENSMUSP00000026050,10090.ENSMUSP00000072803,10090.ENSMUSP00000129565,10090.ENSMUSP00000151239	Gstm3,Gstm7,Gstm2,Gsto1,Ugt1a1,Gstp1,Gstt2	0.0002	0.0108
KEGG	10090	Pancreas	Upregulated	mmu01524	Platinum drug resistance	6	79	10090.ENSMUSP00000004136,10090.ENSMUSP00000004137,10090.ENSMUSP00000012348,10090.ENSMUSP00000026050,10090.ENSMUSP00000129565,10090.ENSMUSP00000151239	Gstm3,Gstm7,Gstm2,Gsto1,Gstp1,Gstt2	0.00039	0.0163
KEGG	10090	Pancreas	Upregulated	mmu03010	Ribosome	7	126	10090.ENSMUSP00000029722,10090.ENSMUSP00000038352,10090.ENSMUSP00000079340,10090.ENSMUSP00000086614,10090.ENSMUSP00000106014,10090.ENSMUSP00000110728,10090.ENSMUSP00000131489	Rps3a1,Rps29,Rpl36,Rpl34,Rpl30,Rpl35a,Rpl14	0.00077	0.0286
KEGG	10090	Pancreas	Upregulated	mmu00051	Fructose and mannose metabolism	4	35	10090.ENSMUSP00000017534,10090.ENSMUSP00000023112,10090.ENSMUSP00000023396,10090.ENSMUSP00000106180	Aldoc,Pmm1,Pmm2,Sord	0.00094	0.0299
KEGG	10090	Pancreas	Upregulated	mmu04141	Protein processing in endoplasmic reticulum	8	169	10090.ENSMUSP00000020962,10090.ENSMUSP00000021864,10090.ENSMUSP00000030134,10090.ENSMUSP00000045456,10090.ENSMUSP00000054852,10090.ENSMUSP00000072929,10090.ENSMUSP00000092157,10090.ENSMUSP00000137440	Ubxn2a,Ssr1,Rad23b,Ssr2,Xbp1,Erlec1,Sec31a,Canx	0.0009	0.0299
KEGG	10090	Pancreas	Upregulated	mmu05418	Fluid shear stress and atherosclerosis	7	142	10090.ENSMUSP00000004136,10090.ENSMUSP00000004137,10090.ENSMUSP00000012348,10090.ENSMUSP00000017881,10090.ENSMUSP00000026050,10090.ENSMUSP00000129565,10090.ENSMUSP00000151239	Gstm3,Gstm7,Gstm2,Mmp9,Gsto1,Gstp1,Gstt2	0.0015	0.0416
KEGG	10090	Pancreas	Downregulated	mmu05412	Arrhythmogenic right ventricular cardiomyopathy	15	76	10090.ENSMUSP00000002029,10090.ENSMUSP00000021142,10090.ENSMUSP00000027409,10090.ENSMUSP00000043957,10090.ENSMUSP00000067708,10090.ENSMUSP00000076459,10090.ENSMUSP00000077132,10090.ENSMUSP00000084055,10090.ENSMUSP00000090304,10090.ENSMUSP00000096712,10090.ENSMUSP00000098066,10090.ENSMUSP00000127604,10090.ENSMUSP00000132512,10090.ENSMUSP00000132809,10090.ENSMUSP00000155514	Emd,Atp2a3,Des,Lama1,Actn2,Sgcd,Itga1,Tcf7,Lama2,Itga7,Actb,Itgb4,Cacna2d2,Slc8a1,Cacnb3	1.69e-08	5.61e-06
KEGG	10090	Pancreas	Downregulated	mmu05410	Hypertrophic cardiomyopathy	15	88	10090.ENSMUSP00000002029,10090.ENSMUSP00000021142,10090.ENSMUSP00000027409,10090.ENSMUSP00000036410,10090.ENSMUSP00000043957,10090.ENSMUSP00000076459,10090.ENSMUSP00000077132,10090.ENSMUSP00000090304,10090.ENSMUSP00000096712,10090.ENSMUSP00000098066,10090.ENSMUSP00000109337,10090.ENSMUSP00000127604,10090.ENSMUSP00000132512,10090.ENSMUSP00000132809,10090.ENSMUSP00000155514	Emd,Atp2a3,Des,Prkab2,Lama1,Sgcd,Itga1,Lama2,Itga7,Actb,Tpm1,Itgb4,Cacna2d2,Slc8a1,Cacnb3	9.38e-08	1.56e-05
KEGG	10090	Pancreas	Downregulated	mmu05414	Dilated cardiomyopathy	15	90	10090.ENSMUSP00000002029,10090.ENSMUSP00000005606,10090.ENSMUSP00000021142,10090.ENSMUSP00000027409,10090.ENSMUSP00000043957,10090.ENSMUSP00000076459,10090.ENSMUSP00000077132,10090.ENSMUSP00000090304,10090.ENSMUSP00000096712,10090.ENSMUSP00000098066,10090.ENSMUSP00000109337,10090.ENSMUSP00000127604,10090.ENSMUSP00000132512,10090.ENSMUSP00000132809,10090.ENSMUSP00000155514	Emd,Prkaca,Atp2a3,Des,Lama1,Sgcd,Itga1,Lama2,Itga7,Actb,Tpm1,Itgb4,Cacna2d2,Slc8a1,Cacnb3	1.22e-07	1.56e-05
KEGG	10090	Pancreas	Downregulated	mmu04371	Apelin signaling pathway	17	133	10090.ENSMUSP00000003207,10090.ENSMUSP00000005606,10090.ENSMUSP00000028735,10090.ENSMUSP00000032264,10090.ENSMUSP00000032909,10090.ENSMUSP00000035045,10090.ENSMUSP00000036410,10090.ENSMUSP00000038150,10090.ENSMUSP00000046539,10090.ENSMUSP00000048218,10090.ENSMUSP00000094874,10090.ENSMUSP00000099583,10090.ENSMUSP00000110860,10090.ENSMUSP00000120421,10090.ENSMUSP00000130115,10090.ENSMUSP00000132809…	Lipe,Prkaca,Jag1,Gabarapl1,Pde3b,Mras,Prkab2,Itpr3,Camk4,Acta2,Prkce,Plcb2,Nrf1,Nos1,Smad2,Slc8a1,Plin1	5.46e-07	4.53e-05
KEGG	10090	Pancreas	Downregulated	mmu03320	PPAR signaling pathway	13	86	10090.ENSMUSP00000000466,10090.ENSMUSP00000010795,10090.ENSMUSP00000027356,10090.ENSMUSP00000030136,10090.ENSMUSP00000032856,10090.ENSMUSP00000034046,10090.ENSMUSP00000034267,10090.ENSMUSP00000034989,10090.ENSMUSP00000036936,10090.ENSMUSP00000042351,10090.ENSMUSP00000104533,10090.ENSMUSP00000139859,10090.ENSMUSP00000146028	Plin2,Acaa1b,Cyp27a1,Aqp7,Me3,Acsl1,Slc27a1,Me1,Scd1,Acaa1a,Acsl6,Plin4,Plin1	2.24e-06	0.00015
KEGG	10090	Pancreas	Downregulated	mmu01100	Metabolic pathways	71	1534	10090.ENSMUSP00000001027,10090.ENSMUSP00000001507,10090.ENSMUSP00000002625,10090.ENSMUSP00000010049,10090.ENSMUSP00000010795,10090.ENSMUSP00000013737,10090.ENSMUSP00000014698,10090.ENSMUSP00000018113,10090.ENSMUSP00000018990,10090.ENSMUSP00000019231,10090.ENSMUSP00000020034,10090.ENSMUSP00000020851,10090.ENSMUSP00000022529,10090.ENSMUSP00000023132,10090.ENSMUSP00000024757,10090.ENSMUSP00000025385…	Aox1,Cyp51,Uck1,Kdsr,Acaa1b,Ndufs2,Dguok,Ptgis,Pank3,Atp6ap1,Echdc1,Cox11,Tkt,Pde1b,Enpp4,Hsd17b4,Cps1,Cyp27a1,Agpat2,Ext2,Car2,Acss2,Ugcg,Nudt2,Aacs,Me3,Pde3b,Acsl1,Gpt2,Aldh1a2,Nnmt,Elovl5,Me1,Scd1,Akr1b8,Cyp2s1,Acaa1a,Setd7,Pank1,Setd1a,Agpat1,Tigar,Fasn,Ptgs1,Ndufa8,Ephx2,Lpin1,Pla2g4a,Pygl,Mthfd2l,mt-Nd2,mt-Nd4,mt-Nd5,Gpx1,Gpx3,Pnp2,Aoc3,Mtmr4,Acaca,Plcb2,Pip5k1a,Acly,Acsl6,Synj1,Aldh3b2,Ehm…	1.68e-05	0.00093
KEGG	10090	Pancreas	Downregulated	mmu04510	Focal adhesion	18	196	10090.ENSMUSP00000000058,10090.ENSMUSP00000013886,10090.ENSMUSP00000021554,10090.ENSMUSP00000042364,10090.ENSMUSP00000043957,10090.ENSMUSP00000066238,10090.ENSMUSP00000074922,10090.ENSMUSP00000077132,10090.ENSMUSP00000090304,10090.ENSMUSP00000096712,10090.ENSMUSP00000098066,10090.ENSMUSP00000098765,10090.ENSMUSP00000102852,10090.ENSMUSP00000109938,10090.ENSMUSP00000111103,10090.ENSMUSP00000127173…	Cav2,Ppp1r12c,Actn1,Myl12b,Lama1,Rap1b,Cav3,Itga1,Lama2,Itga7,Actb,Col4a6,Pip5k1a,Flna,Met,Pdgfra,Itgb4,Ppp1r12b	1.83e-05	0.00093
KEGG	10090	Pancreas	Downregulated	mmu01212	Fatty acid metabolism	9	61	10090.ENSMUSP00000010795,10090.ENSMUSP00000025385,10090.ENSMUSP00000034046,10090.ENSMUSP00000034904,10090.ENSMUSP00000036936,10090.ENSMUSP00000042351,10090.ENSMUSP00000052872,10090.ENSMUSP00000099490,10090.ENSMUSP00000104533	Acaa1b,Hsd17b4,Acsl1,Elovl5,Scd1,Acaa1a,Fasn,Acaca,Acsl6	9.65e-05	0.004
KEGG	10090	Pancreas	Downregulated	mmu04810	Regulation of actin cytoskeleton	17	211	10090.ENSMUSP00000002640,10090.ENSMUSP00000013886,10090.ENSMUSP00000021554,10090.ENSMUSP00000022566,10090.ENSMUSP00000028239,10090.ENSMUSP00000031625,10090.ENSMUSP00000035045,10090.ENSMUSP00000042364,10090.ENSMUSP00000045710,10090.ENSMUSP00000077132,10090.ENSMUSP00000096712,10090.ENSMUSP00000098066,10090.ENSMUSP00000102852,10090.ENSMUSP00000124312,10090.ENSMUSP00000127173,10090.ENSMUSP00000127604…	Scin,Ppp1r12c,Actn1,Spata13,Gsn,Arpc1a,Mras,Myl12b,Fgf1,Itga1,Itga7,Actb,Pip5k1a,Ssh1,Pdgfra,Itgb4,Ppp1r12b	0.00014	0.0051
KEGG	10090	Pancreas	Downregulated	mmu04146	Peroxisome	10	85	10090.ENSMUSP00000000896,10090.ENSMUSP00000010795,10090.ENSMUSP00000025385,10090.ENSMUSP00000031472,10090.ENSMUSP00000034046,10090.ENSMUSP00000042351,10090.ENSMUSP00000069209,10090.ENSMUSP00000099506,10090.ENSMUSP00000104533,10090.ENSMUSP00000104737	Pxmp4,Acaa1b,Hsd17b4,Pxmp2,Acsl1,Acaa1a,Ephx2,Pex14,Acsl6,Nudt7	0.00022	0.0073
KEGG	10090	Pancreas	Downregulated	mmu04144	Endocytosis	18	250	10090.ENSMUSP00000000058,10090.ENSMUSP00000014694,10090.ENSMUSP00000015877,10090.ENSMUSP00000020248,10090.ENSMUSP00000025684,10090.ENSMUSP00000031625,10090.ENSMUSP00000034131,10090.ENSMUSP00000035662,10090.ENSMUSP00000041899,10090.ENSMUSP00000074922,10090.ENSMUSP00000090130,10090.ENSMUSP00000096293,10090.ENSMUSP00000102852,10090.ENSMUSP00000127173,10090.ENSMUSP00000129163,10090.ENSMUSP00000130115…	Cav2,Rbsn,Capza2,Washc3,Ehd1,Arpc1a,Vps35,Arap3,Asap3,Cav3,Vps26a,Psd3,Pip5k1a,Pdgfra,Rab11a,Smad2,Zfyve27,Chmp1b	0.00033	0.0098
KEGG	10090	Pancreas	Downregulated	mmu04020	Calcium signaling pathway	15	191	10090.ENSMUSP00000005606,10090.ENSMUSP00000021142,10090.ENSMUSP00000023132,10090.ENSMUSP00000033289,10090.ENSMUSP00000034049,10090.ENSMUSP00000038150,10090.ENSMUSP00000042188,10090.ENSMUSP00000046539,10090.ENSMUSP00000099384,10090.ENSMUSP00000099583,10090.ENSMUSP00000113533,10090.ENSMUSP00000119242,10090.ENSMUSP00000120421,10090.ENSMUSP00000127173,10090.ENSMUSP00000132809	Prkaca,Atp2a3,Pde1b,Stim1,Slc25a4,Itpr3,Tpcn1,Camk4,Tnnc2,Plcb2,Phkg2,Atp2b4,Nos1,Pdgfra,Slc8a1	0.00043	0.012
KEGG	10090	Pancreas	Downregulated	mmu04921	Oxytocin signaling pathway	12	145	10090.ENSMUSP00000005606,10090.ENSMUSP00000013886,10090.ENSMUSP00000036410,10090.ENSMUSP00000038150,10090.ENSMUSP00000046539,10090.ENSMUSP00000070868,10090.ENSMUSP00000098066,10090.ENSMUSP00000099583,10090.ENSMUSP00000128803,10090.ENSMUSP00000131406,10090.ENSMUSP00000132512,10090.ENSMUSP00000155514	Prkaca,Ppp1r12c,Prkab2,Itpr3,Camk4,Pla2g4a,Actb,Plcb2,Myl6,Ppp1r12b,Cacna2d2,Cacnb3	0.001	0.0265
KEGG	10090	Pancreas	Downregulated	mmu04530	Tight junction	12	152	10090.ENSMUSP00000005606,10090.ENSMUSP00000006911,10090.ENSMUSP00000021554,10090.ENSMUSP00000023673,10090.ENSMUSP00000036410,10090.ENSMUSP00000042364,10090.ENSMUSP00000060749,10090.ENSMUSP00000093382,10090.ENSMUSP00000094874,10090.ENSMUSP00000098066,10090.ENSMUSP00000099652,10090.ENSMUSP00000128803	Prkaca,Cdk4,Actn1,Runx1,Prkab2,Myl12b,Llgl1,Bves,Prkce,Actb,Tjp1,Myl6	0.0015	0.0358
KEGG	10090	Pancreas	Downregulated	mmu04270	Vascular smooth muscle contraction	11	133	10090.ENSMUSP00000005606,10090.ENSMUSP00000013886,10090.ENSMUSP00000021527,10090.ENSMUSP00000035642,10090.ENSMUSP00000038150,10090.ENSMUSP00000048218,10090.ENSMUSP00000070868,10090.ENSMUSP00000094874,10090.ENSMUSP00000099583,10090.ENSMUSP00000128803,10090.ENSMUSP00000131406	Prkaca,Ppp1r12c,Prkch,Ppp1r14a,Itpr3,Acta2,Pla2g4a,Prkce,Plcb2,Myl6,Ppp1r12b	0.0017	0.0368
KEGG	10090	Plasma	Downregulated	mmu04610	Complement and coagulation cascades	7	91	10090.ENSMUSP00000025230,10090.ENSMUSP00000029771,10090.ENSMUSP00000068971,10090.ENSMUSP00000072652,10090.ENSMUSP00000077909,10090.ENSMUSP00000139941,10090.ENSMUSP00000153147	C2,F3,Serpinc1,Serpina1a,Serpina1d,Serpina1b,Mbl1	2.01e-08	6.69e-06
KEGG	10090	Plasma	Downregulated	mmu00480	Glutathione metabolism	4	71	10090.ENSMUSP00000001713,10090.ENSMUSP00000004453,10090.ENSMUSP00000033992,10090.ENSMUSP00000081011	Gstt1,Gpx6,Gsr,Gpx3	8.25e-05	0.0137
KEGG	10090	Plasma	Downregulated	mmu04918	Thyroid hormone synthesis	4	73	10090.ENSMUSP00000004453,10090.ENSMUSP00000033992,10090.ENSMUSP00000038150,10090.ENSMUSP00000081011	Gpx6,Gsr,Itpr3,Gpx3	9.14e-05	0.0137
KEGG	10090	Urine	Upregulated	mmu04610	Complement and coagulation cascades	8	91	10090.ENSMUSP00000014578,10090.ENSMUSP00000017488,10090.ENSMUSP00000022576,10090.ENSMUSP00000023450,10090.ENSMUSP00000023589,10090.ENSMUSP00000029771,10090.ENSMUSP00000068971,10090.ENSMUSP00000113606	Plg,Vtn,Cpb2,Serpind1,Kng1,F3,Serpinc1,Serpina1e	1.06e-06	0.00035
KEGG	10090	Urine	Upregulated	mmu04141	Protein processing in endoplasmic reticulum	8	169	10090.ENSMUSP00000002091,10090.ENSMUSP00000019722,10090.ENSMUSP00000021375,10090.ENSMUSP00000022378,10090.ENSMUSP00000030134,10090.ENSMUSP00000032143,10090.ENSMUSP00000068895,10090.ENSMUSP00000105383	Bcap31,Ubxn6,Sec23a,Ero1l,Rad23b,Rpn1,Capn2,Rad23a	7.53e-05	0.0125
KEGG	10090	Urine	Upregulated	mmu00030	Pentose phosphate pathway	4	33	10090.ENSMUSP00000004327,10090.ENSMUSP00000021907,10090.ENSMUSP00000026576,10090.ENSMUSP00000081141	G6pdx,Fbp2,Taldo1,Pgd	0.00019	0.021
KEGG	10090	Urine	Upregulated	mmu00480	Glutathione metabolism	5	71	10090.ENSMUSP00000004140,10090.ENSMUSP00000004327,10090.ENSMUSP00000033992,10090.ENSMUSP00000034903,10090.ENSMUSP00000081141	Gstm1,G6pdx,Gsr,Gsta4,Pgd	0.00032	0.021
KEGG	10090	Urine	Upregulated	mmu04216	Ferroptosis	4	40	10090.ENSMUSP00000035158,10090.ENSMUSP00000054863,10090.ENSMUSP00000103964,10090.ENSMUSP00000158539	Trf,Pcbp1,Cp,Fth1	0.00037	0.021
KEGG	10090	Urine	Upregulated	mmu04918	Thyroid hormone synthesis	5	73	10090.ENSMUSP00000031314,10090.ENSMUSP00000033626,10090.ENSMUSP00000033992,10090.ENSMUSP00000038150,10090.ENSMUSP00000074783	Alb,Serpina7,Gsr,Itpr3,Ttr	0.00036	0.021
KEGG	10090	Urine	Upregulated	mmu05143	African trypanosomiasis	4	35	10090.ENSMUSP00000005057,10090.ENSMUSP00000023589,10090.ENSMUSP00000023934,10090.ENSMUSP00000034588	Thop1,Kng1,Hbb-bs,Apoa1	0.00023	0.021
KEGG	10090	Urine	Upregulated	mmu00970	Aminoacyl-tRNA biosynthesis	4	44	10090.ENSMUSP00000001416,10090.ENSMUSP00000010899,10090.ENSMUSP00000095197,10090.ENSMUSP00000129828	Hars,Cars,Lars,Farsb	0.00052	0.0218
KEGG	10090	Urine	Upregulated	mmu03050	Proteasome	4	46	10090.ENSMUSP00000007212,10090.ENSMUSP00000022380,10090.ENSMUSP00000028083,10090.ENSMUSP00000030642	Psmd2,Psmc6,Psmb7,Psmb2	0.00061	0.0226
KEGG	10090	Urine	Upregulated	mmu00983	Drug metabolism - other enzymes	5	90	10090.ENSMUSP00000004140,10090.ENSMUSP00000030491,10090.ENSMUSP00000034173,10090.ENSMUSP00000034189,10090.ENSMUSP00000034903	Gstm1,Cmpk1,Ces1e,Ces1c,Gsta4	0.00088	0.0292
KEGG	10090	Urine	Downregulated	mmu04142	Lysosome	13	128	10090.ENSMUSP00000000608,10090.ENSMUSP00000003910,10090.ENSMUSP00000023088,10090.ENSMUSP00000030412,10090.ENSMUSP00000033824,10090.ENSMUSP00000042073,10090.ENSMUSP00000043167,10090.ENSMUSP00000073072,10090.ENSMUSP00000101866,10090.ENSMUSP00000127646,10090.ENSMUSP00000137476,10090.ENSMUSP00000150903,10090.ENSMUSP00000152169	Gm2a,Dnase2a,Naga,Ppt1,Lamp1,Gnptg,Gns,Ctse,Gaa,Arsa,Psap,Acp5,Ctsl	5.12e-08	1.7e-05
KEGG	10090	Urine	Downregulated	mmu04512	ECM-receptor interaction	11	86	10090.ENSMUSP00000002979,10090.ENSMUSP00000005218,10090.ENSMUSP00000017153,10090.ENSMUSP00000033899,10090.ENSMUSP00000044903,10090.ENSMUSP00000069087,10090.ENSMUSP00000084043,10090.ENSMUSP00000099853,10090.ENSMUSP00000103000,10090.ENSMUSP00000109084,10090.ENSMUSP00000145740	Lamb1,Cd44,Sdc4,Col4a2,Thbs1,Lamb2,Spp1,Cd47,Tnc,Col4a3,Gp6	6.58e-08	1.7e-05
KEGG	10090	Urine	Downregulated	mmu04514	Cell adhesion molecules	14	157	10090.ENSMUSP00000000312,10090.ENSMUSP00000002011,10090.ENSMUSP00000017153,10090.ENSMUSP00000023134,10090.ENSMUSP00000025166,10090.ENSMUSP00000034472,10090.ENSMUSP00000041907,10090.ENSMUSP00000063656,10090.ENSMUSP00000074898,10090.ENSMUSP00000099935,10090.ENSMUSP00000101032,10090.ENSMUSP00000102408,10090.ENSMUSP00000130668,10090.ENSMUSP00000131355	Cdh1,Esam,Sdc4,Glycam1,Cdh2,Jam3,F11r,Neo1,Nectin2,L1cam,Icosl,Pecam1,Ncam1,Glg1	7.05e-08	1.7e-05
KEGG	10090	Urine	Downregulated	mmu04974	Protein digestion and absorption	12	106	10090.ENSMUSP00000011607,10090.ENSMUSP00000024707,10090.ENSMUSP00000033899,10090.ENSMUSP00000035429,10090.ENSMUSP00000071662,10090.ENSMUSP00000075429,10090.ENSMUSP00000080866,10090.ENSMUSP00000083620,10090.ENSMUSP00000099981,10090.ENSMUSP00000101049,10090.ENSMUSP00000109084,10090.ENSMUSP00000142205	Cpb1,Mep1a,Col4a2,Fxyd2,Col12a1,Prcp,Mep1b,Col5a2,Col15a1,Col18a1,Col4a3,Mme	5.66e-08	1.7e-05
KEGG	10090	Urine	Downregulated	mmu04510	Focal adhesion	12	196	10090.ENSMUSP00000002979,10090.ENSMUSP00000029653,10090.ENSMUSP00000032561,10090.ENSMUSP00000032910,10090.ENSMUSP00000033899,10090.ENSMUSP00000044903,10090.ENSMUSP00000069087,10090.ENSMUSP00000084043,10090.ENSMUSP00000103000,10090.ENSMUSP00000107380,10090.ENSMUSP00000109084,10090.ENSMUSP00000111103	Lamb1,Egf,Vasp,Mylpf,Col4a2,Thbs1,Lamb2,Spp1,Tnc,Myl2,Col4a3,Met	2.29e-05	0.0015
KEGG	10090	Urine	Downregulated	mmu04610	Complement and coagulation cascades	8	91	10090.ENSMUSP00000022368,10090.ENSMUSP00000022616,10090.ENSMUSP00000029140,10090.ENSMUSP00000048667,10090.ENSMUSP00000056836,10090.ENSMUSP00000073695,10090.ENSMUSP00000083204,10090.ENSMUSP00000125531	Plau,Clu,Procr,F13a1,Cfd,Serpina1c,F5,C1s1	5.18e-05	0.0029
KEGG	10090	Urine	Downregulated	mmu04614	Renin-angiotensin system	5	36	10090.ENSMUSP00000001963,10090.ENSMUSP00000074659,10090.ENSMUSP00000075429,10090.ENSMUSP00000103015,10090.ENSMUSP00000142205	Ace,Klk1,Prcp,Anpep,Mme	0.0002	0.0095
KEGG	10090	Urine	Downregulated	mmu04918	Thyroid hormone synthesis	6	73	10090.ENSMUSP00000001253,10090.ENSMUSP00000004453,10090.ENSMUSP00000025541,10090.ENSMUSP00000035429,10090.ENSMUSP00000079752,10090.ENSMUSP00000090637	Slc26a4,Gpx6,Gnaq,Fxyd2,Lrp2,Asgr1	0.00063	0.0263
KEGG	10090	Urine	Downregulated	mmu04670	Leukocyte transendothelial migration	7	113	10090.ENSMUSP00000002011,10090.ENSMUSP00000032561,10090.ENSMUSP00000032910,10090.ENSMUSP00000034472,10090.ENSMUSP00000041907,10090.ENSMUSP00000102408,10090.ENSMUSP00000107380	Esam,Vasp,Mylpf,Jam3,F11r,Pecam1,Myl2	0.0011	0.0407
KEGG	10090	Urine	Downregulated	mmu04961	Endocrine and other factor-regulated calcium reabsorption	5	58	10090.ENSMUSP00000025541,10090.ENSMUSP00000029876,10090.ENSMUSP00000035429,10090.ENSMUSP00000074659,10090.ENSMUSP00000077899	Gnaq,Calb1,Fxyd2,Klk1,Kl	0.0015	0.049
KEGG	10090	WAT	Upregulated	mmu05412	Arrhythmogenic right ventricular cardiomyopathy	11	76	10090.ENSMUSP00000001592,10090.ENSMUSP00000007130,10090.ENSMUSP00000021142,10090.ENSMUSP00000054944,10090.ENSMUSP00000057096,10090.ENSMUSP00000067708,10090.ENSMUSP00000071486,10090.ENSMUSP00000074702,10090.ENSMUSP00000077106,10090.ENSMUSP00000127604,10090.ENSMUSP00000147497	Jup,Ctnnb1,Atp2a3,Itgb6,Dsg2,Actn2,Actg1,Dsc2,Sgcg,Itgb4,Slc8a2	1.49e-05	0.005
KEGG	10090	WAT	Downregulated	mmu01100	Metabolic pathways	70	1534	10090.ENSMUSP00000004327,10090.ENSMUSP00000004396,10090.ENSMUSP00000005548,10090.ENSMUSP00000006692,10090.ENSMUSP00000007449,10090.ENSMUSP00000014438,10090.ENSMUSP00000018990,10090.ENSMUSP00000019382,10090.ENSMUSP00000020522,10090.ENSMUSP00000020629,10090.ENSMUSP00000022176,10090.ENSMUSP00000022529,10090.ENSMUSP00000022977,10090.ENSMUSP00000023116,10090.ENSMUSP00000023608,10090.ENSMUSP00000026220…	G6pdx,Atp6v1f,Hmox1,Mvd,Akr1b7,Ndufa2,Pank3,Tecr,Pfkl,Gfpt2,Hmgcr,Tkt,Sqle,Aco2,Atp5j,Scd3,Scd2,Nat1,Hprt,Acss2,Pmvk,Mecr,Ugdh,Psph,Aacs,Sdsl,Ndufc2,Dgat2,Nsdhl,Galnt2,Scd1,Fig4,Itpk1,Atp5l,Ndufv3,Sc5d,Vkorc1l1,Elovl6,Dhcr7,Cox6b1,mt-Nd1,mt-Nd2,mt-Co1,mt-Nd4,mt-Nd5,Gpx3,Pgd,Ppcdc,Gpx4,Alg6,Alg10b,Atp6v0a1,Ltc4s,Akr1b3,Acly,Dpm3,Uap1,Mvk,Pigp,Rpe,Chpt1,Sgms1,Mocs2,Comt,Idi1,Prps1l1,Hmgcs1,Fdft1,Gp…	2.62e-17	8.69e-15
KEGG	10090	WAT	Downregulated	mmu00190	Oxidative phosphorylation	13	130	10090.ENSMUSP00000004396,10090.ENSMUSP00000014438,10090.ENSMUSP00000023608,10090.ENSMUSP00000032882,10090.ENSMUSP00000047960,10090.ENSMUSP00000049000,10090.ENSMUSP00000075150,10090.ENSMUSP00000080991,10090.ENSMUSP00000080992,10090.ENSMUSP00000080993,10090.ENSMUSP00000081000,10090.ENSMUSP00000081001,10090.ENSMUSP00000099399	Atp6v1f,Ndufa2,Atp5j,Ndufc2,Atp5l,Ndufv3,Cox6b1,mt-Nd1,mt-Nd2,mt-Co1,mt-Nd4,mt-Nd5,Atp6v0a1	1.54e-07	2.56e-05
KEGG	10090	WAT	Downregulated	mmu00900	Terpenoid backbone biosynthesis	6	23	10090.ENSMUSP00000006692,10090.ENSMUSP00000022176,10090.ENSMUSP00000029564,10090.ENSMUSP00000107858,10090.ENSMUSP00000132780,10090.ENSMUSP00000153064	Mvd,Hmgcr,Pmvk,Mvk,Idi1,Hmgcs1	3e-06	0.00033
KEGG	10090	WAT	Downregulated	mmu05014	Amyotrophic lateral sclerosis	18	362	10090.ENSMUSP00000014438,10090.ENSMUSP00000023608,10090.ENSMUSP00000032264,10090.ENSMUSP00000032882,10090.ENSMUSP00000034428,10090.ENSMUSP00000038150,10090.ENSMUSP00000039598,10090.ENSMUSP00000046412,10090.ENSMUSP00000049000,10090.ENSMUSP00000075150,10090.ENSMUSP00000080991,10090.ENSMUSP00000080992,10090.ENSMUSP00000080993,10090.ENSMUSP00000081000,10090.ENSMUSP00000081001,10090.ENSMUSP00000081011…	Ndufa2,Atp5j,Gabarapl1,Ndufc2,Gabarapl2,Itpr3,Fig4,Atg2a,Ndufv3,Cox6b1,mt-Nd1,mt-Nd2,mt-Co1,mt-Nd4,mt-Nd5,Gpx3,Map3k5,Ulk1	1.08e-05	0.0009
KEGG	10090	WAT	Downregulated	mmu00030	Pentose phosphate pathway	6	33	10090.ENSMUSP00000004327,10090.ENSMUSP00000020522,10090.ENSMUSP00000022529,10090.ENSMUSP00000081141,10090.ENSMUSP00000109628,10090.ENSMUSP00000133931	G6pdx,Pfkl,Tkt,Pgd,Rpe,Prps1l1	1.82e-05	0.0012
KEGG	10090	WAT	Downregulated	mmu00100	Steroid biosynthesis	5	20	10090.ENSMUSP00000022977,10090.ENSMUSP00000033715,10090.ENSMUSP00000057354,10090.ENSMUSP00000073541,10090.ENSMUSP00000153671	Sqle,Nsdhl,Sc5d,Dhcr7,Fdft1	2.48e-05	0.0012
KEGG	10090	WAT	Downregulated	mmu01200	Carbon metabolism	10	122	10090.ENSMUSP00000004327,10090.ENSMUSP00000020522,10090.ENSMUSP00000022529,10090.ENSMUSP00000023116,10090.ENSMUSP00000029135,10090.ENSMUSP00000031399,10090.ENSMUSP00000031594,10090.ENSMUSP00000081141,10090.ENSMUSP00000109628,10090.ENSMUSP00000133931	G6pdx,Pfkl,Tkt,Aco2,Acss2,Psph,Sdsl,Pgd,Rpe,Prps1l1	2.14e-05	0.0012
KEGG	10090	WAT	Downregulated	mmu04152	AMPK signaling pathway	10	124	10090.ENSMUSP00000020522,10090.ENSMUSP00000020846,10090.ENSMUSP00000022176,10090.ENSMUSP00000025695,10090.ENSMUSP00000026220,10090.ENSMUSP00000026221,10090.ENSMUSP00000033880,10090.ENSMUSP00000036936,10090.ENSMUSP00000067046,10090.ENSMUSP00000143536	Pfkl,Srebf1,Hmgcr,Ppp2r5b,Scd3,Scd2,Eif4ebp1,Scd1,Lep,Ulk1	2.44e-05	0.0012
KEGG	10090	WAT	Downregulated	mmu04714	Thermogenesis	13	225	10090.ENSMUSP00000014438,10090.ENSMUSP00000023608,10090.ENSMUSP00000032882,10090.ENSMUSP00000047960,10090.ENSMUSP00000049000,10090.ENSMUSP00000062046,10090.ENSMUSP00000075150,10090.ENSMUSP00000080991,10090.ENSMUSP00000080992,10090.ENSMUSP00000080993,10090.ENSMUSP00000081000,10090.ENSMUSP00000081001,10090.ENSMUSP00000093485	Ndufa2,Atp5j,Ndufc2,Atp5l,Ndufv3,Cox19,Cox6b1,mt-Nd1,mt-Nd2,mt-Co1,mt-Nd4,mt-Nd5,Map3k5	4.33e-05	0.0016
KEGG	10090	WAT	Downregulated	mmu04723	Retrograde endocannabinoid signaling	10	144	10090.ENSMUSP00000014438,10090.ENSMUSP00000032882,10090.ENSMUSP00000038150,10090.ENSMUSP00000043088,10090.ENSMUSP00000049000,10090.ENSMUSP00000080991,10090.ENSMUSP00000080992,10090.ENSMUSP00000081000,10090.ENSMUSP00000081001,10090.ENSMUSP00000149938	Ndufa2,Ndufc2,Itpr3,Daglb,Ndufv3,mt-Nd1,mt-Nd2,mt-Nd4,mt-Nd5,Gnb5	7.99e-05	0.0027
KEGG	10090	WAT	Downregulated	mmu05016	Huntington disease	14	297	10090.ENSMUSP00000014438,10090.ENSMUSP00000023608,10090.ENSMUSP00000032882,10090.ENSMUSP00000046412,10090.ENSMUSP00000049000,10090.ENSMUSP00000075150,10090.ENSMUSP00000080991,10090.ENSMUSP00000080992,10090.ENSMUSP00000080993,10090.ENSMUSP00000081000,10090.ENSMUSP00000081001,10090.ENSMUSP00000081011,10090.ENSMUSP00000093485,10090.ENSMUSP00000143536	Ndufa2,Atp5j,Ndufc2,Atg2a,Ndufv3,Cox6b1,mt-Nd1,mt-Nd2,mt-Co1,mt-Nd4,mt-Nd5,Gpx3,Map3k5,Ulk1	0.00018	0.0053
KEGG	10090	WAT	Downregulated	mmu01230	Biosynthesis of amino acids	7	77	10090.ENSMUSP00000020522,10090.ENSMUSP00000022529,10090.ENSMUSP00000023116,10090.ENSMUSP00000031399,10090.ENSMUSP00000031594,10090.ENSMUSP00000109628,10090.ENSMUSP00000133931	Pfkl,Tkt,Aco2,Psph,Sdsl,Rpe,Prps1l1	0.00021	0.0057
KEGG	10090	WAT	Downregulated	mmu01040	Biosynthesis of unsaturated fatty acids	5	34	10090.ENSMUSP00000019382,10090.ENSMUSP00000026220,10090.ENSMUSP00000026221,10090.ENSMUSP00000036936,10090.ENSMUSP00000071351	Tecr,Scd3,Scd2,Scd1,Elovl6	0.00023	0.0058
KEGG	10090	WAT	Downregulated	mmu05012	Parkinson disease	12	238	10090.ENSMUSP00000014438,10090.ENSMUSP00000023608,10090.ENSMUSP00000032882,10090.ENSMUSP00000038150,10090.ENSMUSP00000049000,10090.ENSMUSP00000075150,10090.ENSMUSP00000080991,10090.ENSMUSP00000080992,10090.ENSMUSP00000080993,10090.ENSMUSP00000081000,10090.ENSMUSP00000081001,10090.ENSMUSP00000093485	Ndufa2,Atp5j,Ndufc2,Itpr3,Ndufv3,Cox6b1,mt-Nd1,mt-Nd2,mt-Co1,mt-Nd4,mt-Nd5,Map3k5	0.00028	0.0067
KEGG	10090	WAT	Downregulated	mmu05010	Alzheimer disease	15	360	10090.ENSMUSP00000014438,10090.ENSMUSP00000014743,10090.ENSMUSP00000023608,10090.ENSMUSP00000032882,10090.ENSMUSP00000038150,10090.ENSMUSP00000046412,10090.ENSMUSP00000049000,10090.ENSMUSP00000075150,10090.ENSMUSP00000080991,10090.ENSMUSP00000080992,10090.ENSMUSP00000080993,10090.ENSMUSP00000081000,10090.ENSMUSP00000081001,10090.ENSMUSP00000093485,10090.ENSMUSP00000143536	Ndufa2,Csf1,Atp5j,Ndufc2,Itpr3,Atg2a,Ndufv3,Cox6b1,mt-Nd1,mt-Nd2,mt-Co1,mt-Nd4,mt-Nd5,Map3k5,Ulk1	0.00037	0.0082
KEGG	10090	WAT	Downregulated	mmu01212	Fatty acid metabolism	6	61	10090.ENSMUSP00000019382,10090.ENSMUSP00000026220,10090.ENSMUSP00000026221,10090.ENSMUSP00000030742,10090.ENSMUSP00000036936,10090.ENSMUSP00000071351	Tecr,Scd3,Scd2,Mecr,Scd1,Elovl6	0.0004	0.0083
KEGG	10090	WAT	Downregulated	mmu04136	Autophagy - other	4	32	10090.ENSMUSP00000032264,10090.ENSMUSP00000034428,10090.ENSMUSP00000046412,10090.ENSMUSP00000139641	Gabarapl1,Gabarapl2,Atg2a,Atg9a	0.0017	0.0333
KEGG	10090	WAT	Downregulated	mmu04932	Non-alcoholic fatty liver disease	8	147	10090.ENSMUSP00000014438,10090.ENSMUSP00000020846,10090.ENSMUSP00000032882,10090.ENSMUSP00000049000,10090.ENSMUSP00000067046,10090.ENSMUSP00000075150,10090.ENSMUSP00000080993,10090.ENSMUSP00000093485	Ndufa2,Srebf1,Ndufc2,Ndufv3,Lep,Cox6b1,mt-Co1,Map3k5	0.0018	0.0338
KEGG	10090	WAT	Downregulated	mmu00040	Pentose and glucuronate interconversions	4	34	10090.ENSMUSP00000007449,10090.ENSMUSP00000031103,10090.ENSMUSP00000100045,10090.ENSMUSP00000109628	Akr1b7,Ugdh,Akr1b3,Rpe	0.0021	0.0366
KEGG	10090	WAT	Downregulated	mmu05020	Prion disease	11	263	10090.ENSMUSP00000014438,10090.ENSMUSP00000023608,10090.ENSMUSP00000032882,10090.ENSMUSP00000038150,10090.ENSMUSP00000049000,10090.ENSMUSP00000075150,10090.ENSMUSP00000080991,10090.ENSMUSP00000080992,10090.ENSMUSP00000080993,10090.ENSMUSP00000081000,10090.ENSMUSP00000081001	Ndufa2,Atp5j,Ndufc2,Itpr3,Ndufv3,Cox6b1,mt-Nd1,mt-Nd2,mt-Co1,mt-Nd4,mt-Nd5	0.0021	0.0366
KEGG	10090	WAT	Downregulated	mmu00561	Glycerolipid metabolism	5	61	10090.ENSMUSP00000007449,10090.ENSMUSP00000033001,10090.ENSMUSP00000064041,10090.ENSMUSP00000100045,10090.ENSMUSP00000157722	Akr1b7,Dgat2,Mogat2,Akr1b3,Gpam	0.0026	0.0408
KEGG	10090	WAT	Downregulated	mmu04610	Complement and coagulation cascades	6	91	10090.ENSMUSP00000029771,10090.ENSMUSP00000048667,10090.ENSMUSP00000072652,10090.ENSMUSP00000077909,10090.ENSMUSP00000132774,10090.ENSMUSP00000139941	F3,F13a1,Serpina1a,Serpina1d,Cd59a,Serpina1b	0.0028	0.0417
KEGG	10090	WAT	Downregulated	mmu04137	Mitophagy - animal	5	65	10090.ENSMUSP00000009256,10090.ENSMUSP00000032264,10090.ENSMUSP00000034428,10090.ENSMUSP00000139641,10090.ENSMUSP00000143536	Bcl2l13,Gabarapl1,Gabarapl2,Atg9a,Ulk1	0.0033	0.0481
