# Supplementary material for: Diversion of Arginine’s dietary metabolic fate in proteinuric kidney disease
Source: Research Square preprint supplement (doi:10.21203/rs.3.rs-9927381/v1), 2026-06-17
Supplement: Supplementary file 2 [file 05315086cb9d8c43ba14c85d.xlsx]

## Sheet: Sheet1
Tissue	Spearman_r_Arg10_Pro6_vs_log2FC	Spearman_r_Arg7_Pro6_vs_log2FC
Brain	0.0607698	0.00285979
Colon	0.0575259	-0.112225
Kid. Cortex	-0.0347407	0.0866241
Duodenum	0.0526576	0.0842283
Heart	-0.00720912	0.126985
Ileum	0.0592016	-0.00872496
Jejunum	0.0381493	0.10396
Liver	-0.0169655	-0.0556701
Lung	0.00600389	0.0118968
Kid. Medulla	-0.00402476	-0.0244439
Muscle	-0.0356318	0.0823832
Plasma	-0.10956	-0.320002
Spleen	0.00999347	0.0549466
Urine	0.0896197	-0.058154
