# Supplementary material for: Diversion of Arginine’s dietary metabolic fate in proteinuric kidney disease
Source: Research Square preprint supplement (doi:10.21203/rs.3.rs-9927381/v1), 2026-06-17
Supplement: Supplementary file 3 [file 05ba1305354acd038a5f113f.xlsx]

## Sheet: Alb_all_organs
Organ	Sample	R.Condition	PG.Genes	PG.ProteinNames	PG.UniProtIds	PG.NrOfStrippedSequencesUsedForQuantification	PG.Coverage	PG.Pvalue	PG.Qvalue	PG.Log2Quantity	PG.IBAQ	PG.MS1Quantity	PG.MS2Quantity	PG.Quantity	PG.MS2Channel1	PG.MS2Channel2	PG.MS2Channel3
Brain	Control_AD_1	Control_AD	Alb	ALBU_MOUSE	P07724	23	43.8%	1.16364e-10	0	21.5302	381786.6	17614204	3028580	3028580	979017	216775	53487.1
Brain	Control_AD_2	Control_AD	Alb	ALBU_MOUSE	P07724	21	39.3%	1.16364e-10	0	20.8976	286064.1	11896485	1953407	1953407	660629	133646	35129.8
Brain	Control_AD_3	Control_AD	Alb	ALBU_MOUSE	P07724	24	41.9%	1.16364e-10	0	21.5549	396102.9	17616664	3080773	3080773	946126	240469	53294.2
Brain	Control_AD_4	Control_AD	Alb	ALBU_MOUSE	P07724	24	43.3%	1.16364e-10	0	21.9252	494327.5	23722894	3.98229e+06	3.98229e+06	1303251	292548	82038.4
Brain	Control_AD_5	Control_AD	Alb	ALBU_MOUSE	P07724	25	43.1%	1.16364e-10	0	22.1829	568327.1	28214800	4.76117e+06	4.76117e+06	1.42905e+06	345044	99578.9
Brain	Control_AD_6	Control_AD	Alb	ALBU_MOUSE	P07724	24	43.3%	1.16364e-10	0	21.6449	396700.9	19536702	3.27907e+06	3.27907e+06	852727	207613	71031.3
Brain	Control_CD_1	Control_CD	Alb	ALBU_MOUSE	P07724	25	44.7%	1.16364e-10	0	23.0676	892351.1	56621088	8791293	8791293	3.11606e+06	1	1
Brain	Control_CD_2	Control_CD	Alb	ALBU_MOUSE	P07724	25	42.1%	1.16364e-10	0	22.6939	665563.2	40494308	6.78515e+06	6.78515e+06	2.56678e+06	2108.69	260.324
Brain	Control_CD_3	Control_CD	Alb	ALBU_MOUSE	P07724	28	47%	1.16364e-10	0	23.826	1685954.2	95529976	14870852	14870852	5.13475e+06	1025.7	1
Brain	Control_CD_4	Control_CD	Alb	ALBU_MOUSE	P07724	30	49.8%	1.16364e-10	0	23.3714	1099793.6	72040776	10851733	10851733	4058984	1	26.5146
Brain	Control_CD_5	Control_CD	Alb	ALBU_MOUSE	P07724	25	43.3%	1.16364e-10	0	22.0478	421254.4	29628170	4.3357e+06	4.3357e+06	1.62529e+06	1259.41	1
Brain	Control_CD_6	Control_CD	Alb	ALBU_MOUSE	P07724	28	44.7%	1.16364e-10	0	22.7917	746090.4	48179152	7.26102e+06	7.26102e+06	2.58592e+06	1652.03	24.2915
Brain	Proteinuric_AD_1	Proteinuric_AD	Alb	ALBU_MOUSE	P07724	25	45.1%	1.16364e-10	0	23.4781	1718797.4	75504664	11684746	11684746	3.73219e+06	919327	259234
Brain	Proteinuric_AD_2	Proteinuric_AD	Alb	ALBU_MOUSE	P07724	22	40.6%	1.16364e-10	0	20.3745	165946.7	8953849	1.35933e+06	1.35933e+06	456744	83133	11264.4
Brain	Proteinuric_AD_3	Proteinuric_AD	Alb	ALBU_MOUSE	P07724	23	40.6%	1.16364e-10	0	21.6398	502276.7	17521796	3267497	3267497	939622	308090	83522.8
Brain	Proteinuric_AD_4	Proteinuric_AD	Alb	ALBU_MOUSE	P07724	23	41.8%	1.16364e-10	0	21.7407	495394.4	20792490	3504278	3504278	1102565	252680	73763.6
Brain	Proteinuric_AD_5	Proteinuric_AD	Alb	ALBU_MOUSE	P07724	24	42.3%	1.16364e-10	0	21.0835	294955.9	13599509	2222045	2222045	563491	134398	68251.4
Brain	Proteinuric_CD_1	Proteinuric_CD	Alb	ALBU_MOUSE	P07724	24	43.8%	1.16364e-10	0	23.0225	976178.2	55556764	8520300	8520300	3.42344e+06	506.375	1
Brain	Proteinuric_CD_2	Proteinuric_CD	Alb	ALBU_MOUSE	P07724	23	41.8%	1.16364e-10	0	22.1855	551182.9	27758614	4.76972e+06	4.76972e+06	2088899	312.047	1
Brain	Proteinuric_CD_3	Proteinuric_CD	Alb	ALBU_MOUSE	P07724	25	42.6%	1.16364e-10	0	21.5569	284886.2	17965298	3085091	3085091	1129876	793.678	209.416
Brain	Proteinuric_CD_4	Proteinuric_CD	Alb	ALBU_MOUSE	P07724	23	41.6%	1.16364e-10	0	21.6152	278293.6	19541412	3212434	3212434	1.09299e+06	2458.86	32.4013
Colon	Control_AD_1	Control_AD	Alb	ALBU_MOUSE	P07724	27	48.5%	1.3632e-14	0	23.7485	1572619.7	52708496	14092764	14092764	4588579	1.22177e+06	3889.98
Colon	Control_AD_2	Control_AD	Alb	ALBU_MOUSE	P07724	29	49.5%	1.3632e-14	0	24.6454	3287287.4	94852848	26242348	26242348	8649788	2.91465e+06	9421.46
Colon	Control_AD_3	Control_AD	Alb	ALBU_MOUSE	P07724	28	47.9%	1.3632e-14	0	24.9167	3619000.8	123436232	31672714	31672714	10081973	3568996	8774.74
Colon	Control_AD_4	Control_AD	Alb	ALBU_MOUSE	P07724	29	51.5%	1.3632e-14	0	25.1243	3808573.9	143754592	36572484	36572484	9985692	3.29195e+06	9784.48
Colon	Control_AD_5	Control_AD	Alb	ALBU_MOUSE	P07724	31	53.9%	1.3632e-14	0	24.9368	3742499.9	128945992	32116906	32116906	9778584	2.8259e+06	8889.81
Colon	Control_AD_6	Control_AD	Alb	ALBU_MOUSE	P07724	30	51.6%	1.3632e-14	0	24.4845	2744609.8	102746144	23473052	23473052	7206559	2460753	8028.09
Colon	Control_CD_1	Control_CD	Alb	ALBU_MOUSE	P07724	36	54.6%	1.3632e-14	0	25.7844	5805850.7	269332320	57794944	57794944	26983822	1198.57	1.01412
Colon	Control_CD_2	Control_CD	Alb	ALBU_MOUSE	P07724	33	52%	1.3632e-14	0	24.9945	4123510	144722800	33427794	33427794	21023474	20873.9	241.764
Colon	Control_CD_3	Control_CD	Alb	ALBU_MOUSE	P07724	34	55.8%	1.3632e-14	0	24.8414	3738648.5	133282720	30062230	30062230	22011002	3944.11	1.61501
Colon	Control_CD_4	Control_CD	Alb	ALBU_MOUSE	P07724	34	54.4%	1.3632e-14	0	24.8452	3646311	139820688	30139476	30139476	18654756	3818.93	1
Colon	Control_CD_5	Control_CD	Alb	ALBU_MOUSE	P07724	35	54.8%	1.3632e-14	0	25.7196	6183098.4	252685056	55255556	55255556	27684042	1257.97	16.8665
Colon	Control_CD_6	Control_CD	Alb	ALBU_MOUSE	P07724	35	55.9%	1.3632e-14	0	25.7333	6860436.1	237897312	55782692	55782692	40090224	1421.2	1.58975
Colon	Proteinuric_AD_1	Proteinuric_AD	Alb	ALBU_MOUSE	P07724	24	44.2%	1.3632e-14	0	23.6419	1641962.1	53047928	13089766	13089766	5.43604e+06	1.31357e+06	488.305
Colon	Proteinuric_AD_2	Proteinuric_AD	Alb	ALBU_MOUSE	P07724	26	47.5%	1.3632e-14	0	23.5863	1328915.5	47244192	12594736	12594736	4579386	1.1034e+06	1855.72
Colon	Proteinuric_AD_3	Proteinuric_AD	Alb	ALBU_MOUSE	P07724	25	45.2%	1.3632e-14	0	23.8393	1720207.3	54965144	15008226	15008226	3.54437e+06	1.56555e+06	3437.26
Colon	Proteinuric_AD_4	Proteinuric_AD	Alb	ALBU_MOUSE	P07724	27	45.6%	1.3632e-14	0	23.6018	1495709	45709096	12730267	12730267	4.78895e+06	1.30562e+06	2409.38
Colon	Proteinuric_AD_5	Proteinuric_AD	Alb	ALBU_MOUSE	P07724	25	46.7%	1.3632e-14	0	22.8909	984479.6	31385800	7.77741e+06	7.77741e+06	2.30331e+06	905036	2023.41
Colon	Proteinuric_CD_1	Proteinuric_CD	Alb	ALBU_MOUSE	P07724	32	52.5%	1.3632e-14	0	24.0544	2217375.5	71122064	17421570	17421570	11560978	74037.8	147.707
Colon	Proteinuric_CD_2	Proteinuric_CD	Alb	ALBU_MOUSE	P07724	30	48%	1.3632e-14	0	24.3766	3429141.1	97748136	21780822	21780822	18366206	1298.47	1.62459
Colon	Proteinuric_CD_3	Proteinuric_CD	Alb	ALBU_MOUSE	P07724	31	50.3%	1.3632e-14	0	23.9398	1682899.6	67268112	16091119	16091119	8775237	1429.66	1
Colon	Proteinuric_CD_4	Proteinuric_CD	Alb	ALBU_MOUSE	P07724	32	51.6%	1.3632e-14	0	23.2813	1046131.1	44989504	10194291	10194291	5.02169e+06	2262.21	1.03877
Kid. Cortex	Control_AD_1	Control_AD	Alb	ALBU_MOUSE	P07724	20	39.8%	3.90268e-05	0.000222668	23.2193	1766476.3	45224828	9765985	9765985	1.60476e+06	1.1085e+06	241761
Kid. Cortex	Control_AD_2	Control_AD	Alb	ALBU_MOUSE	P07724	22	36.7%	3.90268e-05	0.000222668	22.8016	797309.7	28818486	7310928	7310928	572597	485547	132020
Kid. Cortex	Control_AD_3	Control_AD	Alb	ALBU_MOUSE	P07724	22	41.9%	3.90268e-05	0.000222668	23.6838	2393723.9	58182224	13475436	13475436	1.94064e+06	1.48447e+06	356055
Kid. Cortex	Control_AD_4	Control_AD	Alb	ALBU_MOUSE	P07724	23	43.3%	3.90268e-05	0.000222668	22.7945	1060990.2	29997054	7.27508e+06	7.27508e+06	875662	590692	121904
Kid. Cortex	Control_AD_5	Control_AD	Alb	ALBU_MOUSE	P07724	22	46.9%	3.90268e-05	0.000222668	23.238	1470979.8	38076184	9893154	9893154	1.10837e+06	680726	179642
Kid. Cortex	Control_CD_1	Control_CD	Alb	ALBU_MOUSE	P07724	21	40.5%	3.90268e-05	0.000222668	22.8004	1178670.2	33345594	7.30449e+06	7.30449e+06	1453700	2644.41	268.852
Kid. Cortex	Control_CD_2	Control_CD	Alb	ALBU_MOUSE	P07724	24	45.6%	3.90268e-05	0.000222668	23.5323	1858574.6	58943020	12132187	12132187	2.43649e+06	10390.8	1227.09
Kid. Cortex	Control_CD_3	Control_CD	Alb	ALBU_MOUSE	P07724	30	54.3%	3.90268e-05	0.000222668	24.0425		83331072	17278426	17278426	2.91978e+06	2555.31	10069.3
Kid. Cortex	Control_CD_4	Control_CD	Alb	ALBU_MOUSE	P07724	21	38.8%	3.90268e-05	0.000222668	22.6191	1039590.1	32516550	6.44208e+06	6.44208e+06	1.49702e+06	332.628	2631.62
Kid. Cortex	Control_CD_5	Control_CD	Alb	ALBU_MOUSE	P07724	22	42.8%	3.90268e-05	0.000222668	23.1513	1482993.5	40748484	9316058	9316058	1.79043e+06	2933.02	2464.35
Kid. Cortex	Proteinuric_AD_1	Proteinuric_AD	Alb	ALBU_MOUSE	P07724	44	69.7%	3.90268e-05	0.000222668	27.8037		1019618368	234278976	234278976	25462402	20353940	4380845
Kid. Cortex	Proteinuric_AD_2	Proteinuric_AD	Alb	ALBU_MOUSE	P07724	42	61%	3.90268e-05	0.000222668	27.6964		1035868800	217497888	217497888	22596972	11635045	5485780
Kid. Cortex	Proteinuric_AD_3	Proteinuric_AD	Alb	ALBU_MOUSE	P07724	45	71.2%	3.90268e-05	0.000222668	27.8151		1039033344	236145968	236145968	19474448	10250827	3.49595e+06
Kid. Cortex	Proteinuric_AD_4	Proteinuric_AD	Alb	ALBU_MOUSE	P07724	45	69.7%	3.90268e-05	0.000222668	27.4403		853692032	182115856	182115856	18130816	13031827	4.12388e+06
Kid. Cortex	Proteinuric_AD_5	Proteinuric_AD	Alb	ALBU_MOUSE	P07724	38	59.5%	3.90268e-05	0.000222668	27.4506		852512000	183427552	183427552	20505428	10726190	3.83359e+06
Kid. Cortex	Proteinuric_CD_1	Proteinuric_CD	Alb	ALBU_MOUSE	P07724	43	67.8%	3.90268e-05	0.000222668	26.8237		576401152	118778432	118778432	16423514	703.651	2142.84
Kid. Cortex	Proteinuric_CD_2	Proteinuric_CD	Alb	ALBU_MOUSE	P07724	45	69.2%	3.90268e-05	0.000222668	26.44	13943794.2	416246944	91042576	91042576	12506303	250.933	189.291
Kid. Cortex	Proteinuric_CD_3	Proteinuric_CD	Alb	ALBU_MOUSE	P07724	35	56.4%	3.90268e-05	0.000222668	25.6821	8263278.5	245574800	53835708	53835708	7.91377e+06	1984.38	429.616
Kid. Cortex	Proteinuric_CD_4	Proteinuric_CD	Alb	ALBU_MOUSE	P07724	39	60%	3.90268e-05	0.000222668	26.478	14772887.7	458661504	93470800	93470800	13787971	452.563	637.635
Duodenum	Control_AD_1	Control_AD	Alb	ALBU_MOUSE	P07724	28	51.8%	3.06794e-25	0	23.6451	1484077.4	63108132	13118548	13118548	4.10819e+06	766089	12291.6
Duodenum	Control_AD_2	Control_AD	Alb	ALBU_MOUSE	P07724	31	54.8%	3.06794e-25	0	24.7714	3636977	133452368	28637816	28637816	8051425	2.01048e+06	29768.9
Duodenum	Control_AD_3	Control_AD	Alb	ALBU_MOUSE	P07724	32	53.3%	3.06794e-25	0	25.1738	4319815.9	166099184	37849232	37849232	9628740	2.50617e+06	28211.3
Duodenum	Control_AD_4	Control_AD	Alb	ALBU_MOUSE	P07724	31	54.8%	3.06794e-25	0	25.0173	4636892	155255120	33960328	33960328	10107424	2.56193e+06	22552.3
Duodenum	Control_AD_5	Control_AD	Alb	ALBU_MOUSE	P07724	26	47%	3.06794e-25	0	24.9279	4614034.7	142294112	31918478	31918478	9677867	2.48962e+06	19718.3
Duodenum	Control_AD_6	Control_AD	Alb	ALBU_MOUSE	P07724	32	55.9%	3.06794e-25	0	25.237	4426606.1	170900704	39544752	39544752	10187618	2.51873e+06	28050.5
Duodenum	Control_CD_1	Control_CD	Alb	ALBU_MOUSE	P07724	28	47%	3.06794e-25	0	24.3473	2295480.7	101338048	21343082	21343082	9642797	146.84	404.52
Duodenum	Control_CD_2	Control_CD	Alb	ALBU_MOUSE	P07724	34	57.1%	3.06794e-25	0	25.4929	5282281.8	226887392	47218740	47218740	22492372	9375.2	1
Duodenum	Control_CD_3	Control_CD	Alb	ALBU_MOUSE	P07724	31	59.4%	3.06794e-25	0	25.3312	4858406.3	200140368	42213024	42213024	20898444	1	1
Duodenum	Control_CD_4	Control_CD	Alb	ALBU_MOUSE	P07724	31	58.2%	3.06794e-25	0	25.2683	4506483.7	203411280	40413188	40413188	21284668	1.00248	265.54
Duodenum	Control_CD_5	Control_CD	Alb	ALBU_MOUSE	P07724	33	55.9%	3.06794e-25	0	25.4779	5733698.5	231018576	46730156	46730156	26646506	115.237	60.5939
Duodenum	Control_CD_6	Control_CD	Alb	ALBU_MOUSE	P07724	32	54.8%	3.06794e-25	0	25.9334	6745422.4	277275264	64080596	64080596	29297900	1	265.227
Duodenum	Proteinuric_AD_1	Proteinuric_AD	Alb	ALBU_MOUSE	P07724	29	54.6%	3.06794e-25	0	25.2342	4682298	185618976	39467320	39467320	12032325	2.58279e+06	39866.8
Duodenum	Proteinuric_AD_2	Proteinuric_AD	Alb	ALBU_MOUSE	P07724	30	58.2%	3.06794e-25	0	24.3997	2532119.5	109645112	22133814	22133814	5739260	1.27306e+06	11038.7
Duodenum	Proteinuric_AD_3	Proteinuric_AD	Alb	ALBU_MOUSE	P07724	31	54.6%	3.06794e-25	0	25.7693	6967579.6	257985808	57191104	57191104	11745027	5206315	33755.3
Duodenum	Proteinuric_AD_4	Proteinuric_AD	Alb	ALBU_MOUSE	P07724	29	45.7%	3.06794e-25	0	24.6465	3088123.9	118603552	26261860	26261860	7042311	1.75468e+06	13443.7
Duodenum	Proteinuric_AD_5	Proteinuric_AD	Alb	ALBU_MOUSE	P07724	28	46.9%	3.06794e-25	0	24.0943	2039711.7	89953144	17910134	17910134	4.92661e+06	1.3632e+06	13203.2
Duodenum	Proteinuric_CD_1	Proteinuric_CD	Alb	ALBU_MOUSE	P07724	33	55.9%	3.06794e-25	0	24.5049	2287294.7	105175696	23806758	23806758	10526092	1	1
Duodenum	Proteinuric_CD_2	Proteinuric_CD	Alb	ALBU_MOUSE	P07724	29	45.7%	3.06794e-25	0	24.2639	2432008	96994632	20144358	20144358	9087136	1289.2	1
Duodenum	Proteinuric_CD_3	Proteinuric_CD	Alb	ALBU_MOUSE	P07724	33	59.5%	3.06794e-25	0	25.1419	4249316.2	165876848	37023036	37023036	16976628	1.00788	1.02356
Duodenum	Proteinuric_CD_4	Proteinuric_CD	Alb	ALBU_MOUSE	P07724	33	55.6%	3.06794e-25	0	24.6179	2840929.9	116255080	25747746	25747746	12283774	1.29689	1.29064
Erythrocytes	Control_AD_1	Control_AD	Alb	ALBU_MOUSE	P07724	46	58.7%	3.00728e-05	0	21.0923	366897.5	13243888	2235692	2235692	532869	224740	2379.65
Erythrocytes	Control_AD_2	Control_AD	Alb	ALBU_MOUSE	P07724	31	46.9%	3.00728e-05	0	19.0952	94297.5	3187538	560058	560058	184771	74519.1	320.062
Erythrocytes	Control_AD_3	Control_AD	Alb	ALBU_MOUSE	P07724	38	53.3%	3.00728e-05	0	21.4971	663189.8	17697386	2.95992e+06	2.95992e+06	1.94054e+06	545219	4178.51
Erythrocytes	Control_AD_4	Control_AD	Alb	ALBU_MOUSE	P07724	57	64.1%	3.00728e-05	0	24.3642		122404264	21595142	21595142	8811194	1.91016e+06	10744.8
Erythrocytes	Control_AD_5	Control_AD	Alb	ALBU_MOUSE	P07724	30	44.1%	3.00728e-05	0	19.8805	189145.7	6.05938e+06	965230	965230	575495	129993	829.981
Erythrocytes	Control_AD_6	Control_AD	Alb	ALBU_MOUSE	P07724	39	51.3%	3.00728e-05	0	20.7154	291865.6	11437732	1.72174e+06	1.72174e+06	550921	280012	1864.88
Erythrocytes	Control_CD_1	Control_CD	Alb	ALBU_MOUSE	P07724	34	49.2%	3.00728e-05	0	19.954	179018.7	6399660	1.01565e+06	1.01565e+06	399310	1	1
Erythrocytes	Control_CD_2	Control_CD	Alb	ALBU_MOUSE	P07724	41	56.7%	3.00728e-05	0	20.725	654706.8	11319907	1.73322e+06	1.73322e+06	5.46721e+06	1	1
Erythrocytes	Control_CD_3	Control_CD	Alb	ALBU_MOUSE	P07724	45	54.6%	3.00728e-05	0	22.0161	878047.3	24050648	4.24126e+06	4.24126e+06	4.47446e+06	1.02917	87.9749
Erythrocytes	Control_CD_4	Control_CD	Alb	ALBU_MOUSE	P07724	42	54.6%	3.00728e-05	0	21.6994	817725.5	18088718	3.40552e+06	3.40552e+06	4.30754e+06	3.43438	62.3288
Erythrocytes	Control_CD_5	Control_CD	Alb	ALBU_MOUSE	P07724	31	43.4%	3.00728e-05	0	20.1045	463084.2	7144064	1.12734e+06	1.12734e+06	1.42447e+06	1.18533	1.05761
Erythrocytes	Control_CD_6	Control_CD	Alb	ALBU_MOUSE	P07724	46	56.9%	3.00728e-05	0	22.0642	1028472.5	26671564	4385057	4385057	5181344	1	1
Erythrocytes	Proteinuric_AD_1	Proteinuric_AD	Alb	ALBU_MOUSE	P07724	26	41.3%	3.00728e-05	0	20.1923	244339.9	7913786	1.19806e+06	1.19806e+06	769079	154474	3.83568
Erythrocytes	Proteinuric_AD_2	Proteinuric_AD	Alb	ALBU_MOUSE	P07724	25	38.5%	3.00728e-05	0	21.3788	355162.7	13635768	2726817	2726817	575740	100402	5.0306
Erythrocytes	Proteinuric_AD_3	Proteinuric_AD	Alb	ALBU_MOUSE	P07724	35	52.1%	3.00728e-05	0	21.8282	712968.4	22668614	3.72353e+06	3.72353e+06	1.9252e+06	795356	4824.49
Erythrocytes	Proteinuric_AD_4	Proteinuric_AD	Alb	ALBU_MOUSE	P07724	44	54.4%	3.00728e-05	0	21.9234	629336.2	22458952	3.97755e+06	3.97755e+06	996566	473879	3222.94
Erythrocytes	Proteinuric_AD_5	Proteinuric_AD	Alb	ALBU_MOUSE	P07724	33	45.6%	3.00728e-05	0	19.9338	176347.9	5975567	1.00156e+06	1.00156e+06	272194	138548	971.313
Erythrocytes	Proteinuric_CD_1	Proteinuric_CD	Alb	ALBU_MOUSE	P07724	20	31.4%	3.00728e-05	0	19.168	118546.5	3.72128e+06	589018	589018	456456	180.027	1
Erythrocytes	Proteinuric_CD_2	Proteinuric_CD	Alb	ALBU_MOUSE	P07724	26	38.5%	3.00728e-05	0	18.8748	152752.6	3.11158e+06	480691	480691	908474	1.15572	1.46765
Erythrocytes	Proteinuric_CD_3	Proteinuric_CD	Alb	ALBU_MOUSE	P07724	30	40.5%	3.00728e-05	0	20.8948	722337.2	11718951	1.94968e+06	1.94968e+06	1.51263e+06	3.0925	1.27743
Erythrocytes	Proteinuric_CD_4	Proteinuric_CD	Alb	ALBU_MOUSE	P07724	24	33.4%	3.00728e-05	0	19.4815	208709.1	4.81448e+06	732029	732029	468071	3.04315	3.26706
Heart	Control_AD_1	Control_AD	Alb	ALBU_MOUSE	P07724	36	57.4%	2.19895e-06	0.000388651	22.0693	1202032.3	30944742	4.4007e+06	4.4007e+06	6041791	1.60353e+06	29491.7
Heart	Control_AD_2	Control_AD	Alb	ALBU_MOUSE	P07724	35	59%	2.19895e-06	0.000388651	22.1469	1410664.4	29155602	4.64396e+06	4.64396e+06	5.62929e+06	2.23257e+06	36457.2
Heart	Control_AD_3	Control_AD	Alb	ALBU_MOUSE	P07724	40	63.8%	2.19895e-06	0.000388651	23.0396	2025424	52594528	8622246	8622246	8871592	2.89283e+06	64893.7
Heart	Control_AD_4	Control_AD	Alb	ALBU_MOUSE	P07724	44	65.6%	2.19895e-06	0.000388651	23.3321	2469073	77562840	10559866	10559866	11007077	4.07774e+06	84338.1
Heart	Control_AD_5	Control_AD	Alb	ALBU_MOUSE	P07724	43	61.7%	2.19895e-06	0.000388651	23.3272	2429382.1	72964952	10524292	10524292	11462438	3432350	56468.2
Heart	Control_AD_6	Control_AD	Alb	ALBU_MOUSE	P07724	42	64.5%	2.19895e-06	0.000388651	23.1827	2322650.9	64523348	9521325	9521325	9660495	3.84417e+06	62969.9
Heart	Control_CD_1	Control_CD	Alb	ALBU_MOUSE	P07724	43	66.6%	2.19895e-06	0.000388651	23.3269	3047771.9	76274336	10521820	10521820	16938178	1.22076	1.22841
Heart	Control_CD_2	Control_CD	Alb	ALBU_MOUSE	P07724	44	64.5%	2.19895e-06	0.000388651	23.0461	2147046.8	52197756	8660795	8660795	11868276	54.6543	505.095
Heart	Control_CD_3	Control_CD	Alb	ALBU_MOUSE	P07724	45	64.6%	2.19895e-06	0.000388651	24.3547	4759006.7	134311440	21452792	21452792	26327890	2850.9	1.05716
Heart	Control_CD_4	Control_CD	Alb	ALBU_MOUSE	P07724	46	67.1%	2.19895e-06	0.000388651	23.7134	3412395.6	80477592	13754165	13754165	20005276	1.10576	290.77
Heart	Control_CD_5	Control_CD	Alb	ALBU_MOUSE	P07724	46	65.6%	2.19895e-06	0.000388651	24.728	6181436.8	183580896	27788490	27788490	36801456	1.17741	269.587
Heart	Control_CD_6	Control_CD	Alb	ALBU_MOUSE	P07724	44	64.5%	2.19895e-06	0.000388651	23.3621	3093868.4	69975440	10781554	10781554	20542288	1.06068	198.199
Heart	Proteinuric_AD_1	Proteinuric_AD	Alb	ALBU_MOUSE	P07724	37	61%	2.19895e-06	0.000388651	21.8585	1065530.2	26711626	3.80252e+06	3.80252e+06	3.78298e+06	995484	9627.06
Heart	Proteinuric_AD_2	Proteinuric_AD	Alb	ALBU_MOUSE	P07724	42	65.1%	2.19895e-06	0.000388651	22.9566	2842250.9	55947204	8.14006e+06	8.14006e+06	9762910	2385117	41936.4
Heart	Proteinuric_AD_3	Proteinuric_AD	Alb	ALBU_MOUSE	P07724	32	57.2%	2.19895e-06	0.000388651	21.5699	1334165.6	25320496	3.11315e+06	3.11315e+06	3296153	1.30998e+06	14565.6
Heart	Proteinuric_AD_4	Proteinuric_AD	Alb	ALBU_MOUSE	P07724	36	59.2%	2.19895e-06	0.000388651	22.0613	1015756.8	28337212	4.3764e+06	4.3764e+06	4.44537e+06	1.22302e+06	14267.1
Heart	Proteinuric_AD_5	Proteinuric_AD	Alb	ALBU_MOUSE	P07724	31	51.6%	2.19895e-06	0.000388651	21.3966	1261705.5	21477952	2.76079e+06	2.76079e+06	4.1413e+06	1.12469e+06	6895.71
Heart	Proteinuric_CD_1	Proteinuric_CD	Alb	ALBU_MOUSE	P07724	40	62%	2.19895e-06	0.000388651	22.5325	1562589.5	37280428	6066789	6066789	9746850	18757.4	1
Heart	Proteinuric_CD_2	Proteinuric_CD	Alb	ALBU_MOUSE	P07724	46	65.6%	2.19895e-06	0.000388651	23.3421	2834750	64817924	10633687	10633687	20393792	1	27.8154
Heart	Proteinuric_CD_3	Proteinuric_CD	Alb	ALBU_MOUSE	P07724	42	64.8%	2.19895e-06	0.000388651	22.8685	1971060	44050188	7.65776e+06	7.65776e+06	11698085	1	74.3364
Heart	Proteinuric_CD_4	Proteinuric_CD	Alb	ALBU_MOUSE	P07724	45	67.1%	2.19895e-06	0.000388651	23.5282	3186927.3	69548960	12097448	12097448	21027760	538.925	1106.37
Ileum	Control_AD_1	Control_AD	Alb	ALBU_MOUSE	P07724	32	58.4%	3.48411e-08	0	25.1807	8053829.3	173503440	38031744	38031744	18629224	4.8791e+06	95236
Ileum	Control_AD_2	Control_AD	Alb	ALBU_MOUSE	P07724	25	45.4%	3.48411e-08	0	24.7012	5401624.4	124255688	27276428	27276428	18971124	3.93486e+06	117631
Ileum	Control_AD_3	Control_AD	Alb	ALBU_MOUSE	P07724	30	55.8%	3.48411e-08	0	24.4295	3718034.5	110213416	22594540	22594540	10696669	3.54767e+06	66149.2
Ileum	Control_AD_4	Control_AD	Alb	ALBU_MOUSE	P07724	30	56.7%	3.48411e-08	0	24.8236	3990358.7	114063024	29692052	29692052	11295532	3.35311e+06	52767.9
Ileum	Control_AD_5	Control_AD	Alb	ALBU_MOUSE	P07724	33	60.7%	3.48411e-08	0	25.9898	9083883.8	267906128	66638280	66638280	25769824	8117165	163624
Ileum	Control_AD_6	Control_AD	Alb	ALBU_MOUSE	P07724	31	57.4%	3.48411e-08	0	25.9556	7910636.5	275718304	65075576	65075576	29927708	8.17746e+06	145187
Ileum	Control_CD_1	Control_CD	Alb	ALBU_MOUSE	P07724	35	60.9%	3.48411e-08	0	25.3076	5882715.7	188795136	41527232	41527232	23477750	1	1
Ileum	Control_CD_2	Control_CD	Alb	ALBU_MOUSE	P07724	28	48.4%	3.48411e-08	0	24.8601	4004314.2	137079376	30453102	30453102	17918412	16604.7	1.0893
Ileum	Control_CD_3	Control_CD	Alb	ALBU_MOUSE	P07724	34	60.7%	3.48411e-08	0	25.3205	5617671.6	190657696	41902332	41902332	24040116	134.495	127.388
Ileum	Control_CD_4	Control_CD	Alb	ALBU_MOUSE	P07724	35	60.4%	3.48411e-08	0	25.8641	8091233.3	274204992	61075452	61075452	39119000	243.842	1
Ileum	Control_CD_5	Control_CD	Alb	ALBU_MOUSE	P07724	37	63.7%	3.48411e-08	0	26.5193	11914978	381277696	96182208	96182208	51819900	1	1
Ileum	Control_CD_6	Control_CD	Alb	ALBU_MOUSE	P07724	32	55.8%	3.48411e-08	0	25.9121	9479047.2	261690704	63142044	63142044	43223588	1	1
Ileum	Proteinuric_AD_1	Proteinuric_AD	Alb	ALBU_MOUSE	P07724	29	55.9%	3.48411e-08	0	24.6118	3875805.6	125890624	25637794	25637794	12721539	2.91789e+06	30910.8
Ileum	Proteinuric_AD_2	Proteinuric_AD	Alb	ALBU_MOUSE	P07724	26	50.5%	3.48411e-08	0	24.2815	3134243.7	100954544	20392054	20392054	8647554	1.8812e+06	49931.1
Ileum	Proteinuric_AD_3	Proteinuric_AD	Alb	ALBU_MOUSE	P07724	26	48.2%	3.48411e-08	0	23.8088	2420579.1	69153640	14694299	14694299	6135805	2.39184e+06	38342.5
Ileum	Proteinuric_AD_4	Proteinuric_AD	Alb	ALBU_MOUSE	P07724	25	46.9%	3.48411e-08	0	24.3446	2995640.3	86216288	21304162	21304162	7.98108e+06	2.4885e+06	31906.6
Ileum	Proteinuric_AD_5	Proteinuric_AD	Alb	ALBU_MOUSE	P07724	30	58.2%	3.48411e-08	0	24.8004	4707245.7	120165792	29219706	29219706	13572992	4.61765e+06	52950.8
Ileum	Proteinuric_CD_1	Proteinuric_CD	Alb	ALBU_MOUSE	P07724	34	61.2%	3.48411e-08	0	24.921	4289603.7	135447856	31765686	31765686	20888674	5482.14	1
Ileum	Proteinuric_CD_2	Proteinuric_CD	Alb	ALBU_MOUSE	P07724	34	59.7%	3.48411e-08	0	24.7386	3625615.6	129891264	27993624	27993624	16882090	1	338.262
Ileum	Proteinuric_CD_3	Proteinuric_CD	Alb	ALBU_MOUSE	P07724	29	48.4%	3.48411e-08	0	24.4397	3645643.1	102549272	22754624	22754624	18309170	1	1.01173
Ileum	Proteinuric_CD_4	Proteinuric_CD	Alb	ALBU_MOUSE	P07724	29	49%	3.48411e-08	0	23.1501	1355405.2	45893276	9308157	9308157	5.78693e+06	1	1
Jejunum	Control_AD_1	Control_AD	Alb	ALBU_MOUSE	P07724	24	46.7%	2.49298e-16	0	24.1817	2645434.6	96875152	19029220	19029220	8823769	2.04745e+06	90044.6
Jejunum	Control_AD_2	Control_AD	Alb	ALBU_MOUSE	P07724	29	50%	2.49298e-16	0	24.4573	3503550.7	131187872	23035244	23035244	10728874	2.74243e+06	201059
Jejunum	Control_AD_3	Control_AD	Alb	ALBU_MOUSE	P07724	33	63.3%	2.49298e-16	0	25.4626	6396612	246368160	46237252	46237252	17873620	5658517	293618
Jejunum	Control_AD_4	Control_AD	Alb	ALBU_MOUSE	P07724	32	61%	2.49298e-16	0	25.21	5401654.3	207045120	38811044	38811044	14188065	4.22332e+06	239939
Jejunum	Control_AD_5	Control_AD	Alb	ALBU_MOUSE	P07724	31	60%	2.49298e-16	0	25.6282	6881592.7	295892032	51864000	51864000	18487460	4.66272e+06	273372
Jejunum	Control_AD_6	Control_AD	Alb	ALBU_MOUSE	P07724	26	48.5%	2.49298e-16	0	24.2131	2417262	105126952	19447112	19447112	6564788	2068930	192909
Jejunum	Control_CD_1	Control_CD	Alb	ALBU_MOUSE	P07724	25	49.3%	2.49298e-16	0	24.1637	1911994.7	107861216	18793048	18793048	8488366	1422.8	43.784
Jejunum	Control_CD_2	Control_CD	Alb	ALBU_MOUSE	P07724	29	58.4%	2.49298e-16	0	24.1941	2374157.8	109378840	19193600	19193600	9583921	27389.1	1695.43
Jejunum	Control_CD_3	Control_CD	Alb	ALBU_MOUSE	P07724	32	59.4%	2.49298e-16	0	26.1589	7695936.9	421891552	74922784	74922784	30452212	6.66514	837.621
Jejunum	Control_CD_4	Control_CD	Alb	ALBU_MOUSE	P07724	28	56.2%	2.49298e-16	0	25.5095	6138532.2	284517440	47768092	47768092	27989458	1	1257.29
Jejunum	Control_CD_5	Control_CD	Alb	ALBU_MOUSE	P07724	28	51.6%	2.49298e-16	0	24.8133	3252516.6	170401360	29482032	29482032	15423973	1	1
Jejunum	Control_CD_6	Control_CD	Alb	ALBU_MOUSE	P07724	27	55.9%	2.49298e-16	0	25.0481	4755052.9	190578912	34691988	34691988	19641236	1	1
Jejunum	Proteinuric_AD_1	Proteinuric_AD	Alb	ALBU_MOUSE	P07724	30	55.3%	2.49298e-16	0	25.4647	6474819.2	257977280	46307300	46307300	17761430	3935618	237982
Jejunum	Proteinuric_AD_2	Proteinuric_AD	Alb	ALBU_MOUSE	P07724	21	42.1%	2.49298e-16	0	23.6213	2158475.3	82794760	12904216	12904216	5.69686e+06	1115538	55053.9
Jejunum	Proteinuric_AD_3	Proteinuric_AD	Alb	ALBU_MOUSE	P07724	24	43.6%	2.49298e-16	0	23.9772	2738598.1	107845832	16514721	16514721	5406711	2241322	122151
Jejunum	Proteinuric_AD_4	Proteinuric_AD	Alb	ALBU_MOUSE	P07724	27	55.9%	2.49298e-16	0	24.4454	2891250.1	125348872	22844870	22844870	7818223	1.77317e+06	108019
Jejunum	Proteinuric_AD_5	Proteinuric_AD	Alb	ALBU_MOUSE	P07724	21	41.9%	2.49298e-16	0	22.9382	1415893.3	45892840	8036987	8036987	2491544	828512	61836.2
Jejunum	Proteinuric_CD_1	Proteinuric_CD	Alb	ALBU_MOUSE	P07724	27	51.3%	2.49298e-16	0	23.8131	1609927.1	77211768	14738133	14738133	7769522	1010.1	421.475
Jejunum	Proteinuric_CD_2	Proteinuric_CD	Alb	ALBU_MOUSE	P07724	30	54.9%	2.49298e-16	0	23.5663	1361004.7	65386208	12421504	12421504	8.16066e+06	1	55.5072
Jejunum	Proteinuric_CD_3	Proteinuric_CD	Alb	ALBU_MOUSE	P07724	29	53%	2.49298e-16	0	24.888	3711383.9	174298400	31047796	31047796	17528752	2678.57	1519.01
Jejunum	Proteinuric_CD_4	Proteinuric_CD	Alb	ALBU_MOUSE	P07724	25	44.7%	2.49298e-16	0	22.5887	842476.5	36092008	6307937	6307937	3.4104e+06	1	1
Liver	Control_AD_1	Control_AD	Alb	ALBU_MOUSE	P07724	30	52.5%	9.6809e-23	0	23.4324	2009027.4	62331940	11320316	11320316	108817	31691.1	1605.13
Liver	Control_AD_2	Control_AD	Alb	ALBU_MOUSE	P07724	28	48%	9.6809e-23	0	22.4344	1006991.2	32755356	5.66812e+06	5.66812e+06	69551.7	19049	1425.52
Liver	Control_AD_3	Control_AD	Alb	ALBU_MOUSE	P07724	29	48.4%	9.6809e-23	0	22.3546	1058376.5	26276334	5.36299e+06	5.36299e+06	76003.2	28380.8	304.956
Liver	Control_AD_4	Control_AD	Alb	ALBU_MOUSE	P07724	33	56.4%	9.6809e-23	0	24.1124	3208783.1	104270032	18136984	18136984	225248	42049.9	3002.05
Liver	Control_AD_5	Control_AD	Alb	ALBU_MOUSE	P07724	32	52.5%	9.6809e-23	0	22.7179	1440076.7	35979936	6.89878e+06	6.89878e+06	64831.3	20524.9	196.995
Liver	Control_AD_6	Control_AD	Alb	ALBU_MOUSE	P07724	29	47.2%	9.6809e-23	0	23.0644	1555913.5	46809236	8771816	8771816	97213.3	19281.8	1.1657
Liver	Control_CD_1	Control_CD	Alb	ALBU_MOUSE	P07724	37	56.2%	9.6809e-23	0	23.4031	1467343.8	54785372	11092566	11092566	122081	109.365	1
Liver	Control_CD_2	Control_CD	Alb	ALBU_MOUSE	P07724	37	56.6%	9.6809e-23	0	23.605	1993638.7	66640976	12758793	12758793	140700	125.453	1
Liver	Control_CD_3	Control_CD	Alb	ALBU_MOUSE	P07724	35	54.8%	9.6809e-23	0	22.4775	865313	28792974	5.84004e+06	5.84004e+06	58511	179.309	8.58967
Liver	Control_CD_4	Control_CD	Alb	ALBU_MOUSE	P07724	37	56.2%	9.6809e-23	0	23.1726	1335115.5	47224888	9454862	9454862	90639	1	602.918
Liver	Control_CD_5	Control_CD	Alb	ALBU_MOUSE	P07724	33	59%	9.6809e-23	0	23.5922	1559961.6	69061488	12645866	12645866	122950	1	234.798
Liver	Control_CD_6	Control_CD	Alb	ALBU_MOUSE	P07724	37	60%	9.6809e-23	0	24.1566	2585434.9	112474336	18700308	18700308	234964	91.4623	1
Liver	Proteinuric_AD_1	Proteinuric_AD	Alb	ALBU_MOUSE	P07724	33	53.8%	9.6809e-23	0	23.917	3129726	90136912	15839736	15839736	211353	51997.5	720.355
Liver	Proteinuric_AD_2	Proteinuric_AD	Alb	ALBU_MOUSE	P07724	32	52%	9.6809e-23	0	22.7361	1178979.7	40244176	6.98652e+06	6.98652e+06	61470.3	12166.3	1
Liver	Proteinuric_AD_3	Proteinuric_AD	Alb	ALBU_MOUSE	P07724	32	51.8%	9.6809e-23	0	23.1855	2156431.9	52851264	9539935	9539935	104266	34544.2	2232.31
Liver	Proteinuric_AD_4	Proteinuric_AD	Alb	ALBU_MOUSE	P07724	28	48.5%	9.6809e-23	0	22.8901	1817683.1	45264808	7.77337e+06	7.77337e+06	76522.6	23862.1	798.8
Liver	Proteinuric_AD_5	Proteinuric_AD	Alb	ALBU_MOUSE	P07724	31	56.4%	9.6809e-23	0	24.0121	3685187.3	109356160	16918588	16918588	150709	59032.6	3049.71
Liver	Proteinuric_CD_1	Proteinuric_CD	Alb	ALBU_MOUSE	P07724	33	55.1%	9.6809e-23	0	23.6035	2153683.8	64881540	12745445	12745445	140815	1	1.7145
Liver	Proteinuric_CD_2	Proteinuric_CD	Alb	ALBU_MOUSE	P07724	34	53.6%	9.6809e-23	0	23.5327	1631475.1	56365232	12135032	12135032	138344	158.139	1
Liver	Proteinuric_CD_3	Proteinuric_CD	Alb	ALBU_MOUSE	P07724	33	53%	9.6809e-23	0	23.1346	1335876.9	42869880	9208828	9208828	123868	1	1
Liver	Proteinuric_CD_4	Proteinuric_CD	Alb	ALBU_MOUSE	P07724	40	64.1%	9.6809e-23	0	23.5703	1699867.5	57770324	12455611	12455611	125651	1	3109.53
Lung	Control_AD_1	Control_AD	Alb	ALBU_MOUSE	P07724	54	70.1%	9.4622e-24	0	26.6136	16689636.6	578471424	102679360	102679360	46981888	13433485	89469.3
Lung	Control_AD_2	Control_AD	Alb	ALBU_MOUSE	P07724	50	70.2%	9.4622e-24	0	26.1352	9075841.6	389715936	73702320	73702320	19941106	10183193	87818.8
Lung	Control_AD_3	Control_AD	Alb	ALBU_MOUSE	P07724	51	70.1%	9.4622e-24	0	26.5221	15107734.8	523765792	96373672	96373672	43975948	16318745	88091
Lung	Control_AD_4	Control_AD	Alb	ALBU_MOUSE	P07724	50	71.9%	9.4622e-24	0	26.3956	12577635.2	527446464	88281720	88281720	26121098	10091763	50511.7
Lung	Control_AD_5	Control_AD	Alb	ALBU_MOUSE	P07724	59	77.8%	9.4622e-24	0	26.8633	18813447.1	701631936	122083048	122083048	44657920	13866375	96894
Lung	Control_AD_6	Control_AD	Alb	ALBU_MOUSE	P07724	54	71.5%	9.4622e-24	0	26.8268	16815069.1	683798336	119037696	119037696	50393276	17820558	102279
Lung	Control_CD_1	Control_CD	Alb	ALBU_MOUSE	P07724	55	70.4%	9.4622e-24	0	27.121	28157252.7	827088256	145959504	145959504	147822064	7710.79	1
Lung	Control_CD_2	Control_CD	Alb	ALBU_MOUSE	P07724	55	73%	9.4622e-24	0	26.0089	8896933.9	382823232	67525184	67525184	33061018	4121.52	1
Lung	Control_CD_3	Control_CD	Alb	ALBU_MOUSE	P07724	54	69.2%	9.4622e-24	0	27.2499	26625935.4	1016242624	159601024	159601024	139404624	669.776	9.98268
Lung	Control_CD_4	Control_CD	Alb	ALBU_MOUSE	P07724	57	74.7%	9.4622e-24	0	27.2224	21798002.2	945675200	156589344	156589344	119081528	1	1
Lung	Control_CD_5	Control_CD	Alb	ALBU_MOUSE	P07724	56	76.2%	9.4622e-24	0	27.5352	32026409.3	1280855936	194498000	194498000	158170640	10929.2	40.0604
Lung	Control_CD_6	Control_CD	Alb	ALBU_MOUSE	P07724	52	72.2%	9.4622e-24	0	26.0221	9744613.2	400700832	68142888	68142888	43400600	1878.82	1
Lung	Proteinuric_AD_1	Proteinuric_AD	Alb	ALBU_MOUSE	P07724	48	66.4%	9.4622e-24	0	26.1424	12738918.2	448811552	74070016	74070016	39556820	11650746	39008.1
Lung	Proteinuric_AD_2	Proteinuric_AD	Alb	ALBU_MOUSE	P07724	53	70.1%	9.4622e-24	0	26.636	13154821.5	673938304	104287320	104287320	39011244	11358980	53992
Lung	Proteinuric_AD_3	Proteinuric_AD	Alb	ALBU_MOUSE	P07724	45	64.3%	9.4622e-24	0	25.2328	5378272.2	235430208	39429808	39429808	10169178	5.20201e+06	37391.6
Lung	Proteinuric_AD_4	Proteinuric_AD	Alb	ALBU_MOUSE	P07724	53	72.2%	9.4622e-24	0	25.9691	8871056.3	383957408	65684752	65684752	25417742	8286323	42902.8
Lung	Proteinuric_AD_5	Proteinuric_AD	Alb	ALBU_MOUSE	P07724	49	71.2%	9.4622e-24	0	26.197	12722180.6	493537120	76929152	76929152	28749658	11643642	96474.2
Lung	Proteinuric_CD_1	Proteinuric_CD	Alb	ALBU_MOUSE	P07724	50	69.9%	9.4622e-24	0	25.6747	6822741.4	301608800	53561848	53561848	25446048	12703.3	271.598
Lung	Proteinuric_CD_2	Proteinuric_CD	Alb	ALBU_MOUSE	P07724	59	78.9%	9.4622e-24	0	26.7694	14211921.4	598452864	114393176	114393176	54847720	5540.1	445.954
Lung	Proteinuric_CD_3	Proteinuric_CD	Alb	ALBU_MOUSE	P07724	48	67.6%	9.4622e-24	0	25.7107	7194259	323883840	54913968	54913968	31338126	35942.9	1
Lung	Proteinuric_CD_4	Proteinuric_CD	Alb	ALBU_MOUSE	P07724	54	70.9%	9.4622e-24	0	26.6708	14049508.4	655405504	106837648	106837648	53056560	1	1
Kid. Medulla	Control_AD_1	Control_AD	Alb	ALBU_MOUSE	P07724	32	56.4%	4.8877e-17	0	24.763	5817186.7	147285696	28471286	28471286	12278614	4166458	57521.3
Kid. Medulla	Control_AD_2	Control_AD	Alb	ALBU_MOUSE	P07724	30	55.3%	4.8877e-17	0	23.989	3758276.3	93758920	16649600	16649600	11285903	3.25973e+06	48595.1
Kid. Medulla	Control_AD_3	Control_AD	Alb	ALBU_MOUSE	P07724	34	59%	4.8877e-17	0	24.4923	5326565.4	115993416	23600570	23600570	13338718	4.16681e+06	199356
Kid. Medulla	Control_AD_4	Control_AD	Alb	ALBU_MOUSE	P07724	24	43.8%	4.8877e-17	0	23.8572	3033508.6	72092128	15196609	15196609	7861885	1.82315e+06	67020.5
Kid. Medulla	Control_AD_5	Control_AD	Alb	ALBU_MOUSE	P07724	28	57.6%	4.8877e-17	0	24.526	4426943.5	125664152	24158368	24158368	11165746	2.51592e+06	125369
Kid. Medulla	Control_AD_6	Control_AD	Alb	ALBU_MOUSE	P07724	34	57.2%	4.8877e-17	0	24.1286	2870414.4	90124184	18341222	18341222	9540687	2.66518e+06	72893.3
Kid. Medulla	Control_CD_1	Control_CD	Alb	ALBU_MOUSE	P07724	33	60.7%	4.8877e-17	0	24.3688	3831895.6	102668088	21663904	21663904	17133304	2607.57	1
Kid. Medulla	Control_CD_2	Control_CD	Alb	ALBU_MOUSE	P07724	33	56.4%	4.8877e-17	0	24.8243	4769079	132218720	29706892	29706892	21160298	9674.32	1
Kid. Medulla	Control_CD_3	Control_CD	Alb	ALBU_MOUSE	P07724	39	59.5%	4.8877e-17	0	25.6276	9214530.2	257750688	51840600	51840600	48835292	2059.01	1
Kid. Medulla	Control_CD_4	Control_CD	Alb	ALBU_MOUSE	P07724	33	58.2%	4.8877e-17	0	23.7617	2643436.7	70977304	14222839	14222839	10716320	5054.44	1.08238
Kid. Medulla	Control_CD_5	Control_CD	Alb	ALBU_MOUSE	P07724	31	53%	4.8877e-17	0	24.0701	3107262.3	87052640	17612926	17612926	13991625	8637.66	1
Kid. Medulla	Control_CD_6	Control_CD	Alb	ALBU_MOUSE	P07724	38	59%	4.8877e-17	0	25.7033	8959155.3	248921056	54633704	54633704	41691220	12563.6	1
Kid. Medulla	Proteinuric_AD_1	Proteinuric_AD	Alb	ALBU_MOUSE	P07724	49	74.7%	4.8877e-17	0	27.7739	33997878.4	1198302336	229495904	229495904	53096828	18005062	1.23109e+06
Kid. Medulla	Proteinuric_AD_2	Proteinuric_AD	Alb	ALBU_MOUSE	P07724	48	69.1%	4.8877e-17	0	28.2008	37552726.4	1545877376	308515040	308515040	72442032	15249950	1.15132e+06
Kid. Medulla	Proteinuric_AD_3	Proteinuric_AD	Alb	ALBU_MOUSE	P07724	49	76.8%	4.8877e-17	0	27.8516	38232610.7	1240703744	242193392	242193392	77152496	16800296	795549
Kid. Medulla	Proteinuric_AD_4	Proteinuric_AD	Alb	ALBU_MOUSE	P07724	46	68.6%	4.8877e-17	0	27.7209	33750907.2	1127937792	221220544	221220544	68205104	13897865	1.28226e+06
Kid. Medulla	Proteinuric_AD_5	Proteinuric_AD	Alb	ALBU_MOUSE	P07724	52	75.2%	4.8877e-17	0	27.9084	35197085.9	1173297280	251916592	251916592	62281404	11733264	771955
Kid. Medulla	Proteinuric_CD_1	Proteinuric_CD	Alb	ALBU_MOUSE	P07724	47	67.8%	4.8877e-17	0	27.7677	28758393.1	1099428992	228505360	228505360	109424696	63.8026	1
Kid. Medulla	Proteinuric_CD_2	Proteinuric_CD	Alb	ALBU_MOUSE	P07724	49	72.7%	4.8877e-17	0	27.7727	27813956.8	1027333056	229313120	229313120	117780656	1542.96	1
Kid. Medulla	Proteinuric_CD_3	Proteinuric_CD	Alb	ALBU_MOUSE	P07724	46	68.8%	4.8877e-17	0	26.6367	15039136.3	480998496	104335720	104335720	61557004	1074.58	1
Kid. Medulla	Proteinuric_CD_4	Proteinuric_CD	Alb	ALBU_MOUSE	P07724	47	66.1%	4.8877e-17	0	26.9259	19062360.3	581137664	127498840	127498840	83383944	1500.01	1
Muscle	Control_AD_1	Control_AD	Alb	ALBU_MOUSE	P07724	30	58.6%	2.62556e-05	0	23.748	1664692.1	49739036	14088652	14088652	6635039	876725	69173.8
Muscle	Control_AD_2	Control_AD	Alb	ALBU_MOUSE	P07724	29	58.2%	2.62556e-05	0	23.7395	2072301.2	39859596	14005442	14005442	6366632	2.26237e+06	38721.8
Muscle	Control_AD_3	Control_AD	Alb	ALBU_MOUSE	P07724	31	59.7%	2.62556e-05	0	23.9156	1517799.3	46748372	15824320	15824320	5962667	1.22833e+06	46343.2
Muscle	Control_AD_4	Control_AD	Alb	ALBU_MOUSE	P07724	32	61.7%	2.62556e-05	0	24.3186	2562155.8	61193960	20923562	20923562	8704443	2.88866e+06	51464.6
Muscle	Control_AD_5	Control_AD	Alb	ALBU_MOUSE	P07724	36	64.5%	2.62556e-05	0	24.5123	2956944.7	72413656	23929840	23929840	9924184	3006636	59820.9
Muscle	Control_AD_6	Control_AD	Alb	ALBU_MOUSE	P07724	30	54.4%	2.62556e-05	0	24.54	3832463	67550728	24392966	24392966	9915781	2.65543e+06	76574.1
Muscle	Control_CD_1	Control_CD	Alb	ALBU_MOUSE	P07724	34	62.7%	2.62556e-05	0	25.6289	4966047.3	146778656	51889652	51889652	27090402	126.61	59.3353
Muscle	Control_CD_2	Control_CD	Alb	ALBU_MOUSE	P07724	32	61.7%	2.62556e-05	0	24.8704	3566185.8	82768848	30672130	30672130	16053614	132.864	83.6294
Muscle	Control_CD_3	Control_CD	Alb	ALBU_MOUSE	P07724	33	62%	2.62556e-05	0	25.4193	5515964.5	123709424	44870648	44870648	22257870	1.51548	188.195
Muscle	Control_CD_4	Control_CD	Alb	ALBU_MOUSE	P07724	35	64.8%	2.62556e-05	0	25.2703	5901846.5	117552544	40467856	40467856	25062664	1.79135	141.092
Muscle	Control_CD_5	Control_CD	Alb	ALBU_MOUSE	P07724	36	64.8%	2.62556e-05	0	26.7012	11294622.6	272202496	109109328	109109328	47638944	1.57773	1.51764
Muscle	Control_CD_6	Control_CD	Alb	ALBU_MOUSE	P07724	34	62.8%	2.62556e-05	0	25.5936	5548743.4	140838048	50635424	50635424	28970446	1.52978	66.6988
Muscle	Proteinuric_AD_1	Proteinuric_AD	Alb	ALBU_MOUSE	P07724	27	52.8%	2.62556e-05	0	23.0567	1128999.7	26053878	8724745	8724745	3.47801e+06	876389	16570.5
Muscle	Proteinuric_AD_2	Proteinuric_AD	Alb	ALBU_MOUSE	P07724	29	55.8%	2.62556e-05	0	23.555	1829827.4	41895960	12324297	12324297	4376259	567432	23021.9
Muscle	Proteinuric_AD_3	Proteinuric_AD	Alb	ALBU_MOUSE	P07724	30	60.2%	2.62556e-05	0	24.1136	2778273.7	50794792	18151124	18151124	4.74966e+06	1.18597e+06	54318.5
Muscle	Proteinuric_AD_4	Proteinuric_AD	Alb	ALBU_MOUSE	P07724	29	55.4%	2.62556e-05	0	23.3903	1749736.3	31285854	10994397	10994397	5.29273e+06	1.52308e+06	18105.4
Muscle	Proteinuric_AD_5	Proteinuric_AD	Alb	ALBU_MOUSE	P07724	27	55.8%	2.62556e-05	0	23.0146	1046307.7	25696986	8474069	8474069	2566195	327726	28842.4
Muscle	Proteinuric_CD_1	Proteinuric_CD	Alb	ALBU_MOUSE	P07724	29	56.9%	2.62556e-05	0	23.5626	1822769.8	40058348	12389386	12389386	8219949	2560.61	342.728
Muscle	Proteinuric_CD_2	Proteinuric_CD	Alb	ALBU_MOUSE	P07724	35	63.5%	2.62556e-05	0	24.2007	2200902.2	55289048	19281750	19281750	9753192	1.62861	84.9965
Muscle	Proteinuric_CD_3	Proteinuric_CD	Alb	ALBU_MOUSE	P07724	35	62.5%	2.62556e-05	0	24.3152	2738329.4	58829248	20874278	20874278	12286477	5192.08	83.7966
Muscle	Proteinuric_CD_4	Proteinuric_CD	Alb	ALBU_MOUSE	P07724	34	63.3%	2.62556e-05	0	24.1937	2847662.9	59878412	19188132	19188132	11811389	85.4996	36.387
Plasma	Control_AD_1	Control_AD	Alb	ALBU_MOUSE	P07724	59	78.6%	4.19982e-21	0	28.7151		2932794112	440675616	440675616	226792080	45472376	1.97264e+06
Plasma	Control_AD_2	Control_AD	Alb	ALBU_MOUSE	P07724	63	80.6%	4.19982e-21	0	28.5131		2635690240	383090784	383090784	202330560	54785608	2.22677e+06
Plasma	Control_AD_3	Control_AD	Alb	ALBU_MOUSE	P07724	66	81.9%	4.19982e-21	0	29.203		4354855424	617987904	617987904	308867264	75927160	2583990
Plasma	Control_AD_4	Control_AD	Alb	ALBU_MOUSE	P07724	64	80.8%	4.19982e-21	0	29.1876		4153154560	611408256	611408256	333965056	62659960	2.56353e+06
Plasma	Control_AD_5	Control_AD	Alb	ALBU_MOUSE	P07724	61	78.9%	4.19982e-21	0	29.1522		4304776192	596623552	596623552	347616768	68541488	2554804
Plasma	Control_AD_6	Control_AD	Alb	ALBU_MOUSE	P07724	59	78%	4.19982e-21	0	29.2701		4535065088	647394752	647394752	299573888	67124872	2.8814e+06
Plasma	Control_CD_1	Control_CD	Alb	ALBU_MOUSE	P07724	65	81.2%	4.19982e-21	0	29.2818		4639690752	652696000	652696000	502387584	1	14758
Plasma	Control_CD_2	Control_CD	Alb	ALBU_MOUSE	P07724	64	80.8%	4.19982e-21	0	29.0585		3684194048	559083456	559083456	509034368	89.0627	15624.6
Plasma	Control_CD_3	Control_CD	Alb	ALBU_MOUSE	P07724	63	80.1%	4.19982e-21	0	29.1817		4245891584	608929216	608929216	472419168	703.271	8801.93
Plasma	Control_CD_4	Control_CD	Alb	ALBU_MOUSE	P07724	63	77.3%	4.19982e-21	0	29.3581		4529802240	688143616	688143616	592189376	1	7928.04
Plasma	Control_CD_5	Control_CD	Alb	ALBU_MOUSE	P07724	67	80.1%	4.19982e-21	0	29.413		4953871360	714822208	714822208	592736000	2032.83	20692.3
Plasma	Control_CD_6	Control_CD	Alb	ALBU_MOUSE	P07724	61	78%	4.19982e-21	0	29.6165		5555811328	823129920	823129920	676178816	1.0119	16206.9
Plasma	Proteinuric_AD_1	Proteinuric_AD	Alb	ALBU_MOUSE	P07724	57	77.6%	4.19982e-21	0	28.5674		2469229568	397785120	397785120	172108848	38925248	1.02426e+06
Plasma	Proteinuric_AD_2	Proteinuric_AD	Alb	ALBU_MOUSE	P07724	61	77.1%	4.19982e-21	0	28.6219		2846344192	413081760	413081760	206951664	40803832	1.37432e+06
Plasma	Proteinuric_AD_3	Proteinuric_AD	Alb	ALBU_MOUSE	P07724	60	78%	4.19982e-21	0	28.4365		2715276032	363268256	363268256	172687936	53657444	1806225
Plasma	Proteinuric_AD_4	Proteinuric_AD	Alb	ALBU_MOUSE	P07724	59	78.8%	4.19982e-21	0	27.6218		1536839296	206527792	206527792	180967056	33495782	663676
Plasma	Proteinuric_AD_5	Proteinuric_AD	Alb	ALBU_MOUSE	P07724	56	75.7%	4.19982e-21	0	28.2162		2193698304	311827392	311827392	186064640	48814780	1608265
Plasma	Proteinuric_CD_1	Proteinuric_CD	Alb	ALBU_MOUSE	P07724	62	81.4%	4.19982e-21	0	28.6555		2748530432	422842848	422842848	373187136	287.22	13236.2
Plasma	Proteinuric_CD_2	Proteinuric_CD	Alb	ALBU_MOUSE	P07724	65	80.4%	4.19982e-21	0	29.1977		3924711680	615721088	615721088	404226656	110195	11193.8
Plasma	Proteinuric_CD_3	Proteinuric_CD	Alb	ALBU_MOUSE	P07724	65	81.2%	4.19982e-21	0	28.8508		3411953152	484134912	484134912	359352576	1	9841.6
Plasma	Proteinuric_CD_4	Proteinuric_CD	Alb	ALBU_MOUSE	P07724	62	80.1%	4.19982e-21	0	28.8465		3436618752	482672320	482672320	385343168	1	10604
Spleen	Control_AD_1	Control_AD	Alb	ALBU_MOUSE	P07724	27	48.4%	3.35008e-22	0	23.1101	1023238.7	25032200	9053846	9053846	5313786	1.28408e+06	17621.1
Spleen	Control_AD_2	Control_AD	Alb	ALBU_MOUSE	P07724	27	49.2%	3.35008e-22	0	23.4997	1431993.9	29777416	11860676	11860676	7.10729e+06	2.58919e+06	17711.9
Spleen	Control_AD_3	Control_AD	Alb	ALBU_MOUSE	P07724	27	48.2%	3.35008e-22	0	22.5609	729416.8	14109439	6.18758e+06	6.18758e+06	3.12146e+06	975611	13141.9
Spleen	Control_AD_4	Control_AD	Alb	ALBU_MOUSE	P07724	28	50.2%	3.35008e-22	0	23.636	1866311	38892408	13036332	13036332	7363596	2.24421e+06	17355.8
Spleen	Control_AD_5	Control_AD	Alb	ALBU_MOUSE	P07724	25	45.1%	3.35008e-22	0	23.3427	1769555.5	24761146	10637563	10637563	5845624	1.66271e+06	16132.6
Spleen	Control_AD_6	Control_AD	Alb	ALBU_MOUSE	P07724	27	49.2%	3.35008e-22	0	23.1092	1027877.5	24516166	9048112	9048112	5.2208e+06	1.58547e+06	11624.9
Spleen	Control_CD_1	Control_CD	Alb	ALBU_MOUSE	P07724	28	49.5%	3.35008e-22	0	23.6368	2254504.2	41475116	13043359	13043359	10727025	1113.98	1.54303
Spleen	Control_CD_2	Control_CD	Alb	ALBU_MOUSE	P07724	27	49.2%	3.35008e-22	0	24.0624	3642012.1	50040728	17518496	17518496	17430154	1181.72	1
Spleen	Control_CD_3	Control_CD	Alb	ALBU_MOUSE	P07724	31	55.3%	3.35008e-22	0	24.7258	4373755.2	81638360	27747034	27747034	19502310	2.87435	201.101
Spleen	Control_CD_4	Control_CD	Alb	ALBU_MOUSE	P07724	28	49.7%	3.35008e-22	0	23.8977	2471231.2	47173360	15629194	15629194	13317336	1.18395	1.1403
Spleen	Control_CD_5	Control_CD	Alb	ALBU_MOUSE	P07724	30	53.1%	3.35008e-22	0	24.2722	2091044.5	58959948	20260740	20260740	14228699	1.37434	133.884
Spleen	Control_CD_6	Control_CD	Alb	ALBU_MOUSE	P07724	30	54.1%	3.35008e-22	0	24.0902	3172330.5	50302132	17859890	17859890	14529864	1.25732	3.31908
Spleen	Proteinuric_AD_1	Proteinuric_AD	Alb	ALBU_MOUSE	P07724	30	53.9%	3.35008e-22	0	24.292	3695025.9	57485520	20540994	20540994	10770518	2.79309e+06	21828.3
Spleen	Proteinuric_AD_2	Proteinuric_AD	Alb	ALBU_MOUSE	P07724	27	48.4%	3.35008e-22	0	22.6417	763614	17605062	6.54395e+06	6.54395e+06	3794261	822758	7941.82
Spleen	Proteinuric_AD_3	Proteinuric_AD	Alb	ALBU_MOUSE	P07724	28	50.2%	3.35008e-22	0	23.0403	1152434.8	22494228	8626259	8626259	4483734	1.8637e+06	15932.5
Spleen	Proteinuric_AD_4	Proteinuric_AD	Alb	ALBU_MOUSE	P07724	28	51%	3.35008e-22	0	24.095	3027327.8	48759316	17919350	17919350	8966768	2487603	15855
Spleen	Proteinuric_AD_5	Proteinuric_AD	Alb	ALBU_MOUSE	P07724	27	48.5%	3.35008e-22	0	22.5366	1350766.2	18557520	6083860	6083860	3.49528e+06	1.08425e+06	11920.7
Spleen	Proteinuric_CD_1	Proteinuric_CD	Alb	ALBU_MOUSE	P07724	30	53.9%	3.35008e-22	0	23.6314	2079808.5	38792828	12994597	12994597	10443396	453.586	1
Spleen	Proteinuric_CD_2	Proteinuric_CD	Alb	ALBU_MOUSE	P07724	29	51.6%	3.35008e-22	0	24.1266	3098911.7	54604184	18315498	18315498	15732964	1	1
Spleen	Proteinuric_CD_3	Proteinuric_CD	Alb	ALBU_MOUSE	P07724	29	51.8%	3.35008e-22	0	24.3349	3867070.7	62917332	21161214	21161214	21251144	1	57.0118
Spleen	Proteinuric_CD_4	Proteinuric_CD	Alb	ALBU_MOUSE	P07724	28	50.2%	3.35008e-22	0	22.7482	1245541.4	21563280	7044955	7044955	6.06009e+06	1.65815	1.67486
Urine	Control_AD_1	Control_AD	Alb	ALBU_MOUSE	P07724	64	83.4%	4.56449e-09	0	26.5652	29481014.3	482249312	99295248	99295248	117441864	32158.4	288.477
Urine	Control_AD_2	Control_AD	Alb	ALBU_MOUSE	P07724	59	82.6%	4.56449e-09	0	25.3114		223531952	41638736	41638736	56219808	78392.9	163.164
Urine	Control_AD_3	Control_AD	Alb	ALBU_MOUSE	P07724	43	73.4%	4.56449e-09	0	24.0249	4318758	72536480	17069074	17069074	14389584	2.3338e+06	236361
Urine	Control_AD_4	Control_AD	Alb	ALBU_MOUSE	P07724	46	74.2%	4.56449e-09	0	22.7289	2572604.1	33363490	6951592	6951592	7569737	2.31817e+06	254543
Urine	Control_AD_5	Control_AD	Alb	ALBU_MOUSE	P07724	66	85.2%	4.56449e-09	0	27.0393		829968000	137920208	137920208	74663168	14719611	249769
Urine	Control_AD_6	Control_AD	Alb	ALBU_MOUSE	P07724	61	83.4%	4.56449e-09	0	26.6096		611935168	102397352	102397352	36287328	9409941	197921
Urine	Control_CD_1	Control_CD	Alb	ALBU_MOUSE	P07724	70	85.7%	4.56449e-09	0	27.4488	42280979.6	1049879424	183195504	183195504	174247472	1	1
Urine	Control_CD_2	Control_CD	Alb	ALBU_MOUSE	P07724	68	85.4%	4.56449e-09	0	27.2937		1030502400	164517744	164517744	124984616	1331.99	2.66043
Urine	Control_CD_3	Control_CD	Alb	ALBU_MOUSE	P07724	72	86.8%	4.56449e-09	0	28.0353		1603610368	275088160	275088160	130089400	2691.63	1
Urine	Control_CD_4	Control_CD	Alb	ALBU_MOUSE	P07724	49	76.2%	4.56449e-09	0	24.1334	5976525.1	93889152	18403142	18403142	20446874	21925.8	527.123
Urine	Proteinuric_AD_1	Proteinuric_AD	Alb	ALBU_MOUSE	P07724	65	85.2%	4.56449e-09	0	27.1741		1012871744	151432416	151432416	67086284	11096674	666452
Urine	Proteinuric_AD_2	Proteinuric_AD	Alb	ALBU_MOUSE	P07724	69	86.3%	4.56449e-09	0	27.4265		1076183680	180379664	180379664	78193744	3.35432e+06	286107
Urine	Proteinuric_AD_3	Proteinuric_AD	Alb	ALBU_MOUSE	P07724	61	82.4%	4.56449e-09	0	26.5573	61203146.6	477027520	98748840	98748840	266088896	1.03832e+06	2412.67
Urine	Proteinuric_AD_4	Proteinuric_AD	Alb	ALBU_MOUSE	P07724	58	82.1%	4.56449e-09	0	26.4766		535851328	93379800	93379800	348517504	181406	8.2293
Urine	Proteinuric_CD_1	Proteinuric_CD	Alb	ALBU_MOUSE	P07724	42	70.1%	4.56449e-09	0	23.9488	8236702.8	79214248	16191859	16191859	40622628	201475	383.619
Urine	Proteinuric_CD_2	Proteinuric_CD	Alb	ALBU_MOUSE	P07724	42	67.1%	4.56449e-09	0	23.6245	4968270.6	75440792	12932322	12932322	15163602	74443	569.112
Urine	Proteinuric_CD_3	Proteinuric_CD	Alb	ALBU_MOUSE	P07724	54	82.4%	4.56449e-09	0	26.2617		467675520	80457784	80457784	51734816	27976.2	2164.74

## Sheet: Brain
Organ	Sample	R.Condition	PG.Genes	PG.ProteinNames	PG.UniProtIds	PG.NrOfStrippedSequencesUsedForQuantification	PG.Coverage	PG.Pvalue	PG.Qvalue	PG.Log2Quantity	PG.IBAQ	PG.MS1Quantity	PG.MS2Quantity	PG.Quantity	PG.MS2Channel1	PG.MS2Channel2	PG.MS2Channel3
Brain	Control_AD_1	Control_AD	Alb	ALBU_MOUSE	P07724	23	43.8%	1.16364e-10	0	21.5302	381786.6	17614204	3028580	3028580	979017	216775	53487.1
Brain	Control_AD_2	Control_AD	Alb	ALBU_MOUSE	P07724	21	39.3%	1.16364e-10	0	20.8976	286064.1	11896485	1953407	1953407	660629	133646	35129.8
Brain	Control_AD_3	Control_AD	Alb	ALBU_MOUSE	P07724	24	41.9%	1.16364e-10	0	21.5549	396102.9	17616664	3080773	3080773	946126	240469	53294.2
Brain	Control_AD_4	Control_AD	Alb	ALBU_MOUSE	P07724	24	43.3%	1.16364e-10	0	21.9252	494327.5	23722894	3.98229e+06	3.98229e+06	1303251	292548	82038.4
Brain	Control_AD_5	Control_AD	Alb	ALBU_MOUSE	P07724	25	43.1%	1.16364e-10	0	22.1829	568327.1	28214800	4.76117e+06	4.76117e+06	1.42905e+06	345044	99578.9
Brain	Control_AD_6	Control_AD	Alb	ALBU_MOUSE	P07724	24	43.3%	1.16364e-10	0	21.6449	396700.9	19536702	3.27907e+06	3.27907e+06	852727	207613	71031.3
Brain	Control_CD_1	Control_CD	Alb	ALBU_MOUSE	P07724	25	44.7%	1.16364e-10	0	23.0676	892351.1	56621088	8791293	8791293	3.11606e+06	1	1
Brain	Control_CD_2	Control_CD	Alb	ALBU_MOUSE	P07724	25	42.1%	1.16364e-10	0	22.6939	665563.2	40494308	6.78515e+06	6.78515e+06	2.56678e+06	2108.69	260.324
Brain	Control_CD_3	Control_CD	Alb	ALBU_MOUSE	P07724	28	47%	1.16364e-10	0	23.826	1685954.2	95529976	14870852	14870852	5.13475e+06	1025.7	1
Brain	Control_CD_4	Control_CD	Alb	ALBU_MOUSE	P07724	30	49.8%	1.16364e-10	0	23.3714	1099793.6	72040776	10851733	10851733	4058984	1	26.5146
Brain	Control_CD_5	Control_CD	Alb	ALBU_MOUSE	P07724	25	43.3%	1.16364e-10	0	22.0478	421254.4	29628170	4.3357e+06	4.3357e+06	1.62529e+06	1259.41	1
Brain	Control_CD_6	Control_CD	Alb	ALBU_MOUSE	P07724	28	44.7%	1.16364e-10	0	22.7917	746090.4	48179152	7.26102e+06	7.26102e+06	2.58592e+06	1652.03	24.2915
Brain	Proteinuric_AD_1	Proteinuric_AD	Alb	ALBU_MOUSE	P07724	25	45.1%	1.16364e-10	0	23.4781	1718797.4	75504664	11684746	11684746	3.73219e+06	919327	259234
Brain	Proteinuric_AD_2	Proteinuric_AD	Alb	ALBU_MOUSE	P07724	22	40.6%	1.16364e-10	0	20.3745	165946.7	8953849	1.35933e+06	1.35933e+06	456744	83133	11264.4
Brain	Proteinuric_AD_3	Proteinuric_AD	Alb	ALBU_MOUSE	P07724	23	40.6%	1.16364e-10	0	21.6398	502276.7	17521796	3267497	3267497	939622	308090	83522.8
Brain	Proteinuric_AD_4	Proteinuric_AD	Alb	ALBU_MOUSE	P07724	23	41.8%	1.16364e-10	0	21.7407	495394.4	20792490	3504278	3504278	1102565	252680	73763.6
Brain	Proteinuric_AD_5	Proteinuric_AD	Alb	ALBU_MOUSE	P07724	24	42.3%	1.16364e-10	0	21.0835	294955.9	13599509	2222045	2222045	563491	134398	68251.4
Brain	Proteinuric_CD_1	Proteinuric_CD	Alb	ALBU_MOUSE	P07724	24	43.8%	1.16364e-10	0	23.0225	976178.2	55556764	8520300	8520300	3.42344e+06	506.375	1
Brain	Proteinuric_CD_2	Proteinuric_CD	Alb	ALBU_MOUSE	P07724	23	41.8%	1.16364e-10	0	22.1855	551182.9	27758614	4.76972e+06	4.76972e+06	2088899	312.047	1
Brain	Proteinuric_CD_3	Proteinuric_CD	Alb	ALBU_MOUSE	P07724	25	42.6%	1.16364e-10	0	21.5569	284886.2	17965298	3085091	3085091	1129876	793.678	209.416
Brain	Proteinuric_CD_4	Proteinuric_CD	Alb	ALBU_MOUSE	P07724	23	41.6%	1.16364e-10	0	21.6152	278293.6	19541412	3212434	3212434	1.09299e+06	2458.86	32.4013

## Sheet: Colon
Organ	Sample	R.Condition	PG.Genes	PG.ProteinNames	PG.UniProtIds	PG.NrOfStrippedSequencesUsedForQuantification	PG.Coverage	PG.Pvalue	PG.Qvalue	PG.Log2Quantity	PG.IBAQ	PG.MS1Quantity	PG.MS2Quantity	PG.Quantity	PG.MS2Channel1	PG.MS2Channel2	PG.MS2Channel3
Colon	Control_AD_1	Control_AD	Alb	ALBU_MOUSE	P07724	27	48.5%	1.3632e-14	0	23.7485	1572619.7	52708496	14092764	14092764	4588579	1.22177e+06	3889.98
Colon	Control_AD_2	Control_AD	Alb	ALBU_MOUSE	P07724	29	49.5%	1.3632e-14	0	24.6454	3287287.4	94852848	26242348	26242348	8649788	2.91465e+06	9421.46
Colon	Control_AD_3	Control_AD	Alb	ALBU_MOUSE	P07724	28	47.9%	1.3632e-14	0	24.9167	3619000.8	123436232	31672714	31672714	10081973	3568996	8774.74
Colon	Control_AD_4	Control_AD	Alb	ALBU_MOUSE	P07724	29	51.5%	1.3632e-14	0	25.1243	3808573.9	143754592	36572484	36572484	9985692	3.29195e+06	9784.48
Colon	Control_AD_5	Control_AD	Alb	ALBU_MOUSE	P07724	31	53.9%	1.3632e-14	0	24.9368	3742499.9	128945992	32116906	32116906	9778584	2.8259e+06	8889.81
Colon	Control_AD_6	Control_AD	Alb	ALBU_MOUSE	P07724	30	51.6%	1.3632e-14	0	24.4845	2744609.8	102746144	23473052	23473052	7206559	2460753	8028.09
Colon	Control_CD_1	Control_CD	Alb	ALBU_MOUSE	P07724	36	54.6%	1.3632e-14	0	25.7844	5805850.7	269332320	57794944	57794944	26983822	1198.57	1.01412
Colon	Control_CD_2	Control_CD	Alb	ALBU_MOUSE	P07724	33	52%	1.3632e-14	0	24.9945	4123510	144722800	33427794	33427794	21023474	20873.9	241.764
Colon	Control_CD_3	Control_CD	Alb	ALBU_MOUSE	P07724	34	55.8%	1.3632e-14	0	24.8414	3738648.5	133282720	30062230	30062230	22011002	3944.11	1.61501
Colon	Control_CD_4	Control_CD	Alb	ALBU_MOUSE	P07724	34	54.4%	1.3632e-14	0	24.8452	3646311	139820688	30139476	30139476	18654756	3818.93	1
Colon	Control_CD_5	Control_CD	Alb	ALBU_MOUSE	P07724	35	54.8%	1.3632e-14	0	25.7196	6183098.4	252685056	55255556	55255556	27684042	1257.97	16.8665
Colon	Control_CD_6	Control_CD	Alb	ALBU_MOUSE	P07724	35	55.9%	1.3632e-14	0	25.7333	6860436.1	237897312	55782692	55782692	40090224	1421.2	1.58975
Colon	Proteinuric_AD_1	Proteinuric_AD	Alb	ALBU_MOUSE	P07724	24	44.2%	1.3632e-14	0	23.6419	1641962.1	53047928	13089766	13089766	5.43604e+06	1.31357e+06	488.305
Colon	Proteinuric_AD_2	Proteinuric_AD	Alb	ALBU_MOUSE	P07724	26	47.5%	1.3632e-14	0	23.5863	1328915.5	47244192	12594736	12594736	4579386	1.1034e+06	1855.72
Colon	Proteinuric_AD_3	Proteinuric_AD	Alb	ALBU_MOUSE	P07724	25	45.2%	1.3632e-14	0	23.8393	1720207.3	54965144	15008226	15008226	3.54437e+06	1.56555e+06	3437.26
Colon	Proteinuric_AD_4	Proteinuric_AD	Alb	ALBU_MOUSE	P07724	27	45.6%	1.3632e-14	0	23.6018	1495709	45709096	12730267	12730267	4.78895e+06	1.30562e+06	2409.38
Colon	Proteinuric_AD_5	Proteinuric_AD	Alb	ALBU_MOUSE	P07724	25	46.7%	1.3632e-14	0	22.8909	984479.6	31385800	7.77741e+06	7.77741e+06	2.30331e+06	905036	2023.41
Colon	Proteinuric_CD_1	Proteinuric_CD	Alb	ALBU_MOUSE	P07724	32	52.5%	1.3632e-14	0	24.0544	2217375.5	71122064	17421570	17421570	11560978	74037.8	147.707
Colon	Proteinuric_CD_2	Proteinuric_CD	Alb	ALBU_MOUSE	P07724	30	48%	1.3632e-14	0	24.3766	3429141.1	97748136	21780822	21780822	18366206	1298.47	1.62459
Colon	Proteinuric_CD_3	Proteinuric_CD	Alb	ALBU_MOUSE	P07724	31	50.3%	1.3632e-14	0	23.9398	1682899.6	67268112	16091119	16091119	8775237	1429.66	1
Colon	Proteinuric_CD_4	Proteinuric_CD	Alb	ALBU_MOUSE	P07724	32	51.6%	1.3632e-14	0	23.2813	1046131.1	44989504	10194291	10194291	5.02169e+06	2262.21	1.03877

## Sheet: Kid. Cortex
Organ	Sample	R.Condition	PG.Genes	PG.ProteinNames	PG.UniProtIds	PG.NrOfStrippedSequencesUsedForQuantification	PG.Coverage	PG.Pvalue	PG.Qvalue	PG.Log2Quantity	PG.IBAQ	PG.MS1Quantity	PG.MS2Quantity	PG.Quantity	PG.MS2Channel1	PG.MS2Channel2	PG.MS2Channel3
Kid. Cortex	Control_AD_1	Control_AD	Alb	ALBU_MOUSE	P07724	20	39.8%	3.90268e-05	0.000222668	23.2193	1766476.3	45224828	9765985	9765985	1.60476e+06	1.1085e+06	241761
Kid. Cortex	Control_AD_2	Control_AD	Alb	ALBU_MOUSE	P07724	22	36.7%	3.90268e-05	0.000222668	22.8016	797309.7	28818486	7310928	7310928	572597	485547	132020
Kid. Cortex	Control_AD_3	Control_AD	Alb	ALBU_MOUSE	P07724	22	41.9%	3.90268e-05	0.000222668	23.6838	2393723.9	58182224	13475436	13475436	1.94064e+06	1.48447e+06	356055
Kid. Cortex	Control_AD_4	Control_AD	Alb	ALBU_MOUSE	P07724	23	43.3%	3.90268e-05	0.000222668	22.7945	1060990.2	29997054	7.27508e+06	7.27508e+06	875662	590692	121904
Kid. Cortex	Control_AD_5	Control_AD	Alb	ALBU_MOUSE	P07724	22	46.9%	3.90268e-05	0.000222668	23.238	1470979.8	38076184	9893154	9893154	1.10837e+06	680726	179642
Kid. Cortex	Control_CD_1	Control_CD	Alb	ALBU_MOUSE	P07724	21	40.5%	3.90268e-05	0.000222668	22.8004	1178670.2	33345594	7.30449e+06	7.30449e+06	1453700	2644.41	268.852
Kid. Cortex	Control_CD_2	Control_CD	Alb	ALBU_MOUSE	P07724	24	45.6%	3.90268e-05	0.000222668	23.5323	1858574.6	58943020	12132187	12132187	2.43649e+06	10390.8	1227.09
Kid. Cortex	Control_CD_3	Control_CD	Alb	ALBU_MOUSE	P07724	30	54.3%	3.90268e-05	0.000222668	24.0425		83331072	17278426	17278426	2.91978e+06	2555.31	10069.3
Kid. Cortex	Control_CD_4	Control_CD	Alb	ALBU_MOUSE	P07724	21	38.8%	3.90268e-05	0.000222668	22.6191	1039590.1	32516550	6.44208e+06	6.44208e+06	1.49702e+06	332.628	2631.62
Kid. Cortex	Control_CD_5	Control_CD	Alb	ALBU_MOUSE	P07724	22	42.8%	3.90268e-05	0.000222668	23.1513	1482993.5	40748484	9316058	9316058	1.79043e+06	2933.02	2464.35
Kid. Cortex	Proteinuric_AD_1	Proteinuric_AD	Alb	ALBU_MOUSE	P07724	44	69.7%	3.90268e-05	0.000222668	27.8037		1019618368	234278976	234278976	25462402	20353940	4380845
Kid. Cortex	Proteinuric_AD_2	Proteinuric_AD	Alb	ALBU_MOUSE	P07724	42	61%	3.90268e-05	0.000222668	27.6964		1035868800	217497888	217497888	22596972	11635045	5485780
Kid. Cortex	Proteinuric_AD_3	Proteinuric_AD	Alb	ALBU_MOUSE	P07724	45	71.2%	3.90268e-05	0.000222668	27.8151		1039033344	236145968	236145968	19474448	10250827	3.49595e+06
Kid. Cortex	Proteinuric_AD_4	Proteinuric_AD	Alb	ALBU_MOUSE	P07724	45	69.7%	3.90268e-05	0.000222668	27.4403		853692032	182115856	182115856	18130816	13031827	4.12388e+06
Kid. Cortex	Proteinuric_AD_5	Proteinuric_AD	Alb	ALBU_MOUSE	P07724	38	59.5%	3.90268e-05	0.000222668	27.4506		852512000	183427552	183427552	20505428	10726190	3.83359e+06
Kid. Cortex	Proteinuric_CD_1	Proteinuric_CD	Alb	ALBU_MOUSE	P07724	43	67.8%	3.90268e-05	0.000222668	26.8237		576401152	118778432	118778432	16423514	703.651	2142.84
Kid. Cortex	Proteinuric_CD_2	Proteinuric_CD	Alb	ALBU_MOUSE	P07724	45	69.2%	3.90268e-05	0.000222668	26.44	13943794.2	416246944	91042576	91042576	12506303	250.933	189.291
Kid. Cortex	Proteinuric_CD_3	Proteinuric_CD	Alb	ALBU_MOUSE	P07724	35	56.4%	3.90268e-05	0.000222668	25.6821	8263278.5	245574800	53835708	53835708	7.91377e+06	1984.38	429.616
Kid. Cortex	Proteinuric_CD_4	Proteinuric_CD	Alb	ALBU_MOUSE	P07724	39	60%	3.90268e-05	0.000222668	26.478	14772887.7	458661504	93470800	93470800	13787971	452.563	637.635

## Sheet: Duodenum
Organ	Sample	R.Condition	PG.Genes	PG.ProteinNames	PG.UniProtIds	PG.NrOfStrippedSequencesUsedForQuantification	PG.Coverage	PG.Pvalue	PG.Qvalue	PG.Log2Quantity	PG.IBAQ	PG.MS1Quantity	PG.MS2Quantity	PG.Quantity	PG.MS2Channel1	PG.MS2Channel2	PG.MS2Channel3
Duodenum	Control_AD_1	Control_AD	Alb	ALBU_MOUSE	P07724	28	51.8%	3.06794e-25	0	23.6451	1484077.4	63108132	13118548	13118548	4.10819e+06	766089	12291.6
Duodenum	Control_AD_2	Control_AD	Alb	ALBU_MOUSE	P07724	31	54.8%	3.06794e-25	0	24.7714	3636977	133452368	28637816	28637816	8051425	2.01048e+06	29768.9
Duodenum	Control_AD_3	Control_AD	Alb	ALBU_MOUSE	P07724	32	53.3%	3.06794e-25	0	25.1738	4319815.9	166099184	37849232	37849232	9628740	2.50617e+06	28211.3
Duodenum	Control_AD_4	Control_AD	Alb	ALBU_MOUSE	P07724	31	54.8%	3.06794e-25	0	25.0173	4636892	155255120	33960328	33960328	10107424	2.56193e+06	22552.3
Duodenum	Control_AD_5	Control_AD	Alb	ALBU_MOUSE	P07724	26	47%	3.06794e-25	0	24.9279	4614034.7	142294112	31918478	31918478	9677867	2.48962e+06	19718.3
Duodenum	Control_AD_6	Control_AD	Alb	ALBU_MOUSE	P07724	32	55.9%	3.06794e-25	0	25.237	4426606.1	170900704	39544752	39544752	10187618	2.51873e+06	28050.5
Duodenum	Control_CD_1	Control_CD	Alb	ALBU_MOUSE	P07724	28	47%	3.06794e-25	0	24.3473	2295480.7	101338048	21343082	21343082	9642797	146.84	404.52
Duodenum	Control_CD_2	Control_CD	Alb	ALBU_MOUSE	P07724	34	57.1%	3.06794e-25	0	25.4929	5282281.8	226887392	47218740	47218740	22492372	9375.2	1
Duodenum	Control_CD_3	Control_CD	Alb	ALBU_MOUSE	P07724	31	59.4%	3.06794e-25	0	25.3312	4858406.3	200140368	42213024	42213024	20898444	1	1
Duodenum	Control_CD_4	Control_CD	Alb	ALBU_MOUSE	P07724	31	58.2%	3.06794e-25	0	25.2683	4506483.7	203411280	40413188	40413188	21284668	1.00248	265.54
Duodenum	Control_CD_5	Control_CD	Alb	ALBU_MOUSE	P07724	33	55.9%	3.06794e-25	0	25.4779	5733698.5	231018576	46730156	46730156	26646506	115.237	60.5939
Duodenum	Control_CD_6	Control_CD	Alb	ALBU_MOUSE	P07724	32	54.8%	3.06794e-25	0	25.9334	6745422.4	277275264	64080596	64080596	29297900	1	265.227
Duodenum	Proteinuric_AD_1	Proteinuric_AD	Alb	ALBU_MOUSE	P07724	29	54.6%	3.06794e-25	0	25.2342	4682298	185618976	39467320	39467320	12032325	2.58279e+06	39866.8
Duodenum	Proteinuric_AD_2	Proteinuric_AD	Alb	ALBU_MOUSE	P07724	30	58.2%	3.06794e-25	0	24.3997	2532119.5	109645112	22133814	22133814	5739260	1.27306e+06	11038.7
Duodenum	Proteinuric_AD_3	Proteinuric_AD	Alb	ALBU_MOUSE	P07724	31	54.6%	3.06794e-25	0	25.7693	6967579.6	257985808	57191104	57191104	11745027	5206315	33755.3
Duodenum	Proteinuric_AD_4	Proteinuric_AD	Alb	ALBU_MOUSE	P07724	29	45.7%	3.06794e-25	0	24.6465	3088123.9	118603552	26261860	26261860	7042311	1.75468e+06	13443.7
Duodenum	Proteinuric_AD_5	Proteinuric_AD	Alb	ALBU_MOUSE	P07724	28	46.9%	3.06794e-25	0	24.0943	2039711.7	89953144	17910134	17910134	4.92661e+06	1.3632e+06	13203.2
Duodenum	Proteinuric_CD_1	Proteinuric_CD	Alb	ALBU_MOUSE	P07724	33	55.9%	3.06794e-25	0	24.5049	2287294.7	105175696	23806758	23806758	10526092	1	1
Duodenum	Proteinuric_CD_2	Proteinuric_CD	Alb	ALBU_MOUSE	P07724	29	45.7%	3.06794e-25	0	24.2639	2432008	96994632	20144358	20144358	9087136	1289.2	1
Duodenum	Proteinuric_CD_3	Proteinuric_CD	Alb	ALBU_MOUSE	P07724	33	59.5%	3.06794e-25	0	25.1419	4249316.2	165876848	37023036	37023036	16976628	1.00788	1.02356
Duodenum	Proteinuric_CD_4	Proteinuric_CD	Alb	ALBU_MOUSE	P07724	33	55.6%	3.06794e-25	0	24.6179	2840929.9	116255080	25747746	25747746	12283774	1.29689	1.29064

## Sheet: Erythrocytes
Organ	Sample	R.Condition	PG.Genes	PG.ProteinNames	PG.UniProtIds	PG.NrOfStrippedSequencesUsedForQuantification	PG.Coverage	PG.Pvalue	PG.Qvalue	PG.Log2Quantity	PG.IBAQ	PG.MS1Quantity	PG.MS2Quantity	PG.Quantity	PG.MS2Channel1	PG.MS2Channel2	PG.MS2Channel3
Erythrocytes	Control_AD_1	Control_AD	Alb	ALBU_MOUSE	P07724	46	58.7%	3.00728e-05	0	21.0923	366897.5	13243888	2235692	2235692	532869	224740	2379.65
Erythrocytes	Control_AD_2	Control_AD	Alb	ALBU_MOUSE	P07724	31	46.9%	3.00728e-05	0	19.0952	94297.5	3187538	560058	560058	184771	74519.1	320.062
Erythrocytes	Control_AD_3	Control_AD	Alb	ALBU_MOUSE	P07724	38	53.3%	3.00728e-05	0	21.4971	663189.8	17697386	2.95992e+06	2.95992e+06	1.94054e+06	545219	4178.51
Erythrocytes	Control_AD_4	Control_AD	Alb	ALBU_MOUSE	P07724	57	64.1%	3.00728e-05	0	24.3642		122404264	21595142	21595142	8811194	1.91016e+06	10744.8
Erythrocytes	Control_AD_5	Control_AD	Alb	ALBU_MOUSE	P07724	30	44.1%	3.00728e-05	0	19.8805	189145.7	6.05938e+06	965230	965230	575495	129993	829.981
Erythrocytes	Control_AD_6	Control_AD	Alb	ALBU_MOUSE	P07724	39	51.3%	3.00728e-05	0	20.7154	291865.6	11437732	1.72174e+06	1.72174e+06	550921	280012	1864.88
Erythrocytes	Control_CD_1	Control_CD	Alb	ALBU_MOUSE	P07724	34	49.2%	3.00728e-05	0	19.954	179018.7	6399660	1.01565e+06	1.01565e+06	399310	1	1
Erythrocytes	Control_CD_2	Control_CD	Alb	ALBU_MOUSE	P07724	41	56.7%	3.00728e-05	0	20.725	654706.8	11319907	1.73322e+06	1.73322e+06	5.46721e+06	1	1
Erythrocytes	Control_CD_3	Control_CD	Alb	ALBU_MOUSE	P07724	45	54.6%	3.00728e-05	0	22.0161	878047.3	24050648	4.24126e+06	4.24126e+06	4.47446e+06	1.02917	87.9749
Erythrocytes	Control_CD_4	Control_CD	Alb	ALBU_MOUSE	P07724	42	54.6%	3.00728e-05	0	21.6994	817725.5	18088718	3.40552e+06	3.40552e+06	4.30754e+06	3.43438	62.3288
Erythrocytes	Control_CD_5	Control_CD	Alb	ALBU_MOUSE	P07724	31	43.4%	3.00728e-05	0	20.1045	463084.2	7144064	1.12734e+06	1.12734e+06	1.42447e+06	1.18533	1.05761
Erythrocytes	Control_CD_6	Control_CD	Alb	ALBU_MOUSE	P07724	46	56.9%	3.00728e-05	0	22.0642	1028472.5	26671564	4385057	4385057	5181344	1	1
Erythrocytes	Proteinuric_AD_1	Proteinuric_AD	Alb	ALBU_MOUSE	P07724	26	41.3%	3.00728e-05	0	20.1923	244339.9	7913786	1.19806e+06	1.19806e+06	769079	154474	3.83568
Erythrocytes	Proteinuric_AD_2	Proteinuric_AD	Alb	ALBU_MOUSE	P07724	25	38.5%	3.00728e-05	0	21.3788	355162.7	13635768	2726817	2726817	575740	100402	5.0306
Erythrocytes	Proteinuric_AD_3	Proteinuric_AD	Alb	ALBU_MOUSE	P07724	35	52.1%	3.00728e-05	0	21.8282	712968.4	22668614	3.72353e+06	3.72353e+06	1.9252e+06	795356	4824.49
Erythrocytes	Proteinuric_AD_4	Proteinuric_AD	Alb	ALBU_MOUSE	P07724	44	54.4%	3.00728e-05	0	21.9234	629336.2	22458952	3.97755e+06	3.97755e+06	996566	473879	3222.94
Erythrocytes	Proteinuric_AD_5	Proteinuric_AD	Alb	ALBU_MOUSE	P07724	33	45.6%	3.00728e-05	0	19.9338	176347.9	5975567	1.00156e+06	1.00156e+06	272194	138548	971.313
Erythrocytes	Proteinuric_CD_1	Proteinuric_CD	Alb	ALBU_MOUSE	P07724	20	31.4%	3.00728e-05	0	19.168	118546.5	3.72128e+06	589018	589018	456456	180.027	1
Erythrocytes	Proteinuric_CD_2	Proteinuric_CD	Alb	ALBU_MOUSE	P07724	26	38.5%	3.00728e-05	0	18.8748	152752.6	3.11158e+06	480691	480691	908474	1.15572	1.46765
Erythrocytes	Proteinuric_CD_3	Proteinuric_CD	Alb	ALBU_MOUSE	P07724	30	40.5%	3.00728e-05	0	20.8948	722337.2	11718951	1.94968e+06	1.94968e+06	1.51263e+06	3.0925	1.27743
Erythrocytes	Proteinuric_CD_4	Proteinuric_CD	Alb	ALBU_MOUSE	P07724	24	33.4%	3.00728e-05	0	19.4815	208709.1	4.81448e+06	732029	732029	468071	3.04315	3.26706

## Sheet: Heart
Organ	Sample	R.Condition	PG.Genes	PG.ProteinNames	PG.UniProtIds	PG.NrOfStrippedSequencesUsedForQuantification	PG.Coverage	PG.Pvalue	PG.Qvalue	PG.Log2Quantity	PG.IBAQ	PG.MS1Quantity	PG.MS2Quantity	PG.Quantity	PG.MS2Channel1	PG.MS2Channel2	PG.MS2Channel3
Heart	Control_AD_1	Control_AD	Alb	ALBU_MOUSE	P07724	36	57.4%	2.19895e-06	0.000388651	22.0693	1202032.3	30944742	4.4007e+06	4.4007e+06	6041791	1.60353e+06	29491.7
Heart	Control_AD_2	Control_AD	Alb	ALBU_MOUSE	P07724	35	59%	2.19895e-06	0.000388651	22.1469	1410664.4	29155602	4.64396e+06	4.64396e+06	5.62929e+06	2.23257e+06	36457.2
Heart	Control_AD_3	Control_AD	Alb	ALBU_MOUSE	P07724	40	63.8%	2.19895e-06	0.000388651	23.0396	2025424	52594528	8622246	8622246	8871592	2.89283e+06	64893.7
Heart	Control_AD_4	Control_AD	Alb	ALBU_MOUSE	P07724	44	65.6%	2.19895e-06	0.000388651	23.3321	2469073	77562840	10559866	10559866	11007077	4.07774e+06	84338.1
Heart	Control_AD_5	Control_AD	Alb	ALBU_MOUSE	P07724	43	61.7%	2.19895e-06	0.000388651	23.3272	2429382.1	72964952	10524292	10524292	11462438	3432350	56468.2
Heart	Control_AD_6	Control_AD	Alb	ALBU_MOUSE	P07724	42	64.5%	2.19895e-06	0.000388651	23.1827	2322650.9	64523348	9521325	9521325	9660495	3.84417e+06	62969.9
Heart	Control_CD_1	Control_CD	Alb	ALBU_MOUSE	P07724	43	66.6%	2.19895e-06	0.000388651	23.3269	3047771.9	76274336	10521820	10521820	16938178	1.22076	1.22841
Heart	Control_CD_2	Control_CD	Alb	ALBU_MOUSE	P07724	44	64.5%	2.19895e-06	0.000388651	23.0461	2147046.8	52197756	8660795	8660795	11868276	54.6543	505.095
Heart	Control_CD_3	Control_CD	Alb	ALBU_MOUSE	P07724	45	64.6%	2.19895e-06	0.000388651	24.3547	4759006.7	134311440	21452792	21452792	26327890	2850.9	1.05716
Heart	Control_CD_4	Control_CD	Alb	ALBU_MOUSE	P07724	46	67.1%	2.19895e-06	0.000388651	23.7134	3412395.6	80477592	13754165	13754165	20005276	1.10576	290.77
Heart	Control_CD_5	Control_CD	Alb	ALBU_MOUSE	P07724	46	65.6%	2.19895e-06	0.000388651	24.728	6181436.8	183580896	27788490	27788490	36801456	1.17741	269.587
Heart	Control_CD_6	Control_CD	Alb	ALBU_MOUSE	P07724	44	64.5%	2.19895e-06	0.000388651	23.3621	3093868.4	69975440	10781554	10781554	20542288	1.06068	198.199
Heart	Proteinuric_AD_1	Proteinuric_AD	Alb	ALBU_MOUSE	P07724	37	61%	2.19895e-06	0.000388651	21.8585	1065530.2	26711626	3.80252e+06	3.80252e+06	3.78298e+06	995484	9627.06
Heart	Proteinuric_AD_2	Proteinuric_AD	Alb	ALBU_MOUSE	P07724	42	65.1%	2.19895e-06	0.000388651	22.9566	2842250.9	55947204	8.14006e+06	8.14006e+06	9762910	2385117	41936.4
Heart	Proteinuric_AD_3	Proteinuric_AD	Alb	ALBU_MOUSE	P07724	32	57.2%	2.19895e-06	0.000388651	21.5699	1334165.6	25320496	3.11315e+06	3.11315e+06	3296153	1.30998e+06	14565.6
Heart	Proteinuric_AD_4	Proteinuric_AD	Alb	ALBU_MOUSE	P07724	36	59.2%	2.19895e-06	0.000388651	22.0613	1015756.8	28337212	4.3764e+06	4.3764e+06	4.44537e+06	1.22302e+06	14267.1
Heart	Proteinuric_AD_5	Proteinuric_AD	Alb	ALBU_MOUSE	P07724	31	51.6%	2.19895e-06	0.000388651	21.3966	1261705.5	21477952	2.76079e+06	2.76079e+06	4.1413e+06	1.12469e+06	6895.71
Heart	Proteinuric_CD_1	Proteinuric_CD	Alb	ALBU_MOUSE	P07724	40	62%	2.19895e-06	0.000388651	22.5325	1562589.5	37280428	6066789	6066789	9746850	18757.4	1
Heart	Proteinuric_CD_2	Proteinuric_CD	Alb	ALBU_MOUSE	P07724	46	65.6%	2.19895e-06	0.000388651	23.3421	2834750	64817924	10633687	10633687	20393792	1	27.8154
Heart	Proteinuric_CD_3	Proteinuric_CD	Alb	ALBU_MOUSE	P07724	42	64.8%	2.19895e-06	0.000388651	22.8685	1971060	44050188	7.65776e+06	7.65776e+06	11698085	1	74.3364
Heart	Proteinuric_CD_4	Proteinuric_CD	Alb	ALBU_MOUSE	P07724	45	67.1%	2.19895e-06	0.000388651	23.5282	3186927.3	69548960	12097448	12097448	21027760	538.925	1106.37

## Sheet: Ileum
Organ	Sample	R.Condition	PG.Genes	PG.ProteinNames	PG.UniProtIds	PG.NrOfStrippedSequencesUsedForQuantification	PG.Coverage	PG.Pvalue	PG.Qvalue	PG.Log2Quantity	PG.IBAQ	PG.MS1Quantity	PG.MS2Quantity	PG.Quantity	PG.MS2Channel1	PG.MS2Channel2	PG.MS2Channel3
Ileum	Control_AD_1	Control_AD	Alb	ALBU_MOUSE	P07724	32	58.4%	3.48411e-08	0	25.1807	8053829.3	173503440	38031744	38031744	18629224	4.8791e+06	95236
Ileum	Control_AD_2	Control_AD	Alb	ALBU_MOUSE	P07724	25	45.4%	3.48411e-08	0	24.7012	5401624.4	124255688	27276428	27276428	18971124	3.93486e+06	117631
Ileum	Control_AD_3	Control_AD	Alb	ALBU_MOUSE	P07724	30	55.8%	3.48411e-08	0	24.4295	3718034.5	110213416	22594540	22594540	10696669	3.54767e+06	66149.2
Ileum	Control_AD_4	Control_AD	Alb	ALBU_MOUSE	P07724	30	56.7%	3.48411e-08	0	24.8236	3990358.7	114063024	29692052	29692052	11295532	3.35311e+06	52767.9
Ileum	Control_AD_5	Control_AD	Alb	ALBU_MOUSE	P07724	33	60.7%	3.48411e-08	0	25.9898	9083883.8	267906128	66638280	66638280	25769824	8117165	163624
Ileum	Control_AD_6	Control_AD	Alb	ALBU_MOUSE	P07724	31	57.4%	3.48411e-08	0	25.9556	7910636.5	275718304	65075576	65075576	29927708	8.17746e+06	145187
Ileum	Control_CD_1	Control_CD	Alb	ALBU_MOUSE	P07724	35	60.9%	3.48411e-08	0	25.3076	5882715.7	188795136	41527232	41527232	23477750	1	1
Ileum	Control_CD_2	Control_CD	Alb	ALBU_MOUSE	P07724	28	48.4%	3.48411e-08	0	24.8601	4004314.2	137079376	30453102	30453102	17918412	16604.7	1.0893
Ileum	Control_CD_3	Control_CD	Alb	ALBU_MOUSE	P07724	34	60.7%	3.48411e-08	0	25.3205	5617671.6	190657696	41902332	41902332	24040116	134.495	127.388
Ileum	Control_CD_4	Control_CD	Alb	ALBU_MOUSE	P07724	35	60.4%	3.48411e-08	0	25.8641	8091233.3	274204992	61075452	61075452	39119000	243.842	1
Ileum	Control_CD_5	Control_CD	Alb	ALBU_MOUSE	P07724	37	63.7%	3.48411e-08	0	26.5193	11914978	381277696	96182208	96182208	51819900	1	1
Ileum	Control_CD_6	Control_CD	Alb	ALBU_MOUSE	P07724	32	55.8%	3.48411e-08	0	25.9121	9479047.2	261690704	63142044	63142044	43223588	1	1
Ileum	Proteinuric_AD_1	Proteinuric_AD	Alb	ALBU_MOUSE	P07724	29	55.9%	3.48411e-08	0	24.6118	3875805.6	125890624	25637794	25637794	12721539	2.91789e+06	30910.8
Ileum	Proteinuric_AD_2	Proteinuric_AD	Alb	ALBU_MOUSE	P07724	26	50.5%	3.48411e-08	0	24.2815	3134243.7	100954544	20392054	20392054	8647554	1.8812e+06	49931.1
Ileum	Proteinuric_AD_3	Proteinuric_AD	Alb	ALBU_MOUSE	P07724	26	48.2%	3.48411e-08	0	23.8088	2420579.1	69153640	14694299	14694299	6135805	2.39184e+06	38342.5
Ileum	Proteinuric_AD_4	Proteinuric_AD	Alb	ALBU_MOUSE	P07724	25	46.9%	3.48411e-08	0	24.3446	2995640.3	86216288	21304162	21304162	7.98108e+06	2.4885e+06	31906.6
Ileum	Proteinuric_AD_5	Proteinuric_AD	Alb	ALBU_MOUSE	P07724	30	58.2%	3.48411e-08	0	24.8004	4707245.7	120165792	29219706	29219706	13572992	4.61765e+06	52950.8
Ileum	Proteinuric_CD_1	Proteinuric_CD	Alb	ALBU_MOUSE	P07724	34	61.2%	3.48411e-08	0	24.921	4289603.7	135447856	31765686	31765686	20888674	5482.14	1
Ileum	Proteinuric_CD_2	Proteinuric_CD	Alb	ALBU_MOUSE	P07724	34	59.7%	3.48411e-08	0	24.7386	3625615.6	129891264	27993624	27993624	16882090	1	338.262
Ileum	Proteinuric_CD_3	Proteinuric_CD	Alb	ALBU_MOUSE	P07724	29	48.4%	3.48411e-08	0	24.4397	3645643.1	102549272	22754624	22754624	18309170	1	1.01173
Ileum	Proteinuric_CD_4	Proteinuric_CD	Alb	ALBU_MOUSE	P07724	29	49%	3.48411e-08	0	23.1501	1355405.2	45893276	9308157	9308157	5.78693e+06	1	1

## Sheet: Jejunum
Organ	Sample	R.Condition	PG.Genes	PG.ProteinNames	PG.UniProtIds	PG.NrOfStrippedSequencesUsedForQuantification	PG.Coverage	PG.Pvalue	PG.Qvalue	PG.Log2Quantity	PG.IBAQ	PG.MS1Quantity	PG.MS2Quantity	PG.Quantity	PG.MS2Channel1	PG.MS2Channel2	PG.MS2Channel3
Jejunum	Control_AD_1	Control_AD	Alb	ALBU_MOUSE	P07724	24	46.7%	2.49298e-16	0	24.1817	2645434.6	96875152	19029220	19029220	8823769	2.04745e+06	90044.6
Jejunum	Control_AD_2	Control_AD	Alb	ALBU_MOUSE	P07724	29	50%	2.49298e-16	0	24.4573	3503550.7	131187872	23035244	23035244	10728874	2.74243e+06	201059
Jejunum	Control_AD_3	Control_AD	Alb	ALBU_MOUSE	P07724	33	63.3%	2.49298e-16	0	25.4626	6396612	246368160	46237252	46237252	17873620	5658517	293618
Jejunum	Control_AD_4	Control_AD	Alb	ALBU_MOUSE	P07724	32	61%	2.49298e-16	0	25.21	5401654.3	207045120	38811044	38811044	14188065	4.22332e+06	239939
Jejunum	Control_AD_5	Control_AD	Alb	ALBU_MOUSE	P07724	31	60%	2.49298e-16	0	25.6282	6881592.7	295892032	51864000	51864000	18487460	4.66272e+06	273372
Jejunum	Control_AD_6	Control_AD	Alb	ALBU_MOUSE	P07724	26	48.5%	2.49298e-16	0	24.2131	2417262	105126952	19447112	19447112	6564788	2068930	192909
Jejunum	Control_CD_1	Control_CD	Alb	ALBU_MOUSE	P07724	25	49.3%	2.49298e-16	0	24.1637	1911994.7	107861216	18793048	18793048	8488366	1422.8	43.784
Jejunum	Control_CD_2	Control_CD	Alb	ALBU_MOUSE	P07724	29	58.4%	2.49298e-16	0	24.1941	2374157.8	109378840	19193600	19193600	9583921	27389.1	1695.43
Jejunum	Control_CD_3	Control_CD	Alb	ALBU_MOUSE	P07724	32	59.4%	2.49298e-16	0	26.1589	7695936.9	421891552	74922784	74922784	30452212	6.66514	837.621
Jejunum	Control_CD_4	Control_CD	Alb	ALBU_MOUSE	P07724	28	56.2%	2.49298e-16	0	25.5095	6138532.2	284517440	47768092	47768092	27989458	1	1257.29
Jejunum	Control_CD_5	Control_CD	Alb	ALBU_MOUSE	P07724	28	51.6%	2.49298e-16	0	24.8133	3252516.6	170401360	29482032	29482032	15423973	1	1
Jejunum	Control_CD_6	Control_CD	Alb	ALBU_MOUSE	P07724	27	55.9%	2.49298e-16	0	25.0481	4755052.9	190578912	34691988	34691988	19641236	1	1
Jejunum	Proteinuric_AD_1	Proteinuric_AD	Alb	ALBU_MOUSE	P07724	30	55.3%	2.49298e-16	0	25.4647	6474819.2	257977280	46307300	46307300	17761430	3935618	237982
Jejunum	Proteinuric_AD_2	Proteinuric_AD	Alb	ALBU_MOUSE	P07724	21	42.1%	2.49298e-16	0	23.6213	2158475.3	82794760	12904216	12904216	5.69686e+06	1115538	55053.9
Jejunum	Proteinuric_AD_3	Proteinuric_AD	Alb	ALBU_MOUSE	P07724	24	43.6%	2.49298e-16	0	23.9772	2738598.1	107845832	16514721	16514721	5406711	2241322	122151
Jejunum	Proteinuric_AD_4	Proteinuric_AD	Alb	ALBU_MOUSE	P07724	27	55.9%	2.49298e-16	0	24.4454	2891250.1	125348872	22844870	22844870	7818223	1.77317e+06	108019
Jejunum	Proteinuric_AD_5	Proteinuric_AD	Alb	ALBU_MOUSE	P07724	21	41.9%	2.49298e-16	0	22.9382	1415893.3	45892840	8036987	8036987	2491544	828512	61836.2
Jejunum	Proteinuric_CD_1	Proteinuric_CD	Alb	ALBU_MOUSE	P07724	27	51.3%	2.49298e-16	0	23.8131	1609927.1	77211768	14738133	14738133	7769522	1010.1	421.475
Jejunum	Proteinuric_CD_2	Proteinuric_CD	Alb	ALBU_MOUSE	P07724	30	54.9%	2.49298e-16	0	23.5663	1361004.7	65386208	12421504	12421504	8.16066e+06	1	55.5072
Jejunum	Proteinuric_CD_3	Proteinuric_CD	Alb	ALBU_MOUSE	P07724	29	53%	2.49298e-16	0	24.888	3711383.9	174298400	31047796	31047796	17528752	2678.57	1519.01
Jejunum	Proteinuric_CD_4	Proteinuric_CD	Alb	ALBU_MOUSE	P07724	25	44.7%	2.49298e-16	0	22.5887	842476.5	36092008	6307937	6307937	3.4104e+06	1	1

## Sheet: Liver
Organ	Sample	R.Condition	PG.Genes	PG.ProteinNames	PG.UniProtIds	PG.NrOfStrippedSequencesUsedForQuantification	PG.Coverage	PG.Pvalue	PG.Qvalue	PG.Log2Quantity	PG.IBAQ	PG.MS1Quantity	PG.MS2Quantity	PG.Quantity	PG.MS2Channel1	PG.MS2Channel2	PG.MS2Channel3
Liver	Control_AD_1	Control_AD	Alb	ALBU_MOUSE	P07724	30	52.5%	9.6809e-23	0	23.4324	2009027.4	62331940	11320316	11320316	108817	31691.1	1605.13
Liver	Control_AD_2	Control_AD	Alb	ALBU_MOUSE	P07724	28	48%	9.6809e-23	0	22.4344	1006991.2	32755356	5.66812e+06	5.66812e+06	69551.7	19049	1425.52
Liver	Control_AD_3	Control_AD	Alb	ALBU_MOUSE	P07724	29	48.4%	9.6809e-23	0	22.3546	1058376.5	26276334	5.36299e+06	5.36299e+06	76003.2	28380.8	304.956
Liver	Control_AD_4	Control_AD	Alb	ALBU_MOUSE	P07724	33	56.4%	9.6809e-23	0	24.1124	3208783.1	104270032	18136984	18136984	225248	42049.9	3002.05
Liver	Control_AD_5	Control_AD	Alb	ALBU_MOUSE	P07724	32	52.5%	9.6809e-23	0	22.7179	1440076.7	35979936	6.89878e+06	6.89878e+06	64831.3	20524.9	196.995
Liver	Control_AD_6	Control_AD	Alb	ALBU_MOUSE	P07724	29	47.2%	9.6809e-23	0	23.0644	1555913.5	46809236	8771816	8771816	97213.3	19281.8	1.1657
Liver	Control_CD_1	Control_CD	Alb	ALBU_MOUSE	P07724	37	56.2%	9.6809e-23	0	23.4031	1467343.8	54785372	11092566	11092566	122081	109.365	1
Liver	Control_CD_2	Control_CD	Alb	ALBU_MOUSE	P07724	37	56.6%	9.6809e-23	0	23.605	1993638.7	66640976	12758793	12758793	140700	125.453	1
Liver	Control_CD_3	Control_CD	Alb	ALBU_MOUSE	P07724	35	54.8%	9.6809e-23	0	22.4775	865313	28792974	5.84004e+06	5.84004e+06	58511	179.309	8.58967
Liver	Control_CD_4	Control_CD	Alb	ALBU_MOUSE	P07724	37	56.2%	9.6809e-23	0	23.1726	1335115.5	47224888	9454862	9454862	90639	1	602.918
Liver	Control_CD_5	Control_CD	Alb	ALBU_MOUSE	P07724	33	59%	9.6809e-23	0	23.5922	1559961.6	69061488	12645866	12645866	122950	1	234.798
Liver	Control_CD_6	Control_CD	Alb	ALBU_MOUSE	P07724	37	60%	9.6809e-23	0	24.1566	2585434.9	112474336	18700308	18700308	234964	91.4623	1
Liver	Proteinuric_AD_1	Proteinuric_AD	Alb	ALBU_MOUSE	P07724	33	53.8%	9.6809e-23	0	23.917	3129726	90136912	15839736	15839736	211353	51997.5	720.355
Liver	Proteinuric_AD_2	Proteinuric_AD	Alb	ALBU_MOUSE	P07724	32	52%	9.6809e-23	0	22.7361	1178979.7	40244176	6.98652e+06	6.98652e+06	61470.3	12166.3	1
Liver	Proteinuric_AD_3	Proteinuric_AD	Alb	ALBU_MOUSE	P07724	32	51.8%	9.6809e-23	0	23.1855	2156431.9	52851264	9539935	9539935	104266	34544.2	2232.31
Liver	Proteinuric_AD_4	Proteinuric_AD	Alb	ALBU_MOUSE	P07724	28	48.5%	9.6809e-23	0	22.8901	1817683.1	45264808	7.77337e+06	7.77337e+06	76522.6	23862.1	798.8
Liver	Proteinuric_AD_5	Proteinuric_AD	Alb	ALBU_MOUSE	P07724	31	56.4%	9.6809e-23	0	24.0121	3685187.3	109356160	16918588	16918588	150709	59032.6	3049.71
Liver	Proteinuric_CD_1	Proteinuric_CD	Alb	ALBU_MOUSE	P07724	33	55.1%	9.6809e-23	0	23.6035	2153683.8	64881540	12745445	12745445	140815	1	1.7145
Liver	Proteinuric_CD_2	Proteinuric_CD	Alb	ALBU_MOUSE	P07724	34	53.6%	9.6809e-23	0	23.5327	1631475.1	56365232	12135032	12135032	138344	158.139	1
Liver	Proteinuric_CD_3	Proteinuric_CD	Alb	ALBU_MOUSE	P07724	33	53%	9.6809e-23	0	23.1346	1335876.9	42869880	9208828	9208828	123868	1	1
Liver	Proteinuric_CD_4	Proteinuric_CD	Alb	ALBU_MOUSE	P07724	40	64.1%	9.6809e-23	0	23.5703	1699867.5	57770324	12455611	12455611	125651	1	3109.53

[truncated: 6 more sheets: Lung, Kid. Medulla, Muscle, Plasma, Spleen, Urine]
