# Supplementary material for: Diversion of Arginine’s dietary metabolic fate in proteinuric kidney disease
Source: Research Square preprint supplement (doi:10.21203/rs.3.rs-9927381/v1), 2026-06-17
Supplement: Supplementary file 4 [file 0cf5403fd23ff741e0a304b2.xlsx]

## Sheet: All_Correlations
MouseID	Protein	n_pairs_used	Spearman_rho	Spearman_P-value
Control_1	Cps1	0
Control_2	Cps1	0
Proteinuric_1	Cps1	42	0.44575	0.00309189
Proteinuric_2	Cps1	39	0.72004	2.37935e-07
Control_1	Otc	0
Control_2	Otc	0
Proteinuric_1	Otc	0
Proteinuric_2	Otc	14	-0.204396	0.483346
Control_1	Ass1	87	-0.0872093	0.421859
Control_2	Ass1	95	-0.303527	0.00278854
Proteinuric_1	Ass1	61	-0.764992	7.11132e-13
Proteinuric_2	Ass1	57	-0.602087	7.25503e-07
Control_1	Asl	84	0.0892376	0.419532
Control_2	Asl	94	-0.156305	0.132472
Proteinuric_1	Asl	61	-0.654997	1.02257e-08
Proteinuric_2	Asl	57	-0.374514	0.00410299
Control_1	Arg1	66	0.0208955	0.867739
Control_2	Arg1	91	0.408425	5.84438e-05
Proteinuric_1	Arg1	50	0.109052	0.450933
Proteinuric_2	Arg1	41	0.43223	0.0047704
Control_1	Arg2	16	0.417647	0.107474
Control_2	Arg2	11	0.245455	0.466922
Proteinuric_1	Arg2	0
Proteinuric_2	Arg2	15	0.325	0.237225
Control_1	Agmat	0
Control_2	Agmat	0
Proteinuric_1	Agmat	58	0.592728	9.48163e-07
Proteinuric_2	Agmat	57	0.607532	5.40795e-07
Control_1	Srm	39	-0.0983806	0.551278
Control_2	Srm	26	0.106325	0.605186
Proteinuric_1	Srm	56	0.511962	5.50409e-05
Proteinuric_2	Srm	56	0.658715	3.41533e-08
Control_1	Sms	25	-0.0415385	0.843715
Control_2	Sms	0
Proteinuric_1	Sms	29	-0.203448	0.289814
Proteinuric_2	Sms	38	0.0845826	0.613636
Control_1	Aldh18a1	0
Control_2	Aldh18a1	0
Proteinuric_1	Aldh18a1	31	0.454435	0.0102222
Proteinuric_2	Aldh18a1	30	0.259177	0.16666
Control_1	Pycr2	19	-0.045614	0.852896
Control_2	Pycr2	0
Proteinuric_1	Pycr2	0
Proteinuric_2	Pycr2	0
Control_1	Pycr3	52	0.06258	0.659406
Control_2	Pycr3	45	-0.436232	0.00273883
Proteinuric_1	Pycr3	32	-0.00549853	0.976173
Proteinuric_2	Pycr3	36	0.139768	0.416209
Control_1	Oat	83	0.297007	0.0063982
Control_2	Oat	91	0.0104634	0.921585
Proteinuric_1	Oat	61	-0.410629	0.00101245
Proteinuric_2	Oat	56	-0.164867	0.224651
Control_1	Aldh4a1	87	-0.322337	0.00232847
Control_2	Aldh4a1	95	-0.279101	0.00616292
Proteinuric_1	Aldh4a1	61	-0.534003	9.33152e-06
Proteinuric_2	Aldh4a1	57	-0.478351	0.000167518
Control_1	Prodh	82	-0.00547447	0.961069
Control_2	Prodh	87	-0.00517606	0.96205
Proteinuric_1	Prodh	60	-0.697472	5.94265e-10
Proteinuric_2	Prodh	56	-0.407314	0.00183559
Control_1	Slc25a15	72	-0.091903	0.442605
Control_2	Slc25a15	71	0.024782	0.837461
Proteinuric_1	Slc25a15	40	-0.436961	0.00481431
Proteinuric_2	Slc25a15	45	0.00658762	0.965743
Control_1	Slc25a12	82	0.121821	0.275597
Control_2	Slc25a12	89	0.181631	0.0884783
Proteinuric_1	Slc25a12	61	-0.520412	1.71527e-05
Proteinuric_2	Slc25a12	56	-0.425632	0.00107415
Control_1	Slc25a13	87	0.228658	0.0331518
Control_2	Slc25a13	95	0.134882	0.192496
Proteinuric_1	Slc25a13	61	-0.670439	3.40874e-09
Proteinuric_2	Slc25a13	57	-0.75538	1.1215e-11
Control_1	Mdh1	86	0.299344	0.00511196
Control_2	Mdh1	95	0.153779	0.136783
Proteinuric_1	Mdh1	61	-0.335801	0.00815126
Proteinuric_2	Mdh1	57	-0.166062	0.216996
Control_1	Mdh2	87	0.214825	0.0456989
Control_2	Mdh2	95	-0.00202968	0.984426
Proteinuric_1	Mdh2	61	-0.192702	0.136777
Proteinuric_2	Mdh2	57	-0.154265	0.2519
Control_1	Fh	86	0.194604	0.0725775
Control_2	Fh	95	-0.0360162	0.728961
Proteinuric_1	Fh	61	-0.610153	1.78605e-07
Proteinuric_2	Fh	57	-0.623606	2.1978e-07
Control_1	Got1	83	-0.17875	0.105912
Control_2	Got1	93	0.157277	0.132171
Proteinuric_1	Got1	61	-0.26716	0.0373956
Proteinuric_2	Got1	57	-0.476666	0.000177953
Control_1	Got2	87	-0.102118	0.346613
Control_2	Got2	95	-0.0012318	0.990548
Proteinuric_1	Got2	61	-0.0228979	0.860953
Proteinuric_2	Got2	57	-0.31553	0.0168094
Control_1	Glud1	87	0.111267	0.304887
Control_2	Glud1	95	-0.309854	0.00224547
Proteinuric_1	Glud1	61	-0.192967	0.136229
Proteinuric_2	Glud1	57	-0.183951	0.170764
Control_1	Me1	82	0.179591	0.106429
Control_2	Me1	93	0.276954	0.0071987
Proteinuric_1	Me1	60	-0.404446	0.00135038
Proteinuric_2	Me1	56	-0.225496	0.0947231
Control_1	Me2	23	-0.163043	0.457288
Control_2	Me2	0
Proteinuric_1	Me2	0
Proteinuric_2	Me2	13	0.263736	0.383937
Control_1	Slc25a22	73	0.33648	0.00360675
Control_2	Slc25a22	65	0.0996503	0.429652
Proteinuric_1	Slc25a22	55	0.488817	0.000152698
Proteinuric_2	Slc25a22	54	0.49777	0.000128263
Control_1	Slc7a9	60	0.0640734	0.626705
Control_2	Slc7a9	35	-0.029972	0.86429
Proteinuric_1	Slc7a9	0
Proteinuric_2	Slc7a9	0

## Sheet: Pairs_values
MouseID	Protein_X	Protein_Y	Pair	Samples	Alb_raw	Aldh18a1_raw	Alb_log2	Aldh18a1_log2	Cps1_raw	Cps1_log2	Prodh_raw	Prodh_log2
Proteinuric_1	Alb	Aldh18a1	Alb_vs_Aldh18a1	F:\Yifan\20230908_singletubule_raw\230812_st_92_1.raw	8494020	8877.06	23.018	13.1159
Proteinuric_1	Alb	Aldh18a1	Alb_vs_Aldh18a1	F:\Yifan\20230908_singletubule_raw\230812_st_92_14.raw	9525810	18572.2	23.1834	14.1809
Proteinuric_1	Alb	Aldh18a1	Alb_vs_Aldh18a1	F:\Yifan\20230908_singletubule_raw\230812_st_92_16.raw	10422900	18018.3	23.3133	14.1372
Proteinuric_1	Alb	Aldh18a1	Alb_vs_Aldh18a1	F:\Yifan\20230908_singletubule_raw\230812_st_92_18.raw	8846260	12552.2	23.0766	13.6157
Proteinuric_1	Alb	Aldh18a1	Alb_vs_Aldh18a1	F:\Yifan\20230908_singletubule_raw\230812_st_92_21.raw	6532460	17623.1	22.6392	14.1052
Proteinuric_1	Alb	Aldh18a1	Alb_vs_Aldh18a1	F:\Yifan\20230908_singletubule_raw\230812_st_92_23.raw	5959190	16321.6	22.5067	13.9945
Proteinuric_1	Alb	Aldh18a1	Alb_vs_Aldh18a1	F:\Yifan\20230908_singletubule_raw\230812_st_92_24.raw	5353160	17065.2	22.352	14.0588
Proteinuric_1	Alb	Aldh18a1	Alb_vs_Aldh18a1	F:\Yifan\20230908_singletubule_raw\230812_st_92_27.raw	5386190	15054.2	22.3608	13.8779
Proteinuric_1	Alb	Aldh18a1	Alb_vs_Aldh18a1	F:\Yifan\20230908_singletubule_raw\230812_st_92_3.raw	16464800	15017.2	23.9729	13.8743
Proteinuric_1	Alb	Aldh18a1	Alb_vs_Aldh18a1	F:\Yifan\20230908_singletubule_raw\230812_st_92_32.raw	6907510	15352.8	22.7197	13.9062
Proteinuric_1	Alb	Aldh18a1	Alb_vs_Aldh18a1	F:\Yifan\20230908_singletubule_raw\230812_st_92_4.raw	3810130	5829.1	21.8614	12.5091
Proteinuric_1	Alb	Aldh18a1	Alb_vs_Aldh18a1	F:\Yifan\20230908_singletubule_raw\230812_st_92_41.raw	12467600	17232.1	23.5717	14.0728
Proteinuric_1	Alb	Aldh18a1	Alb_vs_Aldh18a1	F:\Yifan\20230908_singletubule_raw\230812_st_92_42.raw	11025900	45641.5	23.3944	15.4781
Proteinuric_1	Alb	Aldh18a1	Alb_vs_Aldh18a1	F:\Yifan\20230908_singletubule_raw\230812_st_92_45.raw	12714800	13019.1	23.6	13.6683
Proteinuric_1	Alb	Aldh18a1	Alb_vs_Aldh18a1	F:\Yifan\20230908_singletubule_raw\230812_st_92_49.raw	7595230	13585.9	22.8567	13.7298
Proteinuric_1	Alb	Aldh18a1	Alb_vs_Aldh18a1	F:\Yifan\20230908_singletubule_raw\230812_st_92_51.raw	10588900	23716.9	23.336	14.5336
Proteinuric_1	Alb	Aldh18a1	Alb_vs_Aldh18a1	F:\Yifan\20230908_singletubule_raw\230812_st_92_52.raw	8072390	18747.7	22.9446	14.1944
Proteinuric_1	Alb	Aldh18a1	Alb_vs_Aldh18a1	F:\Yifan\20230908_singletubule_raw\230812_st_92_59.raw	6255760	13232	22.5768	13.6917
Proteinuric_1	Alb	Aldh18a1	Alb_vs_Aldh18a1	F:\Yifan\20230908_singletubule_raw\230812_st_92_64.raw	7356060	22791.7	22.8105	14.4762
Proteinuric_1	Alb	Aldh18a1	Alb_vs_Aldh18a1	F:\Yifan\20230908_singletubule_raw\230812_st_92_66.raw	13909800	21389.8	23.7296	14.3846
Proteinuric_1	Alb	Aldh18a1	Alb_vs_Aldh18a1	F:\Yifan\20230908_singletubule_raw\230812_st_92_67.raw	9870620	15733.3	23.2347	13.9415
Proteinuric_1	Alb	Aldh18a1	Alb_vs_Aldh18a1	F:\Yifan\20230908_singletubule_raw\230812_st_92_68.raw	12417500	29068.1	23.5659	14.8271
Proteinuric_1	Alb	Aldh18a1	Alb_vs_Aldh18a1	F:\Yifan\20230908_singletubule_raw\230812_st_92_69.raw	5940510	18810.1	22.5022	14.1992
Proteinuric_1	Alb	Aldh18a1	Alb_vs_Aldh18a1	F:\Yifan\20230908_singletubule_raw\230812_st_92_73.raw	5204270	10787.6	22.3113	13.3971
Proteinuric_1	Alb	Aldh18a1	Alb_vs_Aldh18a1	F:\Yifan\20230908_singletubule_raw\230812_st_92_75.raw	6148510	22429.6	22.5518	14.4531
Proteinuric_1	Alb	Aldh18a1	Alb_vs_Aldh18a1	F:\Yifan\20230908_singletubule_raw\230812_st_92_78.raw	12555300	20004.4	23.5818	14.288
Proteinuric_1	Alb	Aldh18a1	Alb_vs_Aldh18a1	F:\Yifan\20230908_singletubule_raw\230812_st_92_8.raw	6783730	15473.1	22.6936	13.9175
Proteinuric_1	Alb	Aldh18a1	Alb_vs_Aldh18a1	F:\Yifan\20230908_singletubule_raw\230812_st_92_88.raw	5478730	7757.16	22.3854	12.9213
Proteinuric_1	Alb	Aldh18a1	Alb_vs_Aldh18a1	F:\Yifan\20230908_singletubule_raw\230812_st_92_90.raw	6315530	15220.2	22.5905	13.8937
Proteinuric_1	Alb	Aldh18a1	Alb_vs_Aldh18a1	F:\Yifan\20230908_singletubule_raw\230812_st_92_91.raw	4461430	7037.78	22.0891	12.7809
Proteinuric_1	Alb	Aldh18a1	Alb_vs_Aldh18a1	F:\Yifan\20230908_singletubule_raw\230812_st_92_92.raw	6266870	9318.75	22.5793	13.1859
Proteinuric_1	Alb	Cps1	Alb_vs_Cps1	F:\Yifan\20230908_singletubule_raw\230812_st_92_1.raw	8494020		23.018		58167.1	15.8279
Proteinuric_1	Alb	Cps1	Alb_vs_Cps1	F:\Yifan\20230908_singletubule_raw\230812_st_92_10.raw	8417620		23.005		38794.8	15.2436
Proteinuric_1	Alb	Cps1	Alb_vs_Cps1	F:\Yifan\20230908_singletubule_raw\230812_st_92_11.raw	15738600		23.9078		61663	15.9121
Proteinuric_1	Alb	Cps1	Alb_vs_Cps1	F:\Yifan\20230908_singletubule_raw\230812_st_92_13.raw	11985300		23.5148		148284	17.178
Proteinuric_1	Alb	Cps1	Alb_vs_Cps1	F:\Yifan\20230908_singletubule_raw\230812_st_92_14.raw	9525810		23.1834		56917.2	15.7966
Proteinuric_1	Alb	Cps1	Alb_vs_Cps1	F:\Yifan\20230908_singletubule_raw\230812_st_92_16.raw	10422900		23.3133		60689.4	15.8892
Proteinuric_1	Alb	Cps1	Alb_vs_Cps1	F:\Yifan\20230908_singletubule_raw\230812_st_92_21.raw	6532460		22.6392		90216.8	16.4611
Proteinuric_1	Alb	Cps1	Alb_vs_Cps1	F:\Yifan\20230908_singletubule_raw\230812_st_92_23.raw	5959190		22.5067		38171.8	15.2202
Proteinuric_1	Alb	Cps1	Alb_vs_Cps1	F:\Yifan\20230908_singletubule_raw\230812_st_92_24.raw	5353160		22.352		42702.3	15.382
Proteinuric_1	Alb	Cps1	Alb_vs_Cps1	F:\Yifan\20230908_singletubule_raw\230812_st_92_3.raw	16464800		23.9729		69095.9	16.0763
Proteinuric_1	Alb	Cps1	Alb_vs_Cps1	F:\Yifan\20230908_singletubule_raw\230812_st_92_32.raw	6907510		22.7197		43895.2	15.4218
Proteinuric_1	Alb	Cps1	Alb_vs_Cps1	F:\Yifan\20230908_singletubule_raw\230812_st_92_34.raw	9301430		23.149		67970.9	16.0526
Proteinuric_1	Alb	Cps1	Alb_vs_Cps1	F:\Yifan\20230908_singletubule_raw\230812_st_92_41.raw	12467600		23.5717		71451.1	16.1247
Proteinuric_1	Alb	Cps1	Alb_vs_Cps1	F:\Yifan\20230908_singletubule_raw\230812_st_92_45.raw	12714800		23.6		75911.7	16.212
Proteinuric_1	Alb	Cps1	Alb_vs_Cps1	F:\Yifan\20230908_singletubule_raw\230812_st_92_46.raw	9445510		23.1712		53484.3	15.7068
Proteinuric_1	Alb	Cps1	Alb_vs_Cps1	F:\Yifan\20230908_singletubule_raw\230812_st_92_49.raw	7595230		22.8567		65455.2	15.9982
Proteinuric_1	Alb	Cps1	Alb_vs_Cps1	F:\Yifan\20230908_singletubule_raw\230812_st_92_51.raw	10588900		23.336		45568.6	15.4758
Proteinuric_1	Alb	Cps1	Alb_vs_Cps1	F:\Yifan\20230908_singletubule_raw\230812_st_92_52.raw	8072390		22.9446		59115.2	15.8512
Proteinuric_1	Alb	Cps1	Alb_vs_Cps1	F:\Yifan\20230908_singletubule_raw\230812_st_92_59.raw	6255760		22.5768		31963.3	14.9641
Proteinuric_1	Alb	Cps1	Alb_vs_Cps1	F:\Yifan\20230908_singletubule_raw\230812_st_92_60.raw	10202600		23.2824		228626	17.8026
Proteinuric_1	Alb	Cps1	Alb_vs_Cps1	F:\Yifan\20230908_singletubule_raw\230812_st_92_61.raw	8827610		23.0736		53765.7	15.7144
Proteinuric_1	Alb	Cps1	Alb_vs_Cps1	F:\Yifan\20230908_singletubule_raw\230812_st_92_62.raw	3625810		21.7899		23224.5	14.5034
Proteinuric_1	Alb	Cps1	Alb_vs_Cps1	F:\Yifan\20230908_singletubule_raw\230812_st_92_66.raw	13909800		23.7296		75764.1	16.2092
Proteinuric_1	Alb	Cps1	Alb_vs_Cps1	F:\Yifan\20230908_singletubule_raw\230812_st_92_67.raw	9870620		23.2347		42736.1	15.3832
Proteinuric_1	Alb	Cps1	Alb_vs_Cps1	F:\Yifan\20230908_singletubule_raw\230812_st_92_68.raw	12417500		23.5659		103593	16.6606
Proteinuric_1	Alb	Cps1	Alb_vs_Cps1	F:\Yifan\20230908_singletubule_raw\230812_st_92_69.raw	5940510		22.5022		131960	17.0097
Proteinuric_1	Alb	Cps1	Alb_vs_Cps1	F:\Yifan\20230908_singletubule_raw\230812_st_92_70.raw	6540260		22.6409		62892.9	15.9406
Proteinuric_1	Alb	Cps1	Alb_vs_Cps1	F:\Yifan\20230908_singletubule_raw\230812_st_92_71.raw	6564450		22.6462		47511.8	15.536
Proteinuric_1	Alb	Cps1	Alb_vs_Cps1	F:\Yifan\20230908_singletubule_raw\230812_st_92_73.raw	5204270		22.3113		32568.8	14.9912
Proteinuric_1	Alb	Cps1	Alb_vs_Cps1	F:\Yifan\20230908_singletubule_raw\230812_st_92_74.raw	17816500		24.0867		45404.8	15.4706
Proteinuric_1	Alb	Cps1	Alb_vs_Cps1	F:\Yifan\20230908_singletubule_raw\230812_st_92_75.raw	6148510		22.5518		47206.9	15.5267
Proteinuric_1	Alb	Cps1	Alb_vs_Cps1	F:\Yifan\20230908_singletubule_raw\230812_st_92_8.raw	6783730		22.6936		75028.7	16.1952
Proteinuric_1	Alb	Cps1	Alb_vs_Cps1	F:\Yifan\20230908_singletubule_raw\230812_st_92_86.raw	9039190		23.1078		98017.2	16.5807
Proteinuric_1	Alb	Cps1	Alb_vs_Cps1	F:\Yifan\20230908_singletubule_raw\230812_st_92_88.raw	5478730		22.3854		52260.9	15.6734
Proteinuric_1	Alb	Cps1	Alb_vs_Cps1	F:\Yifan\20230908_singletubule_raw\230812_st_92_9.raw	6572930		22.6481		44043.2	15.4266
Proteinuric_1	Alb	Cps1	Alb_vs_Cps1	F:\Yifan\20230908_singletubule_raw\230812_st_92_90.raw	6315530		22.5905		39164.9	15.2573
Proteinuric_1	Alb	Cps1	Alb_vs_Cps1	F:\Yifan\20230908_singletubule_raw\230812_st_92_91.raw	4461430		22.0891		128122	16.9672
Proteinuric_1	Alb	Cps1	Alb_vs_Cps1	F:\Yifan\20230908_singletubule_raw\230812_st_92_92.raw	6266870		22.5793		44035.2	15.4264
Proteinuric_1	Alb	Cps1	Alb_vs_Cps1	F:\Yifan\20230908_singletubule_raw\230815_st_92_30.raw	5476710		22.3849		32495.1	14.9879
Proteinuric_1	Alb	Cps1	Alb_vs_Cps1	F:\Yifan\20230908_singletubule_raw\230815_st_92_31.raw	5159610		22.2988		77029.2	16.2331
Proteinuric_1	Alb	Cps1	Alb_vs_Cps1	F:\Yifan\20230908_singletubule_raw\230815_st_92_38.raw	5426990		22.3717		24988.3	14.609
Proteinuric_1	Alb	Cps1	Alb_vs_Cps1	F:\Yifan\20230908_singletubule_raw\230815_st_92_48.raw	3116230		21.5714		23321.7	14.5094
Proteinuric_1	Alb	Prodh	Alb_vs_Prodh	F:\Yifan\20230908_singletubule_raw\230812_st_92_1.raw	8494020		23.018				214646	17.7116
Proteinuric_1	Alb	Prodh	Alb_vs_Prodh	F:\Yifan\20230908_singletubule_raw\230812_st_92_10.raw	8417620		23.005				140927	17.1046
Proteinuric_1	Alb	Prodh	Alb_vs_Prodh	F:\Yifan\20230908_singletubule_raw\230812_st_92_11.raw	15738600		23.9078				57122.1	15.8018
Proteinuric_1	Alb	Prodh	Alb_vs_Prodh	F:\Yifan\20230908_singletubule_raw\230812_st_92_13.raw	11985300		23.5148				63233.8	15.9484
Proteinuric_1	Alb	Prodh	Alb_vs_Prodh	F:\Yifan\20230908_singletubule_raw\230812_st_92_14.raw	9525810		23.1834				205268	17.6471
Proteinuric_1	Alb	Prodh	Alb_vs_Prodh	F:\Yifan\20230908_singletubule_raw\230812_st_92_16.raw	10422900		23.3133				221301	17.7557
Proteinuric_1	Alb	Prodh	Alb_vs_Prodh	F:\Yifan\20230908_singletubule_raw\230812_st_92_18.raw	8846260		23.0766				240024	17.8728
Proteinuric_1	Alb	Prodh	Alb_vs_Prodh	F:\Yifan\20230908_singletubule_raw\230812_st_92_21.raw	6532460		22.6392				105909	16.6925
Proteinuric_1	Alb	Prodh	Alb_vs_Prodh	F:\Yifan\20230908_singletubule_raw\230812_st_92_22.raw	2961320		21.4978				165088	17.3329
Proteinuric_1	Alb	Prodh	Alb_vs_Prodh	F:\Yifan\20230908_singletubule_raw\230812_st_92_23.raw	5959190		22.5067				252029	17.9432
Proteinuric_1	Alb	Prodh	Alb_vs_Prodh	F:\Yifan\20230908_singletubule_raw\230812_st_92_24.raw	5353160		22.352				253315	17.9506
Proteinuric_1	Alb	Prodh	Alb_vs_Prodh	F:\Yifan\20230908_singletubule_raw\230812_st_92_27.raw	5386190		22.3608				291591	18.1536
Proteinuric_1	Alb	Prodh	Alb_vs_Prodh	F:\Yifan\20230908_singletubule_raw\230812_st_92_3.raw	16464800		23.9729				43042.7	15.3935
Proteinuric_1	Alb	Prodh	Alb_vs_Prodh	F:\Yifan\20230908_singletubule_raw\230812_st_92_32.raw	6907510		22.7197				266603	18.0243
Proteinuric_1	Alb	Prodh	Alb_vs_Prodh	F:\Yifan\20230908_singletubule_raw\230812_st_92_34.raw	9301430		23.149				168298	17.3607
Proteinuric_1	Alb	Prodh	Alb_vs_Prodh	F:\Yifan\20230908_singletubule_raw\230812_st_92_4.raw	3810130		21.8614				348520	18.4109
Proteinuric_1	Alb	Prodh	Alb_vs_Prodh	F:\Yifan\20230908_singletubule_raw\230812_st_92_41.raw	12467600		23.5717				153428	17.2272
Proteinuric_1	Alb	Prodh	Alb_vs_Prodh	F:\Yifan\20230908_singletubule_raw\230812_st_92_42.raw	11025900		23.3944				109012	16.7341
Proteinuric_1	Alb	Prodh	Alb_vs_Prodh	F:\Yifan\20230908_singletubule_raw\230812_st_92_45.raw	12714800		23.6				148368	17.1788
Proteinuric_1	Alb	Prodh	Alb_vs_Prodh	F:\Yifan\20230908_singletubule_raw\230812_st_92_46.raw	9445510		23.1712				182948	17.4811
Proteinuric_1	Alb	Prodh	Alb_vs_Prodh	F:\Yifan\20230908_singletubule_raw\230812_st_92_49.raw	7595230		22.8567				174050	17.4091
Proteinuric_1	Alb	Prodh	Alb_vs_Prodh	F:\Yifan\20230908_singletubule_raw\230812_st_92_51.raw	10588900		23.336				213052	17.7008
Proteinuric_1	Alb	Prodh	Alb_vs_Prodh	F:\Yifan\20230908_singletubule_raw\230812_st_92_52.raw	8072390		22.9446				86598.9	16.4021
Proteinuric_1	Alb	Prodh	Alb_vs_Prodh	F:\Yifan\20230908_singletubule_raw\230812_st_92_59.raw	6255760		22.5768				311837	18.2504
Proteinuric_1	Alb	Prodh	Alb_vs_Prodh	F:\Yifan\20230908_singletubule_raw\230812_st_92_60.raw	10202600		23.2824				152129	17.2149
Proteinuric_1	Alb	Prodh	Alb_vs_Prodh	F:\Yifan\20230908_singletubule_raw\230812_st_92_61.raw	8827610		23.0736				208857	17.6722
Proteinuric_1	Alb	Prodh	Alb_vs_Prodh	F:\Yifan\20230908_singletubule_raw\230812_st_92_62.raw	3625810		21.7899				269964	18.0424
Proteinuric_1	Alb	Prodh	Alb_vs_Prodh	F:\Yifan\20230908_singletubule_raw\230812_st_92_64.raw	7356060		22.8105				245827	17.9073
Proteinuric_1	Alb	Prodh	Alb_vs_Prodh	F:\Yifan\20230908_singletubule_raw\230812_st_92_66.raw	13909800		23.7296				192144	17.5518
Proteinuric_1	Alb	Prodh	Alb_vs_Prodh	F:\Yifan\20230908_singletubule_raw\230812_st_92_67.raw	9870620		23.2347				117929	16.8476
Proteinuric_1	Alb	Prodh	Alb_vs_Prodh	F:\Yifan\20230908_singletubule_raw\230812_st_92_68.raw	12417500		23.5659				85318.5	16.3806
Proteinuric_1	Alb	Prodh	Alb_vs_Prodh	F:\Yifan\20230908_singletubule_raw\230812_st_92_69.raw	5940510		22.5022				162738	17.3122
Proteinuric_1	Alb	Prodh	Alb_vs_Prodh	F:\Yifan\20230908_singletubule_raw\230812_st_92_70.raw	6540260		22.6409				188186	17.5218
Proteinuric_1	Alb	Prodh	Alb_vs_Prodh	F:\Yifan\20230908_singletubule_raw\230812_st_92_71.raw	6564450		22.6462				220596	17.751
Proteinuric_1	Alb	Prodh	Alb_vs_Prodh	F:\Yifan\20230908_singletubule_raw\230812_st_92_73.raw	5204270		22.3113				320746	18.2911
Proteinuric_1	Alb	Prodh	Alb_vs_Prodh	F:\Yifan\20230908_singletubule_raw\230812_st_92_74.raw	17816500		24.0867				49066.6	15.5825
Proteinuric_1	Alb	Prodh	Alb_vs_Prodh	F:\Yifan\20230908_singletubule_raw\230812_st_92_75.raw	6148510		22.5518				336920	18.362
Proteinuric_1	Alb	Prodh	Alb_vs_Prodh	F:\Yifan\20230908_singletubule_raw\230812_st_92_78.raw	12555300		23.5818				15105.2	13.8828
Proteinuric_1	Alb	Prodh	Alb_vs_Prodh	F:\Yifan\20230908_singletubule_raw\230812_st_92_8.raw	6783730		22.6936				234030	17.8363
Proteinuric_1	Alb	Prodh	Alb_vs_Prodh	F:\Yifan\20230908_singletubule_raw\230812_st_92_86.raw	9039190		23.1078				142935	17.125
Proteinuric_1	Alb	Prodh	Alb_vs_Prodh	F:\Yifan\20230908_singletubule_raw\230812_st_92_88.raw	5478730		22.3854				222578	17.764
Proteinuric_1	Alb	Prodh	Alb_vs_Prodh	F:\Yifan\20230908_singletubule_raw\230812_st_92_9.raw	6572930		22.6481				300235	18.1957
Proteinuric_1	Alb	Prodh	Alb_vs_Prodh	F:\Yifan\20230908_singletubule_raw\230812_st_92_90.raw	6315530		22.5905				98152.8	16.5827
Proteinuric_1	Alb	Prodh	Alb_vs_Prodh	F:\Yifan\20230908_singletubule_raw\230812_st_92_91.raw	4461430		22.0891				191901	17.55
Proteinuric_1	Alb	Prodh	Alb_vs_Prodh	F:\Yifan\20230908_singletubule_raw\230812_st_92_92.raw	6266870		22.5793				367690	18.4881
Proteinuric_1	Alb	Prodh	Alb_vs_Prodh	F:\Yifan\20230908_singletubule_raw\230812_st_92_93.raw	5324140		22.3441				148558	17.1807
Proteinuric_1	Alb	Prodh	Alb_vs_Prodh	F:\Yifan\20230908_singletubule_raw\230815_st_92_19.raw	5228910		22.3181				345336	18.3976
Proteinuric_1	Alb	Prodh	Alb_vs_Prodh	F:\Yifan\20230908_singletubule_raw\230815_st_92_30.raw	5476710		22.3849				184729	17.4951
Proteinuric_1	Alb	Prodh	Alb_vs_Prodh	F:\Yifan\20230908_singletubule_raw\230815_st_92_31.raw	5159610		22.2988				306222	18.2242
Proteinuric_1	Alb	Prodh	Alb_vs_Prodh	F:\Yifan\20230908_singletubule_raw\230815_st_92_38.raw	5426990		22.3717				300854	18.1987
Proteinuric_1	Alb	Prodh	Alb_vs_Prodh	F:\Yifan\20230908_singletubule_raw\230815_st_92_40.raw	3053200		21.5419				350754	18.4201
Proteinuric_1	Alb	Prodh	Alb_vs_Prodh	F:\Yifan\20230908_singletubule_raw\230815_st_92_48.raw	3116230		21.5714				214585	17.7112
Proteinuric_1	Alb	Prodh	Alb_vs_Prodh	F:\Yifan\20230908_singletubule_raw\230815_st_92_53.raw	4247810		22.0183				278640	18.088
Proteinuric_1	Alb	Prodh	Alb_vs_Prodh	F:\Yifan\20230908_singletubule_raw\230815_st_92_54.raw	3955120		21.9153				266944	18.0262
Proteinuric_1	Alb	Prodh	Alb_vs_Prodh	F:\Yifan\20230908_singletubule_raw\230815_st_92_72.raw	3807590		21.8604				282732	18.1091
Proteinuric_1	Alb	Prodh	Alb_vs_Prodh	F:\Yifan\20230908_singletubule_raw\230815_st_92_77.raw	7756230		22.8869				154374	17.2361
Proteinuric_1	Alb	Prodh	Alb_vs_Prodh	F:\Yifan\20230908_singletubule_raw\230815_st_92_81.raw	1593760		20.604				363272	18.4707
Proteinuric_1	Alb	Prodh	Alb_vs_Prodh	F:\Yifan\20230908_singletubule_raw\230815_st_92_84.raw	2678190		21.3528				353073	18.4296
Proteinuric_1	Alb	Prodh	Alb_vs_Prodh	F:\Yifan\20230908_singletubule_raw\230815_st_92_87.raw	2858590		21.4469				220159	17.7482
Proteinuric_1	Alb	Prodh	Alb_vs_Prodh	F:\Yifan\20230908_singletubule_raw\230815_st_92_96.raw	2474540		21.2387				437143	18.7377
Proteinuric_2	Alb	Aldh18a1	Alb_vs_Aldh18a1	F:\Yifan\20230908_singletubule_raw\230812_st_88_11.raw	2791860	12444.6	21.4128	13.6032
Proteinuric_2	Alb	Aldh18a1	Alb_vs_Aldh18a1	F:\Yifan\20230908_singletubule_raw\230812_st_88_13.raw	6505020	10379.2	22.6331	13.3414
Proteinuric_2	Alb	Aldh18a1	Alb_vs_Aldh18a1	F:\Yifan\20230908_singletubule_raw\230812_st_88_14.raw	4446690	10838.6	22.0843	13.4039
Proteinuric_2	Alb	Aldh18a1	Alb_vs_Aldh18a1	F:\Yifan\20230908_singletubule_raw\230812_st_88_21.raw	2402570	16005.2	21.1961	13.9663
Proteinuric_2	Alb	Aldh18a1	Alb_vs_Aldh18a1	F:\Yifan\20230908_singletubule_raw\230812_st_88_23.raw	8929200	6238.12	23.0901	12.6069
Proteinuric_2	Alb	Aldh18a1	Alb_vs_Aldh18a1	F:\Yifan\20230908_singletubule_raw\230812_st_88_27.raw	14391900	23663.7	23.7788	14.5304
Proteinuric_2	Alb	Aldh18a1	Alb_vs_Aldh18a1	F:\Yifan\20230908_singletubule_raw\230812_st_88_3.raw	10321200	8843.91	23.2991	13.1105
Proteinuric_2	Alb	Aldh18a1	Alb_vs_Aldh18a1	F:\Yifan\20230908_singletubule_raw\230812_st_88_31.raw	3236490	9910.67	21.626	13.2748
Proteinuric_2	Alb	Aldh18a1	Alb_vs_Aldh18a1	F:\Yifan\20230908_singletubule_raw\230812_st_88_35.raw	4908970	18631.9	22.227	14.1855
Proteinuric_2	Alb	Aldh18a1	Alb_vs_Aldh18a1	F:\Yifan\20230908_singletubule_raw\230812_st_88_36.raw	1149970	6031.27	20.1332	12.5582
Proteinuric_2	Alb	Aldh18a1	Alb_vs_Aldh18a1	F:\Yifan\20230908_singletubule_raw\230812_st_88_37.raw	4042880	11931.8	21.947	13.5425
Proteinuric_2	Alb	Aldh18a1	Alb_vs_Aldh18a1	F:\Yifan\20230908_singletubule_raw\230812_st_88_38.raw	7018090	12503.3	22.7426	13.61
Proteinuric_2	Alb	Aldh18a1	Alb_vs_Aldh18a1	F:\Yifan\20230908_singletubule_raw\230812_st_88_43.raw	3126170	7751	21.576	12.9202
Proteinuric_2	Alb	Aldh18a1	Alb_vs_Aldh18a1	F:\Yifan\20230908_singletubule_raw\230812_st_88_45.raw	11347200	15265.9	23.4358	13.898
Proteinuric_2	Alb	Aldh18a1	Alb_vs_Aldh18a1	F:\Yifan\20230908_singletubule_raw\230812_st_88_47.raw	5064750	16516.7	22.2721	14.0116
Proteinuric_2	Alb	Aldh18a1	Alb_vs_Aldh18a1	F:\Yifan\20230908_singletubule_raw\230812_st_88_48.raw	3716350	12223.6	21.8255	13.5774
Proteinuric_2	Alb	Aldh18a1	Alb_vs_Aldh18a1	F:\Yifan\20230908_singletubule_raw\230812_st_88_49.raw	7868660	13011.5	22.9077	13.6675
Proteinuric_2	Alb	Aldh18a1	Alb_vs_Aldh18a1	F:\Yifan\20230908_singletubule_raw\230812_st_88_55.raw	5674400	15158.8	22.436	13.8879
Proteinuric_2	Alb	Aldh18a1	Alb_vs_Aldh18a1	F:\Yifan\20230908_singletubule_raw\230812_st_88_56.raw	5751420	23616.3	22.4555	14.5275
Proteinuric_2	Alb	Aldh18a1	Alb_vs_Aldh18a1	F:\Yifan\20230908_singletubule_raw\230812_st_88_57.raw	2409490	18238.5	21.2003	14.1547
Proteinuric_2	Alb	Aldh18a1	Alb_vs_Aldh18a1	F:\Yifan\20230908_singletubule_raw\230812_st_88_6.raw	6351310	8191.86	22.5986	13
Proteinuric_2	Alb	Aldh18a1	Alb_vs_Aldh18a1	F:\Yifan\20230908_singletubule_raw\230812_st_88_61.raw	9613750	14567.4	23.1967	13.8305
Proteinuric_2	Alb	Aldh18a1	Alb_vs_Aldh18a1	F:\Yifan\20230908_singletubule_raw\230812_st_88_62.raw	7272820	17747.4	22.7941	14.1153
Proteinuric_2	Alb	Aldh18a1	Alb_vs_Aldh18a1	F:\Yifan\20230908_singletubule_raw\230812_st_88_75.raw	10368200	21184.1	23.3057	14.3707
Proteinuric_2	Alb	Aldh18a1	Alb_vs_Aldh18a1	F:\Yifan\20230908_singletubule_raw\230812_st_88_77.raw	7767400	13957	22.889	13.7687
Proteinuric_2	Alb	Aldh18a1	Alb_vs_Aldh18a1	F:\Yifan\20230908_singletubule_raw\230812_st_88_8.raw	7171670	21815.3	22.7739	14.4131
Proteinuric_2	Alb	Aldh18a1	Alb_vs_Aldh18a1	F:\Yifan\20230908_singletubule_raw\230812_st_88_86.raw	6568710	12888	22.6472	13.6537
Proteinuric_2	Alb	Aldh18a1	Alb_vs_Aldh18a1	F:\Yifan\20230908_singletubule_raw\230812_st_88_89.raw	4042340	7105.41	21.9468	12.7947
Proteinuric_2	Alb	Aldh18a1	Alb_vs_Aldh18a1	F:\Yifan\20230908_singletubule_raw\230812_st_88_9.raw	5099460	12284	22.2819	13.5845
Proteinuric_2	Alb	Aldh18a1	Alb_vs_Aldh18a1	F:\Yifan\20230908_singletubule_raw\230815_st_88_34.raw	1556770	16000.3	20.5701	13.9658
Proteinuric_2	Alb	Cps1	Alb_vs_Cps1	F:\Yifan\20230908_singletubule_raw\230812_st_88_10.raw	7979580		22.9279		49271.9	15.5885
Proteinuric_2	Alb	Cps1	Alb_vs_Cps1	F:\Yifan\20230908_singletubule_raw\230812_st_88_13.raw	6505020		22.6331		72455.7	16.1448
Proteinuric_2	Alb	Cps1	Alb_vs_Cps1	F:\Yifan\20230908_singletubule_raw\230812_st_88_14.raw	4446690		22.0843		39059.3	15.2534
Proteinuric_2	Alb	Cps1	Alb_vs_Cps1	F:\Yifan\20230908_singletubule_raw\230812_st_88_20.raw	2774920		21.404		24273.8	14.5671
Proteinuric_2	Alb	Cps1	Alb_vs_Cps1	F:\Yifan\20230908_singletubule_raw\230812_st_88_22.raw	2924990		21.48		20662.1	14.3347
Proteinuric_2	Alb	Cps1	Alb_vs_Cps1	F:\Yifan\20230908_singletubule_raw\230812_st_88_23.raw	8929200		23.0901		71603	16.1277
Proteinuric_2	Alb	Cps1	Alb_vs_Cps1	F:\Yifan\20230908_singletubule_raw\230812_st_88_25.raw	15504500		23.8862		87030.9	16.4092
Proteinuric_2	Alb	Cps1	Alb_vs_Cps1	F:\Yifan\20230908_singletubule_raw\230812_st_88_27.raw	14391900		23.7788		99632.3	16.6043
Proteinuric_2	Alb	Cps1	Alb_vs_Cps1	F:\Yifan\20230908_singletubule_raw\230812_st_88_28.raw	12679600		23.596		75702.4	16.2081
Proteinuric_2	Alb	Cps1	Alb_vs_Cps1	F:\Yifan\20230908_singletubule_raw\230812_st_88_3.raw	10321200		23.2991		42883.7	15.3881
Proteinuric_2	Alb	Cps1	Alb_vs_Cps1	F:\Yifan\20230908_singletubule_raw\230812_st_88_31.raw	3236490		21.626		32173.7	14.9736
Proteinuric_2	Alb	Cps1	Alb_vs_Cps1	F:\Yifan\20230908_singletubule_raw\230812_st_88_35.raw	4908970		22.227		52980.1	15.6932
Proteinuric_2	Alb	Cps1	Alb_vs_Cps1	F:\Yifan\20230908_singletubule_raw\230812_st_88_37.raw	4042880		21.947		18809.3	14.1992
Proteinuric_2	Alb	Cps1	Alb_vs_Cps1	F:\Yifan\20230908_singletubule_raw\230812_st_88_38.raw	7018090		22.7426		41974.4	15.3572
Proteinuric_2	Alb	Cps1	Alb_vs_Cps1	F:\Yifan\20230908_singletubule_raw\230812_st_88_42.raw	4454450		22.0868		69205.8	16.0786
Proteinuric_2	Alb	Cps1	Alb_vs_Cps1	F:\Yifan\20230908_singletubule_raw\230812_st_88_43.raw	3126170		21.576		29175.9	14.8325
Proteinuric_2	Alb	Cps1	Alb_vs_Cps1	F:\Yifan\20230908_singletubule_raw\230812_st_88_45.raw	11347200		23.4358		63204.4	15.9477
Proteinuric_2	Alb	Cps1	Alb_vs_Cps1	F:\Yifan\20230908_singletubule_raw\230812_st_88_47.raw	5064750		22.2721		37081.3	15.1784
Proteinuric_2	Alb	Cps1	Alb_vs_Cps1	F:\Yifan\20230908_singletubule_raw\230812_st_88_49.raw	7868660		22.9077		63262.9	15.9491
Proteinuric_2	Alb	Cps1	Alb_vs_Cps1	F:\Yifan\20230908_singletubule_raw\230812_st_88_55.raw	5674400		22.436		75617.8	16.2064
Proteinuric_2	Alb	Cps1	Alb_vs_Cps1	F:\Yifan\20230908_singletubule_raw\230812_st_88_56.raw	5751420		22.4555		42451.5	15.3735
Proteinuric_2	Alb	Cps1	Alb_vs_Cps1	F:\Yifan\20230908_singletubule_raw\230812_st_88_57.raw	2409490		21.2003		17452.2	14.0911
Proteinuric_2	Alb	Cps1	Alb_vs_Cps1	F:\Yifan\20230908_singletubule_raw\230812_st_88_6.raw	6351310		22.5986		45469.9	15.4726
Proteinuric_2	Alb	Cps1	Alb_vs_Cps1	F:\Yifan\20230908_singletubule_raw\230812_st_88_61.raw	9613750		23.1967		100500	16.6168
Proteinuric_2	Alb	Cps1	Alb_vs_Cps1	F:\Yifan\20230908_singletubule_raw\230812_st_88_62.raw	7272820		22.7941		60324.2	15.8804
Proteinuric_2	Alb	Cps1	Alb_vs_Cps1	F:\Yifan\20230908_singletubule_raw\230812_st_88_66.raw	6721370		22.6803		66335.5	16.0175
Proteinuric_2	Alb	Cps1	Alb_vs_Cps1	F:\Yifan\20230908_singletubule_raw\230812_st_88_67.raw	6733460		22.6829		23679.6	14.5314
Proteinuric_2	Alb	Cps1	Alb_vs_Cps1	F:\Yifan\20230908_singletubule_raw\230812_st_88_7.raw	3206940		21.6128		29501.7	14.8485
Proteinuric_2	Alb	Cps1	Alb_vs_Cps1	F:\Yifan\20230908_singletubule_raw\230812_st_88_75.raw	10368200		23.3057		76646.9	16.2259
Proteinuric_2	Alb	Cps1	Alb_vs_Cps1	F:\Yifan\20230908_singletubule_raw\230812_st_88_77.raw	7767400		22.889		65942.1	16.0089
Proteinuric_2	Alb	Cps1	Alb_vs_Cps1	F:\Yifan\20230908_singletubule_raw\230812_st_88_8.raw	7171670		22.7739		73511.4	16.1657
Proteinuric_2	Alb	Cps1	Alb_vs_Cps1	F:\Yifan\20230908_singletubule_raw\230812_st_88_86.raw	6568710		22.6472		37995.3	15.2135
Proteinuric_2	Alb	Cps1	Alb_vs_Cps1	F:\Yifan\20230908_singletubule_raw\230812_st_88_89.raw	4042340		21.9468		36309.2	15.148
Proteinuric_2	Alb	Cps1	Alb_vs_Cps1	F:\Yifan\20230908_singletubule_raw\230812_st_88_9.raw	5099460		22.2819		32907.3	15.0061
Proteinuric_2	Alb	Cps1	Alb_vs_Cps1	F:\Yifan\20230908_singletubule_raw\230812_st_88_90.raw	10642900		23.3434		59615.9	15.8634
Proteinuric_2	Alb	Cps1	Alb_vs_Cps1	F:\Yifan\20230908_singletubule_raw\230812_st_88_91.raw	4500910		22.1018		42885.6	15.3882
Proteinuric_2	Alb	Cps1	Alb_vs_Cps1	F:\Yifan\20230908_singletubule_raw\230812_st_88_94.raw	5326770		22.3448		64722.2	15.982
Proteinuric_2	Alb	Cps1	Alb_vs_Cps1	F:\Yifan\20230908_singletubule_raw\230812_st_88_96.raw	9126300		23.1216		90112.6	16.4594
Proteinuric_2	Alb	Cps1	Alb_vs_Cps1	F:\Yifan\20230908_singletubule_raw\230815_st_88_88.raw	6087440		22.5374		14394.9	13.8133
Proteinuric_2	Alb	Prodh	Alb_vs_Prodh	F:\Yifan\20230908_singletubule_raw\230812_st_88_1.raw	14192300		23.7586				186010	17.505
Proteinuric_2	Alb	Prodh	Alb_vs_Prodh	F:\Yifan\20230908_singletubule_raw\230812_st_88_10.raw	7979580		22.9279				248471	17.9227
Proteinuric_2	Alb	Prodh	Alb_vs_Prodh	F:\Yifan\20230908_singletubule_raw\230812_st_88_11.raw	2791860		21.4128				251594	17.9407
Proteinuric_2	Alb	Prodh	Alb_vs_Prodh	F:\Yifan\20230908_singletubule_raw\230812_st_88_13.raw	6505020		22.6331				145319	17.1489
Proteinuric_2	Alb	Prodh	Alb_vs_Prodh	F:\Yifan\20230908_singletubule_raw\230812_st_88_14.raw	4446690		22.0843				159174	17.2802
Proteinuric_2	Alb	Prodh	Alb_vs_Prodh	F:\Yifan\20230908_singletubule_raw\230812_st_88_20.raw	2774920		21.404				204650	17.6428
Proteinuric_2	Alb	Prodh	Alb_vs_Prodh	F:\Yifan\20230908_singletubule_raw\230812_st_88_21.raw	2402570		21.1961				174674	17.4143
Proteinuric_2	Alb	Prodh	Alb_vs_Prodh	F:\Yifan\20230908_singletubule_raw\230812_st_88_22.raw	2924990		21.48				212954	17.7002
Proteinuric_2	Alb	Prodh	Alb_vs_Prodh	F:\Yifan\20230908_singletubule_raw\230812_st_88_23.raw	8929200		23.0901				209141	17.6741
Proteinuric_2	Alb	Prodh	Alb_vs_Prodh	F:\Yifan\20230908_singletubule_raw\230812_st_88_25.raw	15504500		23.8862				45151.2	15.4625
Proteinuric_2	Alb	Prodh	Alb_vs_Prodh	F:\Yifan\20230908_singletubule_raw\230812_st_88_27.raw	14391900		23.7788				75459.7	16.2034
Proteinuric_2	Alb	Prodh	Alb_vs_Prodh	F:\Yifan\20230908_singletubule_raw\230812_st_88_28.raw	12679600		23.596				173085	17.4011
Proteinuric_2	Alb	Prodh	Alb_vs_Prodh	F:\Yifan\20230908_singletubule_raw\230812_st_88_3.raw	10321200		23.2991				119380	16.8652
Proteinuric_2	Alb	Prodh	Alb_vs_Prodh	F:\Yifan\20230908_singletubule_raw\230812_st_88_31.raw	3236490		21.626				181144	17.4668
Proteinuric_2	Alb	Prodh	Alb_vs_Prodh	F:\Yifan\20230908_singletubule_raw\230812_st_88_33.raw	3508420		21.7424				377406	18.5258
Proteinuric_2	Alb	Prodh	Alb_vs_Prodh	F:\Yifan\20230908_singletubule_raw\230812_st_88_35.raw	4908970		22.227				314630	18.2633
Proteinuric_2	Alb	Prodh	Alb_vs_Prodh	F:\Yifan\20230908_singletubule_raw\230812_st_88_36.raw	1149970		20.1332				270824	18.047
Proteinuric_2	Alb	Prodh	Alb_vs_Prodh	F:\Yifan\20230908_singletubule_raw\230812_st_88_37.raw	4042880		21.947				235093	17.8429
Proteinuric_2	Alb	Prodh	Alb_vs_Prodh	F:\Yifan\20230908_singletubule_raw\230812_st_88_38.raw	7018090		22.7426				141266	17.1081
Proteinuric_2	Alb	Prodh	Alb_vs_Prodh	F:\Yifan\20230908_singletubule_raw\230812_st_88_42.raw	4454450		22.0868				197707	17.593
Proteinuric_2	Alb	Prodh	Alb_vs_Prodh	F:\Yifan\20230908_singletubule_raw\230812_st_88_43.raw	3126170		21.576				152065	17.2143
Proteinuric_2	Alb	Prodh	Alb_vs_Prodh	F:\Yifan\20230908_singletubule_raw\230812_st_88_45.raw	11347200		23.4358				175368	17.42
Proteinuric_2	Alb	Prodh	Alb_vs_Prodh	F:\Yifan\20230908_singletubule_raw\230812_st_88_47.raw	5064750		22.2721				173958	17.4084
Proteinuric_2	Alb	Prodh	Alb_vs_Prodh	F:\Yifan\20230908_singletubule_raw\230812_st_88_48.raw	3716350		21.8255				152328	17.2168
Proteinuric_2	Alb	Prodh	Alb_vs_Prodh	F:\Yifan\20230908_singletubule_raw\230812_st_88_49.raw	7868660		22.9077				159387	17.2822
Proteinuric_2	Alb	Prodh	Alb_vs_Prodh	F:\Yifan\20230908_singletubule_raw\230812_st_88_54.raw	6401190		22.6099				227175	17.7934
Proteinuric_2	Alb	Prodh	Alb_vs_Prodh	F:\Yifan\20230908_singletubule_raw\230812_st_88_55.raw	5674400		22.436				156987	17.2603
Proteinuric_2	Alb	Prodh	Alb_vs_Prodh	F:\Yifan\20230908_singletubule_raw\230812_st_88_56.raw	5751420		22.4555				103538	16.6598
Proteinuric_2	Alb	Prodh	Alb_vs_Prodh	F:\Yifan\20230908_singletubule_raw\230812_st_88_57.raw	2409490		21.2003				283514	18.1131
Proteinuric_2	Alb	Prodh	Alb_vs_Prodh	F:\Yifan\20230908_singletubule_raw\230812_st_88_6.raw	6351310		22.5986				225333	17.7817
Proteinuric_2	Alb	Prodh	Alb_vs_Prodh	F:\Yifan\20230908_singletubule_raw\230812_st_88_61.raw	9613750		23.1967				163039	17.3149
Proteinuric_2	Alb	Prodh	Alb_vs_Prodh	F:\Yifan\20230908_singletubule_raw\230812_st_88_62.raw	7272820		22.7941				120655	16.8805
Proteinuric_2	Alb	Prodh	Alb_vs_Prodh	F:\Yifan\20230908_singletubule_raw\230812_st_88_66.raw	6721370		22.6803				233570	17.8335
Proteinuric_2	Alb	Prodh	Alb_vs_Prodh	F:\Yifan\20230908_singletubule_raw\230812_st_88_67.raw	6733460		22.6829				225978	17.7858
Proteinuric_2	Alb	Prodh	Alb_vs_Prodh	F:\Yifan\20230908_singletubule_raw\230812_st_88_7.raw	3206940		21.6128				254896	17.9595
Proteinuric_2	Alb	Prodh	Alb_vs_Prodh	F:\Yifan\20230908_singletubule_raw\230812_st_88_71.raw	3458250		21.7216				306941	18.2276
Proteinuric_2	Alb	Prodh	Alb_vs_Prodh	F:\Yifan\20230908_singletubule_raw\230812_st_88_75.raw	10368200		23.3057				51226	15.6446
Proteinuric_2	Alb	Prodh	Alb_vs_Prodh	F:\Yifan\20230908_singletubule_raw\230812_st_88_76.raw	7747740		22.8853				96510.2	16.5584
Proteinuric_2	Alb	Prodh	Alb_vs_Prodh	F:\Yifan\20230908_singletubule_raw\230812_st_88_77.raw	7767400		22.889				306335	18.2248
Proteinuric_2	Alb	Prodh	Alb_vs_Prodh	F:\Yifan\20230908_singletubule_raw\230812_st_88_8.raw	7171670		22.7739				91506.5	16.4816
Proteinuric_2	Alb	Prodh	Alb_vs_Prodh	F:\Yifan\20230908_singletubule_raw\230812_st_88_83.raw	1877440		20.8403				293292	18.162
Proteinuric_2	Alb	Prodh	Alb_vs_Prodh	F:\Yifan\20230908_singletubule_raw\230812_st_88_86.raw	6568710		22.6472				275055	18.0694
Proteinuric_2	Alb	Prodh	Alb_vs_Prodh	F:\Yifan\20230908_singletubule_raw\230812_st_88_89.raw	4042340		21.9468				142142	17.117
Proteinuric_2	Alb	Prodh	Alb_vs_Prodh	F:\Yifan\20230908_singletubule_raw\230812_st_88_9.raw	5099460		22.2819				233401	17.8325
Proteinuric_2	Alb	Prodh	Alb_vs_Prodh	F:\Yifan\20230908_singletubule_raw\230812_st_88_90.raw	10642900		23.3434				282319	18.107
Proteinuric_2	Alb	Prodh	Alb_vs_Prodh	F:\Yifan\20230908_singletubule_raw\230812_st_88_91.raw	4500910		22.1018				233912	17.8356
Proteinuric_2	Alb	Prodh	Alb_vs_Prodh	F:\Yifan\20230908_singletubule_raw\230812_st_88_94.raw	5326770		22.3448				370133	18.4977
Proteinuric_2	Alb	Prodh	Alb_vs_Prodh	F:\Yifan\20230908_singletubule_raw\230812_st_88_96.raw	9126300		23.1216				288560	18.1385
Proteinuric_2	Alb	Prodh	Alb_vs_Prodh	F:\Yifan\20230908_singletubule_raw\230815_st_88_16.raw	3510090		21.7431				403192	18.6211
Proteinuric_2	Alb	Prodh	Alb_vs_Prodh	F:\Yifan\20230908_singletubule_raw\230815_st_88_34.raw	1556770		20.5701				184819	17.4958
Proteinuric_2	Alb	Prodh	Alb_vs_Prodh	F:\Yifan\20230908_singletubule_raw\230815_st_88_39.raw	3246920		21.6306				281827	18.1045
Proteinuric_2	Alb	Prodh	Alb_vs_Prodh	F:\Yifan\20230908_singletubule_raw\230815_st_88_40.raw	1904830		20.8612				324467	18.3077
Proteinuric_2	Alb	Prodh	Alb_vs_Prodh	F:\Yifan\20230908_singletubule_raw\230815_st_88_59.raw	1221830		20.2206				201344	17.6193
Proteinuric_2	Alb	Prodh	Alb_vs_Prodh	F:\Yifan\20230908_singletubule_raw\230815_st_88_72.raw	2249480		21.1012				279258	18.0912
Proteinuric_2	Alb	Prodh	Alb_vs_Prodh	F:\Yifan\20230908_singletubule_raw\230815_st_88_73.raw	2548610		21.2813				344687	18.3949
Proteinuric_2	Alb	Prodh	Alb_vs_Prodh	F:\Yifan\20230908_singletubule_raw\230815_st_88_88.raw	6087440		22.5374				347610	18.4071

## Sheet: Pairs_summary
MouseID	Protein_X	Protein_Y	Pair	N_paired_samples	Spearman_rho	P_value	Mean_Alb_raw	Mean_Aldh18a1_raw	Mean_Alb_log2	Mean_Aldh18a1_log2	Mean_Cps1_raw	Mean_Cps1_log2	Mean_Prodh_raw	Mean_Prodh_log2
Proteinuric_1	Alb	Aldh18a1	Alb_vs_Aldh18a1	31	0.454435	0.0102222	8.35909e+06	16815.5	22.9003	13.9165
Proteinuric_1	Alb	Cps1	Alb_vs_Cps1	42	0.44575	0.00309189	8.41451e+06		22.8922		64601.9	15.7954
Proteinuric_1	Alb	Prodh	Alb_vs_Prodh	60	-0.697472	5.94265e-10	7.47214e+06		22.6598				212444	17.497
Proteinuric_2	Alb	Aldh18a1	Alb_vs_Aldh18a1	30	0.259177	0.16666	6.03052e+06	13831.5	22.3094	13.6625
Proteinuric_2	Alb	Cps1	Alb_vs_Cps1	39	0.72004	2.37935e-07	6.87083e+06		22.5628		52482.5	15.5166
Proteinuric_2	Alb	Prodh	Alb_vs_Prodh	56	-0.407314	0.00183559	5.9187e+06		22.2408				215526	17.587
