# Supplementary material for: Diversion of Arginine’s dietary metabolic fate in proteinuric kidney disease
Source: Research Square preprint supplement (doi:10.21203/rs.3.rs-9927381/v1), 2026-06-17
Supplement: Supplementary file 5 [file 33b0b473668ff264d1ead5c3.xlsx]

## Sheet: Liver
Organ	Sample	R.Condition	PG.Genes	PG.ProteinNames	PG.UniProtIds	PG.NrOfStrippedSequencesUsedForQuantification	PG.Coverage	PG.Pvalue	PG.Qvalue	PG.Log2Quantity	PG.IBAQ	PG.MS1Quantity	PG.MS2Quantity	PG.Quantity	PG.MS2Channel1	PG.MS2Channel2	PG.MS2Channel3
Liver	Control_AD_1	Control_AD	Alb	ALBU_MOUSE	P07724	31	53.1%	9.58713e-15	0	23.4779		68912104	11682619	11682619	311146	29017.4
Liver	Control_AD_2	Control_AD	Alb	ALBU_MOUSE	P07724	27	46.5%	9.58713e-15	0	22.591		35707396	6.31803e+06	6.31803e+06	163622	16110.3
Liver	Control_AD_3	Control_AD	Alb	ALBU_MOUSE	P07724	30	50.5%	9.58713e-15	0	22.5772		30291174	6.25765e+06	6.25765e+06	164688	12334.7
Liver	Control_AD_4	Control_AD	Alb	ALBU_MOUSE	P07724	33	56.4%	9.58713e-15	0	24.2146		108238280	19468198	19468198	514711	44952.8
Liver	Control_AD_5	Control_AD	Alb	ALBU_MOUSE	P07724	33	52.5%	9.58713e-15	0	22.7787		40377264	7.19559e+06	7.19559e+06	209204	25012.7
Liver	Control_AD_6	Control_AD	Alb	ALBU_MOUSE	P07724	32	50.3%	9.58713e-15	0	23.1385		48647088	9233816	9233816	277837	30495
Liver	Control_CD_1	Control_CD	Alb	ALBU_MOUSE	P07724	35	53.9%	9.58713e-15	0	23.372		54081188	10856398	10856398	329956	181.772
Liver	Control_CD_2	Control_CD	Alb	ALBU_MOUSE	P07724	37	56.2%	9.58713e-15	0	23.6748		69377496	13391413	13391413	471020	132.904
Liver	Control_CD_3	Control_CD	Alb	ALBU_MOUSE	P07724	32	49.3%	9.58713e-15	0	22.4982		28940064	5.92422e+06	5.92422e+06	237029	241.667
Liver	Control_CD_4	Control_CD	Alb	ALBU_MOUSE	P07724	38	56.9%	9.58713e-15	0	23.16		48691536	9372272	9372272	345628	339.399
Liver	Control_CD_5	Control_CD	Alb	ALBU_MOUSE	P07724	32	56.9%	9.58713e-15	0	23.5749		68931968	12495206	12495206	392517	113.205
Liver	Control_CD_6	Control_CD	Alb	ALBU_MOUSE	P07724	38	61.7%	9.58713e-15	0	24.1223		112632192	18261426	18261426	595058	449.16
Liver	Proteinuric_AD_1	Proteinuric_AD	Alb	ALBU_MOUSE	P07724	33	53.9%	9.58713e-15	0	24.1022		100280584	18009176	18009176	426579	43638.2
Liver	Proteinuric_AD_2	Proteinuric_AD	Alb	ALBU_MOUSE	P07724	29	47.7%	9.58713e-15	0	22.8602		41474312	7614104	7614104	195230	17685.8
Liver	Proteinuric_AD_3	Proteinuric_AD	Alb	ALBU_MOUSE	P07724	33	53.3%	9.58713e-15	0	23.3102		57075852	10400997	10400997	242986	35175.6
Liver	Proteinuric_AD_4	Proteinuric_AD	Alb	ALBU_MOUSE	P07724	30	50.7%	9.58713e-15	0	23.0437		50408472	8646647	8646647	294104	17274.7
Liver	Proteinuric_AD_5	Proteinuric_AD	Alb	ALBU_MOUSE	P07724	32	57.6%	9.58713e-15	0	24.2455		121315032	19889402	19889402	367846	18511.3
Liver	Proteinuric_CD_1	Proteinuric_CD	Alb	ALBU_MOUSE	P07724	32	53.9%	9.58713e-15	0	23.6185		68395200	12878737	12878737	451908	16.2949
Liver	Proteinuric_CD_2	Proteinuric_CD	Alb	ALBU_MOUSE	P07724	37	56.9%	9.58713e-15	0	23.4689		56237288	11610423	11610423	375436	308.315
Liver	Proteinuric_CD_3	Proteinuric_CD	Alb	ALBU_MOUSE	P07724	32	48.5%	9.58713e-15	0	23.0364		41176180	8603183	8603183	370941	358.109
Liver	Proteinuric_CD_4	Proteinuric_CD	Alb	ALBU_MOUSE	P07724	40	64.1%	9.58713e-15	0	23.6156		60401552	12852608	12852608	409376	1
