# Supplementary material for: Diversion of Arginine’s dietary metabolic fate in proteinuric kidney disease
Source: Research Square preprint supplement (doi:10.21203/rs.3.rs-9927381/v1), 2026-06-17
Supplement: Supplementary file 6 [file 3a64f7311b90a3aef70a2e3c.xlsx]

## Sheet: Sheet1
Metabolite	Metabolite	mass difference	IsotopeLabel	Metabolite_mass_diff	ratio_col_used	Organ	n_Proteinuric_totalrows	n_Control_totalrows	n_nonmissing_ratio_Proteinuric	n_nonmissing_ratio_Control	mean_ratio_Proteinuric	mean_ratio_Control	median_ratio_Proteinuric	median_ratio_Control	log2_ratio_Proteinuric_minus_Control	fold_change_Proteinuric_over_Control	mean_area_Proteinuric	mean_area_Control	log10_area_Proteinuric	log10_area_Control	u_statistic_mannwhitney	pvalue_mannwhitney	p_adj_bh	significant_p_lt_0_05	significant_fdr_lt_0_05
Arginine	Arg	m + 10	13C615N4	Arg (m + 10)	Ratio10To0	Cortex	5	6	5	6	0.368257	0.426671	0.29411	0.429688	-0.212411	0.863094	1.40087e+06	1.2706e+06	6.1464	6.10401	11	0.536797	0.742569	FALSE	FALSE
Arginine	Arg	m + 10	13C615N4	Arg (m + 10)	Ratio10To0	Medulla	5	6	5	6	0.444226	0.437261	0.357632	0.431974	0.0227976	1.01593	1.21396e+06	1.31251e+06	6.0842	6.1181	12	0.662338	0.822554	FALSE	FALSE
Arginine	Arg	m + 10	13C615N4	Arg (m + 10)	Ratio10To0	Liver	5	6	5	6	5.14227	1.67173	3.5932	1.87543	1.62106	3.07601	254790	68904.6	5.40618	4.83825	28	0.017316	0.116532	TRUE	FALSE
Arginine	Arg	m + 10	13C615N4	Arg (m + 10)	Ratio10To0	Heart	5	6	5	6	0.433692	0.438585	0.355617	0.432978	-0.0161854	0.988844	1.17344e+06	1.00579e+06	6.06946	6.00251	11	0.536797	0.742569	FALSE	FALSE
Arginine	Arg	m + 10	13C615N4	Arg (m + 10)	Ratio10To0	Muscle	5	6	5	6	0.500697	0.446277	0.412985	0.438997	0.165998	1.12194	1.72027e+06	2.21462e+06	6.2356	6.3453	15	1	1	FALSE	FALSE
Arginine	Arg	m + 10	13C615N4	Arg (m + 10)	Ratio10To0	Brain	5	6	5	6	0.164006	0.174492	0.144829	0.188454	-0.0894079	0.939908	447725	534964	5.65101	5.72832	14	0.930736	0.969679	FALSE	FALSE
Arginine	Arg	m + 10	13C615N4	Arg (m + 10)	Ratio10To0	Lung	5	6	5	6	0.473044	0.433545	0.355307	0.436834	0.125793	1.09111	1.08947e+06	827089	6.03721	5.91755	12	0.662338	0.822554	FALSE	FALSE
Arginine	Arg	m + 10	13C615N4	Arg (m + 10)	Ratio10To0	Spleen	5	6	5	6	0.4632	0.440138	0.349796	0.414762	0.0736782	1.0524	951742	986852	5.97852	5.99425	11	0.536797	0.742569	FALSE	FALSE
Arginine	Arg	m + 10	13C615N4	Arg (m + 10)	Ratio10To0	Duodenum	5	6	5	6	1.17947	1.24392	1.24503	1.10022	-0.0767592	0.948185	2.99812e+06	2.53417e+06	6.47685	6.40384	15	1	1	FALSE	FALSE
Arginine	Arg	m + 10	13C615N4	Arg (m + 10)	Ratio10To0	Jejunum	5	6	5	6	0.831977	1.16752	0.883309	0.660426	-0.488834	0.712601	2.65975e+06	2.32653e+06	6.42484	6.36671	15	1	1	FALSE	FALSE
Arginine	Arg	m + 10	13C615N4	Arg (m + 10)	Ratio10To0	Ileum	5	6	5	6	0.526742	0.531661	0.428819	0.513943	-0.0134095	0.990748	1.16176e+06	1.33418e+06	6.06511	6.12522	12	0.662338	0.822554	FALSE	FALSE
Arginine	Arg	m + 10	13C615N4	Arg (m + 10)	Ratio10To0	Colon	5	6	5	6	0.455319	0.471614	0.327323	0.459032	-0.0507316	0.965447	697779	723618	5.84372	5.85951	11	0.536797	0.742569	FALSE	FALSE
Arginine	Arg	m + 10	13C615N4	Arg (m + 10)	Ratio10To0	Erythrocytes	5	6	5	6	0.384889	0.42018	0.352601	0.42707	-0.126567	0.916009	1.20112e+06	965132	6.07959	5.98459	10	0.428571	0.662822	FALSE	FALSE
Arginine	Arg	m + 10	13C615N4	Arg (m + 10)	Ratio10To0	Plasma	5	6	5	6	0.572766	0.445719	0.584296	0.409875	0.361813	1.28504	1.63335e+06	1.3284e+06	6.21308	6.12333	17	0.792208	0.882594	FALSE	FALSE
Arginine	Arg	m + 10	13C615N4	Arg (m + 10)	Ratio10To0	Urine	4	6	4	6	7.36611	25.1609	5.53887	24.2828	-1.77221	0.29276	5.88223e+06	4.85569e+06	6.76954	6.68625	1	0.0190476	0.121612	TRUE	FALSE
Ornithine	Orn	m + 7	13C515N2	Orn (m + 7)	Ratio7To0	Cortex	5	6	5	6	1.92725	1.39792	1.81982	1.40988	0.463262	1.37866	293289	100050	5.4673	5.00022	22	0.246753	0.509888	FALSE	FALSE
Ornithine	Orn	m + 7	13C515N2	Orn (m + 7)	Ratio7To0	Medulla	5	6	5	6	1.82348	1.17443	1.47983	1.06845	0.63474	1.55266	217821	125927	5.3381	5.10012	25	0.0822511	0.294684	FALSE	FALSE
Ornithine	Orn	m + 7	13C515N2	Orn (m + 7)	Ratio7To0	Liver	5	6	5	6	0.866505	0.987713	0.684187	0.894795	-0.188884	0.877284	1.07824e+06	851439	6.03272	5.93015	10	0.428571	0.662822	FALSE	FALSE
Ornithine	Orn	m + 7	13C515N2	Orn (m + 7)	Ratio7To0	Heart	5	6	5	6	0.652468	0.505841	0.632045	0.581845	0.367224	1.28987	209847	125901	5.3219	5.10003	19	0.536797	0.742569	FALSE	FALSE
Ornithine	Orn	m + 7	13C515N2	Orn (m + 7)	Ratio7To0	Muscle	5	6	5	6	1.0083	0.769974	1.0578	0.774122	0.389038	1.30952	80845.8	55091.2	4.90766	4.74108	23	0.177489	0.45328	FALSE	FALSE
Ornithine	Orn	m + 7	13C515N2	Orn (m + 7)	Ratio7To0	Brain	5	6	5	6	0.481732	0.245907	0.426216	0.250765	0.970118	1.959	20295.2	10745.2	4.30739	4.03121	27	0.030303	0.157197	TRUE	FALSE
Ornithine	Orn	m + 7	13C515N2	Orn (m + 7)	Ratio7To0	Lung	5	6	5	6	0.88122	0.662923	0.8621	0.641484	0.41066	1.32929	191711	253483	5.28265	5.40395	22	0.246753	0.509888	FALSE	FALSE
Ornithine	Orn	m + 7	13C515N2	Orn (m + 7)	Ratio7To0	Spleen	5	6	5	6	0.651662	0.49492	0.631961	0.482034	0.39693	1.3167	24801.8	27124.3	4.39448	4.43336	22	0.246753	0.509888	FALSE	FALSE
Ornithine	Orn	m + 7	13C515N2	Orn (m + 7)	Ratio7To0	Duodenum	5	6	5	6	1.0317	0.822128	1.15788	0.797917	0.327592	1.25492	307273	288338	5.48752	5.4599	18	0.662338	0.822554	FALSE	FALSE
Ornithine	Orn	m + 7	13C515N2	Orn (m + 7)	Ratio7To0	Jejunum	5	6	5	6	0.778561	0.558765	0.96217	0.263646	0.478569	1.39336	231701	180686	5.36493	5.25693	23	0.177489	0.45328	FALSE	FALSE
Ornithine	Orn	m + 7	13C515N2	Orn (m + 7)	Ratio7To0	Ileum	5	6	5	6	0.399283	0.169959	0.315542	0.164847	1.23222	2.34928	97893	41831.6	4.99075	4.6215	30	0.004329	0.0552781	TRUE	FALSE
Ornithine	Orn	m + 7	13C515N2	Orn (m + 7)	Ratio7To0	Colon	5	6	5	6	0.601022	0.498716	0.619207	0.446122	0.269202	1.20514	120282	81243.5	5.0802	4.90979	18	0.662338	0.822554	FALSE	FALSE
Ornithine	Orn	m + 7	13C515N2	Orn (m + 7)	Ratio7To0	Erythrocytes	5	6	5	6	0.854452	0.763208	0.859021	0.822642	0.162923	1.11955	275226	102123	5.43969	5.00912	18	0.662338	0.822554	FALSE	FALSE
Ornithine	Orn	m + 7	13C515N2	Orn (m + 7)	Ratio7To0	Plasma	5	6	5	6	0.888122	0.673843	0.80323	0.606429	0.398347	1.318	337549	194725	5.52834	5.28942	19	0.536797	0.742569	FALSE	FALSE
Ornithine	Orn	m + 7	13C515N2	Orn (m + 7)	Ratio7To0	Urine	4	6	4	6	8.06987	22.3339	7.32765	20.4094	-1.46862	0.361328	1.00833e+06	550206	6.0036	5.74053	0	0.00952381	0.0817734	TRUE	FALSE
Urea	Urea	m + 3	13C215N1	Urea (m + 3)	Ratio3To0	Cortex	5	6	5	6	0.0469172	0.0630224	0.0472796	0.0619393	-0.425748	0.744453	368923	143924	5.56694	5.15813	0	0.004329	0.0552781	TRUE	FALSE
Urea	Urea	m + 3	13C215N1	Urea (m + 3)	Ratio3To0	Medulla	5	6	5	6	0.0463393	0.0633231	0.047179	0.0620417	-0.450496	0.731791	548997	580451	5.73957	5.76377	0	0.004329	0.0552781	TRUE	FALSE
Urea	Urea	m + 3	13C215N1	Urea (m + 3)	Ratio3To0	Liver	5	6	5	6	0.0459408	0.0618457	0.0458018	0.0600048	-0.428896	0.74283	425757	98367.3	5.62916	4.99285	0	0.004329	0.0552781	TRUE	FALSE
Urea	Urea	m + 3	13C215N1	Urea (m + 3)	Ratio3To0	Heart	5	6	5	6	0.0460061	0.0609321	0.0470104	0.0601424	-0.405376	0.75504	472799	86594.7	5.67468	4.93749	2	0.017316	0.116532	TRUE	FALSE
Urea	Urea	m + 3	13C215N1	Urea (m + 3)	Ratio3To0	Muscle	5	6	5	6	0.0461055	0.0584606	0.0467348	0.0598752	-0.342526	0.788659	367137	83132.5	5.56483	4.91977	0	0.004329	0.0552781	TRUE	FALSE
Urea	Urea	m + 3	13C215N1	Urea (m + 3)	Ratio3To0	Brain	5	6	5	6	0.0487293	0.0674479	0.0471705	0.0631736	-0.468983	0.722474	508951	179399	5.70668	5.25382	0	0.004329	0.0552781	TRUE	FALSE
Urea	Urea	m + 3	13C215N1	Urea (m + 3)	Ratio3To0	Lung	5	6	5	6	0.0465228	0.0688929	0.046636	0.0683936	-0.566416	0.675292	526976	143314	5.72179	5.15629	0	0.004329	0.0552781	TRUE	FALSE
Urea	Urea	m + 3	13C215N1	Urea (m + 3)	Ratio3To0	Spleen	5	6	5	6	0.0458579	0.0593283	0.0464481	0.0564527	-0.371552	0.772951	379260	73356.8	5.57894	4.86544	3	0.030303	0.157197	TRUE	FALSE
Urea	Urea	m + 3	13C215N1	Urea (m + 3)	Ratio3To0	Duodenum	5	6	5	6	0.0495387	0.0887444	0.0507284	0.0900263	-0.841099	0.558218	331593	56867.7	5.52061	4.75487	0	0.004329	0.0552781	TRUE	FALSE
Urea	Urea	m + 3	13C215N1	Urea (m + 3)	Ratio3To0	Jejunum	5	6	5	6	0.0488677	0.0706212	0.049023	0.0659419	-0.531219	0.69197	602196	106275	5.77974	5.02643	1	0.00865801	0.0817734	TRUE	FALSE
Urea	Urea	m + 3	13C215N1	Urea (m + 3)	Ratio3To0	Ileum	5	6	5	6	0.0472679	0.065336	0.0484314	0.0622402	-0.467018	0.723459	262837	78378.1	5.41969	4.89419	0	0.004329	0.0552781	TRUE	FALSE
Urea	Urea	m + 3	13C215N1	Urea (m + 3)	Ratio3To0	Colon	5	6	5	6	0.0471172	0.064142	0.0483105	0.0637352	-0.445015	0.734577	545661	74875.3	5.73692	4.87434	0	0.004329	0.0552781	TRUE	FALSE
Urea	Urea	m + 3	13C215N1	Urea (m + 3)	Ratio3To0	Erythrocytes	5	6	5	6	0.0455192	0.0634339	0.0461194	0.0616732	-0.478781	0.717584	759245	446319	5.88038	5.64965	0	0.004329	0.0552781	TRUE	FALSE
Urea	Urea	m + 3	13C215N1	Urea (m + 3)	Ratio3To0	Plasma	5	6	5	6	0.0436764	0.0626503	0.0445187	0.0611181	-0.520467	0.697146	961194	815186	5.98281	5.91126	0	0.004329	0.0552781	TRUE	FALSE
Urea	Urea	m + 3	13C215N1	Urea (m + 3)	Ratio3To0	Urine	4	6	4	6	0.0462958	0.0673786	0.0473172	0.0645579	-0.541408	0.6871	4.16239e+06	5.44481e+06	6.61934	6.73598	0	0.00952381	0.0817734	TRUE	FALSE
Citrulline	Citr	m + 7	13C515N2	Citr (m + 7)	Ratio7To0	Cortex	5	6	5	6	0.0179709	0.0144326	0.0175676	0.01384	0.316336	1.24516	3440.31	550.394	3.5366	2.74067	20	0.428571	0.662822	FALSE	FALSE
Citrulline	Citr	m + 7	13C515N2	Citr (m + 7)	Ratio7To0	Medulla	5	6	5	6	0.0154055	0.0112342	0.0154942	0.0114106	0.455544	1.3713	6961.53	1003.96	3.8427	3.00172	23	0.177489	0.45328	FALSE	FALSE
Citrulline	Citr	m + 7	13C515N2	Citr (m + 7)	Ratio7To0	Liver	5	6	5	6	0.0536815	0.0356959	0.0604647	0.0348999	0.588667	1.50386	6117.06	1026.85	3.78654	3.01151	24	0.125541	0.390747	FALSE	FALSE
Citrulline	Citr	m + 7	13C515N2	Citr (m + 7)	Ratio7To0	Heart	5	6	5	6	0.0162496	0.0131301	0.0157544	0.0136061	0.307524	1.23758	13033.3	3721.31	4.11505	3.5707	20	0.428571	0.662822	FALSE	FALSE
Citrulline	Citr	m + 7	13C515N2	Citr (m + 7)	Ratio7To0	Muscle	5	6	5	6	0.0141228	0.0113902	0.0137893	0.0116985	0.310234	1.23991	4342.75	2150.02	3.63776	3.33244	20	0.428571	0.662822	FALSE	FALSE
Citrulline	Citr	m + 7	13C515N2	Citr (m + 7)	Ratio7To0	Brain	5	6	5	6	0.0119861	0.00911998	0.0123836	0.0095454	0.394258	1.31427	2824.13	2044.93	3.45089	3.31068	24	0.125541	0.390747	FALSE	FALSE
Citrulline	Citr	m + 7	13C515N2	Citr (m + 7)	Ratio7To0	Lung	5	6	5	6	0.0164109	0.0129597	0.0167284	0.0127491	0.340618	1.2663	2944.25	931.287	3.46897	2.96908	22	0.246753	0.509888	FALSE	FALSE
Citrulline	Citr	m + 7	13C515N2	Citr (m + 7)	Ratio7To0	Spleen	5	6	5	6	0.0150773	0.0114336	0.0158617	0.0116485	0.399104	1.31869	3852.78	1279.89	3.58577	3.10717	21	0.329004	0.602368	FALSE	FALSE
Citrulline	Citr	m + 7	13C515N2	Citr (m + 7)	Ratio7To0	Duodenum	5	6	5	6	0.0146615	0.0114243	0.0139548	0.010991	0.359924	1.28336	5065.28	2306.88	3.7046	3.36303	23	0.177489	0.45328	FALSE	FALSE
Citrulline	Citr	m + 7	13C515N2	Citr (m + 7)	Ratio7To0	Jejunum	5	6	5	6	0.0142735	0.00938618	0.0115898	0.00921046	0.604731	1.5207	3861.51	1501.9	3.58676	3.17664	25	0.0822511	0.294684	FALSE	FALSE
Citrulline	Citr	m + 7	13C515N2	Citr (m + 7)	Ratio7To0	Ileum	5	6	5	6	0.0130637	0.00814663	0.0112999	0.00815402	0.681283	1.60357	4430.74	1495.43	3.64648	3.17477	30	0.004329	0.0552781	TRUE	FALSE
Citrulline	Citr	m + 7	13C515N2	Citr (m + 7)	Ratio7To0	Colon	5	6	5	6	0.0147758	0.0125933	0.0134442	0.0121828	0.230578	1.1733	8025.27	1707.48	3.90446	3.23236	19	0.536797	0.742569	FALSE	FALSE
Citrulline	Citr	m + 7	13C515N2	Citr (m + 7)	Ratio7To0	Erythrocytes	5	6	5	6	0.0146647	0.0113846	0.0153223	0.0115128	0.365267	1.28812	6480.86	1311.96	3.81163	3.11792	20	0.428571	0.662822	FALSE	FALSE
Citrulline	Citr	m + 7	13C515N2	Citr (m + 7)	Ratio7To0	Plasma	5	6	5	6	0.012809	0.00898777	0.0124108	0.00805706	0.511122	1.42516	8040.86	2698.58	3.9053	3.43114	23	0.177489	0.45328	FALSE	FALSE
Citrulline	Citr	m + 7	13C515N2	Citr (m + 7)	Ratio7To0	Urine	4	6	4	6	0.0253184	0.120266	0.0199255	0.108822	-2.24797	0.21052	43803.6	4989.83	4.64151	3.69809	1	0.0190476	0.121612	TRUE	FALSE
Argininosuccinate	ArgSuc	m + 7	13C515N2	ArgSuc (m + 7)	Ratio7To0	Cortex	5	6	5	6	0.464986	0.337977	0.421493	0.317235	0.460262	1.37579	8638.76	3252.55	3.93645	3.51222	23	0.177489	0.45328	FALSE	FALSE
Argininosuccinate	ArgSuc	m + 7	13C515N2	ArgSuc (m + 7)	Ratio7To0	Medulla	5	6	5	6	0.479326	0.36836	0.438758	0.343665	0.379891	1.30124	4087.9	4083.58	3.6115	3.61104	22	0.246753	0.509888	FALSE	FALSE
Argininosuccinate	ArgSuc	m + 7	13C515N2	ArgSuc (m + 7)	Ratio7To0	Liver	5	6	5	6	1.81496	1.28788	1.88362	1.25443	0.494935	1.40926	1028.17	785.143	3.01207	2.89495	23	0.177489	0.45328	FALSE	FALSE
Argininosuccinate	ArgSuc	m + 7	13C515N2	ArgSuc (m + 7)	Ratio7To0	Heart	5	6	5	6	0.237229	0.267855	0.227318	0.265617	-0.175169	0.885664	1419.71	1397.95	3.1522	3.14549	9	0.329004	0.602368	FALSE	FALSE
Argininosuccinate	ArgSuc	m + 7	13C515N2	ArgSuc (m + 7)	Ratio7To0	Muscle	5	6	5	6	0.20718	0.240093	0.185967	0.230452	-0.21271	0.862915	1435.03	3927.4	3.15686	3.59411	7	0.177489	0.45328	FALSE	FALSE
Argininosuccinate	ArgSuc	m + 7	13C515N2	ArgSuc (m + 7)	Ratio7To0	Brain	5	6	5	6	0.15215	0.13246	0.161778	0.131113	0.199935	1.14865	727.847	650.663	2.86204	2.81336	24	0.125541	0.390747	FALSE	FALSE
Argininosuccinate	ArgSuc	m + 7	13C515N2	ArgSuc (m + 7)	Ratio7To0	Lung	5	6	5	6	0.197479	0.197947	0.191368	0.199508	-0.00341693	0.997634	558.986	465.023	2.7474	2.66747	13	0.792208	0.882594	FALSE	FALSE
Argininosuccinate	ArgSuc	m + 7	13C515N2	ArgSuc (m + 7)	Ratio7To0	Spleen	5	6	5	6	0.308341	0.27638	0.274179	0.270647	0.157872	1.11564	853.242	865.216	2.93107	2.93712	17	0.792208	0.882594	FALSE	FALSE
Argininosuccinate	ArgSuc	m + 7	13C515N2	ArgSuc (m + 7)	Ratio7To0	Duodenum	5	6	5	6	0.308673	0.356501	0.248983	0.351201	-0.207827	0.865841	1112.97	1053.4	3.04648	3.02259	9	0.329004	0.602368	FALSE	FALSE
Argininosuccinate	ArgSuc	m + 7	13C515N2	ArgSuc (m + 7)	Ratio7To0	Jejunum	5	6	5	6	0.275576	0.260745	0.217313	0.248328	0.0798089	1.05688	1322.57	809.72	3.12142	2.90833	14	0.930736	0.969679	FALSE	FALSE
Argininosuccinate	ArgSuc	m + 7	13C515N2	ArgSuc (m + 7)	Ratio7To0	Ileum	5	6	5	6	0.280499	0.292394	0.241836	0.254021	-0.0599212	0.959316	1069.19	1730.53	3.02906	3.23818	11	0.536797	0.742569	FALSE	FALSE
Argininosuccinate	ArgSuc	m + 7	13C515N2	ArgSuc (m + 7)	Ratio7To0	Colon	5	6	5	6	0.273112	0.256211	0.221437	0.263652	0.0921602	1.06597	935.634	493.727	2.97111	2.69349	13	0.792208	0.882594	FALSE	FALSE
Argininosuccinate	ArgSuc	m + 7	13C515N2	ArgSuc (m + 7)	Ratio7To0	Erythrocytes	5	6	5	6	0.236227	0.229208	0.196871	0.226425	0.0435152	1.03062	263.355	140.193	2.42054	2.14673	13	0.792208	0.882594	FALSE	FALSE
Argininosuccinate	ArgSuc	m + 7	13C515N2	ArgSuc (m + 7)	Ratio7To0	Plasma	5	6	5	6	0.346826	0.251588	0.295559	0.236982	0.463153	1.37855	289.805	106.816	2.46211	2.02864	21	0.329004	0.602368	FALSE	FALSE
Argininosuccinate	ArgSuc	m + 7	13C515N2	ArgSuc (m + 7)	Ratio7To0	Urine	4	6	4	6	0.335367	0.239306	0.344142	0.266062	0.486889	1.40142	18039.3	5089.7	4.25622	3.70669	19	0.171429	0.45328	FALSE	FALSE
Arginine	Arg	m + 7	13C515N2	Arg (m + 7)	Ratio7To0	Cortex	5	6	5	6	0.459472	0.345004	0.412872	0.334297	0.413361	1.33179	1.80903e+06	1.04467e+06	6.25745	6.01898	22	0.246753	0.509888	FALSE	FALSE
Arginine	Arg	m + 7	13C515N2	Arg (m + 7)	Ratio7To0	Medulla	5	6	5	6	0.427006	0.293971	0.388827	0.292143	0.53858	1.45254	1.21032e+06	903211	6.0829	5.95579	27	0.030303	0.157197	TRUE	FALSE
Arginine	Arg	m + 7	13C515N2	Arg (m + 7)	Ratio7To0	Liver	5	6	5	6	0.215544	0.14998	0.237557	0.150931	0.52321	1.43715	11800.2	6342.47	4.07189	3.80226	25	0.0822511	0.294684	FALSE	FALSE
Arginine	Arg	m + 7	13C515N2	Arg (m + 7)	Ratio7To0	Heart	5	6	5	6	0.211632	0.253623	0.17638	0.245422	-0.261126	0.834436	586571	587264	5.76832	5.76883	8	0.246753	0.509888	FALSE	FALSE
Arginine	Arg	m + 7	13C515N2	Arg (m + 7)	Ratio7To0	Muscle	5	6	5	6	0.193005	0.231185	0.160675	0.223946	-0.260411	0.83485	676023	1.16221e+06	5.82996	6.06528	7	0.177489	0.45328	FALSE	FALSE
Arginine	Arg	m + 7	13C515N2	Arg (m + 7)	Ratio7To0	Brain	5	6	5	6	0.108411	0.107737	0.107549	0.111862	0.00900453	1.00626	297816	329057	5.47395	5.51727	15	1	1	FALSE	FALSE
Arginine	Arg	m + 7	13C515N2	Arg (m + 7)	Ratio7To0	Lung	5	6	5	6	0.216352	0.237907	0.189244	0.230426	-0.137017	0.909398	518979	454011	5.71515	5.65707	11	0.536797	0.742569	FALSE	FALSE
Arginine	Arg	m + 7	13C515N2	Arg (m + 7)	Ratio7To0	Spleen	5	6	5	6	0.26944	0.271885	0.237544	0.25985	-0.0130315	0.991008	568290	612007	5.75457	5.78676	14	0.930736	0.969679	FALSE	FALSE
Arginine	Arg	m + 7	13C515N2	Arg (m + 7)	Ratio7To0	Duodenum	5	6	5	6	0.29637	0.356599	0.25736	0.346164	-0.266904	0.831101	711768	718795	5.85234	5.85661	6	0.125541	0.390747	FALSE	FALSE
Arginine	Arg	m + 7	13C515N2	Arg (m + 7)	Ratio7To0	Jejunum	5	6	5	6	0.287543	0.303842	0.232869	0.286293	-0.0795439	0.946357	978262	706461	5.99045	5.84909	10	0.428571	0.662822	FALSE	FALSE
Arginine	Arg	m + 7	13C515N2	Arg (m + 7)	Ratio7To0	Ileum	5	6	5	6	0.284878	0.301177	0.238523	0.304146	-0.0802679	0.945882	642613	731232	5.80795	5.86406	9	0.329004	0.602368	FALSE	FALSE
Arginine	Arg	m + 7	13C515N2	Arg (m + 7)	Ratio7To0	Colon	5	6	5	6	0.245244	0.255839	0.209409	0.244811	-0.0610213	0.958585	389879	388927	5.59093	5.58987	10	0.428571	0.662822	FALSE	FALSE
Arginine	Arg	m + 7	13C515N2	Arg (m + 7)	Ratio7To0	Erythrocytes	5	6	5	6	0.193624	0.234992	0.188842	0.225596	-0.279357	0.823958	616401	544961	5.78986	5.73637	5	0.0822511	0.294684	FALSE	FALSE
Arginine	Arg	m + 7	13C515N2	Arg (m + 7)	Ratio7To0	Plasma	5	6	5	6	0.292559	0.308734	0.267046	0.294154	-0.0776366	0.947609	881053	923289	5.945	5.96534	11	0.536797	0.742569	FALSE	FALSE
Arginine	Arg	m + 7	13C515N2	Arg (m + 7)	Ratio7To0	Urine	4	6	4	6	0.426155	0.445832	0.399927	0.408465	-0.0651226	0.955864	359465	83970.3	5.55566	4.92413	13	0.914286	0.969679	FALSE	FALSE
Asymmetric dimethylarginine	ADMA	m + 7	13C515N2	ADMA (m + 7)	Ratio7To0	Cortex	5	6	5	6	0.26718	0.315133	0.252255	0.31156	-0.238151	0.847831	304579	311036	5.4837	5.49281	7	0.177489	0.45328	FALSE	FALSE
Asymmetric dimethylarginine	ADMA	m + 7	13C515N2	ADMA (m + 7)	Ratio7To0	Medulla	5	6	5	6	0.254839	0.267892	0.23054	0.269891	-0.0720658	0.951275	221923	307694	5.3462	5.48812	12	0.662338	0.822554	FALSE	FALSE
Asymmetric dimethylarginine	ADMA	m + 7	13C515N2	ADMA (m + 7)	Ratio7To0	Liver	5	6	5	6	0.352057	0.513729	0.353432	0.462084	-0.545197	0.685298	191117	195488	5.2813	5.29112	3	0.030303	0.157197	TRUE	FALSE
Asymmetric dimethylarginine	ADMA	m + 7	13C515N2	ADMA (m + 7)	Ratio7To0	Heart	5	6	5	6	0.245555	0.279417	0.208906	0.266989	-0.186373	0.878813	162034	104399	5.20961	5.0187	9	0.329004	0.602368	FALSE	FALSE
Asymmetric dimethylarginine	ADMA	m + 7	13C515N2	ADMA (m + 7)	Ratio7To0	Muscle	5	6	5	6	0.24433	0.275115	0.216649	0.262272	-0.171205	0.8881	145544	146625	5.16299	5.16621	10	0.428571	0.662822	FALSE	FALSE
Asymmetric dimethylarginine	ADMA	m + 7	13C515N2	ADMA (m + 7)	Ratio7To0	Brain	5	6	5	6	0.104326	0.105111	0.111003	0.106211	-0.0108249	0.992525	22726.6	16727.9	4.35654	4.22344	19	0.536797	0.742569	FALSE	FALSE
Asymmetric dimethylarginine	ADMA	m + 7	13C515N2	ADMA (m + 7)	Ratio7To0	Lung	5	6	5	6	0.233547	0.260745	0.201552	0.258586	-0.15893	0.895689	124380	133968	5.09475	5.127	10	0.428571	0.662822	FALSE	FALSE
Asymmetric dimethylarginine	ADMA	m + 7	13C515N2	ADMA (m + 7)	Ratio7To0	Spleen	5	6	5	6	0.269858	0.301285	0.239448	0.288741	-0.158928	0.89569	215233	204520	5.33291	5.31074	10	0.428571	0.662822	FALSE	FALSE
Asymmetric dimethylarginine	ADMA	m + 7	13C515N2	ADMA (m + 7)	Ratio7To0	Duodenum	5	6	5	6	0.269301	0.309154	0.232568	0.300769	-0.199106	0.87109	114562	81637.1	5.05904	4.91189	9	0.329004	0.602368	FALSE	FALSE
Asymmetric dimethylarginine	ADMA	m + 7	13C515N2	ADMA (m + 7)	Ratio7To0	Jejunum	5	6	5	6	0.258444	0.28871	0.225363	0.274905	-0.159769	0.895168	94039.8	75560.6	4.97331	4.8783	9	0.329004	0.602368	FALSE	FALSE
Asymmetric dimethylarginine	ADMA	m + 7	13C515N2	ADMA (m + 7)	Ratio7To0	Ileum	5	6	5	6	0.268093	0.301281	0.235337	0.29662	-0.168378	0.889842	80415.1	76086.5	4.90534	4.88131	8	0.246753	0.509888	FALSE	FALSE
Asymmetric dimethylarginine	ADMA	m + 7	13C515N2	ADMA (m + 7)	Ratio7To0	Colon	5	6	5	6	0.249225	0.286026	0.215502	0.271927	-0.198695	0.871338	67802.6	64096.1	4.83125	4.80683	6	0.125541	0.390747	FALSE	FALSE
Asymmetric dimethylarginine	ADMA	m + 7	13C515N2	ADMA (m + 7)	Ratio7To0	Erythrocytes	5	6	5	6	0.218398	0.23306	0.197329	0.22874	-0.093742	0.937089	96726.9	50934.8	4.98555	4.70701	9	0.329004	0.602368	FALSE	FALSE
Asymmetric dimethylarginine	ADMA	m + 7	13C515N2	ADMA (m + 7)	Ratio7To0	Plasma	5	6	5	6	0.2577	0.299955	0.219918	0.288104	-0.219055	0.859128	158500	142788	5.20003	5.15469	9	0.329004	0.602368	FALSE	FALSE
Asymmetric dimethylarginine	ADMA	m + 7	13C515N2	ADMA (m + 7)	Ratio7To0	Urine	4	6	4	6	0.231872	0.292804	0.218165	0.27821	-0.336608	0.791901	967478	1.93599e+06	5.98564	6.2869	4	0.114286	0.390747	FALSE	FALSE
Citrulline	Citr	m + 9	13C615N3	Citr (m + 9)	Ratio9To0	Cortex	5	6	5	6	0.0605656	0.0776008	0.040961	0.0786757	-0.357572	0.780477	10727.4	3119.84	4.03049	3.49413	8	0.246753	0.509888	FALSE	FALSE
Citrulline	Citr	m + 9	13C615N3	Citr (m + 9)	Ratio9To0	Medulla	5	6	5	6	0.0523938	0.0571845	0.0369385	0.0562633	-0.126229	0.916223	22521.4	5175.72	4.3526	3.71397	10	0.428571	0.662822	FALSE	FALSE
Citrulline	Citr	m + 9	13C615N3	Citr (m + 9)	Ratio9To0	Liver	5	6	5	6	0.014753	0.00908761	0.0130992	0.0091753	0.699037	1.62342	1223.55	283.032	3.08762	2.45184	21	0.329004	0.602368	FALSE	FALSE
Citrulline	Citr	m + 9	13C615N3	Citr (m + 9)	Ratio9To0	Heart	5	6	5	6	0.0479669	0.0357456	0.0334842	0.0356693	0.424273	1.3419	36165.2	10149	4.55829	4.00642	16	0.930736	0.969679	FALSE	FALSE
Citrulline	Citr	m + 9	13C615N3	Citr (m + 9)	Ratio9To0	Muscle	5	6	5	6	0.0482576	0.0412991	0.0345962	0.0377508	0.224647	1.16849	13138.6	7883.61	4.11855	3.89672	13	0.792208	0.882594	FALSE	FALSE
Citrulline	Citr	m + 9	13C615N3	Citr (m + 9)	Ratio9To0	Brain	5	6	5	6	0.0997506	0.152778	0.0701009	0.152579	-0.615042	0.652911	22440.5	34342.7	4.35103	4.53583	5	0.0822511	0.294684	FALSE	FALSE
Citrulline	Citr	m + 9	13C615N3	Citr (m + 9)	Ratio9To0	Lung	5	6	5	6	0.0459304	0.0380683	0.0349831	0.0376243	0.270859	1.20653	7493.41	2705.95	3.87468	3.43232	14	0.930736	0.969679	FALSE	FALSE
Citrulline	Citr	m + 9	13C615N3	Citr (m + 9)	Ratio9To0	Spleen	5	6	5	6	0.0463958	0.0384624	0.0356892	0.0360821	0.270543	1.20626	10935.6	4352.69	4.03884	3.63876	15	1	1	FALSE	FALSE
Citrulline	Citr	m + 9	13C615N3	Citr (m + 9)	Ratio9To0	Duodenum	5	6	5	6	0.025141	0.0112298	0.0231082	0.0113049	1.16271	2.23877	8357.22	2299.56	3.92206	3.36164	25	0.0822511	0.294684	FALSE	FALSE
Citrulline	Citr	m + 9	13C615N3	Citr (m + 9)	Ratio9To0	Jejunum	5	6	5	6	0.0309457	0.0135131	0.0228047	0.0110513	1.19538	2.29005	6937.19	2437.8	3.84118	3.387	23	0.177489	0.45328	FALSE	FALSE
Citrulline	Citr	m + 9	13C615N3	Citr (m + 9)	Ratio9To0	Ileum	5	6	5	6	0.0354596	0.0196864	0.0299612	0.0165817	0.848973	1.80122	11589.2	3804.88	4.06405	3.58034	25	0.0822511	0.294684	FALSE	FALSE
Citrulline	Citr	m + 9	13C615N3	Citr (m + 9)	Ratio9To0	Colon	5	6	5	6	0.0887849	0.127495	0.0482405	0.112487	-0.522052	0.696381	39458.5	17584.5	4.59614	4.24513	10	0.428571	0.662822	FALSE	FALSE
Citrulline	Citr	m + 9	13C615N3	Citr (m + 9)	Ratio9To0	Erythrocytes	5	6	5	6	0.0455948	0.029291	0.0286994	0.0302894	0.63841	1.55661	17897.2	3392.6	4.25279	3.53053	17	0.792208	0.882594	FALSE	FALSE
Citrulline	Citr	m + 9	13C615N3	Citr (m + 9)	Ratio9To0	Plasma	5	6	5	6	0.037815	0.0251427	0.0275521	0.0240387	0.588819	1.50402	22042.1	7619.86	4.34325	3.88195	20	0.428571	0.662822	FALSE	FALSE
Citrulline	Citr	m + 9	13C615N3	Citr (m + 9)	Ratio9To0	Urine	4	6	4	6	0.0397981	0.0834626	0.031679	0.0762674	-1.06843	0.476837	89467.8	3361.6	4.95167	3.52655	3	0.0666667	0.283761	FALSE	FALSE
Arginine	Arg	m + 9	13C615N3	Arg (m + 9)	Ratio9To0	Cortex	5	6	5	6	0.0399052	0.0431242	0.0299922	0.0421611	-0.111919	0.925356	152143	129727	5.18225	5.11303	12	0.662338	0.822554	FALSE	FALSE
Arginine	Arg	m + 9	13C615N3	Arg (m + 9)	Ratio9To0	Medulla	5	6	5	6	0.0405796	0.0424064	0.0301868	0.0430316	-0.0635272	0.956922	111358	129346	5.04672	5.11175	12	0.662338	0.822554	FALSE	FALSE
Arginine	Arg	m + 9	13C615N3	Arg (m + 9)	Ratio9To0	Liver	5	6	5	6	0.240054	0.0767061	0.173377	0.0858582	1.64594	3.12953	11944.3	3173.38	4.07716	3.50152	29	0.00865801	0.0817734	TRUE	FALSE
Arginine	Arg	m + 9	13C615N3	Arg (m + 9)	Ratio9To0	Heart	5	6	5	6	0.0364808	0.0352574	0.0266463	0.0338326	0.0492129	1.0347	99103.6	81043.6	4.99609	4.90872	12	0.662338	0.822554	FALSE	FALSE
Arginine	Arg	m + 9	13C615N3	Arg (m + 9)	Ratio9To0	Muscle	5	6	5	6	0.0381136	0.0339393	0.0285935	0.032414	0.167347	1.12299	131365	169790	5.11848	5.22991	14	0.930736	0.969679	FALSE	FALSE
Arginine	Arg	m + 9	13C615N3	Arg (m + 9)	Ratio9To0	Brain	5	6	5	6	0.0220702	0.0215172	0.0207865	0.0223778	0.036613	1.0257	60110.4	66560.5	4.77895	4.82322	15	1	1	FALSE	FALSE
Arginine	Arg	m + 9	13C615N3	Arg (m + 9)	Ratio9To0	Lung	5	6	5	6	0.0383283	0.0338163	0.0293475	0.0347307	0.180694	1.13343	88465.7	63526	4.94678	4.80295	14	0.930736	0.969679	FALSE	FALSE
Arginine	Arg	m + 9	13C615N3	Arg (m + 9)	Ratio9To0	Spleen	5	6	5	6	0.042363	0.0355286	0.0296688	0.0331514	0.253822	1.19236	86342.5	79703.4	4.93622	4.90148	15	1	1	FALSE	FALSE
Arginine	Arg	m + 9	13C615N3	Arg (m + 9)	Ratio9To0	Duodenum	5	6	5	6	0.0750894	0.0727343	0.0749557	0.0651808	0.0459718	1.03238	184175	146994	5.26523	5.1673	17	0.792208	0.882594	FALSE	FALSE
Arginine	Arg	m + 9	13C615N3	Arg (m + 9)	Ratio9To0	Jejunum	5	6	5	6	0.0612242	0.0692672	0.061627	0.0464743	-0.178072	0.883884	203809	145954	5.30922	5.16422	17	0.792208	0.882594	FALSE	FALSE
Arginine	Arg	m + 9	13C615N3	Arg (m + 9)	Ratio9To0	Ileum	5	6	5	6	0.0475046	0.0414897	0.0333921	0.0414391	0.195313	1.14497	106008	101441	5.02534	5.00621	14	0.930736	0.969679	FALSE	FALSE
Arginine	Arg	m + 9	13C615N3	Arg (m + 9)	Ratio9To0	Colon	5	6	5	6	0.0418734	0.0396143	0.0296222	0.0388874	0.0800112	1.05703	63438	59878.1	4.80235	4.77727	11	0.536797	0.742569	FALSE	FALSE
Arginine	Arg	m + 9	13C615N3	Arg (m + 9)	Ratio9To0	Erythrocytes	5	6	5	6	0.0315748	0.0322688	0.0277335	0.0306102	-0.0313659	0.978493	98417.9	74516.1	4.99307	4.87225	12	0.662338	0.822554	FALSE	FALSE
Arginine	Arg	m + 9	13C615N3	Arg (m + 9)	Ratio9To0	Plasma	5	6	5	6	0.0474824	0.0379563	0.0411211	0.0366651	0.323053	1.25098	137566	114522	5.13851	5.05889	16	0.930736	0.969679	FALSE	FALSE
Arginine	Arg	m + 9	13C615N3	Arg (m + 9)	Ratio9To0	Urine	4	6	4	6	0.351238	1.1325	0.27019	1.08752	-1.68899	0.310143	282881	218470	5.4516	5.33939	1	0.0190476	0.121612	TRUE	FALSE
Monomethylarginine	MMA	m + 9	13C615N3	MMA (m + 9)	Ratio9To0	Cortex	5	6	5	6	0.065069	0.0299514	0.0600202	0.0291664	1.11935	2.17249	1813.98	1124.36	3.25863	3.0509	29	0.00865801	0.0817734	TRUE	FALSE
Monomethylarginine	MMA	m + 9	13C615N3	MMA (m + 9)	Ratio9To0	Medulla	5	6	5	6	0.0771812	0.0265084	0.0641637	0.0247309	1.5418	2.91157	1474.45	1039.49	3.16863	3.01682	30	0.004329	0.0552781	TRUE	FALSE
Monomethylarginine	MMA	m + 9	13C615N3	MMA (m + 9)	Ratio9To0	Liver	5	6	5	6	0.0383417	0.0336768	0.038881	0.0348482	0.187159	1.13852	777.536	458.162	2.89072	2.66102	18	0.662338	0.822554	FALSE	FALSE
Monomethylarginine	MMA	m + 9	13C615N3	MMA (m + 9)	Ratio9To0	Heart	5	6	5	6	0.0259761	0.0290397	0.0225866	0.0284911	-0.160847	0.8945	927.979	631.342	2.96754	2.80026	13	0.792208	0.882594	FALSE	FALSE
Monomethylarginine	MMA	m + 9	13C615N3	MMA (m + 9)	Ratio9To0	Muscle	5	6	5	6	0.0489144	0.0675615	0.0458555	0.0641593	-0.465942	0.723998	1670.76	3525.12	3.22291	3.54717	7	0.177489	0.45328	FALSE	FALSE
Monomethylarginine	MMA	m + 9	13C615N3	MMA (m + 9)	Ratio9To0	Brain	5	6	5	6	0.00773702	0.00725214	0.00859052	0.0077502	0.0933713	1.06686	104.927	103.41	2.02089	2.01456	19	0.536797	0.742569	FALSE	FALSE
Monomethylarginine	MMA	m + 9	13C615N3	MMA (m + 9)	Ratio9To0	Lung	5	6	5	6	0.023928	0.0227833	0.0214896	0.022521	0.0707248	1.05024	572.634	481.348	2.75788	2.68246	13	0.792208	0.882594	FALSE	FALSE
Monomethylarginine	MMA	m + 9	13C615N3	MMA (m + 9)	Ratio9To0	Spleen	5	6	5	6	0.0629964	0.0606619	0.0496927	0.0603742	0.0544775	1.03848	1133.68	1084.78	3.05449	3.03534	13	0.792208	0.882594	FALSE	FALSE
Monomethylarginine	MMA	m + 9	13C615N3	MMA (m + 9)	Ratio9To0	Duodenum	5	6	5	6	0.148973	0.201584	0.119542	0.200525	-0.436336	0.739009	1632.69	1512.5	3.2129	3.1797	6	0.125541	0.390747	FALSE	FALSE
Monomethylarginine	MMA	m + 9	13C615N3	MMA (m + 9)	Ratio9To0	Jejunum	5	6	5	6	0.0635849	0.0449071	0.0417491	0.0274133	0.50174	1.41592	3649.89	2144	3.56228	3.33122	16	0.930736	0.969679	FALSE	FALSE
Monomethylarginine	MMA	m + 9	13C615N3	MMA (m + 9)	Ratio9To0	Ileum	5	6	5	6	0.706526	0.824859	0.559663	0.800797	-0.223405	0.856542	8284.69	8265.95	3.91828	3.91729	12	0.662338	0.822554	FALSE	FALSE
Monomethylarginine	MMA	m + 9	13C615N3	MMA (m + 9)	Ratio9To0	Colon	5	6	5	6	0.180252	0.056817	0.130994	0.0284956	1.66562	3.17249	3625.16	654.378	3.55933	2.81583	22	0.246753	0.509888	FALSE	FALSE
Monomethylarginine	MMA	m + 9	13C615N3	MMA (m + 9)	Ratio9To0	Erythrocytes	5	6	5	6	0.0332851	0.0258068	0.0324444	0.0260247	0.367128	1.28978	1410.55	1232.92	3.14939	3.09094	22	0.246753	0.509888	FALSE	FALSE
Monomethylarginine	MMA	m + 9	13C615N3	MMA (m + 9)	Ratio9To0	Plasma	5	6	5	6	0.0329218	0.0266357	0.0310153	0.0268069	0.305685	1.23601	3583.83	2668.14	3.55435	3.42621	20	0.428571	0.662822	FALSE	FALSE
Monomethylarginine	MMA	m + 9	13C615N3	MMA (m + 9)	Ratio9To0	Urine	4	6	4	6	0.41879	0.395335	0.0531666	0.212105	0.0831494	1.05933	6009.04	7934.59	3.77881	3.89952	11	0.914286	0.969679	FALSE	FALSE
Proline	Pro	m + 6	13C515N1	Pro (m + 6)	Ratio6To0	Cortex	5	6	5	6	0.0824331	0.0877942	0.0820046	0.0897013	-0.0909006	0.938936	76278.1	49836.9	4.8824	4.69755	8	0.246753	0.509888	FALSE	FALSE
Proline	Pro	m + 6	13C515N1	Pro (m + 6)	Ratio6To0	Medulla	5	6	5	6	0.0866738	0.0958193	0.0843151	0.0953701	-0.14472	0.904555	65694.6	65799.2	4.81753	4.81822	11	0.536797	0.742569	FALSE	FALSE
Proline	Pro	m + 6	13C515N1	Pro (m + 6)	Ratio6To0	Liver	5	6	5	6	0.102709	0.107929	0.103506	0.107109	-0.0715188	0.951636	54175.1	33447.2	4.7338	4.52436	9	0.329004	0.602368	FALSE	FALSE
Proline	Pro	m + 6	13C515N1	Pro (m + 6)	Ratio6To0	Heart	5	6	5	6	0.0807619	0.0875104	0.0763066	0.0877798	-0.11578	0.922883	12939.4	13798.6	4.11191	4.13984	10	0.428571	0.662822	FALSE	FALSE
Proline	Pro	m + 6	13C515N1	Pro (m + 6)	Ratio6To0	Muscle	5	6	5	6	0.0773028	0.0905031	0.0784036	0.0914942	-0.227447	0.854145	26996.6	38671.7	4.43131	4.58739	5	0.0822511	0.294684	FALSE	FALSE
Proline	Pro	m + 6	13C515N1	Pro (m + 6)	Ratio6To0	Brain	5	6	5	6	0.0183926	0.0213686	0.0171704	0.0200804	-0.216366	0.860731	6356.94	5412.45	3.80325	3.73339	8	0.246753	0.509888	FALSE	FALSE
Proline	Pro	m + 6	13C515N1	Pro (m + 6)	Ratio6To0	Lung	5	6	5	6	0.0838781	0.0918487	0.0805039	0.092105	-0.130964	0.913221	28582.2	24325.3	4.4561	4.38606	5	0.0822511	0.294684	FALSE	FALSE
Proline	Pro	m + 6	13C515N1	Pro (m + 6)	Ratio6To0	Spleen	5	6	5	6	0.0698095	0.0668454	0.0672198	0.0672888	0.062595	1.04434	51092.4	46898.8	4.70836	4.67116	19	0.536797	0.742569	FALSE	FALSE
Proline	Pro	m + 6	13C515N1	Pro (m + 6)	Ratio6To0	Duodenum	5	6	5	6	0.0969431	0.0994893	0.08998	0.0993097	-0.0374035	0.974407	78821.4	76306.1	4.89664	4.88256	13	0.792208	0.882594	FALSE	FALSE
Proline	Pro	m + 6	13C515N1	Pro (m + 6)	Ratio6To0	Jejunum	5	6	5	6	0.0879573	0.0918434	0.0830392	0.0929351	-0.0623733	0.957687	76410.1	60217	4.88315	4.77972	10	0.428571	0.662822	FALSE	FALSE
Proline	Pro	m + 6	13C515N1	Pro (m + 6)	Ratio6To0	Ileum	5	6	5	6	0.0784209	0.0683687	0.0750876	0.0683911	0.197903	1.14703	57449.1	53000.6	4.75928	4.72428	22	0.246753	0.509888	FALSE	FALSE
Proline	Pro	m + 6	13C515N1	Pro (m + 6)	Ratio6To0	Colon	5	6	5	6	0.0767768	0.0704553	0.0699214	0.0680752	0.123963	1.08972	42962	33524.7	4.63308	4.52536	22	0.246753	0.509888	FALSE	FALSE
Proline	Pro	m + 6	13C515N1	Pro (m + 6)	Ratio6To0	Erythrocytes	5	6	5	6	0.078776	0.0866115	0.0794528	0.087627	-0.136804	0.909532	20189.6	17244.9	4.30513	4.23666	6	0.125541	0.390747	FALSE	FALSE
Proline	Pro	m + 6	13C515N1	Pro (m + 6)	Ratio6To0	Plasma	5	6	5	6	0.0800211	0.0852517	0.0813643	0.0870651	-0.0913473	0.938646	33401.9	37259.2	4.52377	4.57123	8	0.246753	0.509888	FALSE	FALSE
Proline	Pro	m + 6	13C515N1	Pro (m + 6)	Ratio6To0	Urine	4	6	4	6	0.0978481	0.139458	0.0977638	0.127326	-0.51122	0.701629	9054.84	5240.31	3.95688	3.71936	2	0.0380952	0.193586	TRUE	FALSE
Glutamine	Gln	m + 6	13C515N1	Gln (m + 6)	Ratio6To0	Cortex	5	6	5	6	0.000308369	0.00019641	0.000264976	0.000217261	0.650788	1.57003	1459.86	826.961	3.16431	2.91749	30	0.004329	0.0552781	TRUE	FALSE
Glutamine	Gln	m + 6	13C515N1	Gln (m + 6)	Ratio6To0	Medulla	5	6	5	6	0.000377708	0.000188152	0.00030168	0.00019248	1.00537	2.00746	2347.3	1102.02	3.37057	3.04219	29	0.00865801	0.0817734	TRUE	FALSE
Glutamine	Gln	m + 6	13C515N1	Gln (m + 6)	Ratio6To0	Liver	5	6	5	6	0.00150301	0.00073873	0.00154836	0.000671304	1.02473	2.03459	7941.13	3623.23	3.89988	3.5591	25	0.0822511	0.294684	FALSE	FALSE
Glutamine	Gln	m + 6	13C515N1	Gln (m + 6)	Ratio6To0	Heart	5	6	5	6	0.000265279	0.000172195	0.000202602	0.000179382	0.623471	1.54058	3469.19	1962.07	3.54023	3.29271	21	0.329004	0.602368	FALSE	FALSE
Glutamine	Gln	m + 6	13C515N1	Gln (m + 6)	Ratio6To0	Muscle	5	6	5	6	0.000274157	0.000169845	0.000236744	0.000156944	0.690783	1.61416	1032.28	917.611	3.0138	2.96266	27	0.030303	0.157197	TRUE	FALSE
Glutamine	Gln	m + 6	13C515N1	Gln (m + 6)	Ratio6To0	Brain	5	6	5	6	7.20434e-05	6.01963e-05	7.7152e-05	5.95788e-05	0.25919	1.19681	1253.73	962.953	3.0982	2.98361	23	0.177489	0.45328	FALSE	FALSE
Glutamine	Gln	m + 6	13C515N1	Gln (m + 6)	Ratio6To0	Lung	5	6	5	6	0.000370813	0.000229954	0.000284376	0.000234455	0.689347	1.61255	2410.2	1564.4	3.38205	3.19435	25	0.0822511	0.294684	FALSE	FALSE
Glutamine	Gln	m + 6	13C515N1	Gln (m + 6)	Ratio6To0	Spleen	5	6	5	6	0.000396067	0.00021191	0.000269651	0.000205934	0.902292	1.86903	3055.95	1654.78	3.48515	3.21874	24	0.125541	0.390747	FALSE	FALSE
Glutamine	Gln	m + 6	13C515N1	Gln (m + 6)	Ratio6To0	Duodenum	5	6	5	6	0.000418438	0.000241548	0.000304121	0.000254298	0.792701	1.73231	1356.54	723.013	3.13243	2.85915	25	0.0822511	0.294684	FALSE	FALSE
Glutamine	Gln	m + 6	13C515N1	Gln (m + 6)	Ratio6To0	Jejunum	5	6	5	6	0.000339641	0.000210104	0.00031469	0.000214879	0.692907	1.61654	1182.6	602.215	3.07284	2.77975	28	0.017316	0.116532	TRUE	FALSE
Glutamine	Gln	m + 6	13C515N1	Gln (m + 6)	Ratio6To0	Ileum	5	6	5	6	0.00034131	0.000198744	0.000254405	0.000212537	0.780172	1.71734	1534.41	900.703	3.18594	2.95458	26	0.0519481	0.226931	FALSE	FALSE
Glutamine	Gln	m + 6	13C515N1	Gln (m + 6)	Ratio6To0	Colon	5	6	5	6	0.000300689	0.000174686	0.0002317	0.000172606	0.783513	1.72132	2327.81	1206.63	3.36695	3.08157	27	0.030303	0.157197	TRUE	FALSE
Glutamine	Gln	m + 6	13C515N1	Gln (m + 6)	Ratio6To0	Erythrocytes	5	6	5	6	0.000443614	0.000248853	0.000386342	0.000247379	0.834011	1.78264	1514.41	767.094	3.18024	2.88485	28	0.017316	0.116532	TRUE	FALSE
Glutamine	Gln	m + 6	13C515N1	Gln (m + 6)	Ratio6To0	Plasma	5	6	5	6	0.000610447	0.000357752	0.000484991	0.000310077	0.770905	1.70634	3259.37	2192.12	3.51313	3.34086	25	0.0822511	0.294684	FALSE	FALSE
Glutamine	Gln	m + 6	13C515N1	Gln (m + 6)	Ratio6To0	Urine	4	6	4	6	0.000479315	0.000205148	0.000483868	0.000221683	1.22431	2.33644	724.123	170.197	2.85981	2.23095	24	0.00952381	0.0817734	TRUE	FALSE
Glutamate	Glu	m + 6	13C515N1	Glu (m + 6)	Ratio6To0	Cortex	5	6	5	6	0.000504486	0.00032014	0.000479087	0.000308617	0.656111	1.57583	3537.32	2395.81	3.54867	3.37945	26	0.0519481	0.226931	FALSE	FALSE
Glutamate	Glu	m + 6	13C515N1	Glu (m + 6)	Ratio6To0	Medulla	5	6	5	6	0.000465415	0.00020648	0.000466003	0.000215067	1.17251	2.25404	3141.21	1663.94	3.4971	3.22114	30	0.004329	0.0552781	TRUE	FALSE
Glutamate	Glu	m + 6	13C515N1	Glu (m + 6)	Ratio6To0	Liver	5	6	5	6	0.00125677	0.000761479	0.0012088	0.000795865	0.722847	1.65044	774.307	386.781	2.88891	2.58747	23	0.177489	0.45328	FALSE	FALSE
Glutamate	Glu	m + 6	13C515N1	Glu (m + 6)	Ratio6To0	Heart	5	6	5	6	4.91726e-05	3.45156e-05	5.13234e-05	3.8982e-05	0.510604	1.42465	135.165	111.738	2.13086	2.0482	23	0.177489	0.45328	FALSE	FALSE
Glutamate	Glu	m + 6	13C515N1	Glu (m + 6)	Ratio6To0	Muscle	5	6	5	6	0.000223631	0.000147766	0.000210425	0.000140171	0.597805	1.51341	119.226	105.33	2.07637	2.02255	27	0.030303	0.157197	TRUE	FALSE
Glutamate	Glu	m + 6	13C515N1	Glu (m + 6)	Ratio6To0	Brain	5	6	5	6	4.76992e-05	9.70972e-05	3.13274e-05	9.64313e-05	-1.02547	0.491252	434.034	892.003	2.63752	2.95037	4	0.0519481	0.226931	FALSE	FALSE
Glutamate	Glu	m + 6	13C515N1	Glu (m + 6)	Ratio6To0	Lung	5	6	5	6	0.000209987	0.000153301	0.000211149	0.000159884	0.453935	1.36977	567.255	429.939	2.75378	2.63341	27	0.030303	0.157197	TRUE	FALSE
Glutamate	Glu	m + 6	13C515N1	Glu (m + 6)	Ratio6To0	Spleen	5	6	5	6	0.000235903	0.000166504	0.000237755	0.000155291	0.502639	1.4168	1910.01	1243.7	3.28104	3.09472	26	0.0519481	0.226931	FALSE	FALSE
Glutamate	Glu	m + 6	13C515N1	Glu (m + 6)	Ratio6To0	Duodenum	5	6	5	6	0.000212163	0.000203674	0.000187703	0.000173235	0.0589147	1.04168	915.629	1001.32	2.96172	3.00057	19	0.536797	0.742569	FALSE	FALSE
Glutamate	Glu	m + 6	13C515N1	Glu (m + 6)	Ratio6To0	Jejunum	5	6	5	6	0.000187622	0.000156311	0.000189016	0.000164406	0.263403	1.20031	675.245	520.063	2.82946	2.71606	18	0.662338	0.822554	FALSE	FALSE
Glutamate	Glu	m + 6	13C515N1	Glu (m + 6)	Ratio6To0	Ileum	5	6	5	6	0.000199872	0.000126932	0.000162885	0.000128255	0.655026	1.57464	1022.96	718.919	3.00986	2.85668	27	0.030303	0.157197	TRUE	FALSE
Glutamate	Glu	m + 6	13C515N1	Glu (m + 6)	Ratio6To0	Colon	5	6	5	6	0.000153363	0.000111279	0.000146692	0.000108425	0.462773	1.37819	670.666	429.135	2.82651	2.63259	23	0.177489	0.45328	FALSE	FALSE
Glutamate	Glu	m + 6	13C515N1	Glu (m + 6)	Ratio6To0	Erythrocytes	5	6	5	6	0.000679916	0.000471365	0.000696927	0.00042897	0.528514	1.44244	316.42	151.35	2.50026	2.17998	26	0.0519481	0.226931	FALSE	FALSE
Glutamate	Glu	m + 6	13C515N1	Glu (m + 6)	Ratio6To0	Plasma	5	6	5	6	0.000955863	0.000538389	0.000852232	0.000481751	0.828155	1.77541	345.968	228.262	2.53904	2.35843	27	0.030303	0.157197	TRUE	FALSE
Glutamate	Glu	m + 6	13C515N1	Glu (m + 6)	Ratio6To0	Urine	4	6	4	6	0.00107117	0.000687399	0.00106565	0.000701534	0.639971	1.5583	198.82	76.9358	2.29846	1.88613	24	0.00952381	0.0817734	TRUE	FALSE
Glutamate	Glu	m + 5	13C5	Glu (m + 5)	Ratio5To0	Cortex	5	6	5	6	0.00471491	0.00254659	0.0043863	0.00258641	0.888664	1.85146	33049.9	19612.9	4.51917	4.29254	30	0.004329	0.0552781	TRUE	FALSE
Glutamate	Glu	m + 5	13C5	Glu (m + 5)	Ratio5To0	Medulla	5	6	5	6	0.00458321	0.00229224	0.00439398	0.00229153	0.999601	1.99945	31039.1	18881.2	4.49191	4.27603	30	0.004329	0.0552781	TRUE	FALSE
Glutamate	Glu	m + 5	13C5	Glu (m + 5)	Ratio5To0	Liver	5	6	5	6	0.0110536	0.00880545	0.0113317	0.00946719	0.328042	1.25531	7719.12	4467.94	3.88757	3.65011	25	0.0822511	0.294684	FALSE	FALSE
Glutamate	Glu	m + 5	13C5	Glu (m + 5)	Ratio5To0	Heart	5	6	5	6	0.00064034	0.000516403	0.000685234	0.000556435	0.31034	1.24	1774.74	1672.4	3.24914	3.22334	20	0.428571	0.662822	FALSE	FALSE
Glutamate	Glu	m + 5	13C5	Glu (m + 5)	Ratio5To0	Muscle	5	6	5	6	0.00292384	0.00226788	0.00280425	0.00211054	0.366523	1.28924	1579.75	1597.54	3.19859	3.20345	26	0.0519481	0.226931	FALSE	FALSE
Glutamate	Glu	m + 5	13C5	Glu (m + 5)	Ratio5To0	Brain	5	6	5	6	0.000217221	0.000187066	0.000222229	0.000183023	0.215618	1.1612	2055.26	1772.1	3.31287	3.24849	22	0.246753	0.509888	FALSE	FALSE
Glutamate	Glu	m + 5	13C5	Glu (m + 5)	Ratio5To0	Lung	5	6	5	6	0.00189963	0.0018159	0.00188732	0.00171638	0.0650344	1.04611	5166.37	5148.92	3.71319	3.71172	19	0.536797	0.742569	FALSE	FALSE
Glutamate	Glu	m + 5	13C5	Glu (m + 5)	Ratio5To0	Spleen	5	6	5	6	0.00254006	0.00212367	0.00264588	0.00201827	0.258299	1.19607	20618.8	15832.4	4.31426	4.19955	22	0.246753	0.509888	FALSE	FALSE
Glutamate	Glu	m + 5	13C5	Glu (m + 5)	Ratio5To0	Duodenum	5	6	5	6	0.00254645	0.00253461	0.0022322	0.00212927	0.00672339	1.00467	10985	12584.6	4.0408	4.09984	20	0.428571	0.662822	FALSE	FALSE
Glutamate	Glu	m + 5	13C5	Glu (m + 5)	Ratio5To0	Jejunum	5	6	5	6	0.00239315	0.00203326	0.00242833	0.00210346	0.235122	1.17701	8709.71	6783.8	3.94	3.83147	20	0.428571	0.662822	FALSE	FALSE
Glutamate	Glu	m + 5	13C5	Glu (m + 5)	Ratio5To0	Ileum	5	6	5	6	0.00237775	0.00175179	0.00199542	0.00171475	0.440766	1.35733	12321.9	10075.7	4.09068	4.00328	24	0.125541	0.390747	FALSE	FALSE
Glutamate	Glu	m + 5	13C5	Glu (m + 5)	Ratio5To0	Colon	5	6	5	6	0.00183138	0.00146241	0.00170169	0.00140819	0.324588	1.25231	7956.51	5687.43	3.90072	3.75492	22	0.246753	0.509888	FALSE	FALSE
Glutamate	Glu	m + 5	13C5	Glu (m + 5)	Ratio5To0	Erythrocytes	5	6	5	6	0.004013	0.00392801	0.00373884	0.00401931	0.0308826	1.02164	1751.42	1261.81	3.24339	3.101	18	0.662338	0.822554	FALSE	FALSE
Glutamate	Glu	m + 5	13C5	Glu (m + 5)	Ratio5To0	Plasma	5	6	5	6	0.00614809	0.0049813	0.00541176	0.004557	0.303614	1.23423	2234.42	2107.09	3.34917	3.32368	22	0.246753	0.509888	FALSE	FALSE
Glutamate	Glu	m + 5	13C5	Glu (m + 5)	Ratio5To0	Urine	4	6	4	6	0.00552126	0.00243691	0.0052579	0.00240013	1.17995	2.26568	1106.29	270.07	3.04387	2.43148	24	0.00952381	0.0817734	TRUE	FALSE
Aspartate	Asp	m + 4	13C4	Asp (m + 4)	Ratio4To0	Cortex	5	6	5	6	0.00397814	0.00170366	0.00401018	0.00169497	1.22346	2.33506	2884.41	2833.16	3.46006	3.45227	30	0.004329	0.0552781	TRUE	FALSE
Aspartate	Asp	m + 4	13C4	Asp (m + 4)	Ratio4To0	Medulla	5	6	5	6	0.00391108	0.00166236	0.00406729	0.00186024	1.23434	2.35274	2644.25	1532.44	3.4223	3.18538	30	0.004329	0.0552781	TRUE	FALSE
Aspartate	Asp	m + 4	13C4	Asp (m + 4)	Ratio4To0	Liver	5	6	5	6	0.00371623	0.00342726	0.00334499	0.00327362	0.116787	1.08432	511.578	375.793	2.70891	2.57495	17	0.792208	0.882594	FALSE	FALSE
Aspartate	Asp	m + 4	13C4	Asp (m + 4)	Ratio4To0	Heart	5	6	5	6	0.000359588	0.000344342	0.000404995	0.000365037	0.0625023	1.04428	247.446	328.249	2.39348	2.5162	16	0.930736	0.969679	FALSE	FALSE
Aspartate	Asp	m + 4	13C4	Asp (m + 4)	Ratio4To0	Muscle	5	6	5	6	0.00170399	0.00158205	0.00170485	0.00147592	0.107117	1.07707	81.9348	114.673	1.91347	2.05946	19	0.536797	0.742569	FALSE	FALSE
Aspartate	Asp	m + 4	13C4	Asp (m + 4)	Ratio4To0	Brain	5	6	5	6	0.00021267	0.000178841	0.000222854	0.000176855	0.249941	1.18916	567.257	662.451	2.75378	2.82115	24	0.125541	0.390747	FALSE	FALSE
Aspartate	Asp	m + 4	13C4	Asp (m + 4)	Ratio4To0	Lung	5	6	5	6	0.0019431	0.00197747	0.00191593	0.00185901	-0.0252971	0.982618	867.727	1173.42	2.93838	3.06945	14	0.930736	0.969679	FALSE	FALSE
Aspartate	Asp	m + 4	13C4	Asp (m + 4)	Ratio4To0	Spleen	5	6	5	6	0.00283234	0.00229769	0.00308949	0.00231181	0.301807	1.23269	10031.5	8051.02	4.00136	3.90585	25	0.0822511	0.294684	FALSE	FALSE
Aspartate	Asp	m + 4	13C4	Asp (m + 4)	Ratio4To0	Duodenum	5	6	5	6	0.00246004	0.00245701	0.0023575	0.00217417	0.00177483	1.00123	1514.79	1356.56	3.18035	3.13244	19	0.536797	0.742569	FALSE	FALSE
Aspartate	Asp	m + 4	13C4	Asp (m + 4)	Ratio4To0	Jejunum	5	6	5	6	0.00255253	0.00207188	0.0023132	0.00222283	0.300985	1.23199	1394.19	971.6	3.14432	2.98749	19	0.536797	0.742569	FALSE	FALSE
Aspartate	Asp	m + 4	13C4	Asp (m + 4)	Ratio4To0	Ileum	5	6	5	6	0.00252285	0.00208981	0.00229796	0.00202988	0.271688	1.20722	2187.85	2002.15	3.34002	3.3015	23	0.177489	0.45328	FALSE	FALSE
Aspartate	Asp	m + 4	13C4	Asp (m + 4)	Ratio4To0	Colon	5	6	5	6	0.00182997	0.00163747	0.00164178	0.0016875	0.160354	1.11756	1197.88	825.774	3.07841	2.91686	19	0.536797	0.742569	FALSE	FALSE
Aspartate	Asp	m + 4	13C4	Asp (m + 4)	Ratio4To0	Erythrocytes	5	6	5	6	0.00264442	0.00176061	0.00276006	0.00173182	0.586873	1.50199	184.496	44.9377	2.26599	1.65261	23	0.177489	0.45328	FALSE	FALSE
Aspartate	Asp	m + 4	13C4	Asp (m + 4)	Ratio4To0	Plasma	5	6	5	6	0.0021439	0.00132809	0.00215104	0.00107824	0.690887	1.61428	5.70078	4.45623	0.755935	0.648968	22	0.246753	0.509888	FALSE	FALSE
Aspartate	Asp	m + 4	13C4	Asp (m + 4)	Ratio4To0	Urine	4	6	4	6	0.00200551	0.00254748	0.00194711	0.00300235	-0.345104	0.787251	32.6137	14.5974	1.5134	1.16428	8	0.47619	0.734188	FALSE	FALSE
Aspartate	Asp	m + 5	13C415N1	Asp (m + 5)	Ratio5To0	Cortex	5	6	5	6	0.000293748	0.000145235	0.000272887	0.000141339	1.01619	2.02257	210.357	243.631	2.32296	2.38673	29	0.00865801	0.0817734	TRUE	FALSE
Aspartate	Asp	m + 5	13C415N1	Asp (m + 5)	Ratio5To0	Medulla	5	6	5	6	0.0003655	0.000127349	0.000387794	0.000136721	1.52108	2.87006	245.713	118.877	2.39043	2.0751	30	0.004329	0.0552781	TRUE	FALSE
Aspartate	Asp	m + 5	13C415N1	Asp (m + 5)	Ratio5To0	Liver	5	6	5	6	0.000760179	0.00167876	0.000852086	0.00143065	-1.14298	0.452823	102.64	217.376	2.01132	2.33721	10	0.428571	0.662822	FALSE	FALSE
Aspartate	Asp	m + 5	13C415N1	Asp (m + 5)	Ratio5To0	Heart	5	6	5	6	3.14456e-05	6.89774e-05	3.51225e-05	6.77299e-05	-1.13327	0.455882	22.0987	58.3049	1.34437	1.76571	0	0.004329	0.0552781	TRUE	FALSE
Aspartate	Asp	m + 5	13C415N1	Asp (m + 5)	Ratio5To0	Muscle	5	6	5	6	0.000355472	0.000314888	0.000435128	0.000300898	0.174899	1.12889	15.2069	20.2003	1.18204	1.30536	14	0.930736	0.969679	FALSE	FALSE
Aspartate	Asp	m + 5	13C415N1	Asp (m + 5)	Ratio5To0	Brain	5	6	5	6	2.03752e-05	1.32447e-05	2.05104e-05	1.4253e-05	0.621403	1.53837	53.2492	49.6717	1.72631	1.69611	27	0.030303	0.157197	TRUE	FALSE
Aspartate	Asp	m + 5	13C415N1	Asp (m + 5)	Ratio5To0	Lung	5	6	5	6	0.000350299	0.00043786	0.000373025	0.000442132	-0.321883	0.800025	149.057	270.538	2.17335	2.43223	8	0.246753	0.509888	FALSE	FALSE
Aspartate	Asp	m + 5	13C415N1	Asp (m + 5)	Ratio5To0	Spleen	5	6	5	6	0.000237172	0.000301682	0.000254612	0.000277177	-0.347094	0.786166	840.522	1049.72	2.92455	3.02108	4	0.0519481	0.226931	FALSE	FALSE
Aspartate	Asp	m + 5	13C415N1	Asp (m + 5)	Ratio5To0	Duodenum	5	6	5	6	0.000409075	0.000570133	0.000304823	0.000506766	-0.478933	0.717508	251.341	300.585	2.40026	2.47797	6	0.125541	0.390747	FALSE	FALSE
Aspartate	Asp	m + 5	13C415N1	Asp (m + 5)	Ratio5To0	Jejunum	5	6	5	6	0.000957012	0.000916028	0.000839988	0.000892948	0.0631457	1.04474	503.066	402.516	2.70162	2.60478	13	0.792208	0.882594	FALSE	FALSE
Aspartate	Asp	m + 5	13C415N1	Asp (m + 5)	Ratio5To0	Ileum	5	6	5	6	0.000521694	0.000661954	0.000517968	0.000742099	-0.343528	0.788112	466.838	635.662	2.66917	2.80323	8	0.246753	0.509888	FALSE	FALSE
Aspartate	Asp	m + 5	13C415N1	Asp (m + 5)	Ratio5To0	Colon	5	6	5	6	0.000164796	0.000128785	0.000170599	0.000137226	0.35572	1.27962	105.115	65.0204	2.02166	1.81305	21	0.329004	0.602368	FALSE	FALSE
Aspartate	Asp	m + 5	13C415N1	Asp (m + 5)	Ratio5To0	Erythrocytes	5	6	5	6	0.000524035	0.000522049	0.000331593	0.000521557	0.00547751	1.0038	22.8454	10.7146	1.3588	1.02998	12	0.662338	0.822554	FALSE	FALSE
Aspartate	Asp	m + 5	13C415N1	Asp (m + 5)	Ratio5To0	Plasma	5	6	5	6	0.00380508	0.00474788	0.00496874	0.00322259	-0.319356	0.801428	7.98993	13.8062	0.902543	1.14007	13	0.792208	0.882594	FALSE	FALSE
Aspartate	Asp	m + 5	13C415N1	Asp (m + 5)	Ratio5To0	Urine	4	6	4	6	0.00356368	0.00458966	0.00365806	0.00395602	-0.365018	0.776459	50.5322	25.1942	1.70357	1.4013	10	0.761905	0.882594	FALSE	FALSE
Aspartate	Asp	m + 1	15N1	Asp (m + 1)	Ratio1To0	Cortex	5	6	5	6	0.11183	0.104161	0.11214	0.104683	0.102487	1.07362	82236	179300	4.91506	5.25358	25	0.0822511	0.294684	FALSE	FALSE
Aspartate	Asp	m + 1	15N1	Asp (m + 1)	Ratio1To0	Medulla	5	6	5	6	0.111388	0.100356	0.111651	0.10237	0.150465	1.10993	75035.4	94757.8	4.87527	4.97661	30	0.004329	0.0552781	TRUE	FALSE
Aspartate	Asp	m + 1	15N1	Asp (m + 1)	Ratio1To0	Liver	5	6	5	6	0.100492	0.0964601	0.100762	0.0962535	0.0590775	1.0418	15557.7	10852.9	4.19195	4.03554	21	0.329004	0.602368	FALSE	FALSE
Aspartate	Asp	m + 1	15N1	Asp (m + 1)	Ratio1To0	Heart	5	6	5	6	0.095982	0.0941632	0.0952776	0.0946361	0.0276002	1.01932	64985.5	87459.1	4.81282	4.9418	18	0.662338	0.822554	FALSE	FALSE
Aspartate	Asp	m + 1	15N1	Asp (m + 1)	Ratio1To0	Muscle	5	6	5	6	0.0924154	0.0959641	0.0980065	0.0952225	-0.0543612	0.963021	4594.04	6734.32	3.66219	3.82829	12	0.662338	0.822554	FALSE	FALSE
Aspartate	Asp	m + 1	15N1	Asp (m + 1)	Ratio1To0	Brain	5	6	5	6	0.0871159	0.080876	0.0869752	0.0810541	0.107225	1.07715	228328	301587	5.35856	5.47941	29	0.00865801	0.0817734	TRUE	FALSE
Aspartate	Asp	m + 1	15N1	Asp (m + 1)	Ratio1To0	Lung	5	6	5	6	0.096509	0.095923	0.0957221	0.0962037	0.0087867	1.00611	43067.4	55562.6	4.63415	4.74478	16	0.930736	0.969679	FALSE	FALSE
Aspartate	Asp	m + 1	15N1	Asp (m + 1)	Ratio1To0	Spleen	5	6	5	6	0.106325	0.095541	0.106523	0.0954491	0.154293	1.11288	377217	335169	5.57659	5.52526	30	0.004329	0.0552781	TRUE	FALSE
Aspartate	Asp	m + 1	15N1	Asp (m + 1)	Ratio1To0	Duodenum	5	6	5	6	0.106891	0.103301	0.108166	0.102128	0.0492889	1.03475	65768.2	56568.1	4.81802	4.75257	18	0.662338	0.822554	FALSE	FALSE
Aspartate	Asp	m + 1	15N1	Asp (m + 1)	Ratio1To0	Jejunum	5	6	5	6	0.103439	0.101071	0.106555	0.101092	0.0334099	1.02343	56118.8	45921	4.74911	4.66201	18	0.662338	0.822554	FALSE	FALSE
Aspartate	Asp	m + 1	15N1	Asp (m + 1)	Ratio1To0	Ileum	5	6	5	6	0.108562	0.0971307	0.108059	0.0984029	0.16052	1.11769	96165.8	90634.6	4.98302	4.95729	30	0.004329	0.0552781	TRUE	FALSE
Aspartate	Asp	m + 1	15N1	Asp (m + 1)	Ratio1To0	Colon	5	6	5	6	0.104053	0.0987427	0.104192	0.0993173	0.0755748	1.05378	69230.1	49719.3	4.84029	4.69653	30	0.004329	0.0552781	TRUE	FALSE
Aspartate	Asp	m + 1	15N1	Asp (m + 1)	Ratio1To0	Erythrocytes	5	6	5	6	0.09088	0.0873511	0.0924578	0.0863298	0.0571367	1.0404	7161.89	2031.62	3.85503	3.30784	22	0.246753	0.509888	FALSE	FALSE
Aspartate	Asp	m + 1	15N1	Asp (m + 1)	Ratio1To0	Plasma	5	6	5	6	0.0862028	0.0995937	0.081905	0.0993381	-0.208321	0.865544	203.93	331.968	2.30948	2.5211	7	0.177489	0.45328	FALSE	FALSE
Aspartate	Asp	m + 1	15N1	Asp (m + 1)	Ratio1To0	Urine	4	6	4	6	0.108879	0.142823	0.103214	0.120311	-0.391512	0.76233	1753.71	790.293	3.24396	2.89779	10	0.761905	0.882594	FALSE	FALSE
Ornithine	Orn	m + 6	13C515N1	Orn (m + 6)	Ratio6To0	Cortex	5	6	5	6	0.079616	0.0605616	0.0835416	0.0609693	0.394655	1.31463	13078.9	4518.08	4.11657	3.65495	28	0.017316	0.116532	TRUE	FALSE
Ornithine	Orn	m + 6	13C515N1	Orn (m + 6)	Ratio6To0	Medulla	5	6	5	6	0.0759209	0.0594424	0.0780268	0.0598945	0.353006	1.27722	10060.4	6426.82	4.00262	3.808	26	0.0519481	0.226931	FALSE	FALSE
Ornithine	Orn	m + 6	13C515N1	Orn (m + 6)	Ratio6To0	Liver	5	6	5	6	0.111473	0.127807	0.115512	0.133658	-0.197278	0.872195	146531	111261	5.16593	5.04634	9	0.329004	0.602368	FALSE	FALSE
Ornithine	Orn	m + 6	13C515N1	Orn (m + 6)	Ratio6To0	Heart	5	6	5	6	0.0423953	0.0493002	0.0452508	0.0460039	-0.217687	0.859943	14441.6	12908.3	4.15962	4.11087	11	0.536797	0.742569	FALSE	FALSE
Ornithine	Orn	m + 6	13C515N1	Orn (m + 6)	Ratio6To0	Muscle	5	6	5	6	0.0676787	0.0752755	0.0674451	0.0775949	-0.153479	0.89908	5649.53	5529.29	3.75201	3.74267	10	0.428571	0.662822	FALSE	FALSE
Ornithine	Orn	m + 6	13C515N1	Orn (m + 6)	Ratio6To0	Brain	5	6	5	6	0.0286534	0.0241084	0.0278032	0.0251089	0.249168	1.18852	1241.24	1103.24	3.09385	3.04267	20	0.428571	0.662822	FALSE	FALSE
Ornithine	Orn	m + 6	13C515N1	Orn (m + 6)	Ratio6To0	Lung	5	6	5	6	0.0565237	0.0559827	0.0558059	0.060321	0.0138727	1.00966	12918.7	21240.1	4.11122	4.32716	15	1	1	FALSE	FALSE
Ornithine	Orn	m + 6	13C515N1	Orn (m + 6)	Ratio6To0	Spleen	5	6	5	6	0.0670341	0.0634468	0.0724537	0.0638681	0.0793478	1.05654	2548.11	3376.67	3.40622	3.52849	18	0.662338	0.822554	FALSE	FALSE
Ornithine	Orn	m + 6	13C515N1	Orn (m + 6)	Ratio6To0	Duodenum	5	6	5	6	0.0870303	0.0945718	0.0885759	0.0904448	-0.119893	0.920256	25450.7	33088.4	4.4057	4.51968	14	0.930736	0.969679	FALSE	FALSE
Ornithine	Orn	m + 6	13C515N1	Orn (m + 6)	Ratio6To0	Jejunum	5	6	5	6	0.0800495	0.0727759	0.0758934	0.0708593	0.137431	1.09995	23811.5	24915.9	4.37679	4.39648	20	0.428571	0.662822	FALSE	FALSE
Ornithine	Orn	m + 6	13C515N1	Orn (m + 6)	Ratio6To0	Ileum	5	6	5	6	0.0814769	0.0577473	0.0770233	0.0584063	0.496637	1.41092	20831.4	14289.5	4.31872	4.15502	30	0.004329	0.0552781	TRUE	FALSE
Ornithine	Orn	m + 6	13C515N1	Orn (m + 6)	Ratio6To0	Colon	5	6	5	6	0.0678771	0.0683493	0.0681624	0.0624003	-0.0100022	0.993091	13999.3	11006.5	4.14611	4.04165	19	0.536797	0.742569	FALSE	FALSE
Ornithine	Orn	m + 6	13C515N1	Orn (m + 6)	Ratio6To0	Erythrocytes	5	6	5	6	0.0790957	0.0889889	0.0792272	0.0942277	-0.170027	0.888826	27810.2	12112.9	4.4442	4.08325	11	0.536797	0.742569	FALSE	FALSE
Ornithine	Orn	m + 6	13C515N1	Orn (m + 6)	Ratio6To0	Plasma	5	6	5	6	0.0804319	0.0831719	0.0814872	0.0814928	-0.0483286	0.967056	34108.3	25272.6	4.53286	4.40265	14	0.930736	0.969679	FALSE	FALSE
Ornithine	Orn	m + 6	13C515N1	Orn (m + 6)	Ratio6To0	Urine	4	6	4	6	0.120206	0.197701	0.113932	0.200448	-0.717807	0.608021	17494.8	4833.93	4.24291	3.6843	3	0.0666667	0.283761	FALSE	FALSE
Citrulline	Citr	m + 6	13C515N1	Citr (m + 6)	Ratio6To0	Cortex	5	6	5	6	0.00346914	0.0027029	0.00356581	0.00275975	0.360068	1.28349	677.394	108.646	2.83084	2.03602	22	0.246753	0.509888	FALSE	FALSE
Citrulline	Citr	m + 6	13C515N1	Citr (m + 6)	Ratio6To0	Medulla	5	6	5	6	0.00295561	0.00269323	0.00284492	0.00251589	0.134116	1.09742	1356.8	239.912	3.13251	2.38005	18	0.662338	0.822554	FALSE	FALSE
Citrulline	Citr	m + 6	13C515N1	Citr (m + 6)	Ratio6To0	Liver	5	6	5	6	0.0136187	0.0381454	0.00914024	0.0428895	-1.48592	0.357021	1390.88	984.563	3.14329	2.99324	4	0.0519481	0.226931	FALSE	FALSE
Citrulline	Citr	m + 6	13C515N1	Citr (m + 6)	Ratio6To0	Heart	5	6	5	6	0.00335345	0.00299108	0.00342592	0.00294031	0.164981	1.12115	2756.58	844.3	3.44037	2.9265	22	0.246753	0.509888	FALSE	FALSE
Citrulline	Citr	m + 6	13C515N1	Citr (m + 6)	Ratio6To0	Muscle	5	6	5	6	0.0027387	0.00210635	0.00275462	0.00210693	0.378744	1.30021	864.14	397.616	2.93658	2.59946	22	0.246753	0.509888	FALSE	FALSE
Citrulline	Citr	m + 6	13C515N1	Citr (m + 6)	Ratio6To0	Brain	5	6	5	6	0.00257292	0.00256772	0.00266444	0.00259521	0.00292153	1.00203	601.832	547.21	2.77948	2.73815	14	0.930736	0.969679	FALSE	FALSE
Citrulline	Citr	m + 6	13C515N1	Citr (m + 6)	Ratio6To0	Lung	5	6	5	6	0.00319049	0.00306945	0.00320313	0.00318654	0.0557956	1.03943	579.319	227.134	2.76292	2.35628	15	1	1	FALSE	FALSE
Citrulline	Citr	m + 6	13C515N1	Citr (m + 6)	Ratio6To0	Spleen	5	6	5	6	0.00372186	0.00437742	0.00386069	0.00394984	-0.234058	0.85024	987.528	482.879	2.99455	2.68384	10	0.428571	0.662822	FALSE	FALSE
Citrulline	Citr	m + 6	13C515N1	Citr (m + 6)	Ratio6To0	Duodenum	5	6	5	6	0.00266233	0.00247773	0.00263289	0.00243166	0.10367	1.0745	944.556	496.218	2.97523	2.69567	20	0.428571	0.662822	FALSE	FALSE
Citrulline	Citr	m + 6	13C515N1	Citr (m + 6)	Ratio6To0	Jejunum	5	6	5	6	0.00289729	0.0021915	0.00233764	0.00225318	0.402784	1.32206	790.988	340.641	2.89817	2.5323	21	0.329004	0.602368	FALSE	FALSE
Citrulline	Citr	m + 6	13C515N1	Citr (m + 6)	Ratio6To0	Ileum	5	6	5	6	0.00246468	0.00207388	0.0021147	0.00206471	0.249064	1.18844	844.016	381.432	2.92635	2.58142	24	0.125541	0.390747	FALSE	FALSE
Citrulline	Citr	m + 6	13C515N1	Citr (m + 6)	Ratio6To0	Colon	5	6	5	6	0.00301161	0.00369927	0.00286877	0.00358324	-0.296707	0.814109	1654.25	500.825	3.2186	2.69969	9	0.329004	0.602368	FALSE	FALSE
Citrulline	Citr	m + 6	13C515N1	Citr (m + 6)	Ratio6To0	Erythrocytes	5	6	5	6	0.00266405	0.00246893	0.0026891	0.00248294	0.10974	1.07903	1181.82	290.193	3.07255	2.46269	17	0.792208	0.882594	FALSE	FALSE
Citrulline	Citr	m + 6	13C515N1	Citr (m + 6)	Ratio6To0	Plasma	5	6	5	6	0.00235883	0.00207059	0.00221437	0.00191621	0.188033	1.13921	1511.24	628.017	3.17933	2.79797	18	0.662338	0.822554	FALSE	FALSE
Citrulline	Citr	m + 6	13C515N1	Citr (m + 6)	Ratio6To0	Urine	4	6	4	6	0.00399774	0.0205155	0.00323236	0.0211432	-2.35946	0.194864	7129.51	839.78	3.85306	2.92417	1	0.0190476	0.121612	TRUE	FALSE
Argininosuccinate	ArgSuc	m + 6	13C515N1	ArgSuc (m + 6)	Ratio6To0	Cortex	5	6	5	6	0.0494143	0.0688243	0.0463233	0.0513478	-0.477988	0.717978	909.298	660.059	2.95871	2.81958	7	0.177489	0.45328	FALSE	FALSE
Argininosuccinate	ArgSuc	m + 6	13C515N1	ArgSuc (m + 6)	Ratio6To0	Medulla	5	6	5	6	0.0619197	0.0920718	0.0641389	0.0734379	-0.572361	0.672515	543.158	1053.44	2.73493	3.02261	12	0.662338	0.822554	FALSE	FALSE
Argininosuccinate	ArgSuc	m + 6	13C515N1	ArgSuc (m + 6)	Ratio6To0	Liver	5	6	5	6	0.14505	0.34928	0.133815	0.34168	-1.26784	0.415282	95.4137	213.402	1.97961	2.3292	2	0.017316	0.116532	TRUE	FALSE
Argininosuccinate	ArgSuc	m + 6	13C515N1	ArgSuc (m + 6)	Ratio6To0	Heart	5	6	5	6	0.0289718	0.0369783	0.0285231	0.0364229	-0.352029	0.783482	170.615	192.565	2.23202	2.28458	7	0.177489	0.45328	FALSE	FALSE
Argininosuccinate	ArgSuc	m + 6	13C515N1	ArgSuc (m + 6)	Ratio6To0	Muscle	5	6	5	6	0.0279138	0.0360983	0.0274402	0.0353825	-0.370952	0.773272	195.78	601.79	2.29177	2.77944	3	0.030303	0.157197	TRUE	FALSE
Argininosuccinate	ArgSuc	m + 6	13C515N1	ArgSuc (m + 6)	Ratio6To0	Brain	5	6	5	6	0.025565	0.021555	0.0277381	0.0213412	0.246147	1.18603	123.784	105.112	2.09266	2.02165	24	0.125541	0.390747	FALSE	FALSE
Argininosuccinate	ArgSuc	m + 6	13C515N1	ArgSuc (m + 6)	Ratio6To0	Lung	5	6	5	6	0.0255486	0.0290595	0.0279027	0.0286917	-0.185766	0.879182	73.8753	60.3467	1.8685	1.78065	13	0.792208	0.882594	FALSE	FALSE
Argininosuccinate	ArgSuc	m + 6	13C515N1	ArgSuc (m + 6)	Ratio6To0	Spleen	5	6	5	6	0.0418296	0.0487936	0.0476738	0.0476698	-0.222167	0.857277	126.074	146.447	2.10063	2.16568	11	0.536797	0.742569	FALSE	FALSE
Argininosuccinate	ArgSuc	m + 6	13C515N1	ArgSuc (m + 6)	Ratio6To0	Duodenum	5	6	5	6	0.0389989	0.0476204	0.0370212	0.0487494	-0.288147	0.818953	146.542	141.779	2.16596	2.15161	9	0.329004	0.602368	FALSE	FALSE
Argininosuccinate	ArgSuc	m + 6	13C515N1	ArgSuc (m + 6)	Ratio6To0	Jejunum	5	6	5	6	0.0569615	0.0491877	0.0549778	0.0475714	0.211688	1.15804	273.531	153.686	2.43701	2.18663	20	0.428571	0.662822	FALSE	FALSE
Argininosuccinate	ArgSuc	m + 6	13C515N1	ArgSuc (m + 6)	Ratio6To0	Ileum	5	6	5	6	0.0519443	0.0463873	0.046923	0.0447409	0.163235	1.1198	205.516	262.616	2.31285	2.41932	17	0.792208	0.882594	FALSE	FALSE
Argininosuccinate	ArgSuc	m + 6	13C515N1	ArgSuc (m + 6)	Ratio6To0	Colon	5	6	5	6	0.0296843	0.0409322	0.0288105	0.041059	-0.463534	0.725207	109.064	79.943	2.03768	1.90278	7	0.177489	0.45328	FALSE	FALSE
Argininosuccinate	ArgSuc	m + 6	13C515N1	ArgSuc (m + 6)	Ratio6To0	Erythrocytes	5	6	5	6	0.0298305	0.0433483	0.0252405	0.0448329	-0.539187	0.688159	33.9703	26.7162	1.5311	1.42678	7	0.177489	0.45328	FALSE	FALSE
Argininosuccinate	ArgSuc	m + 6	13C515N1	ArgSuc (m + 6)	Ratio6To0	Plasma	5	6	5	6	0.0586026	0.0595155	0.0642423	0.0606741	-0.0223018	0.98466	50.6779	28.8294	1.70482	1.45984	16	0.930736	0.969679	FALSE	FALSE
Argininosuccinate	ArgSuc	m + 6	13C515N1	ArgSuc (m + 6)	Ratio6To0	Urine	4	6	4	6	0.0612816	0.0454838	0.0611221	0.0559079	0.430103	1.34733	3606.99	1125.48	3.55715	3.05134	15	0.609524	0.822554	FALSE	FALSE
Arginine	Arg	m + 6	13C515N1	Arg (m + 6)	Ratio6To0	Cortex	5	6	5	6	0.075601	0.0723022	0.0756284	0.0711895	0.0643649	1.04562	306749	219135	5.48678	5.34071	20	0.428571	0.662822	FALSE	FALSE
Arginine	Arg	m + 6	13C515N1	Arg (m + 6)	Ratio6To0	Medulla	5	6	5	6	0.0687592	0.057913	0.0665146	0.0582298	0.247667	1.18729	198886	174673	5.2986	5.24223	27	0.030303	0.157197	TRUE	FALSE
Arginine	Arg	m + 6	13C515N1	Arg (m + 6)	Ratio6To0	Liver	5	6	5	6	0.12772	0.0755805	0.0975078	0.0629448	0.756899	1.68985	6518.08	2898.06	3.81412	3.46211	23	0.177489	0.45328	FALSE	FALSE
Arginine	Arg	m + 6	13C515N1	Arg (m + 6)	Ratio6To0	Heart	5	6	5	6	0.0427405	0.049205	0.0429444	0.0500831	-0.203204	0.86862	121198	112808	5.08349	5.05234	4	0.0519481	0.226931	FALSE	FALSE
Arginine	Arg	m + 6	13C515N1	Arg (m + 6)	Ratio6To0	Muscle	5	6	5	6	0.0383276	0.0451893	0.0384506	0.044811	-0.237597	0.848157	137132	224924	5.13714	5.35204	6	0.125541	0.390747	FALSE	FALSE
Arginine	Arg	m + 6	13C515N1	Arg (m + 6)	Ratio6To0	Brain	5	6	5	6	0.0236647	0.0216967	0.0243488	0.0213026	0.12526	1.0907	66074.9	67683.7	4.82004	4.83048	22	0.246753	0.509888	FALSE	FALSE
Arginine	Arg	m + 6	13C515N1	Arg (m + 6)	Ratio6To0	Lung	5	6	5	6	0.0434488	0.0431412	0.0418763	0.0440174	0.0102496	1.00713	107579	80395.7	5.03173	4.90523	15	1	1	FALSE	FALSE
Arginine	Arg	m + 6	13C515N1	Arg (m + 6)	Ratio6To0	Spleen	5	6	5	6	0.054076	0.0513159	0.0520639	0.0531042	0.0755829	1.05379	117798	114184	5.07114	5.05761	17	0.792208	0.882594	FALSE	FALSE
Arginine	Arg	m + 6	13C515N1	Arg (m + 6)	Ratio6To0	Duodenum	5	6	5	6	0.0579352	0.0626776	0.0562167	0.064466	-0.11351	0.924336	146036	126639	5.16446	5.10257	10	0.428571	0.662822	FALSE	FALSE
Arginine	Arg	m + 6	13C515N1	Arg (m + 6)	Ratio6To0	Jejunum	5	6	5	6	0.0589208	0.058778	0.0567461	0.0610957	0.00349991	1.00243	198951	128024	5.29875	5.10729	11	0.536797	0.742569	FALSE	FALSE
Arginine	Arg	m + 6	13C515N1	Arg (m + 6)	Ratio6To0	Ileum	5	6	5	6	0.0583754	0.0606827	0.0566127	0.0616357	-0.0559235	0.961978	130949	143187	5.1171	5.1559	12	0.662338	0.822554	FALSE	FALSE
Arginine	Arg	m + 6	13C515N1	Arg (m + 6)	Ratio6To0	Colon	5	6	5	6	0.0497061	0.0503678	0.0497244	0.0538384	-0.0190768	0.986864	81937.6	75997.5	4.91348	4.8808	13	0.792208	0.882594	FALSE	FALSE
Arginine	Arg	m + 6	13C515N1	Arg (m + 6)	Ratio6To0	Erythrocytes	5	6	5	6	0.0380591	0.0443845	0.0374142	0.0447667	-0.221814	0.857487	122701	104273	5.08885	5.01817	1	0.00865801	0.0817734	TRUE	FALSE
Arginine	Arg	m + 6	13C515N1	Arg (m + 6)	Ratio6To0	Plasma	5	6	5	6	0.0554117	0.0588153	0.054801	0.0596144	-0.0860017	0.94213	172012	179727	5.23556	5.25461	10	0.428571	0.662822	FALSE	FALSE
Arginine	Arg	m + 6	13C515N1	Arg (m + 6)	Ratio6To0	Urine	4	6	4	6	0.066847	0.0619281	0.0673408	0.0635958	0.110269	1.07943	59024.1	11882.3	4.77103	4.0749	15	0.609524	0.822554	FALSE	FALSE
Urea	Urea	m + 1	15N1	Urea (m + 1)	Ratio1To0	Cortex	5	6	5	6	5.45182e-05	4.61792e-05	5.51997e-05	4.56078e-05	0.239495	1.18058	432.447	104.231	2.63593	2.018	29	0.00865801	0.0817734	TRUE	FALSE
Urea	Urea	m + 1	15N1	Urea (m + 1)	Ratio1To0	Medulla	5	6	5	6	5.32119e-05	4.59938e-05	5.30103e-05	4.75973e-05	0.210312	1.15694	628.535	416.824	2.79833	2.61995	30	0.004329	0.0552781	TRUE	FALSE
Urea	Urea	m + 1	15N1	Urea (m + 1)	Ratio1To0	Liver	5	6	5	6	5.72815e-05	5.76569e-05	5.6992e-05	4.39271e-05	-0.00942367	0.993489	523.415	72.3713	2.71885	1.85957	23	0.177489	0.45328	FALSE	FALSE
Urea	Urea	m + 1	15N1	Urea (m + 1)	Ratio1To0	Heart	5	6	5	6	5.88902e-05	5.58048e-05	5.98804e-05	5.3533e-05	0.077637	1.05529	596.877	82.2158	2.77588	1.91496	20	0.428571	0.662822	FALSE	FALSE
Urea	Urea	m + 1	15N1	Urea (m + 1)	Ratio1To0	Muscle	5	6	5	6	6.01342e-05	5.1906e-05	6.00235e-05	5.73791e-05	0.212286	1.15852	485.188	69.7756	2.68591	1.8437	25	0.0822511	0.294684	FALSE	FALSE
Urea	Urea	m + 1	15N1	Urea (m + 1)	Ratio1To0	Brain	5	6	5	6	6.10362e-05	5.10584e-05	6.06489e-05	4.93503e-05	0.257518	1.19542	640.696	138.202	2.80665	2.14052	27	0.030303	0.157197	TRUE	FALSE
Urea	Urea	m + 1	15N1	Urea (m + 1)	Ratio1To0	Lung	5	6	5	6	5.77987e-05	5.45583e-05	5.61959e-05	5.48071e-05	0.0832403	1.05939	664.054	112.898	2.8222	2.05269	22	0.246753	0.509888	FALSE	FALSE
Urea	Urea	m + 1	15N1	Urea (m + 1)	Ratio1To0	Spleen	5	6	5	6	5.88676e-05	6.53901e-05	5.8493e-05	6.28149e-05	-0.151598	0.900253	490.13	69.1633	2.69031	1.83988	12	0.662338	0.822554	FALSE	FALSE
Urea	Urea	m + 1	15N1	Urea (m + 1)	Ratio1To0	Duodenum	5	6	5	6	6.17643e-05	6.81485e-05	6.22437e-05	6.8929e-05	-0.141909	0.906319	420.841	44.2906	2.62412	1.64631	10	0.428571	0.662822	FALSE	FALSE
Urea	Urea	m + 1	15N1	Urea (m + 1)	Ratio1To0	Jejunum	5	6	5	6	6.12123e-05	5.8574e-05	6.05624e-05	5.37055e-05	0.0635608	1.04504	737.852	68.8439	2.86797	1.83787	20	0.428571	0.662822	FALSE	FALSE
Urea	Urea	m + 1	15N1	Urea (m + 1)	Ratio1To0	Ileum	5	6	5	6	6.34005e-05	6.07002e-05	6.43532e-05	6.06895e-05	0.062793	1.04449	355.405	69.7159	2.55072	1.84333	18	0.662338	0.822554	FALSE	FALSE
Urea	Urea	m + 1	15N1	Urea (m + 1)	Ratio1To0	Colon	5	6	5	6	6.24157e-05	4.98606e-05	6.18063e-05	5.14142e-05	0.324008	1.2518	718.34	57.7301	2.85633	1.7614	30	0.004329	0.0552781	TRUE	FALSE
Urea	Urea	m + 1	15N1	Urea (m + 1)	Ratio1To0	Erythrocytes	5	6	5	6	5.81923e-05	5.26575e-05	5.89191e-05	5.1885e-05	0.14419	1.10511	980.525	374.53	2.99146	2.57349	24	0.125541	0.390747	FALSE	FALSE
Urea	Urea	m + 1	15N1	Urea (m + 1)	Ratio1To0	Plasma	5	6	5	6	5.68482e-05	5.20616e-05	5.60915e-05	5.28967e-05	0.126896	1.09194	1255.72	677.904	3.09889	2.83117	29	0.00865801	0.0817734	TRUE	FALSE
Urea	Urea	m + 1	15N1	Urea (m + 1)	Ratio1To0	Urine	4	6	4	6	5.70934e-05	4.74555e-05	5.72219e-05	4.90366e-05	0.266748	1.20309	5136.75	3922.79	3.71069	3.59359	24	0.00952381	0.0817734	TRUE	FALSE
Argininosuccinate	ArgSuc	m + 10	13C915N1	ArgSuc (m + 10)	Ratio10To0	Cortex	5	6	5	6	0.148463	0.237649	0.11795	0.253521	-0.678725	0.624717	2703.38	2450.85	3.43191	3.38932	5	0.0822511	0.294684	FALSE	FALSE
Argininosuccinate	ArgSuc	m + 10	13C915N1	ArgSuc (m + 10)	Ratio10To0	Medulla	5	6	5	6	0.174419	0.292478	0.137352	0.28811	-0.745766	0.596351	1479.62	3423.4	3.17015	3.53446	2	0.017316	0.116532	TRUE	FALSE
Argininosuccinate	ArgSuc	m + 10	13C915N1	ArgSuc (m + 10)	Ratio10To0	Liver	5	6	5	6	0.183677	1.00171	0.0854006	0.245363	-2.44722	0.183364	124.431	475.646	2.09493	2.67728	9	0.329004	0.602368	FALSE	FALSE
Argininosuccinate	ArgSuc	m + 10	13C915N1	ArgSuc (m + 10)	Ratio10To0	Heart	5	6	5	6	0.268619	0.377921	0.205471	0.369091	-0.492524	0.71078	1631.61	1973.62	3.21262	3.29526	7	0.177489	0.45328	FALSE	FALSE
Argininosuccinate	ArgSuc	m + 10	13C915N1	ArgSuc (m + 10)	Ratio10To0	Muscle	5	6	5	6	0.333942	0.405572	0.248519	0.400002	-0.280363	0.823384	2273.34	6531.27	3.35666	3.815	9	0.329004	0.602368	FALSE	FALSE
Argininosuccinate	ArgSuc	m + 10	13C915N1	ArgSuc (m + 10)	Ratio10To0	Brain	5	6	5	6	0.105993	0.178165	0.0853984	0.17599	-0.749244	0.594915	476.084	871.456	2.67768	2.94025	1	0.00865801	0.0817734	TRUE	FALSE
Argininosuccinate	ArgSuc	m + 10	13C915N1	ArgSuc (m + 10)	Ratio10To0	Lung	5	6	5	6	0.250729	0.305025	0.228553	0.315444	-0.282799	0.821995	726.093	736.611	2.86099	2.86724	8	0.246753	0.509888	FALSE	FALSE
Argininosuccinate	ArgSuc	m + 10	13C915N1	ArgSuc (m + 10)	Ratio10To0	Spleen	5	6	5	6	0.293009	0.374169	0.233603	0.353087	-0.352745	0.783093	831.812	1164.26	2.92003	3.06605	8	0.246753	0.509888	FALSE	FALSE
Argininosuccinate	ArgSuc	m + 10	13C915N1	ArgSuc (m + 10)	Ratio10To0	Duodenum	5	6	5	6	0.730522	0.752279	0.799721	0.655983	-0.0423404	0.971078	3440.14	2162.39	3.53658	3.33493	14	0.930736	0.969679	FALSE	FALSE
Argininosuccinate	ArgSuc	m + 10	13C915N1	ArgSuc (m + 10)	Ratio10To0	Jejunum	5	6	5	6	0.473361	0.534394	0.399737	0.412467	-0.174963	0.88579	2622.13	2243.12	3.41865	3.35085	13	0.792208	0.882594	FALSE	FALSE
Argininosuccinate	ArgSuc	m + 10	13C915N1	ArgSuc (m + 10)	Ratio10To0	Ileum	5	6	5	6	0.350657	0.463671	0.276933	0.356633	-0.403039	0.756264	1337.79	3063.64	3.12639	3.48624	10	0.428571	0.662822	FALSE	FALSE
Argininosuccinate	ArgSuc	m + 10	13C915N1	ArgSuc (m + 10)	Ratio10To0	Colon	5	6	5	6	0.326485	0.383827	0.276928	0.375267	-0.23344	0.850604	1107	742.216	3.04415	2.87053	10	0.428571	0.662822	FALSE	FALSE
Argininosuccinate	ArgSuc	m + 10	13C915N1	ArgSuc (m + 10)	Ratio10To0	Erythrocytes	5	6	5	6	0.22284	0.328515	0.168294	0.338076	-0.559948	0.678326	230.956	199.945	2.36353	2.30091	7	0.177489	0.45328	FALSE	FALSE
Argininosuccinate	ArgSuc	m + 10	13C915N1	ArgSuc (m + 10)	Ratio10To0	Plasma	5	6	5	6	0.117253	0.345605	0.102747	0.336841	-1.5595	0.339269	98.1026	146.231	1.99168	2.16504	1	0.00865801	0.0817734	TRUE	FALSE
Argininosuccinate	ArgSuc	m + 10	13C915N1	ArgSuc (m + 10)	Ratio10To0	Urine	4	6	4	6	0.0724489	0.193557	0.0691836	0.187891	-1.41773	0.374302	4123.95	3804.04	3.61531	3.58024	2	0.0380952	0.193586	TRUE	FALSE
Asymmetric dimethylarginine	ADMA	m + 6	13C515N1	ADMA (m + 6)	Ratio6To0	Cortex	5	6	5	6	0.0621075	0.0737131	0.0619667	0.0712241	-0.247153	0.842557	69995.8	72655.8	4.84507	4.86127	3	0.030303	0.157197	TRUE	FALSE
Asymmetric dimethylarginine	ADMA	m + 6	13C515N1	ADMA (m + 6)	Ratio6To0	Medulla	5	6	5	6	0.0564643	0.0596183	0.0530077	0.058904	-0.0784165	0.947097	49314.2	66122.2	4.69297	4.82035	10	0.428571	0.662822	FALSE	FALSE
Asymmetric dimethylarginine	ADMA	m + 6	13C515N1	ADMA (m + 6)	Ratio6To0	Liver	5	6	5	6	0.0676732	0.0887902	0.070567	0.0892134	-0.391815	0.76217	35420.4	29303.5	4.54925	4.46692	3	0.030303	0.157197	TRUE	FALSE
Asymmetric dimethylarginine	ADMA	m + 6	13C515N1	ADMA (m + 6)	Ratio6To0	Heart	5	6	5	6	0.0532641	0.0551009	0.0519544	0.0553945	-0.0489119	0.966665	35361.8	20242.8	4.54853	4.30627	12	0.662338	0.822554	FALSE	FALSE
Asymmetric dimethylarginine	ADMA	m + 6	13C515N1	ADMA (m + 6)	Ratio6To0	Muscle	5	6	5	6	0.0529358	0.0541922	0.0505334	0.0539202	-0.0338407	0.976816	31316.8	27848.6	4.49578	4.4448	13	0.792208	0.882594	FALSE	FALSE
Asymmetric dimethylarginine	ADMA	m + 6	13C515N1	ADMA (m + 6)	Ratio6To0	Brain	5	6	5	6	0.0247594	0.0222908	0.0252834	0.0223894	0.151526	1.11074	5417.63	3447.85	3.73381	3.53755	23	0.177489	0.45328	FALSE	FALSE
Asymmetric dimethylarginine	ADMA	m + 6	13C515N1	ADMA (m + 6)	Ratio6To0	Lung	5	6	5	6	0.0502899	0.0499164	0.0487106	0.0497653	0.0107554	1.00748	27486.5	25570	4.43912	4.40773	15	1	1	FALSE	FALSE
Asymmetric dimethylarginine	ADMA	m + 6	13C515N1	ADMA (m + 6)	Ratio6To0	Spleen	5	6	5	6	0.0574175	0.0599791	0.0552622	0.0609204	-0.0629694	0.957292	46835.5	39939.5	4.67058	4.6014	12	0.662338	0.822554	FALSE	FALSE
Asymmetric dimethylarginine	ADMA	m + 6	13C515N1	ADMA (m + 6)	Ratio6To0	Duodenum	5	6	5	6	0.0576402	0.0618081	0.055004	0.0632492	-0.10072	0.932567	24426.1	16401.9	4.38785	4.2149	11	0.536797	0.742569	FALSE	FALSE
Asymmetric dimethylarginine	ADMA	m + 6	13C515N1	ADMA (m + 6)	Ratio6To0	Jejunum	5	6	5	6	0.0565069	0.0592806	0.0549239	0.0591002	-0.0691314	0.953212	20773.6	15413.9	4.31751	4.18791	11	0.536797	0.742569	FALSE	FALSE
Asymmetric dimethylarginine	ADMA	m + 6	13C515N1	ADMA (m + 6)	Ratio6To0	Ileum	5	6	5	6	0.0588833	0.0621297	0.0548643	0.0637835	-0.0774244	0.947748	17313.1	15638.3	4.23837	4.19419	10	0.428571	0.662822	FALSE	FALSE
Asymmetric dimethylarginine	ADMA	m + 6	13C515N1	ADMA (m + 6)	Ratio6To0	Colon	5	6	5	6	0.053929	0.0574712	0.0524921	0.0593232	-0.0917776	0.938366	15091.4	12457.3	4.17873	4.09542	8	0.246753	0.509888	FALSE	FALSE
Asymmetric dimethylarginine	ADMA	m + 6	13C515N1	ADMA (m + 6)	Ratio6To0	Erythrocytes	5	6	5	6	0.048443	0.0464012	0.0490646	0.0445409	0.0621251	1.044	21714.8	10223.9	4.33676	4.00962	19	0.536797	0.742569	FALSE	FALSE
Asymmetric dimethylarginine	ADMA	m + 6	13C515N1	ADMA (m + 6)	Ratio6To0	Plasma	5	6	5	6	0.0559881	0.0591918	0.0550846	0.0594167	-0.0802775	0.945876	34734.5	28875.3	4.54076	4.46053	11	0.536797	0.742569	FALSE	FALSE
Asymmetric dimethylarginine	ADMA	m + 6	13C515N1	ADMA (m + 6)	Ratio6To0	Urine	4	6	4	6	0.0537022	0.0582556	0.0525505	0.0584244	-0.117416	0.921837	222415	389051	5.34716	5.59001	6	0.257143	0.526984	FALSE	FALSE
Monomethylarginine	MMA	m + 6	13C515N1	MMA (m + 6)	Ratio6To0	Cortex	5	6	5	6	0.0313598	0.0353956	0.0299175	0.0351139	-0.174656	0.885979	947.729	1460.3	2.97668	3.16444	8	0.246753	0.509888	FALSE	FALSE
Monomethylarginine	MMA	m + 6	13C515N1	MMA (m + 6)	Ratio6To0	Medulla	5	6	5	6	0.0319801	0.0300675	0.0347546	0.0308293	0.0889668	1.06361	620.652	1318.79	2.79285	3.12018	18	0.662338	0.822554	FALSE	FALSE
Monomethylarginine	MMA	m + 6	13C515N1	MMA (m + 6)	Ratio6To0	Liver	5	6	5	6	0.0396165	0.0477161	0.0413054	0.0446652	-0.268377	0.830253	897.232	749.11	2.9529	2.87455	9	0.329004	0.602368	FALSE	FALSE
Monomethylarginine	MMA	m + 6	13C515N1	MMA (m + 6)	Ratio6To0	Heart	5	6	5	6	0.0326047	0.0349854	0.0329579	0.0347534	-0.10167	0.931954	1182.88	766.998	3.07294	2.88479	12	0.662338	0.822554	FALSE	FALSE
Monomethylarginine	MMA	m + 6	13C515N1	MMA (m + 6)	Ratio6To0	Muscle	5	6	5	6	0.0337322	0.0347355	0.0321521	0.0359676	-0.0422863	0.971115	1195.07	1782.89	3.07739	3.25113	13	0.792208	0.882594	FALSE	FALSE
Monomethylarginine	MMA	m + 6	13C515N1	MMA (m + 6)	Ratio6To0	Brain	5	6	5	6	0.00897207	0.00585703	0.00895835	0.00552376	0.615272	1.53185	126.467	82.0593	2.10198	1.91413	26	0.0519481	0.226931	FALSE	FALSE
Monomethylarginine	MMA	m + 6	13C515N1	MMA (m + 6)	Ratio6To0	Lung	5	6	5	6	0.0215584	0.0244101	0.0221935	0.0230784	-0.179228	0.883175	549.357	543.284	2.73985	2.73503	8	0.246753	0.509888	FALSE	FALSE
Monomethylarginine	MMA	m + 6	13C515N1	MMA (m + 6)	Ratio6To0	Spleen	5	6	5	6	0.0313408	0.0332359	0.031196	0.0336293	-0.0847004	0.94298	662.135	614.075	2.82095	2.78822	13	0.792208	0.882594	FALSE	FALSE
Monomethylarginine	MMA	m + 6	13C515N1	MMA (m + 6)	Ratio6To0	Duodenum	5	6	5	6	0.0366255	0.0421621	0.0378371	0.0403403	-0.203099	0.868682	415.367	313.326	2.61843	2.496	10	0.428571	0.662822	FALSE	FALSE
Monomethylarginine	MMA	m + 6	13C515N1	MMA (m + 6)	Ratio6To0	Jejunum	5	6	5	6	0.0380283	0.0403254	0.0385904	0.0419337	-0.084617	0.943035	3475.72	2573.93	3.54104	3.4106	12	0.662338	0.822554	FALSE	FALSE
Monomethylarginine	MMA	m + 6	13C515N1	MMA (m + 6)	Ratio6To0	Ileum	5	6	5	6	0.0334896	0.0388896	0.0321792	0.0392363	-0.21567	0.861146	435.527	405.46	2.63901	2.60795	8	0.246753	0.509888	FALSE	FALSE
Monomethylarginine	MMA	m + 6	13C515N1	MMA (m + 6)	Ratio6To0	Colon	5	6	5	6	0.0270701	0.0392228	0.0267909	0.0390798	-0.534996	0.690161	452.772	518.553	2.65588	2.71479	2	0.017316	0.116532	TRUE	FALSE
Monomethylarginine	MMA	m + 6	13C515N1	MMA (m + 6)	Ratio6To0	Erythrocytes	5	6	5	6	0.0302323	0.0288048	0.030148	0.0276058	0.0697821	1.04956	1246.82	1384.86	3.0958	3.14141	18	0.662338	0.822554	FALSE	FALSE
Monomethylarginine	MMA	m + 6	13C515N1	MMA (m + 6)	Ratio6To0	Plasma	5	6	5	6	0.0362477	0.0372864	0.0355494	0.0376628	-0.0407623	0.972141	3895.86	3697.18	3.5906	3.56787	14	0.930736	0.969679	FALSE	FALSE
Monomethylarginine	MMA	m + 6	13C515N1	MMA (m + 6)	Ratio6To0	Urine	4	6	4	6	0.0674633	0.0795797	0.059778	0.0701363	-0.238297	0.847745	2106.79	2873.84	3.32362	3.45846	10	0.761905	0.882594	FALSE	FALSE
Acetylarginine	AcArg	m + 6	13C515N1	AcArg (m + 6)	Ratio6To0	Cortex	5	6	5	6	0.00187974	0.00318044	0.00188359	0.00305239	-0.75869	0.591033	147.475	24.8988	2.16872	1.39618	2	0.017316	0.116532	TRUE	FALSE
Acetylarginine	AcArg	m + 6	13C515N1	AcArg (m + 6)	Ratio6To0	Medulla	5	6	5	6	0.00152221	0.00174762	0.00161958	0.00147848	-0.199223	0.871019	115.613	14.9485	2.06301	1.1746	17	0.792208	0.882594	FALSE	FALSE
Acetylarginine	AcArg	m + 6	13C515N1	AcArg (m + 6)	Ratio6To0	Liver	5	6	5	6	0.00292601	0.00509589	0.00276815	0.00381757	-0.800399	0.57419	17.9279	16.3309	1.25353	1.21301	5	0.0822511	0.294684	FALSE	FALSE
Acetylarginine	AcArg	m + 6	13C515N1	AcArg (m + 6)	Ratio6To0	Heart	5	6	5	6	0.0123598	0.00897014	0.0120567	0.00776402	0.462448	1.37788	11.4868	6.53355	1.0602	0.815149	17	0.792208	0.882594	FALSE	FALSE
Acetylarginine	AcArg	m + 6	13C515N1	AcArg (m + 6)	Ratio6To0	Muscle	5	6	5	6	0.00374888	0.00236954	0.00385107	0.00246415	0.661855	1.58212	7.23747	5.66691	0.859587	0.753346	17	0.792208	0.882594	FALSE	FALSE
Acetylarginine	AcArg	m + 6	13C515N1	AcArg (m + 6)	Ratio6To0	Brain	5	6	5	6	0.000954442	0.00166427	0.00103941	0.00137759	-0.802163	0.573489	20.39	18.5649	1.30942	1.26869	0	0.004329	0.0552781	TRUE	FALSE
Acetylarginine	AcArg	m + 6	13C515N1	AcArg (m + 6)	Ratio6To0	Lung	5	6	5	6	0.00105774	0.00188742	0.000415187	0.00193419	-0.835424	0.560418	12.6726	20.1563	1.10287	1.30441	8	0.246753	0.509888	FALSE	FALSE
Acetylarginine	AcArg	m + 6	13C515N1	AcArg (m + 6)	Ratio6To0	Spleen	5	6	5	6	0.00119851	0.0015177	0.00109386	0.00101825	-0.340644	0.789689	20.0858	18.5857	1.30289	1.26918	15	1	1	FALSE	FALSE
Acetylarginine	AcArg	m + 6	13C515N1	AcArg (m + 6)	Ratio6To0	Duodenum	5	6	5	6	0.00142656	0.00171463	0.00139331	0.00169146	-0.265359	0.831992	25.556	36.1368	1.40749	1.55795	7	0.177489	0.45328	FALSE	FALSE
Acetylarginine	AcArg	m + 6	13C515N1	AcArg (m + 6)	Ratio6To0	Jejunum	5	6	5	6	0.00298535	0.002766	0.00313223	0.00213369	0.110101	1.0793	35.3462	24.1285	1.54834	1.38253	17	0.792208	0.882594	FALSE	FALSE
Acetylarginine	AcArg	m + 6	13C515N1	AcArg (m + 6)	Ratio6To0	Ileum	5	6	5	6	0.00228288	0.00134349	0.00205573	0.0012934	0.764868	1.69921	26.9345	14.607	1.43031	1.16456	28	0.017316	0.116532	TRUE	FALSE
Acetylarginine	AcArg	m + 6	13C515N1	AcArg (m + 6)	Ratio6To0	Colon	5	6	5	6	0.00608282	0.00803985	0.00506181	0.00578766	-0.402427	0.756584	25.5382	29.3561	1.40719	1.4677	11	0.536797	0.742569	FALSE	FALSE
Acetylarginine	AcArg	m + 6	13C515N1	AcArg (m + 6)	Ratio6To0	Erythrocytes	5	6	5	6	0.00114442	0.00285293	0.00121699	0.00178898	-1.31783	0.401139	9.01455	16.8285	0.954944	1.22605	13	0.792208	0.882594	FALSE	FALSE
Acetylarginine	AcArg	m + 6	13C515N1	AcArg (m + 6)	Ratio6To0	Plasma	5	6	5	6	0.00157625	0.00333871	0.00103815	0.00345468	-1.08279	0.472114	20.7554	19.0516	1.31713	1.27993	4	0.0519481	0.226931	FALSE	FALSE
Acetylarginine	AcArg	m + 6	13C515N1	AcArg (m + 6)	Ratio6To0	Urine	4	6	4	6	0.00111603	0.00117469	0.00109194	0.00115268	-0.0738984	0.950067	719.221	296.026	2.85686	2.47133	12	1	1	FALSE	FALSE
Arginine	Arg	m + 8	13C515N3	Arg (m + 8)	Ratio8To0	Cortex	5	6	5	6	0.0625971	0.0448919	0.0538289	0.0452775	0.479639	1.39439	245012	135925	5.38919	5.1333	24	0.125541	0.390747	FALSE	FALSE
Arginine	Arg	m + 8	13C515N3	Arg (m + 8)	Ratio8To0	Medulla	5	6	5	6	0.0569925	0.0368554	0.0495879	0.037726	0.628896	1.54638	160132	113375	5.20448	5.05452	28	0.017316	0.116532	TRUE	FALSE
Arginine	Arg	m + 8	13C515N3	Arg (m + 8)	Ratio8To0	Liver	5	6	5	6	0.0282737	0.0149784	0.0323192	0.0154497	0.916578	1.88763	1491.28	610.56	3.17356	2.78573	26	0.0519481	0.226931	FALSE	FALSE
Arginine	Arg	m + 8	13C515N3	Arg (m + 8)	Ratio8To0	Heart	5	6	5	6	0.0295597	0.0320552	0.024392	0.0312662	-0.116929	0.922149	81474.1	73818.5	4.91102	4.86817	10	0.428571	0.662822	FALSE	FALSE
Arginine	Arg	m + 8	13C515N3	Arg (m + 8)	Ratio8To0	Muscle	5	6	5	6	0.028656	0.0301967	0.0232294	0.0294599	-0.0755542	0.948977	99913.5	151661	4.99962	5.18087	9	0.329004	0.602368	FALSE	FALSE
Arginine	Arg	m + 8	13C515N3	Arg (m + 8)	Ratio8To0	Brain	5	6	5	6	0.0159939	0.0140723	0.0153364	0.0147234	0.184661	1.13655	43857.5	43405.5	4.64204	4.63754	19	0.536797	0.742569	FALSE	FALSE
Arginine	Arg	m + 8	13C515N3	Arg (m + 8)	Ratio8To0	Lung	5	6	5	6	0.0304738	0.029355	0.026001	0.0294654	0.0539648	1.03811	72366.1	55375.4	4.85954	4.74332	12	0.662338	0.822554	FALSE	FALSE
Arginine	Arg	m + 8	13C515N3	Arg (m + 8)	Ratio8To0	Spleen	5	6	5	6	0.0399184	0.0343745	0.0339443	0.0328487	0.215716	1.16128	83647	77045	4.92245	4.88674	17	0.792208	0.882594	FALSE	FALSE
Arginine	Arg	m + 8	13C515N3	Arg (m + 8)	Ratio8To0	Duodenum	5	6	5	6	0.0438646	0.0436735	0.036624	0.0428652	0.00630156	1.00438	104215	88382.1	5.01793	4.94636	8	0.246753	0.509888	FALSE	FALSE
Arginine	Arg	m + 8	13C515N3	Arg (m + 8)	Ratio8To0	Jejunum	5	6	5	6	0.0414003	0.0386207	0.0313787	0.0371713	0.100267	1.07197	141206	88942.3	5.14985	4.94911	13	0.792208	0.882594	FALSE	FALSE
Arginine	Arg	m + 8	13C515N3	Arg (m + 8)	Ratio8To0	Ileum	5	6	5	6	0.0429292	0.0386141	0.0348137	0.039281	0.15283	1.11175	97688.3	92797.9	4.98984	4.96754	13	0.792208	0.882594	FALSE	FALSE
Arginine	Arg	m + 8	13C515N3	Arg (m + 8)	Ratio8To0	Colon	5	6	5	6	0.0361246	0.032928	0.0310144	0.0328645	0.133668	1.09708	56801.8	49772.8	4.75436	4.69699	13	0.792208	0.882594	FALSE	FALSE
Arginine	Arg	m + 8	13C515N3	Arg (m + 8)	Ratio8To0	Erythrocytes	5	6	5	6	0.028053	0.0299018	0.025612	0.0289852	-0.0920772	0.938171	88663.2	69473.4	4.94774	4.84182	8	0.246753	0.509888	FALSE	FALSE
Arginine	Arg	m + 8	13C515N3	Arg (m + 8)	Ratio8To0	Plasma	5	6	5	6	0.0436385	0.0394662	0.0371296	0.0400253	0.144985	1.10572	130038	118951	5.11407	5.07537	15	1	1	FALSE	FALSE
Arginine	Arg	m + 8	13C515N3	Arg (m + 8)	Ratio8To0	Urine	4	6	4	6	0.0123691	0.091009	0.00196604	0.0719805	-2.87927	0.13591	15353.3	19024.9	4.1862	4.27932	4	0.114286	0.390747	FALSE	FALSE
Monomethylarginine	MMA	m + 8	13C515N3	MMA (m + 8)	Ratio8To0	Cortex	5	6	5	6	0.0265791	0.0230665	0.0227583	0.0219669	0.204494	1.15228	792.075	932.45	2.89877	2.96963	20	0.428571	0.662822	FALSE	FALSE
Monomethylarginine	MMA	m + 8	13C515N3	MMA (m + 8)	Ratio8To0	Medulla	5	6	5	6	0.026255	0.0191684	0.0265596	0.0188453	0.453861	1.3697	502.482	848.961	2.70112	2.92889	28	0.017316	0.116532	TRUE	FALSE
Monomethylarginine	MMA	m + 8	13C515N3	MMA (m + 8)	Ratio8To0	Liver	5	6	5	6	0.0380505	0.0407033	0.0353897	0.0422993	-0.0972278	0.934828	798.575	609.946	2.90232	2.78529	9	0.329004	0.602368	FALSE	FALSE
Monomethylarginine	MMA	m + 8	13C515N3	MMA (m + 8)	Ratio8To0	Heart	5	6	5	6	0.0214966	0.0193018	0.0173816	0.019503	0.155376	1.11371	761.298	430.438	2.88155	2.63391	14	0.930736	0.969679	FALSE	FALSE
Monomethylarginine	MMA	m + 8	13C515N3	MMA (m + 8)	Ratio8To0	Muscle	5	6	5	6	0.0251065	0.028363	0.0203377	0.0276608	-0.175948	0.885186	871.03	1473.9	2.94003	3.16847	9	0.329004	0.602368	FALSE	FALSE
Monomethylarginine	MMA	m + 8	13C515N3	MMA (m + 8)	Ratio8To0	Brain	5	6	5	6	0.00632446	0.00383187	0.00644627	0.00410846	0.722893	1.65049	87.2702	54.2696	1.94087	1.73456	25	0.0822511	0.294684	FALSE	FALSE
Monomethylarginine	MMA	m + 8	13C515N3	MMA (m + 8)	Ratio8To0	Lung	5	6	5	6	0.0128832	0.0156151	0.0121517	0.015488	-0.277458	0.825043	320.75	327.805	2.50617	2.51561	5	0.0822511	0.294684	FALSE	FALSE
Monomethylarginine	MMA	m + 8	13C515N3	MMA (m + 8)	Ratio8To0	Spleen	5	6	5	6	0.02967	0.0259146	0.0232755	0.0270679	0.19524	1.14491	566.501	476.911	2.7532	2.67844	15	1	1	FALSE	FALSE
Monomethylarginine	MMA	m + 8	13C515N3	MMA (m + 8)	Ratio8To0	Duodenum	5	6	5	6	0.0285538	0.0275358	0.0255767	0.0268696	0.0523769	1.03697	328.27	204.122	2.51623	2.30989	15	1	1	FALSE	FALSE
Monomethylarginine	MMA	m + 8	13C515N3	MMA (m + 8)	Ratio8To0	Jejunum	5	6	5	6	0.0295899	0.0267464	0.0243413	0.0254434	0.145759	1.10631	2755	1678.76	3.44012	3.22499	13	0.792208	0.882594	FALSE	FALSE
Monomethylarginine	MMA	m + 8	13C515N3	MMA (m + 8)	Ratio8To0	Ileum	5	6	5	6	0.039871	0.0404439	0.0430581	0.0385026	-0.0205825	0.985835	493.059	411.29	2.6929	2.61415	15	1	1	FALSE	FALSE
Monomethylarginine	MMA	m + 8	13C515N3	MMA (m + 8)	Ratio8To0	Colon	5	6	5	6	0.0238208	0.022394	0.0235114	0.0225186	0.0891112	1.06371	399.103	294.615	2.60108	2.46926	16	0.930736	0.969679	FALSE	FALSE
Monomethylarginine	MMA	m + 8	13C515N3	MMA (m + 8)	Ratio8To0	Erythrocytes	5	6	5	6	0.020156	0.0178403	0.0163702	0.0168791	0.176068	1.1298	846.02	842.854	2.92738	2.92575	15	1	1	FALSE	FALSE
Monomethylarginine	MMA	m + 8	13C515N3	MMA (m + 8)	Ratio8To0	Plasma	5	6	5	6	0.0240996	0.0233101	0.0214102	0.0227603	0.0480536	1.03387	2557.47	2306.14	3.40781	3.36289	12	0.662338	0.822554	FALSE	FALSE
Monomethylarginine	MMA	m + 8	13C515N3	MMA (m + 8)	Ratio8To0	Urine	4	6	4	6	0.0950962	0.0851457	0.0953509	0.0485186	0.159454	1.11686	2980.19	2410.05	3.47424	3.38203	20	0.114286	0.390747	FALSE	FALSE
Agmatine	Agm	m + 9	13C515N4	Agm (m + 9)	Ratio9To0	Cortex	5	6	5	6	0.828486	0.0926874	0.542356	0.0850659	3.16003	8.93849	659.489	83.4564	2.81921	1.92146	30	0.004329	0.0552781	TRUE	FALSE
Agmatine	Agm	m + 9	13C515N4	Agm (m + 9)	Ratio9To0	Medulla	5	6	5	6	1.52434	0.301886	1.34128	0.29175	2.33611	5.04939	558.124	98.9134	2.74673	1.99526	30	0.004329	0.0552781	TRUE	FALSE
Agmatine	Agm	m + 9	13C515N4	Agm (m + 9)	Ratio9To0	Liver	5	6	5	6	3.48635	16.035	2.1518	6.14586	-2.20144	0.217421	537.98	634.916	2.73077	2.80272	8	0.246753	0.509888	FALSE	FALSE
Agmatine	Agm	m + 9	13C515N4	Agm (m + 9)	Ratio9To0	Heart	5	6	5	6	0.678332	0.688408	0.744267	0.798552	-0.0212728	0.985363	199.929	144	2.30088	2.15836	15	1	1	FALSE	FALSE
Agmatine	Agm	m + 9	13C515N4	Agm (m + 9)	Ratio9To0	Muscle	5	6	5	6	0.242843	0.0476458	0.149921	0.0268206	2.34961	5.09685	226.501	54.9121	2.35507	1.73967	25	0.0822511	0.294684	FALSE	FALSE
Agmatine	Agm	m + 9	13C515N4	Agm (m + 9)	Ratio9To0	Brain	5	6	5	6	0.11559	0.0663969	0.0770243	0.0735718	0.799826	1.74089	158.932	99.0466	2.20121	1.99584	20	0.428571	0.662822	FALSE	FALSE
Agmatine	Agm	m + 9	13C515N4	Agm (m + 9)	Ratio9To0	Lung	5	6	5	6	0.15715	0.126091	0.110401	0.139799	0.317679	1.24632	279.118	253.824	2.44579	2.40453	11	0.536797	0.742569	FALSE	FALSE
Agmatine	Agm	m + 9	13C515N4	Agm (m + 9)	Ratio9To0	Spleen	5	6	5	6	0.827647	0.337581	0.292376	0.294317	1.29378	2.4517	282.917	114.682	2.45166	2.0595	21	0.329004	0.602368	FALSE	FALSE
Agmatine	Agm	m + 9	13C515N4	Agm (m + 9)	Ratio9To0	Duodenum	5	6	5	6	7.37465	16.5144	3.19094	12.3413	-1.16308	0.446559	9948.38	5046.53	3.99775	3.70299	7	0.177489	0.45328	FALSE	FALSE
Agmatine	Agm	m + 9	13C515N4	Agm (m + 9)	Ratio9To0	Jejunum	5	6	5	6	1.6734	0.503829	1.56172	0.510166	1.73177	3.32136	3001.87	1715.16	3.47739	3.2343	27	0.030303	0.157197	TRUE	FALSE
Agmatine	Agm	m + 9	13C515N4	Agm (m + 9)	Ratio9To0	Ileum	5	6	5	6	5.19342	3.59425	4.2177	1.52233	0.530993	1.44492	2169.02	908.177	3.33626	2.95817	19	0.536797	0.742569	FALSE	FALSE
Agmatine	Agm	m + 9	13C515N4	Agm (m + 9)	Ratio9To0	Colon	5	6	5	6	0.675604	1.01532	0.560082	0.616646	-0.587686	0.665409	735.614	2461.78	2.86665	3.39125	16	0.930736	0.969679	FALSE	FALSE
Agmatine	Agm	m + 9	13C515N4	Agm (m + 9)	Ratio9To0	Erythrocytes	5	6	5	6	0.565321	0.0406376	0.157093	0.0404804	3.79818	13.9113	778.292	82.469	2.89114	1.91629	30	0.004329	0.0552781	TRUE	FALSE
Agmatine	Agm	m + 9	13C515N4	Agm (m + 9)	Ratio9To0	Plasma	5	6	5	6	2.50438	0.428666	1.35607	0.346237	2.54653	5.84227	3076.2	543.168	3.48801	2.73493	28	0.017316	0.116532	TRUE	FALSE
Agmatine	Agm	m + 9	13C515N4	Agm (m + 9)	Ratio9To0	Urine	4	6	4	6	28.9405	13.7865	19.9222	11.0737	1.06984	2.0992	38330.1	54917.3	4.58354	4.73971	14	0.761905	0.882594	FALSE	FALSE
Acetylarginine	AcArg	m + 10	13C615N4	AcArg (m + 10)	Ratio10To0	Cortex	5	6	5	6	0.00893296	0.00413744	0.00705425	0.00385151	1.1104	2.15906	601.689	35.2922	2.77937	1.54768	28	0.017316	0.116532	TRUE	FALSE
Acetylarginine	AcArg	m + 10	13C615N4	AcArg (m + 10)	Ratio10To0	Medulla	5	6	5	6	0.00761865	0.00295882	0.00688221	0.00296879	1.36452	2.5749	465.344	26.4193	2.66777	1.42192	30	0.004329	0.0552781	TRUE	FALSE
Acetylarginine	AcArg	m + 10	13C615N4	AcArg (m + 10)	Ratio10To0	Liver	5	6	5	6	0.00515776	0.0029503	0.00532926	0.00305553	0.805885	1.74822	32.8819	11.8138	1.51696	1.07239	22	0.246753	0.509888	FALSE	FALSE
Acetylarginine	AcArg	m + 10	13C615N4	AcArg (m + 10)	Ratio10To0	Heart	5	6	5	6	0.00421861	0.00479443	0.00483093	0.00468541	-0.184591	0.879899	3.87063	3.39316	0.587782	0.530605	13	0.792208	0.882594	FALSE	FALSE
Acetylarginine	AcArg	m + 10	13C615N4	AcArg (m + 10)	Ratio10To0	Muscle	5	6	5	6	0.00102692	0.00383369	0.000250121	0.00298148	-1.90041	0.267868	1.64292	9.51436	0.215615	0.978379	3	0.030303	0.157197	TRUE	FALSE
Acetylarginine	AcArg	m + 10	13C615N4	AcArg (m + 10)	Ratio10To0	Brain	5	6	5	6	0.00164475	0.00265836	0.00154725	0.00231361	-0.692671	0.618707	35.0152	33.3084	1.54426	1.52255	4	0.0519481	0.226931	FALSE	FALSE
Acetylarginine	AcArg	m + 10	13C615N4	AcArg (m + 10)	Ratio10To0	Lung	5	6	5	6	0.00155821	0.00150247	0.00151202	0.00147626	0.0525527	1.0371	24.276	18.0207	1.38518	1.25577	17	0.792208	0.882594	FALSE	FALSE
Acetylarginine	AcArg	m + 10	13C615N4	AcArg (m + 10)	Ratio10To0	Spleen	5	6	5	6	0.00491864	0.0049973	0.00496758	0.00485636	-0.0228906	0.984259	83.9855	58.3695	1.9242	1.76619	16	0.930736	0.969679	FALSE	FALSE
Acetylarginine	AcArg	m + 10	13C615N4	AcArg (m + 10)	Ratio10To0	Duodenum	5	6	5	6	0.0178433	0.0201276	0.021451	0.0161976	-0.173793	0.886509	293.936	406.28	2.46825	2.60883	14	0.930736	0.969679	FALSE	FALSE
Acetylarginine	AcArg	m + 10	13C615N4	AcArg (m + 10)	Ratio10To0	Jejunum	5	6	5	6	0.00834486	0.00866685	0.00909867	0.00779282	-0.0546195	0.962848	96.7714	79.126	1.98575	1.89832	14	0.930736	0.969679	FALSE	FALSE
Acetylarginine	AcArg	m + 10	13C615N4	AcArg (m + 10)	Ratio10To0	Ileum	5	6	5	6	0.00507694	0.00657682	0.00398724	0.0065642	-0.373431	0.771944	66.1287	72.8079	1.82039	1.86218	7	0.177489	0.45328	FALSE	FALSE
Acetylarginine	AcArg	m + 10	13C615N4	AcArg (m + 10)	Ratio10To0	Colon	5	6	5	6	0.00227165	0.00261482	0.00228389	0.00207432	-0.202972	0.868759	9.16568	9.29504	0.962165	0.968251	15	1	1	FALSE	FALSE
Acetylarginine	AcArg	m + 10	13C615N4	AcArg (m + 10)	Ratio10To0	Erythrocytes	5	6	5	6	0.00445287	0.00261593	0.00435504	0.00303682	0.767409	1.70221	35.8254	31.1335	1.55419	1.49323	22	0.246753	0.509888	FALSE	FALSE
Acetylarginine	AcArg	m + 10	13C615N4	AcArg (m + 10)	Ratio10To0	Plasma	5	6	5	6	0.00616899	0.0074213	0.00602798	0.00553879	-0.266638	0.831254	85.2134	42.3904	1.93051	1.62727	14	0.930736	0.969679	FALSE	FALSE
Acetylarginine	AcArg	m + 10	13C615N4	AcArg (m + 10)	Ratio10To0	Urine	4	6	4	6	0.00301391	0.00756997	0.00303432	0.00622074	-1.32865	0.39814	1895.06	1871.78	3.27762	3.27225	0	0.00952381	0.0817734	TRUE	FALSE
Monomethylarginine	MMA	m + 10	13C615N4	MMA (m + 10)	Ratio10To0	Cortex	5	6	5	6	0.113734	0.140191	0.101806	0.143644	-0.301733	0.811277	3361.23	5753.48	3.5265	3.75993	6	0.125541	0.390747	FALSE	FALSE
Monomethylarginine	MMA	m + 10	13C615N4	MMA (m + 10)	Ratio10To0	Medulla	5	6	5	6	0.153687	0.161281	0.129739	0.170066	-0.069584	0.952913	2972.91	7031.48	3.47318	3.84705	13	0.792208	0.882594	FALSE	FALSE
Monomethylarginine	MMA	m + 10	13C615N4	MMA (m + 10)	Ratio10To0	Liver	5	6	5	6	0.116637	0.12747	0.0893441	0.118372	-0.128132	0.915016	2136.62	1787.43	3.32973	3.25223	11	0.536797	0.742569	FALSE	FALSE
Monomethylarginine	MMA	m + 10	13C615N4	MMA (m + 10)	Ratio10To0	Heart	5	6	5	6	0.214869	0.261449	0.19774	0.251708	-0.283072	0.821839	7660.64	5763.18	3.88427	3.76066	8	0.246753	0.509888	FALSE	FALSE
Monomethylarginine	MMA	m + 10	13C615N4	MMA (m + 10)	Ratio10To0	Muscle	5	6	5	6	0.238718	0.288079	0.216783	0.291719	-0.271156	0.828655	8211.83	14594.4	3.91444	4.16419	9	0.329004	0.602368	FALSE	FALSE
Monomethylarginine	MMA	m + 10	13C615N4	MMA (m + 10)	Ratio10To0	Brain	5	6	5	6	0.0436912	0.0458794	0.0397748	0.0463506	-0.0705037	0.952305	602.051	645.742	2.77963	2.81006	13	0.792208	0.882594	FALSE	FALSE
Monomethylarginine	MMA	m + 10	13C615N4	MMA (m + 10)	Ratio10To0	Lung	5	6	5	6	0.148475	0.180695	0.141698	0.18837	-0.283332	0.821691	3564.53	4024.77	3.552	3.60474	8	0.246753	0.509888	FALSE	FALSE
Monomethylarginine	MMA	m + 10	13C615N4	MMA (m + 10)	Ratio10To0	Spleen	5	6	5	6	0.224572	0.26426	0.187175	0.256383	-0.234779	0.849815	4551.08	4944.44	3.65811	3.69412	10	0.428571	0.662822	FALSE	FALSE
Monomethylarginine	MMA	m + 10	13C615N4	MMA (m + 10)	Ratio10To0	Duodenum	5	6	5	6	0.317125	0.419223	0.312799	0.399951	-0.402663	0.756461	3580.53	3122.2	3.55395	3.49446	2	0.017316	0.116532	TRUE	FALSE
Monomethylarginine	MMA	m + 10	13C615N4	MMA (m + 10)	Ratio10To0	Jejunum	5	6	5	6	0.339939	0.367683	0.240734	0.355982	-0.113187	0.924543	32247.4	22285.9	4.5085	4.34803	12	0.662338	0.822554	FALSE	FALSE
Monomethylarginine	MMA	m + 10	13C615N4	MMA (m + 10)	Ratio10To0	Ileum	5	6	5	6	0.269357	0.311175	0.27358	0.306123	-0.208204	0.865614	3368.45	3298.74	3.52743	3.51835	7	0.177489	0.45328	FALSE	FALSE
Monomethylarginine	MMA	m + 10	13C615N4	MMA (m + 10)	Ratio10To0	Colon	5	6	5	6	0.171336	0.293646	0.163265	0.242355	-0.777244	0.58348	2747.93	3860.71	3.43901	3.58667	4	0.0519481	0.226931	FALSE	FALSE
Monomethylarginine	MMA	m + 10	13C615N4	MMA (m + 10)	Ratio10To0	Erythrocytes	5	6	5	6	0.209776	0.238348	0.19643	0.239883	-0.184221	0.880124	8850.2	11314.6	3.94695	4.05364	10	0.428571	0.662822	FALSE	FALSE
Monomethylarginine	MMA	m + 10	13C615N4	MMA (m + 10)	Ratio10To0	Plasma	5	6	5	6	0.244251	0.298109	0.230541	0.298546	-0.287478	0.819333	26482.8	29482.9	4.42296	4.46957	10	0.428571	0.662822	FALSE	FALSE
Monomethylarginine	MMA	m + 10	13C615N4	MMA (m + 10)	Ratio10To0	Urine	4	6	4	6	0.20601	0.250812	0.210018	0.281317	-0.283893	0.821372	6591.27	10083.6	3.81897	4.00362	7	0.352381	0.642805	FALSE	FALSE
Asymmetric dimethylarginine	ADMA	m + 10	13C615N4	ADMA (m + 10)	Ratio10To0	Cortex	5	6	5	6	0.318998	0.367299	0.313604	0.37034	-0.203408	0.868497	352992	356407	5.54777	5.55195	11	0.536797	0.742569	FALSE	FALSE
Asymmetric dimethylarginine	ADMA	m + 10	13C615N4	ADMA (m + 10)	Ratio10To0	Medulla	5	6	5	6	0.372823	0.388763	0.329737	0.391961	-0.0604025	0.958997	326247	433360	5.51355	5.63685	12	0.662338	0.822554	FALSE	FALSE
Asymmetric dimethylarginine	ADMA	m + 10	13C615N4	ADMA (m + 10)	Ratio10To0	Liver	5	6	5	6	0.19699	0.200794	0.149273	0.19325	-0.0275944	0.981055	89407.1	58549.5	4.95137	4.76752	12	0.662338	0.822554	FALSE	FALSE
Asymmetric dimethylarginine	ADMA	m + 10	13C615N4	ADMA (m + 10)	Ratio10To0	Heart	5	6	5	6	0.463495	0.550315	0.420177	0.551441	-0.247703	0.842236	306963	203469	5.48709	5.3085	10	0.428571	0.662822	FALSE	FALSE
Asymmetric dimethylarginine	ADMA	m + 10	13C615N4	ADMA (m + 10)	Ratio10To0	Muscle	5	6	5	6	0.4565	0.538793	0.405161	0.534617	-0.239117	0.847264	268867	282317	5.42954	5.45074	9	0.329004	0.602368	FALSE	FALSE
Asymmetric dimethylarginine	ADMA	m + 10	13C615N4	ADMA (m + 10)	Ratio10To0	Brain	5	6	5	6	0.148104	0.198035	0.13817	0.197398	-0.419146	0.747867	30958.8	31048.6	4.49078	4.49204	2	0.017316	0.116532	TRUE	FALSE
Asymmetric dimethylarginine	ADMA	m + 10	13C615N4	ADMA (m + 10)	Ratio10To0	Lung	5	6	5	6	0.410026	0.471765	0.376653	0.464057	-0.202354	0.869131	216595	240696	5.33565	5.38147	12	0.662338	0.822554	FALSE	FALSE
Asymmetric dimethylarginine	ADMA	m + 10	13C615N4	ADMA (m + 10)	Ratio10To0	Spleen	5	6	5	6	0.478885	0.57663	0.405033	0.580205	-0.267967	0.830489	379026	387630	5.57867	5.58842	9	0.329004	0.602368	FALSE	FALSE
Asymmetric dimethylarginine	ADMA	m + 10	13C615N4	ADMA (m + 10)	Ratio10To0	Duodenum	5	6	5	6	0.593202	0.800279	0.499964	0.77664	-0.431982	0.741243	251788	208542	5.40104	5.31919	4	0.0519481	0.226931	FALSE	FALSE
Asymmetric dimethylarginine	ADMA	m + 10	13C615N4	ADMA (m + 10)	Ratio10To0	Jejunum	5	6	5	6	0.54775	0.678827	0.493333	0.667965	-0.309527	0.806906	198231	177535	5.29717	5.24928	8	0.246753	0.509888	FALSE	FALSE
Asymmetric dimethylarginine	ADMA	m + 10	13C615N4	ADMA (m + 10)	Ratio10To0	Ileum	5	6	5	6	0.513815	0.628487	0.440393	0.634906	-0.290636	0.817542	153150	161331	5.18512	5.20772	7	0.177489	0.45328	FALSE	FALSE
Asymmetric dimethylarginine	ADMA	m + 10	13C615N4	ADMA (m + 10)	Ratio10To0	Colon	5	6	5	6	0.45752	0.580563	0.405867	0.562314	-0.343617	0.788063	121022	130056	5.08287	5.11413	7	0.177489	0.45328	FALSE	FALSE
Asymmetric dimethylarginine	ADMA	m + 10	13C615N4	ADMA (m + 10)	Ratio10To0	Erythrocytes	5	6	5	6	0.404453	0.451756	0.382021	0.450462	-0.159571	0.895291	178894	99006.7	5.2526	4.99566	11	0.536797	0.742569	FALSE	FALSE
Asymmetric dimethylarginine	ADMA	m + 10	13C615N4	ADMA (m + 10)	Ratio10To0	Plasma	5	6	5	6	0.460939	0.568366	0.415443	0.571676	-0.302245	0.810989	282286	273274	5.45069	5.4366	8	0.246753	0.509888	FALSE	FALSE
Asymmetric dimethylarginine	ADMA	m + 10	13C615N4	ADMA (m + 10)	Ratio10To0	Urine	4	6	4	6	0.410488	0.559771	0.372992	0.559448	-0.447495	0.733315	1.72651e+06	3.71005e+06	6.23717	6.56938	4	0.114286	0.390747	FALSE	FALSE
Citrate	Cit	m + 4	13C4	Cit (m + 4)	Ratio4To0	Cortex	5	6	5	6	0.000626516	0.000307616	0.000649886	0.000322749	1.02622	2.03668	486.453	142.064	2.68704	2.15248	30	0.004329	0.0552781	TRUE	FALSE
Citrate	Cit	m + 4	13C4	Cit (m + 4)	Ratio4To0	Medulla	5	6	5	6	0.000512934	0.000250006	0.000537858	0.000261899	1.03681	2.05168	640.159	436.475	2.80629	2.63996	30	0.004329	0.0552781	TRUE	FALSE
Citrate	Cit	m + 4	13C4	Cit (m + 4)	Ratio4To0	Liver	5	6	5	6	0.00056577	0.000653442	0.000540997	0.000714663	-0.207842	0.865832	78.6534	58.2671	1.89572	1.76542	10	0.428571	0.662822	FALSE	FALSE
Citrate	Cit	m + 4	13C4	Cit (m + 4)	Ratio4To0	Heart	5	6	5	6	8.73715e-05	6.08887e-05	6.40074e-05	6.13025e-05	0.520989	1.43494	100.871	100.025	2.00377	2.00011	16	0.930736	0.969679	FALSE	FALSE
Citrate	Cit	m + 4	13C4	Cit (m + 4)	Ratio4To0	Muscle	0	0	0	0														FALSE	FALSE
Citrate	Cit	m + 4	13C4	Cit (m + 4)	Ratio4To0	Brain	0	0	0	0														FALSE	FALSE
Citrate	Cit	m + 4	13C4	Cit (m + 4)	Ratio4To0	Lung	0	0	0	0														FALSE	FALSE
Citrate	Cit	m + 4	13C4	Cit (m + 4)	Ratio4To0	Spleen	0	0	0	0														FALSE	FALSE
Citrate	Cit	m + 4	13C4	Cit (m + 4)	Ratio4To0	Duodenum	0	0	0	0														FALSE	FALSE
Citrate	Cit	m + 4	13C4	Cit (m + 4)	Ratio4To0	Jejunum	0	0	0	0														FALSE	FALSE
Citrate	Cit	m + 4	13C4	Cit (m + 4)	Ratio4To0	Ileum	0	0	0	0														FALSE	FALSE
Citrate	Cit	m + 4	13C4	Cit (m + 4)	Ratio4To0	Colon	0	0	0	0														FALSE	FALSE
Citrate	Cit	m + 4	13C4	Cit (m + 4)	Ratio4To0	Erythrocytes	0	0	0	0														FALSE	FALSE
Citrate	Cit	m + 4	13C4	Cit (m + 4)	Ratio4To0	Plasma	5	6	5	6	0.00158789	0.00162867	0.00114039	0.00147554	-0.0365868	0.974959	34.0196	30.3191	1.53173	1.48172	14	0.930736	0.969679	FALSE	FALSE
Citrate	Cit	m + 4	13C4	Cit (m + 4)	Ratio4To0	Urine	4	6	4	6	0.0001918	6.79607e-05	0.000193575	4.79944e-05	1.49683	2.82223	159.895	108.244	2.20383	2.0344	21	0.0666667	0.283761	FALSE	FALSE
Malate	Mal	m + 4	13C4	Mal (m + 4)	Ratio4To0	Cortex	5	6	5	6	0.00325988	0.00158102	0.00327899	0.00170042	1.04396	2.06188	6298.23	1222.72	3.79922	3.08733	30	0.004329	0.0552781	TRUE	FALSE
Malate	Mal	m + 4	13C4	Mal (m + 4)	Ratio4To0	Medulla	5	6	5	6	0.00296807	0.00133629	0.00310587	0.00138538	1.1513	2.22113	8762.63	2413.4	3.94263	3.38263	30	0.004329	0.0552781	TRUE	FALSE
Malate	Mal	m + 4	13C4	Mal (m + 4)	Ratio4To0	Liver	5	6	5	6	0.00441044	0.00331277	0.00392767	0.00287237	0.412882	1.33134	3686.02	2805.82	3.56656	3.44806	20	0.428571	0.662822	FALSE	FALSE
Malate	Mal	m + 4	13C4	Mal (m + 4)	Ratio4To0	Heart	5	6	5	6	0.000305956	0.000266535	0.000308172	0.000291063	0.198997	1.1479	1554.99	1114.38	3.19173	3.04703	20	0.428571	0.662822	FALSE	FALSE
Malate	Mal	m + 4	13C4	Mal (m + 4)	Ratio4To0	Muscle	0	0	0	0														FALSE	FALSE
Malate	Mal	m + 4	13C4	Mal (m + 4)	Ratio4To0	Brain	0	0	0	0														FALSE	FALSE
Malate	Mal	m + 4	13C4	Mal (m + 4)	Ratio4To0	Lung	0	0	0	0														FALSE	FALSE
Malate	Mal	m + 4	13C4	Mal (m + 4)	Ratio4To0	Spleen	0	0	0	0														FALSE	FALSE
Malate	Mal	m + 4	13C4	Mal (m + 4)	Ratio4To0	Duodenum	0	0	0	0														FALSE	FALSE
Malate	Mal	m + 4	13C4	Mal (m + 4)	Ratio4To0	Jejunum	0	0	0	0														FALSE	FALSE
Malate	Mal	m + 4	13C4	Mal (m + 4)	Ratio4To0	Ileum	0	0	0	0														FALSE	FALSE
Malate	Mal	m + 4	13C4	Mal (m + 4)	Ratio4To0	Colon	0	0	0	0														FALSE	FALSE
Malate	Mal	m + 4	13C4	Mal (m + 4)	Ratio4To0	Erythrocytes	0	0	0	0														FALSE	FALSE
Malate	Mal	m + 4	13C4	Mal (m + 4)	Ratio4To0	Plasma	5	6	5	6	0.00242391	0.0023461	0.00229284	0.00224366	0.0470734	1.03317	1978.63	1334.74	3.29637	3.1254	17	0.792208	0.882594	FALSE	FALSE
Malate	Mal	m + 4	13C4	Mal (m + 4)	Ratio4To0	Urine	4	6	4	6	0.00316581	0.00525107	0.00324338	0.00482827	-0.730036	0.602889	166.684	136.61	2.22189	2.13548	6	0.257143	0.526984	FALSE	FALSE
Glucose	Gluc	m + 3	13C3	Gluc (m + 3)	Ratio3To0	Cortex	5	6	5	6	0.00173913	0.00152134	0.00174447	0.00157492	0.193024	1.14316	479.118	105.274	2.68044	2.02232	20	0.428571	0.662822	FALSE	FALSE
Glucose	Gluc	m + 3	13C3	Gluc (m + 3)	Ratio3To0	Medulla	5	6	5	6	0.00141255	0.00108837	0.00131998	0.00114149	0.376129	1.29786	441.881	138.495	2.6453	2.14143	22	0.246753	0.509888	FALSE	FALSE
Glucose	Gluc	m + 3	13C3	Gluc (m + 3)	Ratio3To0	Liver	5	6	5	6	0.0012546	0.000922989	0.00118683	0.000912736	0.442844	1.35928	380.162	335.057	2.57997	2.52512	30	0.004329	0.0552781	TRUE	FALSE
Glucose	Gluc	m + 3	13C3	Gluc (m + 3)	Ratio3To0	Heart	5	6	5	6	0.00104124	0.000835161	0.00100242	0.000850617	0.31817	1.24675	494.866	348.443	2.69449	2.54213	29	0.00865801	0.0817734	TRUE	FALSE
Glucose	Gluc	m + 3	13C3	Gluc (m + 3)	Ratio3To0	Muscle	0	0	0	0														FALSE	FALSE
Glucose	Gluc	m + 3	13C3	Gluc (m + 3)	Ratio3To0	Brain	0	0	0	0														FALSE	FALSE
Glucose	Gluc	m + 3	13C3	Gluc (m + 3)	Ratio3To0	Lung	0	0	0	0														FALSE	FALSE
Glucose	Gluc	m + 3	13C3	Gluc (m + 3)	Ratio3To0	Spleen	0	0	0	0														FALSE	FALSE
Glucose	Gluc	m + 3	13C3	Gluc (m + 3)	Ratio3To0	Duodenum	0	0	0	0														FALSE	FALSE
Glucose	Gluc	m + 3	13C3	Gluc (m + 3)	Ratio3To0	Jejunum	0	0	0	0														FALSE	FALSE
Glucose	Gluc	m + 3	13C3	Gluc (m + 3)	Ratio3To0	Ileum	0	0	0	0														FALSE	FALSE
Glucose	Gluc	m + 3	13C3	Gluc (m + 3)	Ratio3To0	Colon	0	0	0	0														FALSE	FALSE
Glucose	Gluc	m + 3	13C3	Gluc (m + 3)	Ratio3To0	Erythrocytes	0	0	0	0														FALSE	FALSE
Glucose	Gluc	m + 3	13C3	Gluc (m + 3)	Ratio3To0	Plasma	5	6	5	6	0.00118527	0.00107362	0.0011027	0.00111886	0.142736	1.104	909.486	892.963	2.9588	2.95083	17	0.792208	0.882594	FALSE	FALSE
Glucose	Gluc	m + 3	13C3	Gluc (m + 3)	Ratio3To0	Urine	4	6	4	6	0.00263342	0.00276948	0.00288416	0.00214123	-0.072675	0.950873	31.6663	49.7735	1.5006	1.697	14	0.761905	0.882594	FALSE	FALSE
