# Supplementary material for: Diversion of Arginine’s dietary metabolic fate in proteinuric kidney disease
Source: Research Square preprint supplement (doi:10.21203/rs.3.rs-9927381/v1), 2026-06-17
Supplement: Supplementary file 7 [file 3be8bca4e0457f754c70928a.xlsx]

## Sheet: Sheet1
Segment	Segment_abbrev	Metabolite	Metabolite_abbrev	mass_difference	Isotope_label	Metabolite_mass_diff	Mean_12CArg	Mean_13CArg	log10_13CArg_over_12CArg	P_value	N_12CArg	N_13CArg
Glomerulus	Glom	Arginine	Arg	m + 6	13C6	Arg (m + 6)	380.025	135955	2.55358	0.0001554	8	8
Glomerulus	Glom	Ornithine	Orn	m + 5	13C5	Orn (m + 5)	29.8004	951.663	1.50426	0.0001554	8	8
Glomerulus	Glom	Urea	Urea	m + 1	13C1	Urea (m + 1)	7049.14	10820	0.18609	0.160528	8	8
Glomerulus	Glom	Citrulline	Cit	m + 6	13C6	Cit (m + 6)	92.44	90.5882	-0.00878812	1	8	8
Glomerulus	Glom	Proline	Pro	m + 5	13C5	Pro (m + 5)	3.38558	172.446	1.70702	0.0001554	8	8
Glomerulus	Glom	Glutamate	Glu	m + 5	13C5	Glu (m + 5)	4.41578	103.598	1.37034	0.0001554	8	8
Glomerulus	Glom	Glutamine	Gln	m + 5	13C5	Gln (m + 5)	24.657	42.3792	0.235213	0.130381	8	8
Glomerulus	Glom	Aspartate	Asp	m + 4	13C4	Asp (m + 4)	7.30399	18.8213	0.411089	0.0010878	8	8
Glomerulus	Glom	Guanidinoacetate	Guan	m + 1	13C1	Guan (m + 1)	27.6805	212.542	0.88527	0.0001554	8	8
Glomerulus	Glom	Agmatine	Agm	m + 5	13C5	Agm (m + 5)	10.4897	173.344	1.21814	0.0001554	8	8
Glomerulus	Glom	Monomethylarginine	MMA	m + 6	13C6	MMA (m + 6)	3.71506	5.1863	0.144891	0.328205	8	8
Glomerulus	Glom	Asymmetric dimethylarginine	ADMA	m + 6	13C6	ADMA (m + 6)	16.3943	15.7027	-0.0187163	0.95913	8	8
Glomerulus	Glom	Acetylarginine	AcArg	m + 6	13C6	AcArg (m + 6)	7.89885	10.075	0.105681	0.441803	8	8
Proximal Convoluted Tubule	PCT	Arginine	Arg	m + 6	13C6	Arg (m + 6)	241.274	57255.1	2.3753	0.0001554	8	8
Proximal Convoluted Tubule	PCT	Ornithine	Orn	m + 5	13C5	Orn (m + 5)	46.0667	603.54	1.11732	0.0010878	8	8
Proximal Convoluted Tubule	PCT	Urea	Urea	m + 1	13C1	Urea (m + 1)	8537.02	9231.05	0.0339449	0.505361	8	8
Proximal Convoluted Tubule	PCT	Citrulline	Cit	m + 6	13C6	Cit (m + 6)	68.9437	100.011	0.161554	0.441803	8	8
Proximal Convoluted Tubule	PCT	Proline	Pro	m + 5	13C5	Pro (m + 5)	3.32827	5.1989	0.193693	0.130381	8	8
Proximal Convoluted Tubule	PCT	Glutamate	Glu	m + 5	13C5	Glu (m + 5)	4.68965	20.8037	0.647001	0.000621601	8	8
Proximal Convoluted Tubule	PCT	Glutamine	Gln	m + 5	13C5	Gln (m + 5)	41.0426	39.1093	-0.0209548	1	8	8
Proximal Convoluted Tubule	PCT	Aspartate	Asp	m + 4	13C4	Asp (m + 4)	7.56756	12.6953	0.224688	0.382284	8	8
Proximal Convoluted Tubule	PCT	Guanidinoacetate	Guan	m + 1	13C1	Guan (m + 1)	169.292	4520.55	1.42656	0.004662	8	8
Proximal Convoluted Tubule	PCT	Agmatine	Agm	m + 5	13C5	Agm (m + 5)	6.31155	57.58	0.960136	0.0001554	8	8
Proximal Convoluted Tubule	PCT	Monomethylarginine	MMA	m + 6	13C6	MMA (m + 6)	4.91594	6.47819	0.119847	0.278632	8	8
Proximal Convoluted Tubule	PCT	Asymmetric dimethylarginine	ADMA	m + 6	13C6	ADMA (m + 6)	14.4533	13.9386	-0.0157485	0.720901	8	8
Proximal Convoluted Tubule	PCT	Acetylarginine	AcArg	m + 6	13C6	AcArg (m + 6)	6.74158	5.67366	-0.0748982	0.505361	8	8
Proximal Straight Tubule	PST	Arginine	Arg	m + 6	13C6	Arg (m + 6)	106.714	135907	3.10502	0.0001554	8	8
Proximal Straight Tubule	PST	Ornithine	Orn	m + 5	13C5	Orn (m + 5)	30.8392	753.024	1.38771	0.0104118	8	8
Proximal Straight Tubule	PST	Urea	Urea	m + 1	13C1	Urea (m + 1)	6564.07	13357.5	0.308553	0.234499	8	8
Proximal Straight Tubule	PST	Citrulline	Cit	m + 6	13C6	Cit (m + 6)	60.0697	51.4595	-0.0671904	0.798446	8	8
Proximal Straight Tubule	PST	Proline	Pro	m + 5	13C5	Pro (m + 5)	2.09451	8.26833	0.596335	0.0010878	8	8
Proximal Straight Tubule	PST	Glutamate	Glu	m + 5	13C5	Glu (m + 5)	3.56206	69.5843	1.29081	0.0829837	8	8
Proximal Straight Tubule	PST	Glutamine	Gln	m + 5	13C5	Gln (m + 5)	34.3134	28.0556	-0.0874438	0.382284	8	8
Proximal Straight Tubule	PST	Aspartate	Asp	m + 4	13C4	Asp (m + 4)	7.77523	12.2659	0.197987	0.328205	8	8
Proximal Straight Tubule	PST	Guanidinoacetate	Guan	m + 1	13C1	Guan (m + 1)	45.1419	781.444	1.23832	0.014763	8	8
Proximal Straight Tubule	PST	Agmatine	Agm	m + 5	13C5	Agm (m + 5)	6.93613	97.8418	1.14941	0.0003108	8	8
Proximal Straight Tubule	PST	Monomethylarginine	MMA	m + 6	13C6	MMA (m + 6)	6.95788	5.32579	-0.116093	0.441803	8	8
Proximal Straight Tubule	PST	Asymmetric dimethylarginine	ADMA	m + 6	13C6	ADMA (m + 6)	12.0925	17.9821	0.172325	0.160528	8	8
Proximal Straight Tubule	PST	Acetylarginine	AcArg	m + 6	13C6	AcArg (m + 6)	11.2411	9.96298	-0.0524204	0.328205	8	8
Thick Ascending Limb (loop of Henle)	TAL	Arginine	Arg	m + 6	13C6	Arg (m + 6)	103.85	128405	3.09218	0.0001554	8	8
Thick Ascending Limb (loop of Henle)	TAL	Ornithine	Orn	m + 5	13C5	Orn (m + 5)	22.0302	81.9663	0.570616	0.0003108	8	8
Thick Ascending Limb (loop of Henle)	TAL	Urea	Urea	m + 1	13C1	Urea (m + 1)	5595.97	10656.5	0.279741	0.234499	8	8
Thick Ascending Limb (loop of Henle)	TAL	Citrulline	Cit	m + 6	13C6	Cit (m + 6)	55.8204	74.4843	0.125272	0.505361	8	8
Thick Ascending Limb (loop of Henle)	TAL	Proline	Pro	m + 5	13C5	Pro (m + 5)	3.494	18.9587	0.734484	0.000621601	8	8
Thick Ascending Limb (loop of Henle)	TAL	Glutamate	Glu	m + 5	13C5	Glu (m + 5)	3.37213	8.01707	0.376111	0.0379176	8	8
Thick Ascending Limb (loop of Henle)	TAL	Glutamine	Gln	m + 5	13C5	Gln (m + 5)	25.4629	38.2722	0.176975	0.130381	8	8
Thick Ascending Limb (loop of Henle)	TAL	Aspartate	Asp	m + 4	13C4	Asp (m + 4)	9.52857	10.8651	0.0570076	0.798446	8	8
Thick Ascending Limb (loop of Henle)	TAL	Guanidinoacetate	Guan	m + 1	13C1	Guan (m + 1)	21.4709	22.8882	0.0277626	0.798446	8	8
Thick Ascending Limb (loop of Henle)	TAL	Agmatine	Agm	m + 5	13C5	Agm (m + 5)	11.1769	77.4091	0.840471	0.004662	8	8
Thick Ascending Limb (loop of Henle)	TAL	Monomethylarginine	MMA	m + 6	13C6	MMA (m + 6)	7.26283	6.58494	-0.0425541	0.95913	8	8
Thick Ascending Limb (loop of Henle)	TAL	Asymmetric dimethylarginine	ADMA	m + 6	13C6	ADMA (m + 6)	7.64579	12.383	0.209404	0.328205	8	8
Thick Ascending Limb (loop of Henle)	TAL	Acetylarginine	AcArg	m + 6	13C6	AcArg (m + 6)	11.3665	9.64722	-0.0712248	0.95913	8	8
Distal Convoluted Tubule	DCT	Arginine	Arg	m + 6	13C6	Arg (m + 6)	101.014	228188	3.35391	0.0001554	8	8
Distal Convoluted Tubule	DCT	Ornithine	Orn	m + 5	13C5	Orn (m + 5)	23.1203	42.1603	0.26091	0.234499	8	8
Distal Convoluted Tubule	DCT	Urea	Urea	m + 1	13C1	Urea (m + 1)	5233.99	7747.58	0.170333	0.278632	8	8
Distal Convoluted Tubule	DCT	Citrulline	Cit	m + 6	13C6	Cit (m + 6)	55.1529	78.3613	0.152533	0.441803	8	8
Distal Convoluted Tubule	DCT	Proline	Pro	m + 5	13C5	Pro (m + 5)	2.87203	5.08607	0.248192	0.0498834	8	8
Distal Convoluted Tubule	DCT	Glutamate	Glu	m + 5	13C5	Glu (m + 5)	3.04177	6.14742	0.305567	0.014763	8	8
Distal Convoluted Tubule	DCT	Glutamine	Gln	m + 5	13C5	Gln (m + 5)	24.929	27.1768	0.0374929	0.798446	8	8
Distal Convoluted Tubule	DCT	Aspartate	Asp	m + 4	13C4	Asp (m + 4)	5.95672	9.37981	0.197187	0.0649573	8	8
Distal Convoluted Tubule	DCT	Guanidinoacetate	Guan	m + 1	13C1	Guan (m + 1)	18.5774	108.657	0.767074	0.798446	8	8
Distal Convoluted Tubule	DCT	Agmatine	Agm	m + 5	13C5	Agm (m + 5)	7.7512	157.879	1.30895	0.0001554	8	8
Distal Convoluted Tubule	DCT	Monomethylarginine	MMA	m + 6	13C6	MMA (m + 6)	4.16054	6.02296	0.16066	0.234499	8	8
Distal Convoluted Tubule	DCT	Asymmetric dimethylarginine	ADMA	m + 6	13C6	ADMA (m + 6)	7.12754	14.4373	0.306546	0.0206682	8	8
Distal Convoluted Tubule	DCT	Acetylarginine	AcArg	m + 6	13C6	AcArg (m + 6)	8.80492	11.921	0.131587	0.878477	8	8
Collecting duct	CD	Arginine	Arg	m + 6	13C6	Arg (m + 6)	67.6923	292706	3.63589	0.0001554	8	8
Collecting duct	CD	Ornithine	Orn	m + 5	13C5	Orn (m + 5)	47.9348	61.7682	0.110114	0.505361	8	8
Collecting duct	CD	Urea	Urea	m + 1	13C1	Urea (m + 1)	3542.62	7732.23	0.33898	0.278632	8	8
Collecting duct	CD	Citrulline	Cit	m + 6	13C6	Cit (m + 6)	63.8301	83.3848	0.116062	0.505361	8	8
Collecting duct	CD	Proline	Pro	m + 5	13C5	Pro (m + 5)	2.21985	116.86	1.72134	0.0001554	8	8
Collecting duct	CD	Glutamate	Glu	m + 5	13C5	Glu (m + 5)	6.03562	31.1045	0.712101	0.000621601	8	8
Collecting duct	CD	Glutamine	Gln	m + 5	13C5	Gln (m + 5)	31.5124	29.7192	-0.0254446	0.878477	8	8
Collecting duct	CD	Aspartate	Asp	m + 4	13C4	Asp (m + 4)	5.75844	14.2326	0.392979	0.0281274	8	8
Collecting duct	CD	Guanidinoacetate	Guan	m + 1	13C1	Guan (m + 1)	21.7128	78.2584	0.556816	0.573737	8	8
Collecting duct	CD	Agmatine	Agm	m + 5	13C5	Agm (m + 5)	4.78695	111.628	1.36771	0.0001554	8	8
Collecting duct	CD	Monomethylarginine	MMA	m + 6	13C6	MMA (m + 6)	6.04944	7.74516	0.107315	0.573737	8	8
Collecting duct	CD	Asymmetric dimethylarginine	ADMA	m + 6	13C6	ADMA (m + 6)	10.3704	19.8952	0.282952	0.194872	8	8
Collecting duct	CD	Acetylarginine	AcArg	m + 6	13C6	AcArg (m + 6)	8.67657	12.3798	0.154366	0.328205	8	8
