# Supplementary material for: Diversion of Arginine’s dietary metabolic fate in proteinuric kidney disease
Source: Research Square preprint supplement (doi:10.21203/rs.3.rs-9927381/v1), 2026-06-17
Supplement: Supplementary file 8 [file 3c5c62133df8c7269166dbae.xlsx]

## Sheet: Sheet1
Mouse ID	Genotype	age	sex	pH	NH4
58	Control	3	f	5.19	46.681
59	Proteinuric	3	f	5.9	18.0759
61	Proteinuric	3	m	5.98	20.641
62	Control	3	m	5.26	38.4052
63	Control	3	m	5.47	83.8282
64	Control	3	m	5.55	54.6198
65	Control	3	f	5.56	18.8934
66	Control	3	f	5.45	41.888
67	Control	3	f	5.38	35.5214
68	Control	3	f	5.61	97.9919
69	Proteinuric	3	f	5.88	11.6145
70	Control	3	f	5.05	61.3465
71	Control	3	f	5.45	38.4052
72	Proteinuric	3	m	5.86	18.0759
73	Control	3	m	5.53	40.0756
74	Control	3	m	5.87	32.8541
75	Control	3	m	5.76	22.2377
76	Control	3	m	5.92	13.3887
77	Proteinuric	3	m	5.9	13.8625
57	Proteinuric	4	f	5.84	54.6198
57	Proteinuric	4	f	5.45	33.893
58	Control	4	f	5.19	35.2655
59	Proteinuric	4	f	5.75	74.9739
60	Control	4	f	5.74	26.7098
61	Proteinuric	4	m	5.52	18.6857
62	Control	4	m	5.78	35.2655
63	Control	4	m	5.89	12.5635
64	Control	4	m	5.74	35.2655
65	Control	4	f	5.31	41.3342
66	Control	4	f	5.32	44.7497
67	Control	4	f	5.16	46.5618
68	Control	4	f	5.52	141.498
69	Proteinuric	4	f	5.74	15.3218
70	Control	4	f	5.41	23.711
71	Control	4	f	5.79	15.3218
72	Proteinuric	4	m	5.67	36.6936
73	Control	4	m	6.62	30.0878
74	Control	4	m	5.71	36.6936
75	Control	4	m	5.56	36.6936
76	Control	4	m	5.64	48.4473
77	Proteinuric	4	m	5.46	31.3062
59	Proteinuric	5	f	5.47	25.995
60	Control	5	f	6.08	9.79806
61	Proteinuric	5	m	6.59	5.89916
64	Control	5	m	5.56	44.8942
65	Control	5	f	5.75	34.1617
66	Control	5	f	5.55	16.9215
67	Control	5	f	5.34	39.9337
68	Control	5	f	5.76	110.164
69	Proteinuric	5	f	5.61	25.995
71	Control	5	f	5.67	35.5214
72	Proteinuric	5	m	5.57	23.1228
73	Control	5	m	5.7	34.1617
74	Control	5	m	5.59	46.681
77	Proteinuric	5	m	5.7	25
57	Proteinuric	6	f	5.62	31.3062
59	Proteinuric	6	f	5.53	84.4559
60	Control	6	f	5.65	59.084
61	Proteinuric	6	m	6.24	14.1524
64	Control	6	m	5.65	41.3342
65	Control	6	f	5.58	66.5564
66	Control	6	f	5.48	44.7497
67	Control	6	f	5.26	91.4345
68	Control	6	f	5.27	237.066
69	Proteinuric	6	f	5.88	38.1795
71	Control	6	f	5.27	72.056
72	Proteinuric	6	m	5.53	21.0489
73	Control	6	m	5.88	38.1795
74	Control	6	m	5.71	36.6936
77	Proteinuric	6	m	5.6	31.3062
45	Proteinuric	8	f	5.67	24.636
48	Proteinuric	8	f	5.49	17.2938
54	Proteinuric	8	m	5.85	4.38915
55	Proteinuric	8	m	5.89	5.98205
64	Control	8	m	6.02	11.1119
65	Control	8	f	6.23	26.9147
66	Control	8	f	5.58	38.3416
73	Control	8	m	6.48	54.6198
107	Proteinuric	8	f	5.89	18.0759
110	Proteinuric	8	m	5.75	7.13987
1	Proteinuric	19	f	5.68	2.2534
9	Proteinuric	19	m	5.34	7.13987
22	Proteinuric	19	m	5.59	2.46973
23	Proteinuric	19	m	5.37	14.9255
164	Control	20	m	6.38	17.8801
165	Control	20	m	6.67	26.1529
336	Control	4	f	5.84	30.9685
343	Control	4	m	5.8	33.6992
176	Control	8	m	5.93	51.4186
177	Control	8	m	6.09	33.6992
180	Control	8	f	6.11	75.209
182	Control	8	f	5.97	28.459
