# Supplementary material for: Diversion of Arginine’s dietary metabolic fate in proteinuric kidney disease
Source: Research Square preprint supplement (doi:10.21203/rs.3.rs-9927381/v1), 2026-06-17
Supplement: Supplementary file 9 [file 3e808d5c924c23d274d38c3f.xlsx]

## Sheet: list1_proteins
GENE	UNIPROTIDs	log2FC	P.Value	adj.P.Val	Organ
Rhag	Q9QUT0	-0.757386	0.516879	0.969544	Lung
Rhag	A0A3B2WBH6;Q9QUT0	-0.742862	0.136093	0.668371	Spleen
Rhag	Q9QUT0	-1.63246	0.184316	0.399061	Erythrocytes
Rhcg	Q9QXP0	-0.515141	0.098407	0.29255	Kid. Cortex
Rhcg	Q9QXP0	-0.206871	0.194978	0.447402	Kid. Medulla
Rhcg	Q9QXP0				Urine
Gls	D3Z7P3	0.176442	0.279266	0.517234	Kid. Cortex
Gls	D3Z7P3	0.262414	0.137769	0.374034	Kid. Medulla
Gls	D3Z7P3	0.116002	0.404881	0.998911	Liver
Gls	D3Z7P3	-0.00473305	0.956232	0.990487	Heart
Gls	D3Z7P3	-0.255382	0.0178672	0.64336	Muscle
Gls	D3Z7P3	0.0229003	0.794224	0.984498	Lung
Gls	D3Z7P3	-0.133451	0.19281	0.586161	Brain
Gls	D3Z7P3	0.0441436	0.313921	0.78336	Spleen
Gls	D3Z7P3	-0.0807232	0.53871	0.944154	Duodenum
Gls	D3Z7P3	-0.0613393	0.544809	0.929793	Jejunum
Gls	D3Z7P3	-0.114155	0.183566	0.999761	Ileum
Gls	D3Z7P3	-0.162463	0.109355	0.817131	Colon
Gls	D3Z7P3	-4.11004	0.000127376	0.0975426	Erythrocytes
Gls	D3Z7P3	-0.338472	0.177537	0.471352	Plasma
Gls	D3Z7P3	1.43324	0.132239	0.39664	Urine
Glud1	P26443	-0.134818	0.0883552	0.274036	Kid. Cortex
Glud1	P26443	-0.088561	0.437509	0.670581	Kid. Medulla
Glud1	P26443	-0.130673	0.308222	0.996464	Liver
Glud1	P26443	0.0615364	0.504012	0.894886	Heart
Glud1	P26443	0.122824	0.371462	0.898591	Muscle
Glud1	P26443	0.02898	0.713933	0.983521	Lung
Glud1	P26443	0.0720709	0.549776	0.79429	Brain
Glud1	P26443	0.0384755	0.511274	0.867274	Spleen
Glud1	P26443	0.00570821	0.958387	0.997162	Duodenum
Glud1	P26443	-0.0309515	0.694559	0.958007	Jejunum
Glud1	P26443	-0.0876272	0.317914	0.999761	Ileum
Glud1	P26443	0.0223099	0.769526	0.96598	Colon
Glud1	P26443	1.06921	0.0646963	0.267146	Erythrocytes
Glud1	P26443	0.135032	0.575373	0.812442	Plasma
Glud1	P26443	-0.58054	0.304725	0.576476	Urine
Glul	P15105	-0.362144	0.043268	0.183563	Kid. Cortex
Glul	P15105	-0.382025	0.00635126	0.0884372	Kid. Medulla
Glul	P15105	-0.338598	0.012532	0.771601	Liver
Glul	P15105	0.260839	0.305315	0.818364	Heart
Glul	P15105	0.284329	0.209768	0.829171	Muscle
Glul	P15105	-0.380844	0.271516	0.94556	Lung
Glul	P15105	-0.0474902	0.671377	0.858912	Brain
Glul	P15105	-0.0608669	0.568244	0.888362	Spleen
Glul	P15105	-0.106493	0.295196	0.877762	Duodenum
Glul	P15105	-0.0421194	0.843159	0.978959	Jejunum
Glul	P15105	-0.491593	0.153046	0.999761	Ileum
Glul	P15105	0.213352	0.0516848	0.787546	Colon
Glul	P15105	0.82523	0.143619	0.355021	Erythrocytes
Glul	P15105	0.194794	0.841545	0.926671	Plasma
Glul	P15105	-0.763085	0.369798	0.625376	Urine
Ggt1	Q60928	-0.317826	0.126918	0.336212	Kid. Cortex
Ggt1	Q60928	-0.339104	0.00142496	0.0441265	Kid. Medulla
Ggt1	Q60928	0.543922	0.57829	0.998911	Liver
Ggt1	Q60928				Muscle
Ggt1	Q60928	0.00899839	0.964227	0.995984	Lung
Ggt1	Q60928	-0.0171292	0.913642	0.969464	Brain
Ggt1	Q60928	-0.610738	0.0698644	0.604294	Spleen
Ggt1	Q60928	0.666765	0.0152609	0.524519	Duodenum
Ggt1	Q60928	-0.317263	0.0388706	0.905799	Jejunum
Ggt1	Q60928	0.0650437	0.697497	0.999761	Ileum
Ggt1	Q60928	0.13856	0.822233	0.973195	Colon
Ggt1	Q60928	1.19964	0.0946892	0.305591	Erythrocytes
Ggt1	Q60928	-1.85868	0.00836278	0.144878	Urine
Gpt	Q8QZR5	-0.323913	0.456452	0.681994	Kid. Cortex
Gpt	Q8QZR5	-0.520741	0.0543317	0.240147	Kid. Medulla
Gpt	Q8QZR5	-0.233931	0.0277192	0.85006	Liver
Gpt	Q8QZR5	-0.27619	0.189675	0.766282	Heart
Gpt	Q8QZR5	0.0682487	0.694595	0.960302	Muscle
Gpt	Q8QZR5	0.0019112	0.988082	0.997617	Lung
Gpt	Q8QZR5	-0.195939	0.208639	0.596649	Brain
Gpt	Q8QZR5	-0.290899	0.475559	0.851113	Spleen
Gpt	Q8QZR5	0.0543306	0.851867	0.986474	Duodenum
Gpt	Q8QZR5	-0.123653	0.199001	0.905799	Jejunum
Gpt	Q8QZR5	-0.19833	0.0623405	0.999761	Ileum
Gpt	Q8QZR5	0.141724	0.497422	0.907865	Colon
Gpt	Q8QZR5				Urine
Gpt2	Q8BGT5	0.0345839	0.870018	0.938874	Kid. Cortex
Gpt2	Q8BGT5	0.0886871	0.678036	0.828846	Kid. Medulla
Gpt2	Q8BGT5	-0.203396	0.1776	0.968061	Liver
Gpt2	Q8BGT5	-0.222186	0.194017	0.766282	Heart
Gpt2	Q8BGT5	0.129988	0.247567	0.84805	Muscle
Gpt2	Q8BGT5	0.0686574	0.77514	0.984477	Lung
Gpt2	Q8BGT5	-0.0463772	0.673656	0.8597	Brain
Gpt2	Q8BGT5	0.0488066	0.906919	0.983245	Spleen
Gpt2	Q8BGT5	0.560976	0.0487011	0.630185	Duodenum
Gpt2	Q8BGT5	0.137783	0.503342	0.922159	Jejunum
Gpt2	Q8BGT5	-0.171677	0.441508	0.999761	Ileum
Gpt2	Q8BGT5	0.146613	0.28212	0.846649	Colon
Pck1	Q9Z2V4	-0.0209863	0.830743	0.919197	Kid. Cortex
Pck1	Q9Z2V4	0.0149826	0.930394	0.9644	Kid. Medulla
Pck1	Q9Z2V4	-0.171662	0.503392	0.998911	Liver
Pck1	Q9Z2V4	0.182242	0.233332	0.790491	Heart
Pck1	Q9Z2V4	0.609688	0.0581386	0.755044	Muscle
Pck1	Q9Z2V4	-0.734377	0.289873	0.94556	Lung
Pck1	Q9Z2V4	-0.0188788	0.876951	0.953827	Brain
Pck1	Q9Z2V4	0.0278307	0.920143	0.986162	Spleen
Pck1	Q9Z2V4	0.381112	0.36246	0.907026	Duodenum
Pck1	Q9Z2V4	-0.0654995	0.886432	0.98484	Jejunum
Pck1	Q9Z2V4	-0.119878	0.744663	0.999761	Ileum
Pck1	Q9Z2V4	0.0546843	0.654134	0.941663	Colon
Pck1	Q9Z2V4	1.33772	0.123758	0.342001	Erythrocytes
Pck1	Q9Z2V4	-0.315588	0.603015	0.792272	Urine
Slc38a3	Q9DCP2	0.491032	0.0494776	0.197393	Kid. Cortex
Slc38a3	Q9DCP2	0.28024	0.0951078	0.309183	Kid. Medulla
Slc38a3	Q9DCP2	0.0296214	0.835099	0.998911	Liver
Slc38a3	A0A0A6YWF5;A0A0A6YWH4;A0A0A6YX60;Q9DCP2	-0.153016	0.355091	0.842029	Heart
Slc38a3	Q9DCP2	0.0355065	0.808009	0.924362	Brain
Slc38a3	Q9DCP2	1.25396	0.00961313	0.512979	Duodenum
Slc38a3	A0A0A6YWF5;A0A0A6YWH4;A0A0A6YX60;Q9DCP2				Colon
Slc6a19	Q9D687	-0.618897	0.00282526	0.0410481	Kid. Cortex
Slc6a19	Q9D687	-0.65477	0.0121474	0.117915	Kid. Medulla
Slc6a19	Q9D687	-0.037497	0.928461	0.994395	Duodenum
Slc6a19	Q9D687	-0.186074	0.136584	0.905799	Jejunum
Slc6a19	Q9D687	0.103175	0.358207	0.999761	Ileum
Slc6a19	D6RJ80;Q9D687	-0.623464	0.408042	0.653022	Urine
Cltrn	Q9ESG4	-0.691808	0.00243461	0.0382278	Kid. Cortex
Cltrn	Q9ESG4	-0.574851	0.0168165	0.134073	Kid. Medulla
Cltrn	Q9ESG4	-0.318658	0.292897	0.869467	Muscle
Cltrn	Q9ESG4	-1.93859	0.00664264	0.140638	Urine
Ace2	Q8R0I0	0.15753	0.296199	0.532431	Kid. Cortex
Ace2	Q8R0I0	0.0378258	0.824244	0.909641	Kid. Medulla
Ace2	Q8R0I0	-0.192569	0.466454	0.968009	Lung
Ace2	Q8R0I0	-0.135829	0.276427	0.633805	Brain
Ace2	Q8R0I0	0.158214	0.628154	0.961029	Duodenum
Ace2	Q8R0I0	-0.268193	0.154466	0.905799	Jejunum
Ace2	Q8R0I0	-0.0111542	0.931726	0.999761	Ileum
Ace2	Q8R0I0	-0.249696	0.784214	0.899133	Urine
Slc7a5	Q9Z127	0.587634	0.0202832	0.122374	Kid. Cortex
Slc7a5	Q9Z127	0.45889	0.0378337	0.200523	Kid. Medulla
Slc7a5	Q9Z127	-0.0504646	0.690714	0.998911	Liver
Slc7a5	Q9Z127	-0.00549422	0.973825	0.992515	Heart
Slc7a5	Q9Z127	0.507392	0.341966	0.891642	Muscle
Slc7a5	Q9Z127	-0.193468	0.226296	0.94556	Lung
Slc7a5	Q9Z127	0.191276	0.126976	0.533428	Brain
Slc7a5	Q9Z127	-0.112275	0.149177	0.677204	Spleen
Slc7a5	Q9Z127	0.658732	0.081752	0.69513	Duodenum
Slc7a5	Q9Z127	0.127007	0.291166	0.905799	Jejunum
Slc7a5	Q9Z127	0.045322	0.696558	0.999761	Ileum
Slc7a5	Q9Z127	0.0492126	0.820401	0.973195	Colon
Slc7a5	Q9Z127	0.0250223	0.973056	0.987753	Erythrocytes
Slc7a6	Q8BGK6	-1.5959	0.0312747	0.154081	Kid. Cortex
Slc7a6	Q8BGK6	-1.6388	0.00162303	0.0470736	Kid. Medulla
Slc7a6	Q8BGK6	0.028284	0.919572	0.994925	Lung
Slc7a6	Q8BGK6	0.382373	0.166204	0.56411	Brain
Slc7a6	Q8BGK6	0.634555	0.00818534	0.458706	Spleen
Slc7a6	Q8BGK6	-0.445454	0.363165	0.999761	Ileum
Slc7a6	Q8BGK6	-0.392703	0.383192	0.878244	Colon
Slc25a11	Q9CR62	-0.240519	0.010467	0.0842575	Kid. Cortex
Slc25a11	Q9CR62	-0.300432	0.0211486	0.149274	Kid. Medulla
Slc25a11	Q9CR62	0.0724285	0.443209	0.998911	Liver
Slc25a11	Q9CR62	-0.212246	0.17501	0.757139	Heart
Slc25a11	Q9CR62	0.0228002	0.879036	0.983691	Muscle
Slc25a11	Q9CR62	-0.110717	0.486356	0.968009	Lung
Slc25a11	Q9CR62	-0.182563	0.0495759	0.516647	Brain
Slc25a11	Q9CR62	-0.030392	0.709484	0.929742	Spleen
Slc25a11	Q9CR62	-0.0250932	0.720769	0.976601	Duodenum
Slc25a11	Q9CR62	-0.117443	0.360586	0.913241	Jejunum
Slc25a11	Q9CR62	-0.132667	0.178612	0.999761	Ileum
Slc25a11	Q9CR62	0.180985	0.151123	0.822251	Colon
Slc25a11	Q9CR62	-0.635988	0.27631	0.555909	Urine
Slc25a12	Q8BH59	-0.326006	0.00466401	0.0545432	Kid. Cortex
Slc25a12	Q8BH59	-0.301332	0.0235162	0.157124	Kid. Medulla
Slc25a12	Q8BH59	0.116197	0.282547	0.993956	Liver
Slc25a12	Q8BH59	-0.0988485	0.483776	0.893708	Heart
Slc25a12	Q8BH59	-0.0905966	0.386268	0.902716	Muscle
Slc25a12	Q8BH59	-0.0680007	0.683401	0.983521	Lung
Slc25a12	Q8BH59	-0.118186	0.203555	0.593509	Brain
Slc25a12	Q8BH59	0.00641159	0.911603	0.983594	Spleen
Slc25a12	Q8BH59	0.0404213	0.784201	0.982876	Duodenum
Slc25a12	Q8BH59	-0.003641	0.970438	0.995755	Jejunum
Slc25a12	Q8BH59	0.0267955	0.749588	0.999761	Ileum
Slc25a12	Q8BH59	1.19128e-05	0.999888	0.999888	Colon
Slc25a12	Q8BH59	-0.899663	0.302744	0.576476	Urine
Got1	P05201	-0.281721	0.00292681	0.0419401	Kid. Cortex
Got1	P05201	-0.0403062	0.629767	0.800088	Kid. Medulla
Got1	P05201	-0.251492	0.0548631	0.904569	Liver
Got1	P05201	-0.0260156	0.807929	0.963001	Heart
Got1	P05201	-0.0323396	0.806367	0.977339	Muscle
Got1	P05201	-0.134403	0.695272	0.983521	Lung
Got1	P05201	0.0564769	0.549471	0.79429	Brain
Got1	P05201	0.00610575	0.899422	0.982036	Spleen
Got1	P05201	0.154072	0.182696	0.801676	Duodenum
Got1	P05201	0.0658276	0.486866	0.921844	Jejunum
Got1	P05201	0.0703083	0.419602	0.999761	Ileum
Got1	P05201	0.0771405	0.559114	0.922551	Colon
Got1	P05201	0.354597	0.154202	0.364477	Erythrocytes
Got1	P05201	-0.37425	0.109237	0.382391	Plasma
Got1	P05201	0.551694	0.386037	0.635456	Urine
Got2	P05202	-0.364654	0.00210387	0.0355168	Kid. Cortex
Got2	P05202	-0.268106	0.0125564	0.120058	Kid. Medulla
Got2	P05202	-0.0168059	0.872292	0.998911	Liver
Got2	P05202	-0.0885287	0.553356	0.904657	Heart
Got2	P05202	-0.124994	0.464588	0.925012	Muscle
Got2	P05202	-0.029503	0.868512	0.989651	Lung
Got2	P05202	-0.0464543	0.556206	0.797404	Brain
Got2	P05202	-0.0125938	0.787488	0.955305	Spleen
Got2	P05202	-0.123835	0.0878424	0.700509	Duodenum
Got2	P05202	-0.0843374	0.288252	0.905799	Jejunum
Got2	P05202	0.004333	0.957329	0.999761	Ileum
Got2	P05202	-0.018318	0.774345	0.96598	Colon
Got2	P05202	1.8898	0.138548	0.352393	Erythrocytes
Got2	P05202	-0.0705729	0.738787	0.892099	Plasma
Got2	P05202	-1.13583	0.0792251	0.317911	Urine
Mdh1	P14152	-0.280639	0.0050097	0.0569099	Kid. Cortex
Mdh1	P14152	-0.0915157	0.230066	0.485205	Kid. Medulla
Mdh1	P14152	-0.134957	0.12701	0.939096	Liver
Mdh1	P14152	-0.0390167	0.661138	0.93192	Heart
Mdh1	P14152	-0.0218426	0.887256	0.984995	Muscle
Mdh1	P14152	0.032079	0.83822	0.987129	Lung
Mdh1	P14152	0.0763279	0.304444	0.650813	Brain
Mdh1	P14152	0.0151458	0.807011	0.961408	Spleen
Mdh1	P14152	-0.00411931	0.96559	0.997608	Duodenum
Mdh1	P14152	-0.0745332	0.335193	0.913241	Jejunum
Mdh1	P14152	0.0448523	0.577618	0.999761	Ileum
Mdh1	P14152	-0.00351347	0.970243	0.996132	Colon
Mdh1	P14152	0.582722	0.0438816	0.238469	Erythrocytes
Mdh1	P14152	-0.259329	0.29079	0.600786	Plasma
Mdh1	P14152	-0.153542	0.804474	0.908163	Urine
Nags	Q8R4H7	-0.0902905	0.439903	0.998911	Liver
Nags	Q8R4H7	-0.071352	0.385725	0.910168	Duodenum
Nags	Q8R4H7	-0.0363656	0.563088	0.934772	Jejunum
Nags	Q8R4H7	-0.0804438	0.471918	0.999761	Ileum
Cps1	Q8C196	-0.0893688	0.521948	0.998911	Liver
Cps1	Q8C196	1.40797	0.0911914	0.701311	Heart
Cps1	Q8C196	-0.045537	0.947331	0.990904	Muscle
Cps1	Q8C196	0.630628	0.110631	0.94556	Lung
Cps1	Q8C196	-0.433711	0.505167	0.865362	Spleen
Cps1	Q8C196	-0.0222996	0.807892	0.983481	Duodenum
Cps1	Q8C196	0.0183888	0.79928	0.975535	Jejunum
Cps1	Q8C196	0.0256888	0.699277	0.999761	Ileum
Cps1	Q8C196	0.844734	0.0852235	0.804289	Colon
Cps1	Q8C196	-0.0891851	0.611539	0.826661	Plasma
Cps1	Q8C196	-1.34869	0.0474968	0.260144	Urine
Otc	P11725	-0.0158761	0.901438	0.998911	Liver
Otc	P11725;Q8R1A8	0.832978	0.0125842	0.565876	Heart
Otc	P11725;Q8R1A8	0.97841	0.011932	0.809059	Lung
Otc	P11725;Q8R1A8	-0.451321	0.208259	0.719859	Spleen
Otc	P11725;Q8R1A8	-0.0256834	0.87479	0.989572	Duodenum
Otc	P11725;Q8R1A8	-0.0137604	0.875437	0.983808	Jejunum
Otc	P11725;Q8R1A8	-0.0743456	0.286388	0.999761	Ileum
Otc	P11725;Q8R1A8	-0.0108812	0.947962	0.992851	Colon
Otc	P11725;Q8R1A8				Urine
Ass1	P16460	-0.454049	0.00394925	0.0495675	Kid. Cortex
Ass1	P16460	-0.455854	0.0270665	0.167531	Kid. Medulla
Ass1	P16460	-0.268927	0.0139165	0.800558	Liver
Ass1	P16460	0.718352	0.209101	0.767394	Heart
Ass1	P16460	-0.0564385	0.866011	0.982346	Muscle
Ass1	P16460	0.306586	0.176417	0.94556	Lung
Ass1	P16460	-0.456433	0.0765187	0.525359	Brain
Ass1	P16460	-0.161756	0.234336	0.739744	Spleen
Ass1	P16460	0.0855283	0.741071	0.980129	Duodenum
Ass1	P16460	-0.13549	0.512516	0.924727	Jejunum
Ass1	P16460	-0.0408344	0.73264	0.999761	Ileum
Ass1	P16460	0.0181973	0.854605	0.977565	Colon
Ass1	P16460	1.27517	0.065646	0.268226	Erythrocytes
Ass1	P16460	-0.91676	0.0564489	0.279742	Plasma
Ass1	P16460	-0.250944	0.670892	0.832232	Urine
Asl	Q91YI0	-0.444323	0.00432418	0.0522367	Kid. Cortex
Asl	Q91YI0	-0.267565	0.0806791	0.285553	Kid. Medulla
Asl	Q91YI0	-0.119951	0.179382	0.968061	Liver
Asl	Q91YI0	0.439682	0.157411	0.756081	Heart
Asl	Q91YI0	0.0680899	0.743364	0.967617	Muscle
Asl	Q91YI0	0.128099	0.394112	0.957601	Lung
Asl	Q91YI0	-0.0568459	0.599378	0.823258	Brain
Asl	Q91YI0	-0.182225	0.0195056	0.499013	Spleen
Asl	Q91YI0	0.20858	0.0822128	0.69513	Duodenum
Asl	Q91YI0	-0.0532999	0.387128	0.913498	Jejunum
Asl	Q91YI0	0.0328963	0.656156	0.999761	Ileum
Asl	Q91YI0	0.0661501	0.599616	0.930007	Colon
Asl	E0CY49;Q91YI0	0.669267	0.275904	0.499755	Erythrocytes
Asl	Q91YI0	-0.0161695	0.952293	0.976007	Plasma
Asl	Q91YI0	-0.0129734	0.982009	0.994961	Urine
Arg1	Q61176	0.565814	0.0659392	0.23227	Kid. Cortex
Arg1	Q61176	0.644332	0.314097	0.574343	Kid. Medulla
Arg1	Q61176	-0.0985626	0.297904	0.996464	Liver
Arg1	Q61176	0.99834	0.160623	0.757139	Heart
Arg1	Q61176	-0.0412341	0.932299	0.989888	Muscle
Arg1	Q61176	0.833286	0.104579	0.94556	Lung
Arg1	Q61176	0.611172	0.1299	0.534698	Brain
Arg1	Q61176	0.328576	0.640169	0.912137	Spleen
Arg1	Q61176	0.274882	0.211339	0.82482	Duodenum
Arg1	Q61176	0.201648	0.15342	0.905799	Jejunum
Arg1	Q61176	0.120956	0.670195	0.999761	Ileum
Arg1	Q61176	0.260691	0.601726	0.930007	Colon
Arg1	Q61176	-0.197128	0.420062	0.720622	Plasma
Arg1	Q61176	3.39254	0.115092	0.373863	Urine
Arg2	O08691	0.321772	0.64537	0.814705	Kid. Cortex
Arg2	O08691	0.422319	0.490848	0.708106	Kid. Medulla
Arg2	O08691	0.230306	0.092293	0.94556	Lung
Arg2	O08691	0.944259	0.153628	0.551608	Brain
Arg2	O08691	-0.185885	0.705946	0.928785	Spleen
Arg2	O08691	-0.164609	0.564437	0.951277	Duodenum
Arg2	O08691	-0.00112984	0.992079	0.998744	Jejunum
Arg2	O08691	-0.23958	0.255179	0.999761	Ileum
Arg2	O08691	-0.0831409	0.843783	0.977532	Colon
Slc25a15	Q9WVD5	-0.289127	0.0153745	0.104892	Kid. Cortex
Slc25a15	Q9WVD5	-0.287705	0.091049	0.301633	Kid. Medulla
Slc25a15	Q9WVD5	-0.214949	0.137221	0.949856	Liver
Slc25a15	Q9WVD5	-0.232516	0.125451	0.7319	Heart
Slc25a15	Q9WVD5	0.170317	0.455021	0.923399	Muscle
Slc25a15	Q9WVD5	0.0734474	0.713783	0.983521	Lung
Slc25a15	Q9WVD5	-0.087241	0.493131	0.762543	Brain
Slc25a15	Q9WVD5	-0.0103313	0.934116	0.986666	Spleen
Slc25a15	Q9WVD5	-0.182455	0.35829	0.906384	Duodenum
Slc25a15	Q9WVD5	-0.0863764	0.456963	0.920414	Jejunum
Slc25a15	Q9WVD5	-0.22289	0.0747415	0.999761	Ileum
Slc25a15	Q9WVD5	0.117907	0.41674	0.88624	Colon
Slc7a7	A0A0G2JE10;A0A0G2JEB8;A0A2I3BPU1;A0A2I3BQK2;A0A2I3BQX2;Q9Z1K8	-0.354126	0.0872142	0.272537	Kid. Cortex
Slc7a7	A0A0G2JE10;A0A0G2JEB8;A0A2I3BPU1;A0A2I3BQK2;A0A2I3BQX2;Q9Z1K8	-0.203957	0.483923	0.702679	Kid. Medulla
Slc7a7	A0A0G2JE10;A0A0G2JEB8;A0A2I3BPU1;A0A2I3BQK2;A0A2I3BQX2;Q9Z1K8	0.210554	0.234228	0.983026	Liver
Slc7a7	A0A0G2JE10;A0A0G2JEB8;A0A2I3BPU1;A0A2I3BQK2;A0A2I3BQX2;Q9Z1K8	-0.538277	0.388093	0.858453	Heart
Slc7a7	A0A0G2JE10;A0A0G2JEB8;A0A2I3BPU1;A0A2I3BQK2;A0A2I3BQX2;Q9Z1K8	0.561003	0.0831324	0.94556	Lung
Slc7a7	A0A0G2JE10;A0A0G2JEB8;A0A2I3BPU1;A0A2I3BQK2;A0A2I3BQX2;Q9Z1K8	0.0485218	0.662119	0.919862	Spleen
Slc7a7	A0A0G2JE10;A0A0G2JEB8;A0A2I3BPU1;A0A2I3BQK2;A0A2I3BQX2;Q9Z1K8	-0.248317	0.191084	0.809571	Duodenum
Slc7a7	A0A0G2JE10;A0A0G2JEB8;A0A2I3BPU1;A0A2I3BQK2;A0A2I3BQX2;Q9Z1K8	0.220672	0.360295	0.913241	Jejunum
Slc7a7	A0A0G2JE10;A0A0G2JEB8;A0A2I3BPU1;A0A2I3BQK2;A0A2I3BQX2;Q9Z1K8	0.143508	0.418291	0.999761	Ileum
Slc7a7	A0A0G2JE10;A0A0G2JEB8;A0A2I3BPU1;A0A2I3BQK2;A0A2I3BQX2;Q9Z1K8	0.00942211	0.936264	0.992443	Colon
Oat	P29758	-0.492413	0.13893	0.355761	Kid. Cortex
Oat	P29758	-0.207841	0.43718	0.670581	Kid. Medulla
Oat	P29758	-0.734849	0.00403638	0.680623	Liver
Oat	P29758	0.0907253	0.250619	0.797477	Heart
Oat	P29758	-0.0189194	0.843655	0.979451	Muscle
Oat	P29758	0.265401	0.0302368	0.891805	Lung
Oat	P29758	0.126235	0.332205	0.668056	Brain
Oat	P29758	0.0228015	0.637486	0.912137	Spleen
Oat	P29758	-0.101645	0.51818	0.937792	Duodenum
Oat	P29758	-0.0781004	0.523254	0.928511	Jejunum
Oat	P29758	-0.0789314	0.408209	0.999761	Ileum
Oat	P29758	-0.199222	0.156417	0.825245	Colon
Oat	P29758	-0.987232	0.263918	0.543733	Urine
Aldh18a1	Q9Z110	0.310878	0.0745963	0.249816	Kid. Cortex
Aldh18a1	Q9Z110	0.326573	0.047881	0.224614	Kid. Medulla
Aldh18a1	Q9Z110	0.817618	0.000496875	0.340344	Liver
Aldh18a1	Q9Z110	0.0641142	0.727694	0.946999	Heart
Aldh18a1	Q9Z110	0.713285	0.128666	0.796022	Muscle
Aldh18a1	Q9Z110	-0.104083	0.306299	0.94556	Lung
Aldh18a1	Q9Z110	-0.020931	0.794579	0.919775	Brain
Aldh18a1	Q9Z110	0.00441628	0.94495	0.988089	Spleen
Aldh18a1	Q9Z110	0.0858378	0.384668	0.910063	Duodenum
Aldh18a1	Q9Z110	-0.0254122	0.790384	0.973851	Jejunum
Aldh18a1	Q9Z110	-0.0822466	0.433121	0.999761	Ileum
Aldh18a1	Q9Z110	0.0481134	0.820812	0.973195	Colon
Aldh4a1	Q8CHT0	-0.406018	0.00129468	0.0276673	Kid. Cortex
Aldh4a1	Q8CHT0	-0.248227	0.043677	0.214591	Kid. Medulla
Aldh4a1	Q8CHT0	-0.141655	0.250782	0.988341	Liver
Aldh4a1	Q8CHT0	-0.0467561	0.726792	0.946999	Heart
Aldh4a1	Q8CHT0	0.164182	0.18849	0.82481	Muscle
Aldh4a1	Q8CHT0	-0.171824	0.152779	0.94556	Lung
Aldh4a1	Q8CHT0	0.131916	0.114388	0.530225	Brain
Aldh4a1	Q8CHT0	-0.0752652	0.368563	0.812204	Spleen
Aldh4a1	Q8CHT0	-0.0312698	0.780892	0.982876	Duodenum
Aldh4a1	Q8CHT0	0.190108	0.0836391	0.905799	Jejunum
Aldh4a1	Q8CHT0	-0.0206573	0.884774	0.999761	Ileum
Aldh4a1	Q8CHT0	0.0398731	0.663996	0.942851	Colon
Aldh4a1	Q8CHT0	0.780668	0.184526	0.399061	Erythrocytes
Aldh4a1	Q8CHT0	0.0192626	0.895631	0.948988	Plasma
Aldh4a1	Q8CHT0	-1.06752	0.156174	0.430326	Urine
Pycr1	A2ABZ3	-0.158963	0.147288	0.366242	Kid. Cortex
Pycr1	A2ABZ3	0.0395413	0.888573	0.984995	Muscle
Pycr1	Q922W5	1.17853	0.323032	0.94556	Lung
Pycr1	Q922W5	-0.0590436	0.576952	0.809919	Brain
Pycr1	A2ABZ2;Q922W5	0.0664997	0.903398	0.982735	Spleen
Pycr1	Q922W5	0.495056	0.263255	0.861518	Duodenum
Pycr1	Q922W5	0.0406937	0.726922	0.964368	Jejunum
Pycr1	Q922W5	0.104073	0.251258	0.999761	Ileum
Pycr1	Q922W5	0.175526	0.690592	0.946653	Colon
Pycr2	Q922Q4	0.0183357	0.890649	0.94863	Kid. Cortex
Pycr2	Q922Q4	-0.0147565	0.919613	0.958905	Kid. Medulla
Pycr2	Q922Q4	-0.320101	0.331845	0.998911	Liver
Pycr2	Q922Q4	0.44745	0.180849	0.762555	Heart
Pycr2	Q922Q4	0.743738	0.0477248	0.744478	Muscle
Pycr2	Q922Q4	0.141579	0.287228	0.94556	Lung
Pycr2	Q922Q4	-0.123105	0.15254	0.551163	Brain
Pycr2	Q922Q4	-0.128242	0.0234994	0.507465	Spleen
Pycr2	Q922Q4	0.384322	0.163008	0.777466	Duodenum
Pycr2	Q922Q4	0.127889	0.147972	0.905799	Jejunum
Pycr2	Q922Q4	0.238437	0.0207714	0.999761	Ileum
Pycr2	Q922Q4	-0.0347049	0.809427	0.973195	Colon
Pycr3	Q9DCC4	0.0577064	0.670124	0.828506	Kid. Cortex
Pycr3	Q9DCC4	-0.100546	0.39332	0.638405	Kid. Medulla
Pycr3	Q9DCC4	-0.299751	0.0323379	0.85006	Liver
Pycr3	Q9DCC4	0.135944	0.215415	0.775531	Heart
Pycr3	Q9DCC4	0.0770969	0.871504	0.982346	Muscle
Pycr3	Q9DCC4	-0.18433	0.303521	0.94556	Lung
Pycr3	Q9DCC4	-0.00586439	0.966016	0.989311	Brain
Pycr3	Q9DCC4	0.0607503	0.441938	0.840034	Spleen
Pycr3	Q9DCC4	-0.0475123	0.5729	0.952874	Duodenum
Pycr3	Q9DCC4	-0.0418562	0.77568	0.972502	Jejunum
Pycr3	Q9DCC4	-0.0959813	0.244464	0.999761	Ileum
Pycr3	Q9DCC4	0.0342045	0.824118	0.973195	Colon
Pycr3	Q9DCC4	0.503036	0.0883463	0.298798	Erythrocytes
Pycr3	Q9DCC4				Urine
Prodh	Q9WU79	-0.418598	0.00158687	0.0309	Kid. Cortex
Prodh	Q9WU79	-0.348189	0.00554665	0.0827557	Kid. Medulla
Prodh	Q9WU79	-0.191926	0.0525896	0.89045	Liver
Prodh	Q9WU79	-0.114312	0.331604	0.834197	Heart
Prodh	Q9WU79	0.0728829	0.626795	0.947617	Muscle
Prodh	Q9WU79	-0.0555736	0.641325	0.981362	Lung
Prodh	Q9WU79	0.00693732	0.944932	0.981087	Brain
Prodh	Q9WU79	-0.834551	0.0869216	0.623405	Spleen
Prodh	Q9WU79	0.0413991	0.694974	0.973466	Duodenum
Prodh	Q9WU79	0.15564	0.166241	0.905799	Jejunum
Prodh	Q9WU79	0.0310354	0.732558	0.999761	Ileum
Prodh	Q9WU79	0.0500863	0.702722	0.948926	Colon

## Sheet: raw_duplicates
ID	log2FC	AveExpr	t	P.Value	adj.P.Val	B	ORG	DESCRIPTIONS	GENES	UNIPROTIDs	GENE	Organ	is_canonical
ID_2121	0.176442	16.282	1.15132	0.279266	0.517234	-5.96036	Mouse	Glutaminase kidney isoform, mitochondrial	Gls	D3Z7P3	Gls	Kid. Cortex	TRUE
ID_2660	-0.575682	11.0097	-1.50506	0.166567	0.39027	-5.53366	Mouse	glutaminase (Fragment)	Gls	F6RDM4	Gls	Kid. Cortex	FALSE
ID_2685	0.162827	12.2959	0.711569	0.49476	0.712707	-6.36599	Mouse	glutaminase (Fragment)	Gls	F6U529	Gls	Kid. Cortex	FALSE
ID_2193	0.262414	15.1646	1.61323	0.137769	0.374034	-5.32616	Mouse	Glutaminase kidney isoform, mitochondrial	Gls	D3Z7P3	Gls	Kid. Medulla	TRUE
ID_2742	0.053575	9.99686	0.127476	0.901091	0.950322	-6.56216	Mouse	glutaminase (Fragment)	Gls	F6RDM4	Gls	Kid. Medulla	FALSE
ID_2769	0.233649	10.9556	1.58275	0.14456	0.383572	-5.36781	Mouse	glutaminase (Fragment)	Gls	F6U529	Gls	Kid. Medulla	FALSE
ID_1891	0.116002	10.2527	0.867986	0.404881	0.998911	-5.30348	Mouse	Glutaminase kidney isoform, mitochondrial	Gls	D3Z7P3	Gls	Liver	TRUE
ID_2412	0.0152298	8.23013	0.0661538	0.948503	0.998917	-5.65032	Mouse	glutaminase (Fragment)	Gls	F6RDM4	Gls	Liver	FALSE
ID_1601	-0.00473305	11.091	-0.0562741	0.956232	0.990487	-6.2279	Mouse	Glutaminase kidney isoform, mitochondrial	Gls	D3Z7P3	Gls	Heart	TRUE
ID_1988	0.318519	9.34975	2.41824	0.0361695	0.604446	-3.81812	Mouse	glutaminase (Fragment)	Gls	F6RDM4	Gls	Heart	FALSE
ID_1230	-0.255382	10.2313	-2.82948	0.0178672	0.64336	-3.05612	Mouse	Glutaminase kidney isoform, mitochondrial	Gls	D3Z7P3	Gls	Muscle	TRUE
ID_1511	-1.14468	7.38818	-2.1002	0.0689145	0.759262	-4.0661	Mouse	glutaminase (Fragment)	Gls	F6RDM4	Gls	Muscle	FALSE
ID_2387	0.0229003	12.3591	0.267544	0.794224	0.984498	-5.45695	Mouse	Glutaminase kidney isoform, mitochondrial	Gls	D3Z7P3	Gls	Lung	TRUE
ID_3028	0.364721	9.71577	1.60163	0.138819	0.94556	-4.46276	Mouse	glutaminase (Fragment)	Gls	F6RDM4	Gls	Lung	FALSE
ID_3054	0.275398	10.9717	2.79118	0.0182476	0.857953	-2.9697	Mouse	glutaminase (Fragment)	Gls	F6U529	Gls	Lung	FALSE
ID_2293	-0.133451	15.0939	-1.39614	0.19281	0.586161	-4.48533	Mouse	Glutaminase kidney isoform, mitochondrial	Gls	D3Z7P3	Gls	Brain	TRUE
ID_2885	0.20475	9.70813	2.24105	0.0488464	0.516647	-3.82726	Mouse	glutaminase (Fragment)	Gls	F6RDM4	Gls	Brain	FALSE
ID_2030	0.0441436	12.6823	1.06035	0.313921	0.78336	-5.20716	Mouse	Glutaminase kidney isoform, mitochondrial	Gls	D3Z7P3	Gls	Spleen	TRUE
ID_2529	0.00991791	9.03371	0.0431245	0.966451	0.992081	-5.72869	Mouse	glutaminase (Fragment)	Gls	F6RDM4	Gls	Spleen	FALSE
ID_2552	0.281627	10.7712	2.55701	0.0285177	0.535334	-3.32243	Mouse	glutaminase (Fragment)	Gls	F6U529	Gls	Spleen	FALSE
ID_10611	0.0413991	12.5732	0.403638	0.694974	0.973466	-5.77859	Mouse	Proline dehydrogenase 1, mitochondrial	Prodh	Q9WU79	Prodh	Duodenum	TRUE
ID_10723	0.0858378	14.9031	0.909129	0.384668	0.910063	-5.45965	Mouse	Delta-1-pyrroline-5-carboxylate synthase	Aldh18a1	Q9Z110	Aldh18a1	Duodenum	TRUE
ID_2359	-0.0807232	14.1329	-0.636557	0.53871	0.944154	-5.65959	Mouse	Glutaminase kidney isoform, mitochondrial	Gls	D3Z7P3	Gls	Duodenum	TRUE
ID_2934	0.635408	10.7465	1.78751	0.107492	0.724677	-4.45538	Mouse	Proline dehydrogenase (Fragment)	Prodh	F6PYI8	Prodh	Duodenum	FALSE
ID_2943	-0.455837	10.5519	-1.78946	0.103816	0.72245	-4.47093	Mouse	glutaminase (Fragment)	Gls	F6RDM4	Gls	Duodenum	FALSE
ID_2969	-0.178118	11.6303	-1.16621	0.270587	0.869975	-5.21823	Mouse	glutaminase (Fragment)	Gls	F6U529	Gls	Duodenum	FALSE
ID_3369	0.288949	10.3794	0.879372	0.402067	0.915341	-5.44947	Mouse	Aldehyde dehydrogenase 18 family, member A1 (Fragment)	Aldh18a1	H3BKK0	Aldh18a1	Duodenum	FALSE
ID_10215	-0.0254122	15.7885	-0.273031	0.790384	0.973851	-4.9733	Mouse	Delta-1-pyrroline-5-carboxylate synthase	Aldh18a1	Q9Z110	Aldh18a1	Jejunum	TRUE
ID_2206	-0.0613393	14.3529	-0.626839	0.544809	0.929793	-4.87994	Mouse	Glutaminase kidney isoform, mitochondrial	Gls	D3Z7P3	Gls	Jejunum	TRUE
ID_2780	0.17652	9.23085	0.697477	0.501397	0.922159	-4.8533	Mouse	glutaminase (Fragment)	Gls	F6RDM4	Gls	Jejunum	FALSE
ID_2801	-0.0156364	11.9565	-0.0889006	0.930916	0.991682	-4.99339	Mouse	glutaminase (Fragment)	Gls	F6U529	Gls	Jejunum	FALSE
ID_3184	0.153766	10.7336	0.287535	0.782028	0.973719	-4.84977	Mouse	Aldehyde dehydrogenase 18 family, member A1 (Fragment)	Aldh18a1	H3BKK0	Aldh18a1	Jejunum	FALSE
ID_10504	0.0310354	13.005	0.351429	0.732558	0.999761	-5.30823	Mouse	Proline dehydrogenase 1, mitochondrial	Prodh	Q9WU79	Prodh	Ileum	TRUE
ID_2289	-0.114155	14.1744	-1.42872	0.183566	0.999761	-4.57688	Mouse	Glutaminase kidney isoform, mitochondrial	Gls	D3Z7P3	Gls	Ileum	TRUE
ID_2872	-0.0768754	9.70614	-0.108419	0.916705	0.999761	-5.16566	Mouse	Proline dehydrogenase (Fragment)	Prodh	F6PYI8	Prodh	Ileum	FALSE
ID_2883	-0.157664	9.94789	-0.865236	0.407186	0.999761	-5.05229	Mouse	glutaminase (Fragment)	Gls	F6RDM4	Gls	Ileum	FALSE
ID_2905	0.0240092	11.887	0.208873	0.83874	0.999761	-5.34232	Mouse	glutaminase (Fragment)	Gls	F6U529	Gls	Ileum	FALSE
ID_2048	-0.162463	12.4667	-1.75447	0.109355	0.817131	-4.47699	Mouse	Glutaminase kidney isoform, mitochondrial	Gls	D3Z7P3	Gls	Colon	TRUE
ID_2554	-0.500987	8.56283	-1.20856	0.254164	0.839074	-5.12694	Mouse	glutaminase (Fragment)	Gls	F6RDM4	Gls	Colon	FALSE
ID_2579	0.0450434	10.8148	0.372792	0.71695	0.952527	-5.7366	Mouse	glutaminase (Fragment)	Gls	F6U529	Gls	Colon	FALSE
