# Supplementary material for: Diversion of Arginine’s dietary metabolic fate in proteinuric kidney disease
Source: Research Square preprint supplement (doi:10.21203/rs.3.rs-9927381/v1), 2026-06-17
Supplement: Supplementary file 10 [file 4dfebc00afab44b8858a2428.xlsx]

## Sheet: API
Time	Group	n	mean	std	sem	plot_summary
0	Asp/Asn	15	18.7444	5.33464	1.3774	mean ± SEM
0	Control	10	18.8747	7.2643	2.29717	mean ± SEM
4	Asp/Asn	15	15.2833	3.54089	0.914254	mean ± SEM
4	Control	13	15.53	6.60199	1.83106	mean ± SEM
8	Asp/Asn	12	11.7902	1.18988	0.343488	mean ± SEM
8	Control	13	13.292	2.10984	0.585163	mean ± SEM
