# Supplementary material for: Diversion of Arginine’s dietary metabolic fate in proteinuric kidney disease
Source: Research Square preprint supplement (doi:10.21203/rs.3.rs-9927381/v1), 2026-06-17
Supplement: Supplementary file 11 [file 5620844e8dcfb06cc7bbd57a.xlsx]

## Sheet: Sheet1
Metabolite	Metabolite	mass difference	IsotopeLabel	Metabolite_mass_diff	ratio_col_used	Organ	n_Proteinuric_totalrows	n_Control_totalrows	n_nonmissing_ratio_Proteinuric	n_nonmissing_ratio_Control	mean_ratio_Proteinuric	mean_ratio_Control	median_ratio_Proteinuric	median_ratio_Control	log2_ratio_Proteinuric_minus_Control	fold_change_Proteinuric_over_Control	mean_area_Proteinuric	mean_area_Control	log10_area_Proteinuric	log10_area_Control	u_statistic_mannwhitney	pvalue_mannwhitney	p_adj_bh	significant_p_lt_0_05	significant_fdr_lt_0_05
Arginine	Arg	m + 10	13C615N4	Arg (m + 10)	Ratio10To0	Cortex	5	6	5	6	0.368257	0.426671	0.29411	0.429688	-0.212411	0.863094	1.40087e+06	1.2706e+06	6.1464	6.10401	11	0.536797	0.742569	FALSE	FALSE
Arginine	Arg	m + 10	13C615N4	Arg (m + 10)	Ratio10To0	Medulla	5	6	5	6	0.444226	0.437261	0.357632	0.431974	0.0227976	1.01593	1.21396e+06	1.31251e+06	6.0842	6.1181	12	0.662338	0.822554	FALSE	FALSE
Arginine	Arg	m + 10	13C615N4	Arg (m + 10)	Ratio10To0	Liver	5	6	5	6	5.14227	1.67173	3.5932	1.87543	1.62106	3.07601	254790	68904.6	5.40618	4.83825	28	0.017316	0.116532	TRUE	FALSE
Arginine	Arg	m + 10	13C615N4	Arg (m + 10)	Ratio10To0	Heart	5	6	5	6	0.433692	0.438585	0.355617	0.432978	-0.0161854	0.988844	1.17344e+06	1.00579e+06	6.06946	6.00251	11	0.536797	0.742569	FALSE	FALSE
Arginine	Arg	m + 10	13C615N4	Arg (m + 10)	Ratio10To0	Muscle	5	6	5	6	0.500697	0.446277	0.412985	0.438997	0.165998	1.12194	1.72027e+06	2.21462e+06	6.2356	6.3453	15	1	1	FALSE	FALSE
Arginine	Arg	m + 10	13C615N4	Arg (m + 10)	Ratio10To0	Brain	5	6	5	6	0.164006	0.174492	0.144829	0.188454	-0.0894079	0.939908	447725	534964	5.65101	5.72832	14	0.930736	0.969679	FALSE	FALSE
Arginine	Arg	m + 10	13C615N4	Arg (m + 10)	Ratio10To0	Lung	5	6	5	6	0.473044	0.433545	0.355307	0.436834	0.125793	1.09111	1.08947e+06	827089	6.03721	5.91755	12	0.662338	0.822554	FALSE	FALSE
Arginine	Arg	m + 10	13C615N4	Arg (m + 10)	Ratio10To0	Spleen	5	6	5	6	0.4632	0.440138	0.349796	0.414762	0.0736782	1.0524	951742	986852	5.97852	5.99425	11	0.536797	0.742569	FALSE	FALSE
Arginine	Arg	m + 10	13C615N4	Arg (m + 10)	Ratio10To0	Duodenum	5	6	5	6	1.17947	1.24392	1.24503	1.10022	-0.0767592	0.948185	2.99812e+06	2.53417e+06	6.47685	6.40384	15	1	1	FALSE	FALSE
Arginine	Arg	m + 10	13C615N4	Arg (m + 10)	Ratio10To0	Jejunum	5	6	5	6	0.831977	1.16752	0.883309	0.660426	-0.488834	0.712601	2.65975e+06	2.32653e+06	6.42484	6.36671	15	1	1	FALSE	FALSE
Arginine	Arg	m + 10	13C615N4	Arg (m + 10)	Ratio10To0	Ileum	5	6	5	6	0.526742	0.531661	0.428819	0.513943	-0.0134095	0.990748	1.16176e+06	1.33418e+06	6.06511	6.12522	12	0.662338	0.822554	FALSE	FALSE
Arginine	Arg	m + 10	13C615N4	Arg (m + 10)	Ratio10To0	Colon	5	6	5	6	0.455319	0.471614	0.327323	0.459032	-0.0507316	0.965447	697779	723618	5.84372	5.85951	11	0.536797	0.742569	FALSE	FALSE
Arginine	Arg	m + 10	13C615N4	Arg (m + 10)	Ratio10To0	Erythrocytes	5	6	5	6	0.384889	0.42018	0.352601	0.42707	-0.126567	0.916009	1.20112e+06	965132	6.07959	5.98459	10	0.428571	0.662822	FALSE	FALSE
Arginine	Arg	m + 10	13C615N4	Arg (m + 10)	Ratio10To0	Plasma	5	6	5	6	0.572766	0.445719	0.584296	0.409875	0.361813	1.28504	1.63335e+06	1.3284e+06	6.21308	6.12333	17	0.792208	0.882594	FALSE	FALSE
Arginine	Arg	m + 10	13C615N4	Arg (m + 10)	Ratio10To0	Urine	4	6	4	6	7.36611	25.1609	5.53887	24.2828	-1.77221	0.29276	5.88223e+06	4.85569e+06	6.76954	6.68625	1	0.0190476	0.121612	TRUE	FALSE
Ornithine	Orn	m + 7	13C515N2	Orn (m + 7)	Ratio7To0	Cortex	5	6	5	6	1.92725	1.39792	1.81982	1.40988	0.463262	1.37866	293289	100050	5.4673	5.00022	22	0.246753	0.509888	FALSE	FALSE
Ornithine	Orn	m + 7	13C515N2	Orn (m + 7)	Ratio7To0	Medulla	5	6	5	6	1.82348	1.17443	1.47983	1.06845	0.63474	1.55266	217821	125927	5.3381	5.10012	25	0.0822511	0.294684	FALSE	FALSE
Ornithine	Orn	m + 7	13C515N2	Orn (m + 7)	Ratio7To0	Liver	5	6	5	6	0.866505	0.987713	0.684187	0.894795	-0.188884	0.877284	1.07824e+06	851439	6.03272	5.93015	10	0.428571	0.662822	FALSE	FALSE
Ornithine	Orn	m + 7	13C515N2	Orn (m + 7)	Ratio7To0	Heart	5	6	5	6	0.652468	0.505841	0.632045	0.581845	0.367224	1.28987	209847	125901	5.3219	5.10003	19	0.536797	0.742569	FALSE	FALSE
Ornithine	Orn	m + 7	13C515N2	Orn (m + 7)	Ratio7To0	Muscle	5	6	5	6	1.0083	0.769974	1.0578	0.774122	0.389038	1.30952	80845.8	55091.2	4.90766	4.74108	23	0.177489	0.45328	FALSE	FALSE
Ornithine	Orn	m + 7	13C515N2	Orn (m + 7)	Ratio7To0	Brain	5	6	5	6	0.481732	0.245907	0.426216	0.250765	0.970118	1.959	20295.2	10745.2	4.30739	4.03121	27	0.030303	0.157197	TRUE	FALSE
Ornithine	Orn	m + 7	13C515N2	Orn (m + 7)	Ratio7To0	Lung	5	6	5	6	0.88122	0.662923	0.8621	0.641484	0.41066	1.32929	191711	253483	5.28265	5.40395	22	0.246753	0.509888	FALSE	FALSE
Ornithine	Orn	m + 7	13C515N2	Orn (m + 7)	Ratio7To0	Spleen	5	6	5	6	0.651662	0.49492	0.631961	0.482034	0.39693	1.3167	24801.8	27124.3	4.39448	4.43336	22	0.246753	0.509888	FALSE	FALSE
Ornithine	Orn	m + 7	13C515N2	Orn (m + 7)	Ratio7To0	Duodenum	5	6	5	6	1.0317	0.822128	1.15788	0.797917	0.327592	1.25492	307273	288338	5.48752	5.4599	18	0.662338	0.822554	FALSE	FALSE
Ornithine	Orn	m + 7	13C515N2	Orn (m + 7)	Ratio7To0	Jejunum	5	6	5	6	0.778561	0.558765	0.96217	0.263646	0.478569	1.39336	231701	180686	5.36493	5.25693	23	0.177489	0.45328	FALSE	FALSE
Ornithine	Orn	m + 7	13C515N2	Orn (m + 7)	Ratio7To0	Ileum	5	6	5	6	0.399283	0.169959	0.315542	0.164847	1.23222	2.34928	97893	41831.6	4.99075	4.6215	30	0.004329	0.0552781	TRUE	FALSE
Ornithine	Orn	m + 7	13C515N2	Orn (m + 7)	Ratio7To0	Colon	5	6	5	6	0.601022	0.498716	0.619207	0.446122	0.269202	1.20514	120282	81243.5	5.0802	4.90979	18	0.662338	0.822554	FALSE	FALSE
Ornithine	Orn	m + 7	13C515N2	Orn (m + 7)	Ratio7To0	Erythrocytes	5	6	5	6	0.854452	0.763208	0.859021	0.822642	0.162923	1.11955	275226	102123	5.43969	5.00912	18	0.662338	0.822554	FALSE	FALSE
Ornithine	Orn	m + 7	13C515N2	Orn (m + 7)	Ratio7To0	Plasma	5	6	5	6	0.888122	0.673843	0.80323	0.606429	0.398347	1.318	337549	194725	5.52834	5.28942	19	0.536797	0.742569	FALSE	FALSE
Ornithine	Orn	m + 7	13C515N2	Orn (m + 7)	Ratio7To0	Urine	4	6	4	6	8.06987	22.3339	7.32765	20.4094	-1.46862	0.361328	1.00833e+06	550206	6.0036	5.74053	0	0.00952381	0.0817734	TRUE	FALSE
Urea	Urea	m + 3	13C215N1	Urea (m + 3)	Ratio3To0	Cortex	5	6	5	6	0.0469172	0.0630224	0.0472796	0.0619393	-0.425748	0.744453	368923	143924	5.56694	5.15813	0	0.004329	0.0552781	TRUE	FALSE
Urea	Urea	m + 3	13C215N1	Urea (m + 3)	Ratio3To0	Medulla	5	6	5	6	0.0463393	0.0633231	0.047179	0.0620417	-0.450496	0.731791	548997	580451	5.73957	5.76377	0	0.004329	0.0552781	TRUE	FALSE
Urea	Urea	m + 3	13C215N1	Urea (m + 3)	Ratio3To0	Liver	5	6	5	6	0.0459408	0.0618457	0.0458018	0.0600048	-0.428896	0.74283	425757	98367.3	5.62916	4.99285	0	0.004329	0.0552781	TRUE	FALSE
Urea	Urea	m + 3	13C215N1	Urea (m + 3)	Ratio3To0	Heart	5	6	5	6	0.0460061	0.0609321	0.0470104	0.0601424	-0.405376	0.75504	472799	86594.7	5.67468	4.93749	2	0.017316	0.116532	TRUE	FALSE
Urea	Urea	m + 3	13C215N1	Urea (m + 3)	Ratio3To0	Muscle	5	6	5	6	0.0461055	0.0584606	0.0467348	0.0598752	-0.342526	0.788659	367137	83132.5	5.56483	4.91977	0	0.004329	0.0552781	TRUE	FALSE
Urea	Urea	m + 3	13C215N1	Urea (m + 3)	Ratio3To0	Brain	5	6	5	6	0.0487293	0.0674479	0.0471705	0.0631736	-0.468983	0.722474	508951	179399	5.70668	5.25382	0	0.004329	0.0552781	TRUE	FALSE
Urea	Urea	m + 3	13C215N1	Urea (m + 3)	Ratio3To0	Lung	5	6	5	6	0.0465228	0.0688929	0.046636	0.0683936	-0.566416	0.675292	526976	143314	5.72179	5.15629	0	0.004329	0.0552781	TRUE	FALSE
Urea	Urea	m + 3	13C215N1	Urea (m + 3)	Ratio3To0	Spleen	5	6	5	6	0.0458579	0.0593283	0.0464481	0.0564527	-0.371552	0.772951	379260	73356.8	5.57894	4.86544	3	0.030303	0.157197	TRUE	FALSE
Urea	Urea	m + 3	13C215N1	Urea (m + 3)	Ratio3To0	Duodenum	5	6	5	6	0.0495387	0.0887444	0.0507284	0.0900263	-0.841099	0.558218	331593	56867.7	5.52061	4.75487	0	0.004329	0.0552781	TRUE	FALSE
Urea	Urea	m + 3	13C215N1	Urea (m + 3)	Ratio3To0	Jejunum	5	6	5	6	0.0488677	0.0706212	0.049023	0.0659419	-0.531219	0.69197	602196	106275	5.77974	5.02643	1	0.00865801	0.0817734	TRUE	FALSE
Urea	Urea	m + 3	13C215N1	Urea (m + 3)	Ratio3To0	Ileum	5	6	5	6	0.0472679	0.065336	0.0484314	0.0622402	-0.467018	0.723459	262837	78378.1	5.41969	4.89419	0	0.004329	0.0552781	TRUE	FALSE
Urea	Urea	m + 3	13C215N1	Urea (m + 3)	Ratio3To0	Colon	5	6	5	6	0.0471172	0.064142	0.0483105	0.0637352	-0.445015	0.734577	545661	74875.3	5.73692	4.87434	0	0.004329	0.0552781	TRUE	FALSE
Urea	Urea	m + 3	13C215N1	Urea (m + 3)	Ratio3To0	Erythrocytes	5	6	5	6	0.0455192	0.0634339	0.0461194	0.0616732	-0.478781	0.717584	759245	446319	5.88038	5.64965	0	0.004329	0.0552781	TRUE	FALSE
Urea	Urea	m + 3	13C215N1	Urea (m + 3)	Ratio3To0	Plasma	5	6	5	6	0.0436764	0.0626503	0.0445187	0.0611181	-0.520467	0.697146	961194	815186	5.98281	5.91126	0	0.004329	0.0552781	TRUE	FALSE
Urea	Urea	m + 3	13C215N1	Urea (m + 3)	Ratio3To0	Urine	4	6	4	6	0.0462958	0.0673786	0.0473172	0.0645579	-0.541408	0.6871	4.16239e+06	5.44481e+06	6.61934	6.73598	0	0.00952381	0.0817734	TRUE	FALSE
Citrulline	Citr	m + 7	13C515N2	Citr (m + 7)	Ratio7To0	Cortex	5	6	5	6	0.0179709	0.0144326	0.0175676	0.01384	0.316336	1.24516	3440.31	550.394	3.5366	2.74067	20	0.428571	0.662822	FALSE	FALSE
Citrulline	Citr	m + 7	13C515N2	Citr (m + 7)	Ratio7To0	Medulla	5	6	5	6	0.0154055	0.0112342	0.0154942	0.0114106	0.455544	1.3713	6961.53	1003.96	3.8427	3.00172	23	0.177489	0.45328	FALSE	FALSE
Citrulline	Citr	m + 7	13C515N2	Citr (m + 7)	Ratio7To0	Liver	5	6	5	6	0.0536815	0.0356959	0.0604647	0.0348999	0.588667	1.50386	6117.06	1026.85	3.78654	3.01151	24	0.125541	0.390747	FALSE	FALSE
Citrulline	Citr	m + 7	13C515N2	Citr (m + 7)	Ratio7To0	Heart	5	6	5	6	0.0162496	0.0131301	0.0157544	0.0136061	0.307524	1.23758	13033.3	3721.31	4.11505	3.5707	20	0.428571	0.662822	FALSE	FALSE
Citrulline	Citr	m + 7	13C515N2	Citr (m + 7)	Ratio7To0	Muscle	5	6	5	6	0.0141228	0.0113902	0.0137893	0.0116985	0.310234	1.23991	4342.75	2150.02	3.63776	3.33244	20	0.428571	0.662822	FALSE	FALSE
Citrulline	Citr	m + 7	13C515N2	Citr (m + 7)	Ratio7To0	Brain	5	6	5	6	0.0119861	0.00911998	0.0123836	0.0095454	0.394258	1.31427	2824.13	2044.93	3.45089	3.31068	24	0.125541	0.390747	FALSE	FALSE
Citrulline	Citr	m + 7	13C515N2	Citr (m + 7)	Ratio7To0	Lung	5	6	5	6	0.0164109	0.0129597	0.0167284	0.0127491	0.340618	1.2663	2944.25	931.287	3.46897	2.96908	22	0.246753	0.509888	FALSE	FALSE
Citrulline	Citr	m + 7	13C515N2	Citr (m + 7)	Ratio7To0	Spleen	5	6	5	6	0.0150773	0.0114336	0.0158617	0.0116485	0.399104	1.31869	3852.78	1279.89	3.58577	3.10717	21	0.329004	0.602368	FALSE	FALSE
Citrulline	Citr	m + 7	13C515N2	Citr (m + 7)	Ratio7To0	Duodenum	5	6	5	6	0.0146615	0.0114243	0.0139548	0.010991	0.359924	1.28336	5065.28	2306.88	3.7046	3.36303	23	0.177489	0.45328	FALSE	FALSE
Citrulline	Citr	m + 7	13C515N2	Citr (m + 7)	Ratio7To0	Jejunum	5	6	5	6	0.0142735	0.00938618	0.0115898	0.00921046	0.604731	1.5207	3861.51	1501.9	3.58676	3.17664	25	0.0822511	0.294684	FALSE	FALSE
Citrulline	Citr	m + 7	13C515N2	Citr (m + 7)	Ratio7To0	Ileum	5	6	5	6	0.0130637	0.00814663	0.0112999	0.00815402	0.681283	1.60357	4430.74	1495.43	3.64648	3.17477	30	0.004329	0.0552781	TRUE	FALSE
Citrulline	Citr	m + 7	13C515N2	Citr (m + 7)	Ratio7To0	Colon	5	6	5	6	0.0147758	0.0125933	0.0134442	0.0121828	0.230578	1.1733	8025.27	1707.48	3.90446	3.23236	19	0.536797	0.742569	FALSE	FALSE
Citrulline	Citr	m + 7	13C515N2	Citr (m + 7)	Ratio7To0	Erythrocytes	5	6	5	6	0.0146647	0.0113846	0.0153223	0.0115128	0.365267	1.28812	6480.86	1311.96	3.81163	3.11792	20	0.428571	0.662822	FALSE	FALSE
Citrulline	Citr	m + 7	13C515N2	Citr (m + 7)	Ratio7To0	Plasma	5	6	5	6	0.012809	0.00898777	0.0124108	0.00805706	0.511122	1.42516	8040.86	2698.58	3.9053	3.43114	23	0.177489	0.45328	FALSE	FALSE
Citrulline	Citr	m + 7	13C515N2	Citr (m + 7)	Ratio7To0	Urine	4	6	4	6	0.0253184	0.120266	0.0199255	0.108822	-2.24797	0.21052	43803.6	4989.83	4.64151	3.69809	1	0.0190476	0.121612	TRUE	FALSE
Argininosuccinate	ArgSuc	m + 7	13C515N2	ArgSuc (m + 7)	Ratio7To0	Cortex	5	6	5	6	0.464986	0.337977	0.421493	0.317235	0.460262	1.37579	8638.76	3252.55	3.93645	3.51222	23	0.177489	0.45328	FALSE	FALSE
Argininosuccinate	ArgSuc	m + 7	13C515N2	ArgSuc (m + 7)	Ratio7To0	Medulla	5	6	5	6	0.479326	0.36836	0.438758	0.343665	0.379891	1.30124	4087.9	4083.58	3.6115	3.61104	22	0.246753	0.509888	FALSE	FALSE
Argininosuccinate	ArgSuc	m + 7	13C515N2	ArgSuc (m + 7)	Ratio7To0	Liver	5	6	5	6	1.81496	1.28788	1.88362	1.25443	0.494935	1.40926	1028.17	785.143	3.01207	2.89495	23	0.177489	0.45328	FALSE	FALSE
Argininosuccinate	ArgSuc	m + 7	13C515N2	ArgSuc (m + 7)	Ratio7To0	Heart	5	6	5	6	0.237229	0.267855	0.227318	0.265617	-0.175169	0.885664	1419.71	1397.95	3.1522	3.14549	9	0.329004	0.602368	FALSE	FALSE
Argininosuccinate	ArgSuc	m + 7	13C515N2	ArgSuc (m + 7)	Ratio7To0	Muscle	5	6	5	6	0.20718	0.240093	0.185967	0.230452	-0.21271	0.862915	1435.03	3927.4	3.15686	3.59411	7	0.177489	0.45328	FALSE	FALSE
Argininosuccinate	ArgSuc	m + 7	13C515N2	ArgSuc (m + 7)	Ratio7To0	Brain	5	6	5	6	0.15215	0.13246	0.161778	0.131113	0.199935	1.14865	727.847	650.663	2.86204	2.81336	24	0.125541	0.390747	FALSE	FALSE
Argininosuccinate	ArgSuc	m + 7	13C515N2	ArgSuc (m + 7)	Ratio7To0	Lung	5	6	5	6	0.197479	0.197947	0.191368	0.199508	-0.00341693	0.997634	558.986	465.023	2.7474	2.66747	13	0.792208	0.882594	FALSE	FALSE
Argininosuccinate	ArgSuc	m + 7	13C515N2	ArgSuc (m + 7)	Ratio7To0	Spleen	5	6	5	6	0.308341	0.27638	0.274179	0.270647	0.157872	1.11564	853.242	865.216	2.93107	2.93712	17	0.792208	0.882594	FALSE	FALSE
Argininosuccinate	ArgSuc	m + 7	13C515N2	ArgSuc (m + 7)	Ratio7To0	Duodenum	5	6	5	6	0.308673	0.356501	0.248983	0.351201	-0.207827	0.865841	1112.97	1053.4	3.04648	3.02259	9	0.329004	0.602368	FALSE	FALSE
Argininosuccinate	ArgSuc	m + 7	13C515N2	ArgSuc (m + 7)	Ratio7To0	Jejunum	5	6	5	6	0.275576	0.260745	0.217313	0.248328	0.0798089	1.05688	1322.57	809.72	3.12142	2.90833	14	0.930736	0.969679	FALSE	FALSE
Argininosuccinate	ArgSuc	m + 7	13C515N2	ArgSuc (m + 7)	Ratio7To0	Ileum	5	6	5	6	0.280499	0.292394	0.241836	0.254021	-0.0599212	0.959316	1069.19	1730.53	3.02906	3.23818	11	0.536797	0.742569	FALSE	FALSE
Argininosuccinate	ArgSuc	m + 7	13C515N2	ArgSuc (m + 7)	Ratio7To0	Colon	5	6	5	6	0.273112	0.256211	0.221437	0.263652	0.0921602	1.06597	935.634	493.727	2.97111	2.69349	13	0.792208	0.882594	FALSE	FALSE
Argininosuccinate	ArgSuc	m + 7	13C515N2	ArgSuc (m + 7)	Ratio7To0	Erythrocytes	5	6	5	6	0.236227	0.229208	0.196871	0.226425	0.0435152	1.03062	263.355	140.193	2.42054	2.14673	13	0.792208	0.882594	FALSE	FALSE
Argininosuccinate	ArgSuc	m + 7	13C515N2	ArgSuc (m + 7)	Ratio7To0	Plasma	5	6	5	6	0.346826	0.251588	0.295559	0.236982	0.463153	1.37855	289.805	106.816	2.46211	2.02864	21	0.329004	0.602368	FALSE	FALSE
Argininosuccinate	ArgSuc	m + 7	13C515N2	ArgSuc (m + 7)	Ratio7To0	Urine	4	6	4	6	0.335367	0.239306	0.344142	0.266062	0.486889	1.40142	18039.3	5089.7	4.25622	3.70669	19	0.171429	0.45328	FALSE	FALSE
Arginine	Arg	m + 7	13C515N2	Arg (m + 7)	Ratio7To0	Cortex	5	6	5	6	0.459472	0.345004	0.412872	0.334297	0.413361	1.33179	1.80903e+06	1.04467e+06	6.25745	6.01898	22	0.246753	0.509888	FALSE	FALSE
Arginine	Arg	m + 7	13C515N2	Arg (m + 7)	Ratio7To0	Medulla	5	6	5	6	0.427006	0.293971	0.388827	0.292143	0.53858	1.45254	1.21032e+06	903211	6.0829	5.95579	27	0.030303	0.157197	TRUE	FALSE
Arginine	Arg	m + 7	13C515N2	Arg (m + 7)	Ratio7To0	Liver	5	6	5	6	0.215544	0.14998	0.237557	0.150931	0.52321	1.43715	11800.2	6342.47	4.07189	3.80226	25	0.0822511	0.294684	FALSE	FALSE
Arginine	Arg	m + 7	13C515N2	Arg (m + 7)	Ratio7To0	Heart	5	6	5	6	0.211632	0.253623	0.17638	0.245422	-0.261126	0.834436	586571	587264	5.76832	5.76883	8	0.246753	0.509888	FALSE	FALSE
Arginine	Arg	m + 7	13C515N2	Arg (m + 7)	Ratio7To0	Muscle	5	6	5	6	0.193005	0.231185	0.160675	0.223946	-0.260411	0.83485	676023	1.16221e+06	5.82996	6.06528	7	0.177489	0.45328	FALSE	FALSE
Arginine	Arg	m + 7	13C515N2	Arg (m + 7)	Ratio7To0	Brain	5	6	5	6	0.108411	0.107737	0.107549	0.111862	0.00900453	1.00626	297816	329057	5.47395	5.51727	15	1	1	FALSE	FALSE
Arginine	Arg	m + 7	13C515N2	Arg (m + 7)	Ratio7To0	Lung	5	6	5	6	0.216352	0.237907	0.189244	0.230426	-0.137017	0.909398	518979	454011	5.71515	5.65707	11	0.536797	0.742569	FALSE	FALSE
Arginine	Arg	m + 7	13C515N2	Arg (m + 7)	Ratio7To0	Spleen	5	6	5	6	0.26944	0.271885	0.237544	0.25985	-0.0130315	0.991008	568290	612007	5.75457	5.78676	14	0.930736	0.969679	FALSE	FALSE
Arginine	Arg	m + 7	13C515N2	Arg (m + 7)	Ratio7To0	Duodenum	5	6	5	6	0.29637	0.356599	0.25736	0.346164	-0.266904	0.831101	711768	718795	5.85234	5.85661	6	0.125541	0.390747	FALSE	FALSE
Arginine	Arg	m + 7	13C515N2	Arg (m + 7)	Ratio7To0	Jejunum	5	6	5	6	0.287543	0.303842	0.232869	0.286293	-0.0795439	0.946357	978262	706461	5.99045	5.84909	10	0.428571	0.662822	FALSE	FALSE
Arginine	Arg	m + 7	13C515N2	Arg (m + 7)	Ratio7To0	Ileum	5	6	5	6	0.284878	0.301177	0.238523	0.304146	-0.0802679	0.945882	642613	731232	5.80795	5.86406	9	0.329004	0.602368	FALSE	FALSE
Arginine	Arg	m + 7	13C515N2	Arg (m + 7)	Ratio7To0	Colon	5	6	5	6	0.245244	0.255839	0.209409	0.244811	-0.0610213	0.958585	389879	388927	5.59093	5.58987	10	0.428571	0.662822	FALSE	FALSE
Arginine	Arg	m + 7	13C515N2	Arg (m + 7)	Ratio7To0	Erythrocytes	5	6	5	6	0.193624	0.234992	0.188842	0.225596	-0.279357	0.823958	616401	544961	5.78986	5.73637	5	0.0822511	0.294684	FALSE	FALSE
Arginine	Arg	m + 7	13C515N2	Arg (m + 7)	Ratio7To0	Plasma	5	6	5	6	0.292559	0.308734	0.267046	0.294154	-0.0776366	0.947609	881053	923289	5.945	5.96534	11	0.536797	0.742569	FALSE	FALSE
Arginine	Arg	m + 7	13C515N2	Arg (m + 7)	Ratio7To0	Urine	4	6	4	6	0.426155	0.445832	0.399927	0.408465	-0.0651226	0.955864	359465	83970.3	5.55566	4.92413	13	0.914286	0.969679	FALSE	FALSE
Glutamine	Gln	m + 6	13C515N1	Gln (m + 6)	Ratio6To0	Cortex	5	6	5	6	0.000308369	0.00019641	0.000264976	0.000217261	0.650788	1.57003	1459.86	826.961	3.16431	2.91749	30	0.004329	0.0552781	TRUE	FALSE
Glutamine	Gln	m + 6	13C515N1	Gln (m + 6)	Ratio6To0	Medulla	5	6	5	6	0.000377708	0.000188152	0.00030168	0.00019248	1.00537	2.00746	2347.3	1102.02	3.37057	3.04219	29	0.00865801	0.0817734	TRUE	FALSE
Glutamine	Gln	m + 6	13C515N1	Gln (m + 6)	Ratio6To0	Liver	5	6	5	6	0.00150301	0.00073873	0.00154836	0.000671304	1.02473	2.03459	7941.13	3623.23	3.89988	3.5591	25	0.0822511	0.294684	FALSE	FALSE
Glutamine	Gln	m + 6	13C515N1	Gln (m + 6)	Ratio6To0	Heart	5	6	5	6	0.000265279	0.000172195	0.000202602	0.000179382	0.623471	1.54058	3469.19	1962.07	3.54023	3.29271	21	0.329004	0.602368	FALSE	FALSE
Glutamine	Gln	m + 6	13C515N1	Gln (m + 6)	Ratio6To0	Muscle	5	6	5	6	0.000274157	0.000169845	0.000236744	0.000156944	0.690783	1.61416	1032.28	917.611	3.0138	2.96266	27	0.030303	0.157197	TRUE	FALSE
Glutamine	Gln	m + 6	13C515N1	Gln (m + 6)	Ratio6To0	Brain	5	6	5	6	7.20434e-05	6.01963e-05	7.7152e-05	5.95788e-05	0.25919	1.19681	1253.73	962.953	3.0982	2.98361	23	0.177489	0.45328	FALSE	FALSE
Glutamine	Gln	m + 6	13C515N1	Gln (m + 6)	Ratio6To0	Lung	5	6	5	6	0.000370813	0.000229954	0.000284376	0.000234455	0.689347	1.61255	2410.2	1564.4	3.38205	3.19435	25	0.0822511	0.294684	FALSE	FALSE
Glutamine	Gln	m + 6	13C515N1	Gln (m + 6)	Ratio6To0	Spleen	5	6	5	6	0.000396067	0.00021191	0.000269651	0.000205934	0.902292	1.86903	3055.95	1654.78	3.48515	3.21874	24	0.125541	0.390747	FALSE	FALSE
Glutamine	Gln	m + 6	13C515N1	Gln (m + 6)	Ratio6To0	Duodenum	5	6	5	6	0.000418438	0.000241548	0.000304121	0.000254298	0.792701	1.73231	1356.54	723.013	3.13243	2.85915	25	0.0822511	0.294684	FALSE	FALSE
Glutamine	Gln	m + 6	13C515N1	Gln (m + 6)	Ratio6To0	Jejunum	5	6	5	6	0.000339641	0.000210104	0.00031469	0.000214879	0.692907	1.61654	1182.6	602.215	3.07284	2.77975	28	0.017316	0.116532	TRUE	FALSE
Glutamine	Gln	m + 6	13C515N1	Gln (m + 6)	Ratio6To0	Ileum	5	6	5	6	0.00034131	0.000198744	0.000254405	0.000212537	0.780172	1.71734	1534.41	900.703	3.18594	2.95458	26	0.0519481	0.226931	FALSE	FALSE
Glutamine	Gln	m + 6	13C515N1	Gln (m + 6)	Ratio6To0	Colon	5	6	5	6	0.000300689	0.000174686	0.0002317	0.000172606	0.783513	1.72132	2327.81	1206.63	3.36695	3.08157	27	0.030303	0.157197	TRUE	FALSE
Glutamine	Gln	m + 6	13C515N1	Gln (m + 6)	Ratio6To0	Erythrocytes	5	6	5	6	0.000443614	0.000248853	0.000386342	0.000247379	0.834011	1.78264	1514.41	767.094	3.18024	2.88485	28	0.017316	0.116532	TRUE	FALSE
Glutamine	Gln	m + 6	13C515N1	Gln (m + 6)	Ratio6To0	Plasma	5	6	5	6	0.000610447	0.000357752	0.000484991	0.000310077	0.770905	1.70634	3259.37	2192.12	3.51313	3.34086	25	0.0822511	0.294684	FALSE	FALSE
Glutamine	Gln	m + 6	13C515N1	Gln (m + 6)	Ratio6To0	Urine	4	6	4	6	0.000479315	0.000205148	0.000483868	0.000221683	1.22431	2.33644	724.123	170.197	2.85981	2.23095	24	0.00952381	0.0817734	TRUE	FALSE
Glutamate	Glu	m + 6	13C515N1	Glu (m + 6)	Ratio6To0	Cortex	5	6	5	6	0.000504486	0.00032014	0.000479087	0.000308617	0.656111	1.57583	3537.32	2395.81	3.54867	3.37945	26	0.0519481	0.226931	FALSE	FALSE
Glutamate	Glu	m + 6	13C515N1	Glu (m + 6)	Ratio6To0	Medulla	5	6	5	6	0.000465415	0.00020648	0.000466003	0.000215067	1.17251	2.25404	3141.21	1663.94	3.4971	3.22114	30	0.004329	0.0552781	TRUE	FALSE
Glutamate	Glu	m + 6	13C515N1	Glu (m + 6)	Ratio6To0	Liver	5	6	5	6	0.00125677	0.000761479	0.0012088	0.000795865	0.722847	1.65044	774.307	386.781	2.88891	2.58747	23	0.177489	0.45328	FALSE	FALSE
Glutamate	Glu	m + 6	13C515N1	Glu (m + 6)	Ratio6To0	Heart	5	6	5	6	4.91726e-05	3.45156e-05	5.13234e-05	3.8982e-05	0.510604	1.42465	135.165	111.738	2.13086	2.0482	23	0.177489	0.45328	FALSE	FALSE
Glutamate	Glu	m + 6	13C515N1	Glu (m + 6)	Ratio6To0	Muscle	5	6	5	6	0.000223631	0.000147766	0.000210425	0.000140171	0.597805	1.51341	119.226	105.33	2.07637	2.02255	27	0.030303	0.157197	TRUE	FALSE
Glutamate	Glu	m + 6	13C515N1	Glu (m + 6)	Ratio6To0	Brain	5	6	5	6	4.76992e-05	9.70972e-05	3.13274e-05	9.64313e-05	-1.02547	0.491252	434.034	892.003	2.63752	2.95037	4	0.0519481	0.226931	FALSE	FALSE
Glutamate	Glu	m + 6	13C515N1	Glu (m + 6)	Ratio6To0	Lung	5	6	5	6	0.000209987	0.000153301	0.000211149	0.000159884	0.453935	1.36977	567.255	429.939	2.75378	2.63341	27	0.030303	0.157197	TRUE	FALSE
Glutamate	Glu	m + 6	13C515N1	Glu (m + 6)	Ratio6To0	Spleen	5	6	5	6	0.000235903	0.000166504	0.000237755	0.000155291	0.502639	1.4168	1910.01	1243.7	3.28104	3.09472	26	0.0519481	0.226931	FALSE	FALSE
Glutamate	Glu	m + 6	13C515N1	Glu (m + 6)	Ratio6To0	Duodenum	5	6	5	6	0.000212163	0.000203674	0.000187703	0.000173235	0.0589147	1.04168	915.629	1001.32	2.96172	3.00057	19	0.536797	0.742569	FALSE	FALSE
Glutamate	Glu	m + 6	13C515N1	Glu (m + 6)	Ratio6To0	Jejunum	5	6	5	6	0.000187622	0.000156311	0.000189016	0.000164406	0.263403	1.20031	675.245	520.063	2.82946	2.71606	18	0.662338	0.822554	FALSE	FALSE
Glutamate	Glu	m + 6	13C515N1	Glu (m + 6)	Ratio6To0	Ileum	5	6	5	6	0.000199872	0.000126932	0.000162885	0.000128255	0.655026	1.57464	1022.96	718.919	3.00986	2.85668	27	0.030303	0.157197	TRUE	FALSE
Glutamate	Glu	m + 6	13C515N1	Glu (m + 6)	Ratio6To0	Colon	5	6	5	6	0.000153363	0.000111279	0.000146692	0.000108425	0.462773	1.37819	670.666	429.135	2.82651	2.63259	23	0.177489	0.45328	FALSE	FALSE
Glutamate	Glu	m + 6	13C515N1	Glu (m + 6)	Ratio6To0	Erythrocytes	5	6	5	6	0.000679916	0.000471365	0.000696927	0.00042897	0.528514	1.44244	316.42	151.35	2.50026	2.17998	26	0.0519481	0.226931	FALSE	FALSE
Glutamate	Glu	m + 6	13C515N1	Glu (m + 6)	Ratio6To0	Plasma	5	6	5	6	0.000955863	0.000538389	0.000852232	0.000481751	0.828155	1.77541	345.968	228.262	2.53904	2.35843	27	0.030303	0.157197	TRUE	FALSE
Glutamate	Glu	m + 6	13C515N1	Glu (m + 6)	Ratio6To0	Urine	4	6	4	6	0.00107117	0.000687399	0.00106565	0.000701534	0.639971	1.5583	198.82	76.9358	2.29846	1.88613	24	0.00952381	0.0817734	TRUE	FALSE
Glutamate	Glu	m + 5	13C5	Glu (m + 5)	Ratio5To0	Cortex	5	6	5	6	0.00471491	0.00254659	0.0043863	0.00258641	0.888664	1.85146	33049.9	19612.9	4.51917	4.29254	30	0.004329	0.0552781	TRUE	FALSE
Glutamate	Glu	m + 5	13C5	Glu (m + 5)	Ratio5To0	Medulla	5	6	5	6	0.00458321	0.00229224	0.00439398	0.00229153	0.999601	1.99945	31039.1	18881.2	4.49191	4.27603	30	0.004329	0.0552781	TRUE	FALSE
Glutamate	Glu	m + 5	13C5	Glu (m + 5)	Ratio5To0	Liver	5	6	5	6	0.0110536	0.00880545	0.0113317	0.00946719	0.328042	1.25531	7719.12	4467.94	3.88757	3.65011	25	0.0822511	0.294684	FALSE	FALSE
Glutamate	Glu	m + 5	13C5	Glu (m + 5)	Ratio5To0	Heart	5	6	5	6	0.00064034	0.000516403	0.000685234	0.000556435	0.31034	1.24	1774.74	1672.4	3.24914	3.22334	20	0.428571	0.662822	FALSE	FALSE
Glutamate	Glu	m + 5	13C5	Glu (m + 5)	Ratio5To0	Muscle	5	6	5	6	0.00292384	0.00226788	0.00280425	0.00211054	0.366523	1.28924	1579.75	1597.54	3.19859	3.20345	26	0.0519481	0.226931	FALSE	FALSE
Glutamate	Glu	m + 5	13C5	Glu (m + 5)	Ratio5To0	Brain	5	6	5	6	0.000217221	0.000187066	0.000222229	0.000183023	0.215618	1.1612	2055.26	1772.1	3.31287	3.24849	22	0.246753	0.509888	FALSE	FALSE
Glutamate	Glu	m + 5	13C5	Glu (m + 5)	Ratio5To0	Lung	5	6	5	6	0.00189963	0.0018159	0.00188732	0.00171638	0.0650344	1.04611	5166.37	5148.92	3.71319	3.71172	19	0.536797	0.742569	FALSE	FALSE
Glutamate	Glu	m + 5	13C5	Glu (m + 5)	Ratio5To0	Spleen	5	6	5	6	0.00254006	0.00212367	0.00264588	0.00201827	0.258299	1.19607	20618.8	15832.4	4.31426	4.19955	22	0.246753	0.509888	FALSE	FALSE
Glutamate	Glu	m + 5	13C5	Glu (m + 5)	Ratio5To0	Duodenum	5	6	5	6	0.00254645	0.00253461	0.0022322	0.00212927	0.00672339	1.00467	10985	12584.6	4.0408	4.09984	20	0.428571	0.662822	FALSE	FALSE
Glutamate	Glu	m + 5	13C5	Glu (m + 5)	Ratio5To0	Jejunum	5	6	5	6	0.00239315	0.00203326	0.00242833	0.00210346	0.235122	1.17701	8709.71	6783.8	3.94	3.83147	20	0.428571	0.662822	FALSE	FALSE
Glutamate	Glu	m + 5	13C5	Glu (m + 5)	Ratio5To0	Ileum	5	6	5	6	0.00237775	0.00175179	0.00199542	0.00171475	0.440766	1.35733	12321.9	10075.7	4.09068	4.00328	24	0.125541	0.390747	FALSE	FALSE
Glutamate	Glu	m + 5	13C5	Glu (m + 5)	Ratio5To0	Colon	5	6	5	6	0.00183138	0.00146241	0.00170169	0.00140819	0.324588	1.25231	7956.51	5687.43	3.90072	3.75492	22	0.246753	0.509888	FALSE	FALSE
Glutamate	Glu	m + 5	13C5	Glu (m + 5)	Ratio5To0	Erythrocytes	5	6	5	6	0.004013	0.00392801	0.00373884	0.00401931	0.0308826	1.02164	1751.42	1261.81	3.24339	3.101	18	0.662338	0.822554	FALSE	FALSE
Glutamate	Glu	m + 5	13C5	Glu (m + 5)	Ratio5To0	Plasma	5	6	5	6	0.00614809	0.0049813	0.00541176	0.004557	0.303614	1.23423	2234.42	2107.09	3.34917	3.32368	22	0.246753	0.509888	FALSE	FALSE
Glutamate	Glu	m + 5	13C5	Glu (m + 5)	Ratio5To0	Urine	4	6	4	6	0.00552126	0.00243691	0.0052579	0.00240013	1.17995	2.26568	1106.29	270.07	3.04387	2.43148	24	0.00952381	0.0817734	TRUE	FALSE
Aspartate	Asp	m + 4	13C4	Asp (m + 4)	Ratio4To0	Cortex	5	6	5	6	0.00397814	0.00170366	0.00401018	0.00169497	1.22346	2.33506	2884.41	2833.16	3.46006	3.45227	30	0.004329	0.0552781	TRUE	FALSE
Aspartate	Asp	m + 4	13C4	Asp (m + 4)	Ratio4To0	Medulla	5	6	5	6	0.00391108	0.00166236	0.00406729	0.00186024	1.23434	2.35274	2644.25	1532.44	3.4223	3.18538	30	0.004329	0.0552781	TRUE	FALSE
Aspartate	Asp	m + 4	13C4	Asp (m + 4)	Ratio4To0	Liver	5	6	5	6	0.00371623	0.00342726	0.00334499	0.00327362	0.116787	1.08432	511.578	375.793	2.70891	2.57495	17	0.792208	0.882594	FALSE	FALSE
Aspartate	Asp	m + 4	13C4	Asp (m + 4)	Ratio4To0	Heart	5	6	5	6	0.000359588	0.000344342	0.000404995	0.000365037	0.0625023	1.04428	247.446	328.249	2.39348	2.5162	16	0.930736	0.969679	FALSE	FALSE
Aspartate	Asp	m + 4	13C4	Asp (m + 4)	Ratio4To0	Muscle	5	6	5	6	0.00170399	0.00158205	0.00170485	0.00147592	0.107117	1.07707	81.9348	114.673	1.91347	2.05946	19	0.536797	0.742569	FALSE	FALSE
Aspartate	Asp	m + 4	13C4	Asp (m + 4)	Ratio4To0	Brain	5	6	5	6	0.00021267	0.000178841	0.000222854	0.000176855	0.249941	1.18916	567.257	662.451	2.75378	2.82115	24	0.125541	0.390747	FALSE	FALSE
Aspartate	Asp	m + 4	13C4	Asp (m + 4)	Ratio4To0	Lung	5	6	5	6	0.0019431	0.00197747	0.00191593	0.00185901	-0.0252971	0.982618	867.727	1173.42	2.93838	3.06945	14	0.930736	0.969679	FALSE	FALSE
Aspartate	Asp	m + 4	13C4	Asp (m + 4)	Ratio4To0	Spleen	5	6	5	6	0.00283234	0.00229769	0.00308949	0.00231181	0.301807	1.23269	10031.5	8051.02	4.00136	3.90585	25	0.0822511	0.294684	FALSE	FALSE
Aspartate	Asp	m + 4	13C4	Asp (m + 4)	Ratio4To0	Duodenum	5	6	5	6	0.00246004	0.00245701	0.0023575	0.00217417	0.00177483	1.00123	1514.79	1356.56	3.18035	3.13244	19	0.536797	0.742569	FALSE	FALSE
Aspartate	Asp	m + 4	13C4	Asp (m + 4)	Ratio4To0	Jejunum	5	6	5	6	0.00255253	0.00207188	0.0023132	0.00222283	0.300985	1.23199	1394.19	971.6	3.14432	2.98749	19	0.536797	0.742569	FALSE	FALSE
Aspartate	Asp	m + 4	13C4	Asp (m + 4)	Ratio4To0	Ileum	5	6	5	6	0.00252285	0.00208981	0.00229796	0.00202988	0.271688	1.20722	2187.85	2002.15	3.34002	3.3015	23	0.177489	0.45328	FALSE	FALSE
Aspartate	Asp	m + 4	13C4	Asp (m + 4)	Ratio4To0	Colon	5	6	5	6	0.00182997	0.00163747	0.00164178	0.0016875	0.160354	1.11756	1197.88	825.774	3.07841	2.91686	19	0.536797	0.742569	FALSE	FALSE
Aspartate	Asp	m + 4	13C4	Asp (m + 4)	Ratio4To0	Erythrocytes	5	6	5	6	0.00264442	0.00176061	0.00276006	0.00173182	0.586873	1.50199	184.496	44.9377	2.26599	1.65261	23	0.177489	0.45328	FALSE	FALSE
Aspartate	Asp	m + 4	13C4	Asp (m + 4)	Ratio4To0	Plasma	5	6	5	6	0.0021439	0.00132809	0.00215104	0.00107824	0.690887	1.61428	5.70078	4.45623	0.755935	0.648968	22	0.246753	0.509888	FALSE	FALSE
Aspartate	Asp	m + 4	13C4	Asp (m + 4)	Ratio4To0	Urine	4	6	4	6	0.00200551	0.00254748	0.00194711	0.00300235	-0.345104	0.787251	32.6137	14.5974	1.5134	1.16428	8	0.47619	0.734188	FALSE	FALSE
Aspartate	Asp	m + 5	13C415N1	Asp (m + 5)	Ratio5To0	Cortex	5	6	5	6	0.000293748	0.000145235	0.000272887	0.000141339	1.01619	2.02257	210.357	243.631	2.32296	2.38673	29	0.00865801	0.0817734	TRUE	FALSE
Aspartate	Asp	m + 5	13C415N1	Asp (m + 5)	Ratio5To0	Medulla	5	6	5	6	0.0003655	0.000127349	0.000387794	0.000136721	1.52108	2.87006	245.713	118.877	2.39043	2.0751	30	0.004329	0.0552781	TRUE	FALSE
Aspartate	Asp	m + 5	13C415N1	Asp (m + 5)	Ratio5To0	Liver	5	6	5	6	0.000760179	0.00167876	0.000852086	0.00143065	-1.14298	0.452823	102.64	217.376	2.01132	2.33721	10	0.428571	0.662822	FALSE	FALSE
Aspartate	Asp	m + 5	13C415N1	Asp (m + 5)	Ratio5To0	Heart	5	6	5	6	3.14456e-05	6.89774e-05	3.51225e-05	6.77299e-05	-1.13327	0.455882	22.0987	58.3049	1.34437	1.76571	0	0.004329	0.0552781	TRUE	FALSE
Aspartate	Asp	m + 5	13C415N1	Asp (m + 5)	Ratio5To0	Muscle	5	6	5	6	0.000355472	0.000314888	0.000435128	0.000300898	0.174899	1.12889	15.2069	20.2003	1.18204	1.30536	14	0.930736	0.969679	FALSE	FALSE
Aspartate	Asp	m + 5	13C415N1	Asp (m + 5)	Ratio5To0	Brain	5	6	5	6	2.03752e-05	1.32447e-05	2.05104e-05	1.4253e-05	0.621403	1.53837	53.2492	49.6717	1.72631	1.69611	27	0.030303	0.157197	TRUE	FALSE
Aspartate	Asp	m + 5	13C415N1	Asp (m + 5)	Ratio5To0	Lung	5	6	5	6	0.000350299	0.00043786	0.000373025	0.000442132	-0.321883	0.800025	149.057	270.538	2.17335	2.43223	8	0.246753	0.509888	FALSE	FALSE
Aspartate	Asp	m + 5	13C415N1	Asp (m + 5)	Ratio5To0	Spleen	5	6	5	6	0.000237172	0.000301682	0.000254612	0.000277177	-0.347094	0.786166	840.522	1049.72	2.92455	3.02108	4	0.0519481	0.226931	FALSE	FALSE
Aspartate	Asp	m + 5	13C415N1	Asp (m + 5)	Ratio5To0	Duodenum	5	6	5	6	0.000409075	0.000570133	0.000304823	0.000506766	-0.478933	0.717508	251.341	300.585	2.40026	2.47797	6	0.125541	0.390747	FALSE	FALSE
Aspartate	Asp	m + 5	13C415N1	Asp (m + 5)	Ratio5To0	Jejunum	5	6	5	6	0.000957012	0.000916028	0.000839988	0.000892948	0.0631457	1.04474	503.066	402.516	2.70162	2.60478	13	0.792208	0.882594	FALSE	FALSE
Aspartate	Asp	m + 5	13C415N1	Asp (m + 5)	Ratio5To0	Ileum	5	6	5	6	0.000521694	0.000661954	0.000517968	0.000742099	-0.343528	0.788112	466.838	635.662	2.66917	2.80323	8	0.246753	0.509888	FALSE	FALSE
Aspartate	Asp	m + 5	13C415N1	Asp (m + 5)	Ratio5To0	Colon	5	6	5	6	0.000164796	0.000128785	0.000170599	0.000137226	0.35572	1.27962	105.115	65.0204	2.02166	1.81305	21	0.329004	0.602368	FALSE	FALSE
Aspartate	Asp	m + 5	13C415N1	Asp (m + 5)	Ratio5To0	Erythrocytes	5	6	5	6	0.000524035	0.000522049	0.000331593	0.000521557	0.00547751	1.0038	22.8454	10.7146	1.3588	1.02998	12	0.662338	0.822554	FALSE	FALSE
Aspartate	Asp	m + 5	13C415N1	Asp (m + 5)	Ratio5To0	Plasma	5	6	5	6	0.00380508	0.00474788	0.00496874	0.00322259	-0.319356	0.801428	7.98993	13.8062	0.902543	1.14007	13	0.792208	0.882594	FALSE	FALSE
Aspartate	Asp	m + 5	13C415N1	Asp (m + 5)	Ratio5To0	Urine	4	6	4	6	0.00356368	0.00458966	0.00365806	0.00395602	-0.365018	0.776459	50.5322	25.1942	1.70357	1.4013	10	0.761905	0.882594	FALSE	FALSE
Aspartate	Asp	m + 1	15N1	Asp (m + 1)	Ratio1To0	Cortex	5	6	5	6	0.11183	0.104161	0.11214	0.104683	0.102487	1.07362	82236	179300	4.91506	5.25358	25	0.0822511	0.294684	FALSE	FALSE
Aspartate	Asp	m + 1	15N1	Asp (m + 1)	Ratio1To0	Medulla	5	6	5	6	0.111388	0.100356	0.111651	0.10237	0.150465	1.10993	75035.4	94757.8	4.87527	4.97661	30	0.004329	0.0552781	TRUE	FALSE
Aspartate	Asp	m + 1	15N1	Asp (m + 1)	Ratio1To0	Liver	5	6	5	6	0.100492	0.0964601	0.100762	0.0962535	0.0590775	1.0418	15557.7	10852.9	4.19195	4.03554	21	0.329004	0.602368	FALSE	FALSE
Aspartate	Asp	m + 1	15N1	Asp (m + 1)	Ratio1To0	Heart	5	6	5	6	0.095982	0.0941632	0.0952776	0.0946361	0.0276002	1.01932	64985.5	87459.1	4.81282	4.9418	18	0.662338	0.822554	FALSE	FALSE
Aspartate	Asp	m + 1	15N1	Asp (m + 1)	Ratio1To0	Muscle	5	6	5	6	0.0924154	0.0959641	0.0980065	0.0952225	-0.0543612	0.963021	4594.04	6734.32	3.66219	3.82829	12	0.662338	0.822554	FALSE	FALSE
Aspartate	Asp	m + 1	15N1	Asp (m + 1)	Ratio1To0	Brain	5	6	5	6	0.0871159	0.080876	0.0869752	0.0810541	0.107225	1.07715	228328	301587	5.35856	5.47941	29	0.00865801	0.0817734	TRUE	FALSE
Aspartate	Asp	m + 1	15N1	Asp (m + 1)	Ratio1To0	Lung	5	6	5	6	0.096509	0.095923	0.0957221	0.0962037	0.0087867	1.00611	43067.4	55562.6	4.63415	4.74478	16	0.930736	0.969679	FALSE	FALSE
Aspartate	Asp	m + 1	15N1	Asp (m + 1)	Ratio1To0	Spleen	5	6	5	6	0.106325	0.095541	0.106523	0.0954491	0.154293	1.11288	377217	335169	5.57659	5.52526	30	0.004329	0.0552781	TRUE	FALSE
Aspartate	Asp	m + 1	15N1	Asp (m + 1)	Ratio1To0	Duodenum	5	6	5	6	0.106891	0.103301	0.108166	0.102128	0.0492889	1.03475	65768.2	56568.1	4.81802	4.75257	18	0.662338	0.822554	FALSE	FALSE
Aspartate	Asp	m + 1	15N1	Asp (m + 1)	Ratio1To0	Jejunum	5	6	5	6	0.103439	0.101071	0.106555	0.101092	0.0334099	1.02343	56118.8	45921	4.74911	4.66201	18	0.662338	0.822554	FALSE	FALSE
Aspartate	Asp	m + 1	15N1	Asp (m + 1)	Ratio1To0	Ileum	5	6	5	6	0.108562	0.0971307	0.108059	0.0984029	0.16052	1.11769	96165.8	90634.6	4.98302	4.95729	30	0.004329	0.0552781	TRUE	FALSE
Aspartate	Asp	m + 1	15N1	Asp (m + 1)	Ratio1To0	Colon	5	6	5	6	0.104053	0.0987427	0.104192	0.0993173	0.0755748	1.05378	69230.1	49719.3	4.84029	4.69653	30	0.004329	0.0552781	TRUE	FALSE
Aspartate	Asp	m + 1	15N1	Asp (m + 1)	Ratio1To0	Erythrocytes	5	6	5	6	0.09088	0.0873511	0.0924578	0.0863298	0.0571367	1.0404	7161.89	2031.62	3.85503	3.30784	22	0.246753	0.509888	FALSE	FALSE
Aspartate	Asp	m + 1	15N1	Asp (m + 1)	Ratio1To0	Plasma	5	6	5	6	0.0862028	0.0995937	0.081905	0.0993381	-0.208321	0.865544	203.93	331.968	2.30948	2.5211	7	0.177489	0.45328	FALSE	FALSE
Aspartate	Asp	m + 1	15N1	Asp (m + 1)	Ratio1To0	Urine	4	6	4	6	0.108879	0.142823	0.103214	0.120311	-0.391512	0.76233	1753.71	790.293	3.24396	2.89779	10	0.761905	0.882594	FALSE	FALSE
Urea	Urea	m + 1	15N1	Urea (m + 1)	Ratio1To0	Cortex	5	6	5	6	5.45182e-05	4.61792e-05	5.51997e-05	4.56078e-05	0.239495	1.18058	432.447	104.231	2.63593	2.018	29	0.00865801	0.0817734	TRUE	FALSE
Urea	Urea	m + 1	15N1	Urea (m + 1)	Ratio1To0	Medulla	5	6	5	6	5.32119e-05	4.59938e-05	5.30103e-05	4.75973e-05	0.210312	1.15694	628.535	416.824	2.79833	2.61995	30	0.004329	0.0552781	TRUE	FALSE
Urea	Urea	m + 1	15N1	Urea (m + 1)	Ratio1To0	Liver	5	6	5	6	5.72815e-05	5.76569e-05	5.6992e-05	4.39271e-05	-0.00942367	0.993489	523.415	72.3713	2.71885	1.85957	23	0.177489	0.45328	FALSE	FALSE
Urea	Urea	m + 1	15N1	Urea (m + 1)	Ratio1To0	Heart	5	6	5	6	5.88902e-05	5.58048e-05	5.98804e-05	5.3533e-05	0.077637	1.05529	596.877	82.2158	2.77588	1.91496	20	0.428571	0.662822	FALSE	FALSE
Urea	Urea	m + 1	15N1	Urea (m + 1)	Ratio1To0	Muscle	5	6	5	6	6.01342e-05	5.1906e-05	6.00235e-05	5.73791e-05	0.212286	1.15852	485.188	69.7756	2.68591	1.8437	25	0.0822511	0.294684	FALSE	FALSE
Urea	Urea	m + 1	15N1	Urea (m + 1)	Ratio1To0	Brain	5	6	5	6	6.10362e-05	5.10584e-05	6.06489e-05	4.93503e-05	0.257518	1.19542	640.696	138.202	2.80665	2.14052	27	0.030303	0.157197	TRUE	FALSE
Urea	Urea	m + 1	15N1	Urea (m + 1)	Ratio1To0	Lung	5	6	5	6	5.77987e-05	5.45583e-05	5.61959e-05	5.48071e-05	0.0832403	1.05939	664.054	112.898	2.8222	2.05269	22	0.246753	0.509888	FALSE	FALSE
Urea	Urea	m + 1	15N1	Urea (m + 1)	Ratio1To0	Spleen	5	6	5	6	5.88676e-05	6.53901e-05	5.8493e-05	6.28149e-05	-0.151598	0.900253	490.13	69.1633	2.69031	1.83988	12	0.662338	0.822554	FALSE	FALSE
Urea	Urea	m + 1	15N1	Urea (m + 1)	Ratio1To0	Duodenum	5	6	5	6	6.17643e-05	6.81485e-05	6.22437e-05	6.8929e-05	-0.141909	0.906319	420.841	44.2906	2.62412	1.64631	10	0.428571	0.662822	FALSE	FALSE
Urea	Urea	m + 1	15N1	Urea (m + 1)	Ratio1To0	Jejunum	5	6	5	6	6.12123e-05	5.8574e-05	6.05624e-05	5.37055e-05	0.0635608	1.04504	737.852	68.8439	2.86797	1.83787	20	0.428571	0.662822	FALSE	FALSE
Urea	Urea	m + 1	15N1	Urea (m + 1)	Ratio1To0	Ileum	5	6	5	6	6.34005e-05	6.07002e-05	6.43532e-05	6.06895e-05	0.062793	1.04449	355.405	69.7159	2.55072	1.84333	18	0.662338	0.822554	FALSE	FALSE
Urea	Urea	m + 1	15N1	Urea (m + 1)	Ratio1To0	Colon	5	6	5	6	6.24157e-05	4.98606e-05	6.18063e-05	5.14142e-05	0.324008	1.2518	718.34	57.7301	2.85633	1.7614	30	0.004329	0.0552781	TRUE	FALSE
Urea	Urea	m + 1	15N1	Urea (m + 1)	Ratio1To0	Erythrocytes	5	6	5	6	5.81923e-05	5.26575e-05	5.89191e-05	5.1885e-05	0.14419	1.10511	980.525	374.53	2.99146	2.57349	24	0.125541	0.390747	FALSE	FALSE
Urea	Urea	m + 1	15N1	Urea (m + 1)	Ratio1To0	Plasma	5	6	5	6	5.68482e-05	5.20616e-05	5.60915e-05	5.28967e-05	0.126896	1.09194	1255.72	677.904	3.09889	2.83117	29	0.00865801	0.0817734	TRUE	FALSE
Urea	Urea	m + 1	15N1	Urea (m + 1)	Ratio1To0	Urine	4	6	4	6	5.70934e-05	4.74555e-05	5.72219e-05	4.90366e-05	0.266748	1.20309	5136.75	3922.79	3.71069	3.59359	24	0.00952381	0.0817734	TRUE	FALSE
Citrate	Cit	m + 4	13C4	Cit (m + 4)	Ratio4To0	Cortex	5	6	5	6	0.000626516	0.000307616	0.000649886	0.000322749	1.02622	2.03668	486.453	142.064	2.68704	2.15248	30	0.004329	0.0552781	TRUE	FALSE
Citrate	Cit	m + 4	13C4	Cit (m + 4)	Ratio4To0	Medulla	5	6	5	6	0.000512934	0.000250006	0.000537858	0.000261899	1.03681	2.05168	640.159	436.475	2.80629	2.63996	30	0.004329	0.0552781	TRUE	FALSE
Citrate	Cit	m + 4	13C4	Cit (m + 4)	Ratio4To0	Liver	5	6	5	6	0.00056577	0.000653442	0.000540997	0.000714663	-0.207842	0.865832	78.6534	58.2671	1.89572	1.76542	10	0.428571	0.662822	FALSE	FALSE
Citrate	Cit	m + 4	13C4	Cit (m + 4)	Ratio4To0	Heart	5	6	5	6	8.73715e-05	6.08887e-05	6.40074e-05	6.13025e-05	0.520989	1.43494	100.871	100.025	2.00377	2.00011	16	0.930736	0.969679	FALSE	FALSE
Citrate	Cit	m + 4	13C4	Cit (m + 4)	Ratio4To0	Muscle	0	0	0	0														FALSE	FALSE
Citrate	Cit	m + 4	13C4	Cit (m + 4)	Ratio4To0	Brain	0	0	0	0														FALSE	FALSE
Citrate	Cit	m + 4	13C4	Cit (m + 4)	Ratio4To0	Lung	0	0	0	0														FALSE	FALSE
Citrate	Cit	m + 4	13C4	Cit (m + 4)	Ratio4To0	Spleen	0	0	0	0														FALSE	FALSE
Citrate	Cit	m + 4	13C4	Cit (m + 4)	Ratio4To0	Duodenum	0	0	0	0														FALSE	FALSE
Citrate	Cit	m + 4	13C4	Cit (m + 4)	Ratio4To0	Jejunum	0	0	0	0														FALSE	FALSE
Citrate	Cit	m + 4	13C4	Cit (m + 4)	Ratio4To0	Ileum	0	0	0	0														FALSE	FALSE
Citrate	Cit	m + 4	13C4	Cit (m + 4)	Ratio4To0	Colon	0	0	0	0														FALSE	FALSE
Citrate	Cit	m + 4	13C4	Cit (m + 4)	Ratio4To0	Erythrocytes	0	0	0	0														FALSE	FALSE
Citrate	Cit	m + 4	13C4	Cit (m + 4)	Ratio4To0	Plasma	5	6	5	6	0.00158789	0.00162867	0.00114039	0.00147554	-0.0365868	0.974959	34.0196	30.3191	1.53173	1.48172	14	0.930736	0.969679	FALSE	FALSE
Citrate	Cit	m + 4	13C4	Cit (m + 4)	Ratio4To0	Urine	4	6	4	6	0.0001918	6.79607e-05	0.000193575	4.79944e-05	1.49683	2.82223	159.895	108.244	2.20383	2.0344	21	0.0666667	0.283761	FALSE	FALSE
Malate	Mal	m + 4	13C4	Mal (m + 4)	Ratio4To0	Cortex	5	6	5	6	0.00325988	0.00158102	0.00327899	0.00170042	1.04396	2.06188	6298.23	1222.72	3.79922	3.08733	30	0.004329	0.0552781	TRUE	FALSE
Malate	Mal	m + 4	13C4	Mal (m + 4)	Ratio4To0	Medulla	5	6	5	6	0.00296807	0.00133629	0.00310587	0.00138538	1.1513	2.22113	8762.63	2413.4	3.94263	3.38263	30	0.004329	0.0552781	TRUE	FALSE
Malate	Mal	m + 4	13C4	Mal (m + 4)	Ratio4To0	Liver	5	6	5	6	0.00441044	0.00331277	0.00392767	0.00287237	0.412882	1.33134	3686.02	2805.82	3.56656	3.44806	20	0.428571	0.662822	FALSE	FALSE
Malate	Mal	m + 4	13C4	Mal (m + 4)	Ratio4To0	Heart	5	6	5	6	0.000305956	0.000266535	0.000308172	0.000291063	0.198997	1.1479	1554.99	1114.38	3.19173	3.04703	20	0.428571	0.662822	FALSE	FALSE
Malate	Mal	m + 4	13C4	Mal (m + 4)	Ratio4To0	Muscle	0	0	0	0														FALSE	FALSE
Malate	Mal	m + 4	13C4	Mal (m + 4)	Ratio4To0	Brain	0	0	0	0														FALSE	FALSE
Malate	Mal	m + 4	13C4	Mal (m + 4)	Ratio4To0	Lung	0	0	0	0														FALSE	FALSE
Malate	Mal	m + 4	13C4	Mal (m + 4)	Ratio4To0	Spleen	0	0	0	0														FALSE	FALSE
Malate	Mal	m + 4	13C4	Mal (m + 4)	Ratio4To0	Duodenum	0	0	0	0														FALSE	FALSE
Malate	Mal	m + 4	13C4	Mal (m + 4)	Ratio4To0	Jejunum	0	0	0	0														FALSE	FALSE
Malate	Mal	m + 4	13C4	Mal (m + 4)	Ratio4To0	Ileum	0	0	0	0														FALSE	FALSE
Malate	Mal	m + 4	13C4	Mal (m + 4)	Ratio4To0	Colon	0	0	0	0														FALSE	FALSE
Malate	Mal	m + 4	13C4	Mal (m + 4)	Ratio4To0	Erythrocytes	0	0	0	0														FALSE	FALSE
Malate	Mal	m + 4	13C4	Mal (m + 4)	Ratio4To0	Plasma	5	6	5	6	0.00242391	0.0023461	0.00229284	0.00224366	0.0470734	1.03317	1978.63	1334.74	3.29637	3.1254	17	0.792208	0.882594	FALSE	FALSE
Malate	Mal	m + 4	13C4	Mal (m + 4)	Ratio4To0	Urine	4	6	4	6	0.00316581	0.00525107	0.00324338	0.00482827	-0.730036	0.602889	166.684	136.61	2.22189	2.13548	6	0.257143	0.526984	FALSE	FALSE
