# Supplementary material for: Diversion of Arginine’s dietary metabolic fate in proteinuric kidney disease
Source: Research Square preprint supplement (doi:10.21203/rs.3.rs-9927381/v1), 2026-06-17
Supplement: Supplementary file 13 [file 742b12ef43040a0bfebcf7e1.xlsx]

## Sheet: SupplementaryTable_long
Metabolite	Metabolite_abbrev	Organ	ControlCondition	ProteinuricCondition	n_Control	n_Proteinuric	mean_area_Control	mean_area_Proteinuric	log10_mean_area_Control	log10_mean_area_Proteinuric	delta_log10_mean	test	u_statistic	p_value	significant_p_lt_0_05	dot_radius_relative	p_adj_bh	significant_fdr_lt_0_05
Arginine	Arg	Kid. Cortex	Control_ControlDiet	Proteinuric_ControlDiet	6	4	5870179	5.64809e+06	6.76865	6.7519	-0.0167495	mannwhitneyu_two-sided	13	0.914286	FALSE	0.25	0.974619	FALSE
Arginine	Arg	Medulla	Control_ControlDiet	Proteinuric_ControlDiet	6	4	5.29644e+06	5.58637e+06	6.72398	6.74713	0.0231458	mannwhitneyu_two-sided	10	0.761905	FALSE	0.25	0.930233	FALSE
Arginine	Arg	Liver	Control_ControlDiet	Proteinuric_ControlDiet	6	4	49061.1	67008.2	4.69074	4.82613	0.135391	mannwhitneyu_two-sided	19	0.171429	FALSE	0.25	0.580645	FALSE
Arginine	Arg	Heart	Control_ControlDiet	Proteinuric_ControlDiet	6	4	4.70947e+06	4.15202e+06	6.67297	6.61826	-0.0547121	mannwhitneyu_two-sided	7	0.352381	FALSE	0.25	0.698113	FALSE
Arginine	Arg	Muscle	Control_ControlDiet	Proteinuric_ControlDiet	6	4	7.65007e+06	8.15537e+06	6.88367	6.91144	0.0277781	mannwhitneyu_two-sided	13	0.914286	FALSE	0.25	0.974619	FALSE
Arginine	Arg	Brain	Control_ControlDiet	Proteinuric_ControlDiet	6	4	4.44545e+06	4.14622e+06	6.64792	6.61765	-0.0302637	mannwhitneyu_two-sided	9	0.609524	FALSE	0.25	0.825806	FALSE
Arginine	Arg	Lung	Control_ControlDiet	Proteinuric_ControlDiet	6	4	5.29134e+06	4.46831e+06	6.72357	6.65014	-0.073423	mannwhitneyu_two-sided	4	0.114286	FALSE	0.25	0.48	FALSE
Arginine	Arg	Spleen	Control_ControlDiet	Proteinuric_ControlDiet	6	4	3.99425e+06	3.99437e+06	6.60143	6.60145	1.30904e-05	mannwhitneyu_two-sided	10	0.761905	FALSE	0.25	0.930233	FALSE
Arginine	Arg	Duodenum	Control_ControlDiet	Proteinuric_ControlDiet	6	4	8.54842e+06	9.49652e+06	6.93189	6.97756	0.0456783	mannwhitneyu_two-sided	15	0.609524	FALSE	0.25	0.825806	FALSE
Arginine	Arg	Jejunum	Control_ControlDiet	Proteinuric_ControlDiet	6	4	1.15021e+07	7.70889e+06	7.06078	6.88699	-0.173784	mannwhitneyu_two-sided	7	0.352381	FALSE	0.25	0.698113	FALSE
Arginine	Arg	Ileum	Control_ControlDiet	Proteinuric_ControlDiet	6	4	6.38136e+06	5.66485e+06	6.80491	6.75319	-0.0517251	mannwhitneyu_two-sided	9	0.609524	FALSE	0.25	0.825806	FALSE
Arginine	Arg	Colon	Control_ControlDiet	Proteinuric_ControlDiet	6	4	2.98498e+06	3.20483e+06	6.47494	6.5058	0.0308635	mannwhitneyu_two-sided	16	0.47619	FALSE	0.25	0.806452	FALSE
Arginine	Arg	Erythrocytes	Control_ControlDiet	Proteinuric_ControlDiet	6	4	5.09368e+06	5.53984e+06	6.70703	6.7435	0.036466	mannwhitneyu_two-sided	15	0.609524	FALSE	0.25	0.825806	FALSE
Arginine	Arg	Plasma	Control_ControlDiet	Proteinuric_ControlDiet	6	4	6.42968e+06	6.45878e+06	6.80819	6.81015	0.00196128	mannwhitneyu_two-sided	11	0.914286	FALSE	0.25	0.974619	FALSE
Arginine	Arg	Urine	Control_ControlDiet	Proteinuric_ControlDiet	4	3	850548	963113	5.9297	5.98368	0.0539781	mannwhitneyu_two-sided	7	0.857143	FALSE	0.25	0.974619	FALSE
Ornithine	Orn	Kid. Cortex	Control_ControlDiet	Proteinuric_ControlDiet	6	4	121577	141427	5.08485	5.15053	0.0656791	mannwhitneyu_two-sided	18	0.257143	FALSE	0.25	0.650602	FALSE
Ornithine	Orn	Medulla	Control_ControlDiet	Proteinuric_ControlDiet	6	4	197609	183863	5.29581	5.26449	-0.0313122	mannwhitneyu_two-sided	7	0.352381	FALSE	0.25	0.698113	FALSE
Ornithine	Orn	Liver	Control_ControlDiet	Proteinuric_ControlDiet	6	4	2.36953e+06	2.79734e+06	6.37466	6.44675	0.0720842	mannwhitneyu_two-sided	20	0.114286	FALSE	0.25	0.48	FALSE
Ornithine	Orn	Heart	Control_ControlDiet	Proteinuric_ControlDiet	6	4	289421	474128	5.46153	5.6759	0.214365	mannwhitneyu_two-sided	20	0.114286	FALSE	0.25	0.48	FALSE
Ornithine	Orn	Muscle	Control_ControlDiet	Proteinuric_ControlDiet	6	4	126235	173712	5.10118	5.23983	0.13865	mannwhitneyu_two-sided	20	0.114286	FALSE	0.25	0.48	FALSE
Ornithine	Orn	Brain	Control_ControlDiet	Proteinuric_ControlDiet	6	4	49003.5	54011	4.69023	4.73248	0.0422547	mannwhitneyu_two-sided	15	0.609524	FALSE	0.25	0.825806	FALSE
Ornithine	Orn	Lung	Control_ControlDiet	Proteinuric_ControlDiet	6	4	225619	352479	5.35338	5.54713	0.193758	mannwhitneyu_two-sided	17	0.352381	FALSE	0.25	0.698113	FALSE
Ornithine	Orn	Spleen	Control_ControlDiet	Proteinuric_ControlDiet	6	4	124214	112421	5.09417	5.05085	-0.0433221	mannwhitneyu_two-sided	12	1	FALSE	0.25	1	FALSE
Ornithine	Orn	Duodenum	Control_ControlDiet	Proteinuric_ControlDiet	6	4	588309	463868	5.76961	5.66639	-0.103211	mannwhitneyu_two-sided	5	0.171429	FALSE	0.25	0.580645	FALSE
Ornithine	Orn	Jejunum	Control_ControlDiet	Proteinuric_ControlDiet	6	4	494603	534141	5.69426	5.72766	0.0333992	mannwhitneyu_two-sided	18	0.257143	FALSE	0.25	0.650602	FALSE
Ornithine	Orn	Ileum	Control_ControlDiet	Proteinuric_ControlDiet	6	4	271043	354696	5.43304	5.54986	0.116817	mannwhitneyu_two-sided	16	0.47619	FALSE	0.25	0.806452	FALSE
Ornithine	Orn	Colon	Control_ControlDiet	Proteinuric_ControlDiet	6	4	244653	346652	5.38855	5.53989	0.151343	mannwhitneyu_two-sided	23	0.0190476	TRUE	0.25	0.285714	FALSE
Ornithine	Orn	Erythrocytes	Control_ControlDiet	Proteinuric_ControlDiet	6	4	403406	501732	5.60574	5.70047	0.0947292	mannwhitneyu_two-sided	17	0.352381	FALSE	0.25	0.698113	FALSE
Ornithine	Orn	Plasma	Control_ControlDiet	Proteinuric_ControlDiet	6	4	551078	620035	5.74121	5.79242	0.0512032	mannwhitneyu_two-sided	13	0.914286	FALSE	0.25	0.974619	FALSE
Ornithine	Orn	Urine	Control_ControlDiet	Proteinuric_ControlDiet	4	3	94600.4	90472.3	4.97589	4.95652	-0.0193773	mannwhitneyu_two-sided	8	0.628571	FALSE	0.25	0.846154	FALSE
Urea	Urea	Kid. Cortex	Control_ControlDiet	Proteinuric_ControlDiet	6	4	2.45383e+06	2.79253e+06	6.38984	6.446	0.0561534	mannwhitneyu_two-sided	11	0.914286	FALSE	0.25	0.974619	FALSE
Urea	Urea	Medulla	Control_ControlDiet	Proteinuric_ControlDiet	6	4	7.63768e+06	6.91429e+06	6.88296	6.83975	-0.0432141	mannwhitneyu_two-sided	11	0.914286	FALSE	0.25	0.974619	FALSE
Urea	Urea	Liver	Control_ControlDiet	Proteinuric_ControlDiet	6	4	1.01975e+06	4.18402e+06	6.00849	6.62159	0.613099	mannwhitneyu_two-sided	19	0.171429	FALSE	0.25	0.580645	FALSE
Urea	Urea	Heart	Control_ControlDiet	Proteinuric_ControlDiet	6	4	4.20699e+06	8.06261e+06	6.62397	6.90648	0.282504	mannwhitneyu_two-sided	16	0.47619	FALSE	0.25	0.806452	FALSE
Urea	Urea	Muscle	Control_ControlDiet	Proteinuric_ControlDiet	6	4	1378152	3.69752e+06	6.1393	6.56791	0.428614	mannwhitneyu_two-sided	24	0.00952381	TRUE	0.25	0.285714	FALSE
Urea	Urea	Brain	Control_ControlDiet	Proteinuric_ControlDiet	6	4	2.88971e+06	4.85716e+06	6.46085	6.68638	0.225528	mannwhitneyu_two-sided	21	0.0666667	FALSE	0.25	0.411765	FALSE
Urea	Urea	Lung	Control_ControlDiet	Proteinuric_ControlDiet	6	4	2.66882e+06	2.90049e+06	6.42632	6.46247	0.0361531	mannwhitneyu_two-sided	14	0.761905	FALSE	0.25	0.930233	FALSE
Urea	Urea	Spleen	Control_ControlDiet	Proteinuric_ControlDiet	6	4	1.45155e+06	3.34808e+06	6.16183	6.5248	0.362963	mannwhitneyu_two-sided	19	0.171429	FALSE	0.25	0.580645	FALSE
Urea	Urea	Duodenum	Control_ControlDiet	Proteinuric_ControlDiet	6	4	658453	1.4887e+06	5.81853	6.17281	0.354281	mannwhitneyu_two-sided	24	0.00952381	TRUE	0.25	0.285714	FALSE
Urea	Urea	Jejunum	Control_ControlDiet	Proteinuric_ControlDiet	6	4	1.20082e+06	5.16006e+06	6.07948	6.71265	0.633176	mannwhitneyu_two-sided	23	0.0190476	TRUE	0.25	0.285714	FALSE
Urea	Urea	Ileum	Control_ControlDiet	Proteinuric_ControlDiet	6	4	1.48029e+06	3.39365e+06	6.17035	6.53067	0.36032	mannwhitneyu_two-sided	19	0.171429	FALSE	0.25	0.580645	FALSE
Urea	Urea	Colon	Control_ControlDiet	Proteinuric_ControlDiet	6	4	1.16538e+06	7.08872e+06	6.06647	6.85057	0.7841	mannwhitneyu_two-sided	23	0.0190476	TRUE	0.25	0.285714	FALSE
Urea	Urea	Erythrocytes	Control_ControlDiet	Proteinuric_ControlDiet	6	4	9.26128e+06	1.21736e+07	6.96667	7.08542	0.118748	mannwhitneyu_two-sided	22	0.0380952	TRUE	0.25	0.347826	FALSE
Urea	Urea	Plasma	Control_ControlDiet	Proteinuric_ControlDiet	6	4	1.56536e+07	1.85254e+07	7.19461	7.26777	0.0731535	mannwhitneyu_two-sided	22	0.0380952	TRUE	0.25	0.347826	FALSE
Urea	Urea	Urine	Control_ControlDiet	Proteinuric_ControlDiet	4	3	94622208	9.49354e+07	7.97599	7.97743	0.0014352	mannwhitneyu_two-sided	6	1	FALSE	0.25	1	FALSE
Citrulline	Citr	Kid. Cortex	Control_ControlDiet	Proteinuric_ControlDiet	6	4	56791.7	124251	4.75428	5.0943	0.340016	mannwhitneyu_two-sided	24	0.00952381	TRUE	0.25	0.285714	FALSE
Citrulline	Citr	Medulla	Control_ControlDiet	Proteinuric_ControlDiet	6	4	129790	344242	5.11324	5.53686	0.423622	mannwhitneyu_two-sided	24	0.00952381	TRUE	0.25	0.285714	FALSE
Citrulline	Citr	Liver	Control_ControlDiet	Proteinuric_ControlDiet	6	4	83881.4	258704	4.92367	5.4128	0.489138	mannwhitneyu_two-sided	17	0.352381	FALSE	0.25	0.698113	FALSE
Citrulline	Citr	Heart	Control_ControlDiet	Proteinuric_ControlDiet	6	4	775867	1.32676e+06	5.88979	6.12279	0.233007	mannwhitneyu_two-sided	19	0.171429	FALSE	0.25	0.580645	FALSE
Citrulline	Citr	Muscle	Control_ControlDiet	Proteinuric_ControlDiet	6	4	187028	383706	5.27191	5.584	0.312092	mannwhitneyu_two-sided	19	0.171429	FALSE	0.25	0.580645	FALSE
Citrulline	Citr	Brain	Control_ControlDiet	Proteinuric_ControlDiet	6	4	346028	462758	5.53911	5.66535	0.126243	mannwhitneyu_two-sided	17	0.352381	FALSE	0.25	0.698113	FALSE
Citrulline	Citr	Lung	Control_ControlDiet	Proteinuric_ControlDiet	6	4	121595	143734	5.08491	5.15756	0.0726449	mannwhitneyu_two-sided	13	0.914286	FALSE	0.25	0.974619	FALSE
Citrulline	Citr	Spleen	Control_ControlDiet	Proteinuric_ControlDiet	6	4	204298	319663	5.31026	5.50469	0.194428	mannwhitneyu_two-sided	22	0.0380952	TRUE	0.25	0.347826	FALSE
Citrulline	Citr	Duodenum	Control_ControlDiet	Proteinuric_ControlDiet	6	4	440221	597692	5.64367	5.77648	0.132807	mannwhitneyu_two-sided	17	0.352381	FALSE	0.25	0.698113	FALSE
Citrulline	Citr	Jejunum	Control_ControlDiet	Proteinuric_ControlDiet	6	4	311682	421810	5.49371	5.62512	0.131405	mannwhitneyu_two-sided	14	0.761905	FALSE	0.25	0.930233	FALSE
Citrulline	Citr	Ileum	Control_ControlDiet	Proteinuric_ControlDiet	6	4	267964	518578	5.42808	5.71481	0.286738	mannwhitneyu_two-sided	22	0.0380952	TRUE	0.25	0.347826	FALSE
Citrulline	Citr	Colon	Control_ControlDiet	Proteinuric_ControlDiet	6	4	296121	814554	5.47147	5.91092	0.43945	mannwhitneyu_two-sided	21	0.0666667	FALSE	0.25	0.411765	FALSE
Citrulline	Citr	Erythrocytes	Control_ControlDiet	Proteinuric_ControlDiet	6	4	346279	591035	5.53943	5.77161	0.232188	mannwhitneyu_two-sided	20	0.114286	FALSE	0.25	0.48	FALSE
Citrulline	Citr	Plasma	Control_ControlDiet	Proteinuric_ControlDiet	6	4	567408	736073	5.7539	5.86692	0.113025	mannwhitneyu_two-sided	20	0.114286	FALSE	0.25	0.48	FALSE
Citrulline	Citr	Urine	Control_ControlDiet	Proteinuric_ControlDiet	4	3	67461.3	262667	4.82905	5.41941	0.590351	mannwhitneyu_two-sided	12	0.0571429	FALSE	0.25	0.411765	FALSE
Argininosuccinate	ArgSuc	Kid. Cortex	Control_ControlDiet	Proteinuric_ControlDiet	6	4	18308.3	19461.5	4.26265	4.28918	0.02653	mannwhitneyu_two-sided	12	1	FALSE	0.25	1	FALSE
Argininosuccinate	ArgSuc	Medulla	Control_ControlDiet	Proteinuric_ControlDiet	6	4	15900.6	20325.2	4.20141	4.30804	0.106623	mannwhitneyu_two-sided	15	0.609524	FALSE	0.25	0.825806	FALSE
Argininosuccinate	ArgSuc	Liver	Control_ControlDiet	Proteinuric_ControlDiet	6	4	1833.65	2775.76	3.26332	3.44338	0.180065	mannwhitneyu_two-sided	21	0.0666667	FALSE	0.25	0.411765	FALSE
Argininosuccinate	ArgSuc	Heart	Control_ControlDiet	Proteinuric_ControlDiet	6	4	10402.2	12413.8	4.01713	4.09391	0.0767809	mannwhitneyu_two-sided	14	0.761905	FALSE	0.25	0.930233	FALSE
Argininosuccinate	ArgSuc	Muscle	Control_ControlDiet	Proteinuric_ControlDiet	6	4	10251.1	16217.9	4.01077	4.20999	0.199225	mannwhitneyu_two-sided	19	0.171429	FALSE	0.25	0.580645	FALSE
Argininosuccinate	ArgSuc	Brain	Control_ControlDiet	Proteinuric_ControlDiet	6	4	7002.13	6460.3	3.84523	3.81025	-0.0349774	mannwhitneyu_two-sided	7	0.352381	FALSE	0.25	0.698113	FALSE
Argininosuccinate	ArgSuc	Lung	Control_ControlDiet	Proteinuric_ControlDiet	6	4	5052.2	3080.39	3.70348	3.48861	-0.214874	mannwhitneyu_two-sided	5	0.171429	FALSE	0.25	0.580645	FALSE
Argininosuccinate	ArgSuc	Spleen	Control_ControlDiet	Proteinuric_ControlDiet	6	4	4684.67	4261.53	3.67068	3.62957	-0.0411134	mannwhitneyu_two-sided	8	0.47619	FALSE	0.25	0.806452	FALSE
Argininosuccinate	ArgSuc	Duodenum	Control_ControlDiet	Proteinuric_ControlDiet	6	4	10795	7497.78	4.03322	3.87493	-0.158289	mannwhitneyu_two-sided	6	0.257143	FALSE	0.25	0.650602	FALSE
Argininosuccinate	ArgSuc	Jejunum	Control_ControlDiet	Proteinuric_ControlDiet	6	4	20567.3	12848.5	4.31318	4.10885	-0.204325	mannwhitneyu_two-sided	6	0.257143	FALSE	0.25	0.650602	FALSE
Argininosuccinate	ArgSuc	Ileum	Control_ControlDiet	Proteinuric_ControlDiet	6	4	10404.1	9603.43	4.01721	3.98243	-0.0347801	mannwhitneyu_two-sided	11	0.914286	FALSE	0.25	0.974619	FALSE
Argininosuccinate	ArgSuc	Colon	Control_ControlDiet	Proteinuric_ControlDiet	6	4	4449.39	5456.67	3.6483	3.73693	0.0886268	mannwhitneyu_two-sided	17	0.352381	FALSE	0.25	0.698113	FALSE
Argininosuccinate	ArgSuc	Erythrocytes	Control_ControlDiet	Proteinuric_ControlDiet	6	4	1808.67	1683.31	3.25736	3.22616	-0.0311963	mannwhitneyu_two-sided	11	0.914286	FALSE	0.25	0.974619	FALSE
Argininosuccinate	ArgSuc	Plasma	Control_ControlDiet	Proteinuric_ControlDiet	6	4	808.905	1077.93	2.9079	3.03259	0.124692	mannwhitneyu_two-sided	18	0.257143	FALSE	0.25	0.650602	FALSE
Argininosuccinate	ArgSuc	Urine	Control_ControlDiet	Proteinuric_ControlDiet	4	3	25700.7	22005.3	4.40994	4.34253	-0.067417	mannwhitneyu_two-sided	7	0.857143	FALSE	0.25	0.974619	FALSE
Glutamate	Glu	Kid. Cortex	Control_ControlDiet	Proteinuric_ControlDiet	6	4	8.98607e+06	8.64361e+06	6.95357	6.93669	-0.0168748	mannwhitneyu_two-sided	9	0.609524	FALSE	0.25	0.825806	FALSE
Glutamate	Glu	Medulla	Control_ControlDiet	Proteinuric_ControlDiet	6	4	7.11179e+06	8.19505e+06	6.85198	6.91355	0.061573	mannwhitneyu_two-sided	16	0.47619	FALSE	0.25	0.806452	FALSE
Glutamate	Glu	Liver	Control_ControlDiet	Proteinuric_ControlDiet	6	4	689211	651010	5.83835	5.81359	-0.0247642	mannwhitneyu_two-sided	11	0.914286	FALSE	0.25	0.974619	FALSE
Glutamate	Glu	Heart	Control_ControlDiet	Proteinuric_ControlDiet	6	4	4.56842e+06	4.24003e+06	6.65977	6.62737	-0.0323971	mannwhitneyu_two-sided	8	0.47619	FALSE	0.25	0.806452	FALSE
Glutamate	Glu	Muscle	Control_ControlDiet	Proteinuric_ControlDiet	6	4	349579	417896	5.54354	5.62107	0.077523	mannwhitneyu_two-sided	14	0.761905	FALSE	0.25	0.930233	FALSE
Glutamate	Glu	Brain	Control_ControlDiet	Proteinuric_ControlDiet	6	4	1.02149e+07	8469301	7.00924	6.92785	-0.0813884	mannwhitneyu_two-sided	0	0.00952381	TRUE	0.25	0.285714	FALSE
Glutamate	Glu	Lung	Control_ControlDiet	Proteinuric_ControlDiet	6	4	3.12759e+06	2.74808e+06	6.49521	6.43903	-0.0561803	mannwhitneyu_two-sided	10	0.761905	FALSE	0.25	0.930233	FALSE
Glutamate	Glu	Spleen	Control_ControlDiet	Proteinuric_ControlDiet	6	4	8031983	7.95234e+06	6.90482	6.90049	-0.00432789	mannwhitneyu_two-sided	12	1	FALSE	0.25	1	FALSE
Glutamate	Glu	Duodenum	Control_ControlDiet	Proteinuric_ControlDiet	6	4	6.01634e+06	5.11299e+06	6.77933	6.70868	-0.0706575	mannwhitneyu_two-sided	4	0.114286	FALSE	0.25	0.48	FALSE
Glutamate	Glu	Jejunum	Control_ControlDiet	Proteinuric_ControlDiet	6	4	4.21266e+06	3.32385e+06	6.62456	6.52164	-0.102916	mannwhitneyu_two-sided	6	0.257143	FALSE	0.25	0.650602	FALSE
Glutamate	Glu	Ileum	Control_ControlDiet	Proteinuric_ControlDiet	6	4	5.029e+06	7527466	6.70148	6.87665	0.175167	mannwhitneyu_two-sided	23	0.0190476	TRUE	0.25	0.285714	FALSE
Glutamate	Glu	Colon	Control_ControlDiet	Proteinuric_ControlDiet	6	4	4.36506e+06	4.20888e+06	6.63999	6.62417	-0.0158238	mannwhitneyu_two-sided	11	0.914286	FALSE	0.25	0.974619	FALSE
Glutamate	Glu	Erythrocytes	Control_ControlDiet	Proteinuric_ControlDiet	6	4	258281	267984	5.41209	5.42811	0.0160172	mannwhitneyu_two-sided	12	1	FALSE	0.25	1	FALSE
Glutamate	Glu	Plasma	Control_ControlDiet	Proteinuric_ControlDiet	6	4	164750	150849	5.21683	5.17854	-0.0382832	mannwhitneyu_two-sided	9	0.609524	FALSE	0.25	0.825806	FALSE
Glutamate	Glu	Urine	Control_ControlDiet	Proteinuric_ControlDiet	4	3	79039.7	90818.3	4.89785	4.95817	0.0603281	mannwhitneyu_two-sided	9	0.4	FALSE	0.25	0.756757	FALSE
Glutamine	Gln	Kid. Cortex	Control_ControlDiet	Proteinuric_ControlDiet	6	4	4.32875e+06	4.36006e+06	6.63636	6.63949	0.00313017	mannwhitneyu_two-sided	15	0.609524	FALSE	0.25	0.825806	FALSE
Glutamine	Gln	Medulla	Control_ControlDiet	Proteinuric_ControlDiet	6	4	6.07343e+06	6.97484e+06	6.78343	6.84353	0.0601005	mannwhitneyu_two-sided	19	0.171429	FALSE	0.25	0.580645	FALSE
Glutamine	Gln	Liver	Control_ControlDiet	Proteinuric_ControlDiet	6	4	8.40809e+06	8.01934e+06	6.9247	6.90414	-0.0205589	mannwhitneyu_two-sided	12	1	FALSE	0.25	1	FALSE
Glutamine	Gln	Heart	Control_ControlDiet	Proteinuric_ControlDiet	6	4	1.50676e+07	1.67261e+07	7.17804	7.22339	0.0453503	mannwhitneyu_two-sided	17	0.352381	FALSE	0.25	0.698113	FALSE
Glutamine	Gln	Muscle	Control_ControlDiet	Proteinuric_ControlDiet	6	4	3.64672e+06	4.41893e+06	6.5619	6.64532	0.0834145	mannwhitneyu_two-sided	17	0.352381	FALSE	0.25	0.698113	FALSE
Glutamine	Gln	Brain	Control_ControlDiet	Proteinuric_ControlDiet	6	4	1.64467e+07	18397328	7.21608	7.26475	0.048677	mannwhitneyu_two-sided	22	0.0380952	TRUE	0.25	0.347826	FALSE
Glutamine	Gln	Lung	Control_ControlDiet	Proteinuric_ControlDiet	6	4	6.43137e+06	5.77409e+06	6.8083	6.76148	-0.0468198	mannwhitneyu_two-sided	10	0.761905	FALSE	0.25	0.930233	FALSE
Glutamine	Gln	Spleen	Control_ControlDiet	Proteinuric_ControlDiet	6	4	8.30065e+06	8.76456e+06	6.91911	6.94273	0.0236183	mannwhitneyu_two-sided	17	0.352381	FALSE	0.25	0.698113	FALSE
Glutamine	Gln	Duodenum	Control_ControlDiet	Proteinuric_ControlDiet	6	4	3.85257e+06	3.98724e+06	6.58575	6.60067	0.0149211	mannwhitneyu_two-sided	12	1	FALSE	0.25	1	FALSE
Glutamine	Gln	Jejunum	Control_ControlDiet	Proteinuric_ControlDiet	6	4	4.07726e+06	3.17323e+06	6.61037	6.5015	-0.108868	mannwhitneyu_two-sided	7	0.352381	FALSE	0.25	0.698113	FALSE
Glutamine	Gln	Ileum	Control_ControlDiet	Proteinuric_ControlDiet	6	4	4.37401e+06	5.88613e+06	6.64088	6.76983	0.128951	mannwhitneyu_two-sided	18	0.257143	FALSE	0.25	0.650602	FALSE
Glutamine	Gln	Colon	Control_ControlDiet	Proteinuric_ControlDiet	6	4	8.24857e+06	8.90909e+06	6.91638	6.94983	0.0334549	mannwhitneyu_two-sided	12	1	FALSE	0.25	1	FALSE
Glutamine	Gln	Erythrocytes	Control_ControlDiet	Proteinuric_ControlDiet	6	4	3.88771e+06	4.0494e+06	6.58969	6.60739	0.0176967	mannwhitneyu_two-sided	15	0.609524	FALSE	0.25	0.825806	FALSE
Glutamine	Gln	Plasma	Control_ControlDiet	Proteinuric_ControlDiet	6	4	7.0759e+06	6306066	6.84978	6.79976	-0.0500233	mannwhitneyu_two-sided	4	0.114286	FALSE	0.25	0.48	FALSE
Glutamine	Gln	Urine	Control_ControlDiet	Proteinuric_ControlDiet	4	3	855674	870069	5.93231	5.93955	0.00724554	mannwhitneyu_two-sided	6	1	FALSE	0.25	1	FALSE
Aspartate	Asp	Kid. Cortex	Control_ControlDiet	Proteinuric_ControlDiet	6	4	1.83879e+06	1.985e+06	6.26453	6.29776	0.0332281	mannwhitneyu_two-sided	15	0.609524	FALSE	0.25	0.825806	FALSE
Aspartate	Asp	Medulla	Control_ControlDiet	Proteinuric_ControlDiet	6	4	826455	1.24778e+06	5.91722	6.09614	0.178917	mannwhitneyu_two-sided	24	0.00952381	TRUE	0.25	0.285714	FALSE
Aspartate	Asp	Liver	Control_ControlDiet	Proteinuric_ControlDiet	6	4	191329	246749	5.28178	5.39226	0.110476	mannwhitneyu_two-sided	16	0.47619	FALSE	0.25	0.806452	FALSE
Aspartate	Asp	Heart	Control_ControlDiet	Proteinuric_ControlDiet	6	4	1.25486e+06	1.52209e+06	6.0986	6.18244	0.0838447	mannwhitneyu_two-sided	13	0.914286	FALSE	0.25	0.974619	FALSE
Aspartate	Asp	Muscle	Control_ControlDiet	Proteinuric_ControlDiet	6	4	33878.7	58122.3	4.52993	4.76434	0.234416	mannwhitneyu_two-sided	18	0.257143	FALSE	0.25	0.650602	FALSE
Aspartate	Asp	Brain	Control_ControlDiet	Proteinuric_ControlDiet	6	4	3.35016e+06	3.26514e+06	6.52506	6.5139	-0.0111627	mannwhitneyu_two-sided	11	0.914286	FALSE	0.25	0.974619	FALSE
Aspartate	Asp	Lung	Control_ControlDiet	Proteinuric_ControlDiet	6	4	634347	671293	5.80233	5.82691	0.0245855	mannwhitneyu_two-sided	12	1	FALSE	0.25	1	FALSE
Aspartate	Asp	Spleen	Control_ControlDiet	Proteinuric_ControlDiet	6	4	3.91393e+06	3.99948e+06	6.59261	6.602	0.00939103	mannwhitneyu_two-sided	15	0.609524	FALSE	0.25	0.825806	FALSE
Aspartate	Asp	Duodenum	Control_ControlDiet	Proteinuric_ControlDiet	6	4	767540	674723	5.8851	5.82913	-0.0559752	mannwhitneyu_two-sided	10	0.761905	FALSE	0.25	0.930233	FALSE
Aspartate	Asp	Jejunum	Control_ControlDiet	Proteinuric_ControlDiet	6	4	789487	500768	5.89735	5.69964	-0.197709	mannwhitneyu_two-sided	4	0.114286	FALSE	0.25	0.48	FALSE
Aspartate	Asp	Ileum	Control_ControlDiet	Proteinuric_ControlDiet	6	4	817577	1.12879e+06	5.91253	6.05261	0.140084	mannwhitneyu_two-sided	20	0.114286	FALSE	0.25	0.48	FALSE
Aspartate	Asp	Colon	Control_ControlDiet	Proteinuric_ControlDiet	6	4	692634	763777	5.8405	5.88297	0.0424626	mannwhitneyu_two-sided	17	0.352381	FALSE	0.25	0.698113	FALSE
Aspartate	Asp	Erythrocytes	Control_ControlDiet	Proteinuric_ControlDiet	6	4	40094.5	69036.3	4.60309	4.83908	0.235992	mannwhitneyu_two-sided	19	0.171429	FALSE	0.25	0.580645	FALSE
Aspartate	Asp	Plasma	Control_ControlDiet	Proteinuric_ControlDiet	6	4	3594.41	3823.19	3.55563	3.58243	0.0267983	mannwhitneyu_two-sided	13	0.914286	FALSE	0.25	0.974619	FALSE
Aspartate	Asp	Urine	Control_ControlDiet	Proteinuric_ControlDiet	4	3	7184.6	10950.3	3.8564	4.03943	0.183025	mannwhitneyu_two-sided	9	0.4	FALSE	0.25	0.756757	FALSE
Proline	Pro	Kid. Cortex	Control_ControlDiet	Proteinuric_ControlDiet	6	4	525807	612969	5.72083	5.78744	0.0666121	mannwhitneyu_two-sided	18	0.257143	FALSE	0.25	0.650602	FALSE
Proline	Pro	Medulla	Control_ControlDiet	Proteinuric_ControlDiet	6	4	613157	858732	5.78757	5.93386	0.146286	mannwhitneyu_two-sided	18	0.257143	FALSE	0.25	0.650602	FALSE
Proline	Pro	Liver	Control_ControlDiet	Proteinuric_ControlDiet	6	4	464936	535790	5.66739	5.72899	0.0616018	mannwhitneyu_two-sided	14	0.761905	FALSE	0.25	0.930233	FALSE
Proline	Pro	Heart	Control_ControlDiet	Proteinuric_ControlDiet	6	4	176000	214935	5.24551	5.33231	0.0867966	mannwhitneyu_two-sided	18	0.257143	FALSE	0.25	0.650602	FALSE
Proline	Pro	Muscle	Control_ControlDiet	Proteinuric_ControlDiet	6	4	241918	416571	5.38367	5.61969	0.23602	mannwhitneyu_two-sided	20	0.114286	FALSE	0.25	0.48	FALSE
Proline	Pro	Brain	Control_ControlDiet	Proteinuric_ControlDiet	6	4	269194	278276	5.43007	5.44448	0.0144098	mannwhitneyu_two-sided	13	0.914286	FALSE	0.25	0.974619	FALSE
Proline	Pro	Lung	Control_ControlDiet	Proteinuric_ControlDiet	6	4	320162	249928	5.50537	5.39781	-0.107556	mannwhitneyu_two-sided	9	0.609524	FALSE	0.25	0.825806	FALSE
Proline	Pro	Spleen	Control_ControlDiet	Proteinuric_ControlDiet	6	4	690522	711891	5.83918	5.85241	0.0132362	mannwhitneyu_two-sided	15	0.609524	FALSE	0.25	0.825806	FALSE
Proline	Pro	Duodenum	Control_ControlDiet	Proteinuric_ControlDiet	6	4	1.00344e+06	967144	6.00149	5.98549	-0.0160005	mannwhitneyu_two-sided	10	0.761905	FALSE	0.25	0.930233	FALSE
Proline	Pro	Jejunum	Control_ControlDiet	Proteinuric_ControlDiet	6	4	1.31526e+06	998632	6.11901	5.99941	-0.119605	mannwhitneyu_two-sided	8	0.47619	FALSE	0.25	0.806452	FALSE
Proline	Pro	Ileum	Control_ControlDiet	Proteinuric_ControlDiet	6	4	870169	1033480	5.9396	6.0143	0.0746985	mannwhitneyu_two-sided	15	0.609524	FALSE	0.25	0.825806	FALSE
Proline	Pro	Colon	Control_ControlDiet	Proteinuric_ControlDiet	6	4	504005	659087	5.70243	5.81894	0.116508	mannwhitneyu_two-sided	18	0.257143	FALSE	0.25	0.650602	FALSE
Proline	Pro	Erythrocytes	Control_ControlDiet	Proteinuric_ControlDiet	6	4	255766	290423	5.40784	5.46303	0.0551881	mannwhitneyu_two-sided	17	0.352381	FALSE	0.25	0.698113	FALSE
Proline	Pro	Plasma	Control_ControlDiet	Proteinuric_ControlDiet	6	4	503133	511244	5.70168	5.70863	0.00694466	mannwhitneyu_two-sided	15	0.609524	FALSE	0.25	0.825806	FALSE
Proline	Pro	Urine	Control_ControlDiet	Proteinuric_ControlDiet	4	3	53834.2	82400.6	4.73106	4.91593	0.184872	mannwhitneyu_two-sided	9	0.4	FALSE	0.25	0.756757	FALSE
4-hydroxyproline	4OHPro	Kid. Cortex	Control_ControlDiet	Proteinuric_ControlDiet	6	4	269267	324450	5.43018	5.51115	0.0809653	mannwhitneyu_two-sided	17	0.352381	FALSE	0.25	0.698113	FALSE
4-hydroxyproline	4OHPro	Medulla	Control_ControlDiet	Proteinuric_ControlDiet	6	4	232667	444281	5.36673	5.64766	0.280923	mannwhitneyu_two-sided	23	0.0190476	TRUE	0.25	0.285714	FALSE
4-hydroxyproline	4OHPro	Liver	Control_ControlDiet	Proteinuric_ControlDiet	6	4	154121	294197	5.18786	5.46864	0.280776	mannwhitneyu_two-sided	18	0.257143	FALSE	0.25	0.650602	FALSE
4-hydroxyproline	4OHPro	Heart	Control_ControlDiet	Proteinuric_ControlDiet	6	4	256380	437954	5.40888	5.64143	0.232545	mannwhitneyu_two-sided	21	0.0666667	FALSE	0.25	0.411765	FALSE
4-hydroxyproline	4OHPro	Muscle	Control_ControlDiet	Proteinuric_ControlDiet	6	4	349055	730295	5.54289	5.8635	0.320605	mannwhitneyu_two-sided	20	0.114286	FALSE	0.25	0.48	FALSE
4-hydroxyproline	4OHPro	Brain	Control_ControlDiet	Proteinuric_ControlDiet	6	4	161769	183134	5.2089	5.26277	0.053874	mannwhitneyu_two-sided	23	0.0190476	TRUE	0.25	0.285714	FALSE
4-hydroxyproline	4OHPro	Lung	Control_ControlDiet	Proteinuric_ControlDiet	6	4	202421	199942	5.30626	5.3009	-0.00535227	mannwhitneyu_two-sided	13	0.914286	FALSE	0.25	0.974619	FALSE
4-hydroxyproline	4OHPro	Spleen	Control_ControlDiet	Proteinuric_ControlDiet	6	4	270689	393117	5.43247	5.59452	0.162051	mannwhitneyu_two-sided	21	0.0666667	FALSE	0.25	0.411765	FALSE
4-hydroxyproline	4OHPro	Duodenum	Control_ControlDiet	Proteinuric_ControlDiet	6	4	237338	320936	5.37537	5.50642	0.131052	mannwhitneyu_two-sided	20	0.114286	FALSE	0.25	0.48	FALSE
4-hydroxyproline	4OHPro	Jejunum	Control_ControlDiet	Proteinuric_ControlDiet	6	4	214077	249640	5.33057	5.39731	0.066744	mannwhitneyu_two-sided	15	0.609524	FALSE	0.25	0.825806	FALSE
4-hydroxyproline	4OHPro	Ileum	Control_ControlDiet	Proteinuric_ControlDiet	6	4	225830	382354	5.35378	5.58247	0.228683	mannwhitneyu_two-sided	21	0.0666667	FALSE	0.25	0.411765	FALSE
4-hydroxyproline	4OHPro	Colon	Control_ControlDiet	Proteinuric_ControlDiet	6	4	242542	319223	5.38479	5.50409	0.119307	mannwhitneyu_two-sided	18	0.257143	FALSE	0.25	0.650602	FALSE
4-hydroxyproline	4OHPro	Erythrocytes	Control_ControlDiet	Proteinuric_ControlDiet	6	4	109203	198767	5.03824	5.29835	0.260109	mannwhitneyu_two-sided	22	0.0380952	TRUE	0.25	0.347826	FALSE
4-hydroxyproline	4OHPro	Plasma	Control_ControlDiet	Proteinuric_ControlDiet	6	4	335660	385679	5.5259	5.58623	0.0603265	mannwhitneyu_two-sided	18	0.257143	FALSE	0.25	0.650602	FALSE
4-hydroxyproline	4OHPro	Urine	Control_ControlDiet	Proteinuric_ControlDiet	4	3	87906.5	144922	4.94402	5.16113	0.217113	mannwhitneyu_two-sided	11	0.114286	FALSE	0.25	0.48	FALSE
Agmatine	Agm	Kid. Cortex	Control_ControlDiet	Proteinuric_ControlDiet	6	4	768.796	860.505	2.88581	2.93475	0.0489427	mannwhitneyu_two-sided	17	0.352381	FALSE	0.25	0.698113	FALSE
Agmatine	Agm	Medulla	Control_ControlDiet	Proteinuric_ControlDiet	6	4	736.032	589.641	2.8669	2.77059	-0.0963089	mannwhitneyu_two-sided	9	0.609524	FALSE	0.25	0.825806	FALSE
Agmatine	Agm	Liver	Control_ControlDiet	Proteinuric_ControlDiet	6	4	560.501	481.713	2.74858	2.68279	-0.0657882	mannwhitneyu_two-sided	10	0.761905	FALSE	0.25	0.930233	FALSE
Agmatine	Agm	Heart	Control_ControlDiet	Proteinuric_ControlDiet	6	4	690.432	576.807	2.83912	2.76103	-0.0780907	mannwhitneyu_two-sided	6	0.257143	FALSE	0.25	0.650602	FALSE
Agmatine	Agm	Muscle	Control_ControlDiet	Proteinuric_ControlDiet	6	4	2279.73	3018.73	3.35788	3.47982	0.121941	mannwhitneyu_two-sided	6	0.257143	FALSE	0.25	0.650602	FALSE
Agmatine	Agm	Brain	Control_ControlDiet	Proteinuric_ControlDiet	6	4	838.565	1073.86	2.92354	3.03095	0.107411	mannwhitneyu_two-sided	18	0.257143	FALSE	0.25	0.650602	FALSE
Agmatine	Agm	Lung	Control_ControlDiet	Proteinuric_ControlDiet	6	4	1752.56	2898.86	3.24367	3.46223	0.218554	mannwhitneyu_two-sided	22	0.0380952	TRUE	0.25	0.347826	FALSE
Agmatine	Agm	Spleen	Control_ControlDiet	Proteinuric_ControlDiet	6	4	505.677	492.584	2.70387	2.69248	-0.0113924	mannwhitneyu_two-sided	11	0.914286	FALSE	0.25	0.974619	FALSE
Agmatine	Agm	Duodenum	Control_ControlDiet	Proteinuric_ControlDiet	6	4	8082.19	7064.13	3.90753	3.84906	-0.0584708	mannwhitneyu_two-sided	10	0.761905	FALSE	0.25	0.930233	FALSE
Agmatine	Agm	Jejunum	Control_ControlDiet	Proteinuric_ControlDiet	6	4	3850.7	3974.06	3.58554	3.59923	0.0136952	mannwhitneyu_two-sided	11	0.914286	FALSE	0.25	0.974619	FALSE
Agmatine	Agm	Ileum	Control_ControlDiet	Proteinuric_ControlDiet	6	4	1940.88	2571.62	3.288	3.41021	0.122208	mannwhitneyu_two-sided	15	0.609524	FALSE	0.25	0.825806	FALSE
Agmatine	Agm	Colon	Control_ControlDiet	Proteinuric_ControlDiet	6	4	4960.05	3454.9	3.69549	3.53844	-0.15705	mannwhitneyu_two-sided	8	0.47619	FALSE	0.25	0.806452	FALSE
Agmatine	Agm	Erythrocytes	Control_ControlDiet	Proteinuric_ControlDiet	6	4	1619.19	1481.11	3.2093	3.17059	-0.0387099	mannwhitneyu_two-sided	13	0.914286	FALSE	0.25	0.974619	FALSE
Agmatine	Agm	Plasma	Control_ControlDiet	Proteinuric_ControlDiet	6	4	1424.79	2123.28	3.15375	3.32701	0.173256	mannwhitneyu_two-sided	21	0.0666667	FALSE	0.25	0.411765	FALSE
Agmatine	Agm	Urine	Control_ControlDiet	Proteinuric_ControlDiet	4	3	87014.6	30797.4	4.93959	4.48851	-0.451078	mannwhitneyu_two-sided	0	0.0571429	FALSE	0.25	0.411765	FALSE
Asymmetric dimethylarginine	ADMA	Kid. Cortex	Control_ControlDiet	Proteinuric_ControlDiet	6	4	1.53511e+06	1.36355e+06	6.18614	6.13467	-0.0514669	mannwhitneyu_two-sided	15	0.609524	FALSE	0.25	0.825806	FALSE
Asymmetric dimethylarginine	ADMA	Medulla	Control_ControlDiet	Proteinuric_ControlDiet	6	4	1.8019e+06	2.19628e+06	6.25573	6.34169	0.0859574	mannwhitneyu_two-sided	14	0.761905	FALSE	0.25	0.930233	FALSE
Asymmetric dimethylarginine	ADMA	Liver	Control_ControlDiet	Proteinuric_ControlDiet	6	4	724591	986885	5.86009	5.99427	0.134174	mannwhitneyu_two-sided	20	0.114286	FALSE	0.25	0.48	FALSE
Asymmetric dimethylarginine	ADMA	Heart	Control_ControlDiet	Proteinuric_ControlDiet	6	4	1.01609e+06	1.1319e+06	6.00693	6.05381	0.046879	mannwhitneyu_two-sided	15	0.609524	FALSE	0.25	0.825806	FALSE
Asymmetric dimethylarginine	ADMA	Muscle	Control_ControlDiet	Proteinuric_ControlDiet	6	4	680915	938291	5.83309	5.97234	0.139245	mannwhitneyu_two-sided	17	0.352381	FALSE	0.25	0.698113	FALSE
Asymmetric dimethylarginine	ADMA	Brain	Control_ControlDiet	Proteinuric_ControlDiet	6	4	192292	243722	5.28396	5.3869	0.102933	mannwhitneyu_two-sided	18	0.257143	FALSE	0.25	0.650602	FALSE
Asymmetric dimethylarginine	ADMA	Lung	Control_ControlDiet	Proteinuric_ControlDiet	6	4	830084	858022	5.91912	5.9335	0.0143764	mannwhitneyu_two-sided	12	1	FALSE	0.25	1	FALSE
Asymmetric dimethylarginine	ADMA	Spleen	Control_ControlDiet	Proteinuric_ControlDiet	6	4	1.12311e+06	1.22673e+06	6.05042	6.08875	0.0383264	mannwhitneyu_two-sided	17	0.352381	FALSE	0.25	0.698113	FALSE
Asymmetric dimethylarginine	ADMA	Duodenum	Control_ControlDiet	Proteinuric_ControlDiet	6	4	698857	806162	5.84439	5.90642	0.0620336	mannwhitneyu_two-sided	18	0.257143	FALSE	0.25	0.650602	FALSE
Asymmetric dimethylarginine	ADMA	Jejunum	Control_ControlDiet	Proteinuric_ControlDiet	6	4	719015	778569	5.85674	5.8913	0.0345593	mannwhitneyu_two-sided	15	0.609524	FALSE	0.25	0.825806	FALSE
Asymmetric dimethylarginine	ADMA	Ileum	Control_ControlDiet	Proteinuric_ControlDiet	6	4	491566	585032	5.69158	5.76718	0.075598	mannwhitneyu_two-sided	16	0.47619	FALSE	0.25	0.806452	FALSE
Asymmetric dimethylarginine	ADMA	Colon	Control_ControlDiet	Proteinuric_ControlDiet	6	4	470728	581736	5.67277	5.76473	0.0919561	mannwhitneyu_two-sided	17	0.352381	FALSE	0.25	0.698113	FALSE
Asymmetric dimethylarginine	ADMA	Erythrocytes	Control_ControlDiet	Proteinuric_ControlDiet	6	4	575126	731629	5.75976	5.86429	0.104528	mannwhitneyu_two-sided	20	0.114286	FALSE	0.25	0.48	FALSE
Asymmetric dimethylarginine	ADMA	Plasma	Control_ControlDiet	Proteinuric_ControlDiet	6	4	1.05048e+06	1.10929e+06	6.02139	6.04504	0.0236551	mannwhitneyu_two-sided	15	0.609524	FALSE	0.25	0.825806	FALSE
Asymmetric dimethylarginine	ADMA	Urine	Control_ControlDiet	Proteinuric_ControlDiet	4	3	1.62762e+07	1.07139e+07	7.21155	7.02995	-0.181608	mannwhitneyu_two-sided	0	0.0571429	FALSE	0.25	0.411765	FALSE
Monomethylarginine	MMA	Kid. Cortex	Control_ControlDiet	Proteinuric_ControlDiet	6	4	52966.4	35828.1	4.724	4.55422	-0.169777	mannwhitneyu_two-sided	6	0.257143	FALSE	0.25	0.650602	FALSE
Monomethylarginine	MMA	Medulla	Control_ControlDiet	Proteinuric_ControlDiet	6	4	55804.1	63103.1	4.74667	4.80005	0.0533846	mannwhitneyu_two-sided	11	0.914286	FALSE	0.25	0.974619	FALSE
Monomethylarginine	MMA	Liver	Control_ControlDiet	Proteinuric_ControlDiet	6	4	35970.6	43420.8	4.55595	4.6377	0.0817496	mannwhitneyu_two-sided	16	0.47619	FALSE	0.25	0.806452	FALSE
Monomethylarginine	MMA	Heart	Control_ControlDiet	Proteinuric_ControlDiet	6	4	60538.4	70307.1	4.78203	4.847	0.0649677	mannwhitneyu_two-sided	15	0.609524	FALSE	0.25	0.825806	FALSE
Monomethylarginine	MMA	Muscle	Control_ControlDiet	Proteinuric_ControlDiet	6	4	59088.4	93958.5	4.7715	4.97294	0.201434	mannwhitneyu_two-sided	21	0.0666667	FALSE	0.25	0.411765	FALSE
Monomethylarginine	MMA	Brain	Control_ControlDiet	Proteinuric_ControlDiet	6	4	14994.5	14425.5	4.17593	4.15913	-0.0168001	mannwhitneyu_two-sided	13	0.914286	FALSE	0.25	0.974619	FALSE
Monomethylarginine	MMA	Lung	Control_ControlDiet	Proteinuric_ControlDiet	6	4	31841.4	30318.5	4.50299	4.48171	-0.0212855	mannwhitneyu_two-sided	9	0.609524	FALSE	0.25	0.825806	FALSE
Monomethylarginine	MMA	Spleen	Control_ControlDiet	Proteinuric_ControlDiet	6	4	28488	28183.7	4.45466	4.45	-0.00466382	mannwhitneyu_two-sided	15	0.609524	FALSE	0.25	0.825806	FALSE
Monomethylarginine	MMA	Duodenum	Control_ControlDiet	Proteinuric_ControlDiet	6	4	21845.1	23495.9	4.33935	4.37099	0.0316375	mannwhitneyu_two-sided	12	1	FALSE	0.25	1	FALSE
Monomethylarginine	MMA	Jejunum	Control_ControlDiet	Proteinuric_ControlDiet	6	4	75339.6	42812.2	4.87702	4.63157	-0.245455	mannwhitneyu_two-sided	8	0.47619	FALSE	0.25	0.806452	FALSE
Monomethylarginine	MMA	Ileum	Control_ControlDiet	Proteinuric_ControlDiet	6	4	19490.5	23767.4	4.28982	4.37598	0.0861585	mannwhitneyu_two-sided	17	0.352381	FALSE	0.25	0.698113	FALSE
Monomethylarginine	MMA	Colon	Control_ControlDiet	Proteinuric_ControlDiet	6	4	23837.2	28325	4.37725	4.45217	0.0749147	mannwhitneyu_two-sided	15	0.609524	FALSE	0.25	0.825806	FALSE
Monomethylarginine	MMA	Erythrocytes	Control_ControlDiet	Proteinuric_ControlDiet	6	4	98770.2	104935	4.99463	5.02092	0.0262926	mannwhitneyu_two-sided	10	0.761905	FALSE	0.25	0.930233	FALSE
Monomethylarginine	MMA	Plasma	Control_ControlDiet	Proteinuric_ControlDiet	6	4	220591	253715	5.34359	5.40435	0.0607587	mannwhitneyu_two-sided	14	0.761905	FALSE	0.25	0.930233	FALSE
Monomethylarginine	MMA	Urine	Control_ControlDiet	Proteinuric_ControlDiet	4	3	51782.7	68343	4.71418	4.83469	0.120509	mannwhitneyu_two-sided	9	0.4	FALSE	0.25	0.756757	FALSE
Acetylarginine	AcArg	Kid. Cortex	Control_ControlDiet	Proteinuric_ControlDiet	6	4	13409.2	37691	4.1274	4.57624	0.448836	mannwhitneyu_two-sided	23	0.0190476	TRUE	0.25	0.285714	FALSE
Acetylarginine	AcArg	Medulla	Control_ControlDiet	Proteinuric_ControlDiet	6	4	11468.2	38969.7	4.05949	4.59073	0.531233	mannwhitneyu_two-sided	24	0.00952381	TRUE	0.25	0.285714	FALSE
Acetylarginine	AcArg	Liver	Control_ControlDiet	Proteinuric_ControlDiet	6	4	15213.5	17578.7	4.18223	4.24499	0.0627567	mannwhitneyu_two-sided	13	0.914286	FALSE	0.25	0.974619	FALSE
Acetylarginine	AcArg	Heart	Control_ControlDiet	Proteinuric_ControlDiet	6	4	1239.22	1306.46	3.09315	3.1161	0.0229467	mannwhitneyu_two-sided	15	0.609524	FALSE	0.25	0.825806	FALSE
Acetylarginine	AcArg	Muscle	Control_ControlDiet	Proteinuric_ControlDiet	6	4	2060.91	2898.61	3.31406	3.46219	0.14813	mannwhitneyu_two-sided	19	0.171429	FALSE	0.25	0.580645	FALSE
Acetylarginine	AcArg	Brain	Control_ControlDiet	Proteinuric_ControlDiet	6	4	22796	28672.2	4.35786	4.45746	0.0996018	mannwhitneyu_two-sided	17	0.352381	FALSE	0.25	0.698113	FALSE
Acetylarginine	AcArg	Lung	Control_ControlDiet	Proteinuric_ControlDiet	6	4	13860.6	13665.1	4.14178	4.13561	-0.00616857	mannwhitneyu_two-sided	11	0.914286	FALSE	0.25	0.974619	FALSE
Acetylarginine	AcArg	Spleen	Control_ControlDiet	Proteinuric_ControlDiet	6	4	27695.5	33359.2	4.44241	4.52322	0.0808071	mannwhitneyu_two-sided	22	0.0380952	TRUE	0.25	0.347826	FALSE
Acetylarginine	AcArg	Duodenum	Control_ControlDiet	Proteinuric_ControlDiet	6	4	85115.1	84824.4	4.93001	4.92852	-0.00148614	mannwhitneyu_two-sided	12	1	FALSE	0.25	1	FALSE
Acetylarginine	AcArg	Jejunum	Control_ControlDiet	Proteinuric_ControlDiet	6	4	44947.9	61172.4	4.65271	4.78656	0.133846	mannwhitneyu_two-sided	16	0.47619	FALSE	0.25	0.806452	FALSE
Acetylarginine	AcArg	Ileum	Control_ControlDiet	Proteinuric_ControlDiet	6	4	26941.3	32943.4	4.43042	4.51777	0.0873492	mannwhitneyu_two-sided	15	0.609524	FALSE	0.25	0.825806	FALSE
Acetylarginine	AcArg	Colon	Control_ControlDiet	Proteinuric_ControlDiet	6	4	7467.26	8820.57	3.87316	3.9455	0.072335	mannwhitneyu_two-sided	15	0.609524	FALSE	0.25	0.825806	FALSE
Acetylarginine	AcArg	Erythrocytes	Control_ControlDiet	Proteinuric_ControlDiet	6	4	12591.2	10706.2	4.10007	4.02963	-0.0704317	mannwhitneyu_two-sided	9	0.609524	FALSE	0.25	0.825806	FALSE
Acetylarginine	AcArg	Plasma	Control_ControlDiet	Proteinuric_ControlDiet	6	4	16252.9	23790.9	4.21093	4.37641	0.16548	mannwhitneyu_two-sided	22	0.0380952	TRUE	0.25	0.347826	FALSE
Acetylarginine	AcArg	Urine	Control_ControlDiet	Proteinuric_ControlDiet	4	3	822277	626376	5.91502	5.79684	-0.118183	mannwhitneyu_two-sided	3	0.4	FALSE	0.25	0.756757	FALSE
