# Supplementary material for: Diversion of Arginine’s dietary metabolic fate in proteinuric kidney disease
Source: Research Square preprint supplement (doi:10.21203/rs.3.rs-9927381/v1), 2026-06-17
Supplement: Supplementary file 14 [file 8898f51f7eba8b6d2bacbb30.xlsx]

## Sheet: Survival_summary
Group	Number_of_mice	Number_of_rows	Number_of_events	Number_censored	Median_survival_weeks	Survival_at_5_weeks	Survival_at_10_weeks	Survival_at_15_weeks	Survival_at_16_weeks
Asp/Asn_Proteinuric	13	13	5	8	inf	1	1	0.615385	0.615385
Asp/Asn_Control	9	9	0	9	inf	1	1	1	1
Normal_Proteinuric	13	13	2	11	inf	1	1	0.923077	0.846154
Normal_Control	7	7	0	7	inf	1	1	1	1

## Sheet: Global_logrank_test
Test	Groups_compared	Test_statistic	Pvalue
Global log-rank test	Asp/Asn_Proteinuric; Asp/Asn_Control; Normal_Proteinuric; Normal_Control	8.29385	0.0403134

## Sheet: Pairwise_logrank_tests
Group_1	Group_2	N_Group_1	N_Group_2	Events_Group_1	Events_Group_2	Logrank_test_statistic	Logrank_pvalue	BH_rank	BH_FDR_pvalue
Asp/Asn_Proteinuric	Asp/Asn_Control	13	9	5	0	4.1639	0.0412943	1	0.247766
Asp/Asn_Proteinuric	Normal_Control	13	7	5	0	3.25717	0.0711117	2	0.213335
Asp/Asn_Proteinuric	Normal_Proteinuric	13	13	5	2	2.06029	0.151182	3	0.302364
Asp/Asn_Control	Normal_Proteinuric	9	13	0	2	1.4419	0.229832	4	0.344748
Normal_Proteinuric	Normal_Control	13	7	2	0	1.12156	0.289582	5	0.347499
Asp/Asn_Control	Normal_Control	9	7	0	0	0	1	6	1
