# Supplementary material for: Diversion of Arginine’s dietary metabolic fate in proteinuric kidney disease
Source: Research Square preprint supplement (doi:10.21203/rs.3.rs-9927381/v1), 2026-06-17
Supplement: Supplementary file 15 [file 96510d577ef68cd3e9fdbc1c.xlsx]

## Sheet: Summary
Metabolite	Metabolite_abbrev	N_pairs	mean_log2_remission	mean_log2_active	mean_log2_diff	std_log2_diff	sem_log2_diff	pval_ttest
Arginine	Arg	10	22.9226	21.8774	1.04516	2.8951	0.91551	0.283077
Ornithine	Orn	10	20.2529	19.3089	0.944002	3.00557	0.950444	0.346553
Citrulline	Cit	10	18.8519	17.6182	1.23366	2.98283	0.943253	0.223334
Argininosuccinate	ArgSuc	10	7.6216	8.03445	-0.412855	2.24592	0.710221	0.575303
Glutamate	Glu	10	18.3756	17.3323	1.0433	3.01003	0.951854	0.301509
Glutamine	Gln	10	23.2058	21.291	1.91481	4.36306	1.37972	0.198585
Aspartate	Asp	10	14.4316	14.6722	-0.240641	0.307205	0.0971468	0.0351594
Proline	Pro	10	20.6587	18.9965	1.66221	3.71627	1.17519	0.190888
4-hydroxyproline	4OHPro	10	18.3385	15.9651	2.37334	4.62276	1.46185	0.138926
Agmatine	Agm	10	13.0646	12.956	0.108533	1.91759	0.606395	0.861917
Asymmetric dimethylarginine	ADMA	10	20.8274	19.7099	1.11749	3.22873	1.02101	0.302164
Monomethylarginine	MMA	10	16.2315	15.8246	0.406847	1.98189	0.626729	0.53245
Acetylarginine	AcArg	10	15.7338	14.4846	1.24926	3.57941	1.13191	0.298367

## Sheet: Patient_level
Metabolite	Metabolite_abbrev	Patient_ID	remission	active	log2_diff
Arginine	Arg	18694	23.0755	23.2452	-0.169714
Arginine	Arg	19834	22.7579	23.607	-0.849111
Arginine	Arg	20455	22.5874	16.1639	6.42353
Arginine	Arg	20579	22.8867	22.6937	0.193007
Arginine	Arg	22215	23.2119	22.7612	0.450662
Arginine	Arg	29261	23.1633	23.5744	-0.411117
Arginine	Arg	29720	22.9594	16.4355	6.52392
Arginine	Arg	30357	22.8222	23.8757	-1.0535
Arginine	Arg	31598	22.8219	22.9911	-0.169173
Arginine	Arg	32418	22.9393	23.4262	-0.48689
Ornithine	Orn	18694	19.8109	20.2282	-0.417288
Ornithine	Orn	19834	20.0686	21.0918	-1.02321
Ornithine	Orn	20455	19.7141	13.717	5.9971
Ornithine	Orn	20579	20.377	19.9841	0.392906
Ornithine	Orn	22215	21.2617	20.563	0.698631
Ornithine	Orn	29261	20.6836	21.0991	-0.415511
Ornithine	Orn	29720	20.1952	13.2419	6.9533
Ornithine	Orn	30357	19.5605	21.376	-1.81552
Ornithine	Orn	31598	20.1768	20.3835	-0.206721
Ornithine	Orn	32418	20.681	21.4046	-0.723664
Citrulline	Cit	18694	19.1352	19.0082	0.126966
Citrulline	Cit	19834	18.8625	19.0777	-0.215189
Citrulline	Cit	20455	19.2009	11.6743	7.52659
Citrulline	Cit	20579	17.8717	17.5483	0.323419
Citrulline	Cit	22215	20.1004	19.3725	0.727855
Citrulline	Cit	29261	18.4786	18.6057	-0.127125
Citrulline	Cit	29720	18.2928	12.4047	5.8881
Citrulline	Cit	30357	18.5256	20.3242	-1.79863
Citrulline	Cit	31598	19.1402	19.2987	-0.158478
Citrulline	Cit	32418	18.9107	18.8676	0.0430494
Argininosuccinate	ArgSuc	18694	6.88196	11.015	-4.13303
Argininosuccinate	ArgSuc	19834	6.98776	8.44943	-1.46167
Argininosuccinate	ArgSuc	20455	7.01473	4.33821	2.67652
Argininosuccinate	ArgSuc	20579	7.9038	6.95288	0.950921
Argininosuccinate	ArgSuc	22215	8.76113	9.37569	-0.614562
Argininosuccinate	ArgSuc	29261	7.6352	7.98285	-0.347651
Argininosuccinate	ArgSuc	29720	5.95776	4.24441	1.71336
Argininosuccinate	ArgSuc	30357	7.03023	9.73576	-2.70553
Argininosuccinate	ArgSuc	31598	11.129	9.10649	2.02256
Argininosuccinate	ArgSuc	32418	6.91436	9.14382	-2.22947
Glutamate	Glu	18694	18.4941	18.2842	0.209986
Glutamate	Glu	19834	18.1405	19.0427	-0.902209
Glutamate	Glu	20455	18.0245	11.464	6.56041
Glutamate	Glu	20579	18.4945	18.3014	0.193125
Glutamate	Glu	22215	19.1796	18.7663	0.41332
Glutamate	Glu	29261	18.4775	18.5723	-0.0948012
Glutamate	Glu	29720	18.455	11.6884	6.76659
Glutamate	Glu	30357	18.1986	19.0598	-0.861136
Glutamate	Glu	31598	18.0712	18.8115	-0.740221
Glutamate	Glu	32418	18.2202	19.3323	-1.11206
Glutamine	Gln	18694	23.2163	23.3011	-0.0848264
Glutamine	Gln	19834	23.1027	23.724	-0.621298
Glutamine	Gln	20455	22.7444	12.5617	10.1827
Glutamine	Gln	20579	23.5054	22.9856	0.519816
Glutamine	Gln	22215	23.6067	23.0327	0.573951
Glutamine	Gln	29261	23.2967	23.56	-0.263279
Glutamine	Gln	29720	23.0615	12.938	10.1235
Glutamine	Gln	30357	23.0152	23.7626	-0.747404
Glutamine	Gln	31598	23.1807	23.2824	-0.101705
Glutamine	Gln	32418	23.3282	23.7615	-0.433367
Aspartate	Asp	18694	14.0315	14.7024	-0.670915
Aspartate	Asp	19834	14.4613	14.8869	-0.425602
Aspartate	Asp	20455	13.6875	14.3021	-0.614573
Aspartate	Asp	20579	14.5651	14.5224	0.0426836
Aspartate	Asp	22215	14.6993	14.6611	0.0382332
Aspartate	Asp	29261	14.4244	14.7347	-0.310247
Aspartate	Asp	29720	14.6197	14.3259	0.293738
Aspartate	Asp	30357	14.4558	14.727	-0.271138
Aspartate	Asp	31598	14.5819	14.6833	-0.10147
Proline	Asp	32418	14.7894	15.1765	-0.387116
Proline	Pro	18694	20.6164	20.3999	0.216489
Proline	Pro	19834	20.7496	21.0539	-0.304304
Proline	Pro	20455	20.1218	12.001	8.12075
Proline	Pro	20579	20.2835	20.4653	-0.181785
Proline	Pro	22215	21.3351	21.1358	0.199325
Proline	Pro	29261	20.7853	20.702	0.0832691
Proline	Pro	29720	20.6544	11.4063	9.24808
Proline	Pro	30357	20.5948	20.916	-0.321263
Proline	Pro	31598	21.0991	21.1895	-0.0903674
Proline	Pro	32418	20.3469	20.695	-0.348102
4-hydroxyproline	4OHPro	18694	17.5013	18.1059	-0.604525
4-hydroxyproline	4OHPro	19834	19.4242	19.077	0.347189
4-hydroxyproline	4OHPro	20455	17.4168	6.403	11.0138
4-hydroxyproline	4OHPro	20579	17.9354	17.1525	0.782953
4-hydroxyproline	4OHPro	22215	19.5761	17.6194	1.95669
4-hydroxyproline	4OHPro	29261	18.5203	18.5243	-0.00402611
4-hydroxyproline	4OHPro	29720	17.8887	6.8886	11.0001
4-hydroxyproline	4OHPro	30357	19.0946	19.6315	-0.536826
4-hydroxyproline	4OHPro	31598	18.4634	17.8295	0.633933
4-hydroxyproline	4OHPro	32418	17.5639	18.4199	-0.855956
Agmatine	Agm	18694	12.3299	15.5613	-3.23139
Agmatine	Agm	19834	12.1518	12.6774	-0.525634
Agmatine	Agm	20455	12.8073	12.0598	0.747518
Agmatine	Agm	20579	13.8021	12.0928	1.70927
Agmatine	Agm	22215	13.913	15.1172	-1.2042
Agmatine	Agm	29261	12.5289	12.7577	-0.22878
Agmatine	Agm	29720	11.732	11.6028	0.129192
Agmatine	Agm	30357	12.2165	12.3899	-0.173442
Agmatine	Agm	31598	17.2095	13.0416	4.16789
Agmatine	Agm	32418	11.9548	12.2599	-0.305089
Asymmetric dimethylarginine	ADMA	18694	20.8966	21.114	-0.21743
Asymmetric dimethylarginine	ADMA	19834	21.0357	21.4579	-0.422255
Asymmetric dimethylarginine	ADMA	20455	20.2901	13.1881	7.102
Asymmetric dimethylarginine	ADMA	20579	20.7197	20.4387	0.281001
Asymmetric dimethylarginine	ADMA	22215	21.4573	21.0681	0.389122
Asymmetric dimethylarginine	ADMA	29261	20.7433	21.1149	-0.371568
Asymmetric dimethylarginine	ADMA	29720	20.3994	13.1932	7.20621
Asymmetric dimethylarginine	ADMA	30357	20.6742	21.9917	-1.31754
Asymmetric dimethylarginine	ADMA	31598	21.2504	21.4753	-0.224915
Asymmetric dimethylarginine	ADMA	32418	20.8073	22.057	-1.2497
Monomethylarginine	MMA	18694	15.3897	17.5786	-2.18889
Monomethylarginine	MMA	19834	15.7531	16.7284	-0.97535
Monomethylarginine	MMA	20455	14.9271	11.9174	3.00974
Monomethylarginine	MMA	20579	16.4812	15.92	0.561149
Monomethylarginine	MMA	22215	17.0334	17.2956	-0.262231
Monomethylarginine	MMA	29261	16.3729	16.5831	-0.210275
Monomethylarginine	MMA	29720	15.7538	11.8836	3.87014
Monomethylarginine	MMA	30357	15.926	17.1381	-1.21206
Monomethylarginine	MMA	31598	18.7185	16.5242	2.19426
Monomethylarginine	MMA	32418	15.9589	16.6769	-0.718003
Acetylarginine	AcArg	18694	15.3736	15.9826	-0.608981
Acetylarginine	AcArg	19834	16.3144	16.8299	-0.51551
Acetylarginine	AcArg	20455	16.7961	8.48172	8.31435
Acetylarginine	AcArg	20579	14.712	14.6887	0.0232848
Acetylarginine	AcArg	22215	16.3324	15.8546	0.477778
Acetylarginine	AcArg	29261	15.8815	16.2686	-0.387095
Acetylarginine	AcArg	29720	15.2627	7.83158	7.43115
Acetylarginine	AcArg	30357	15.3546	17.6728	-2.31813
Acetylarginine	AcArg	31598	16.1645	15.8316	0.332829
Acetylarginine	AcArg	32418	15.1465	15.4035	-0.257055
