# Supplementary material for: Diversion of Arginine’s dietary metabolic fate in proteinuric kidney disease
Source: Research Square preprint supplement (doi:10.21203/rs.3.rs-9927381/v1), 2026-06-17
Supplement: Supplementary file 16 [file 97f5b0052704668081f68625.xlsx]

## Sheet: Arg10_Pro6
Genes	Tissue	Labeling	Comparison	log2FC_Proteinuric_vs_Control	Pvalue	Significant_P_lt_0_05
Col1a1	Kid. Cortex	Arg10	Ch1	4.06932	1.68533e-08	TRUE
Col1a1	Kid. Cortex	Pro6	Ch2	6.71686	4.66608e-11	TRUE
Col1a2	Kid. Cortex	Arg10	Ch1	4.81983	1.14102e-10	TRUE
Col1a2	Kid. Cortex	Pro6	Ch2	1.37175	3.00071e-25	TRUE
Col4a1	Kid. Cortex	Arg10	Ch1	0.115796	0.00509065	TRUE
Col5a1	Kid. Cortex	Arg10	Ch1	14.8187	1.24639e-13	TRUE
Col5a1	Kid. Cortex	Pro6	Ch2	1.69766	8.54597e-08	TRUE
Col6a1	Kid. Cortex	Arg10	Ch1	1.56175	2.41815e-10	TRUE
Col6a1	Kid. Cortex	Pro6	Ch2	1.28146	8.58616e-12	TRUE
Col6a2	Kid. Cortex	Arg10	Ch1	0.604061	4.49577e-11	TRUE
Col6a3	Kid. Cortex	Arg10	Ch1	2.28822	2.98758e-14	TRUE
Col6a3	Kid. Cortex	Pro6	Ch2	1.22533	2.46243e-10	TRUE
Col12a1	Kid. Cortex	Arg10	Ch1	3.35606	2.37976e-08	TRUE
Col12a1	Kid. Cortex	Pro6	Ch2	3.22929	4.04943e-09	TRUE
Col14a1	Kid. Cortex	Arg10	Ch1	1.63083	5.94056e-05	TRUE
Col14a1	Kid. Cortex	Pro6	Ch2	0.91804	2.15512e-05	TRUE
Col15a1	Kid. Cortex	Arg10	Ch1	0.867196	0.00223014	TRUE
Col15a1	Kid. Cortex	Pro6	Ch2	-0.0086956	0.0849145	FALSE
Col18a1	Kid. Cortex	Arg10	Ch1	1.27817	0.00835279	TRUE
Col18a1	Kid. Cortex	Pro6	Ch2	0.664214	1.28655e-13	TRUE
Col1a1	Kid. Medulla	Arg10	Ch1	2.21975	8.90605e-23	TRUE
Col1a2	Kid. Medulla	Arg10	Ch1	2.43544	5.31689e-14	TRUE
Col1a2	Kid. Medulla	Pro6	Ch2	3.10135	1.75314e-22	TRUE
Col4a1	Kid. Medulla	Arg10	Ch1	-0.587042	1.79306e-06	TRUE
Col5a1	Kid. Medulla	Arg10	Ch1	3.36616	2.97939e-13	TRUE
Col5a1	Kid. Medulla	Pro6	Ch2	5.43398	2.4612e-11	TRUE
Col6a1	Kid. Medulla	Arg10	Ch1	0.916099	2.98961e-12	TRUE
Col6a1	Kid. Medulla	Pro6	Ch2	1.44414	3.24674e-13	TRUE
Col6a2	Kid. Medulla	Arg10	Ch1	1.23808	1.40867e-10	TRUE
Col6a2	Kid. Medulla	Pro6	Ch2	0.646622	5.13738e-06	TRUE
Col6a3	Kid. Medulla	Arg10	Ch1	1.3303	1.58658e-12	TRUE
Col6a3	Kid. Medulla	Pro6	Ch2	1.22301	1.36378e-11	TRUE
Col12a1	Kid. Medulla	Arg10	Ch1	1.96158	2.47914e-06	TRUE
Col12a1	Kid. Medulla	Pro6	Ch2	1.31498	4.61469e-10	TRUE
Col14a1	Kid. Medulla	Arg10	Ch1	1.51454	0.00135508	TRUE
Col14a1	Kid. Medulla	Pro6	Ch2	1.5161	9.06457e-05	TRUE
Col15a1	Kid. Medulla	Arg10	Ch1	1.17506	0.57927	FALSE
Col15a1	Kid. Medulla	Pro6	Ch2	0.768705	6.84645e-09	TRUE
Col18a1	Kid. Medulla	Arg10	Ch1	1.06885	1.21824e-06	TRUE
Col18a1	Kid. Medulla	Pro6	Ch2	1.2546	9.77932e-25	TRUE

## Sheet: Arg7_Pro6
Genes	Tissue	Labeling	Comparison	log2FC_Proteinuric_vs_Control	Pvalue	Significant_P_lt_0_05
Col1a1	Kid. Cortex	Arg7	Ch1	4.57558	1.59439e-10	TRUE
Col1a1	Kid. Cortex	Pro6	Ch2	5.09873	2.52991e-14	TRUE
Col1a2	Kid. Cortex	Arg7	Ch1	7.17292	1.68027e-13	TRUE
Col4a1	Kid. Cortex	Arg7	Ch1	0.482352	0.000471711	TRUE
Col5a1	Kid. Cortex	Arg7	Ch1	1.5565	4.04678e-08	TRUE
Col6a1	Kid. Cortex	Arg7	Ch1	1.2165	4.16094e-09	TRUE
Col6a1	Kid. Cortex	Pro6	Ch2	1.35547	7.06687e-11	TRUE
Col6a2	Kid. Cortex	Arg7	Ch1	1.52324	8.99825e-14	TRUE
Col6a3	Kid. Cortex	Arg7	Ch1	2.15915	3.50579e-08	TRUE
Col6a3	Kid. Cortex	Pro6	Ch2	1.52693	5.79461e-11	TRUE
Col12a1	Kid. Cortex	Arg7	Ch1	2.87269	1.79649e-07	TRUE
Col12a1	Kid. Cortex	Pro6	Ch2	3.92147	1.83927e-09	TRUE
Col14a1	Kid. Cortex	Arg7	Ch1	1.5595	0.00286704	TRUE
Col14a1	Kid. Cortex	Pro6	Ch2	0.984737	1.25946e-15	TRUE
Col15a1	Kid. Cortex	Arg7	Ch1	1.01893	0.00285445	TRUE
Col15a1	Kid. Cortex	Pro6	Ch2	0.321215	1.64945e-10	TRUE
Col18a1	Kid. Cortex	Arg7	Ch1	1.16023	1.06346e-10	TRUE
Col18a1	Kid. Cortex	Pro6	Ch2	1.20028	0.0155822	TRUE
Col1a1	Kid. Medulla	Arg7	Ch1	1.75563	2.37464e-14	TRUE
Col1a2	Kid. Medulla	Arg7	Ch1	2.98983	1.30505e-22	TRUE
Col4a1	Kid. Medulla	Arg7	Ch1	-0.853787	2.36703e-14	TRUE
Col5a1	Kid. Medulla	Arg7	Ch1	1.70584	9.72697e-05	TRUE
Col6a1	Kid. Medulla	Arg7	Ch1	1.6087	8.07974e-13	TRUE
Col6a1	Kid. Medulla	Pro6	Ch2	1.68354	4.16432e-17	TRUE
Col6a2	Kid. Medulla	Arg7	Ch1	1.59589	1.33726e-12	TRUE
Col6a3	Kid. Medulla	Arg7	Ch1	1.65258	1.13786e-12	TRUE
Col6a3	Kid. Medulla	Pro6	Ch2	1.60998	3.51611e-11	TRUE
Col12a1	Kid. Medulla	Arg7	Ch1	1.71625	6.85885e-08	TRUE
Col12a1	Kid. Medulla	Pro6	Ch2	1.24624	1.93119e-15	TRUE
Col14a1	Kid. Medulla	Arg7	Ch1	1.52851	0.00105878	TRUE
Col14a1	Kid. Medulla	Pro6	Ch2	2.00967	1.37471e-05	TRUE
Col15a1	Kid. Medulla	Arg7	Ch1	1.66343	3.78238e-06	TRUE
Col15a1	Kid. Medulla	Pro6	Ch2	0.894565	1.2099e-05	TRUE
Col18a1	Kid. Medulla	Arg7	Ch1	1.40556	2.97382e-07	TRUE
Col18a1	Kid. Medulla	Pro6	Ch2	1.16333	5.87179e-17	TRUE
