# Supplementary material for: Diversion of Arginine’s dietary metabolic fate in proteinuric kidney disease
Source: Research Square preprint supplement (doi:10.21203/rs.3.rs-9927381/v1), 2026-06-17
Supplement: Supplementary file 17 [file 9d407369cc908cbb4abdc0ce.xlsx]

## Sheet: Tubules
Metabolite	Metabolite_abbrev	mass_difference	Isotope_label	Metabolite_mass_diff	Time_min	Mean_log2_Ratio_Proteinuric	Mean_log2_Ratio_Control	Delta_log2_Ratio	Mean_log10_Area	P_value	N_Proteinuric	N_Control
Acetylarginine	AcArg	m + 6	13C6	AcArg (m + 6)	15	-5.75475	-5.16683	-0.58792	0.979425	0.802587	12	36
Acetylarginine	AcArg	m + 6	13C6	AcArg (m + 6)	30	-4.549	-5.16683	0.617832	1.18402	0.202731	12	36
Acetylarginine	AcArg	m + 6	13C6	AcArg (m + 6)	60	-5.15366	-5.16683	0.0131663	1.05276	0.802587	12	36
Asymmetric dimethylarginine	ADMA	m + 6	13C6	ADMA (m + 6)	15	-11.5734	-11.7145	0.141187	0.71268	0.453255	12	36
Asymmetric dimethylarginine	ADMA	m + 6	13C6	ADMA (m + 6)	30	-10.8687	-11.7145	0.845818	0.963012	0.118872	12	36
Asymmetric dimethylarginine	ADMA	m + 6	13C6	ADMA (m + 6)	60	-9.31484	-11.7145	2.3997	1.34016	3.25626e-05	12	36
Monomethylarginine	MMA	m + 6	13C6	MMA (m + 6)	15	-7.70642	-8.75217	1.04575	1.19665	0.0650029	12	36
Monomethylarginine	MMA	m + 6	13C6	MMA (m + 6)	30	-7.43015	-8.75217	1.32203	1.27363	0.0229774	12	36
Monomethylarginine	MMA	m + 6	13C6	MMA (m + 6)	60	-7.55823	-8.75217	1.19394	1.2381	0.0583769	12	36
Agmatine	Agm	m + 5	13C5	Agm (m + 5)	15	-5.31252	-5.10588	-0.206644	1.55907	0.346973	12	36
Agmatine	Agm	m + 5	13C5	Agm (m + 5)	30	-5.20147	-5.10588	-0.0955952	1.68537	1	12	36
Agmatine	Agm	m + 5	13C5	Agm (m + 5)	60	-3.92363	-5.10588	1.18225	2.01435	0.334903	12	36
Guanidinoacetate	GAA	m + 1	13C1	GAA (m + 1)	15	1.37661	1.78402	-0.407408	3.87251	0.0276384	12	36
Guanidinoacetate	GAA	m + 1	13C1	GAA (m + 1)	30	1.79112	1.78402	0.0071036	4.14327	0.839619	12	36
Guanidinoacetate	GAA	m + 1	13C1	GAA (m + 1)	60	2.35699	1.78402	0.572971	4.18699	0.00188905	12	36
Aspartate	Asp	m + 4	13C4	Asp (m + 4)	15	-7.65149	-7.82786	0.176373	1.13818	0.497409	12	36
Aspartate	Asp	m + 4	13C4	Asp (m + 4)	30	-7.12024	-7.82786	0.707625	1.47839	0.017834	12	36
Aspartate	Asp	m + 4	13C4	Asp (m + 4)	60	-6.91553	-7.82786	0.912336	1.48886	0.00280722	12	36
Glutamine	Gln	m + 5	13C5	Gln (m + 5)	15	-8.30746	-8.24377	-0.0636867	2.51444	0.543756	12	36
Glutamine	Gln	m + 5	13C5	Gln (m + 5)	30	-8.24066	-8.24377	0.00311762	2.66117	0.802587	12	36
Glutamine	Gln	m + 5	13C5	Gln (m + 5)	60	-7.79843	-8.24377	0.445339	2.72789	0.088684	12	36
Glutamate	Glu	m + 5	13C5	Glu (m + 5)	15	-7.70869	-7.73515	0.0264586	2.95613	0.592156	12	36
Glutamate	Glu	m + 5	13C5	Glu (m + 5)	30	-7.09967	-7.73515	0.635477	3.1865	0.000975083	12	36
Glutamate	Glu	m + 5	13C5	Glu (m + 5)	60	-6.68038	-7.73515	1.05477	3.23441	1.39125e-05	12	36
Proline	Pro	m + 5	13C5	Pro (m + 5)	15	-5.71057	-5.56497	-0.145602	2.0105	0.289361	12	36
Proline	Pro	m + 5	13C5	Pro (m + 5)	30	-5.20121	-5.56497	0.363762	2.27136	0.497409	12	36
Proline	Pro	m + 5	13C5	Pro (m + 5)	60	-4.64189	-5.56497	0.923083	2.38634	0.00136297	12	36
Citrulline	Cit	m + 6	13C6	Cit (m + 6)	15	-4.94297	-5.5844	0.641432	1.83166	0.248188	12	36
Citrulline	Cit	m + 6	13C6	Cit (m + 6)	30	-5.49988	-5.5844	0.0845223	1.77628	0.97151	12	36
Citrulline	Cit	m + 6	13C6	Cit (m + 6)	60	-5.18983	-5.5844	0.394566	1.96363	0.467722	12	36
Urea	Urea	m + 1	13C1	Urea (m + 1)	15	-5.3287	-5.4018	0.0730989	3.35623	0.453255	12	36
Urea	Urea	m + 1	13C1	Urea (m + 1)	30	-5.2905	-5.4018	0.1113	3.63161	0.248188	12	36
Urea	Urea	m + 1	13C1	Urea (m + 1)	60	-5.07485	-5.4018	0.32695	3.72552	0.0104816	12	36
Ornithine	Orn	m + 5	13C5	Orn (m + 5)	15	-2.85445	-2.9133	0.0588577	3.28416	0.877009	12	36
Ornithine	Orn	m + 5	13C5	Orn (m + 5)	30	-2.38979	-2.9133	0.523511	3.56117	0.238569	12	36
Ornithine	Orn	m + 5	13C5	Orn (m + 5)	60	-2.34125	-2.9133	0.572051	3.55951	0.163663	12	36
Arginine	Arg	m + 6	13C6	Arg (m + 6)	15	0.853111	1.20258	-0.349473	5.10328	0.136726	12	36
Arginine	Arg	m + 6	13C6	Arg (m + 6)	30	1.18845	1.20258	-0.014131	5.39652	0.933586	12	36
Arginine	Arg	m + 6	13C6	Arg (m + 6)	60	1.68792	1.20258	0.485334	5.5493	0.0760947	12	36

## Sheet: Glomeruli
Metabolite	Metabolite_abbrev	mass_difference	Isotope_label	Metabolite_mass_diff	Time_min	Mean_log2_Ratio_Proteinuric	Mean_log2_Ratio_Control	Delta_log2_Ratio	Mean_log10_Area	P_value	N_Proteinuric	N_Control
Acetylarginine	AcArg	m + 6	13C6	AcArg (m + 6)	15	-4.61774	-3.76123	-0.856501	1.10233	0.15658	12	36
Acetylarginine	AcArg	m + 6	13C6	AcArg (m + 6)	30	-4.46888	-3.76123	-0.70765	1.08029	0.676922	12	36
Acetylarginine	AcArg	m + 6	13C6	AcArg (m + 6)	60	-4.28326	-3.76123	-0.522024	1.05093	0.258075	12	36
Asymmetric dimethylarginine	ADMA	m + 6	13C6	ADMA (m + 6)	15	-11.5925	-10.2517	-1.34075	0.724381	0.0394441	12	36
Asymmetric dimethylarginine	ADMA	m + 6	13C6	ADMA (m + 6)	30	-10.6679	-10.2517	-0.416215	0.810349	0.194418	12	36
Asymmetric dimethylarginine	ADMA	m + 6	13C6	ADMA (m + 6)	60	-10.5153	-10.2517	-0.263577	0.982689	0.729915	12	36
Monomethylarginine	MMA	m + 6	13C6	MMA (m + 6)	15	-8.68853	-8.66012	-0.0284122	1.04222	0.642443	12	36
Monomethylarginine	MMA	m + 6	13C6	MMA (m + 6)	30	-8.68694	-8.66012	-0.0268188	1.06158	0.625482	12	36
Monomethylarginine	MMA	m + 6	13C6	MMA (m + 6)	60	-8.59945	-8.66012	0.0606714	1.08664	0.784231	12	36
Agmatine	Agm	m + 5	13C5	Agm (m + 5)	15	-6.44221	-5.45836	-0.983857	1.49702	0.0156634	12	36
Agmatine	Agm	m + 5	13C5	Agm (m + 5)	30	-6.5757	-5.45836	-1.11734	1.48016	0.000282377	12	36
Agmatine	Agm	m + 5	13C5	Agm (m + 5)	60	-5.67177	-5.45836	-0.213413	1.71002	0.747886	12	36
Guanidinoacetate	GAA	m + 1	13C1	GAA (m + 1)	15	-1.23113	-0.66456	-0.566574	1.83771	0.0616162	12	36
Guanidinoacetate	GAA	m + 1	13C1	GAA (m + 1)	30	-0.845663	-0.66456	-0.181102	1.91784	0.512621	12	36
Guanidinoacetate	GAA	m + 1	13C1	GAA (m + 1)	60	-0.157796	-0.66456	0.506764	2.0316	0.088684	12	36
Aspartate	Asp	m + 4	13C4	Asp (m + 4)	15	-7.54259	-7.3171	-0.225493	0.89665	0.163663	12	36
Aspartate	Asp	m + 4	13C4	Asp (m + 4)	30	-7.80161	-7.3171	-0.484518	0.848472	0.0085146	12	36
Aspartate	Asp	m + 4	13C4	Asp (m + 4)	60	-7.19536	-7.3171	0.121733	1.09449	0.625482	12	36
Glutamine	Gln	m + 5	13C5	Gln (m + 5)	15	-9.04046	-9.17419	0.133732	1.83657	0.659592	12	36
Glutamine	Gln	m + 5	13C5	Gln (m + 5)	30	-9.31592	-9.17419	-0.141728	1.89771	0.729915	12	36
Glutamine	Gln	m + 5	13C5	Gln (m + 5)	60	-9.12379	-9.17419	0.0503983	1.85758	0.425092	12	36
Glutamate	Glu	m + 5	13C5	Glu (m + 5)	15	-9.03537	-8.33658	-0.698783	2.23395	0.00259614	12	36
Glutamate	Glu	m + 5	13C5	Glu (m + 5)	30	-8.03971	-8.33658	0.296869	2.51614	0.27866	12	36
Glutamate	Glu	m + 5	13C5	Glu (m + 5)	60	-7.63552	-8.33658	0.701065	2.63628	0.00221689	12	36
Proline	Pro	m + 5	13C5	Pro (m + 5)	15	-8.00839	-7.3419	-0.666487	1.3666	0.00688448	12	36
Proline	Pro	m + 5	13C5	Pro (m + 5)	30	-7.12727	-7.3419	0.214625	1.57877	0.694425	12	36
Proline	Pro	m + 5	13C5	Pro (m + 5)	60	-6.38741	-7.3419	0.954486	1.81682	0.0041171	12	36
Citrulline	Cit	m + 6	13C6	Cit (m + 6)	15	-5.50875	-5.03708	-0.471671	1.9793	0.497409	12	36
Citrulline	Cit	m + 6	13C6	Cit (m + 6)	30	-5.6365	-5.03708	-0.599418	1.72462	0.113346	12	36
Citrulline	Cit	m + 6	13C6	Cit (m + 6)	60	-6.08461	-5.03708	-1.04753	1.76298	0.0552803	12	36
Urea	Urea	m + 1	13C1	Urea (m + 1)	15	-5.17213	-4.94945	-0.222675	3.25927	0.0843132	12	36
Urea	Urea	m + 1	13C1	Urea (m + 1)	30	-4.93685	-4.94945	0.0126041	3.2765	0.990502	12	36
Urea	Urea	m + 1	13C1	Urea (m + 1)	60	-4.99261	-4.94945	-0.0431551	3.44701	0.676922	12	36
Ornithine	Orn	m + 5	13C5	Orn (m + 5)	15	-3.11	-2.42724	-0.68276	2.90117	0.0801183	12	36
Ornithine	Orn	m + 5	13C5	Orn (m + 5)	30	-2.59186	-2.42724	-0.164614	2.97604	0.676922	12	36
Ornithine	Orn	m + 5	13C5	Orn (m + 5)	60	-2.70123	-2.42724	-0.273988	3.06655	0.453255	12	36
Arginine	Arg	m + 6	13C6	Arg (m + 6)	15	1.53099	2.08288	-0.551892	5.41519	0.0330931	12	36
Arginine	Arg	m + 6	13C6	Arg (m + 6)	30	2.35486	2.08288	0.271971	5.31317	0.323106	12	36
Arginine	Arg	m + 6	13C6	Arg (m + 6)	60	2.62347	2.08288	0.540582	5.53888	0.0552803	12	36
