# Supplementary material for: Diversion of Arginine’s dietary metabolic fate in proteinuric kidney disease
Source: Research Square preprint supplement (doi:10.21203/rs.3.rs-9927381/v1), 2026-06-17
Supplement: Supplementary file 18 [file b090682b4fdf6710591ef881.xlsx]

## Sheet: Indophenol (m)
Organ	IsotopeLabelType	Control_condition	Proteinuric_condition	N_Control	N_Proteinuric	Mean_Control	Mean_Proteinuric	Mean_difference_Proteinuric_minus_Control	SD_Control	SD_Proteinuric	SEM_Control	SEM_Proteinuric	Student_ttest_raw_p_value
Kid. Cortex	0	Control_ND	Proteinuric_ND	5	3	4.34889	4.43676	0.0878676	0.0369421	0.0548715	0.016521	0.0316801	0.0332668
Kid. Medulla	0	Control_ND	Proteinuric_ND	4	3	4.38475	4.5014	0.116655	0.0311104	0.017645	0.0155552	0.0101873	0.00222914
Liver	0	Control_ND	Proteinuric_ND	5	4	4.2902	4.29064	0.000446703	0.120402	0.0570216	0.0538454	0.0285108	0.994788
Heart	0	Control_ND	Proteinuric_ND	6	4	4.4177	4.47513	0.0574264	0.0499847	0.0624694	0.0204062	0.0312347	0.144421
Muscle	0	Control_ND	Proteinuric_ND	6	4	4.5345	4.52706	-0.00744455	0.0447517	0.0326723	0.0182698	0.0163361	0.783806
Brain	0	Control_ND	Proteinuric_ND	6	4	4.11674	4.20556	0.0888274	0.0793892	0.0385295	0.0324105	0.0192647	0.0742394
Lung	0	Control_ND	Proteinuric_ND	6	3	4.07174	4.07577	0.00402259	0.0657892	0.0597799	0.0268583	0.0345139	0.931799
Spleen	0	Control_ND	Proteinuric_ND	6	4	4.37513	4.37897	0.0038383	0.0506707	0.0518303	0.0206862	0.0259152	0.910246
Duodenum	0	Control_ND	Proteinuric_ND	6	3	4.94303	4.93095	-0.0120782	0.0177458	0.0187172	0.0072447	0.0108064	0.374964
Jejenum	0	Control_ND	Proteinuric_ND	5	3	4.31134	4.28336	-0.0279863	0.0259929	0.0403428	0.0116244	0.0232919	0.269599
Ileum	0	Control_ND	Proteinuric_ND	6	4	4.31263	4.31469	0.00206518	0.0396652	0.0690771	0.0161932	0.0345385	0.953041
Colon	0	Control_ND	Proteinuric_ND	6	4	4.96816	4.95567	-0.0124926	0.068222	0.0708622	0.0278515	0.0354311	0.786893
Erythrocytes	0	Control_ND	Proteinuric_ND	5	4	4.71672	4.70211	-0.0146096	0.0720538	0.0377048	0.0322234	0.0188524	0.726466
Plasma	0	Control_ND	Proteinuric_ND	5	4	4.91482	4.87268	-0.0421392	0.219967	0.227494	0.0983724	0.113747	0.786533

## Sheet: Indophenol (m+1)
Organ	IsotopeLabelType	Control_condition	Proteinuric_condition	N_Control	N_Proteinuric	Mean_Control	Mean_Proteinuric	Mean_difference_Proteinuric_minus_Control	SD_Control	SD_Proteinuric	SEM_Control	SEM_Proteinuric	Student_ttest_raw_p_value
Kid. Cortex	1	Control_AD	Proteinuric_AD	4	5	3.74796	3.81256	0.0646003	0.0054191	0.019059	0.00270955	0.00852344	0.000337199
Kid. Medulla	1	Control_AD	Proteinuric_AD	6	5	3.76499	3.82853	0.0635489	0.0274394	0.0530091	0.0112021	0.0237064	0.0301729
Liver	1	Control_AD	Proteinuric_AD	6	5	3.56408	3.6656	0.101526	0.0430903	0.0596184	0.0175916	0.0266622	0.00951309
Heart	1	Control_AD	Proteinuric_AD	4	5	3.68808	3.71387	0.0257889	0.0312254	0.0572421	0.0156127	0.0255994	0.448206
Muscle	1	Control_AD	Proteinuric_AD	5	3	3.76157	3.81983	0.0582621	0.0322921	0.0367843	0.0144415	0.0212374	0.0565597
Brain	1	Control_AD	Proteinuric_AD	5	4	3.53773	3.48811	-0.0496173	0.0541971	0.070503	0.0242377	0.0352515	0.269722
Lung	1	Control_AD	Proteinuric_AD	5	3	3.44491	3.47571	0.0308	0.0420273	0.0359451	0.0187952	0.0207529	0.333451
Spleen	1	Control_AD	Proteinuric_AD	5	5	3.65036	3.59107	-0.0592902	0.049934	0.0505721	0.0223312	0.0226165	0.0990988
Duodenum	1	Control_AD	Proteinuric_AD	6	4	4.52928	4.5457	0.0164241	0.0419172	0.0836029	0.0171126	0.0418015	0.687491
Jejenum	1	Control_AD	Proteinuric_AD	6	5	3.52749	3.55975	0.0322578	0.0339263	0.0629028	0.0138504	0.028131	0.304928
Ileum	1	Control_AD	Proteinuric_AD	6	4	3.54177	3.56446	0.022693	0.0475732	0.028895	0.0194217	0.0144475	0.42223
Colon	1	Control_AD	Proteinuric_AD	5	4	4.50619	4.50884	0.00264489	0.0564664	0.0257837	0.0252525	0.0128918	0.933953
Erythrocytes	1	Control_AD	Proteinuric_AD	5	4	4.26492	4.30701	0.0420837	0.0452551	0.0561472	0.0202387	0.0280736	0.251686
Plasma	1	Control_AD	Proteinuric_AD	5	5	4.16983	4.15079	-0.0190465	0.0747221	0.04499	0.0334167	0.0201201	0.638444
