# Supplementary material for: Diversion of Arginine’s dietary metabolic fate in proteinuric kidney disease
Source: Research Square preprint supplement (doi:10.21203/rs.3.rs-9927381/v1), 2026-06-17
Supplement: Supplementary file 19 [file b2befda13070a0d84f67f1b1.xlsx]

## Sheet: Both
Week	Genotype	Comparison	Sex	Value	Test_Used	p_value	p_value_rounded_4dp	annotation_for_plot	N_Normal_Proteinuric	Median_Normal_Proteinuric	Q1_Normal_Proteinuric	Q3_Normal_Proteinuric	Min_Normal_Proteinuric	Max_Normal_Proteinuric	N_Asp_Proteinuric	Median_Asp_Proteinuric	Q1_Asp_Proteinuric	Q3_Asp_Proteinuric	Min_Asp_Proteinuric	Max_Asp_Proteinuric
6	NPHS2R231Q/A286V	Normal_Proteinuric vs Asp_Proteinuric	Both	uACR	Mann-Whitney U test (two-sided)	0.0422601	0.0423	p = 0.042	9	13.2745	11.0936	16.8888	5.76245	24.0332	9	8.49283	6.77262	10.6958	6.45732	15.8596
8	NPHS2R231Q/A286V	Normal_Proteinuric vs Asp_Proteinuric	Both	uACR	Mann-Whitney U test (two-sided)	0.250998	0.251	p = 0.251	9	22.7954	21.4824	31.5594	12.4345	54.3855	9	20.2739	19.3462	24.5606	8.76927	43.1451
10	NPHS2R231Q/A286V	Normal_Proteinuric vs Asp_Proteinuric	Both	uACR	Mann-Whitney U test (two-sided)	0.596242	0.5962	p = 0.596	9	16.6064	15.0964	16.8542	11.0731	22.3016	9	17.0386	12.0563	17.9898	11.1866	21.042
12	NPHS2R231Q/A286V	Normal_Proteinuric vs Asp_Proteinuric	Both	uACR	Mann-Whitney U test (two-sided)	0.929637	0.9296	p = 0.930	9	15.8578	14.4751	16.5755	11.7854	18.1235	9	15.6707	14.7476	16.7385	11.7802	24.1938
14	NPHS2R231Q/A286V	Normal_Proteinuric vs Asp_Proteinuric	Both	uACR	Mann-Whitney U test (two-sided)	0.680594	0.6806	p = 0.681	9	16.6528	13.6834	20.4658	10.7968	24.2765	7	16.8019	15.4116	19.0032	14.6841	31.9101
16	NPHS2R231Q/A286V	Normal_Proteinuric vs Asp_Proteinuric	Both	uACR	Mann-Whitney U test (two-sided)	1	1	p = 1.000	7	18.3357	15.8924	18.9708	14.8411	21.3478	5	16.8907	11.7091	21.6567	11.6509	25.247
