# Supplementary material for: Diversion of Arginine’s dietary metabolic fate in proteinuric kidney disease
Source: Research Square preprint supplement (doi:10.21203/rs.3.rs-9927381/v1), 2026-06-17
Supplement: Supplementary file 20 [file b2f2185421c2cf83bd3970b8.xlsx]

## Sheet: Sheet1
Organ	Channel	UniProt_ID	Gene	Mass_Da	MW_kDa	Comparison_AD_Control	Comparison_AD_Proteinuric	Comparison_ND_Proteinuric_vs_Control	log2FC_AD_Control	log2FC_AD_Proteinuric	log2FC_ND_Proteinuric_vs_Control	P_AD_Control	Q_AD_Control	Pep_AD_Control	P_AD_Proteinuric	Q_AD_Proteinuric	Pep_AD_Proteinuric	P_ND	Q_ND	Pep_ND	DeltaRatio
Plasma	Arg10_Pro6	A0A075B5K2	Igkv9-124	10420	10.42	AD_Control.Arg10_Pro6_vs_AD_Control.Unlabeled	AD_Proteinuric.Arg10_Pro6_vs_AD_Proteinuric.Unlabeled	ND_Control.Unlabeled_vs_ND_Proteinuric.Unlabeled	-3.75691	-2.9408	-2.30077	3.10101e-06	6.73175e-07	3	8.96407e-07	2.07813e-07	3	6.74625e-05	1.27599e-05	3	0.81611
Plasma	Arg10_Pro6	A0A075B5M7	Igkv5-39	10345	10.345	AD_Control.Arg10_Pro6_vs_AD_Control.Unlabeled	AD_Proteinuric.Arg10_Pro6_vs_AD_Proteinuric.Unlabeled	ND_Control.Unlabeled_vs_ND_Proteinuric.Unlabeled	-7.46737	-6.23997	-1.43644	8.7702e-07	2.03585e-07	3	1.08406e-09	3.79338e-10	3	0.0190114	0.00288329	3	1.22741
Plasma	Arg10_Pro6	A0A075B5N3	Igkv8-28	10903	10.903	AD_Control.Arg10_Pro6_vs_AD_Control.Unlabeled	AD_Proteinuric.Arg10_Pro6_vs_AD_Proteinuric.Unlabeled	ND_Control.Unlabeled_vs_ND_Proteinuric.Unlabeled	-1.40993	-0.910918	-1.58394	0.000199173	3.61619e-05	4	8.49095e-10	3.0179e-10	4	0.0075369	0.00118329	4	0.499014
Plasma	Arg10_Pro6	A0A075B5N4	Igkv8-27	10976	10.976	AD_Control.Arg10_Pro6_vs_AD_Control.Unlabeled	AD_Proteinuric.Arg10_Pro6_vs_AD_Proteinuric.Unlabeled	ND_Control.Unlabeled_vs_ND_Proteinuric.Unlabeled	-3.19595	-2.82217	-1.60378	0.000207843	3.76738e-05	5	1.8538e-08	5.35228e-09	5	1.98188e-05	3.94461e-06	5	0.37378
Plasma	Arg10_Pro6	A0A075B5N7	Igkv6-13	10441	10.441	AD_Control.Arg10_Pro6_vs_AD_Control.Unlabeled	AD_Proteinuric.Arg10_Pro6_vs_AD_Proteinuric.Unlabeled	ND_Control.Unlabeled_vs_ND_Proteinuric.Unlabeled	-1.82272	-2.42545	-0.841068	0.000489893	8.57712e-05	3	4.67725e-05	8.98064e-06	3	0.302182	0.0403773	3	-0.602723
Plasma	Arg10_Pro6	A0A075B5P3	Ighg2b	36680	36.68	AD_Control.Arg10_Pro6_vs_AD_Control.Unlabeled	AD_Proteinuric.Arg10_Pro6_vs_AD_Proteinuric.Unlabeled	ND_Control.Unlabeled_vs_ND_Proteinuric.Unlabeled	-3.30443	-1.96775	-2.11973	0.00128207	0.00021602	10	4.59926e-06	9.80212e-07	10	0.000868914	0.000148566	10	1.33667
Plasma	Arg10_Pro6	A0A075B5P4	Ighg1	35745	35.745	AD_Control.Arg10_Pro6_vs_AD_Control.Unlabeled	AD_Proteinuric.Arg10_Pro6_vs_AD_Proteinuric.Unlabeled	ND_Control.Unlabeled_vs_ND_Proteinuric.Unlabeled	-8.52341	-8.32752	-3.42076	1.83159e-06	4.08831e-07	11	1.78022e-08	5.15273e-09	11	5.10099e-08	1.3873e-08	11	0.195884
Plasma	Arg10_Pro6	A0A075B5P5	Ighg3	36310	36.31	AD_Control.Arg10_Pro6_vs_AD_Control.Unlabeled	AD_Proteinuric.Arg10_Pro6_vs_AD_Proteinuric.Unlabeled	ND_Control.Unlabeled_vs_ND_Proteinuric.Unlabeled	-4.46707	-3.29332	-1.89607	2.85451e-06	6.22283e-07	9	5.45395e-10	2.00077e-10	9	0.00010186	1.89856e-05	9	1.17375
Plasma	Arg10_Pro6	A0A075B5Q2	Ighv5-9	12795	12.795	AD_Control.Arg10_Pro6_vs_AD_Control.Unlabeled	AD_Proteinuric.Arg10_Pro6_vs_AD_Proteinuric.Unlabeled	ND_Control.Unlabeled_vs_ND_Proteinuric.Unlabeled	-2.0842	-1.04372	-3.12038	0.00739607	0.00116173	2	3.53216e-06	7.62085e-07	2	2.29154e-05	4.53082e-06	2	1.04048
Plasma	Arg10_Pro6	A0A075B5Q3	Ighv2-5	12557	12.557	AD_Control.Arg10_Pro6_vs_AD_Control.Unlabeled	AD_Proteinuric.Arg10_Pro6_vs_AD_Proteinuric.Unlabeled	ND_Control.Unlabeled_vs_ND_Proteinuric.Unlabeled	-0.924475	1.58518	-1.03054	0.288107	0.0386219	2	0.00971498	0.00151104	2	0.00288277	0.000469967	2	2.50966
Plasma	Arg10_Pro6	A0A075B5Q4	Ighv5-12	13075	13.075	AD_Control.Arg10_Pro6_vs_AD_Control.Unlabeled	AD_Proteinuric.Arg10_Pro6_vs_AD_Proteinuric.Unlabeled	ND_Control.Unlabeled_vs_ND_Proteinuric.Unlabeled	-2.02264	-0.577785	-1.47829	0.0063739	0.0010068	4	1.00883e-08	3.02952e-09	4	0.00299829	0.000487936	4	1.44485
Plasma	Arg10_Pro6	A0A075B5R2	Ighv7-3	13457	13.457	AD_Control.Arg10_Pro6_vs_AD_Control.Unlabeled	AD_Proteinuric.Arg10_Pro6_vs_AD_Proteinuric.Unlabeled	ND_Control.Unlabeled_vs_ND_Proteinuric.Unlabeled	-2.9408	-2.06186	-1.58713	4.62108e-05	8.87574e-06	3	1.23623e-08	3.66514e-09	3	0.00060569	0.000105167	3	0.878942
Plasma	Arg10_Pro6	A0A075B5S1	Ighv9-1	11090	11.09	AD_Control.Arg10_Pro6_vs_AD_Control.Unlabeled	AD_Proteinuric.Arg10_Pro6_vs_AD_Proteinuric.Unlabeled	ND_Control.Unlabeled_vs_ND_Proteinuric.Unlabeled	-4.60784	-3.12805	-1.63473	0.0305593	0.0045479	3	0.0404979	0.00595511	3	0.000118082	2.18748e-05	3	1.47979
Plasma	Arg10_Pro6	A0A075B5S2	Ighv7-1	13645	13.645	AD_Control.Arg10_Pro6_vs_AD_Control.Unlabeled	AD_Proteinuric.Arg10_Pro6_vs_AD_Proteinuric.Unlabeled	ND_Control.Unlabeled_vs_ND_Proteinuric.Unlabeled	-1.22445	-0.916311	-0.306799	6.70913e-05	1.26949e-05	5	0.000152534	2.79384e-05	5	0.0982071	0.0138655	5	0.308138
Plasma	Arg10_Pro6	A0A075B5T2	Ighv6-3	13259	13.259	AD_Control.Arg10_Pro6_vs_AD_Control.Unlabeled	AD_Proteinuric.Arg10_Pro6_vs_AD_Proteinuric.Unlabeled	ND_Control.Unlabeled_vs_ND_Proteinuric.Unlabeled	-0.948835	-0.603026	-1.03484	0.0114909	0.00177422	3	4.44001e-07	1.06864e-07	3	0.00217923	0.000359361	3	0.345809
Plasma	Arg10_Pro6	A0A075B5U7	Ighv1-22	13022	13.022	AD_Control.Arg10_Pro6_vs_AD_Control.Unlabeled	AD_Proteinuric.Arg10_Pro6_vs_AD_Proteinuric.Unlabeled	ND_Control.Unlabeled_vs_ND_Proteinuric.Unlabeled	-2.13808	-1.39482	-2.72625	1.72657e-05	3.46154e-06	3	7.98881e-07	1.86497e-07	3	0.0428184	0.00628312	3	0.743263
Plasma	Arg10_Pro6	A0A075B5V5	Ighv1-39	12931	12.931	AD_Control.Arg10_Pro6_vs_AD_Control.Unlabeled	AD_Proteinuric.Arg10_Pro6_vs_AD_Proteinuric.Unlabeled	ND_Control.Unlabeled_vs_ND_Proteinuric.Unlabeled	-4.06823	-2.25537	-1.66094	5.68305e-07	1.35104e-07	2	1.43041e-14	1.32471e-14	2	5.66302e-07	1.3467e-07	2	1.81285
Plasma	Arg10_Pro6	A0A075B5V8	Ighv1-47	11083	11.083	AD_Control.Arg10_Pro6_vs_AD_Control.Unlabeled	AD_Proteinuric.Arg10_Pro6_vs_AD_Proteinuric.Unlabeled	ND_Control.Unlabeled_vs_ND_Proteinuric.Unlabeled	-1.42055	-0.73236	-2.58047	0.00455634	0.00072909	3	0.0272084	0.00406628	3	8.63112e-05	1.61842e-05	3	0.688192
Plasma	Arg10_Pro6	A0A075B5Y3	Ighv1-80	12763	12.763	AD_Control.Arg10_Pro6_vs_AD_Control.Unlabeled	AD_Proteinuric.Arg10_Pro6_vs_AD_Proteinuric.Unlabeled	ND_Control.Unlabeled_vs_ND_Proteinuric.Unlabeled	-5.03614	-4.42347	-1.7116	8.44037e-06	1.75094e-06	2	4.49866e-10	1.67321e-10	2	0.00036243	6.42599e-05	2	0.612666
Plasma	Arg10_Pro6	A0A075B664	Iglv2	12165	12.165	AD_Control.Arg10_Pro6_vs_AD_Control.Unlabeled	AD_Proteinuric.Arg10_Pro6_vs_AD_Proteinuric.Unlabeled	ND_Control.Unlabeled_vs_ND_Proteinuric.Unlabeled	-2.45516	-1.96548	-1.02784	1.97921e-09	6.6425e-10	3	3.25131e-09	1.05361e-09	3	0.000967557	0.000164773	3	0.489673
Plasma	Arg10_Pro6	A0A075B680	Ighv1-62-2	11225	11.225	AD_Control.Arg10_Pro6_vs_AD_Control.Unlabeled	AD_Proteinuric.Arg10_Pro6_vs_AD_Proteinuric.Unlabeled	ND_Control.Unlabeled_vs_ND_Proteinuric.Unlabeled	-3.02614	-1.94999	-0.81215	0.00648786	0.00102389	4	0.0024092	0.000395784	4	0.0705801	0.0101217	4	1.07615
Plasma	Arg10_Pro6	A0A075B6A3	Igha	36830	36.83	AD_Control.Arg10_Pro6_vs_AD_Control.Unlabeled	AD_Proteinuric.Arg10_Pro6_vs_AD_Proteinuric.Unlabeled	ND_Control.Unlabeled_vs_ND_Proteinuric.Unlabeled	-4.61044	-4.80173	-0.114548	1.68725e-09	5.72513e-10	10	1.96291e-07	4.93941e-08	10	0.354219	0.0469145	10	-0.191287
Plasma	Arg10_Pro6	A0A087WPN7	Ighv13-2	11343	11.343	AD_Control.Arg10_Pro6_vs_AD_Control.Unlabeled	AD_Proteinuric.Arg10_Pro6_vs_AD_Proteinuric.Unlabeled	ND_Control.Unlabeled_vs_ND_Proteinuric.Unlabeled	-1.97183	-0.459056	-0.410804	0.137473	0.0191247	4	0.0757341	0.0108265	4	0.0105951	0.00164163	4	1.51277
Plasma	Arg10_Pro6	A0A0A0MQA3	Serpina1a	48796	48.796	AD_Control.Arg10_Pro6_vs_AD_Control.Unlabeled	AD_Proteinuric.Arg10_Pro6_vs_AD_Proteinuric.Unlabeled	ND_Control.Unlabeled_vs_ND_Proteinuric.Unlabeled	-3.41875	-3.66581	-0.709927	3.96377e-10	1.49062e-10	19	2.15057e-13	1.51751e-13	19	0.00112508	0.000190646	19	-0.247055
Plasma	Arg10_Pro6	A0A0A6YW77	Lcn2	31007	31.007	AD_Control.Arg10_Pro6_vs_AD_Control.Unlabeled	AD_Proteinuric.Arg10_Pro6_vs_AD_Proteinuric.Unlabeled	ND_Control.Unlabeled_vs_ND_Proteinuric.Unlabeled	-2.64575	-2.33159	1.81136	0.00595137	0.000943025	2	0.00668244	0.00105337	2	0.0834562	0.011876	2	0.314161
Plasma	Arg10_Pro6	A0A0A6YXN4	Ighv1-18	12913	12.913	AD_Control.Arg10_Pro6_vs_AD_Control.Unlabeled	AD_Proteinuric.Arg10_Pro6_vs_AD_Proteinuric.Unlabeled	ND_Control.Unlabeled_vs_ND_Proteinuric.Unlabeled	-4.42275	-4.72029	-1.41037	1.59248e-06	3.5806e-07	2	1.81534e-11	8.67419e-12	2	0.000728294	0.000125541	2	-0.297542
Plasma	Arg10_Pro6	A0A0A6YXQ0	Ighv8-8	13185	13.185	AD_Control.Arg10_Pro6_vs_AD_Control.Unlabeled	AD_Proteinuric.Arg10_Pro6_vs_AD_Proteinuric.Unlabeled	ND_Control.Unlabeled_vs_ND_Proteinuric.Unlabeled	-5.21186	-5.75466	-3.65388	0.00065212	0.000112863	2	1.17153e-08	3.48228e-09	2	0.000108845	2.02254e-05	2	-0.542803
Plasma	Arg10_Pro6	A0A0A6YY53	Ighg2c	36519	36.519	AD_Control.Arg10_Pro6_vs_AD_Control.Unlabeled	AD_Proteinuric.Arg10_Pro6_vs_AD_Proteinuric.Unlabeled	ND_Control.Unlabeled_vs_ND_Proteinuric.Unlabeled	-7.22477	-5.78886	-1.62804	4.25886e-05	8.2108e-06	8	5.64879e-12	3.00002e-12	8	3.30205e-05	6.43227e-06	8	1.43591
Plasma	Arg10_Pro6	A0A0A6YYE7	Igkv4-57	12689	12.689	AD_Control.Arg10_Pro6_vs_AD_Control.Unlabeled	AD_Proteinuric.Arg10_Pro6_vs_AD_Proteinuric.Unlabeled	ND_Control.Unlabeled_vs_ND_Proteinuric.Unlabeled	-1.2943	-0.12621	0.594942	0.0982359	0.0138687	3	0.00383764	0.000618248	3	0.130246	0.0181611	3	1.16809
Plasma	Arg10_Pro6	A0A0B4J1H7	Igkv1-135	13305	13.305	AD_Control.Arg10_Pro6_vs_AD_Control.Unlabeled	AD_Proteinuric.Arg10_Pro6_vs_AD_Proteinuric.Unlabeled	ND_Control.Unlabeled_vs_ND_Proteinuric.Unlabeled	-4.42963	-2.7384	-0.524004	0.000786264	0.000135036	7	0.0249811	0.00374578	7	0.161805	0.0223373	7	1.69123
Plasma	Arg10_Pro6	A0A0B4J1I1	Igkv16-104	12875	12.875	AD_Control.Arg10_Pro6_vs_AD_Control.Unlabeled	AD_Proteinuric.Arg10_Pro6_vs_AD_Proteinuric.Unlabeled	ND_Control.Unlabeled_vs_ND_Proteinuric.Unlabeled	-5.85649	-4.53496	0.0289532	3.44104e-05	6.68946e-06	2	0.00297607	0.000484525	2	0.0170019	0.00258907	2	1.32152
Plasma	Arg10_Pro6	A0A0B4J1J4	Ighv9-2	13354	13.354	AD_Control.Arg10_Pro6_vs_AD_Control.Unlabeled	AD_Proteinuric.Arg10_Pro6_vs_AD_Proteinuric.Unlabeled	ND_Control.Unlabeled_vs_ND_Proteinuric.Unlabeled	-2.54028	-0.92834	-1.4548	0.00196094	0.000324851	4	0.00826167	0.00129223	4	0.0205186	0.00310248	4	1.61194
Plasma	Arg10_Pro6	A0A0B4J1J6	Ighv10-1	13550	13.55	AD_Control.Arg10_Pro6_vs_AD_Control.Unlabeled	AD_Proteinuric.Arg10_Pro6_vs_AD_Proteinuric.Unlabeled	ND_Control.Unlabeled_vs_ND_Proteinuric.Unlabeled	-1.12006	-0.229662	-0.976445	0.0101479	0.00157488	4	0.000205579	3.7281e-05	4	0.00057866	0.000100634	4	0.890398
Plasma	Arg10_Pro6	A0A0B4J1J7	Ighv1-82	10650	10.65	AD_Control.Arg10_Pro6_vs_AD_Control.Unlabeled	AD_Proteinuric.Arg10_Pro6_vs_AD_Proteinuric.Unlabeled	ND_Control.Unlabeled_vs_ND_Proteinuric.Unlabeled	-1.03675	-0.157125	-1.30979	1.59487e-05	3.21006e-06	3	0.00122106	0.000206268	3	0.000621489	0.000107813	3	0.87963
Plasma	Arg10_Pro6	A0A0B4J1M0	Ighv1-77	10662	10.662	AD_Control.Arg10_Pro6_vs_AD_Control.Unlabeled	AD_Proteinuric.Arg10_Pro6_vs_AD_Proteinuric.Unlabeled	ND_Control.Unlabeled_vs_ND_Proteinuric.Unlabeled	-6.3323	-5.53153	-1.12759	1.09897e-08	3.27842e-09	2	6.32528e-11	2.74123e-11	2	0.00726911	0.00114257	2	0.800771
Plasma	Arg10_Pro6	A0A0G2JE99	Iglc1	11686	11.686	AD_Control.Arg10_Pro6_vs_AD_Control.Unlabeled	AD_Proteinuric.Arg10_Pro6_vs_AD_Proteinuric.Unlabeled	ND_Control.Unlabeled_vs_ND_Proteinuric.Unlabeled	-2.38581	-1.65953	-2.83719	0.000322857	5.75443e-05	5	8.9937e-05	1.68313e-05	5	5.79343e-05	1.10292e-05	5	0.726281
Plasma	Arg10_Pro6	A0A0R4J039	Hrg	60439	60.439	AD_Control.Arg10_Pro6_vs_AD_Control.Unlabeled	AD_Proteinuric.Arg10_Pro6_vs_AD_Proteinuric.Unlabeled	ND_Control.Unlabeled_vs_ND_Proteinuric.Unlabeled	-1.19397	-1.25284	-0.3116	1.36203e-06	3.08865e-07	17	9.20388e-07	2.13115e-07	17	0.309586	0.0413259	17	-0.0588732
Plasma	Arg10_Pro6	A0A0R4J0I1	Serpina3k	46673	46.673	AD_Control.Arg10_Pro6_vs_AD_Control.Unlabeled	AD_Proteinuric.Arg10_Pro6_vs_AD_Proteinuric.Unlabeled	ND_Control.Unlabeled_vs_ND_Proteinuric.Unlabeled	-2.32661	-3.15791	-0.602254	2.86381e-07	7.06079e-08	40	4.69167e-13	3.08058e-13	40	0.0549436	0.00796353	40	-0.831297
Plasma	Arg10_Pro6	A0A140T8M2	Igkv12-44	12557	12.557	AD_Control.Arg10_Pro6_vs_AD_Control.Unlabeled	AD_Proteinuric.Arg10_Pro6_vs_AD_Proteinuric.Unlabeled	ND_Control.Unlabeled_vs_ND_Proteinuric.Unlabeled	-6.54878	-5.62643	-1.17687	1.42338e-10	5.79302e-11	4	1.79807e-07	4.54994e-08	4	0.0304386	0.00453081	4	0.922346
Plasma	Arg10_Pro6	A0A140T8M5	Igkv6-15	12757	12.757	AD_Control.Arg10_Pro6_vs_AD_Control.Unlabeled	AD_Proteinuric.Arg10_Pro6_vs_AD_Proteinuric.Unlabeled	ND_Control.Unlabeled_vs_ND_Proteinuric.Unlabeled	-1.95032	-0.521388	-2.70328	2.17352e-05	4.30855e-06	3	0.0811244	0.0115598	3	0.0334486	0.00496093	3	1.42893
Plasma	Arg10_Pro6	A0A140T8N9	Igkv6-32	12656	12.656	AD_Control.Arg10_Pro6_vs_AD_Control.Unlabeled	AD_Proteinuric.Arg10_Pro6_vs_AD_Proteinuric.Unlabeled	ND_Control.Unlabeled_vs_ND_Proteinuric.Unlabeled	-1.11185	-1.01312	-2.53041	5.68986e-05	1.08428e-05	3	0.000210584	3.81437e-05	3	1.62925e-05	3.27498e-06	3	0.0987239
Plasma	Arg10_Pro6	A0A140T8P9	Igkv14-111	13232	13.232	AD_Control.Arg10_Pro6_vs_AD_Control.Unlabeled	AD_Proteinuric.Arg10_Pro6_vs_AD_Proteinuric.Unlabeled	ND_Control.Unlabeled_vs_ND_Proteinuric.Unlabeled	-5.43138	-4.41451	-1.22192	1.44508e-06	3.26606e-07	4	1.54251e-11	7.47746e-12	4	0.00029449	5.26757e-05	4	1.01687
Plasma	Arg10_Pro6	A0A140T8Q3	Igkv6-17	12760	12.76	AD_Control.Arg10_Pro6_vs_AD_Control.Unlabeled	AD_Proteinuric.Arg10_Pro6_vs_AD_Proteinuric.Unlabeled	ND_Control.Unlabeled_vs_ND_Proteinuric.Unlabeled	-2.66822	-1.59391	-2.4209	0.0340725	0.00504859	5	6.62977e-05	1.25519e-05	5	0.0214492	0.0032364	5	1.07431
Plasma	Arg10_Pro6	A0A1B0GQV5	Saa2	10074	10.074	AD_Control.Arg10_Pro6_vs_AD_Control.Unlabeled	AD_Proteinuric.Arg10_Pro6_vs_AD_Proteinuric.Unlabeled	ND_Control.Unlabeled_vs_ND_Proteinuric.Unlabeled	-3.81863	-3.53717	0.340278	0.193316	0.0264515	4	5.94801e-13	3.81958e-13	4	4.6782e-09	1.47841e-09	4	0.281462
Plasma	Arg10_Pro6	A0A1Y7VJW9	Fbln5	51769	51.769	AD_Control.Arg10_Pro6_vs_AD_Control.Unlabeled	AD_Proteinuric.Arg10_Pro6_vs_AD_Proteinuric.Unlabeled	ND_Control.Unlabeled_vs_ND_Proteinuric.Unlabeled	-1.4408	-2.81348	0.733227	1.5514e-15	1.77898e-15	7	4.88769e-06	1.03899e-06	7	0.00429256	0.000688649	7	-1.37268
Plasma	Arg10_Pro6	A0A2K6EDK8	Dpep2	64783	64.783	AD_Control.Arg10_Pro6_vs_AD_Control.Unlabeled	AD_Proteinuric.Arg10_Pro6_vs_AD_Proteinuric.Unlabeled	ND_Control.Unlabeled_vs_ND_Proteinuric.Unlabeled	-2.17368	-2.59743	-0.666081	1.21226e-07	3.1336e-08	7	1.95895e-10	7.78313e-11	7	0.00136046	0.000228661	7	-0.423746
Plasma	Arg10_Pro6	A0A338P7C0	Psmb1	15637	15.637	AD_Control.Arg10_Pro6_vs_AD_Control.Unlabeled	AD_Proteinuric.Arg10_Pro6_vs_AD_Proteinuric.Unlabeled	ND_Control.Unlabeled_vs_ND_Proteinuric.Unlabeled	-0.796145	-1.84829	0.278252	7.2293e-10	2.59993e-10	6	0.000191723	3.48779e-05	6	0.217702	0.0296369	6	-1.05215
Plasma	Arg10_Pro6	A0A5F8MPW1	Agt	52029	52.029	AD_Control.Arg10_Pro6_vs_AD_Control.Unlabeled	AD_Proteinuric.Arg10_Pro6_vs_AD_Proteinuric.Unlabeled	ND_Control.Unlabeled_vs_ND_Proteinuric.Unlabeled	-3.5552	-3.74996	1.37556	1.31415e-11	6.46838e-12	14	6.70946e-07	1.58136e-07	14	0.108778	0.0152757	14	-0.19476
Plasma	Arg10_Pro6	A8DUK4	Hbb-bs	15748	15.748	AD_Control.Arg10_Pro6_vs_AD_Control.Unlabeled	AD_Proteinuric.Arg10_Pro6_vs_AD_Proteinuric.Unlabeled	ND_Control.Unlabeled_vs_ND_Proteinuric.Unlabeled	-5.67197	-6.09412	-0.83983	1.78867e-06	3.99833e-07	23	0.00331526	0.000537358	23	0.183566	0.0251816	23	-0.422152
Plasma	Arg10_Pro6	B1AXW5	Prdx1	18870	18.87	AD_Control.Arg10_Pro6_vs_AD_Control.Unlabeled	AD_Proteinuric.Arg10_Pro6_vs_AD_Proteinuric.Unlabeled	ND_Control.Unlabeled_vs_ND_Proteinuric.Unlabeled	-1.88042	-2.8479	-0.486708	1.15494e-05	2.35876e-06	9	0.0171722	0.0026138	9	0.0564166	0.00816369	9	-0.967479
Plasma	Arg10_Pro6	D3YZ61	C1qtnf3	34984	34.984	AD_Control.Arg10_Pro6_vs_AD_Control.Unlabeled	AD_Proteinuric.Arg10_Pro6_vs_AD_Proteinuric.Unlabeled	ND_Control.Unlabeled_vs_ND_Proteinuric.Unlabeled	-1.33797	-1.91034	0.442443	0.000166413	3.03935e-05	2	2.5811e-05	5.07808e-06	2	0.00938984	0.00146215	2	-0.572365
Plasma	Arg10_Pro6	E9Q092	Habp2	61298	61.298	AD_Control.Arg10_Pro6_vs_AD_Control.Unlabeled	AD_Proteinuric.Arg10_Pro6_vs_AD_Proteinuric.Unlabeled	ND_Control.Unlabeled_vs_ND_Proteinuric.Unlabeled	-3.89506	-3.84661	-0.336121	9.87552e-09	2.96677e-09	7	2.7267e-08	7.69806e-09	7	0.132828	0.0185077	7	0.0484442
Plasma	Arg10_Pro6	E9Q6F0	Fam3c	11702	11.702	AD_Control.Arg10_Pro6_vs_AD_Control.Unlabeled	AD_Proteinuric.Arg10_Pro6_vs_AD_Proteinuric.Unlabeled	ND_Control.Unlabeled_vs_ND_Proteinuric.Unlabeled	0.876432	-0.373248	0.757447	0.00434366	0.000696217	2	0.0286954	0.0042788	2	0.0622676	0.00897432	2	-1.24968
Plasma	Arg10_Pro6	F6WR04	Ctss	38631	38.631	AD_Control.Arg10_Pro6_vs_AD_Control.Unlabeled	AD_Proteinuric.Arg10_Pro6_vs_AD_Proteinuric.Unlabeled	ND_Control.Unlabeled_vs_ND_Proteinuric.Unlabeled	-13.355	-6.45954	1.25367	9.91286e-14	7.55172e-14	2	9.51842e-09	2.86547e-09	2	0.00840445	0.00131359	2	6.89541
Plasma	Arg10_Pro6	F8WIP8	Spp1	32588	32.588	AD_Control.Arg10_Pro6_vs_AD_Control.Unlabeled	AD_Proteinuric.Arg10_Pro6_vs_AD_Proteinuric.Unlabeled	ND_Control.Unlabeled_vs_ND_Proteinuric.Unlabeled	-1.55592	-1.36899	2.33693	2.85136e-17	4.92896e-17	8	0.0974811	0.0137723	8	0.00965395	0.00150176	8	0.186928
Plasma	Arg10_Pro6	G3X8T9	Serpina3n	46766	46.766	AD_Control.Arg10_Pro6_vs_AD_Control.Unlabeled	AD_Proteinuric.Arg10_Pro6_vs_AD_Proteinuric.Unlabeled	ND_Control.Unlabeled_vs_ND_Proteinuric.Unlabeled	-4.3797	-4.60623	-0.734683	5.62222e-09	1.75533e-09	21	1.13934e-12	6.91398e-13	21	0.00250189	0.000410485	21	-0.226536
Plasma	Arg10_Pro6	H3BIX4	Nptn	24424	24.424	AD_Control.Arg10_Pro6_vs_AD_Control.Unlabeled	AD_Proteinuric.Arg10_Pro6_vs_AD_Proteinuric.Unlabeled	ND_Control.Unlabeled_vs_ND_Proteinuric.Unlabeled	-1.4013	-1.69325	0.251225	9.88575e-05	1.84378e-05	3	0.000107904	2.00666e-05	3	0.331347	0.0440725	3	-0.291942
Plasma	Arg10_Pro6	M0QWU8	Dbi	8664	8.664	AD_Control.Arg10_Pro6_vs_AD_Control.Unlabeled	AD_Proteinuric.Arg10_Pro6_vs_AD_Proteinuric.Unlabeled	ND_Control.Unlabeled_vs_ND_Proteinuric.Unlabeled	-3.80983	-3.96417	0.52212	1.40269e-11	6.87042e-12	2	2.36541e-08	6.73329e-09	2	0.182581	0.0250554	2	-0.15434
Plasma	Arg10_Pro6	O08689	Mstn	42921	42.921	AD_Control.Arg10_Pro6_vs_AD_Control.Unlabeled	AD_Proteinuric.Arg10_Pro6_vs_AD_Proteinuric.Unlabeled	ND_Control.Unlabeled_vs_ND_Proteinuric.Unlabeled	-0.166935	-0.723206	1.40915	5.03298e-05	9.64199e-06	9	0.164719	0.0227179	9	0.0101676	0.00157782	9	-0.556271
Plasma	Arg10_Pro6	O35744	Chil3	44458	44.458	AD_Control.Arg10_Pro6_vs_AD_Control.Unlabeled	AD_Proteinuric.Arg10_Pro6_vs_AD_Proteinuric.Unlabeled	ND_Control.Unlabeled_vs_ND_Proteinuric.Unlabeled	-2.66906	-2.59962	0.864527	1.73431e-09	5.86842e-10	9	0.00164231	0.000274016	9	0.0365508	0.00539811	9	0.0694437
Plasma	Arg10_Pro6	O70250	Pgam2	28827	28.827	AD_Control.Arg10_Pro6_vs_AD_Control.Unlabeled	AD_Proteinuric.Arg10_Pro6_vs_AD_Proteinuric.Unlabeled	ND_Control.Unlabeled_vs_ND_Proteinuric.Unlabeled	-1.79651	-2.37007	-0.51987	0.0345669	0.00511988	3	0.00260212	0.000426231	3	0.21157	0.0288414	3	-0.573559
Plasma	Arg10_Pro6	O88947	F10	54018	54.018	AD_Control.Arg10_Pro6_vs_AD_Control.Unlabeled	AD_Proteinuric.Arg10_Pro6_vs_AD_Proteinuric.Unlabeled	ND_Control.Unlabeled_vs_ND_Proteinuric.Unlabeled	-2.23894	-2.60715	-0.377774	2.81346e-10	1.08512e-10	12	2.9225e-11	1.34436e-11	12	0.0693104	0.00994771	12	-0.36821
Plasma	Arg10_Pro6	P00920	Ca2	29033	29.033	AD_Control.Arg10_Pro6_vs_AD_Control.Unlabeled	AD_Proteinuric.Arg10_Pro6_vs_AD_Proteinuric.Unlabeled	ND_Control.Unlabeled_vs_ND_Proteinuric.Unlabeled	-5.8923	-6.49639	-0.299492	1.10467e-05	2.2595e-06	13	0.00701608	0.00110407	13	0.0911796	0.0129248	13	-0.604089
Plasma	Arg10_Pro6	P01592	Jchain	18014	18.014	AD_Control.Arg10_Pro6_vs_AD_Control.Unlabeled	AD_Proteinuric.Arg10_Pro6_vs_AD_Proteinuric.Unlabeled	ND_Control.Unlabeled_vs_ND_Proteinuric.Unlabeled	-5.28954	-5.16584	-0.864155	1.24434e-07	3.21254e-08	5	2.48148e-06	5.44807e-07	5	0.198569	0.0271494	5	0.123697
Plasma	Arg10_Pro6	P01629	nan	12221	12.221	AD_Control.Arg10_Pro6_vs_AD_Control.Unlabeled	AD_Proteinuric.Arg10_Pro6_vs_AD_Proteinuric.Unlabeled	ND_Control.Unlabeled_vs_ND_Proteinuric.Unlabeled	-2.25317	-2.11866	-2.14077	0.0177911	0.00270461	2	0.166053	0.022895	2	0.0525697	0.00763386	2	0.134507
Plasma	Arg10_Pro6	P01630	nan	12496	12.496	AD_Control.Arg10_Pro6_vs_AD_Control.Unlabeled	AD_Proteinuric.Arg10_Pro6_vs_AD_Proteinuric.Unlabeled	ND_Control.Unlabeled_vs_ND_Proteinuric.Unlabeled	-2.0886	-1.69313	-1.54373	0.0383017	0.0056455	2	6.15034e-09	1.90833e-09	2	0.00587858	0.000932069	2	0.395471
Plasma	Arg10_Pro6	P01642	Gm10881	12615	12.615	AD_Control.Arg10_Pro6_vs_AD_Control.Unlabeled	AD_Proteinuric.Arg10_Pro6_vs_AD_Proteinuric.Unlabeled	ND_Control.Unlabeled_vs_ND_Proteinuric.Unlabeled	-4.65364	-3.84196	-2.39488	0.00012553	2.31581e-05	2	1.86118e-13	1.33412e-13	2	0.019723	0.00298767	2	0.811689
Plasma	Arg10_Pro6	P01644	nan	11910	11.91	AD_Control.Arg10_Pro6_vs_AD_Control.Unlabeled	AD_Proteinuric.Arg10_Pro6_vs_AD_Proteinuric.Unlabeled	ND_Control.Unlabeled_vs_ND_Proteinuric.Unlabeled	-5.11731	-4.01728	-1.23367	2.9416e-05	5.76127e-06	2	3.18484e-10	1.21674e-10	2	0.000169049	3.08602e-05	2	1.10002
Plasma	Arg10_Pro6	P01647	nan	11965	11.965	AD_Control.Arg10_Pro6_vs_AD_Control.Unlabeled	AD_Proteinuric.Arg10_Pro6_vs_AD_Proteinuric.Unlabeled	ND_Control.Unlabeled_vs_ND_Proteinuric.Unlabeled	-2.41476	-0.926328	-1.23868	0.0030959	0.000503182	3	1.75303e-07	4.44915e-08	3	0.000701684	0.000121096	3	1.48843
Plasma	Arg10_Pro6	P01656	nan	11904	11.904	AD_Control.Arg10_Pro6_vs_AD_Control.Unlabeled	AD_Proteinuric.Arg10_Pro6_vs_AD_Proteinuric.Unlabeled	ND_Control.Unlabeled_vs_ND_Proteinuric.Unlabeled	-2.92426	-2.76812	-1.0084	4.96825e-06	1.05476e-06	5	1.188e-07	3.07535e-08	5	0.0101409	0.00157389	5	0.156135
Plasma	Arg10_Pro6	P01675	nan	11627	11.627	AD_Control.Arg10_Pro6_vs_AD_Control.Unlabeled	AD_Proteinuric.Arg10_Pro6_vs_AD_Proteinuric.Unlabeled	ND_Control.Unlabeled_vs_ND_Proteinuric.Unlabeled	-6.15277	-4.35564	-1.18216	1.43166e-05	2.89877e-06	3	3.42791e-06	7.40424e-07	3	0.00252548	0.000414031	3	1.79713
Plasma	Arg10_Pro6	P01803	nan	12691	12.691	AD_Control.Arg10_Pro6_vs_AD_Control.Unlabeled	AD_Proteinuric.Arg10_Pro6_vs_AD_Proteinuric.Unlabeled	ND_Control.Unlabeled_vs_ND_Proteinuric.Unlabeled	-1.40602	-0.86343	-1.4066	0.0346905	0.00513719	2	4.02636e-07	9.75292e-08	2	0.00151842	0.000253933	2	0.542593
Plasma	Arg10_Pro6	P01806	nan	12911	12.911	AD_Control.Arg10_Pro6_vs_AD_Control.Unlabeled	AD_Proteinuric.Arg10_Pro6_vs_AD_Proteinuric.Unlabeled	ND_Control.Unlabeled_vs_ND_Proteinuric.Unlabeled	-2.88415	-2.15256	-2.23491	2.9374e-06	6.39445e-07	5	1.70412e-08	4.95111e-09	5	0.00076289	0.000131276	5	0.731584
Plasma	Arg10_Pro6	P01844	Iglc2	11255	11.255	AD_Control.Arg10_Pro6_vs_AD_Control.Unlabeled	AD_Proteinuric.Arg10_Pro6_vs_AD_Proteinuric.Unlabeled	ND_Control.Unlabeled_vs_ND_Proteinuric.Unlabeled	-1.02111	-1.71692	-3.1065	0.00164152	0.000273904	4	0.00199622	0.000330388	4	0.0331173	0.00491431	4	-0.695807
Plasma	Arg10_Pro6	P01887	B2m	13779	13.779	AD_Control.Arg10_Pro6_vs_AD_Control.Unlabeled	AD_Proteinuric.Arg10_Pro6_vs_AD_Proteinuric.Unlabeled	ND_Control.Unlabeled_vs_ND_Proteinuric.Unlabeled	0.372939	-1.28266	1.24829	2.36849e-13	1.65758e-13	5	0.000781307	0.000134254	5	0.155196	0.021475	5	-1.6556
Plasma	Arg10_Pro6	P01942	Hba	15085	15.085	AD_Control.Arg10_Pro6_vs_AD_Control.Unlabeled	AD_Proteinuric.Arg10_Pro6_vs_AD_Proteinuric.Unlabeled	ND_Control.Unlabeled_vs_ND_Proteinuric.Unlabeled	-5.87679	-6.49235	-0.673605	5.91765e-06	1.24645e-06	12	0.0107366	0.00166288	12	0.358018	0.047385	12	-0.61556
Plasma	Arg10_Pro6	P04247	Mb	17070	17.07	AD_Control.Arg10_Pro6_vs_AD_Control.Unlabeled	AD_Proteinuric.Arg10_Pro6_vs_AD_Proteinuric.Unlabeled	ND_Control.Unlabeled_vs_ND_Proteinuric.Unlabeled	-4.68413	-9.60221	-2.5655	8.28895e-05	1.55654e-05	9	4.32971e-05	8.34181e-06	9	0.00313439	0.00050908	9	-4.91807
Plasma	Arg10_Pro6	P05201	Got1	46248	46.248	AD_Control.Arg10_Pro6_vs_AD_Control.Unlabeled	AD_Proteinuric.Arg10_Pro6_vs_AD_Proteinuric.Unlabeled	ND_Control.Unlabeled_vs_ND_Proteinuric.Unlabeled	-2.47954	-2.86313	-0.412101	0.0024199	0.000397484	14	0.000270184	4.84709e-05	14	0.187785	0.0257298	14	-0.383583
Plasma	Arg10_Pro6	P05208	Cela2a	28914	28.914	AD_Control.Arg10_Pro6_vs_AD_Control.Unlabeled	AD_Proteinuric.Arg10_Pro6_vs_AD_Proteinuric.Unlabeled	ND_Control.Unlabeled_vs_ND_Proteinuric.Unlabeled	-4.19755	-4.37341	-0.91988	1.06959e-08	3.19794e-09	5	1.94462e-07	4.8982e-08	5	0.0270703	0.00404721	5	-0.175863
Plasma	Arg10_Pro6	P05213	Tuba1b	50152	50.152	AD_Control.Arg10_Pro6_vs_AD_Control.Unlabeled	AD_Proteinuric.Arg10_Pro6_vs_AD_Proteinuric.Unlabeled	ND_Control.Unlabeled_vs_ND_Proteinuric.Unlabeled	-2.46272	-2.28905	-0.392239	1.11551e-07	2.89681e-08	11	0.000102012	1.90107e-05	11	0.0985084	0.0139055	11	0.173663
Plasma	Arg10_Pro6	P06330	nan	12934	12.934	AD_Control.Arg10_Pro6_vs_AD_Control.Unlabeled	AD_Proteinuric.Arg10_Pro6_vs_AD_Proteinuric.Unlabeled	ND_Control.Unlabeled_vs_ND_Proteinuric.Unlabeled	-2.44307	-1.94441	-1.6846	0.000146107	2.68038e-05	7	1.08114e-08	3.22857e-09	7	0.000211317	3.82674e-05	7	0.498662
Plasma	Arg10_Pro6	P06797	Ctsl	37547	37.547	AD_Control.Arg10_Pro6_vs_AD_Control.Unlabeled	AD_Proteinuric.Arg10_Pro6_vs_AD_Proteinuric.Unlabeled	ND_Control.Unlabeled_vs_ND_Proteinuric.Unlabeled	-4.33922	-3.73742	0.683566	0.000569075	9.90405e-05	3	0.0171968	0.00261702	3	0.0690706	0.00991452	3	0.601801
Plasma	Arg10_Pro6	P07309	Ttr	15776	15.776	AD_Control.Arg10_Pro6_vs_AD_Control.Unlabeled	AD_Proteinuric.Arg10_Pro6_vs_AD_Proteinuric.Unlabeled	ND_Control.Unlabeled_vs_ND_Proteinuric.Unlabeled	-3.72345	-4.00398	-0.282832	1.46812e-10	5.95931e-11	10	1.10322e-08	3.2894e-09	10	0.0804921	0.0114747	10	-0.280521
Plasma	Arg10_Pro6	P07310	Ckm	43045	43.045	AD_Control.Arg10_Pro6_vs_AD_Control.Unlabeled	AD_Proteinuric.Arg10_Pro6_vs_AD_Proteinuric.Unlabeled	ND_Control.Unlabeled_vs_ND_Proteinuric.Unlabeled	-3.33697	-2.70778	1.04073	0.000288722	5.168e-05	12	0.000136698	2.51357e-05	12	0.0949144	0.0134237	12	0.629185
Plasma	Arg10_Pro6	P07724	Alb	68693	68.693	AD_Control.Arg10_Pro6_vs_AD_Control.Unlabeled	AD_Proteinuric.Arg10_Pro6_vs_AD_Proteinuric.Unlabeled	ND_Control.Unlabeled_vs_ND_Proteinuric.Unlabeled	-2.19861	-2.09071	-0.550948	5.5431e-08	1.49993e-08	69	3.09252e-13	2.10551e-13	69	0.00769202	0.00120624	69	0.107897
Plasma	Arg10_Pro6	P08607	C4bpa	51524	51.524	AD_Control.Arg10_Pro6_vs_AD_Control.Unlabeled	AD_Proteinuric.Arg10_Pro6_vs_AD_Proteinuric.Unlabeled	ND_Control.Unlabeled_vs_ND_Proteinuric.Unlabeled	-4.33372	-4.24833	1.43663	0.00018653	3.39574e-05	12	5.00023e-05	9.58243e-06	12	0.0428221	0.00628327	12	0.085392
Plasma	Arg10_Pro6	P08905	Lyz2	16689	16.689	AD_Control.Arg10_Pro6_vs_AD_Control.Unlabeled	AD_Proteinuric.Arg10_Pro6_vs_AD_Proteinuric.Unlabeled	ND_Control.Unlabeled_vs_ND_Proteinuric.Unlabeled	0.243423	-0.514	1.11984	0.115744	0.0162144	2	0.00184862	0.000307039	2	0.00271705	0.000444331	2	-0.757423
Plasma	Arg10_Pro6	P09411	Pgk1	44550	44.55	AD_Control.Arg10_Pro6_vs_AD_Control.Unlabeled	AD_Proteinuric.Arg10_Pro6_vs_AD_Proteinuric.Unlabeled	ND_Control.Unlabeled_vs_ND_Proteinuric.Unlabeled	-1.35665	-2.37024	-0.898162	0.000858372	0.000146829	13	0.00571346	0.000906824	13	0.0228985	0.00344584	13	-1.01359
Plasma	Arg10_Pro6	P09813	Apoa2	11309	11.309	AD_Control.Arg10_Pro6_vs_AD_Control.Unlabeled	AD_Proteinuric.Arg10_Pro6_vs_AD_Proteinuric.Unlabeled	ND_Control.Unlabeled_vs_ND_Proteinuric.Unlabeled	-3.08028	-3.47122	-1.70464	2.08515e-12	1.20179e-12	7	1.05246e-09	3.6901e-10	7	0.000699021	0.000120645	7	-0.390945
Plasma	Arg10_Pro6	P10404	nan	69613	69.613	AD_Control.Arg10_Pro6_vs_AD_Control.Unlabeled	AD_Proteinuric.Arg10_Pro6_vs_AD_Proteinuric.Unlabeled	ND_Control.Unlabeled_vs_ND_Proteinuric.Unlabeled	0.0739382	-0.721977	-0.575274	0.00699493	0.00110082	4	2.20076e-09	7.32844e-10	4	0.250463	0.0338531	4	-0.795915
Plasma	Arg10_Pro6	P10605	Ctsb	37280	37.28	AD_Control.Arg10_Pro6_vs_AD_Control.Unlabeled	AD_Proteinuric.Arg10_Pro6_vs_AD_Proteinuric.Unlabeled	ND_Control.Unlabeled_vs_ND_Proteinuric.Unlabeled	-2.30387	-3.21738	1.4708	0.000850628	0.000145559	10	3.50804e-05	6.81225e-06	10	0.308879	0.0412411	10	-0.91351
Plasma	Arg10_Pro6	P11404	Fabp3	14819	14.819	AD_Control.Arg10_Pro6_vs_AD_Control.Unlabeled	AD_Proteinuric.Arg10_Pro6_vs_AD_Proteinuric.Unlabeled	ND_Control.Unlabeled_vs_ND_Proteinuric.Unlabeled	-3.20458	-2.82341	-1.13404	0.0296511	0.00441702	8	0.00296736	0.000483209	8	0.0654851	0.00941862	8	0.381174
Plasma	Arg10_Pro6	P11680	Cfp	50327	50.327	AD_Control.Arg10_Pro6_vs_AD_Control.Unlabeled	AD_Proteinuric.Arg10_Pro6_vs_AD_Proteinuric.Unlabeled	ND_Control.Unlabeled_vs_ND_Proteinuric.Unlabeled	-3.72743	-5.91672	-0.42812	6.14339e-07	1.45463e-07	7	5.38814e-05	1.02925e-05	7	0.265768	0.0357959	7	-2.18929
Plasma	Arg10_Pro6	P14106	C1qb	26717	26.717	AD_Control.Arg10_Pro6_vs_AD_Control.Unlabeled	AD_Proteinuric.Arg10_Pro6_vs_AD_Proteinuric.Unlabeled	ND_Control.Unlabeled_vs_ND_Proteinuric.Unlabeled	-4.23374	-4.44138	0.395386	5.92897e-14	4.77215e-14	4	1.73173e-08	5.02373e-09	4	0.343419	0.0455758	4	-0.207647
Plasma	Arg10_Pro6	P15626	Gstm2	25717	25.717	AD_Control.Arg10_Pro6_vs_AD_Control.Unlabeled	AD_Proteinuric.Arg10_Pro6_vs_AD_Proteinuric.Unlabeled	ND_Control.Unlabeled_vs_ND_Proteinuric.Unlabeled	-1.40399	-2.71516	-0.371896	0.00242327	0.000398011	4	0.00124213	0.000209582	4	0.180467	0.024786	4	-1.31118
Plasma	Arg10_Pro6	P15947	Klk1	28775	28.775	AD_Control.Arg10_Pro6_vs_AD_Control.Unlabeled	AD_Proteinuric.Arg10_Pro6_vs_AD_Proteinuric.Unlabeled	ND_Control.Unlabeled_vs_ND_Proteinuric.Unlabeled	-2.8231	-1.77287	-0.122536	0.0408372	0.00600195	4	0.00348624	0.00056416	4	0.0911071	0.0129161	4	1.05024
Plasma	Arg10_Pro6	P16015	Ca3	29366	29.366	AD_Control.Arg10_Pro6_vs_AD_Control.Unlabeled	AD_Proteinuric.Arg10_Pro6_vs_AD_Proteinuric.Unlabeled	ND_Control.Unlabeled_vs_ND_Proteinuric.Unlabeled	-2.24863	-2.35735	0.648656	1.28342e-07	3.30715e-08	12	0.00995173	0.00154609	12	0.181889	0.0249634	12	-0.10872
Plasma	Arg10_Pro6	P17047	Lamp2	45681	45.681	AD_Control.Arg10_Pro6_vs_AD_Control.Unlabeled	AD_Proteinuric.Arg10_Pro6_vs_AD_Proteinuric.Unlabeled	ND_Control.Unlabeled_vs_ND_Proteinuric.Unlabeled	-3.85377	-4.1334	-1.18367	2.10032e-07	5.26334e-08	4	3.79366e-06	8.1568e-07	4	0.00234119	0.000384968	4	-0.279628
Plasma	Arg10_Pro6	P17751	Tpi1	26713	26.713	AD_Control.Arg10_Pro6_vs_AD_Control.Unlabeled	AD_Proteinuric.Arg10_Pro6_vs_AD_Proteinuric.Unlabeled	ND_Control.Unlabeled_vs_ND_Proteinuric.Unlabeled	-2.51501	-3.05302	1.96084	0.0961287	0.0135871	10	0.258488	0.0348581	10	0.280108	0.0376108	10	-0.538015
Plasma	Arg10_Pro6	P18528	nan	11007	11.007	AD_Control.Arg10_Pro6_vs_AD_Control.Unlabeled	AD_Proteinuric.Arg10_Pro6_vs_AD_Proteinuric.Unlabeled	ND_Control.Unlabeled_vs_ND_Proteinuric.Unlabeled	-5.15013	-4.64967	-1.44365	1.63452e-06	3.67155e-07	2	1.07344e-06	2.46376e-07	2	1.77838e-07	4.50751e-08	2	0.500452
Plasma	Arg10_Pro6	P22599	Serpina1b	45975	45.975	AD_Control.Arg10_Pro6_vs_AD_Control.Unlabeled	AD_Proteinuric.Arg10_Pro6_vs_AD_Proteinuric.Unlabeled	ND_Control.Unlabeled_vs_ND_Proteinuric.Unlabeled	-2.6668	-2.80526	-0.417002	3.09402e-07	7.60073e-08	30	1.10819e-08	3.30293e-09	30	0.0208357	0.00314794	30	-0.138459
Plasma	Arg10_Pro6	P23953	Ces1c	61056	61.056	AD_Control.Arg10_Pro6_vs_AD_Control.Unlabeled	AD_Proteinuric.Arg10_Pro6_vs_AD_Proteinuric.Unlabeled	ND_Control.Unlabeled_vs_ND_Proteinuric.Unlabeled	-3.35883	-3.71751	-0.566869	5.06709e-08	1.37889e-08	32	2.27739e-10	8.94295e-11	32	0.298936	0.0399691	32	-0.358683
Plasma	Arg10_Pro6	P24270	Cat	59795	59.795	AD_Control.Arg10_Pro6_vs_AD_Control.Unlabeled	AD_Proteinuric.Arg10_Pro6_vs_AD_Proteinuric.Unlabeled	ND_Control.Unlabeled_vs_ND_Proteinuric.Unlabeled	-4.1488	-4.80193	-0.614295	5.19645e-05	9.94276e-06	18	0.198973	0.0272029	18	0.123816	0.0172948	18	-0.653133
Plasma	Arg10_Pro6	P31428	Dpep1	45722	45.722	AD_Control.Arg10_Pro6_vs_AD_Control.Unlabeled	AD_Proteinuric.Arg10_Pro6_vs_AD_Proteinuric.Unlabeled	ND_Control.Unlabeled_vs_ND_Proteinuric.Unlabeled	-2.57784	-2.6062	0.541056	1.67499e-08	4.87261e-09	7	0.000678569	0.000117282	7	0.0875284	0.0124309	7	-0.0283588
Plasma	Arg10_Pro6	P31725	S100a9	13049	13.049	AD_Control.Arg10_Pro6_vs_AD_Control.Unlabeled	AD_Proteinuric.Arg10_Pro6_vs_AD_Proteinuric.Unlabeled	ND_Control.Unlabeled_vs_ND_Proteinuric.Unlabeled	-1.54025	-1.87675	1.62083	0.122235	0.0170853	2	0.0150302	0.00230037	2	0.00212472	0.000350774	2	-0.336501
Plasma	Arg10_Pro6	P32261	Serpinc1	52004	52.004	AD_Control.Arg10_Pro6_vs_AD_Control.Unlabeled	AD_Proteinuric.Arg10_Pro6_vs_AD_Proteinuric.Unlabeled	ND_Control.Unlabeled_vs_ND_Proteinuric.Unlabeled	-5.65873	-6.24466	-0.515756	6.94739e-12	3.61233e-12	34	1.97173e-08	5.67359e-09	34	0.00019779	3.59279e-05	34	-0.585935
Plasma	Arg10_Pro6	P33587	Proc	51818	51.818	AD_Control.Arg10_Pro6_vs_AD_Control.Unlabeled	AD_Proteinuric.Arg10_Pro6_vs_AD_Proteinuric.Unlabeled	ND_Control.Unlabeled_vs_ND_Proteinuric.Unlabeled	-2.70892	-2.98847	-0.277702	7.96035e-10	2.8407e-10	8	7.55044e-07	1.76747e-07	8	0.223991	0.0304428	8	-0.279551
Plasma	Arg10_Pro6	P43025	Clec3b	22257	22.257	AD_Control.Arg10_Pro6_vs_AD_Control.Unlabeled	AD_Proteinuric.Arg10_Pro6_vs_AD_Proteinuric.Unlabeled	ND_Control.Unlabeled_vs_ND_Proteinuric.Unlabeled	-4.1964	-4.28838	-0.581433	5.42988e-08	1.47136e-08	6	7.05988e-09	2.1701e-09	6	0.0530428	0.00769965	6	-0.0919753
Plasma	Arg10_Pro6	P46412	Gpx3	25424	25.424	AD_Control.Arg10_Pro6_vs_AD_Control.Unlabeled	AD_Proteinuric.Arg10_Pro6_vs_AD_Proteinuric.Unlabeled	ND_Control.Unlabeled_vs_ND_Proteinuric.Unlabeled	-4.9253	-4.96635	-0.528631	2.21562e-08	6.33193e-09	7	2.004e-12	1.15791e-12	7	0.0943518	0.0133498	7	-0.0410522
Plasma	Arg10_Pro6	P47877	Igfbp2	32847	32.847	AD_Control.Arg10_Pro6_vs_AD_Control.Unlabeled	AD_Proteinuric.Arg10_Pro6_vs_AD_Proteinuric.Unlabeled	ND_Control.Unlabeled_vs_ND_Proteinuric.Unlabeled	-3.08095	-4.17833	1.43154	5.97958e-07	1.41788e-07	4	0.000825374	0.000141447	4	0.053367	0.00774476	4	-1.09737
Plasma	Arg10_Pro6	P49722	Psma2	25927	25.927	AD_Control.Arg10_Pro6_vs_AD_Control.Unlabeled	AD_Proteinuric.Arg10_Pro6_vs_AD_Proteinuric.Unlabeled	ND_Control.Unlabeled_vs_ND_Proteinuric.Unlabeled	-1.40894	-1.88706	-0.342918	3.5836e-06	7.7275e-07	6	0.00098265	0.000167306	6	0.13085	0.0182408	6	-0.478113
Plasma	Arg10_Pro6	P51885	Lum	38265	38.265	AD_Control.Arg10_Pro6_vs_AD_Control.Unlabeled	AD_Proteinuric.Arg10_Pro6_vs_AD_Proteinuric.Unlabeled	ND_Control.Unlabeled_vs_ND_Proteinuric.Unlabeled	-4.20455	-4.20691	-0.33688	1.03528e-10	4.31945e-11	12	2.98271e-10	1.14472e-10	12	0.0100455	0.00156003	12	-0.00235827
Plasma	Arg10_Pro6	P51910	Apod	21530	21.53	AD_Control.Arg10_Pro6_vs_AD_Control.Unlabeled	AD_Proteinuric.Arg10_Pro6_vs_AD_Proteinuric.Unlabeled	ND_Control.Unlabeled_vs_ND_Proteinuric.Unlabeled	-3.71764	-3.72131	0.260193	7.93276e-11	3.37571e-11	4	2.71513e-05	5.33268e-06	4	0.276274	0.0371415	4	-0.00366385
Plasma	Arg10_Pro6	P52430	Pon1	39565	39.565	AD_Control.Arg10_Pro6_vs_AD_Control.Unlabeled	AD_Proteinuric.Arg10_Pro6_vs_AD_Proteinuric.Unlabeled	ND_Control.Unlabeled_vs_ND_Proteinuric.Unlabeled	-3.79757	-3.82052	0.700863	8.07812e-06	1.67957e-06	17	0.00288383	0.000470105	17	0.0182166	0.00276783	17	-0.0229582
Plasma	Arg10_Pro6	P55065	Pltp	54453	54.453	AD_Control.Arg10_Pro6_vs_AD_Control.Unlabeled	AD_Proteinuric.Arg10_Pro6_vs_AD_Proteinuric.Unlabeled	ND_Control.Unlabeled_vs_ND_Proteinuric.Unlabeled	-3.66119	-3.90957	0.776323	5.28331e-09	1.65669e-09	19	8.664e-08	2.28177e-08	19	0.297637	0.0398069	19	-0.248378
Plasma	Arg10_Pro6	P60710	Actb	41737	41.737	AD_Control.Arg10_Pro6_vs_AD_Control.Unlabeled	AD_Proteinuric.Arg10_Pro6_vs_AD_Proteinuric.Unlabeled	ND_Control.Unlabeled_vs_ND_Proteinuric.Unlabeled	-1.76514	-1.79836	-0.31771	3.88347e-10	1.4628e-10	6	4.15949e-10	1.55685e-10	6	0.136149	0.0189486	6	-0.0332167
Plasma	Arg10_Pro6	P70195	Psmb7	29891	29.891	AD_Control.Arg10_Pro6_vs_AD_Control.Unlabeled	AD_Proteinuric.Arg10_Pro6_vs_AD_Proteinuric.Unlabeled	ND_Control.Unlabeled_vs_ND_Proteinuric.Unlabeled	-1.78119	-2.37814	-0.220485	2.17505e-07	5.44117e-08	6	1.46046e-06	3.29886e-07	6	0.061263	0.00883394	6	-0.596941
Plasma	Arg10_Pro6	P70274	Selenop	42706	42.706	AD_Control.Arg10_Pro6_vs_AD_Control.Unlabeled	AD_Proteinuric.Arg10_Pro6_vs_AD_Proteinuric.Unlabeled	ND_Control.Unlabeled_vs_ND_Proteinuric.Unlabeled	-1.70616	-1.93609	-0.556596	1.55076e-09	5.29472e-10	11	9.22935e-05	1.72582e-05	11	0.0356183	0.00526849	11	-0.229937
Plasma	Arg10_Pro6	P70375	F7	50276	50.276	AD_Control.Arg10_Pro6_vs_AD_Control.Unlabeled	AD_Proteinuric.Arg10_Pro6_vs_AD_Proteinuric.Unlabeled	ND_Control.Unlabeled_vs_ND_Proteinuric.Unlabeled	-0.378196	-0.83454	0.992743	0.000605592	0.000105158	10	0.000201502	3.65762e-05	10	0.0211789	0.0031975	10	-0.456345
Plasma	Arg10_Pro6	P97290	Serping1	55585	55.585	AD_Control.Arg10_Pro6_vs_AD_Control.Unlabeled	AD_Proteinuric.Arg10_Pro6_vs_AD_Proteinuric.Unlabeled	ND_Control.Unlabeled_vs_ND_Proteinuric.Unlabeled	-2.24679	-2.31589	0.326603	2.65696e-08	7.51404e-09	19	2.05075e-09	6.86659e-10	19	0.0362726	0.00535875	19	-0.0691001
Plasma	Arg10_Pro6	P97298	Serpinf1	46234	46.234	AD_Control.Arg10_Pro6_vs_AD_Control.Unlabeled	AD_Proteinuric.Arg10_Pro6_vs_AD_Proteinuric.Unlabeled	ND_Control.Unlabeled_vs_ND_Proteinuric.Unlabeled	-3.74967	-3.82205	0.851423	8.14686e-11	3.45915e-11	16	3.61781e-07	8.81104e-08	16	6.18727e-05	1.1744e-05	16	-0.0723743
Plasma	Arg10_Pro6	P97797	Sirpa	56414	56.414	AD_Control.Arg10_Pro6_vs_AD_Control.Unlabeled	AD_Proteinuric.Arg10_Pro6_vs_AD_Proteinuric.Unlabeled	ND_Control.Unlabeled_vs_ND_Proteinuric.Unlabeled	-1.11147	-1.69241	-0.3162	0.122671	0.01714	3	0.000118622	2.19677e-05	3	0.0948522	0.0134165	3	-0.580939
Plasma	Arg10_Pro6	P99026	Psmb4	29116	29.116	AD_Control.Arg10_Pro6_vs_AD_Control.Unlabeled	AD_Proteinuric.Arg10_Pro6_vs_AD_Proteinuric.Unlabeled	ND_Control.Unlabeled_vs_ND_Proteinuric.Unlabeled	-1.82463	-2.10784	-1.63791	1.92697e-09	6.48322e-10	6	0.000166893	3.04764e-05	6	0.0937093	0.0132622	6	-0.283204
Plasma	Arg10_Pro6	Q00623	Apoa1	30616	30.616	AD_Control.Arg10_Pro6_vs_AD_Control.Unlabeled	AD_Proteinuric.Arg10_Pro6_vs_AD_Proteinuric.Unlabeled	ND_Control.Unlabeled_vs_ND_Proteinuric.Unlabeled	-2.30068	-2.36215	0.33445	1.39093e-13	1.02541e-13	29	1.07957e-06	2.47686e-07	29	0.0889453	0.0126228	29	-0.0614702
Plasma	Arg10_Pro6	Q00897	Serpina1d	45998	45.998	AD_Control.Arg10_Pro6_vs_AD_Control.Unlabeled	AD_Proteinuric.Arg10_Pro6_vs_AD_Proteinuric.Unlabeled	ND_Control.Unlabeled_vs_ND_Proteinuric.Unlabeled	-1.34406	-1.94747	-0.700124	3.185e-09	1.033e-09	13	5.54993e-14	4.49373e-14	13	0.00107638	0.000182684	13	-0.603415
Plasma	Arg10_Pro6	Q00898	Serpina1e	45891	45.891	AD_Control.Arg10_Pro6_vs_AD_Control.Unlabeled	AD_Proteinuric.Arg10_Pro6_vs_AD_Proteinuric.Unlabeled	ND_Control.Unlabeled_vs_ND_Proteinuric.Unlabeled	-3.54432	-3.93937	-0.582198	0.000138271	2.54168e-05	15	6.79101e-10	2.45263e-10	15	0.343969	0.0456461	15	-0.395055
Plasma	Arg10_Pro6	Q02105	C1qc	25992	25.992	AD_Control.Arg10_Pro6_vs_AD_Control.Unlabeled	AD_Proteinuric.Arg10_Pro6_vs_AD_Proteinuric.Unlabeled	ND_Control.Unlabeled_vs_ND_Proteinuric.Unlabeled	-1.14538	-1.52113	-0.556776	3.26778e-06	7.08024e-07	6	6.7957e-07	1.60038e-07	6	0.115209	0.0161444	6	-0.37575
Plasma	Arg10_Pro6	Q03734	Serpina3m	47064	47.064	AD_Control.Arg10_Pro6_vs_AD_Control.Unlabeled	AD_Proteinuric.Arg10_Pro6_vs_AD_Proteinuric.Unlabeled	ND_Control.Unlabeled_vs_ND_Proteinuric.Unlabeled	-4.18025	-4.09898	-0.588474	3.58766e-08	9.96643e-09	13	2.35436e-07	5.86873e-08	13	0.207921	0.0283624	13	0.0812724
Plasma	Arg10_Pro6	Q05020	Apoc2	10741	10.741	AD_Control.Arg10_Pro6_vs_AD_Control.Unlabeled	AD_Proteinuric.Arg10_Pro6_vs_AD_Proteinuric.Unlabeled	ND_Control.Unlabeled_vs_ND_Proteinuric.Unlabeled	-3.34091	-3.42409	-0.490745	4.56515e-05	8.77415e-06	3	0.000384371	6.79567e-05	3	0.140386	0.0195077	3	-0.0831736
Plasma	Arg10_Pro6	Q07456	Ambp	39029	39.029	AD_Control.Arg10_Pro6_vs_AD_Control.Unlabeled	AD_Proteinuric.Arg10_Pro6_vs_AD_Proteinuric.Unlabeled	ND_Control.Unlabeled_vs_ND_Proteinuric.Unlabeled	-2.68922	-1.44389	-0.675409	0.00389143	0.000626562	9	0.0128836	0.00198236	9	0.00712276	0.00112017	9	1.24533
Plasma	Arg10_Pro6	Q11136	Pepd	55029	55.029	AD_Control.Arg10_Pro6_vs_AD_Control.Unlabeled	AD_Proteinuric.Arg10_Pro6_vs_AD_Proteinuric.Unlabeled	ND_Control.Unlabeled_vs_ND_Proteinuric.Unlabeled	-1.78954	-2.27588	-1.99245	0.00034708	6.16663e-05	10	0.00226269	0.000372511	10	0.0212147	0.00320227	10	-0.48634
Plasma	Arg10_Pro6	Q19LI2	A1bg	56554	56.554	AD_Control.Arg10_Pro6_vs_AD_Control.Unlabeled	AD_Proteinuric.Arg10_Pro6_vs_AD_Proteinuric.Unlabeled	ND_Control.Unlabeled_vs_ND_Proteinuric.Unlabeled	-2.47484	-2.67201	-3.53297	0.00522221	0.000831831	20	6.86454e-07	1.61576e-07	20	0.0575564	0.00831975	20	-0.19717
Plasma	Arg10_Pro6	Q60963	Pla2g7	49258	49.258	AD_Control.Arg10_Pro6_vs_AD_Control.Unlabeled	AD_Proteinuric.Arg10_Pro6_vs_AD_Proteinuric.Unlabeled	ND_Control.Unlabeled_vs_ND_Proteinuric.Unlabeled	-1.75459	-2.34981	0.88429	4.37387e-11	1.94638e-11	11	0.000108823	2.02229e-05	11	0.00292606	0.000476619	11	-0.595227
Plasma	Arg10_Pro6	Q61207	Psap	61422	61.422	AD_Control.Arg10_Pro6_vs_AD_Control.Unlabeled	AD_Proteinuric.Arg10_Pro6_vs_AD_Proteinuric.Unlabeled	ND_Control.Unlabeled_vs_ND_Proteinuric.Unlabeled	-4.91227	-3.96364	0.473565	1.74423e-12	1.02008e-12	12	5.01099e-08	1.36459e-08	12	0.121908	0.0170451	12	0.948626
Plasma	Arg10_Pro6	Q61247	Serpinf2	54972	54.972	AD_Control.Arg10_Pro6_vs_AD_Control.Unlabeled	AD_Proteinuric.Arg10_Pro6_vs_AD_Proteinuric.Unlabeled	ND_Control.Unlabeled_vs_ND_Proteinuric.Unlabeled	-3.78544	-3.97774	-0.21697	4.56016e-14	3.76493e-14	23	1.16741e-08	3.47048e-09	23	0.00105019	0.000178383	23	-0.192294
Plasma	Arg10_Pro6	Q61805	Lbp	53055	53.055	AD_Control.Arg10_Pro6_vs_AD_Control.Unlabeled	AD_Proteinuric.Arg10_Pro6_vs_AD_Proteinuric.Unlabeled	ND_Control.Unlabeled_vs_ND_Proteinuric.Unlabeled	-3.62055	-4.01404	-0.373623	9.32862e-08	2.44786e-08	11	0.00013661	2.51254e-05	11	0.0674252	0.00968679	11	-0.393491
Plasma	Arg10_Pro6	Q62000	Ogn	34012	34.012	AD_Control.Arg10_Pro6_vs_AD_Control.Unlabeled	AD_Proteinuric.Arg10_Pro6_vs_AD_Proteinuric.Unlabeled	ND_Control.Unlabeled_vs_ND_Proteinuric.Unlabeled	-2.67074	-2.91374	0.847093	1.00637e-13	7.65113e-14	6	3.70211e-05	7.1734e-06	6	0.0108998	0.0016868	6	-0.242997
Plasma	Arg10_Pro6	Q6GT24	Prdx6	24827	24.827	AD_Control.Arg10_Pro6_vs_AD_Control.Unlabeled	AD_Proteinuric.Arg10_Pro6_vs_AD_Proteinuric.Unlabeled	ND_Control.Unlabeled_vs_ND_Proteinuric.Unlabeled	-3.08267	-3.97107	-0.522726	1.79356e-06	4.00887e-07	12	0.0247676	0.00371498	12	0.332957	0.0442715	12	-0.888406
Plasma	Arg10_Pro6	Q8BHC0	Lyve1	34574	34.574	AD_Control.Arg10_Pro6_vs_AD_Control.Unlabeled	AD_Proteinuric.Arg10_Pro6_vs_AD_Proteinuric.Unlabeled	ND_Control.Unlabeled_vs_ND_Proteinuric.Unlabeled	-1.42641	-1.15301	1.23653	0.000302484	5.40426e-05	2	0.0164388	0.00250697	2	0.0101216	0.00157111	2	0.2734
Plasma	Arg10_Pro6	Q8BPB5	Efemp1	54953	54.953	AD_Control.Arg10_Pro6_vs_AD_Control.Unlabeled	AD_Proteinuric.Arg10_Pro6_vs_AD_Proteinuric.Unlabeled	ND_Control.Unlabeled_vs_ND_Proteinuric.Unlabeled	-2.70755	-2.9997	0.621802	1.12014e-09	3.90957e-10	8	9.48533e-09	2.857e-09	8	0.071304	0.0102192	8	-0.292152
Plasma	Arg10_Pro6	Q8QZR4	Oaf	31524	31.524	AD_Control.Arg10_Pro6_vs_AD_Control.Unlabeled	AD_Proteinuric.Arg10_Pro6_vs_AD_Proteinuric.Unlabeled	ND_Control.Unlabeled_vs_ND_Proteinuric.Unlabeled	-2.02854	-4.65253	1.25952	1.37659e-05	2.79144e-06	6	0.176844	0.0243189	6	7.76964e-06	1.61821e-06	6	-2.62399
Plasma	Arg10_Pro6	Q8R016	Blmh	52511	52.511	AD_Control.Arg10_Pro6_vs_AD_Control.Unlabeled	AD_Proteinuric.Arg10_Pro6_vs_AD_Proteinuric.Unlabeled	ND_Control.Unlabeled_vs_ND_Proteinuric.Unlabeled	-1.32224	-1.94428	-0.219174	0.103476	0.0145666	4	0.00659871	0.00104067	4	0.0987451	0.0139372	4	-0.622038
Plasma	Arg10_Pro6	Q91X72	Hpx	51318	51.318	AD_Control.Arg10_Pro6_vs_AD_Control.Unlabeled	AD_Proteinuric.Arg10_Pro6_vs_AD_Proteinuric.Unlabeled	ND_Control.Unlabeled_vs_ND_Proteinuric.Unlabeled	-0.26606	-0.67919	-0.706951	0.00998589	0.0015513	26	7.17851e-10	2.58288e-10	26	0.000136659	2.51324e-05	26	-0.41313
Plasma	Arg10_Pro6	Q91XL1	Lrg1	37431	37.431	AD_Control.Arg10_Pro6_vs_AD_Control.Unlabeled	AD_Proteinuric.Arg10_Pro6_vs_AD_Proteinuric.Unlabeled	ND_Control.Unlabeled_vs_ND_Proteinuric.Unlabeled	-3.26207	-3.32565	0.369048	0.00763118	0.00119735	6	2.27193e-08	6.48078e-09	6	0.0706144	0.010126	6	-0.0635746
Plasma	Arg10_Pro6	Q91Y97	Aldob	39507	39.507	AD_Control.Arg10_Pro6_vs_AD_Control.Unlabeled	AD_Proteinuric.Arg10_Pro6_vs_AD_Proteinuric.Unlabeled	ND_Control.Unlabeled_vs_ND_Proteinuric.Unlabeled	-0.594193	-0.922233	-0.945915	0.000511087	8.93801e-05	10	0.00315989	0.000513076	10	0.2927	0.0392011	10	-0.32804
Plasma	Arg10_Pro6	Q99P87	Retn	12492	12.492	AD_Control.Arg10_Pro6_vs_AD_Control.Unlabeled	AD_Proteinuric.Arg10_Pro6_vs_AD_Proteinuric.Unlabeled	ND_Control.Unlabeled_vs_ND_Proteinuric.Unlabeled	-0.655449	-0.677835	0.485344	0.00950456	0.00147941	3	0.245352	0.0331914	3	0.00152456	0.000254903	3	-0.0223866
Plasma	Arg10_Pro6	Q9CQF9	Pcyox1	56495	56.495	AD_Control.Arg10_Pro6_vs_AD_Control.Unlabeled	AD_Proteinuric.Arg10_Pro6_vs_AD_Proteinuric.Unlabeled	ND_Control.Unlabeled_vs_ND_Proteinuric.Unlabeled	-1.67464	-1.51111	0.615275	0.0213979	0.00322908	14	0.000175689	3.20421e-05	14	0.156706	0.0216736	14	0.163536
Plasma	Arg10_Pro6	Q9CQW3	Proz	44304	44.304	AD_Control.Arg10_Pro6_vs_AD_Control.Unlabeled	AD_Proteinuric.Arg10_Pro6_vs_AD_Proteinuric.Unlabeled	ND_Control.Unlabeled_vs_ND_Proteinuric.Unlabeled	-0.0336964	-0.509995	0.618985	0.0587994	0.00849358	3	0.000693539	0.000119762	3	0.0195234	0.00295821	3	-0.476299
Plasma	Arg10_Pro6	Q9CZ52	Antxr1	62308	62.308	AD_Control.Arg10_Pro6_vs_AD_Control.Unlabeled	AD_Proteinuric.Arg10_Pro6_vs_AD_Proteinuric.Unlabeled	ND_Control.Unlabeled_vs_ND_Proteinuric.Unlabeled	-8.09275	-7.05924	1.88399	0.012952	0.00199242	9	0.00189683	0.000314773	9	0.020975	0.00316796	9	1.03351
Plasma	Arg10_Pro6	Q9D7Q1	Chit1	51112	51.112	AD_Control.Arg10_Pro6_vs_AD_Control.Unlabeled	AD_Proteinuric.Arg10_Pro6_vs_AD_Proteinuric.Unlabeled	ND_Control.Unlabeled_vs_ND_Proteinuric.Unlabeled	-2.46677	-2.41446	0.297163	0.00383294	0.000617533	6	0.000949338	0.000161802	6	0.249282	0.0337014	6	0.0523037
Plasma	Arg10_Pro6	Q9DBB9	Cpn2	60479	60.479	AD_Control.Arg10_Pro6_vs_AD_Control.Unlabeled	AD_Proteinuric.Arg10_Pro6_vs_AD_Proteinuric.Unlabeled	ND_Control.Unlabeled_vs_ND_Proteinuric.Unlabeled	-1.55199	-2.01894	-0.266978	2.06527e-14	1.8488e-14	17	1.64587e-11	7.94344e-12	17	0.0473303	0.00690783	17	-0.466953
Plasma	Arg10_Pro6	Q9ER05	Ctrl	28135	28.135	AD_Control.Arg10_Pro6_vs_AD_Control.Unlabeled	AD_Proteinuric.Arg10_Pro6_vs_AD_Proteinuric.Unlabeled	ND_Control.Unlabeled_vs_ND_Proteinuric.Unlabeled	-9.96152	-10.5405	-0.904432	1.68649e-10	6.77889e-11	3	0.0479919	0.00699863	3	0.345515	0.0458275	3	-0.578943
Plasma	Arg10_Pro6	Q9JHH6	Cpb2	48871	48.871	AD_Control.Arg10_Pro6_vs_AD_Control.Unlabeled	AD_Proteinuric.Arg10_Pro6_vs_AD_Proteinuric.Unlabeled	ND_Control.Unlabeled_vs_ND_Proteinuric.Unlabeled	-3.30819	-3.31958	-0.0715146	1.48922e-05	3.00555e-06	12	7.96531e-09	2.42674e-09	12	0.278403	0.0373929	12	-0.0113931
Plasma	Arg10_Pro6	Q9QWK4	Cd5l	38863	38.863	AD_Control.Arg10_Pro6_vs_AD_Control.Unlabeled	AD_Proteinuric.Arg10_Pro6_vs_AD_Proteinuric.Unlabeled	ND_Control.Unlabeled_vs_ND_Proteinuric.Unlabeled	-0.0426639	-0.71376	0.0814533	0.253918	0.0342919	12	0.100619	0.0141892	12	0.249397	0.033713	12	-0.671096
Plasma	Arg10_Pro6	Q9QXC1	Fetub	42713	42.713	AD_Control.Arg10_Pro6_vs_AD_Control.Unlabeled	AD_Proteinuric.Arg10_Pro6_vs_AD_Proteinuric.Unlabeled	ND_Control.Unlabeled_vs_ND_Proteinuric.Unlabeled	-2.04981	-1.09955	-0.183612	0.00325823	0.000528485	11	4.59863e-07	1.10451e-07	11	0.0353214	0.00522693	11	0.950259
Plasma	Arg10_Pro6	Q9R111	Gda	51013	51.013	AD_Control.Arg10_Pro6_vs_AD_Control.Unlabeled	AD_Proteinuric.Arg10_Pro6_vs_AD_Proteinuric.Unlabeled	ND_Control.Unlabeled_vs_ND_Proteinuric.Unlabeled	-2.88162	-4.10025	-1.53274	5.07076e-05	9.70951e-06	14	0.0715759	0.0102569	14	0.0621112	0.00895345	14	-1.21863
Plasma	Arg10_Pro6	Q9R1P1	Psmb3	22965	22.965	AD_Control.Arg10_Pro6_vs_AD_Control.Unlabeled	AD_Proteinuric.Arg10_Pro6_vs_AD_Proteinuric.Unlabeled	ND_Control.Unlabeled_vs_ND_Proteinuric.Unlabeled	-1.47133	-2.13308	-0.27913	6.91213e-08	1.84847e-08	5	0.256013	0.0345486	5	0.158874	0.0219602	5	-0.661753
Plasma	Arg10_Pro6	Q9R1P4	Psma1	29547	29.547	AD_Control.Arg10_Pro6_vs_AD_Control.Unlabeled	AD_Proteinuric.Arg10_Pro6_vs_AD_Proteinuric.Unlabeled	ND_Control.Unlabeled_vs_ND_Proteinuric.Unlabeled	-4.29241	-4.77777	0.0260321	2.56066e-13	1.78019e-13	10	8.33465e-08	2.20409e-08	10	0.256721	0.0346339	10	-0.485359
Plasma	Arg10_Pro6	Q9WUU7	Ctsz	33996	33.996	AD_Control.Arg10_Pro6_vs_AD_Control.Unlabeled	AD_Proteinuric.Arg10_Pro6_vs_AD_Proteinuric.Unlabeled	ND_Control.Unlabeled_vs_ND_Proteinuric.Unlabeled	-0.906681	-1.42763	1.02914	0.000247124	4.44897e-05	7	6.05092e-05	1.15013e-05	7	0.181001	0.0248526	7	-0.520954
Plasma	Arg10_Pro6	Q9Z2U0	Psma7	27855	27.855	AD_Control.Arg10_Pro6_vs_AD_Control.Unlabeled	AD_Proteinuric.Arg10_Pro6_vs_AD_Proteinuric.Unlabeled	ND_Control.Unlabeled_vs_ND_Proteinuric.Unlabeled	-0.287094	-1.59514	-0.0387081	0.00952448	0.00148231	7	4.03411e-06	8.65444e-07	7	0.164487	0.0226872	7	-1.30804
Plasma	Arg7_Pro6	A0A075B5P3	Ighg2b	36680	36.68	AD_Control.Arg7_Pro6_vs_AD_Control.Unlabeled	AD_Proteinuric.Arg7_Pro6_vs_AD_Proteinuric.Unlabeled	ND_Control.Unlabeled_vs_ND_Proteinuric.Unlabeled	-0.921984	0.149374	-2.11973	0.231273	0.0313936	10	0.279969	0.0375945	10	0.000868914	0.000148566	10	1.07136
Plasma	Arg7_Pro6	A0A075B5P5	Ighg3	36310	36.31	AD_Control.Arg7_Pro6_vs_AD_Control.Unlabeled	AD_Proteinuric.Arg7_Pro6_vs_AD_Proteinuric.Unlabeled	ND_Control.Unlabeled_vs_ND_Proteinuric.Unlabeled	-3.01743	-2.12197	-1.89607	0.000223049	4.03254e-05	9	3.8748e-09	1.23998e-09	9	0.00010186	1.89856e-05	9	0.895468
Plasma	Arg7_Pro6	A0A075B5R1	Ighv5-17	12905	12.905	AD_Control.Arg7_Pro6_vs_AD_Control.Unlabeled	AD_Proteinuric.Arg7_Pro6_vs_AD_Proteinuric.Unlabeled	ND_Control.Unlabeled_vs_ND_Proteinuric.Unlabeled	-1.61276	-0.891813	-1.75747	0.132899	0.0185164	2	0.0900781	0.0127773	2	0.000342906	6.09657e-05	2	0.720944
Plasma	Arg7_Pro6	A0A075B5R2	Ighv7-3	13457	13.457	AD_Control.Arg7_Pro6_vs_AD_Control.Unlabeled	AD_Proteinuric.Arg7_Pro6_vs_AD_Proteinuric.Unlabeled	ND_Control.Unlabeled_vs_ND_Proteinuric.Unlabeled	-0.355991	0.312228	-1.58713	0.306695	0.0409614	3	0.188969	0.0258797	3	0.00060569	0.000105167	3	0.668219
Plasma	Arg7_Pro6	A0A075B5S2	Ighv7-1	13645	13.645	AD_Control.Arg7_Pro6_vs_AD_Control.Unlabeled	AD_Proteinuric.Arg7_Pro6_vs_AD_Proteinuric.Unlabeled	ND_Control.Unlabeled_vs_ND_Proteinuric.Unlabeled	-0.548028	-0.985556	-0.306799	0.0915132	0.0129689	5	0.00617567	0.000977158	5	0.0982071	0.0138655	5	-0.437528
Plasma	Arg7_Pro6	A0A075B5T3	Ighv6-6	13293	13.293	AD_Control.Arg7_Pro6_vs_AD_Control.Unlabeled	AD_Proteinuric.Arg7_Pro6_vs_AD_Proteinuric.Unlabeled	ND_Control.Unlabeled_vs_ND_Proteinuric.Unlabeled	-2.32788	-2.13541	-1.14796	5.96668e-05	1.13515e-05	6	1.78185e-05	3.56648e-06	6	0.00131301	0.00022104	6	0.192468
Plasma	Arg7_Pro6	A0A075B680	Ighv1-62-2	11225	11.225	AD_Control.Arg7_Pro6_vs_AD_Control.Unlabeled	AD_Proteinuric.Arg7_Pro6_vs_AD_Proteinuric.Unlabeled	ND_Control.Unlabeled_vs_ND_Proteinuric.Unlabeled	-0.474029	0.16336	-0.81215	0.213542	0.0290982	4	0.0652135	0.00938072	4	0.0705801	0.0101217	4	0.637389
Plasma	Arg7_Pro6	A0A0A6YYE7	Igkv4-57	12689	12.689	AD_Control.Arg7_Pro6_vs_AD_Control.Unlabeled	AD_Proteinuric.Arg7_Pro6_vs_AD_Proteinuric.Unlabeled	ND_Control.Unlabeled_vs_ND_Proteinuric.Unlabeled	-2.25872	-1.21784	0.594942	0.0179167	0.00272318	3	3.06679e-08	8.61497e-09	3	0.130246	0.0181611	3	1.04088
Plasma	Arg7_Pro6	A0A0B4J1J4	Ighv9-2	13354	13.354	AD_Control.Arg7_Pro6_vs_AD_Control.Unlabeled	AD_Proteinuric.Arg7_Pro6_vs_AD_Proteinuric.Unlabeled	ND_Control.Unlabeled_vs_ND_Proteinuric.Unlabeled	-1.22944	-0.336086	-1.4548	0.00357506	0.000577842	4	6.02358e-05	1.14522e-05	4	0.0205186	0.00310248	4	0.89335
Plasma	Arg7_Pro6	A0A0G2JE99	Iglc1	11686	11.686	AD_Control.Arg7_Pro6_vs_AD_Control.Unlabeled	AD_Proteinuric.Arg7_Pro6_vs_AD_Proteinuric.Unlabeled	ND_Control.Unlabeled_vs_ND_Proteinuric.Unlabeled	-0.708808	-0.393407	-2.83719	0.199523	0.0272684	5	0.346987	0.0460016	5	5.79343e-05	1.10292e-05	5	0.315401
Plasma	Arg7_Pro6	A0A0R4J039	Hrg	60439	60.439	AD_Control.Arg7_Pro6_vs_AD_Control.Unlabeled	AD_Proteinuric.Arg7_Pro6_vs_AD_Proteinuric.Unlabeled	ND_Control.Unlabeled_vs_ND_Proteinuric.Unlabeled	-5.38827	-5.33298	-0.3116	3.31244e-11	1.50869e-11	17	1.5545e-10	6.2856e-11	17	0.309586	0.0413259	17	0.0552905
Plasma	Arg7_Pro6	A0A0R4J0I1	Serpina3k	46673	46.673	AD_Control.Arg7_Pro6_vs_AD_Control.Unlabeled	AD_Proteinuric.Arg7_Pro6_vs_AD_Proteinuric.Unlabeled	ND_Control.Unlabeled_vs_ND_Proteinuric.Unlabeled	-3.83656	-4.60288	-0.602254	5.8811e-10	2.14688e-10	40	1.61284e-12	9.49745e-13	40	0.0549436	0.00796353	40	-0.766319
Plasma	Arg7_Pro6	A0A1W2P6Q2	Icosl	38544	38.544	AD_Control.Arg7_Pro6_vs_AD_Control.Unlabeled	AD_Proteinuric.Arg7_Pro6_vs_AD_Proteinuric.Unlabeled	ND_Control.Unlabeled_vs_ND_Proteinuric.Unlabeled	0.215173	-0.209363	-0.618907	0.365718	0.0483486	4	0.000649375	0.000112422	4	0.0406049	0.0059701	4	-0.424536
Plasma	Arg7_Pro6	A0A5F8MPW1	Agt	52029	52.029	AD_Control.Arg7_Pro6_vs_AD_Control.Unlabeled	AD_Proteinuric.Arg7_Pro6_vs_AD_Proteinuric.Unlabeled	ND_Control.Unlabeled_vs_ND_Proteinuric.Unlabeled	-7.96597	-8.48563	1.37556	6.18625e-14	4.95846e-14	14	4.54531e-09	1.43799e-09	14	0.108778	0.0152757	14	-0.519658
Plasma	Arg7_Pro6	P01642	Gm10881	12615	12.615	AD_Control.Arg7_Pro6_vs_AD_Control.Unlabeled	AD_Proteinuric.Arg7_Pro6_vs_AD_Proteinuric.Unlabeled	ND_Control.Unlabeled_vs_ND_Proteinuric.Unlabeled	-2.64543	-2.05057	-2.39488	0.00665463	0.00104913	2	1.3936e-14	1.29583e-14	2	0.019723	0.00298767	2	0.594863
Plasma	Arg7_Pro6	P01803	nan	12691	12.691	AD_Control.Arg7_Pro6_vs_AD_Control.Unlabeled	AD_Proteinuric.Arg7_Pro6_vs_AD_Proteinuric.Unlabeled	ND_Control.Unlabeled_vs_ND_Proteinuric.Unlabeled	-4.1477	-3.96864	-1.4066	2.19973e-05	4.359e-06	2	2.83323e-10	1.0909e-10	2	0.00151842	0.000253933	2	0.179065
Plasma	Arg7_Pro6	P01942	Hba	15085	15.085	AD_Control.Arg7_Pro6_vs_AD_Control.Unlabeled	AD_Proteinuric.Arg7_Pro6_vs_AD_Proteinuric.Unlabeled	ND_Control.Unlabeled_vs_ND_Proteinuric.Unlabeled	-3.4988	-4.47861	-0.673605	0.00077613	0.000133474	12	0.0684419	0.00982795	12	0.358018	0.047385	12	-0.979809
Plasma	Arg7_Pro6	P05208	Cela2a	28914	28.914	AD_Control.Arg7_Pro6_vs_AD_Control.Unlabeled	AD_Proteinuric.Arg7_Pro6_vs_AD_Proteinuric.Unlabeled	ND_Control.Unlabeled_vs_ND_Proteinuric.Unlabeled	-3.27974	-3.39328	-0.91988	9.57479e-08	2.50817e-08	5	1.14466e-06	2.61967e-07	5	0.0270703	0.00404721	5	-0.113543
Plasma	Arg7_Pro6	P07724	Alb	68693	68.693	AD_Control.Arg7_Pro6_vs_AD_Control.Unlabeled	AD_Proteinuric.Arg7_Pro6_vs_AD_Proteinuric.Unlabeled	ND_Control.Unlabeled_vs_ND_Proteinuric.Unlabeled	-6.8616	-7.14831	-0.550948	1.7204e-13	1.2417e-13	69	3.53557e-16	4.73188e-16	69	0.00769202	0.00120624	69	-0.286712
Plasma	Arg7_Pro6	P10404	nan	69613	69.613	AD_Control.Arg7_Pro6_vs_AD_Control.Unlabeled	AD_Proteinuric.Arg7_Pro6_vs_AD_Proteinuric.Unlabeled	ND_Control.Unlabeled_vs_ND_Proteinuric.Unlabeled	-2.01672	-2.37598	-0.575274	2.28349e-06	5.03513e-07	4	7.33202e-08	1.95238e-08	4	0.250463	0.0338531	4	-0.359262
Plasma	Arg7_Pro6	P11404	Fabp3	14819	14.819	AD_Control.Arg7_Pro6_vs_AD_Control.Unlabeled	AD_Proteinuric.Arg7_Pro6_vs_AD_Proteinuric.Unlabeled	ND_Control.Unlabeled_vs_ND_Proteinuric.Unlabeled	-1.64225	-4.1991	-1.13404	0.0822854	0.0117166	8	0.000248148	4.46636e-05	8	0.0654851	0.00941862	8	-2.55684
Plasma	Arg7_Pro6	P16015	Ca3	29366	29.366	AD_Control.Arg7_Pro6_vs_AD_Control.Unlabeled	AD_Proteinuric.Arg7_Pro6_vs_AD_Proteinuric.Unlabeled	ND_Control.Unlabeled_vs_ND_Proteinuric.Unlabeled	0.199764	-0.412324	0.648656	0.0821933	0.0117049	12	0.00999437	0.00155251	12	0.181889	0.0249634	12	-0.612088
Plasma	Arg7_Pro6	P22599	Serpina1b	45975	45.975	AD_Control.Arg7_Pro6_vs_AD_Control.Unlabeled	AD_Proteinuric.Arg7_Pro6_vs_AD_Proteinuric.Unlabeled	ND_Control.Unlabeled_vs_ND_Proteinuric.Unlabeled	-4.45144	-4.87046	-0.417002	4.45533e-09	1.41165e-09	30	3.48935e-10	1.32278e-10	30	0.0208357	0.00314794	30	-0.419028
Plasma	Arg7_Pro6	P23953	Ces1c	61056	61.056	AD_Control.Arg7_Pro6_vs_AD_Control.Unlabeled	AD_Proteinuric.Arg7_Pro6_vs_AD_Proteinuric.Unlabeled	ND_Control.Unlabeled_vs_ND_Proteinuric.Unlabeled	-8.42546	-9.02904	-0.566869	1.34508e-10	5.50055e-11	32	3.5416e-12	1.95335e-12	32	0.298936	0.0399691	32	-0.603583
Plasma	Arg7_Pro6	P24270	Cat	59795	59.795	AD_Control.Arg7_Pro6_vs_AD_Control.Unlabeled	AD_Proteinuric.Arg7_Pro6_vs_AD_Proteinuric.Unlabeled	ND_Control.Unlabeled_vs_ND_Proteinuric.Unlabeled	-2.8787	-3.93221	-0.614295	3.54943e-05	6.88972e-06	18	0.287744	0.0385755	18	0.123816	0.0172948	18	-1.05351
Plasma	Arg7_Pro6	P31725	S100a9	13049	13.049	AD_Control.Arg7_Pro6_vs_AD_Control.Unlabeled	AD_Proteinuric.Arg7_Pro6_vs_AD_Proteinuric.Unlabeled	ND_Control.Unlabeled_vs_ND_Proteinuric.Unlabeled	-0.959827	-1.17269	1.62083	0.0784925	0.0112028	2	0.0199799	0.00302401	2	0.00212472	0.000350774	2	-0.212863
Plasma	Arg7_Pro6	P32261	Serpinc1	52004	52.004	AD_Control.Arg7_Pro6_vs_AD_Control.Unlabeled	AD_Proteinuric.Arg7_Pro6_vs_AD_Proteinuric.Unlabeled	ND_Control.Unlabeled_vs_ND_Proteinuric.Unlabeled	-9.71507	-9.83841	-0.515756	5.35463e-14	4.35394e-14	34	4.08078e-10	1.52963e-10	34	0.00019779	3.59279e-05	34	-0.123337
Plasma	Arg7_Pro6	P46412	Gpx3	25424	25.424	AD_Control.Arg7_Pro6_vs_AD_Control.Unlabeled	AD_Proteinuric.Arg7_Pro6_vs_AD_Proteinuric.Unlabeled	ND_Control.Unlabeled_vs_ND_Proteinuric.Unlabeled	-3.90209	-4.14499	-0.528631	1.72877e-07	4.39047e-08	7	7.34049e-12	3.79703e-12	7	0.0943518	0.0133498	7	-0.242897
Plasma	Arg7_Pro6	P55065	Pltp	54453	54.453	AD_Control.Arg7_Pro6_vs_AD_Control.Unlabeled	AD_Proteinuric.Arg7_Pro6_vs_AD_Proteinuric.Unlabeled	ND_Control.Unlabeled_vs_ND_Proteinuric.Unlabeled	-1.68148	-2.76016	0.776323	1.36262e-06	3.08969e-07	19	4.28119e-07	1.03268e-07	19	0.297637	0.0398069	19	-1.07868
Plasma	Arg7_Pro6	P60710	Actb	41737	41.737	AD_Control.Arg7_Pro6_vs_AD_Control.Unlabeled	AD_Proteinuric.Arg7_Pro6_vs_AD_Proteinuric.Unlabeled	ND_Control.Unlabeled_vs_ND_Proteinuric.Unlabeled	-0.324156	-0.43516	-0.31771	2.78697e-05	5.46771e-06	6	0.000125284	2.31197e-05	6	0.136149	0.0189486	6	-0.111005
Plasma	Arg7_Pro6	P70274	Selenop	42706	42.706	AD_Control.Arg7_Pro6_vs_AD_Control.Unlabeled	AD_Proteinuric.Arg7_Pro6_vs_AD_Proteinuric.Unlabeled	ND_Control.Unlabeled_vs_ND_Proteinuric.Unlabeled	-1.51718	-1.92949	-0.556596	1.18286e-10	4.88306e-11	11	2.89661e-05	5.6751e-06	11	0.0356183	0.00526849	11	-0.412314
Plasma	Arg7_Pro6	P97290	Serping1	55585	55.585	AD_Control.Arg7_Pro6_vs_AD_Control.Unlabeled	AD_Proteinuric.Arg7_Pro6_vs_AD_Proteinuric.Unlabeled	ND_Control.Unlabeled_vs_ND_Proteinuric.Unlabeled	-5.99984	-8.46154	0.326603	6.69187e-13	4.25461e-13	19	6.10233e-15	6.09704e-15	19	0.0362726	0.00535875	19	-2.4617
Plasma	Arg7_Pro6	P97298	Serpinf1	46234	46.234	AD_Control.Arg7_Pro6_vs_AD_Control.Unlabeled	AD_Proteinuric.Arg7_Pro6_vs_AD_Proteinuric.Unlabeled	ND_Control.Unlabeled_vs_ND_Proteinuric.Unlabeled	-3.81965	-4.03638	0.851423	2.22996e-10	8.77673e-11	16	2.3107e-07	5.76488e-08	16	6.18727e-05	1.1744e-05	16	-0.216724
Plasma	Arg7_Pro6	Q00623	Apoa1	30616	30.616	AD_Control.Arg7_Pro6_vs_AD_Control.Unlabeled	AD_Proteinuric.Arg7_Pro6_vs_AD_Proteinuric.Unlabeled	ND_Control.Unlabeled_vs_ND_Proteinuric.Unlabeled	-2.49702	-2.73285	0.33445	6.85834e-14	5.44793e-14	29	1.43994e-07	3.68862e-08	29	0.0889453	0.0126228	29	-0.235827
Plasma	Arg7_Pro6	Q00897	Serpina1d	45998	45.998	AD_Control.Arg7_Pro6_vs_AD_Control.Unlabeled	AD_Proteinuric.Arg7_Pro6_vs_AD_Proteinuric.Unlabeled	ND_Control.Unlabeled_vs_ND_Proteinuric.Unlabeled	-4.25264	-4.66016	-0.700124	1.72494e-12	1.01034e-12	13	7.43324e-13	4.67569e-13	13	0.00107638	0.000182684	13	-0.40752
Plasma	Arg7_Pro6	Q03734	Serpina3m	47064	47.064	AD_Control.Arg7_Pro6_vs_AD_Control.Unlabeled	AD_Proteinuric.Arg7_Pro6_vs_AD_Proteinuric.Unlabeled	ND_Control.Unlabeled_vs_ND_Proteinuric.Unlabeled	-22.2759	-21.9432	-0.588474	4.21187e-12	2.29124e-12	13	1.16066e-10	4.79744e-11	13	0.207921	0.0283624	13	0.332718
Plasma	Arg7_Pro6	Q05020	Apoc2	10741	10.741	AD_Control.Arg7_Pro6_vs_AD_Control.Unlabeled	AD_Proteinuric.Arg7_Pro6_vs_AD_Proteinuric.Unlabeled	ND_Control.Unlabeled_vs_ND_Proteinuric.Unlabeled	-9.92224	-7.51368	-0.490745	6.26223e-08	1.68228e-08	3	1.11889e-05	2.28757e-06	3	0.140386	0.0195077	3	2.40856
Plasma	Arg7_Pro6	Q3UER8	Fgg	50349	50.349	AD_Control.Arg7_Pro6_vs_AD_Control.Unlabeled	AD_Proteinuric.Arg7_Pro6_vs_AD_Proteinuric.Unlabeled	ND_Control.Unlabeled_vs_ND_Proteinuric.Unlabeled	-3.00735	-3.83546	1.51339	2.04565e-05	4.06417e-06	32	0.000802399	0.000137663	32	0.294929	0.0394768	32	-0.828113
Plasma	Arg7_Pro6	Q61646	Hp	38752	38.752	AD_Control.Arg7_Pro6_vs_AD_Control.Unlabeled	AD_Proteinuric.Arg7_Pro6_vs_AD_Proteinuric.Unlabeled	ND_Control.Unlabeled_vs_ND_Proteinuric.Unlabeled	-3.71863	-4.74564	1.3159	0.235016	0.0318773	21	2.91682e-07	7.18533e-08	21	0.000750472	0.000129206	21	-1.02701
Plasma	Arg7_Pro6	Q80YC5	F12	65701	65.701	AD_Control.Arg7_Pro6_vs_AD_Control.Unlabeled	AD_Proteinuric.Arg7_Pro6_vs_AD_Proteinuric.Unlabeled	ND_Control.Unlabeled_vs_ND_Proteinuric.Unlabeled	-3.76149	-3.78672	-0.630373	7.12116e-12	3.69352e-12	10	6.44838e-12	3.378e-12	10	0.001863	0.000309315	10	-0.0252344
Plasma	Arg7_Pro6	Q8BPB5	Efemp1	54953	54.953	AD_Control.Arg7_Pro6_vs_AD_Control.Unlabeled	AD_Proteinuric.Arg7_Pro6_vs_AD_Proteinuric.Unlabeled	ND_Control.Unlabeled_vs_ND_Proteinuric.Unlabeled	-0.369124	-1.02496	0.621802	0.00464373	0.000742699	8	0.00137336	0.000230762	8	0.071304	0.0102192	8	-0.655832
Plasma	Arg7_Pro6	Q8K0E8	Fgb	54753	54.753	AD_Control.Arg7_Pro6_vs_AD_Control.Unlabeled	AD_Proteinuric.Arg7_Pro6_vs_AD_Proteinuric.Unlabeled	ND_Control.Unlabeled_vs_ND_Proteinuric.Unlabeled	-2.71857	-3.22095	1.64973	0.010824	0.00167529	38	0.030379	0.00452311	38	0.189972	0.0260093	38	-0.502381
Plasma	Arg7_Pro6	Q91X72	Hpx	51318	51.318	AD_Control.Arg7_Pro6_vs_AD_Control.Unlabeled	AD_Proteinuric.Arg7_Pro6_vs_AD_Proteinuric.Unlabeled	ND_Control.Unlabeled_vs_ND_Proteinuric.Unlabeled	-3.58129	-3.87874	-0.706951	3.10769e-08	8.71923e-09	26	1.97412e-11	9.36306e-12	26	0.000136659	2.51324e-05	26	-0.29745
Plasma	Arg7_Pro6	Q91Y97	Aldob	39507	39.507	AD_Control.Arg7_Pro6_vs_AD_Control.Unlabeled	AD_Proteinuric.Arg7_Pro6_vs_AD_Proteinuric.Unlabeled	ND_Control.Unlabeled_vs_ND_Proteinuric.Unlabeled	-1.46792	-1.19907	-0.945915	1.37017e-05	2.77866e-06	10	0.00202167	0.000334336	10	0.2927	0.0392011	10	0.268849
Plasma	Arg7_Pro6	Q9DBB9	Cpn2	60479	60.479	AD_Control.Arg7_Pro6_vs_AD_Control.Unlabeled	AD_Proteinuric.Arg7_Pro6_vs_AD_Proteinuric.Unlabeled	ND_Control.Unlabeled_vs_ND_Proteinuric.Unlabeled	-4.06748	-4.4766	-0.266978	3.90443e-15	4.09814e-15	17	8.49688e-12	4.34452e-12	17	0.0473303	0.00690783	17	-0.409115
Plasma	Arg7_Pro6	Q9JHH6	Cpb2	48871	48.871	AD_Control.Arg7_Pro6_vs_AD_Control.Unlabeled	AD_Proteinuric.Arg7_Pro6_vs_AD_Proteinuric.Unlabeled	ND_Control.Unlabeled_vs_ND_Proteinuric.Unlabeled	-5.86787	-6.75827	-0.0715146	1.58144e-07	4.03318e-08	12	1.84061e-10	7.3481e-11	12	0.278403	0.0373929	12	-0.890397
Plasma	Arg7_Pro6	Q9QWK4	Cd5l	38863	38.863	AD_Control.Arg7_Pro6_vs_AD_Control.Unlabeled	AD_Proteinuric.Arg7_Pro6_vs_AD_Proteinuric.Unlabeled	ND_Control.Unlabeled_vs_ND_Proteinuric.Unlabeled	0.338832	0.054843	0.0814533	0.271113	0.0364859	12	0.180234	0.0247555	12	0.249397	0.033713	12	-0.283989
