# Supplementary material for: Diversion of Arginine’s dietary metabolic fate in proteinuric kidney disease
Source: Research Square preprint supplement (doi:10.21203/rs.3.rs-9927381/v1), 2026-06-17
Supplement: Supplementary file 21 [file bd79b3af889f60dae19c36b7.xlsx]

## Sheet: Long_Format
Genes_Unique	Comparison (displayed)	log2_ratio_displayed	p_value
Col11a1	Asp_Proteinuric / Normal_Proteinuric	-0.858785	0.193028
Col12a1	Asp_Proteinuric / Normal_Proteinuric	0.24367	0.279579
Col14a1	Asp_Proteinuric / Normal_Proteinuric	-0.225853	0.00559698
Col15a1	Asp_Proteinuric / Normal_Proteinuric	0.0698319	0.601137
Col16a1	Asp_Proteinuric / Normal_Proteinuric	0.211573	0.1274
Col18a1	Asp_Proteinuric / Normal_Proteinuric	0.339039	0.000107745
Col1a1	Asp_Proteinuric / Normal_Proteinuric	0.0361735	0.898722
Col1a2	Asp_Proteinuric / Normal_Proteinuric	0.153824	0.706176
Col28a1	Asp_Proteinuric / Normal_Proteinuric	0.244322	0.0174015
Col3a1	Asp_Proteinuric / Normal_Proteinuric	-0.261474	0.0405112
Col4a1	Asp_Proteinuric / Normal_Proteinuric	0.544478	0.000845996
Col4a2	Asp_Proteinuric / Normal_Proteinuric	0.425759	0.000623889
Col4a3	Asp_Proteinuric / Normal_Proteinuric	0.162522	0.0923995
Col4a4	Asp_Proteinuric / Normal_Proteinuric	0.118732	0.216745
Col4a5	Asp_Proteinuric / Normal_Proteinuric	0.337713	0.00301148
Col4a6	Asp_Proteinuric / Normal_Proteinuric	0.505631	0.00852828
Col5a1	Asp_Proteinuric / Normal_Proteinuric	-0.00547428	0.847975
Col5a2	Asp_Proteinuric / Normal_Proteinuric	0.140992	0.159029
Col5a3	Asp_Proteinuric / Normal_Proteinuric	0.30628	0.299675
Col6a1	Asp_Proteinuric / Normal_Proteinuric	0.183972	0.0183379
Col6a2	Asp_Proteinuric / Normal_Proteinuric	0.192861	0.019563
Col6a3	Asp_Proteinuric / Normal_Proteinuric	0.207668	0.00425888
Col6a4	Asp_Proteinuric / Normal_Proteinuric	0.251185	0.541929
Col6a5	Asp_Proteinuric / Normal_Proteinuric	-0.129175	0.513026
Col6a6	Asp_Proteinuric / Normal_Proteinuric	0.0791679	0.77248
Col7a1	Asp_Proteinuric / Normal_Proteinuric	0.0642782	0.472751
Col8a1	Asp_Proteinuric / Normal_Proteinuric	0.304953	0.692036
