# Supplementary material for: Diversion of Arginine’s dietary metabolic fate in proteinuric kidney disease
Source: Research Square preprint supplement (doi:10.21203/rs.3.rs-9927381/v1), 2026-06-17
Supplement: Supplementary file 22 [file d30fed129be7e16e483629e8.xlsx]

## Sheet: Sheet1
Metabolite	Metabolite_abbrev	Comparison	log2FC	p_value
Arginine	Arg	A2 vs A1	-0.0125055	0.919316
Arginine	Arg	A3 vs A2	0.397916	0.0727462
Arginine	Arg	A3 vs A1	0.38541	0.0860606
Ornithine	Orn	A2 vs A1	0.139148	0.637237
Ornithine	Orn	A3 vs A2	0.373417	0.173722
Ornithine	Orn	A3 vs A1	0.512565	0.129841
Urea	Urea	A2 vs A1	0.217541	0.252746
Urea	Urea	A3 vs A2	0.0881379	0.641293
Urea	Urea	A3 vs A1	0.305679	0.0797257
Citrulline	Cit	A2 vs A1	0.0481574	0.904303
Citrulline	Cit	A3 vs A2	0.152504	0.685323
Citrulline	Cit	A3 vs A1	0.200661	0.689495
Argininosuccinate	ArgSuc	A2 vs A1	-0.945786	0.478978
Argininosuccinate	ArgSuc	A3 vs A2	1.27786	0.159528
Argininosuccinate	ArgSuc	A3 vs A1	0.332071	0.741318
Glutamate	Glu	A2 vs A1	0.0212602	0.945838
Glutamate	Glu	A3 vs A2	0.269203	0.3465
Glutamate	Glu	A3 vs A1	0.290463	0.250512
Glutamine	Gln	A2 vs A1	-0.258547	0.0943228
Glutamine	Gln	A3 vs A2	0.413547	0.0308848
Glutamine	Gln	A3 vs A1	0.155	0.349778
Aspartate	Asp	A2 vs A1	-0.109679	0.300894
Aspartate	Asp	A3 vs A2	0.308567	0.0289811
Aspartate	Asp	A3 vs A1	0.198888	0.0804319
Proline	Pro	A2 vs A1	0.0578627	0.752302
Proline	Pro	A3 vs A2	-0.102292	0.472955
Proline	Pro	A3 vs A1	-0.044429	0.819503
4-hydroxyproline	4OHPro	A2 vs A1	-1.24713	0.0114259
4-hydroxyproline	4OHPro	A3 vs A2	0.720956	0.142649
4-hydroxyproline	4OHPro	A3 vs A1	-0.526176	0.189703
Agmatine	Agm	A2 vs A1	-2.16186	0.342699
Agmatine	Agm	A3 vs A2	1.14626	0.255795
Agmatine	Agm	A3 vs A1	-1.0156	0.536507
Asymmetric dimethylarginine	ADMA	A2 vs A1	0.191813	0.451472
Asymmetric dimethylarginine	ADMA	A3 vs A2	0.244238	0.413033
Asymmetric dimethylarginine	ADMA	A3 vs A1	0.43605	0.153492
Monomethylarginine	MMA	A2 vs A1	-0.998093	0.273358
Monomethylarginine	MMA	A3 vs A2	0.782478	0.0255052
Monomethylarginine	MMA	A3 vs A1	-0.215615	0.752046
Acetylarginine	AcArg	A2 vs A1	0.0824404	0.811059
Acetylarginine	AcArg	A3 vs A2	0.453851	0.390274
Acetylarginine	AcArg	A3 vs A1	0.536292	0.321655
