# Supplementary material for: Diversion of Arginine’s dietary metabolic fate in proteinuric kidney disease
Source: Research Square preprint supplement (doi:10.21203/rs.3.rs-9927381/v1), 2026-06-17
Supplement: Supplementary file 23 [file d388d45ad51e4113e63cf96c.xlsx]

## Sheet: Kid. Cortex
Group	Organism	Gene	Genes	Uniprot_IDs	Protein_Description	log2FC	Average_Expression	P_Value	Adjusted_P_Value	t	B
Kid. Cortex	Mouse	Rpgr	Rpgr	A0A067XG46;A2ADP2;A2ADP5;Q3UTY5;Q3UWJ5;Q8CDM3;Q9R0X5	Retinitis pigmentosa GTPase regulator;Retinitis pigmentosa GTPase regulator;Retinitis pigmentosa GTPase regulator;Retinitis pigmentosa GTPase regulator;Retinitis pigmentosa GTPase regulator;Retinitis pigmentosa GTPase regulator;X-linked retinitis pigmentosa GTPase regulator	0.149127	8.74439	0.29177	0.52868	1.1286	-5.90095
Kid. Cortex	Mouse	Ighg2b	Ighg2b	A0A075B5P3;A0A0A6YVP0	Immunoglobulin heavy constant gamma 2B (Fragment)	0.687403	12.2666	0.126901	0.336212	1.68181	-5.29498
Kid. Cortex	Mouse	2410002F23Rik	2410002F23Rik	A0A087WSJ7;Q3TE80	RIKEN cDNA 2410002F23 gene	0.677136	8.76138	0.000512116	0.017955	5.27246	0.151799
Kid. Cortex	Mouse	Phf20l1	Phf20l1	A0A2R8VHV1;A0A5S8DHC4;Q8CCJ9	PHD finger protein 20-like protein 1	0.18534	9.31584	0.243644	0.481262	1.24765	-5.85186
Kid. Cortex	Mouse	Ndufa6	Ndufa6	A0A2R8VHX1	NADH:ubiquinone oxidoreductase subunit A6 (Fragment)	-0.414545	12.9537	0.00260173	0.0395145	-4.11896	-1.49399
Kid. Cortex	Mouse	Zfp385a	Zfp385a;Znf385a	A0A2R8VHX5;Q8VD12	Zinc finger protein 385A	1.0434	8.9455	0.261683	0.49922	1.22079	-5.75411
Kid. Cortex	Mouse	Gga1	Gga1	A0A2R8VI72	Golgi associated, gamma adaptin ear containing, ARF binding protein 1	0.0226338	12.5444	0.826174	0.916891	0.226101	-6.60706
Kid. Cortex	Mouse	Cd47	Cd47	A0A2R8VI94	CD47 antigen (Rh-related antigen, integrin-associated signal transducer)	-0.922583	11.4895	0.219116	0.453651	-1.32095	-5.76523
Kid. Cortex	Mouse	Aco2	Aco2	A0A2R8VJW0	Aconitase 2, mitochondrial (Fragment)	-0.0254722	13.4951	0.829934	0.918711	-0.221119	-6.60827
Kid. Cortex	Mouse	Zfp740	Zfp740	A0A2R8VK26	Zinc finger protein 740 (Fragment)	1.00639	12.2013	0.0087199	0.0757766	6.13141	-1.87922
Kid. Cortex	Mouse	Cd47	Cd47	A0A2R8VK70	Leukocyte surface antigen CD47	-0.0704763	12.5676	0.358947	0.592607	-0.966707	-6.14971
Kid. Cortex	Mouse	Tfcp2	Tfcp2	A0A2R8VKI7;Q9ERA0	Transcription factor CP2;Alpha-globin transcription factor CP2	0.11484	10.581	0.241773	0.47947	1.25302	-5.84563
Kid. Cortex	Mouse	Mzt2	Mzt2	A0A2R8VKN7;Q9CQ25	Mitotic spindle organizing protein 2;Mitotic-spindle organizing protein 2	-0.285484	9.66466	0.348443	0.583012	-1.01688	-5.90088
Kid. Cortex	Mouse	Gm28778	Gm28778;Ormdl1	A0A087WSK7;Q921I0	N(6)-L-threonylcarbamoyladenine synthase (Fragment);ORM1-like protein 1	-0.0590452	11.9702	0.716599	0.855235	-0.378046	-6.42858
Kid. Cortex	Mouse	Mb	Mb	A0A2R8W6F8;P04247	Myoglobin	-1.13778	8.93084	0.0116484	0.0892448	-4.40441	-2.22018
Kid. Cortex	Mouse	Gm49496	Gm49496;Gpbp1;Gpbp1	A0A2R8W6M1;D6RCY3;Q6NXH3	Predicted gene, 49496 (Fragment);GC-rich promoter binding protein 1;Vasculin	0.0887788	8.86595	0.5219	0.73479	0.669706	-6.31108
Kid. Cortex	Mouse	Rbx1	Rbx1	A0A2R8W6R3;P62878	Ring-box 1;E3 ubiquitin-protein ligase RBX1	-0.372453	11.672	0.0369668	0.16908	-2.44651	-4.14156
Kid. Cortex	Mouse	Pacsin2	Pacsin2	A0A2R8W6S4	Protein kinase C and casein kinase substrate in neurons 2 (Fragment)	0.69848	8.14536	0.449318	0.675785	0.809144	-5.81262
Kid. Cortex	Mouse	Smagp	Smagp	A0A2R8W734;Q99KC7	Small cell adhesion glycoprotein	-0.0215007	11.951	0.917617	0.960672	-0.106377	-6.62872
Kid. Cortex	Mouse	Cacnb3	Cacnb3	A0A2U3TZ49;D3Z3Z3;P54285	Voltage-dependent L-type calcium channel subunit beta-3	0.251799	8.42075	0.714422	0.854201	0.381113	-6.4273
Kid. Cortex	Mouse	Polr2f	Polr2f	A0A2U3TZ54;P61219	Polymerase (RNA) II (DNA directed) polypeptide F;DNA-directed RNA polymerases I, II, and III subunit RPABC2	-0.0819262	11.5434	0.619719	0.798841	-0.513872	-6.49279
Kid. Cortex	Mouse	Clcn2	Clcn2	A0A338P673;Q9R0A1	Chloride channel protein 2	0.240689	11.0321	0.0172816	0.111913	2.91102	-3.39641
Kid. Cortex	Mouse	Smpd4	Smpd4	A0A338P695	Sphingomyelin phosphodiesterase 4	-0.0877234	9.88579	0.597834	0.785492	-0.549237	-6.41977
Kid. Cortex	Mouse	Yeats2	Yeats2	A0A338P697;Q3TUF7	YEATS domain containing 2 (Fragment);YEATS domain-containing protein 2	-0.0352779	11.2577	0.834901	0.921529	-0.215326	-6.55764
Kid. Cortex	Mouse	Fn1	Fn1	A0A087WSN6	Fibronectin	1.93335	9.45653	0.00675766	0.0668125	3.62248	-2.35047
Kid. Cortex	Mouse	Polr2h	Polr2h	A0A338P6B4;A0A338P6I2;Q923G2	Polymerase (RNA) II (DNA directed) polypeptide H (Fragment);DNA-directed RNA polymerases I, II, and III subunit RPABC3;DNA-directed RNA polymerases I, II, and III subunit RPABC3	0.200682	10.9271	0.101335	0.297528	1.82475	-5.09215
Kid. Cortex	Mouse	Synj1	Synj1	A0A338P6C7	Synaptojanin 1 (Fragment)	0.783619	11.8218	0.0844098	0.267368	1.93925	-4.92439
Kid. Cortex	Mouse	Dlg4	Dlg4	A0A338P6E5;A0A338P6I6;G3UZL5;Q62108	Discs large MAGUK scaffold protein 4;Discs large MAGUK scaffold protein 4;Discs large MAGUK scaffold protein 4;Disks large homolog 4	-0.190592	7.1962	0.477664	0.700511	-0.75006	-6.20543
Kid. Cortex	Mouse	Osbpl11	Osbpl11	A0A338P6F2;G5E8A0;Q8CI95	Oxysterol-binding protein;Oxysterol-binding protein;Oxysterol-binding protein-related protein 11	-0.0683915	11.514	0.554642	0.757742	-0.613641	-6.43349
Kid. Cortex	Mouse	Hmga1	Hmga1	A0A338P6G6;A0A384DV79	High mobility group AT-hook 1	0.367552	13.6876	0.119472	0.32627	1.72038	-5.24103
Kid. Cortex	Mouse	Ttc3	Ttc3	A0A338P6H3;D6RD03;D6RDD2;D6RFU5;D6RHT6;G5E8T2;G5E8U3;O88196	Tetratricopeptide repeat domain 3;RING-type E3 ubiquitin transferase (Fragment);RING-type E3 ubiquitin transferase (Fragment);RING-type E3 ubiquitin transferase (Fragment);RING-type E3 ubiquitin transferase (Fragment);RING-type E3 ubiquitin transferase;Tetratricopeptide repeat domain 3;E3 ubiquitin-protein ligase TTC3	0.0485986	9.57857	0.878008	0.94273	0.159199	-6.4935
Kid. Cortex	Mouse	Gm56451	Gm56451	A0A338P6I9	Predicted gene, 56451	0.0187897	10.8901	0.902191	0.953715	0.126403	-6.62618
Kid. Cortex	Mouse	Dlg2	Dlg2	A0A338P6J0;A0A571BEK3;A0A571BEZ4;D3YUZ8;E9Q2L2;Q91XM9	Discs large MAGUK scaffold protein 2;Discs large MAGUK scaffold protein 2;Discs large MAGUK scaffold protein 2;Discs large MAGUK scaffold protein 2;Discs large MAGUK scaffold protein 2;Disks large homolog 2	-0.676152	10.1546	0.18637	0.415548	-1.43046	-5.62977
Kid. Cortex	Mouse	Sec22a	Sec22a	A0A338P6J4;B7ZNW3;Q8BH47	SEC22 homolog A, vesicle trafficking protein;SEC22 homolog A, vesicle trafficking protein;Vesicle-trafficking protein SEC22a	0.233766	11.2671	0.182173	0.410476	1.44567	-5.61041
Kid. Cortex	Mouse	Myh11	Myh11	A0A338P6K2	Myosin, heavy polypeptide 11, smooth muscle	0.423189	14.6143	0.0206001	0.123251	2.80331	-3.57002
Kid. Cortex	Mouse	Stat1	Stat1	A0A087WSP5;Q8C3V4	Signal transducer and activator of transcription	0.645248	13.0598	1.08276e-05	0.00342591	8.74138	3.94571
Kid. Cortex	Mouse	Qser1	Qser1	A0A338P6K9	Glutamine and serine-rich protein 1	0.170376	8.85558	0.221463	0.455987	1.31364	-5.77401
Kid. Cortex	Mouse	Crybg3	Crybg3	A0A338P6N4	Beta-gamma crystallin domain containing 3	0.0300808	9.73239	0.736692	0.867545	0.346827	-6.56964
Kid. Cortex	Mouse	Lztr1	Lztr1	A0A338P6P0;A0A338P6Y5;Q9CQ33	Leucine-zipper-like transcriptional regulator, 1;Leucine-zipper-like transcriptional regulator, 1 (Fragment);Leucine-zipper-like transcriptional regulator 1	0.0400328	10.0712	0.776925	0.890223	0.291973	-6.58856
Kid. Cortex	Mouse	Acap2	Acap2	A0A338P6P6;D4AFX6;Q6ZQK5	Arf-GAP with coiled-coil, ANK repeat and PH domain-containing protein;Arf-GAP with coiled-coil, ANK repeat and PH domain-containing protein;Arf-GAP with coiled-coil, ANK repeat and PH domain-containing protein 2	0.164005	12.0741	0.0395256	0.174577	2.4057	-4.20622
Kid. Cortex	Mouse	Ssbp2	Ssbp2	A0A338P6Q9;Q9CYZ8	Single-stranded DNA binding protein 2 (Fragment);Single-stranded DNA-binding protein 2	0.373514	8.85892	0.0941536	0.285244	1.8987	-4.94702
Kid. Cortex	Mouse	Gm49601	Gm49601;Septin5;Septin5;Septin5	A0A338P6R8;A0A338P769;B7ZNM7;Q9Z2Q6	Septin;Septin;Septin;Septin-5	0.504086	10.0522	0.00622019	0.0642054	3.54951	-2.37474
Kid. Cortex	Mouse	Abi3bp	Abi3bp	A0A338P6S8;Q59IW5;Q59IW6;Q59IW7;Q59IW9	ABI family member 3 binding protein	0.398284	10.6999	0.0133938	0.0972988	3.06813	-3.14328
Kid. Cortex	Mouse	Parl	Parl	A0A338P6U4;Q5XJY4	Presenilin associated, rhomboid-like;Presenilins-associated rhomboid-like protein, mitochondrial	-0.218685	13.0186	0.00570423	0.0612242	-3.60488	-2.2875
Kid. Cortex	Mouse	Arid1b	Arid1b	A0A338P6U8;A0A8Q0PK87;E9Q4N7;E9Q6R4	AT rich interactive domain 1B (SWI-like);AT rich interactive domain 1B (SWI-like);AT-rich interactive domain-containing protein 1B;AT rich interactive domain 1B (SWI-like)	0.0932376	12.0313	0.34669	0.582298	0.992922	-6.12441
Kid. Cortex	Mouse	Rbbp6	Rbbp6	A0A338P6W1	Retinoblastoma binding protein 6, ubiquitin ligase (Fragment)	0.312031	11.1301	0.0326862	0.159022	2.52151	-4.0222
Kid. Cortex	Mouse	Ndufs1	Ndufs1	A0A087WSU3	NADH:ubiquinone oxidoreductase core subunit S1 (Fragment)	-0.0359421	10.9772	0.82838	0.918149	-0.225035	-6.47944
Kid. Cortex	Mouse	Cryzl1	Cryzl1	A0A338P6Y1	Crystallin, zeta (quinone reductase)-like 1 (Fragment)	0.119231	9.87543	0.640494	0.812316	0.485269	-6.45509
Kid. Cortex	Mouse	2510009E07Rik	2510009E07Rik;	A0A338P700;Q6GQU0	RIKEN cDNA 2510009E07 gene;UPF0524 protein C3orf70 homolog	-1.49664	9.88541	0.0512625	0.201753	-2.75201	-3.75826
Kid. Cortex	Mouse	Rnaset2b	Rnaset2b;Rnaset2b;Rnaset2a;Rnaset2b	A0A338P711;A0A338P7E3;C0HKG5;C0HKG6	Ribonuclease T2B (Fragment);Ribonuclease T2B;Ribonuclease T2-A;Ribonuclease T2-B	-0.0447638	12.367	0.732796	0.865649	-0.352198	-6.56762
Kid. Cortex	Mouse	Med15	Med15	A0A338P730;E9Q7C1;Q3TE00;Q924H2	Mediator of RNA polymerase II transcription subunit 15	0.160543	10.1713	0.240918	0.478473	1.25548	-5.84276
Kid. Cortex	Mouse	Fgf12	Fgf12	A0A338P764;P61329	Fibroblast growth factor (Fragment);Fibroblast growth factor 12	0.0841018	9.38327	0.713545	0.853836	0.388631	-6.24747
Kid. Cortex	Mouse	Atp5o	Atp5o	A0A338P776	ATP synthase subunit O, mitochondrial (Fragment)	-0.860342	10.8611	0.297006	0.533401	-1.16382	-5.63979
Kid. Cortex	Mouse	Ube2l3	Ube2l3	A0A338P786;P68037	Ubiquitin-conjugating enzyme E2L 3 (Fragment);Ubiquitin-conjugating enzyme E2 L3	-0.0360255	14.2231	0.561802	0.763842	-0.602359	-6.44069
Kid. Cortex	Mouse	Wdr53	Wdr53	A0A338P796;Q9DB94	WD repeat domain 53 (Fragment);WD repeat-containing protein 53	-0.267769	9.51052	0.170957	0.39577	-1.48788	-5.55606
Kid. Cortex	Mouse	Dynlt1a	Dynlt1a;Dynlt1	A0A338P7B7;P51807	Dynein light chain Tctex-type 1A;Dynein light chain Tctex-type 1	0.0248845	11.9083	0.843868	0.92543	0.202712	-6.6125
Kid. Cortex	Mouse	Tmem181a	Tmem181a	A0A338P7C9;Q3U3W2	Transmembrane protein 181A	0.730268	10.7219	0.00302724	0.0426814	4.79122	-1.23062
Kid. Cortex	Mouse	Nab1	Nab1	A0A087WSU4;Q61122	Ngfi-A binding protein 1;NGFI-A-binding protein 1	0.292005	10.7017	0.0468944	0.192056	2.30135	-4.37056
Kid. Cortex	Mouse	Riok2	Riok2	A0A338P7E9;Q9CQS5	non-specific serine/threonine protein kinase;Serine/threonine-protein kinase RIO2	0.177968	9.23746	0.413994	0.644104	0.856402	-6.25008
Kid. Cortex	Mouse	Atp5o	Atp5o	A0A338P7G3	ATP synthase peripheral stalk subunit OSCP (Fragment)	0.281837	13.4633	0.266197	0.504258	1.18544	-5.92265
Kid. Cortex	Mouse	Ncbp2	Ncbp2	A0A338P7L9;Q9CQ49	Nuclear cap-binding protein subunit 2	0.0962356	12.1937	0.316524	0.553786	1.06055	-6.05666
Kid. Cortex	Mouse	Ift140	Ift140	A0A3B2W3F6;E9PY46	Intraflagellar transport 140;Intraflagellar transport protein 140 homolog	0.0705395	10.773	0.387244	0.618747	0.908598	-6.20384
Kid. Cortex	Mouse	Hmgn1	Hmgn1	A0A3B2W3M7;P18608	High mobility group nucleosomal binding domain 1;Non-histone chromosomal protein HMG-14	0.27665	9.91173	0.0832573	0.265167	1.94781	-4.91167
Kid. Cortex	Mouse	Brpf3	Brpf3	A0A3B2W3T2;A0A3B2WD39;B2KF05	Bromodomain and PHD finger containing, 3;Bromodomain and PHD finger containing, 3;Bromodomain and PHD finger-containing protein 3	0.321363	9.15302	0.061095	0.222535	2.13924	-4.62218
Kid. Cortex	Mouse	Snrpc	Snrpc	A0A3B2W450;A0A3B2WCR6;Q62241	U1 small nuclear ribonucleoprotein C	0.0744716	12.9443	0.25075	0.489032	1.22756	-5.875
Kid. Cortex	Mouse	Sod2	Sod2	A0A3B2W479	Superoxide dismutase [Mn], mitochondrial (Fragment)	0.101701	11.3095	0.807068	0.906347	0.25151	-6.60047
Kid. Cortex	Mouse	Yju2	Yju2	A0A3B2W7X7;Q9D6J3	Splicing factor YJU2	0.0786257	10.4959	0.270845	0.507655	1.17315	-5.93632
Kid. Cortex	Mouse	Gm49804	Gm49804	A0A3B2W864	diphosphoinositol-polyphosphate diphosphatase	0.0520878	15.2838	0.65	0.817192	0.469322	-6.51607
Kid. Cortex	Mouse	Mterf1b	Mterf1b;Mterf1b;Mterf1a	A0A096P6K7;B9EJ57;Q8CHZ9	Mitochondrial transcription termination factor 1b;Transcription termination factor 1b, mitochondrial;Transcription termination factor 1a, mitochondrial	-0.0648139	9.51531	0.735553	0.867072	-0.348396	-6.56905
Kid. Cortex	Mouse	Polh	Polh	A0A3B2WAL6;Q9JJN0	Polymerase (DNA directed), eta (RAD 30 related);DNA polymerase eta	-1.6548	11.3875	0.0520823	0.203859	-2.23717	-4.47078
Kid. Cortex	Mouse	Anks1	Anks1;Anks1a;Anks1	A0A3B2WAQ7;P59672;Q3UHP6	Ankyrin repeat and SAM domain containing 1;Ankyrin repeat and SAM domain-containing protein 1A;Ankyrin repeat and SAM domain containing 1	-0.062038	12.1325	0.347655	0.582497	-0.990834	-6.12644
Kid. Cortex	Mouse	Nfkbie	Nfkbie	A0A3B2WAY2;O54910	Nuclear factor of kappa light polypeptide gene enhancer in B cells inhibitor, epsilon;NF-kappa-B inhibitor epsilon	0.625879	8.95506	0.127592	0.337054	1.82493	-4.69726
Kid. Cortex	Mouse	Polr2m	Polr2m	A0A3B2WBC6	Polymerase (RNA) II (DNA directed) polypeptide M	0.265477	11.683	0.238256	0.475165	1.26321	-5.83376
Kid. Cortex	Mouse	Tjp2	Tjp2	A0A3B2WBH9;A0A3B2WCN9;Q9Z0U1	Tight junction protein 2;Tight junction protein 2;Tight junction protein ZO-2	0.132581	13.1121	0.0887261	0.274829	1.90812	-4.97041
Kid. Cortex	Mouse	Cdc42ep3	Cdc42ep3	A0A3B2WBL9;Q9CQC5	CDC42 effector protein (Rho GTPase binding) 3 (Fragment);Cdc42 effector protein 3	0.337478	10.0849	0.0620533	0.224537	2.12967	-4.63687
Kid. Cortex	Mouse	Khsrp	Khsrp	A0A3B2WCD8;Q3U0V1	KH-type splicing regulatory protein;Far upstream element-binding protein 2	0.0249393	14.584	0.736262	0.86754	0.347419	-6.56942
Kid. Cortex	Mouse	Ranbp3	Ranbp3	A0A3B2WCL5;Q9CT10	RAN binding protein 3;Ran-binding protein 3	0.336601	12.206	0.00171968	0.0314593	4.4002	-1.07444
Kid. Cortex	Mouse	Ralbp1	Ralbp1	A0A3B2WCS4;Q62172	RalA binding protein 1;RalA-binding protein 1	-0.0251321	11.5459	0.665898	0.827125	-0.446338	-6.5273
Kid. Cortex	Mouse	Epb41l3	Epb41l3	A0A3B2WD96	Erythrocyte membrane protein band 4.1 like 3	-0.184271	9.22811	0.783853	0.894676	-0.28263	-6.59146
Kid. Cortex	Mouse	Gcdh	Gcdh	A0A0A0MQ68;Q60759	Glutaryl-Coenzyme A dehydrogenase;Glutaryl-CoA dehydrogenase, mitochondrial	-0.285289	15.8183	0.00795073	0.0715988	-3.39378	-2.6216
Kid. Cortex	Mouse	Lclat1	Lclat1	A0A3B2WDB3;Q3UN02	Lysocardiolipin acyltransferase 1 (Fragment);Lysocardiolipin acyltransferase 1	0.0137213	13.4134	0.908877	0.956866	0.117717	-6.62733
Kid. Cortex	Mouse	Kctd20	Kctd20	A0A3F2YNM3;A0A3F2YNM8;B2KF10;B2KF11;Q8CDD8	Potassium channel tetramerisation domain containing 20;Potassium channel tetramerisation domain containing 20;Potassium channel tetramerisation domain containing 20 (Fragment);Potassium channel tetramerisation domain containing 20 (Fragment);BTB/POZ domain-containing protein KCTD20	0.0103113	9.37519	0.924408	0.963637	0.0975756	-6.6297
Kid. Cortex	Mouse	Tead3	Tead3	A0A3F2YNR7;F6TTJ9;F8VPU0;P70210	Transcriptional enhancer factor TEF-5	0.439281	10.2674	0.0725665	0.245608	2.26854	-4.30479
Kid. Cortex	Mouse	Gramd1c	Gramd1c	A0A3P9AQ15;Q8CI52	GRAM domain containing 1C;Protein Aster-C	0.00264403	10.6001	0.983771	0.992844	0.0216411	-6.10785
Kid. Cortex	Mouse	Bin1	Bin1	A0A3Q4EBK4;O08539;Q6P1B9	Bridging integrator 1;Myc box-dependent-interacting protein 1;Bin1 protein	-0.0183605	12.7304	0.820393	0.912921	-0.233771	-6.60514
Kid. Cortex	Mouse	Pi16	Pi16	A0A3Q4EC30;D3Z6T6;Q9ET66	Peptidase inhibitor 16 (Fragment);Peptidase inhibitor 16;Peptidase inhibitor 16	0.0730169	10.6651	0.816801	0.911157	0.238546	-6.60392
Kid. Cortex	Mouse	Commd10	Commd10	A0A3Q4EC50;Q8JZY2	COMM domain containing 10;COMM domain-containing protein 10	-0.177821	12.5764	0.00818417	0.0731053	-3.37554	-2.65065
Kid. Cortex	Mouse	Ttc39c	Ttc39c	A0A3Q4EGC9;G3X8X1;Q8VE09	Tetratricopeptide repeat domain 39C;Tetratricopeptide repeat domain 39C;Tetratricopeptide repeat protein 39C	-0.134356	11.8168	0.694365	0.843809	-0.405804	-6.54578
Kid. Cortex	Mouse	Ltbp1	Ltbp1	A0A3Q4EGK3;Q8CG19	Latent transforming growth factor beta binding protein 1;Latent-transforming growth factor beta-binding protein 1	0.499782	11.9267	0.167203	0.390975	1.50254	-5.53695
Kid. Cortex	Mouse	Gfer	Gfer	A0A3Q4EGL6;P56213	Sulfhydryl oxidase;FAD-linked sulfhydryl oxidase ALR	-0.600674	13.4967	0.140779	0.358169	-1.61494	-5.38698
Kid. Cortex	Mouse	Kmt2d	Kmt2d	A0A0A0MQ73;Q6PDK2	[histone H3]-lysine(4) N-methyltransferase;Histone-lysine N-methyltransferase 2D	0.216366	9.41897	0.0285075	0.147027	2.60489	-3.88891
Kid. Cortex	Mouse	Ss18	Ss18	A0A3Q4EGQ6;A0A3Q4EI07;Q62280;Q8BJJ6;Q8BKL1;Q8VHA8	SS18, nBAF chromatin remodeling complex subunit;SS18, nBAF chromatin remodeling complex subunit;Protein SSXT;SS18, nBAF chromatin remodeling complex subunit;SS18, nBAF chromatin remodeling complex subunit;SS18, nBAF chromatin remodeling complex subunit	0.0898039	10.7956	0.732489	0.865649	0.352622	-6.56746
Kid. Cortex	Mouse	Map4k3	Map4k3	A0A3Q4EGQ9;E9QNE9;Q99JP0	Mitogen-activated protein kinase kinase kinase kinase 3	-0.0470614	11.2562	0.479419	0.701573	-0.737817	-6.34637
Kid. Cortex	Mouse	Srsf7	Srsf7	A0A3Q4EH04;A0A3Q4L335;A0A3Q4L393;Q8BL97	Serine and arginine-rich splicing factor 7;Serine and arginine-rich splicing factor 7;Serine and arginine-rich splicing factor 7;Serine/arginine-rich splicing factor 7	0.03396	14.769	0.671691	0.829717	0.438027	-6.53123
Kid. Cortex	Mouse	Fez2	Fez2	A0A3Q4EH67;D3Z6D5;Q3TN06;Q6TYB5	Fasciculation and elongation protein zeta 2 (zygin II);Fasciculation and elongation protein zeta 2 (zygin II);Fasciculation and elongation protein zeta 2 (zygin II);Fasciculation and elongation protein zeta-2	0.0748796	10.2096	0.263596	0.501265	1.19239	-5.91487
Kid. Cortex	Mouse	Ammecr1l	Ammecr1l	A0A3Q4EHL9;Q8JZZ6	AMME chromosomal region gene 1-like;AMMECR1-like protein	0.232004	9.46569	0.0970389	0.290529	1.85201	-5.05261
Kid. Cortex	Mouse	BC004004	BC004004;BC004004;BC004004;	A0A3Q4EI31;A0A3Q4L2X7;A0A3Q4L309;Q99KU6	cDNA sequence BC004004;cDNA sequence BC004004;cDNA sequence BC004004;Bombesin receptor-activated protein C6orf89 homolog	-0.0488592	11.3198	0.709278	0.851322	-0.38486	-6.55467
Kid. Cortex	Mouse	Nubp2	Nubp2	A0A3Q4L2S1;Q9R061	Nucleotide binding protein 2;Cytosolic Fe-S cluster assembly factor NUBP2	0.0374926	12.085	0.616292	0.796842	0.518982	-6.48999
Kid. Cortex	Mouse	Cdo1	Cdo1	A0A3Q4L347;P60334	Cysteine dioxygenase;Cysteine dioxygenase type 1	0.439208	11.021	0.199126	0.430536	1.38598	-5.68563
Kid. Cortex	Mouse	Flrt1	Flrt1	A0A452J8F8;Q6RKD8	Fibronectin leucine rich transmembrane protein 1;Leucine-rich repeat transmembrane protein FLRT1	-0.755812	8.49689	0.0395791	0.174724	-2.62009	-3.82536
Kid. Cortex	Mouse	Yif1a	Yif1a	A0A494B8Y8;Q91XB7	Protein YIF1;Protein YIF1A	0.0019687	10.861	0.992094	0.996801	0.0101872	-6.63484
Kid. Cortex	Mouse	Prrc2c	Prrc2c	A0A0A0MQ79;Q3TLH4;S4R2J9	Proline-rich coiled-coil 2C;Protein PRRC2C;Proline-rich coiled-coil 2C	0.142667	12.359	0.0632136	0.226499	2.11827	-4.65434
Kid. Cortex	Mouse	Papss2	Papss2	A0A494B923;A0A494BB18	3'-phosphoadenosine 5'-phosphosulfate synthase 2	0.257338	10.8871	0.545935	0.753259	0.627475	-6.42451
Kid. Cortex	Mouse	Pias2	Pias2;Pias3;Pias3;Pias2;Pias2;Pias3;Pias3;Pias2	A0A494B929;E0CZ31;E0CZH5;F8WHS8;G3UWE3;H3BJ41;O54714;Q8C5D8	Protein inhibitor of activated STAT 2;Protein inhibitor of activated STAT 3;Protein inhibitor of activated STAT 3 (Fragment);Protein inhibitor of activated STAT 2;Protein inhibitor of activated STAT 2;Protein inhibitor of activated STAT 3;E3 SUMO-protein ligase PIAS3;E3 SUMO-protein ligase PIAS2	-0.0669355	8.4901	0.64361	0.814101	-0.478637	-6.51137
Kid. Cortex	Mouse	Ppp1r14b	Ppp1r14b	A0A494B933;A0A494B9R1;A0A494BB30;Q62084	Protein phosphatase 1 regulatory subunit 14 (Fragment);Protein phosphatase 1 regulatory subunit 14 (Fragment);Protein phosphatase 1 regulatory subunit 14;Protein phosphatase 1 regulatory subunit 14B	1.01162	8.9503	0.00129438	0.0276673	4.59781	-0.786489
Kid. Cortex	Mouse	Pknox1	Pknox1;Pknox1;Pknox1;Pknox1;Pknox1;Pknox2	A0A494B958;A0A494B9U0;A0A494BA52;A0A494BB27;O70477;Q8BG99	Pbx/knotted 1 homeobox;Pbx/knotted 1 homeobox;Pbx/knotted 1 homeobox;Pbx/knotted 1 homeobox;Homeobox protein PKNOX1;Homeobox protein PKNOX2	-0.0163105	9.67997	0.956304	0.979005	-0.0575923	-6.33203
Kid. Cortex	Mouse	Pgap6	Pgap6	A0A494B963;A0A494B9Q3;Q9ESN3	Post-glycosylphosphatidylinositol attachment to proteins 6;Post-glycosylphosphatidylinositol attachment to proteins 6;Post-GPI attachment to proteins factor 6	-0.134562	9.35166	0.441293	0.668249	-0.810133	-6.20407
Kid. Cortex	Mouse	Gm45928	Gm45928;Pold4;Pold4	A0A494B974;A0A494BBE1;Q9CWP8	Predicted gene, 45928;Polymerase (DNA-directed), delta 4;DNA polymerase delta subunit 4	0.460806	10.0286	0.0160522	0.107373	2.9564	-3.32326
Kid. Cortex	Mouse	Sdhaf2	Sdhaf2	A0A494B9B9;Q8C6I2	Succinate dehydrogenase assembly factor 2, mitochondrial;Succinate dehydrogenase assembly factor 2, mitochondrial	-0.0401636	11.5852	0.708934	0.851214	-0.38534	-6.55447
Kid. Cortex	Mouse	Rnaseh2c	Rnaseh2c	A0A494B9C7;A0A494BBB6;Q9CQ18	Ribonuclease H2, subunit C (Fragment);Ribonuclease H2, subunit C (Fragment);Ribonuclease H2 subunit C	0.294754	10.3797	0.148831	0.367973	1.57882	-5.43583
Kid. Cortex	Mouse	Naa40	Naa40	A0A494B9D7;Q8VE10	N-alpha-acetyltransferase 40	0.180821	10.9893	0.232815	0.469025	1.27921	-5.81497
Kid. Cortex	Mouse	Mrpl49	Mrpl49	A0A494B9G1	39S ribosomal protein L49, mitochondrial (Fragment)	-0.137576	11.7408	0.0611264	0.222535	-2.13893	-4.62267
Kid. Cortex	Mouse	Ighg1	Ighg1	A0A075B5P4;A0A0A6YWR2;P01868;P01869	Immunoglobulin heavy constant gamma 1 (G1m marker) (Fragment);Immunoglobulin heavy constant gamma 1 (G1m marker) (Fragment);Ig gamma-1 chain C region secreted form;Ig gamma-1 chain C region, membrane-bound form	0.111651	11.3245	0.822893	0.914635	0.230452	-6.60598
Kid. Cortex	Mouse	Spata5	Spata5	A0A0A0MQ80;Q3UMC0	vesicle-fusing ATPase;Ribosome biogenesis protein SPATA5	-0.00707693	11.8723	0.914529	0.959065	-0.110381	-6.62825
Kid. Cortex	Mouse	Sil1	Sil1	A0A494B9H1;Q9EPK6	Endoplasmic reticulum chaperone SIL1 homolog (S. cerevisiae);Nucleotide exchange factor SIL1	0.0396256	11.203	0.730248	0.864059	0.355715	-6.56628
Kid. Cortex	Mouse	Phf1	Phf1	A0A494B9I3;A0A494BBE6;Q9Z1B8	PHD finger protein 1	0.28202	10.3243	0.401149	0.631739	0.881161	-6.22843
Kid. Cortex	Mouse	Add3	Add3	A0A494B9K4	Adducin 3 (gamma)	0.0698177	10.3522	0.577614	0.77299	0.577727	-6.45596
Kid. Cortex	Mouse	Akap8l	Akap8l	A0A494B9L0;Q5RL57;Q9R0L7	A kinase (PRKA) anchor protein 8-like;A kinase (PRKA) anchor protein 8-like;A-kinase anchor protein 8-like	0.0849421	10.3698	0.384411	0.615665	0.914275	-6.19867
Kid. Cortex	Mouse	Trim36	Trim36	A0A494B9M7;E9Q3A0;Q80WG7	Tripartite motif-containing 36 (Fragment);Tripartite motif-containing 36;E3 ubiquitin-protein ligase Trim36	0.298137	9.17983	0.287907	0.525975	1.43427	-4.96218
Kid. Cortex	Mouse	Dnajc18	Dnajc18	A0A494B9N3;A0A494BB56;Q9CZJ9	DnaJ heat shock protein family (Hsp40) member C18 (Fragment);DnaJ heat shock protein family (Hsp40) member C18 (Fragment);DnaJ homolog subfamily C member 18	-0.482299	8.55021	0.241617	0.479308	-1.29902	-5.54502
Kid. Cortex	Mouse	Nme4	Nme4	A0A494B9P5;A0A494BA70;A0A494BA94;Q9WV84	Nucleoside diphosphate kinase (Fragment);Nucleoside diphosphate kinase (Fragment);Nucleoside diphosphate kinase;Nucleoside diphosphate kinase, mitochondrial	-0.0868768	9.90769	0.674016	0.830746	-0.4347	-6.53278
Kid. Cortex	Mouse	Lcor	Lcor	A0A494B9R4;Q6ZPI3	Ligand dependent nuclear receptor corepressor (Fragment);Ligand-dependent corepressor	1.12399	11.3262	0.680908	0.835337	0.442637	-5.99452
Kid. Cortex	Mouse	Wdr4	Wdr4	A0A494B9R5;E9Q156;Q9EP82	WD repeat domain 4 (Fragment);tRNA (guanine-N(7)-)-methyltransferase non-catalytic subunit WDR4;tRNA (guanine-N(7)-)-methyltransferase non-catalytic subunit WDR4	0.0585001	10.4174	0.698883	0.847031	0.399438	-6.54853
Kid. Cortex	Mouse	Ptar1	Ptar1	A0A494B9V8	Protein prenyltransferase alpha subunit repeat containing 1	-0.11865	10.7864	0.207439	0.441316	-1.35829	-5.71983
Kid. Cortex	Mouse	Map3k6	Map3k6	A0A0A0MQ82;Q9WTR2	mitogen-activated protein kinase kinase kinase;Mitogen-activated protein kinase kinase kinase 6	0.0107406	12.6685	0.940568	0.971638	0.0766639	-6.63169
Kid. Cortex	Mouse	Nt5c2	Nt5c2	A0A494B9X3;A0A494BBP6;E9Q9M1;Q3V1L4	5'-nucleotidase, cytosolic II;5'-nucleotidase, cytosolic II;5'-nucleotidase, cytosolic II;Cytosolic purine 5'-nucleotidase	0.0140895	12.9215	0.893203	0.948743	0.138098	-6.62449
Kid. Cortex	Mouse	Zfpl1	Zfpl1	A0A494B9Y9;Q9DB43	Zinc finger protein-like 1	0.0595662	12.0299	0.642925	0.814098	0.479638	-6.51086
Kid. Cortex	Mouse	Fau	Fau	A0A494B9Z0;A0A494BBA8;P62862	40S ribosomal protein S30;Finkel-Biskis-Reilly murine sarcoma virus (FBR-MuSV) ubiquitously expressed (fox derived);FAU ubiquitin-like and ribosomal protein S30	-0.143245	14.7838	0.457814	0.682918	-0.775715	-6.31695
Kid. Cortex	Mouse	Tbc1d12	Tbc1d12	A0A494BA22;E9QQ68;Q6A039	TBC1D12: TBC1 domain family, member 12;TBC1D12: TBC1 domain family, member 12;TBC1 domain family member 12	0.0539161	9.79564	0.896187	0.949907	0.134213	-6.62507
Kid. Cortex	Mouse	Slc4a9	Slc4a9	A0A494BA31;A0A494BAI0;A0A494BAK5;A0A494BBC3;E9PUP3;Q8BUG8	Anion exchange protein;Anion exchange protein;Anion exchange protein (Fragment);Anion exchange protein;Anion exchange protein;Solute carrier family 4, sodium bicarbonate cotransporter, member 9	-1.17166	8.30744	0.000133235	0.0113381	-6.34754	1.50291
Kid. Cortex	Mouse	Rela	Rela	A0A494BA44;Q04207	V-rel reticuloendotheliosis viral oncogene homolog A (avian);Transcription factor p65	0.291718	12.2564	0.0181881	0.114676	2.87963	-3.44702
Kid. Cortex	Mouse	Ostf1	Ostf1	A0A494BA97;Q62422	Osteoclast stimulating factor 1;Osteoclast-stimulating factor 1	0.216206	14.1803	0.00970368	0.0803525	3.26861	-2.8214
Kid. Cortex	Mouse	Ndfip1	Ndfip1	A0A494BAA4;A0A494BAK0;Q8R0W6	Nedd4 family interacting protein 1;Nedd4 family interacting protein 1;NEDD4 family-interacting protein 1	-0.158118	10.1753	0.229002	0.463598	-1.29062	-5.80148
Kid. Cortex	Mouse	Shoc2	Shoc2	A0A494BAG1;O88520	Shoc2, leucine rich repeat scaffold protein (Fragment);Leucine-rich repeat protein SHOC-2	0.08129	11.5928	0.220248	0.454907	1.31742	-5.76948
Kid. Cortex	Mouse	Nedd4l	Nedd4l	A0A494BAG2;A0A494BAX0	HECT-type E3 ubiquitin transferase	-0.0110419	12.4626	0.88509	0.946296	-0.148672	-6.62284
Kid. Cortex	Mouse	Havcr1	Havcr1	A0A0A0MQ86;Q3V033;Q5QNS5	Hepatitis A virus cellular receptor 1;Hepatitis A virus cellular receptor 1;Hepatitis A virus cellular receptor 1 homolog		10.8222
Kid. Cortex	Mouse	Pde9a	Pde9a	A0A494BAI4;A0A494BAJ0;D3YTQ4;O70628	Phosphodiesterase 9A;Phosphodiesterase (Fragment);Phosphodiesterase;High affinity cGMP-specific 3',5'-cyclic phosphodiesterase 9A	0.402967	9.13391	0.204847	0.438346	1.39788	-5.54714
Kid. Cortex	Mouse	Fech	Fech	A0A494BAI5;P22315	Ferrochelatase;Ferrochelatase, mitochondrial	-0.239145	14.0516	0.0034715	0.0467328	-3.92738	-1.78594
Kid. Cortex	Mouse	Ccs	Ccs	A0A494BAJ5;A0A494BB58;A0A494BBF1;Q9WU84	Superoxide dismutase [Cu-Zn];Superoxide dismutase copper chaperone;Superoxide dismutase copper chaperone;Copper chaperone for superoxide dismutase	-0.0246637	13.7079	0.799773	0.903307	-0.261258	-6.59776
Kid. Cortex	Mouse	Arl3	Arl3	A0A494BAJ6;Q9WUL7	ADP-ribosylation factor-like 3;ADP-ribosylation factor-like protein 3	-0.064499	13.1816	0.30849	0.545091	-1.07939	-6.03717
Kid. Cortex	Mouse	Ergic1	Ergic1	A0A494BAK4;A0A494BAW5;F6SLP4;Q9DC16	Endoplasmic reticulum-Golgi intermediate compartment protein;Endoplasmic reticulum-Golgi intermediate compartment protein;Endoplasmic reticulum-Golgi intermediate compartment protein;Endoplasmic reticulum-Golgi intermediate compartment protein 1	0.204375	13.5536	0.283157	0.521703	1.14141	-5.97116
Kid. Cortex	Mouse	Rcl1	Rcl1	A0A494BAM2;Q9JJT0	RNA terminal phosphate cyclase-like 1;RNA 3'-terminal phosphate cyclase-like protein	-0.179527	9.62	0.740349	0.869213	-0.343121	-6.51865
Kid. Cortex	Mouse	Pstpip2	Pstpip2	A0A494BAM6;Q99M15	Proline-serine-threonine phosphatase-interacting protein 2	0.475866	10.0519	0.00987141	0.0811772	3.25789	-2.83856
Kid. Cortex	Mouse	Efemp2	Efemp2	A0A494BAR1;A0A494BBF0;E9Q3N9;G5E8D6;Q9WVJ9	Epidermal growth factor-containing fibulin-like extracellular matrix protein 2;Epidermal growth factor-containing fibulin-like extracellular matrix protein 2;Epidermal growth factor-containing fibulin-like extracellular matrix protein 2;Epidermal growth factor-containing fibulin-like extracellular matrix protein 2;EGF-containing fibulin-like extracellular matrix protein 2	0.566178	10.9898	0.0284031	0.146647	2.66904	-3.79196
Kid. Cortex	Mouse	Cuedc2	Cuedc2	A0A494BAT2;A0A494BB93;Q9CXX9	CUE domain containing 2;CUE domain containing 2;CUE domain-containing protein 2	0.474197	9.82891	0.214111	0.448404	1.33674	-5.74613
Kid. Cortex	Mouse	Pglyrp2	Pglyrp2	A0A494BB01;Q8VCS0	Peptidoglycan recognition protein 2;N-acetylmuramoyl-L-alanine amidase	0.380474	10.4378	0.00183285	0.0325913	4.3564	-1.13904
Kid. Cortex	Mouse	Sos2	Sos2	A0A0A0MQ87;Q02384;S4R2C4	SOS Ras/Rho guanine nucleotide exchange factor 2;Son of sevenless homolog 2;SOS Ras/Rho guanine nucleotide exchange factor 2	-0.0260931	10.1003	0.802982	0.903995	-0.256967	-6.59897
Kid. Cortex	Mouse	Ccdc88b	Ccdc88b	A0A494BB08;Q4QRL3	Coiled-coil domain containing 88B (Fragment);Coiled-coil domain-containing protein 88B		8.67146
Kid. Cortex	Mouse	Gm50478	Gm50478	A0A494BB10	Predicted gene, 50478	-0.330771	10.5969	0.187125	0.416217	-1.42776	-5.6332
Kid. Cortex	Mouse	Haus1	Haus1	A0A494BB26	HAUS augmin-like complex, subunit 1	-0.0332248	9.77905	0.905373	0.955418	-0.122698	-6.54322
Kid. Cortex	Mouse	Eif1a	Eif1a	A0A494BB95;Q60872	Eukaryotic translation initiation factor 4C;Eukaryotic translation initiation factor 1A	0.753919	8.87605	0.00271416	0.0402311	4.09064	-1.53683
Kid. Cortex	Mouse	Scyl1	Scyl1	A0A494BBD3;Q9EQC5;R4H4Y7	SCY1-like 1 (S. cerevisiae) (Fragment);N-terminal kinase-like protein;SCY1-like 1 (S. cerevisiae)	0.0887107	12.4115	0.228369	0.462808	1.29253	-5.79922
Kid. Cortex	Mouse	Reep5	Reep5	A0A494BBE3;G3X8R0	Receptor accessory protein 5 (Fragment);Receptor expression-enhancing protein	-0.300066	12.3338	0.608302	0.791606	-0.530954	-6.48333
Kid. Cortex	Mouse	Fgf1	Fgf1	A0A494BBG9	Multifunctional fusion protein	0.893999	10.7642	0.285655	0.524178	1.29602	-5.22287
Kid. Cortex	Mouse	Tm7sf2	Tm7sf2	A0A494BBJ1;E0CX74;E0CX92;E0CZ93;E9Q4M8;Q71KT5	Transmembrane 7 superfamily member 2;Transmembrane 7 superfamily member 2;Transmembrane 7 superfamily member 2 (Fragment);Transmembrane 7 superfamily member 2 (Fragment);Transmembrane 7 superfamily member 2;Delta(14)-sterol reductase TM7SF2	-0.0879769	10.2441	0.557349	0.759848	-0.609366	-6.43623
Kid. Cortex	Mouse	Rhot1	Rhot1	A0A494BBK2	Ras homolog family member T1 (Fragment)	-0.0710382	10.1671	0.685805	0.837786	-0.417913	-6.54044
Kid. Cortex	Mouse	Fas	Fas	A0A494BBP5;P25446	Tumor necrosis factor receptor superfamily member 6	0.0200471	10.9026	0.832063	0.919892	0.218303	-6.60894
Kid. Cortex	Mouse	Actr5	Actr5	A0A0A0MQ89;Q80US4	ARP5 actin-related protein 5;Actin-related protein 5	0.187466	9.60707	0.0824757	0.263974	1.95368	-4.90294
Kid. Cortex	Mouse	H2-Eb1	H2-Eb1	A0A498U6I0;O78196	Histocompatibility 2, class II antigen E beta (Fragment);Histocompatibility 2, class II antigen E beta	1.49973	10.9848	3.42065e-05	0.00501952	7.57297	2.84209
Kid. Cortex	Mouse	Txnl1	Txnl1	A0A498WGD8;Q8CDN6	Thioredoxin-like 1;Thioredoxin-like protein 1	0.0479927	13.8463	0.582516	0.775414	0.570165	-6.46053
Kid. Cortex	Mouse	Phf21a	Phf21a	A0A498WGG5;A2AHG3;A2AHG4;D3Z764;E9PV92;E9QKW9;F6TKP4;F6URE6;Q6ZPK0	PHD finger protein 21A;PHD finger protein 21A;PHD finger protein 21A;PHD finger protein 21A;PHD finger protein 21A;PHD finger protein 21A;PHD finger protein 21A (Fragment);PHD finger protein 21A (Fragment);PHD finger protein 21A	0.0469778	8.87766	0.89371	0.948743	0.145267	-6.03901
Kid. Cortex	Mouse	Tm9sf3	Tm9sf3	A0A498WGK6;Q9ET30	Transmembrane 9 superfamily member;Transmembrane 9 superfamily member 3	-0.0663482	13.017	0.438597	0.66633	-0.810428	-6.28888
Kid. Cortex	Mouse	Ssh3	Ssh3	A0A498WGL8;Q8K330	protein-serine/threonine phosphatase;Protein phosphatase Slingshot homolog 3	0.24826	11.751	0.0228862	0.129607	2.73894	-3.67365
Kid. Cortex	Mouse	Nmrk1	Nmrk1	A0A498WGT1;Q91W63	Nicotinamide riboside kinase 1	0.0154777	11.7905	0.907053	0.956305	0.120086	-6.62703
Kid. Cortex	Mouse	Negr1	Negr1	A0A4W9;D3Z4T6;Q80Z24	Neuronal growth regulator 1	0.272694	10.619	0.0480751	0.19501	2.33113	-4.3075
Kid. Cortex	Mouse	Ube4b	Ube4b	A0A571BD95;A0A5F8MP95;Q9ES00	Ubiquitin conjugation factor E4;Ubiquitin conjugation factor E4;Ubiquitin conjugation factor E4 B	0.154857	11.7929	0.0311864	0.154004	2.55014	-3.9765
Kid. Cortex	Mouse	Srcin1	Srcin1	A0A571BDG0	SRC kinase signaling inhibitor 1	-0.0978925	11.6276	0.293562	0.530408	-1.11543	-5.99915
Kid. Cortex	Mouse	Ccdc30	Ccdc30	A0A571BDK5	Coiled-coil domain containing 30	-0.225418	8.21551	0.652798	0.818876	-0.467228	-6.43281
Kid. Cortex	Mouse	S100a13	S100a13	A0A0A0MQ90;P97352	Protein S100-A13	0.0505212	14.0525	0.736322	0.86754	0.347338	-6.56945
Kid. Cortex	Mouse	Tmub1	Tmub1	A0A571BDL1;D3Z108;D3Z5X7;E9QN77;Q9JMG3	Transmembrane and ubiquitin-like domain containing 1;Transmembrane and ubiquitin-like domain containing 1 (Fragment);Transmembrane and ubiquitin-like domain containing 1 (Fragment);Transmembrane and ubiquitin-like domain containing 1;Transmembrane and ubiquitin-like domain-containing protein 1	0.0259847	11.3715	0.81976	0.912725	0.234612	-6.60493
Kid. Cortex	Mouse	Gnas	Gnas	A0A571BDL4	GNAS (guanine nucleotide binding protein, alpha stimulating) complex locus	-0.489547	16.2394	0.122914	0.331773	-1.70224	-5.26647
Kid. Cortex	Mouse	Aak1	Aak1	A0A571BDM4	AP2 associated kinase 1 (Fragment)	-0.0620282	9.58201	0.82747	0.917475	-0.225199	-6.52364
Kid. Cortex	Mouse	Rab3il1	Rab3il1	A0A571BDP7;D3YZ86;Q8VDV3	RAB3A interacting protein (rabin3)-like 1;RAB3A interacting protein (rabin3)-like 1;Guanine nucleotide exchange factor for Rab-3A	0.0866404	10.9664	0.478729	0.701208	0.739012	-6.34547
Kid. Cortex	Mouse	Sh3d19	Sh3d19	A0A571BEF4	SH3 domain protein D19	0.0836749	10.4841	0.302015	0.53955	1.09485	-6.02097
Kid. Cortex	Mouse	Patj	Patj	A0A571BEG7;Q63ZW7	PATJ, crumbs cell polarity complex component;InaD-like protein	-0.105739	12.7283	0.398285	0.629839	-0.886756	-6.22347
Kid. Cortex	Mouse	Tnks1bp1	Tnks1bp1	A0A571BEG9	Tankyrase 1 binding protein 1 (Fragment)	0.312761	10.9599	0.034439	0.163236	2.48968	-4.07293
Kid. Cortex	Mouse	Arhgef28	Arhgef28	A0A571BEH9;P97433	Rho guanine nucleotide exchange factor (GEF) 28;Rho guanine nucleotide exchange factor 28	-0.06911	12.3019	0.310641	0.547369	-1.07431	-6.04245
Kid. Cortex	Mouse	Gnas	Gnas	A0A571BEI3;P63094;Q6R0H7	GNAS (guanine nucleotide binding protein, alpha stimulating) complex locus;Guanine nucleotide-binding protein G(s) subunit alpha isoforms short;Guanine nucleotide-binding protein G(s) subunit alpha isoforms XLas	-0.230786	14.2763	0.00753624	0.0704504	-3.4276	-2.56782
Kid. Cortex	Mouse	Ap3b2	Ap3b2	A0A571BES1;Q9JME5	AP-3 complex subunit beta;AP-3 complex subunit beta-2	-0.289925	6.12563	0.309484	0.546037	-1.13069	-5.6745
Kid. Cortex	Mouse	Nccrp1	Nccrp1	A0A0A0MQ97;G3X9C2	Non-specific cytotoxic cell receptor protein 1 homolog (zebrafish);F-box only protein 50	-0.78306	10.5703	0.0919285	0.280824	-1.88594	-5.00302
Kid. Cortex	Mouse	Mgam	Mgam	A0A571BF69	Maltase-glucoamylase	-0.467176	13.702	0.000145362	0.011573	-6.27412	1.41611
Kid. Cortex	Mouse	Fam83h	Fam83h	A0A571BFA7;Q148V8	Family with sequence similarity 83, member H;Protein FAM83H	0.167973	11.3347	0.182768	0.41109	1.4435	-5.61319
Kid. Cortex	Mouse	Frmpd4	Frmpd4	A0A571BG68;A0A589MR22;A2AFR3	FERM and PDZ domain containing 4;FERM and PDZ domain containing 4;FERM and PDZ domain-containing protein 4	1.08148	8.5401	0.173508	0.399206	1.54411	-5.25256
Kid. Cortex	Mouse	Abr	Abr	A0A571BG95	Active breakpoint cluster region-related protein	0.0355855	12.0956	0.668748	0.828203	0.442246	-6.52924
Kid. Cortex	Mouse	Dst	Dst	A0A571BGG5	Dystonin (Fragment)	-0.0607112	10.7943	0.525439	0.737658	-0.660559	-6.40228
Kid. Cortex	Mouse	Nav1	Nav1	A0A589P973;Q8CH77	Neuron navigator 1	1.18894	10.3186	0.00642704	0.0649588	3.83359	-2.16177
Kid. Cortex	Mouse	Mapk10	Mapk10	A0A5F8MP75;E9QN59;Q3TQZ7;Q61831;Q80W80;Q8C9D4	Stress-activated protein kinase JNK;Stress-activated protein kinase JNK;Stress-activated protein kinase JNK;Mitogen-activated protein kinase 10;Stress-activated protein kinase JNK;Stress-activated protein kinase JNK	0.0724677	9.92173	0.562811	0.764089	0.600776	-6.44169
Kid. Cortex	Mouse	Septin4	Septin4	A0A5F8MP96;P28661	Septin 4;Septin-4	0.281251	12.5688	0.00875012	0.0757766	3.33346	-2.71774
Kid. Cortex	Mouse	Erich4	Erich4	A0A5F8MPB4;G5E8M5;Q3UNU4	Glutamate rich 4;Glutamate rich 4;Glutamate-rich protein 4	-0.391573	9.76562	0.0474389	0.193261	-2.48564	-4.00646
Kid. Cortex	Mouse	Itga6	Itga6	A0A5F8MPB5;Q61739	Integrin alpha 6;Integrin alpha-6	-0.119444	14.6339	0.229304	0.464012	-1.28971	-5.80256
Kid. Cortex	Mouse	Jmjd1c	Jmjd1c	A0A0A0MQ98;G3UZM1;Q69ZK6	Jumonji domain containing 1C;Jumonji domain containing 1C;Probable JmjC domain-containing histone demethylation protein 2C	0.0535338	10.5757	0.484157	0.706013	0.729654	-6.35254
Kid. Cortex	Mouse	Tnk2	Tnk2	A0A5F8MPC4;D3Z3U5;D3Z3U6;G3X9X7;O54967	non-specific protein-tyrosine kinase;non-specific protein-tyrosine kinase;non-specific protein-tyrosine kinase;non-specific protein-tyrosine kinase;Activated CDC42 kinase 1	-0.320298	10.5523	0.222868	0.457748	-1.3093	-5.77922
Kid. Cortex	Mouse	Sall3	Sall3;Sall3;Sall1;Sall1	A0A5F8MPC9;Q62255;Q6P5E3;Q9ER74	Spalt like transcription factor 3;Sal-like protein 3;Sal-like 1 (Drosophila);Sal-like protein 1	-0.57687	9.23372	0.0661707	0.23286	-2.17453	-4.50168
Kid. Cortex	Mouse	Filip1	Filip1	A0A5F8MPD6;Q9CS72	Filamin A interacting protein 1;Filamin-A-interacting protein 1	0.241876	7.9419	0.275895	0.513591	1.22278	-5.39466
Kid. Cortex	Mouse	Kif1b	Kif1b	A0A5F8MPF0;Q60575	Kinesin family member 1B;Kinesin-like protein KIF1B	0.087721	12.6316	0.244782	0.482409	1.2444	-5.85562
Kid. Cortex	Mouse	Mical3	Mical3	A0A5F8MPF3;A0A5F8MPN4;A0A5F8MPU7;Q8CJ19	F-actin monooxygenase;F-actin monooxygenase;F-actin monooxygenase;[F-actin]-monooxygenase MICAL3	0.0919709	10.0706	0.429868	0.659753	0.826533	-6.2755
Kid. Cortex	Mouse	Arhgef18	Arhgef18	A0A5F8MPF6;A0A5F8MPH6;Q6P9R4	Rho/rac guanine nucleotide exchange factor (GEF) 18;Rho/rac guanine nucleotide exchange factor (GEF) 18;Rho guanine nucleotide exchange factor 18	0.0490208	12.1845	0.535049	0.745112	0.644954	-6.41289
Kid. Cortex	Mouse	Ptpdc1	Ptpdc1	A0A5F8MPG6;Q6NZK8	Protein tyrosine phosphatase domain containing 1;Protein tyrosine phosphatase domain-containing protein 1	0.232948	9.23743	0.492504	0.712018	0.724072	-6.22527
Kid. Cortex	Mouse	Sytl2	Sytl2	A0A5F8MPH5;Q99N50	Synaptotagmin-like 2;Synaptotagmin-like protein 2	0.424091	10.0427	0.0494472	0.197354	2.26894	-4.42125
Kid. Cortex	Mouse	Tnxb	Tnxb	A0A5F8MPH8	Tenascin XB	0.0197914	11.8192	0.91637	0.959812	0.107993	-6.62853
Kid. Cortex	Mouse	Rapgef1	Rapgef1	A0A5F8MPI9;Q3UHC1;Q91ZZ2	Rap guanine nucleotide exchange factor (GEF) 1;Rap guanine nucleotide exchange factor (GEF) 1;Guanine nucleotide exchange factor	0.162699	9.67745	0.0530898	0.206275	2.22543	-4.48902
Kid. Cortex	Mouse	Swi5	Swi5	A0A0A0MQ99;V9GXX7	DNA repair protein SWI5 homolog;DNA repair protein SWI5 homolog (Fragment)	-0.0672767	10.8764	0.490242	0.71043	-0.719244	-6.36032
Kid. Cortex	Mouse	Sacm1l	Sacm1l	A0A5F8MPK9;Q9EP69	SAC1 suppressor of actin mutations 1-like (yeast);Phosphatidylinositol-3-phosphatase SAC1	-0.0493599	14.8055	0.547322	0.753725	-0.625263	-6.42596
Kid. Cortex	Mouse	Snap91	Snap91	A0A5F8MPL3;E9Q9A3;E9QLK9;E9QQ05;Q3TWS4;Q61548	Synaptosomal-associated protein 91;Synaptosomal-associated protein 91;Synaptosomal-associated protein 91;Synaptosomal-associated protein 91;Synaptosomal-associated protein 91;Clathrin coat assembly protein AP180	-0.00650548	9.36155	0.984735	0.993069	-0.0201078	-6.33372
Kid. Cortex	Mouse	Mpz	Mpz	A0A5F8MPM4;E9QK82;P27573	Myelin protein P0	0.226703	10.1796	0.679328	0.834042	0.456067	-5.92571
Kid. Cortex	Mouse	Fry	Fry	A0A5F8MPN1;E9Q8I9	FRY microtubule binding protein;Protein furry homolog	0.272175	9.7742	0.0708673	0.24314	2.04777	-4.76169
Kid. Cortex	Mouse	Qtrt2	Qtrt2	A0A5F8MPN7;B8ZXI1	Queuine tRNA-ribosyltransferase accessory subunit 2	0.01832	10.8884	0.874518	0.941612	0.162479	-6.6205
Kid. Cortex	Mouse	Plekhg1	Plekhg1	A0A5F8MPP0;F6S200;Q3UX37	Pleckstrin homology domain containing, family G (with RhoGef domain) member 1;Pleckstrin homology domain containing, family G (with RhoGef domain) member 1 (Fragment);Pleckstrin homology domain containing, family G (with RhoGef domain) member 1	0.633011	9.78789	0.028924	0.147577	2.59605	-3.90308
Kid. Cortex	Mouse	Usp25	Usp25	A0A5F8MPP4;P57080	ubiquitinyl hydrolase 1;Ubiquitin carboxyl-terminal hydrolase 25	0.0178362	11.4763	0.833019	0.920456	0.217037	-6.60924
Kid. Cortex	Mouse	Sh3pxd2b	Sh3pxd2b	A0A5F8MPP7;A2AAY5	SH3 and PX domains 2B;SH3 and PX domain-containing protein 2B	0.656473	10.3918	0.000228743	0.0129826	5.90101	0.962832
Kid. Cortex	Mouse	Ift46	Ift46	A0A5F8MPR6	Intraflagellar transport protein 46 homolog	-0.230865	10.5642	0.129379	0.33998	-1.66939	-5.3122
Kid. Cortex	Mouse	Pdzrn3	Pdzrn3	A0A5F8MPS6;Q69ZS0	PDZ domain containing RING finger 3 (Fragment);E3 ubiquitin-protein ligase PDZRN3	0.0139712	9.6223	0.971213	0.985994	0.0372309	-6.58239
Kid. Cortex	Mouse	Serpina1a	Serpina1a;Serpina1c;Serpina1a;Serpina1c	A0A0A0MQA3;A0A0R4J0X5;P07758;Q00896	Serine (or cysteine) peptidase inhibitor, clade A, member 1A;Serine (or cysteine) peptidase inhibitor, clade A, member 1C;Alpha-1-antitrypsin 1-1;Alpha-1-antitrypsin 1-3	2.39948	14.3114	1.42805e-05	0.00342591	8.44807	3.68308
Kid. Cortex	Mouse	Acp2	Acp2	A0A5F8MPS7;P24638	Acid phosphatase 2, lysosomal;Lysosomal acid phosphatase	0.265375	12.1524	0.0650835	0.230342	2.10032	-4.6818
Kid. Cortex	Mouse	Tmem87b	Tmem87b	A0A5F8MPT2;Q8BKU8;Z4YML9	Transmembrane protein 87B;Transmembrane protein 87B;Transmembrane protein 87B (Fragment)	0.0407421	10.0607	0.817778	0.911607	0.237246	-6.60425
Kid. Cortex	Mouse	Cgn	Cgn	A0A5F8MPT6;E9QMC1	Cingulin	-0.0318081	11.9686	0.665981	0.827125	-0.446218	-6.52736
Kid. Cortex	Mouse	Agt	Agt	A0A5F8MPW1;Q3UTR7	Angiotensinogen	0.627579	12.5928	0.00776826	0.0711938	3.40844	-2.59828
Kid. Cortex	Mouse	Exoc6	Exoc6	A0A5F8MPW8;Q3U9D6	Exocyst complex component	-0.108914	12.3799	0.115458	0.320154	-1.74215	-5.21032
Kid. Cortex	Mouse	Kat6a	Kat6a	A0A5F8MPX1;G3X940;Q8BZ21	Histone acetyltransferase;Histone acetyltransferase;Histone acetyltransferase KAT6A	0.565557	9.45295	0.645817	0.81505	0.475415	-6.513
Kid. Cortex	Mouse	Eed	Eed	A0A5F8MPX8;Q921E6	Embryonic ectoderm development;Polycomb protein EED	0.186991	10.8761	0.0441899	0.185621	2.33763	-4.3136
Kid. Cortex	Mouse	Pigbos1	Pigbos1	A0A5F8MPY0	Pigb opposite strand 1	-0.360022	10.891	0.48013	0.701966	-0.777784	-5.90767
Kid. Cortex	Mouse	Ptk2	Ptk2	A0A5F8MPY3;P34152	non-specific protein-tyrosine kinase;Focal adhesion kinase 1	0.122867	12.9169	0.0706262	0.242835	2.04988	-4.7585
Kid. Cortex	Mouse	Klc1	Klc1	A0A5F8MPZ2;E9Q7C9;Q5UE59;Q7TNF4;Q8CD76	Kinesin light chain	0.38348	12.8804	0.000626265	0.0197276	5.12192	-0.0514831
Kid. Cortex	Mouse	Ighg3	Ighg3;Ighg3;	A0A075B5P5;A0A1Y7VJN6;P03987	Immunoglobulin heavy constant gamma 3 (Fragment);Immunoglobulin heavy constant gamma 3 (Fragment);Ig gamma-3 chain C region	-0.496833	11.1165	0.0441103	0.185513	-2.33874	-4.31187
Kid. Cortex	Mouse	Tuba4a	Tuba4a	A0A0A0MQA5;P68368	Tubulin alpha chain (Fragment);Tubulin alpha-4A chain	-0.232913	15.5798	0.0036147	0.0475256	-3.9008	-1.82683
Kid. Cortex	Mouse	Cdc14a	Cdc14a	A0A5F8MPZ4;Q6GQT0	CDC14 cell division cycle 14A;Dual specificity protein phosphatase CDC14A	-0.0601106	14.221	0.490231	0.71043	-0.719263	-6.3603
Kid. Cortex	Mouse	Bin2	Bin2	A0A5F8MQ05;D3Z6Q9;S4R270;S4R2J8	Bridging integrator 2	1.107	11.1079	0.00391827	0.0494512	3.84794	-1.90837
Kid. Cortex	Mouse	Rxra	Rxra	A0A5F8MQ23;P28700;Q6LC96	Retinoic acid receptor RXR;Retinoic acid receptor RXR-alpha;Retinoic acid receptor RXR	0.200082	11.2695	0.0514856	0.202	2.24422	-4.4598
Kid. Cortex	Mouse	Ppp6r2	Ppp6r2	A0A5F8MQ25;G3X9K4;Q8R3Q2	Protein phosphatase 6, regulatory subunit 2;Protein phosphatase 6, regulatory subunit 2;Serine/threonine-protein phosphatase 6 regulatory subunit 2	-0.0595823	10.474	0.526926	0.738541	-0.658133	-6.40394
Kid. Cortex	Mouse	Mrtfa	Mrtfa	A0A5F8MQ33;D3YUG5;D3YUI2;Q8K4J6	Myocardin related transcription factor A;Myocardin related transcription factor A (Fragment);Myocardin related transcription factor A;Myocardin-related transcription factor A	-0.35927	9.31438	0.256759	0.494742	-1.22124	-5.8296
Kid. Cortex	Mouse	Kat6b	Kat6b	A0A5F8MQ39;Q8BRB7	histone acetyltransferase;Histone acetyltransferase KAT6B	-0.433203	8.58434	0.504695	0.720863	-0.718353	-6.04884
Kid. Cortex	Mouse	Ufsp1	Ufsp1	A0A5F8MQD2;Q9CZP0	UFM1-specific peptidase 1;Ufm1-specific protease 1	-0.329397	9.94419	0.0589615	0.218307	-2.16109	-4.58858
Kid. Cortex	Mouse	Igkc	Igkc	A0A5H1ZRK8;P01837	Immunoglobulin kappa constant (Fragment);Immunoglobulin kappa constant	0.77053	9.97327	0.021472	0.125706	2.77794	-3.61088
Kid. Cortex	Mouse	Spire1	Spire1	A0A5H1ZRL1	Spire type actin nucleation factor 1	-0.11216	10.2892	0.274179	0.511891	-1.16445	-5.94595
Kid. Cortex	Mouse	Nelfb	Nelfb	A0A5H1ZRL3	Negative elongation factor B	0.162137	12.0171	0.0967568	0.289997	1.85384	-5.04994
Kid. Cortex	Mouse	Plekhg5	Plekhg5	A0A0A0MQC2;A0A5F8MPI8;B1AS67;Q66T02	Pleckstrin homology domain containing, family G (with RhoGef domain) member 5;Pleckstrin homology domain containing, family G (with RhoGef domain) member 5;Pleckstrin homology domain containing, family G (with RhoGef domain) member 5;Pleckstrin homology domain-containing family G member 5	0.0789022	10.6229	0.503486	0.72012	0.696866	-6.37669
Kid. Cortex	Mouse	Trp53bp1	Trp53bp1;Tp53bp1	A0A5H1ZRL7;P70399	Transformation related protein 53 binding protein 1;TP53-binding protein 1	0.178552	11.4336	0.1807	0.409281	1.45108	-5.6035
Kid. Cortex	Mouse	Mecom	Mecom	A0A5H1ZRN1;G3UWJ0;G3UYK2;P14404	MDS1 and EVI1 complex locus (Fragment);MDS1 and EVI1 complex locus (Fragment);MDS1 and EVI1 complex locus (Fragment);Histone-lysine N-methyltransferase MECOM	-0.174886	10.7329	0.603543	0.789184	-0.538123	-6.47927
Kid. Cortex	Mouse	Ttn	Ttn	A0A5K1VVQ9;A2ASS6	Titin	-0.0806093	13.3385	0.260886	0.498495	-1.19969	-5.90666
Kid. Cortex	Mouse	Kctd11	Kctd11	A0A5K1VVR8;Q8K485	Potassium channel tetramerisation domain containing 11;BTB/POZ domain-containing protein KCTD11	0.409001	7.57481	0.149942	0.369659	1.61685	-5.27078
Kid. Cortex	Mouse	Fam107a	Fam107a	A0A5S8E879;Q78TU8	Family with sequence similarity 107, member A;Actin-associated protein FAM107A	0.048483	9.96537	0.866905	0.937345	0.174907	-6.36779
Kid. Cortex	Mouse	Mast2	Mast2	A0A668KL31;A0A668KLF8;B1AST7;B1AST8	non-specific serine/threonine protein kinase	0.0881355	12.003	0.439406	0.666663	0.808946	-6.2901
Kid. Cortex	Mouse	Ccdc50	Ccdc50	A0A668KL36;F6UK66;Q810U5	Coiled-coil domain containing 50;Coiled-coil domain containing 50 (Fragment);Coiled-coil domain-containing protein 50	0.315756	11.316	0.0332042	0.160287	2.51193	-4.03748
Kid. Cortex	Mouse	Nkrf	Nkrf	A0A668KL68	NF-kappaB repressing factor	0.315411	8.1037	0.319438	0.556262	1.07162	-5.9143
Kid. Cortex	Mouse	Clic5	Clic5	A0A668KLB7	Chloride intracellular channel protein	-0.432437	12.4994	0.0031927	0.0441746	-3.98265	-1.70123
Kid. Cortex	Mouse	Map2	Map2	A0A668KLC6;P20357	Microtubule-associated protein;Microtubule-associated protein 2	-0.0784361	11.727	0.40304	0.633577	-0.877481	-6.23168
Kid. Cortex	Mouse	Urah	Urah	A0A0A0MQC3;A0A1B0GR99;Q9CRB3	5-hydroxyisourate hydrolase;5-hydroxyisourate hydrolase (Fragment);5-hydroxyisourate hydrolase	0.143167	8.29315	0.746195	0.873072	0.335061	-6.52163
Kid. Cortex	Mouse	Tspan4	Tspan4	A0A668KLD1;D3Z0B7;D3Z0T3;Q9DCK3	Tetraspanin 4;Tetraspanin 4 (Fragment);Tetraspanin 4 (Fragment);Tetraspanin-4	0.245493	12.3715	0.0151376	0.103946	2.99254	-3.26502
Kid. Cortex	Mouse	Akap12	Akap12	A0A668KLD3;A0A668KLV9;Q9WTQ5	A kinase (PRKA) anchor protein (gravin) 12;A kinase (PRKA) anchor protein (gravin) 12;A-kinase anchor protein 12	0.621767	13.4058	0.000383037	0.0158727	5.4941	0.444698
Kid. Cortex	Mouse	Esrra	Esrra	A0A668KLU7;G3UY24;O08580	Estrogen related receptor, alpha;Estrogen related receptor, alpha;Steroid hormone receptor ERR1	-0.254586	11.0778	0.0100733	0.0821991	-3.24523	-2.85883
Kid. Cortex	Mouse	Slc4a4	Slc4a4	A0A668KM61	Anion exchange protein	-1.06257	10.5334	0.00206618	0.0352762	-4.27456	-1.26048
Kid. Cortex	Mouse	Dnase1l1	Dnase1l1	A0A6I8MWW4;Q9D7J6	Deoxyribonuclease;Deoxyribonuclease-1-like 1	-0.825303	7.53299	0.363503	0.596513	-0.95713	-6.15882
Kid. Cortex	Mouse	Msantd2	Msantd2	A0A6I8MWX7;Q6NZR2	Myb/SANT-like DNA-binding domain containing 2;Myb/SANT-like DNA-binding domain-containing protein 2	0.132819	9.23497	0.681759	0.83547	0.434908	-6.22607
Kid. Cortex	Mouse	Dnajc7	Dnajc7	A0A6I8MWX8;A0A6I8MX00;A2A5E1;Q9QYI3	DnaJ heat shock protein family (Hsp40) member C7;DnaJ heat shock protein family (Hsp40) member C7;DnaJ heat shock protein family (Hsp40) member C7;DnaJ homolog subfamily C member 7	-0.0230373	12.091	0.854422	0.930579	-0.188821	-6.61546
Kid. Cortex	Mouse	Golga2	Golga2	A0A6I8MWY5;A0A6I8MX07;E9PUQ5;Q921M4;Z4YJU8	Golgi autoantigen, golgin subfamily a, 2;Golgi autoantigen, golgin subfamily a, 2;Golgi autoantigen, golgin subfamily a, 2;Golgin subfamily A member 2;Golgi autoantigen, golgin subfamily a, 2	-0.0205362	12.5106	0.747547	0.873788	-0.331923	-6.5751
Kid. Cortex	Mouse	Mtx1	Mtx1	A0A6I8MWZ8;P47802;Q8R5C0	Metaxin 1;Metaxin-1;Metaxin	-0.212801	14.0387	0.0969348	0.290348	-1.85268	-5.05162
Kid. Cortex	Mouse	Ccdc88a	Ccdc88a	A0A6I8MX08;Q5SNZ0	Coiled coil domain containing 88A;Girdin	0.34167	8.83775	0.0851041	0.268674	1.93414	-4.93196
Kid. Cortex	Mouse	Slc16a5	Slc16a5	A0A0A0MQC4;G5E8K6	Solute carrier family 16 (monocarboxylic acid transporters), member 5;Monocarboxylate transporter 6	-0.192141	8.17097	0.633265	0.807337	-0.493812	-6.50352
Kid. Cortex	Mouse	Ago1	Ago1	A0A6I8MX18;Q8CJG1	Argonaute RISC catalytic subunit 1;Protein argonaute-1	0.133163	12.2634	0.248866	0.487051	1.23284	-5.86894
Kid. Cortex	Mouse	Ldhb	Ldhb	A0A6I8MX27;P16125	L-lactate dehydrogenase;L-lactate dehydrogenase B chain	-0.217773	18.2948	0.00758328	0.0705594	-3.42367	-2.57407
Kid. Cortex	Mouse	Tpgs1	Tpgs1	A0A6Q6PKE1;Q99MS8	Tubulin polyglutamylase complex subunit 1	-0.04429	8.90714	0.841833	0.924551	-0.207092	-6.48374
Kid. Cortex	Mouse	Prpf40a	Prpf40a	A0A6Q6PUT5;Q9R1C7	Pre-mRNA processing factor 40A (Fragment);Pre-mRNA-processing factor 40 homolog A	0.130432	12.8649	0.130345	0.340923	1.66461	-5.31882
Kid. Cortex	Mouse	Snx14	Snx14	A0A6Q6RCM4;G3UX33;Q8BHY8	Sorting nexin 14;Sorting nexin 14;Sorting nexin-14	0.0809683	10.8952	0.19595	0.426411	1.39682	-5.67211
Kid. Cortex	Mouse	Braf	Braf	A0A7N4FLU7;P28028	non-specific serine/threonine protein kinase (Fragment);Serine/threonine-protein kinase B-raf	0.0607085	10.3532	0.642812	0.814068	0.479803	-6.51077
Kid. Cortex	Mouse	Ahnak2	Ahnak2	A0A7N9VR94	AHNAK nucleoprotein 2	1.38208	11.029	0.00506072	0.0572847	3.82395	-2.05701
Kid. Cortex	Mouse	Tmem134	Tmem134	A0A7N9VRB8;A0A7N9VSI3;A0A7N9VSI9;A0A7N9VSS0;A0A7N9VSV2;Q8R0J4	Transmembrane protein 134	-0.0410006	9.04843	0.583172	0.775962	-0.569157	-6.46114
Kid. Cortex	Mouse	Eppk1	Eppk1	A0A7N9VRC4;Q8R0W0	Epiplakin 1;Epiplakin	0.350543	11.8786	0.0330398	0.159993	2.51496	-4.03266
Kid. Cortex	Mouse	Spata5l1	Spata5l1	A0A7N9VSG0	Ribosome biogenesis protein SPATA5L1	0.0251479	9.92354	0.835482	0.921851	0.213781	-6.61
Kid. Cortex	Mouse	Tdrd7	Tdrd7	A0A0A0MQD1;Q8K1H1	Tudor domain-containing protein 7	0.129614	11.292	0.136803	0.352017	1.63346	-5.36169
Kid. Cortex	Mouse	Arvcf	Arvcf	A0A7N9VSS5	Armadillo repeat gene deleted in velocardiofacial syndrome (Fragment)	-0.358745	8.91813	0.366085	0.598895	-0.951742	-6.16392
Kid. Cortex	Mouse	Slc6a20b	Slc6a20b	A0A803YV45;O88575	Transporter;Sodium- and chloride-dependent transporter XTRP3B	-0.341719	13.8301	0.00872284	0.0757766	-3.33543	-2.71461
Kid. Cortex	Mouse	Sema3a	Sema3a	A0A803Z7F8;E9Q668;O08665	Sema domain, immunoglobulin domain (Ig), short basic domain, secreted, (semaphorin) 3A;Sema domain, immunoglobulin domain (Ig), short basic domain, secreted, (semaphorin) 3A;Semaphorin-3A	-0.169439	10.4999	0.194106	0.424445	-1.40319	-5.66415
Kid. Cortex	Mouse	Rnf213	Rnf213	A0A8I4P9C4;E9Q555	Ring finger protein 213;E3 ubiquitin-protein ligase RNF213	0.478145	12.1696	0.00251615	0.0389224	4.1414	-1.46011
Kid. Cortex	Mouse	Grip1	Grip1	A0A8I4SX76;D3YWY4;D3YZL8;D3Z066;D3Z6R6;D3Z6T4;H7BX09;H7BX90;Q6GQT7;Q6X4T6;Q925T6	Glutamate receptor interacting protein 1;Glutamate receptor interacting protein 1;Glutamate receptor interacting protein 1;Glutamate receptor interacting protein 1;Glutamate receptor interacting protein 1;Glutamate receptor interacting protein 1;Glutamate receptor interacting protein 1;Glutamate receptor interacting protein 1;Glutamate receptor interacting protein 1;Glutamate receptor-interacting…	0.468351	7.56872	0.302343	0.539935	1.2424	-5.27712
Kid. Cortex	Mouse	Ccdc9b	Ccdc9b	A0A8Q0K7A4;A3KGF9	Coiled-coil domain containing 9B;Coiled-coil domain-containing protein 9B	1.40474	7.58369	0.0213488	0.12537	3.30526	-3.05445
Kid. Cortex	Mouse	Ino80d	Ino80d	A0A8Q0LUL2;B1AT33;B1AT34;Q66JY2	INO80 complex subunit D (Fragment);INO80 complex subunit D (Fragment);INO80 complex subunit D (Fragment);INO80 complex subunit D	4.54107	7.73573	0.102297	0.29896	1.92677	-4.75916
Kid. Cortex	Mouse	Hypk	Hypk	A0A8Q0PQH5;Q9CR41	Huntingtin interacting protein K;Huntingtin-interacting protein K	0.0395562	12.3403	0.623513	0.801443	0.508232	-6.49584
Kid. Cortex	Mouse	Itgal	Itgal	A0A8Q0Q4S2;D3Z627;P24063	Integrin alpha L;Integrin alpha L;Integrin alpha-L	0.0438327	10.2943	0.8992	0.951936	0.130751	-6.57373
Kid. Cortex	Mouse	Lin52	Lin52	A0A8Q0Q6C4;Q8CD94	Protein lin-52 homolog	0.305481	8.47128	0.331382	0.567752	1.02666	-6.09105
Kid. Cortex	Mouse	9530068E07Rik	9530068E07Rik;Kct2	A0A0A0MQD4;Q8K201	RIKEN cDNA 9530068E07 gene;Keratinocyte-associated transmembrane protein 2	0.278866	11.6305	0.235664	0.472467	1.27079	-5.82487
Kid. Cortex	Mouse	Iqsec2	Iqsec2	A0A8V5L0N5	IQ motif and Sec7 domain 2 (Fragment)	0.225054	9.01894	0.171149	0.396023	1.50337	-5.48723
Kid. Cortex	Mouse	Clk3	Clk3	A0A8Z1S2G3;O35492	CDC-like kinase 3;Dual specificity protein kinase CLK3	0.204909	11.1154	0.00979503	0.0806883	3.26275	-2.83079
Kid. Cortex	Mouse	Renbp	Renbp	A0A8Z1SL50;D6RHA2;P82343	N-acylglucosamine 2-epimerase	-0.105223	13.4721	0.353178	0.587561	-0.978962	-6.13795
Kid. Cortex	Mouse	Fxr2	Fxr2	A0A991EKZ2	FMR1 autosomal homolog 2	0.0306836	14.1291	0.585907	0.778188	0.564957	-6.46365
Kid. Cortex	Mouse	Ptprg	Ptprg	A0A991ELE1	Protein tyrosine phosphatase, receptor type, G	0.0611682	11.8651	0.273318	0.510682	1.16669	-5.94347
Kid. Cortex	Mouse	Sfpq	Sfpq	A0A991ENV6;Q8VIJ6	Splicing factor proline/glutamine rich (polypyrimidine tract binding protein associated);Splicing factor, proline- and glutamine-rich	0.0119853	14.3984	0.887946	0.947494	0.144947	-6.62343
Kid. Cortex	Mouse	H1f10	H1f10	A0A991ENW0;Q80ZM5	H1.10 linker histone;H1 histone family, member X	0.571892	11.2065	0.0658	0.232095	2.09357	-4.6921
Kid. Cortex	Mouse	Rptor	Rptor	A0A991EQV1;A2ACM0	Regulatory associated protein of MTOR, complex 1;Regulatory associated protein of MTOR, complex 1	-0.0479347	11.4108	0.436924	0.664884	-0.813497	-6.28635
Kid. Cortex	Mouse	Nploc4	Nploc4	A0A991EQV5	NPL4 homolog, ubiquitin recognition factor	-0.365918	11.6227	0.574404	0.77094	-0.582696	-6.45293
Kid. Cortex	Mouse	Aspg	Aspg	A0JNU3	60 kDa lysophospholipase	-0.0650834	11.9335	0.840168	0.923923	-0.207593	-6.61142
Kid. Cortex	Mouse	Ralgapa2	Ralgapa2	A0A0A0MQD7;A0A2I3BPN8;A3KGS3	Ral GTPase activating protein, alpha subunit 2 (catalytic);Ral GTPase activating protein, alpha subunit 2 (catalytic);Ral GTPase-activating protein subunit alpha-2	-0.0374897	11.7345	0.789522	0.897535	-0.275004	-6.59377
Kid. Cortex	Mouse	Gphn	Gphn	A0JNY3	Gephyrin	-0.106614	14.6672	0.28245	0.520904	-1.1432	-5.96921
Kid. Cortex	Mouse	Cdhr5	Cdhr5	A0PJK7;Q8VHF2	Cadherin-related family member 5	-0.284547	13.4067	0.022539	0.128476	-2.74828	-3.65862
Kid. Cortex	Mouse	Veph1	Veph1	A1A535	Ventricular zone-expressed PH domain-containing protein 1	-0.386689	8.81871	0.257226	0.495076	-1.25181	-5.59834
Kid. Cortex	Mouse	Actn1	Actn1	A1BN54	Actinin, alpha 1	0.56047	11.9937	0.0107763	0.0853064	3.20314	-2.92631
Kid. Cortex	Mouse	Arhgef37	Arhgef37	A1IGU4;E9Q5R6	Rho guanine nucleotide exchange factor 37;Rho guanine nucleotide exchange factor (GEF) 37	0.344919	9.80919	0.221977	0.45663	1.31205	-5.77592
Kid. Cortex	Mouse	Mpeg1	Mpeg1	A1L314;E9QN37	Macrophage-expressed gene 1 protein	1.39891	10.4494	8.63235e-05	0.00884677	6.72206	1.93374
Kid. Cortex	Mouse	Slc9a6	Slc9a6	A1L3P4	Sodium/hydrogen exchanger 6	-0.148499	10.9807	0.0930736	0.282871	-1.87819	-5.01439
Kid. Cortex	Mouse	Ripor3	Ripor3	A1L3T7	RIPOR family member 3	0.0388993	9.57466	0.851849	0.929466	0.196644	-6.31156
Kid. Cortex	Mouse	Wt1	Wt1	A2A400;A2A401;A2A404;A2A405;F6VXG5;F6Y2T6;P22561	WT1 transcription factor (Fragment);WT1 transcription factor (Fragment);WT1 transcription factor;WT1 transcription factor;WT1 transcription factor (Fragment);WT1 transcription factor;Wilms tumor protein homolog	0.242819	10.2603	0.151451	0.37131	1.56745	-5.45109
Kid. Cortex	Mouse	Cul4b	Cul4b	A2A432;E9PXY1	Cullin-4B;Cullin 4B	0.0140652	12.4044	0.854041	0.930377	0.189322	-6.61536
Kid. Cortex	Mouse	Pou2f1	Pou2f1	A0A0A0MQE0;A0A0A0MQM6;A0A0R4J1Z4;E9Q6Z8;F8VQL7;I1E4X2;P25425	POU domain protein;POU domain protein (Fragment);POU domain protein;POU domain protein;POU domain protein;POU domain protein;POU domain, class 2, transcription factor 1	0.122075	10.1286	0.462836	0.688081	0.766805	-6.32399
Kid. Cortex	Mouse	Slc9a8	Slc9a8	A2A464;Q8R4D1	Sodium/hydrogen exchanger;Sodium/hydrogen exchanger 8	0.126592	11.0391	0.515738	0.730154	0.676487	-6.39121
Kid. Cortex	Mouse	Ncoa3	Ncoa3	A2A468;Q05BA5	Nuclear receptor coactivator	0.124928	11.1759	0.486645	0.708017	0.725388	-6.35574
Kid. Cortex	Mouse	Zmynd8	Zmynd8	A2A482;A2A483;A2A484;E9Q8D1;Q3U1M7;Q3UH28	Zinc finger, MYND-type containing 8;Zinc finger, MYND-type containing 8;Zinc finger, MYND-type containing 8;Zinc finger, MYND-type containing 8;Zinc finger, MYND-type containing 8;Zinc finger, MYND-type containing 8	0.0760243	10.4663	0.406764	0.637328	0.870271	-6.23802
Kid. Cortex	Mouse	Plcg1	Plcg1	A2A4A6;Q62077	1-phosphatidylinositol 4,5-bisphosphate phosphodiesterase gamma;1-phosphatidylinositol 4,5-bisphosphate phosphodiesterase gamma-1	0.0102128	11.7824	0.893092	0.948743	0.138242	-6.62447
Kid. Cortex	Mouse	Lpin3	Lpin3	A2A4B1;A2A4B3;Q99PI4	phosphatidate phosphatase;phosphatidate phosphatase;Phosphatidate phosphatase LPIN3	0.137556	9.30568	0.488961	0.710106	0.721429	-6.35869
Kid. Cortex	Mouse	Fkbp10	Fkbp10	A2A4H9;Q61576	peptidylprolyl isomerase;Peptidyl-prolyl cis-trans isomerase FKBP10	0.646479	11.0985	0.0269793	0.142368	2.70223	-3.74107
Kid. Cortex	Mouse	Nbr1	Nbr1	A2A4N5;A2A4N7;A2A4N8;K3W4P1;P97432;Q05BC8	NBR1, autophagy cargo receptor;NBR1, autophagy cargo receptor;NBR1, autophagy cargo receptor;NBR1, autophagy cargo receptor;Next to BRCA1 gene 1 protein;NBR1, autophagy cargo receptor	0.017236	10.0973	0.927305	0.965085	0.0938236	-6.63009
Kid. Cortex	Mouse	Dhx8	Dhx8	A2A4P0	ATP-dependent RNA helicase DHX8	0.134847	9.75677	0.110236	0.312232	1.77154	-5.16856
Kid. Cortex	Mouse	Gm27029	Gm27029;Gm27029;Aarsd1	A2A4P3;A2A4P4;Q3THG9	Predicted gene, 27029;Predicted gene, 27029;Alanyl-tRNA editing protein Aarsd1	-0.14076	13.3175	0.0621679	0.224781	-2.12854	-4.63861
Kid. Cortex	Mouse	Slc13a3	Slc13a3	A2A4U9;Q91Y63	Solute carrier family 13 (sodium-dependent dicarboxylate transporter), member 3;Na(+)/dicarboxylate cotransporter 3	-0.267422	13.9425	0.0905087	0.277912	-1.89569	-4.98872
Kid. Cortex	Mouse	Camsap1	Camsap1	A0A0A0MQE5;A2AHC3	Calmodulin regulated spectrin-associated protein 1;Calmodulin-regulated spectrin-associated protein 1	0.146535	10.1705	0.260576	0.498495	1.20053	-5.90571
Kid. Cortex	Mouse	Krt10	Krt10	A2A513;P02535	Keratin 10;Keratin, type I cytoskeletal 10	0.223065	12.2081	0.462764	0.688081	0.766932	-6.32389
Kid. Cortex	Mouse	Fbxl20	Fbxl20	A2A536;Q9CZV8	F-box and leucine-rich repeat protein 20 (Fragment);F-box/LRR-repeat protein 20	0.325214	11.4762	0.00826888	0.0735072	3.36905	-2.66099
Kid. Cortex	Mouse	Rpl19	Rpl19	A2A547;P84099	Ribosomal protein L19;60S ribosomal protein L19	-0.0842427	13.9766	0.501557	0.718576	-0.700103	-6.37435
Kid. Cortex	Mouse	Slc35c2	Slc35c2	A2A5A3;Q5GMG7;Q5GMG8;Q5GMG9;Q5GMH1;Q8VCX2	Solute carrier family 35, member C2 (Fragment);Solute carrier family 35, member C2 (Fragment);Solute carrier family 35, member C2 (Fragment);Solute carrier family 35, member C2 (Fragment);Solute carrier family 35, member C2 (Fragment);Solute carrier family 35 member C2	-0.27211	10.6631	0.369348	0.602062	-0.986135	-5.81876
Kid. Cortex	Mouse	Pltp	Pltp	A2A5K3;P55065	Phospholipid transfer protein (Fragment);Phospholipid transfer protein	0.743655	10.4333	0.0544596	0.209127	2.30656	-4.31208
Kid. Cortex	Mouse	Arfgef2	Arfgef2	A2A5R2	Brefeldin A-inhibited guanine nucleotide-exchange protein 2	-0.00988076	12.9137	0.85044	0.928363	-0.194058	-6.61437
Kid. Cortex	Mouse	Stau1	Stau1	A2A5S3	Staufen double-stranded RNA binding protein 1	0.0250168	12.8149	0.658127	0.822901	0.457541	-6.52189
Kid. Cortex	Mouse	Mapt	Mapt	A2A5Y6	Microtubule-associated protein	0.0586612	14.611	0.522464	0.73479	0.665424	-6.39892
Kid. Cortex	Mouse	Smurf2	Smurf2	A2A5Z6	E3 ubiquitin-protein ligase SMURF2	0.137982	10.1676	0.0759881	0.252261	2.00458	-4.82684
Kid. Cortex	Mouse	Bptf	Bptf	A2A654;A2A655;E9Q6A7	Bromodomain PHD finger transcription factor	0.0174709	11.7202	0.780474	0.892715	0.287183	-6.59006
Kid. Cortex	Mouse	Arhgap21	Arhgap21	A0A0A0MQE8;B7ZCJ0;B7ZCJ1;Q6DFV3	Rho GTPase activating protein 21;Rho GTPase activating protein 21;Rho GTPase activating protein 21;Rho GTPase-activating protein 21	-0.211436	9.94749	0.044655	0.186998	-2.33124	-4.32365
Kid. Cortex	Mouse	Tanc2	Tanc2	A2A690	Protein TANC2	-0.0177875	11.8435	0.814925	0.91013	-0.241041	-6.60327
Kid. Cortex	Mouse	Slc25a39	Slc25a39	A2A697;Q9D8K8	Mitochondrial glutathione transporter SLC25A39;Probable mitochondrial glutathione transporter SLC25A39	0.0792361	9.56309	0.704152	0.848882	0.392038	-6.55168
Kid. Cortex	Mouse	Fam171a2	Fam171a2	A2A699	Protein FAM171A2	0.26466	9.85553	0.0604505	0.221042	2.18434	-4.52828
Kid. Cortex	Mouse	Gpatch8	Gpatch8	A2A6A1	G patch domain-containing protein 8	0.122249	10.0966	0.159	0.380856	1.53564	-5.49344
Kid. Cortex	Mouse	Lasp1	Lasp1	A2A6H1	LIM and SH3 protein 1 (Fragment)	-0.789437	10.8508	0.129191	0.339675	-1.67033	-5.31091
Kid. Cortex	Mouse	Fbxo47	Fbxo47	A2A6H3	F-box only protein 47	-0.295085	9.52592	0.673686	0.830746	-0.436972	-6.47902
Kid. Cortex	Mouse	Lsp1	Lsp1	A2A6J7	Lymphocyte specific 1	1.34758	8.88758	0.000677141	0.0202951	6.41471	0.218213
Kid. Cortex	Mouse	Cdc27	Cdc27	A2A6Q5	Cell division cycle protein 27 homolog	-0.178106	10.3658	0.101908	0.298816	-1.8212	-5.09728
Kid. Cortex	Mouse	Myl4	Myl4	A2A6Q8;P09541;Q9CZ19	Myosin, light polypeptide 4 (Fragment);Myosin light chain 4;Myosin, light polypeptide 4	0.213026	10.3204	0.316031	0.553286	1.07978	-5.90591
Kid. Cortex	Mouse	Cdr2l	Cdr2l	A2A6T1	Cerebellar degeneration-related protein 2-like	-0.18997	10.0355	0.303027	0.540354	-1.24027	-5.27927
Kid. Cortex	Mouse	Ighm	Ighm	A0A075B5P6;A0A075B6A0	Immunoglobulin heavy constant mu (Fragment)	1.62212	11.276	3.51281e-06	0.0030996	10.0218	4.99141
Kid. Cortex	Mouse	Ano1	Ano1	A0A0A0MQF2;A0A5F8MPM2;D3YYA4;D3Z035;G8JL82;Q8BHY3	Anoctamin;Anoctamin;Anoctamin 1, calcium activated chloride channel (Fragment);Anoctamin 1, calcium activated chloride channel (Fragment);Anoctamin;Anoctamin-1	-0.0353826	9.29905	0.831712	0.919718	-0.218767	-6.60883
Kid. Cortex	Mouse	Osbpl7	Osbpl7	A2A716;F8VQM4	Oxysterol-binding protein	0.0438388	9.42404	0.829768	0.918711	0.22134	-6.60821
Kid. Cortex	Mouse	Zmym4	Zmym4	A2A791	Zinc finger MYM-type protein 4	0.275323	10.7708	0.0136524	0.0983527	3.0563	-3.16232
Kid. Cortex	Mouse	Zfp979	Zfp979;Zfp978;Zfp600;Zfp980;Rex2	A2A799;A2A7I1;A2A7V0;A2A9J5;A2AWF2	Zinc finger protein 979;Zinc finger protein 978 (Fragment);Zinc finger protein 600;Zinc finger protein 980;Reduced expression 2	-3.1736	11.2435	0.0042589	0.051775	-15.2675	-2.10831
Kid. Cortex	Mouse	H6pd	H6pd	A2A7A7;Q8CFX1	Hexose-6-phosphate dehydrogenase (glucose 1-dehydrogenase);GDH/6PGL endoplasmic bifunctional protein	0.419786	13.9458	0.0219886	0.127289	2.7634	-3.63429
Kid. Cortex	Mouse	Prdm2	Prdm2	A2A7B5	PR domain containing 2, with ZNF domain	0.317741	10.1012	0.0893725	0.275934	1.90359	-4.97709
Kid. Cortex	Mouse	Clcn6	Clcn6	A2A7F6;O35454	Chloride channel protein;H(+)/Cl(-) exchange transporter 6	0.229973	9.99194	0.0393642	0.174178	2.40819	-4.20228
Kid. Cortex	Mouse	Mthfr	Mthfr	A2A7F7;F6Z4F8;Q9WU20	Methylenetetrahydrofolate reductase;Methylenetetrahydrofolate reductase (Fragment);Methylenetetrahydrofolate reductase (NADPH)	0.176692	10.5366	0.013967	0.0995322	3.04222	-3.18499
Kid. Cortex	Mouse	Zfp691	Zfp691;Znf691	A2A7P4;Q3TDE8	Zinc finger protein 691	-0.00402058	8.97716	0.990611	0.99615	-0.0121942	-6.50756
Kid. Cortex	Mouse	Yars	Yars;Yars1	A2A7S7;Q91WQ3	Tyrosine--tRNA ligase;Tyrosine--tRNA ligase, cytoplasmic	-0.0302557	13.5146	0.647142	0.816042	-0.473483	-6.51398
Kid. Cortex	Mouse	Kiaa1522	Kiaa1522	A2A7S8	Uncharacterized protein KIAA1522	0.125523	11.666	0.143471	0.361856	1.60266	-5.40366
Kid. Cortex	Mouse	1700025G04Rik	1700025G04Rik;	A0A0A0MQF7;Q8K207	RIKEN cDNA 1700025G04 gene;Uncharacterized protein C1orf21 homolog	-0.00726578	8.54893	0.980474	0.9907	-0.0260387	-6.24546
Kid. Cortex	Mouse	Rere	Rere	A2A7T3;Q80TZ9	Arginine glutamic acid dipeptide (RE) repeats;Arginine-glutamic acid dipeptide repeats protein	0.161338	9.86948	0.0625324	0.225329	2.12494	-4.64413
Kid. Cortex	Mouse	Park7	Park7	A2A813;Q99LX0	protein deglycase;Parkinson disease protein 7 homolog	-0.273328	15.71	0.00169238	0.0314327	-4.41123	-1.05822
Kid. Cortex	Mouse	Epb41	Epb41	A2A838;A2A839	Protein 4.1 (Fragment);Protein 4.1	-0.802318	10.8333	0.00817584	0.0730993	-3.37618	-2.64963
Kid. Cortex	Mouse	Epb41	Epb41	A2A841;P48193	Protein 4.1	-0.379518	14.0223	0.000288614	0.0143617	-5.7153	0.729484
Kid. Cortex	Mouse	Acox1	Acox1	A2A848	Acyl-Coenzyme A oxidase 1, palmitoyl (Fragment)	-0.106714	12.9366	0.79047	0.898291	-0.273731	-6.59415
Kid. Cortex	Mouse	Itgb4	Itgb4	A2A863	Integrin beta-4	0.54574	10.4738	0.00558196	0.0605576	3.61878	-2.26566
Kid. Cortex	Mouse	Itgb4	Itgb4	A2A864	Integrin beta	0.538118	8.64342	0.151547	0.37131	1.6427	-5.12884
Kid. Cortex	Mouse	Fbf1	Fbf1	A2A870	Fas-binding factor 1		12.9843
Kid. Cortex	Mouse	Snx11	Snx11	A2A880;Q91WL6	Sorting nexin 11 (Fragment);Sorting nexin-11	-0.169231	9.74426	0.467494	0.691769	-0.829825	-5.66375
Kid. Cortex	Mouse	Ptprf	Ptprf	A2A8L5	Receptor-type tyrosine-protein phosphatase F	-0.0693619	13.1238	0.194033	0.424445	-1.40344	-5.66384
Kid. Cortex	Mouse	Obsl1	Obsl1	A0A0A0MQG1;A0A803ZIZ6;D3YYU8	Obscurin-like 1 (Fragment);Obscurin-like 1;Obscurin-like protein 1		5.87914
Kid. Cortex	Mouse	Zfyve9	Zfyve9	A2A8R0;A8Y5G5	Zinc finger FYVE domain-containing protein	0.102928	10.7054	0.571032	0.769041	0.587934	-6.4497
Kid. Cortex	Mouse	Tut4	Tut4	A2A8R7;B2RX14	RNA uridylyltransferase;Terminal uridylyltransferase 4	0.278795	9.84739	0.00152657	0.0305025	4.48258	-0.953705
Kid. Cortex	Mouse	Yipf1	Yipf1	A2A8S2;Q91VU1	Protein YIPF (Fragment);Protein YIPF1	-0.126071	11.7556	0.0823293	0.263847	-1.95479	-4.90129
Kid. Cortex	Mouse	Cyp4a32	Cyp4a32	A2A8T1	Cytochrome P450, family 4, subfamily a, polypeptide 32	2.34597	6.9869	0.556487	0.759072	0.629785	-5.92071
Kid. Cortex	Mouse	Tmem201	Tmem201	A2A8U2	Transmembrane protein 201	-0.0609969	11.9935	0.620434	0.79921	-0.512807	-6.49337
Kid. Cortex	Mouse	Srrm1	Srrm1	A2A8V8;A2A8V9;E9PUK6;Q52KI8	Serine/arginine repetitive matrix 1;Serine/arginine repetitive matrix 1;Serine/arginine repetitive matrix 1;Serine/arginine repetitive matrix protein 1	0.0401737	10.5133	0.704059	0.848882	0.392167	-6.55162
Kid. Cortex	Mouse	Mknk1	Mknk1	A2A8W8;O08605	MAP kinase-interacting serine/threonine kinase 1;MAP kinase-interacting serine/threonine-protein kinase 1	0.160212	10.2962	0.514254	0.72926	0.678939	-6.38948
Kid. Cortex	Mouse	Osbpl9	Osbpl9	A2A8Z1;E9PXZ2;F6UHR6	Oxysterol-binding protein-related protein 9;Oxysterol-binding protein;Oxysterol-binding protein	0.0710391	13.342	0.399348	0.630685	0.884677	-6.22532
Kid. Cortex	Mouse	Cyp4a12b	Cyp4a12b	A2A974	Cytochrome P450 4A12B	-0.360419	13.0924	0.41994	0.650381	-0.845123	-6.25977
Kid. Cortex	Mouse	Cyp4a10	Cyp4a10	A2A977;O88833	Cytochrome P450, family 4, subfamily a, polypeptide 10;Cytochrome P450 4A10	-0.141754	13.1712	0.633213	0.807337	-0.493888	-6.50348
Kid. Cortex	Mouse	Macf1	Macf1	A0A0A0MQH5	Microtubule-actin crosslinking factor 1 (Fragment)	-0.080488	11.8025	0.643188	0.814101	-0.479254	-6.51105
Kid. Cortex	Mouse	C8a	C8a	A2A997;A2A998;Q8K182	Complement component 8, alpha polypeptide;Complement component 8, alpha polypeptide;Complement component C8 alpha chain	1.43622	10.794	0.00451734	0.0537513	3.75528	-2.05213
Kid. Cortex	Mouse	Szt2	Szt2	A2A9C3	KICSTOR complex protein SZT2	-0.035226	9.61359	0.652765	0.818876	-0.465307	-6.51807
Kid. Cortex	Mouse	Kdf1	Kdf1	A2A9F4;A8Y5H9	Keratinocyte differentiation factor 1	-0.115252	10.5898	0.282943	0.521611	-1.14195	-5.97057
Kid. Cortex	Mouse	Cnksr1	Cnksr1	A2A9K7	Connector enhancer of kinase suppressor of Ras 1	-0.471158	9.44989	0.0363163	0.167493	-2.45733	-4.12437
Kid. Cortex	Mouse	Cdk11b	Cdk11b	A2A9P6;P24788	Cyclin-dependent kinase 11B	0.177366	12.4263	0.0742617	0.249046	2.01882	-4.80541
Kid. Cortex	Mouse	Nrd1	Nrd1;Nrdc	A2A9Q2;Q8BHG1	Nardilysin, N-arginine dibasic convertase, NRD convertase 1;Nardilysin	0.0181156	13.1538	0.752327	0.875408	0.325385	-6.57741
Kid. Cortex	Mouse	Kctd2	Kctd2	A2A9V9;F6SH71;Q4VBE7	Potassium channel tetramerisation domain containing 2;Potassium channel tetramerisation domain containing 2 (Fragment);Potassium channel tetramerisation domain containing 2	0.575906	8.91702	0.0273288	0.143273	2.9001	-3.45251
Kid. Cortex	Mouse	Gga3	Gga3	A2A9W7;Q8BMI3	Golgi associated, gamma adaptin ear containing, ARF binding protein 3;ADP-ribosylation factor-binding protein GGA3	-0.0161784	12.7918	0.788972	0.89721	-0.275742	-6.59355
Kid. Cortex	Mouse	Szrd1	Szrd1	A2AA85;Q6NXN1	SUZ domain-containing protein 1 (Fragment);SUZ domain-containing protein 1	0.163179	11.6869	0.361063	0.594761	0.962248	-6.15396
Kid. Cortex	Mouse	Bltp1	Bltp1	A2AAE1	Bridge-like lipid transfer protein family member 1	-0.0645402	10.7076	0.268774	0.506061	-1.17861	-5.93026
Kid. Cortex	Mouse	Slc25a14	Slc25a14	A0A0A0MQJ8;Q9Z2B2	Solute carrier family 25 (mitochondrial carrier, brain), member 14;Brain mitochondrial carrier protein 1	0.515854	10.7599	0.0504543	0.19995	3.17043	-3.44554
Kid. Cortex	Mouse	Exoc7	Exoc7	A2AAN0;O35250	Exocyst complex component 7	-0.0706673	13.244	0.377037	0.609056	-0.929192	-6.18497
Kid. Cortex	Mouse	Arhgap27	Arhgap27	A2AB59	Rho GTPase-activating protein 27	0.118807	12.7717	0.116611	0.32187	1.73583	-5.21926
Kid. Cortex	Mouse	Bltp1	Bltp1	A2AB97;F6RPM4;F6YAT5	RIKEN cDNA 4932438A13 gene (Fragment)	-1.22676	11.7184	0.0275173	0.143902	-5.90167	-2.75512
Kid. Cortex	Mouse	Cep112	Cep112	A2ABQ5;I7HPW3;J3JS86;Q5PR68;S4R1I4	Centrosomal protein 112 (Fragment);Centrosomal protein 112 (Fragment);Centrosomal protein 112;Centrosomal protein of 112 kDa;Centrosomal protein 112		8.78734
Kid. Cortex	Mouse	Med14	Med14	A2ABV5	Mediator of RNA polymerase II transcription subunit 14	0.205526	10.3208	0.249264	0.48763	1.23172	-5.87023
Kid. Cortex	Mouse	Pcyt2	Pcyt2	A2ABY3;Q922E4	ethanolamine-phosphate cytidylyltransferase;Ethanolamine-phosphate cytidylyltransferase	-0.193481	13.7445	0.0185905	0.116029	-2.8662	-3.46866
Kid. Cortex	Mouse	Pycr1	Pycr1	A2ABZ3	Pyrroline-5-carboxylate reductase 1 (Fragment)	-0.158963	9.22879	0.147288	0.366242	-1.58561	-5.4267
Kid. Cortex	Mouse	Lbp	Lbp	A2AC65;Q61805	Lipopolysaccharide-binding protein	0.321007	11.0806	0.222943	0.457748	1.32128	-5.71327
Kid. Cortex	Mouse	Ralgapb	Ralgapb	A2ACC6;E9Q0J2;F8WHN4;Q8BQZ4	Ral GTPase activating protein, beta subunit (non-catalytic);Ral GTPase activating protein, beta subunit (non-catalytic);Ral GTPase activating protein, beta subunit (non-catalytic);Ral GTPase-activating protein subunit beta	-0.0156448	12.4142	0.792112	0.898871	-0.271526	-6.5948
Kid. Cortex	Mouse	Ttc39a	Ttc39a	A2ACP1	Tetratricopeptide repeat protein 39A	0.535834	10.5901	0.138343	0.354617	1.70881	-5.09662
Kid. Cortex	Mouse	C1d	C1d	A0A0A0MQK7;O35473	Nuclear nucleic acid-binding protein C1D (Fragment);Nuclear nucleic acid-binding protein C1D	0.438946	8.00241	0.341332	0.57661	1.03323	-5.82926
Kid. Cortex	Mouse	Dhx35	Dhx35	A2ACQ1;Q8K1G9	RNA helicase	-0.113831	10.3518	0.207716	0.441414	-1.35738	-5.72094
Kid. Cortex	Mouse	Nudt6	Nudt6	A2ACU7;Q3ULU4;Q8CH40;Q8CH41	Nucleoside diphosphate-linked moiety X motif 6	-0.744149	10.3482	0.00558947	0.0605576	-3.61791	-2.26702
Kid. Cortex	Mouse	Soga1	Soga1	A2ACV6	Suppressor of glucose, autophagy associated 1	0.516944	11.3041	0.0225608	0.128476	2.74769	-3.65957
Kid. Cortex	Mouse	Chm	Chm	A2AD03;Q9QXG2	Rab proteins geranylgeranyltransferase component A;Rab proteins geranylgeranyltransferase component A 1	-0.0369046	14.788	0.721987	0.859084	-0.367155	-6.56183
Kid. Cortex	Mouse	Stk26	Stk26	A2AD84;Q99JT2	Serine/threonine kinase 26;Serine/threonine-protein kinase 26	-0.172601	10.6676	0.257012	0.494765	-1.21024	-5.89474
Kid. Cortex	Mouse	Pusl1	Pusl1	A2ADA5	tRNA pseudouridine synthase-like 1	-0.117201	11.3343	0.366265	0.599086	-0.951367	-6.16427
Kid. Cortex	Mouse	Spen	Spen	A2ADB0;A2ADB1;Q62504	Spen family transcription repressor;Spen family transcription repressor;Msx2-interacting protein	0.16779	10.2755	0.0666127	0.233414	2.086	-4.70363
Kid. Cortex	Mouse	Plekhm2	Plekhm2	A2ADE0;Q80TQ5;Z4YJW6	Pleckstrin homology domain containing, family M (with RUN domain) member 2;Pleckstrin homology domain-containing family M member 2;Pleckstrin homology domain containing, family M (with RUN domain) member 2	0.0995229	9.34707	0.425565	0.656108	0.834553	-6.26875
Kid. Cortex	Mouse	Slc25a34	Slc25a34	A2ADF7	Solute carrier family 25 member 34	-0.145284	11.7644	0.2782	0.515961	-1.15406	-5.95736
Kid. Cortex	Mouse	Magt1	Magt1	A2ADH1;Q9CQY5	Magnesium transporter 1;Magnesium transporter protein 1	0.0364479	13.2779	0.815911	0.910577	0.239729	-6.60361
Kid. Cortex	Mouse	Tmem53	Tmem53	A0A0A0MQK8;Q9D0Z3	Transmembrane protein 53 (Fragment);Transmembrane protein 53	-0.178783	10.0644	0.123424	0.332658	-1.69959	-5.27018
Kid. Cortex	Mouse	Tyrp1	Tyrp1	A2ADJ4;P07147	Tyrosinase-related protein 1 (Fragment);5,6-dihydroxyindole-2-carboxylic acid oxidase	-0.123785	11.3678	0.559732	0.761783	-0.605612	-6.43862
Kid. Cortex	Mouse	Ppp1r8	Ppp1r8	A2ADR8;Q8R3G1	Protein phosphatase 1, regulatory subunit 8;Nuclear inhibitor of protein phosphatase 1	0.013307	11.632	0.890585	0.94863	0.141509	-6.62397
Kid. Cortex	Mouse	Ddi2	Ddi2	A2ADY9	Protein DDI1 homolog 2	0.00491568	12.9754	0.962404	0.981714	0.0484654	-6.63361
Kid. Cortex	Mouse	Ampd2	Ampd2	A2AE27	AMP deaminase	0.229425	12.2739	0.0286944	0.147385	2.60091	-3.89529
Kid. Cortex	Mouse	Morf4l2	Morf4l2	A2AEB3;A2AEB4;Q9R0Q4	Mortality factor 4 like 2 (Fragment);Mortality factor 4 like 2 (Fragment);Mortality factor 4-like protein 2	0.409636	10.3475	0.00638947	0.0649588	3.53239	-2.40178
Kid. Cortex	Mouse	Tceal3	Tceal3;Tceal3;Tceal6	A2AEC2;Q8R0A5;Q9DB24	Transcription elongation factor A (SII)-like 3 (Fragment);Transcription elongation factor A protein-like 3;Transcription elongation factor A (SII)-like 6	0.441409	10.6405	0.115553	0.320154	1.74163	-5.21106
Kid. Cortex	Mouse	Spata6	Spata6	A2AED8;Q3U6K5	Spermatogenesis associated 6;Spermatogenesis-associated protein 6	0.275519	10.0421	0.0635285	0.227115	2.15247	-4.5758
Kid. Cortex	Mouse	Ofd1	Ofd1	A2AEG2;Q80Z25	OFD1, centriole and centriolar satellite protein;Centriole and centriolar satellite protein OFD1	2.45272	4.76891	0.126448	0.3359	1.77383	-5.01212
Kid. Cortex	Mouse	Gpm6b	Gpm6b	A2AEG3;A2AEG6;P35803	Glycoprotein m6b;Glycoprotein m6b;Neuronal membrane glycoprotein M6-b	-0.172056	11.1072	0.230305	0.46505	-1.2867	-5.80612
Kid. Cortex	Mouse	Clcc1	Clcc1	A2AEM2;Q99LI2	Chloride channel CLIC-like protein 1	-0.0179181	12.2536	0.760632	0.879714	-0.314061	-6.58132
Kid. Cortex	Mouse	Eif5a	Eif5a	A0A0A0MQM0;P63242	Eukaryotic translation initiation factor 5A (Fragment);Eukaryotic translation initiation factor 5A-1	-0.293939	15.217	0.00771056	0.0710729	-3.41315	-2.59079
Kid. Cortex	Mouse	Gm5938	Gm5938	A2AEN9	Predicted gene 5938	-0.92871	9.23288	0.00724274	0.0692919	-4.36675	-1.95342
Kid. Cortex	Mouse	Obp1b	Obp1b;Gm14743	A2AEP0;A2BHD2	Odorant-binding protein 1b;Predicted gene 14743	-0.157117	10.6686	0.490646	0.710621	-0.722361	-6.30432
Kid. Cortex	Mouse	Tfe3	Tfe3	A2AEW0;A2AEW1;Q64092	Transcription factor E3	1.07572	9.94312	0.00336045	0.045886	3.94881	-1.75305
Kid. Cortex	Mouse	Fhl1	Fhl1	A2AEX6;A2AEX8;P97447	Four and a half LIM domains 1;Four and a half LIM domains 1;Four and a half LIM domains protein 1	0.0141829	13.6542	0.948787	0.97529	0.0660435	-6.63251
Kid. Cortex	Mouse	Tmsb15b2	Tmsb15b2;Tmsb15b1;Tmsb15l	A2AF31;A2AF33;Q8C0W0	Thymosin beta;Thymosin beta;Thymosin beta 15b like	-0.197819	12.3668	0.232341	0.468369	-1.28062	-5.81331
Kid. Cortex	Mouse	Dock11	Dock11	A2AF47	Dedicator of cytokinesis protein 11	-1.18901	8.79988	0.0292157	0.148351	-5.72005	-2.79252
Kid. Cortex	Mouse	Tmem185a	Tmem185a;Tmem185a;Tmem185b	A2AF53;Q3TYW3;Q8R3R5	Transmembrane protein 185A;Transmembrane protein 185A;Transmembrane protein 185B	0.0236851	7.63562	0.986488	0.994103	0.0180165	-6.24568
Kid. Cortex	Mouse	L1cam	L1cam	A2AFG7;A2AFG8	L1 cell adhesion molecule	-0.0773629	12.4283	0.451697	0.678079	-0.786658	-6.30822
Kid. Cortex	Mouse	Mtg2	Mtg2	A2AFK4	Mitochondrial ribosome associated GTPase 2	-1.59178	9.52288	0.216354	0.450628	-1.32962	-5.75476
Kid. Cortex	Mouse	Huwe1	Huwe1	A2AFQ0;Q7TMY8	HECT-type E3 ubiquitin transferase;E3 ubiquitin-protein ligase HUWE1	0.0364118	13.2663	0.510586	0.726775	0.68502	-6.38518
Kid. Cortex	Mouse	Matn2	Matn2	A0A0A0MQM7;O08746	Matrilin 2;Matrilin-2	0.473827	11.3966	0.00274893	0.0404253	4.08214	-1.54973
Kid. Cortex	Mouse	Gemin5	Gemin5	A2AFQ9;E9PUU4;Q8BX17	Gem nuclear organelle associated protein 5;Gem nuclear organelle associated protein 5;Gem-associated protein 5	0.0449993	11.4771	0.571576	0.769173	0.587088	-6.45023
Kid. Cortex	Mouse	Ttc17	Ttc17	A2AFY7;E9PVB5	Tetratricopeptide repeat domain 17;Tetratricopeptide repeat protein 17	-0.347998	10.7633	0.075908	0.252159	-2.03799	-4.745
Kid. Cortex	Mouse	Dnajb5	Dnajb5	A2AG30;O89114	DnaJ heat shock protein family (Hsp40) member B5;DnaJ homolog subfamily B member 5		9.22504
Kid. Cortex	Mouse	Pigo	Pigo	A2AG36;Q562G0	GPI ethanolamine phosphate transferase 3	-0.0501361	11.2763	0.619065	0.79831	-0.514846	-6.49225
Kid. Cortex	Mouse	Atp7a	Atp7a	A2AG68;Q64430	P-type Cu(+) transporter;Copper-transporting ATPase 1	-0.0201244	12.0569	0.813992	0.909727	-0.242283	-6.60294
Kid. Cortex	Mouse	Psmd10	Psmd10	A2AG83;Q9Z2X2	Proteasome (prosome, macropain) 26S subunit, non-ATPase, 10;26S proteasome non-ATPase regulatory subunit 10	0.529659	10.2438	0.296099	0.532431	1.1092	-6.00578
Kid. Cortex	Mouse	Ccdc163	Ccdc163	A2AGD6;A2AGD7;A8Y5M7;A8Y5M8;A8Y5M9;I6L983	Coiled-coil domain containing 163 (Fragment);Coiled-coil domain containing 163;Coiled-coil domain containing 163;Coiled-coil domain containing 163 (Fragment);Coiled-coil domain containing 163;0610037D15Rik protein	0.472253	11.3397	0.0350305	0.164471	2.53408	-3.99861
Kid. Cortex	Mouse	Tesk2	Tesk2	A2AGD9;Q8VCT9	Testis-specific kinase 2;Dual specificity testis-specific protein kinase 2	-0.00470996	9.97622	0.980701	0.9907	-0.0250674	-6.50729
Kid. Cortex	Mouse	Med12	Med12	A2AGH6;A2AGH8;A2AGH9	Mediator of RNA polymerase II transcription subunit 12;Mediator complex subunit 12;Mediator complex subunit 12	-0.0323079	9.94971	0.649105	0.816912	-0.470624	-6.51542
Kid. Cortex	Mouse	Aven	Aven	A2AGL5;Q9D9K3	Apoptosis, caspase activation inhibitor;Cell death regulator Aven	-0.0490005	11.1828	0.693828	0.843478	-0.406562	-6.54545
Kid. Cortex	Mouse	Krtcap2	Krtcap2	A0A0A0MQN1;Q5RL79	Keratinocyte-associated protein 2	0.225114	10.9184	0.167178	0.390975	1.50265	-5.53682
Kid. Cortex	Mouse	Trp53i11	Trp53i11	A2AGS6;Q4QQM4	Tumor protein p53-inducible protein 11 (Fragment);Tumor protein p53-inducible protein 11	0.132597	9.79136	0.649604	0.816912	0.469899	-6.51578
Kid. Cortex	Mouse	Ambra1	Ambra1	A2AH22	Activating molecule in BECN1-regulated autophagy protein 1	0.0720833	9.14721	0.734582	0.866423	0.349734	-6.56855
Kid. Cortex	Mouse	Arhgap1	Arhgap1	A2AH25;Q5FWK3	Rho GTPase activating protein 1;Rho GTPase-activating protein 1	0.106778	14.5763	0.257566	0.495332	1.20872	-5.89646
Kid. Cortex	Mouse	Lzts3	Lzts3	A2AHG0	Leucine zipper putative tumor suppressor 3	-0.249822	11.5915	0.00933757	0.0788975	-3.29269	-2.78288
Kid. Cortex	Mouse	Large2	Large2	A2AHG6;Q14AT0;Q5XPT3	LARGE xylosyl- and glucuronyltransferase 2;Gyltl1b protein;Xylosyl- and glucuronyltransferase LARGE2	0.238147	9.78206	0.326206	0.563033	1.03833	-6.0793
Kid. Cortex	Mouse	Dgkz	Dgkz	A2AHJ7	Diacylglycerol kinase	0.143261	11.1321	0.168027	0.392227	1.4993	-5.54119
Kid. Cortex	Mouse	Phka2	Phka2	A2AHQ7;Q8BWJ3	Phosphorylase b kinase regulatory subunit;Phosphorylase b kinase regulatory subunit alpha, liver isoform	-0.0884517	10.6598	0.186537	0.415714	-1.42986	-5.63053
Kid. Cortex	Mouse	Acbd4	Acbd4	A2AHR2	Acyl-Coenzyme A binding domain containing 4	-0.153549	10.0658	0.636613	0.80944	-0.50257	-5.99795
Kid. Cortex	Mouse	Siah1b	Siah1b;Siah1a;Siah1b;Siah2	A2AHZ2;P61092;Q06985;Q06986	E3 ubiquitin-protein ligase;E3 ubiquitin-protein ligase SIAH1A;E3 ubiquitin-protein ligase SIAH1B;E3 ubiquitin-protein ligase SIAH2	-0.095832	10.6694	0.47593	0.698968	-0.743863	-6.34177
Kid. Cortex	Mouse	Tprn	Tprn	A2AI08	Taperin	-0.231817	11.0922	0.103077	0.300528	-1.81401	-5.10766
Kid. Cortex	Mouse	Ighv5-9-1	Ighv5-9-1	A0A075B5Q6;A0A0A6YVS4	Immunoglobulin heavy variable 5-9-1;Immunoglobulin heavy variable 5-9-1 (Fragment)		10.5459
Kid. Cortex	Mouse	Cetn4	Cetn4	A0A0A0MQN3;Q8K4K1	Centrin 4;Centrin-4	-0.175832	12.0084	0.0452079	0.18836	-2.32373	-4.33546
Kid. Cortex	Mouse	Usp8	Usp8	A2AI52;Q80U87	ubiquitinyl hydrolase 1;Ubiquitin carboxyl-terminal hydrolase 8	0.17008	12.2253	0.302659	0.540203	1.0933	-6.0226
Kid. Cortex	Mouse	Trpm7	Trpm7	A2AI57;Q923J1	non-specific serine/threonine protein kinase;Transient receptor potential cation channel subfamily M member 7	-0.112237	10.9479	0.196667	0.427326	-1.39436	-5.67519
Kid. Cortex	Mouse	Phka1	Phka1	A2AI87;A2AI88;A2AI89;A2AI91;P18826	Phosphorylase b kinase regulatory subunit;Phosphorylase b kinase regulatory subunit;Phosphorylase b kinase regulatory subunit;Phosphorylase b kinase regulatory subunit;Phosphorylase b kinase regulatory subunit alpha, skeletal muscle isoform	0.089731	9.98211	0.762851	0.881087	0.311044	-6.58234
Kid. Cortex	Mouse	Accs	Accs	A2AIG8	1-aminocyclopropane-1-carboxylate synthase-like protein 1	-0.0257995	10.9412	0.83838	0.923555	-0.209954	-6.61088
Kid. Cortex	Mouse	Pir	Pir	A2AIH8;Q9D711	Pirin (Fragment);Pirin	0.618804	10.4266	0.00410339	0.0505172	3.8178	-1.95503
Kid. Cortex	Mouse	Ndufaf6	Ndufaf6	A2AIL4	NADH dehydrogenase (ubiquinone) complex I, assembly factor 6	-0.24116	11.7437	0.259715	0.497456	-1.20287	-5.90308
Kid. Cortex	Mouse	Tpm2	Tpm2	A2AIM4	Tropomyosin 2, beta	0.42598	14.9931	0.0188211	0.116917	2.85864	-3.48085
Kid. Cortex	Mouse	Arrdc1	Arrdc1	A2AIS9;Q99KN1	Arrestin domain containing 1 (Fragment);Arrestin domain-containing protein 1	0.0783384	12.5432	0.478665	0.701208	0.739121	-6.34538
Kid. Cortex	Mouse	Ttpa	Ttpa	A2AIT6;Q8BWP5	Tocopherol (alpha) transfer protein;Alpha-tocopherol transfer protein	-0.336308	11.3551	0.0703011	0.242504	-2.05273	-4.75418
Kid. Cortex	Mouse	Pax8	Pax8	A2AIU6;A2AIU7;G3UZ49;Q00288	Paired box 8 (Fragment);Paired box 8 (Fragment);Paired box 8;Paired box protein Pax-8	0.0366627	11.4342	0.677328	0.832727	0.42997	-6.53497
Kid. Cortex	Mouse	Atg7	Atg7	A0A0A0MQN4;Q9D906	Ubiquitin-like modifier-activating enzyme ATG7	0.133747	12.015	0.0824879	0.263974	1.95359	-4.90307
Kid. Cortex	Mouse	Virma	Virma	A2AIV2;E9PZY8	Protein virilizer homolog;Vir like m6A methyltransferase associated	0.126072	11.0383	0.0568047	0.213379	2.18397	-4.55328
Kid. Cortex	Mouse	Entr1	Entr1	A2AIW0;A2AIW3	Endosome-associated-trafficking regulator 1	0.191258	8.99393	0.226324	0.460929	1.29873	-5.79185
Kid. Cortex	Mouse	Man1b1	Man1b1	A2AJ15	Endoplasmic reticulum mannosyl-oligosaccharide 1,2-alpha-mannosidase	0.152028	11.1788	0.0922188	0.28144	1.88397	-5.00592
Kid. Cortex	Mouse	Abca2	Abca2	A2AJ26;P41234	ATP-binding cassette, sub-family A (ABC1), member 2;ATP-binding cassette sub-family A member 2	0.009284	12.7742	0.893093	0.948743	0.138242	-6.62447
Kid. Cortex	Mouse	Clic3	Clic3	A2AJ28;Q9D7P7	Chloride intracellular channel 3;Chloride intracellular channel protein 3	-0.0424735	10.9402	0.681039	0.835391	-0.424683	-6.53738
Kid. Cortex	Mouse	Fubp3	Fubp3	A2AJ72	Far upstream element (FUSE) binding protein 3	0.0863686	14.0857	0.194847	0.425228	1.40062	-5.66737
Kid. Cortex	Mouse	Pnpla7	Pnpla7	A2AJ88	Patatin-like phospholipase domain-containing protein 7	-0.0865684	11.7287	0.41138	0.641901	-0.861398	-6.24575
Kid. Cortex	Mouse	Mamdc4	Mamdc4	A2AJA7;D3YY20;F6QNH6	Apical endosomal glycoprotein;MAM domain containing 4;MAM domain containing 4 (Fragment)	-1.44128	3.23834	0.644434	0.814494	-0.490668	-6.19733
Kid. Cortex	Mouse	Rpp38	Rpp38	A2AJG0;Q80UU2	Ribonuclease P/MRP 38 subunit;Ribonuclease P protein subunit p38	0.1765	10.5077	0.0429801	0.182795	2.35458	-4.28693
Kid. Cortex	Mouse	Nmt2	Nmt2	A2AJH3;O70311	Glycylpeptide N-tetradecanoyltransferase;Glycylpeptide N-tetradecanoyltransferase 2	0.0708192	11.1288	0.432947	0.661722	0.820826	-6.28026
Kid. Cortex	Mouse	Ttc28	Ttc28	A0A0A0MQN9;Q80XJ3	Tetratricopeptide repeat domain 28;Tetratricopeptide repeat protein 28	0.267294	9.79257	0.00171876	0.0314593	4.40057	-1.0739
Kid. Cortex	Mouse	Map7d1	Map7d1	A2AJI0	MAP7 domain-containing protein 1	0.660656	11.2259	0.000172796	0.0117248	6.13008	1.24356
Kid. Cortex	Mouse	Fggy	Fggy	A2AJL3	FGGY carbohydrate kinase domain-containing protein	-0.285209	13.8485	0.0497599	0.198187	-2.26509	-4.42727
Kid. Cortex	Mouse	Tmem67	Tmem67	A2AJP5;E9QNI1;Q8BR76	Transmembrane protein 67;Transmembrane protein 67;Meckelin	-0.163579	10.2682	0.301386	0.538933	-1.09636	-6.01938
Kid. Cortex	Mouse	Pdp1	Pdp1	A2AJP9;A2AJQ0;A8Y5Q0;Q3UV70	Pyruvate dehydrogenase phosphatase catalytic subunit 1;Pyruvate dehydrogenase phosphatase catalytic subunit 1;Pyruvate dehydrogenase phosphatase catalytic subunit 1;[Pyruvate dehydrogenase [acetyl-transferring]]-phosphatase 1, mitochondrial	0.140491	11.5766	0.120314	0.327537	1.71591	-5.24732
Kid. Cortex	Mouse	Dpy19l4	Dpy19l4	A2AJQ3	Probable C-mannosyltransferase DPY19L4	0.197975	11.1747	0.243324	0.481227	1.24856	-5.8508
Kid. Cortex	Mouse	Pnisr	Pnisr	A2AJT4;A2AJT5	Arginine/serine-rich protein PNISR;PNN interacting serine/arginine-rich	-0.0561311	9.76643	0.69164	0.842001	-0.409651	-6.5441
Kid. Cortex	Mouse	Ppp1r3d	Ppp1r3d	A2AJW4	Protein phosphatase 1 regulatory subunit	1.1897	9.88791	0.0113839	0.0882834	3.16898	-2.98112
Kid. Cortex	Mouse	Col15a1	Col15a1	A2AJY2;O35206	Collagen, type XV, alpha 1;Collagen alpha-1(XV) chain	0.399319	13.4657	0.00318302	0.0441592	3.98466	-1.69816
Kid. Cortex	Mouse	Dcaf10	Dcaf10	A2AKB9	DDB1- and CUL4-associated factor 10	0.222791	9.73189	0.267746	0.505524	1.18133	-5.92724
Kid. Cortex	Mouse	Snta1	Snta1	A2AKD7	Syntrophin, acidic 1	-0.145735	13.3626	0.0457324	0.189036	-2.31668	-4.34652
Kid. Cortex	Mouse	Fbxo28	Fbxo28	A0A0A6YVQ6;Q8BIG4	F-box protein 28;F-box only protein 28	0.255237	8.22568	0.456245	0.681994	0.788549	-6.17497
Kid. Cortex	Mouse	Focad	Focad	A2AKG8;E9PYJ6	Focadhesin	0.0859217	11.5852	0.240165	0.477275	1.25766	-5.84023
Kid. Cortex	Mouse	Lrrc57	Lrrc57	A2AKH7;Q8JZX5;Q9D1G5	Leucine rich repeat containing 57 (Fragment);Leucine rich repeat containing 57;Leucine-rich repeat-containing protein 57	-0.0447787	11.3657	0.671844	0.829717	-0.437808	-6.53133
Kid. Cortex	Mouse	Acnat1	Acnat1	A2AKK5	Acyl-coenzyme A amino acid N-acyltransferase 1	-0.156207	14.7805	0.563666	0.764305	-0.599435	-6.44253
Kid. Cortex	Mouse	Mup2	Mup2;Mup18;Mup1;Mup15;Mup6;Mup11;Mup1	A2AKN9;A2BIM8;A2CEL1;A9R9W0;P02762;P04938;P11588	Major urinary protein 2;Major urinary protein 18;Major urinary protein 1;Major urinary protein 15;Major urinary protein 6;Major urinary protein 11;Major urinary protein 1	1.50406	15.124	0.014127	0.100033	3.03518	-3.19633
Kid. Cortex	Mouse	Alkbh3	Alkbh3	A2AKV6;Q8K1E6	AlkB homolog 3, alpha-ketoglutarate-dependent dioxygenase;Alpha-ketoglutarate-dependent dioxygenase alkB homolog 3	0.0358869	10.7918	0.74328	0.871044	0.337772	-6.57298
Kid. Cortex	Mouse	Slc25a51	Slc25a51	A2AKW0;Q5HZI9	Solute carrier family 25, member 51;Mitochondrial nicotinamide adenine dinucleotide transporter SLC25A51	-0.175072	13.7041	0.0412748	0.178489	-2.37929	-4.24797
Kid. Cortex	Mouse	Agps	Agps	A2AL50;Q8C0I1	Alkylglycerone-phosphate synthase;Alkyldihydroxyacetonephosphate synthase, peroxisomal	0.123581	13.7277	0.853623	0.930284	0.189871	-6.61525
Kid. Cortex	Mouse	Asph	Asph	A2AL85;Q8BSY0	Aspartate-beta-hydroxylase;Aspartyl/asparaginyl beta-hydroxylase	0.0863609	13.5148	0.235944	0.472614	1.26997	-5.82584
Kid. Cortex	Mouse	Med22	Med22	A2ALA4;Q62276	Mediator of RNA polymerase II transcription subunit 22 (Fragment);Mediator of RNA polymerase II transcription subunit 22	-0.00944658	10.4155	0.905805	0.955524	-0.121707	-6.62681
Kid. Cortex	Mouse	Rexo4	Rexo4	A2ALB1;A2ALB2;Q6PAQ4	RNA exonuclease 4 (Fragment);RNA exonuclease 4;RNA exonuclease 4	0.233957	10.2954	0.142697	0.360469	1.60617	-5.3989
Kid. Cortex	Mouse	Surf1	Surf1	A0A0A6YVR9;P09925	SURF1-like protein (Fragment);Surfeit locus protein 1	-0.201241	12.8083	0.0386244	0.172184	-2.41976	-4.18396
Kid. Cortex	Mouse	Pax1	Pax1	A2ALK0;P09084	Paired box 1 (Fragment);Paired box protein Pax-1	0.435877	7.80809	0.17547	0.401249	1.48644	-5.50896
Kid. Cortex	Mouse	Ptpn3	Ptpn3	A2ALK8	Tyrosine-protein phosphatase non-receptor type 3	-0.270347	11.4131	0.0112944	0.0878839	-3.17389	-2.97324
Kid. Cortex	Mouse	Usp48	Usp48	A2ALR9;Q3V0C5	ubiquitinyl hydrolase 1;Ubiquitin carboxyl-terminal hydrolase 48	0.133591	10.819	0.168634	0.392876	1.49692	-5.5443
Kid. Cortex	Mouse	Rap1gap	Rap1gap	A2ALS4	Rap1 GTPase-activating protein	-1.01762	10.4661	0.00165716	0.031233	-6.14577	-0.587655
Kid. Cortex	Mouse	Rap1gap	Rap1gap	A2ALS5	Rap1 GTPase-activating protein 1	-0.36538	12.2679	0.00707055	0.068277	-3.468	-2.5037
Kid. Cortex	Mouse	Rap1gap	Rap1gap	A2ALS7	Rap1 GTPase-activating protein (Fragment)	-0.229799	11.0241	0.0936709	0.283962	-1.87418	-5.02026
Kid. Cortex	Mouse	Shroom2	Shroom2	A2ALU4;A7TU71	Protein Shroom2;SHROOM2	-0.0932295	11.6897	0.253426	0.491235	-1.22011	-5.88351
Kid. Cortex	Mouse	Sh3gl2	Sh3gl2	A2ALV3;Q62420;Q8BXU5	SH3-domain GRB2-like 2;Endophilin-A1;SH3-domain GRB2-like 2	-0.110522	12.1715	0.375037	0.60718	-0.933275	-6.18119
Kid. Cortex	Mouse	Dnajc25	Dnajc25	A2ALW5	DnaJ homolog subfamily C member 25	-0.196065	8.87496	0.889465	0.948455	-0.142968	-6.62374
Kid. Cortex	Mouse	Hp1bp3	Hp1bp3	A2AM70	Heterochromatin protein 1, binding protein 3 (Fragment)	-0.314237	8.74544	0.110875	0.313112	-1.79213	-5.09807
Kid. Cortex	Mouse	Tmco1	Tmco1	A0A0A6YVS2;Q921L3	Calcium load-activated calcium channel (Fragment);Calcium load-activated calcium channel	0.0815081	13.3114	0.612049	0.793998	0.525329	-6.48648
Kid. Cortex	Mouse	Pink1	Pink1	A2AM78;Q99MQ3	non-specific serine/threonine protein kinase;Serine/threonine-protein kinase PINK1, mitochondrial	-0.443229	8.90389	0.116519	0.32184	-1.83288	-4.8831
Kid. Cortex	Mouse	Pofut1	Pofut1	A2AMC3;Q91ZW2	GDP-fucose protein O-fucosyltransferase 1	0.131339	11.5948	0.151172	0.37131	1.56866	-5.44948
Kid. Cortex	Mouse	Slc44a1	Slc44a1	A2AMH5	Choline transporter-like protein	-0.236679	13.053	0.119243	0.325926	-1.72161	-5.23931
Kid. Cortex	Mouse	Galt	Galt	A2AMS3;Q03249	Galactose-1-phosphate uridylyltransferase	-0.284196	12.9271	0.00382142	0.0486346	-3.86432	-1.88307
Kid. Cortex	Mouse	Capzb	Capzb	A2AMW0	F-actin-capping protein subunit beta	0.0410673	11.8363	0.783228	0.894648	0.283472	-6.59121
Kid. Cortex	Mouse	Ubap2	Ubap2	A2AMY5;Q91VX2	Ubiquitin-associated protein 2	0.0679687	10.9362	0.565495	0.765044	0.596571	-6.44433
Kid. Cortex	Mouse	Ubr4	Ubr4	A2AN08	E3 ubiquitin-protein ligase UBR4	0.0369251	13.0692	0.526797	0.738482	0.658344	-6.4038
Kid. Cortex	Mouse	Ciz1	Ciz1	A2AN61;Q8VEH2	CDKN1A interacting zinc finger protein 1	0.0153496	10.2604	0.962943	0.981714	0.0477694	-6.63365
Kid. Cortex	Mouse	Ap5s1	Ap5s1	A2ANC6	Adaptor-related protein 5 complex, sigma 1 subunit	0.235492	10.2975	0.215588	0.44977	1.33205	-5.75182
Kid. Cortex	Mouse	Fam219a	Fam219a	A2ANP1	2310028H24Rik protein	0.242036	10.1378	0.0233815	0.13078	2.72586	-3.6947
Kid. Cortex	Mouse	Adrm1b	Adrm1b;Adrm1	A0A0A6YVU8;Q9JKV1	Predicted pseudogene 9774;Proteasomal ubiquitin receptor ADRM1	0.195521	10.7065	0.248185	0.486417	1.23476	-5.86674
Kid. Cortex	Mouse	Anks6	Anks6	A2ANT9;Q6GQX6	Ankyrin repeat and sterile alpha motif domain containing 6;Ankyrin repeat and SAM domain-containing protein 6	-0.44536	9.89448	0.0963527	0.289058	-1.85647	-5.04612
Kid. Cortex	Mouse	Galnt12	Galnt12	A2ANU2;Q8BGT9	Polypeptide N-acetylgalactosaminyltransferase 12	1.34813	7.12413	0.00187437	0.0327753	4.84142	-0.910246
Kid. Cortex	Mouse	Atp8b4	Atp8b4	A2ANX3	Phospholipid-transporting ATPase	-0.0601576	12.4715	0.783727	0.894676	-0.282799	-6.59141
Kid. Cortex	Mouse	Mdn1	Mdn1	A2ANY6;J3QMC5	Midasin	0.0616982	10.5317	0.496861	0.714481	0.708014	-6.36859
Kid. Cortex	Mouse	C9orf72	C9orf72	A2ANZ2;Q6DFW0	C9orf72, member of C9orf72-SMCR8 complex;Guanine nucleotide exchange factor C9orf72 homolog	0.0819805	10.085	0.387342	0.618799	0.908404	-6.20402
Kid. Cortex	Mouse	Cd99l2	Cd99l2	A2AP74;I7HJQ8;Q8BIF0	CD99 antigen-like 2;CD99 antigen-like 2;CD99 antigen-like protein 2	-0.0447309	11.6284	0.470618	0.694128	-0.75312	-6.33465
Kid. Cortex	Mouse	Taf9b	Taf9b	A2AP82;Q6NZA9	TATA-box binding protein associated factor 9B;Transcription initiation factor TFIID subunit 9B	0.589691	9.16595	0.368368	0.60098	1.01296	-5.56819
Kid. Cortex	Mouse	Zc3h6	Zc3h6	A2AP88;Q8BYK8	Zinc finger CCCH type containing 6;Zinc finger CCCH domain-containing protein 6		9.05338
Kid. Cortex	Mouse	Zbp1	Zbp1	A2APF7;Q9QY24	Z-DNA binding protein 1;Z-DNA-binding protein 1	1.23426	9.86698	0.00392247	0.0494512	4.22279	-1.65901
Kid. Cortex	Mouse	Ints8	Ints8	A2API3;Q80V86	Integrator complex subunit 8	0.295901	10.4697	0.0118931	0.0902166	3.14178	-3.02481
Kid. Cortex	Mouse	Capn8	Capn8	A0A0A6YVU9;A0A0R4J0K6;Q91VA3	Calpain 8;Calpain 8;Calpain-8	-0.260255	11.211	0.199164	0.430536	-1.3997	-5.61805
Kid. Cortex	Mouse	Pakap	Pakap	A2API8	Paralemmin A kinase anchor protein	1.07843	10.7222	0.201416	0.433242	1.37826	-5.69521
Kid. Cortex	Mouse	Cd44	Cd44	A2APM1;A2APM2;A2APM3;A2APM4;A2APM5;E9QKM8;P15379;Q3U8S1;Q80X37	CD44 antigen	1.13945	13.6301	0.000335906	0.0151015	5.59606	0.576898
Kid. Cortex	Mouse	Nphp1	Nphp1	A2APS1;Q3TWM5;Q9QY53	Nephronophthisis 1 (juvenile) homolog (human);Nephronophthisis 1 (juvenile) homolog (human);Nephrocystin-1	-0.163324	9.92927	0.28461	0.523314	-1.14678	-5.91213
Kid. Cortex	Mouse	Klhdc7a	Klhdc7a	A2APT9	Kelch domain-containing protein 7A	-0.218095	13.6671	0.0211736	0.124803	-2.7865	-3.59709
Kid. Cortex	Mouse	Fmnl2	Fmnl2	A2APV2;F8VPR2	Formin-like protein 2;Formin-like 2	0.321048	12.5903	0.00405961	0.0503646	3.8248	-1.94419
Kid. Cortex	Mouse	Cst3	Cst3	A2APX3;P21460	Cystatin C (Fragment);Cystatin-C	0.125453	13.7572	0.312623	0.550049	1.06965	-6.04727
Kid. Cortex	Mouse	Ndufaf5	Ndufaf5	A2APY7	Arginine-hydroxylase NDUFAF5, mitochondrial	-0.584536	11.6418	0.0192634	0.118746	-2.8444	-3.5038
Kid. Cortex	Mouse	Tubb1	Tubb1	A2AQ07	Tubulin beta-1 chain	-0.0120293	9.18821	0.959676	0.980481	-0.0521652	-6.58165
Kid. Cortex	Mouse	Rtf1	Rtf1	A2AQ19	RNA polymerase-associated protein RTF1 homolog	0.184421	11.4685	0.0453145	0.18836	2.32229	-4.33771
Kid. Cortex	Mouse	Skt	Skt;Etl4	A2AQ25;E9QAU4	Sickle tail protein;Enhancer trap locus 4	0.213822	11.782	0.0190888	0.117986	2.84999	-3.4948
Kid. Cortex	Mouse	Cop1	Cop1	A0A0A6YVV7;A0A0A6YXK6;Q9R1A8	COP1, E3 ubiquitin ligase (Fragment);COP1, E3 ubiquitin ligase (Fragment);E3 ubiquitin-protein ligase COP1	0.0284898	9.07231	0.899594	0.952247	0.130237	-6.54217
Kid. Cortex	Mouse	Fnbp1	Fnbp1	A2AQ41;A2AQ42;A2AQ43;A2AQ44;A2AQ45;Q80TY0	Formin binding protein 1;Formin binding protein 1;Formin binding protein 1;Formin binding protein 1;Formin binding protein 1;Formin-binding protein 1	0.338297	11.9637	0.000915353	0.0237072	4.84435	-0.435486
Kid. Cortex	Mouse	Slc12a1	Slc12a1	A2AQ50;A2AQ51;A2AQ52	Solute carrier family 12, member 1;Solute carrier family 12, member 1;Solute carrier family 12, member 1	-0.311458	14.6862	0.103556	0.301526	-1.81108	-5.11188
Kid. Cortex	Mouse	Tmem62	Tmem62	A2AQ56;Q8BXJ9	Transmembrane protein 62	0.231469	9.73988	0.156144	0.377621	1.54751	-5.47769
Kid. Cortex	Mouse	Shf	Shf	A2AQ87;A2AQ88;A2AQ89;Q8CG80	Src homology 2 domain containing F (Fragment);Src homology 2 domain containing F (Fragment);Src homology 2 domain containing F (Fragment);SH2 domain-containing adapter protein F	-0.0112021	9.26844	0.973939	0.987301	-0.0338541	-6.507
Kid. Cortex	Mouse	Atp9a	Atp9a	A2AQC3;O70228;Q8C288;Q8C4G3	Phospholipid-transporting ATPase;Probable phospholipid-transporting ATPase IIA;Phospholipid-transporting ATPase;Phospholipid-transporting ATPase	-0.129538	11.7494	0.213664	0.448159	-1.33817	-5.7444
Kid. Cortex	Mouse	Itprid2	Itprid2	A2AQD5;Q922B9	ITPR interacting domain containing 2;Protein ITPRID2	-0.0648777	12.7441	0.464838	0.689445	-0.763269	-6.32676
Kid. Cortex	Mouse	Secisbp2l	Secisbp2l	A2AQE2;Q6A098	SECIS binding protein 2-like;Selenocysteine insertion sequence-binding protein 2-like	-0.0787978	10.6474	0.619771	0.798841	-0.513794	-6.49283
Kid. Cortex	Mouse	Tmem87a	Tmem87a	A2AQJ5;A2AQJ6;Q8BXN9	Transmembrane protein 87A	0.32239	10.4723	0.120657	0.327911	1.71408	-5.24988
Kid. Cortex	Mouse	Ganc	Ganc	A2AQJ8	Glucosidase, alpha; neutral C	-0.137755	12.5783	0.235295	0.472076	-1.27188	-5.8236
Kid. Cortex	Mouse	Ncoa6	Ncoa6	A2AQM9;A2AQN0;Q5XJV5	Nuclear receptor coactivator 6 (Fragment);Nuclear receptor coactivator 6;Nuclear receptor coactivator 6	-0.74878	9.9254	0.182839	0.411097	-1.45841	-5.54463
Kid. Cortex	Mouse	Mbnl1	Mbnl1	A0A0A6YVV8;A0A0A6YWB0	Muscleblind like splicing factor 1	0.156212	12.6757	0.249981	0.488431	1.22971	-5.87254
Kid. Cortex	Mouse	Acss2	Acss2	A2AQN4;Q9QXG4	propionate--CoA ligase;Acetyl-coenzyme A synthetase, cytoplasmic	-0.0350151	14.8003	0.81609	0.910577	-0.239491	-6.60367
Kid. Cortex	Mouse	Srxn1	Srxn1	A2AQU8;Q9D975	sulfiredoxin;Sulfiredoxin-1	0.188238	11.938	0.132463	0.344476	1.65425	-5.33314
Kid. Cortex	Mouse	Chst14	Chst14	A2AQV2;Q80V53	Carbohydrate sulfotransferase;Carbohydrate sulfotransferase 14	2.31145	8.84718	0.132571	0.344663	1.67446	-5.26058
Kid. Cortex	Mouse	Map3k15	Map3k15	A2AQW0	Mitogen-activated protein kinase kinase kinase 15	-0.0499952	11.3409	0.50029	0.717679	-0.702234	-6.37281
Kid. Cortex	Mouse	Ppig	Ppig	A2AR02	Peptidyl-prolyl cis-trans isomerase G	0.219152	11.7508	0.13606	0.350861	1.63698	-5.35687
Kid. Cortex	Mouse	Tank	Tank	A2AR76;A2AR78;P70347;Q8C2D3	TRAF family member-associated Nf-kappa B activator;TRAF family member-associated Nf-kappa B activator;TRAF family member-associated NF-kappa-B activator;TRAF family member-associated Nf-kappa B activator	0.47136	8.96529	0.0860918	0.270829	2.05123	-4.64311
Kid. Cortex	Mouse	Itga8	Itga8	A2ARA8	Integrin alpha-8	0.729935	11.9997	9.32319e-05	0.00916075	6.65454	1.85752
Kid. Cortex	Mouse	Kynu	Kynu	A2ARD6;Q9CXF0	Kynureninase	-0.380219	12.9234	0.699667	0.847261	-0.398336	-6.549
Kid. Cortex	Mouse	Lgr4	Lgr4	A2ARI4	Leucine-rich repeat-containing G-protein coupled receptor 4	-0.0381613	10.8875	0.835883	0.921977	-0.213252	-6.61012
Kid. Cortex	Mouse	Ppip5k1	Ppip5k1	A2ARP1	Inositol hexakisphosphate and diphosphoinositol-pentakisphosphate kinase 1	-0.0060506	10.9545	0.951736	0.976922	-0.0622344	-6.63278
Kid. Cortex	Mouse	Ighv7-3	Ighv7-3	A0A075B5R2	Immunoglobulin heavy variable 7-3 (Fragment)	0.98204	10.7133	0.0425833	0.181838	2.56561	-3.89863
Kid. Cortex	Mouse	Ildr2	Ildr2	A0A0A6YVY9;A0A0A6YWD2;A0A0A6YXV2;A0A0A6YY76;B5TVM2	Immunoglobulin-like domain-containing receptor 2	0.196694	10.4069	0.111345	0.313881	1.76519	-5.17761
Kid. Cortex	Mouse	Map1a	Map1a	A2ARP8;Q9QYR6	Microtubule-associated protein 1 A;Microtubule-associated protein 1A	0.37538	10.1982	0.106681	0.306813	1.7923	-5.13888
Kid. Cortex	Mouse	Lrp2	Lrp2	A2ARV4	Low-density lipoprotein receptor-related protein 2	-0.429101	16.6229	0.00170086	0.031443	-4.40778	-1.06329
Kid. Cortex	Mouse	Helz2	Helz2	A2AS03;A2AS05;E9QAM5	Helicase with zinc finger 2, transcriptional coactivator;Helicase with zinc finger 2, transcriptional coactivator;Helicase with zinc finger domain 2	0.882346	10.0151	0.000533737	0.0184313	5.24133	0.110044
Kid. Cortex	Mouse	Pkp4	Pkp4	A2AS45	Plakophilin 4	-0.0658757	10.9079	0.564674	0.7645	-0.597855	-6.44352
Kid. Cortex	Mouse	Ankrd16	Ankrd16	A2AS55;D6RGL4	Ankyrin repeat domain-containing protein 16;Ankyrin repeat domain 16	0.0297278	8.3546	0.861798	0.934661	0.179136	-6.6174
Kid. Cortex	Mouse	Mllt10	Mllt10	A2AS70;O54826	Myeloid/lymphoid or mixed-lineage leukemia; translocated to, 10;Protein AF-10	0.326053	9.94572	0.479925	0.701818	0.778172	-5.90736
Kid. Cortex	Mouse	Agmat	Agmat	A2AS89	Agmatinase, mitochondrial	-0.226439	9.83836	0.209735	0.443539	-1.40459	-5.42203
Kid. Cortex	Mouse	Nckap1	Nckap1	A2AS98;P28660	NCK-associated protein 1;Nck-associated protein 1	0.0758947	12.5236	0.270244	0.507189	1.17473	-5.93457
Kid. Cortex	Mouse	Itpripl1	Itpripl1	A2ASA8	Inositol 1,4,5-trisphosphate receptor-interacting protein-like 1	0.0347888	9.8102	0.708943	0.851214	0.386866	-6.50132
Kid. Cortex	Mouse	Hoxd8	Hoxd8	A2ASN1;F6W963;P23463	Homeobox D8;Homeobox D8;Homeobox protein Hox-D8	-0.527405	10.6637	0.0155256	0.105529	-3.06237	-3.19003
Kid. Cortex	Mouse	Enah	Enah	A0A0A6YW06;A0A0A6YXC8;E9QKR1	ENAH actin regulator	-0.0683268	12.5512	0.593051	0.78147	-0.554035	-6.47009
Kid. Cortex	Mouse	Bmi1	Bmi1	A2ASR7;A2ASR8;P25916	Bmi1 polycomb ring finger oncogene (Fragment);Bmi1 polycomb ring finger oncogene (Fragment);Polycomb complex protein BMI-1	-0.174533	8.38178	0.224477	0.459102	-1.38564	-5.21605
Kid. Cortex	Mouse	Ccdc141	Ccdc141	A2AST1;E9Q8Q6	Coiled-coil domain containing 141	-0.180335	11.3478	0.35789	0.591991	-0.96894	-6.14758
Kid. Cortex	Mouse	Slc25a25	Slc25a25	A2ASZ8	Mitochondrial adenyl nucleotide antiporter SLC25A25	-0.112441	13.6469	0.136022	0.350861	-1.63716	-5.35663
Kid. Cortex	Mouse	Upf2	Upf2	A2AT37	Regulator of nonsense transcripts 2	0.0719826	11.4158	0.301335	0.538933	1.09649	-6.01925
Kid. Cortex	Mouse	Plcb4	Plcb4	A2AT91	Phosphoinositide phospholipase C (Fragment)	0.34351	9.09966	0.210162	0.443856	1.37961	-5.56924
Kid. Cortex	Mouse	Gorasp2	Gorasp2	A2ATI9;Q99JX3	Golgi reassembly stacking protein 2;Golgi reassembly-stacking protein 2	0.0923385	13.271	0.242289	0.479996	1.25153	-5.84735
Kid. Cortex	Mouse	Or4c11	Or4c11;Or4c11b	A2ATJ9;Q8VGF5	Olfactory receptor	1.82768	10.9781	0.0364216	0.167672	2.58092	-3.91523
Kid. Cortex	Mouse	Fam171a1	Fam171a1	A2ATK9	Family with sequence similarity 171, member A1	0.125393	10.7815	0.14053	0.357743	1.61609	-5.38542
Kid. Cortex	Mouse	Lamc3	Lamc3	A2ATM9;Q9R0B6	Laminin gamma 3 (Fragment);Laminin subunit gamma-3	-0.225512	11.5302	0.174016	0.39994	-1.47613	-5.57128
Kid. Cortex	Mouse	Dhtkd1	Dhtkd1	A2ATU0	2-oxoadipate dehydrogenase complex component E1	-0.38119	13.6945	0.0421865	0.180629	-2.36595	-4.269
Kid. Cortex	Mouse	Usp4	Usp4	A0A0A6YW28;P35123	Ubiquitin carboxyl-terminal hydrolase;Ubiquitin carboxyl-terminal hydrolase 4	0.0730105	12.5658	0.350936	0.585159	0.983764	-6.13331
Kid. Cortex	Mouse	Hat1	Hat1	A2ATU9;Q8BY71	Histone acetyltransferase type B catalytic subunit	0.238427	10.9423	0.0183448	0.115257	2.87437	-3.4555
Kid. Cortex	Mouse	Raly	Raly	A2AU62;Q64012	HnRNP-associated with lethal yellow (Fragment);RNA-binding protein Raly	0.0697683	13.533	0.574199	0.770802	0.583014	-6.45273
Kid. Cortex	Mouse	Bbs5	Bbs5	A2AUC6;Q9CZQ9	Bardet-Biedl syndrome 5 protein homolog	0.472769	8.41489	0.189397	0.418755	1.43429	-5.575
Kid. Cortex	Mouse	Epb41l1	Epb41l1	A2AUK8	Erythrocyte membrane protein band 4.1 like 1	-0.102662	13.9375	0.193254	0.423559	-1.40614	-5.66045
Kid. Cortex	Mouse	Eif2ak4	Eif2ak4	A2AUM0;A2AUM1;A2AUM2;Q9QZ05	non-specific serine/threonine protein kinase;non-specific serine/threonine protein kinase;non-specific serine/threonine protein kinase;eIF-2-alpha kinase GCN2	-0.259518	11.35	0.0929653	0.282803	-1.87892	-5.01332
Kid. Cortex	Mouse	Pfkfb3	Pfkfb3	A2AUP1;A2AUP3;A2AUP4;A2AUP5;A7UAK4;A7UAK5;A7UAK8;Q3U3S6;Q7TS91	6-phosphofructo-2-kinase/fructose-2,6-biphosphatase 3;6-phosphofructo-2-kinase/fructose-2,6-biphosphatase 3;6-phosphofructo-2-kinase/fructose-2,6-biphosphatase 3;6-phosphofructo-2-kinase/fructose-2, 6-biphosphatase 3 splice variant 3;6-phosphofructo-2-kinase/fructose-2, 6-biphosphatase 3 splice variant 1;6-phosphofructo-2-kinase/fructose-2, 6-biphosphatase 3 splice variant 2;6-phosphofructo-2-kin…	0.418774	11.5491	0.0612872	0.223035	2.13731	-4.62515
Kid. Cortex	Mouse	Dab2ip	Dab2ip	A2AUX3;A2AUX5;B7ZD29;F6RK07;Q3UHC7	Disabled 2 interacting protein;Disabled 2 interacting protein;Disabled 2 interacting protein;Disabled 2 interacting protein (Fragment);Disabled homolog 2-interacting protein	0.0469045	11.2446	0.545168	0.752716	0.6287	-6.4237
Kid. Cortex	Mouse	Baz2b	Baz2b	A2AUY4	Bromodomain adjacent to zinc finger domain protein 2B	0.288015	9.60478	0.00528852	0.0593072	3.65347	-2.21121
Kid. Cortex	Mouse	Bmf	Bmf	A2AV74;A2AV75;Q91ZE9	BCL2 modifying factor;BCL2 modifying factor;Bcl-2-modifying factor	0.190828	9.2251	0.605972	0.790326	0.536854	-6.42693
Kid. Cortex	Mouse	Svep1	Svep1	A2AVA0	Sushi, von Willebrand factor type A, EGF and pentraxin domain-containing protein 1	0.474445	9.69988	0.0573617	0.21465	2.17798	-4.56253
Kid. Cortex	Mouse	Trpv5	Trpv5	A0A0A6YW69;P69744	Transient receptor potential cation channel, subfamily V, member 5;Transient receptor potential cation channel subfamily V member 5	-0.0918171	8.95507	0.757376	0.87768	-0.319712	-6.5271
Kid. Cortex	Mouse	Prr5l	Prr5l	A2AVJ5;B0R106	Proline-rich protein 5-like;Proline rich 5 like (Fragment)	0.550008	6.95884	0.0534487	0.206913	2.51573	-3.9952
Kid. Cortex	Mouse	Rrbp1	Rrbp1	A2AVJ7;Q99PL5	Ribosome binding protein 1;Ribosome-binding protein 1	0.150703	14.5835	0.0658222	0.232095	2.09336	-4.69241
Kid. Cortex	Mouse	Rc3h2	Rc3h2	A2AVP4;P0C090	RING-type E3 ubiquitin transferase;Roquin-2	-0.0156957	9.89487	0.944148	0.973566	-0.0722874	-6.58027
Kid. Cortex	Mouse	Slc43a3	Slc43a3	A2AVZ9	Equilibrative nucleobase transporter 1	-0.128606	10.2073	0.657818	0.822714	-0.457987	-6.52167
Kid. Cortex	Mouse	Ssrp1	Ssrp1	A2AW05;Q08943	FACT complex subunit SSRP1 (Fragment);FACT complex subunit SSRP1	0.246558	12.9047	0.0408723	0.177635	2.38526	-4.23853
Kid. Cortex	Mouse	Ly75	Ly75	A2AW86;Q60767	Lymphocyte antigen 75	0.072618	8.19752	0.76498	0.882477	0.308151	-6.58331
Kid. Cortex	Mouse	Rabgap1	Rabgap1	A2AWA9	Rab GTPase-activating protein 1	0.0578936	12.7988	0.42086	0.650934	0.843387	-6.26125
Kid. Cortex	Mouse	Ptprj	Ptprj	A2AWF8;A2AWF9;E9Q4S7;Q64455	protein-tyrosine-phosphatase;protein-tyrosine-phosphatase;protein-tyrosine-phosphatase;Receptor-type tyrosine-protein phosphatase eta	-0.066856	11.9264	0.677383	0.832727	-0.429893	-6.535
Kid. Cortex	Mouse	Mga	Mga	A2AWL7;E9QLG3;H7BX50	MAX gene-associated protein;MAX gene associated;MAX gene associated	-0.25954	8.58896	0.37719	0.609056	-0.93491	-6.09472
Kid. Cortex	Mouse	Ythdf1	Ythdf1	A2AWN8;P59326	YTH domain-containing family protein;YTH domain-containing family protein 1	0.0297997	10.3823	0.906065	0.955524	0.121369	-6.62686
Kid. Cortex	Mouse	Lcn2	Lcn2	A0A0A6YW77;P11672	Lipocalin 2 (Fragment);Neutrophil gelatinase-associated lipocalin	2.11883	11.1404	0.00538178	0.0597133	3.97143	-1.98098
Kid. Cortex	Mouse	Arhgef10l	Arhgef10l	A2AWP6;A2AWP8	Rho guanine nucleotide exchange factor (GEF) 10-like;Rho guanine nucleotide exchange factor 10-like protein	0.172428	11.3725	0.0697144	0.241091	2.05791	-4.74633
Kid. Cortex	Mouse	Gpr155	Gpr155	A2AWR2;A2AWR3	G protein-coupled receptor 155	-0.381881	9.74883	0.00382906	0.0486346	-3.86301	-1.88509
Kid. Cortex	Mouse	Ubtf	Ubtf	A2AWT5	Upstream binding transcription factor, RNA polymerase I	0.174801	12.1337	0.132007	0.343478	1.65647	-5.33007
Kid. Cortex	Mouse	Btk	Btk	A2BDW0;P35991	Tyrosine-protein kinase;Tyrosine-protein kinase BTK	0.705848	9.31681	0.251619	0.490025	1.29584	-5.31582
Kid. Cortex	Mouse	Dpm1	Dpm1	A2BDX2;O70152	Dolichol-phosphate mannosyltransferase subunit 1	0.059369	13.3621	0.532078	0.742603	0.64976	-6.40965
Kid. Cortex	Mouse	Mocs3	Mocs3	A2BDX3	Adenylyltransferase and sulfurtransferase MOCS3	-0.188423	12.2024	0.0501014	0.199048	-2.2609	-4.4338
Kid. Cortex	Mouse	Alg6	Alg6	A2BDY0;Q3TAE8	Alpha-1,3-glucosyltransferase (Fragment);Dolichyl pyrophosphate Man9GlcNAc2 alpha-1,3-glucosyltransferase	0.460893	6.87406	0.900351	0.952813	0.131708	-6.32389
Kid. Cortex	Mouse	Las1l	Las1l	A2BE28	Ribosomal biogenesis protein LAS1L	0.208947	11.2379	0.0209351	0.124216	2.79343	-3.58592
Kid. Cortex	Mouse	Set	Set	A2BE93;Q9EQU5	SET nuclear oncogene (Fragment);Protein SET	0.187754	14.5696	0.0136308	0.0982714	3.05728	-3.16074
Kid. Cortex	Mouse	Dlg3	Dlg3	A2BEE9;A2BEF2;P70175;Q52KF7	Discs large MAGUK scaffold protein 3;Discs large MAGUK scaffold protein 3;Disks large homolog 3;Discs large MAGUK scaffold protein 3	-0.199894	11.3789	0.150043	0.369715	-1.57354	-5.44292
Kid. Cortex	Mouse	Cnih4	Cnih4	A0A0A6YW87;Q9CX13	Cornichon family AMPA receptor auxiliary protein 4;Protein cornichon homolog 4	0.261229	12.4976	0.0210574	0.124425	2.78987	-3.59166
Kid. Cortex	Mouse	Mlx	Mlx	A2BFB0;A2BFB1;A2BFB2;O08609	MAX-like protein X;MAX-like protein X;MAX-like protein X;Max-like protein X	0.277815	10.7547	0.426685	0.656984	0.832461	-6.27051
Kid. Cortex	Mouse	Dync1i2	Dync1i2	A2BFF9	Dynein cytoplasmic 1 intermediate chain 2	-0.0654746	9.04507	0.616788	0.796842	-0.518241	-6.49039
Kid. Cortex	Mouse	Nfib	Nfib	A2BG75;A2BG76;A2BG77;I7HIP8;P97863	Nuclear factor 1;Nuclear factor 1;Nuclear factor 1;Nuclear factor 1;Nuclear factor 1 B-type	0.210104	11.3504	0.0949284	0.286771	1.86581	-5.03248
Kid. Cortex	Mouse	Ppih	Ppih	A2BGI8	Peptidyl-prolyl cis-trans isomerase (Fragment)	0.139005	12.8235	0.168307	0.392513	1.4982	-5.54262
Kid. Cortex	Mouse	Arid1a	Arid1a	A2BH40;E9QAQ7	AT-rich interactive domain-containing protein 1A;AT rich interactive domain 1A (SWI-like)	0.144694	11.6648	0.0555541	0.211456	2.19762	-4.53215
Kid. Cortex	Mouse	Zfp185	Zfp185	A2BI37;G5E8W8	Zinc finger protein 185	-0.0686699	11.9464	0.669604	0.828293	-0.441017	-6.52982
Kid. Cortex	Mouse	Xlr4a	Xlr4a;Xlr4a;Xlr4b;Xlr4c;Xlr4b	A2BI40;A2BI41;B1B0R5;Q3TKR2;Q9JJQ7	X-linked lymphocyte-regulated 4A;X-linked lymphocyte-regulated 4A (Fragment);X-linked lymphocyte-regulated 4B (Fragment);X-linked lymphocyte-regulated 4C;X-linked lymphocyte regulated gene 4	-0.763377	10.7028	0.0802323	0.2601	-2.6019	-3.92177
Kid. Cortex	Mouse	Mup10	Mup10;Mup2;Mup22	A2BIN1;P11589;Q4FZE8	Major urinary protein 10;Major urinary protein 2;Major urinary protein 1	1.76797	15.0124	0.00187759	0.0327753	4.33988	-1.16348
Kid. Cortex	Mouse	Rps6ka6	Rps6ka6	A2CEE5;A2CEE6;A2CEE7;B1B0X3;E9PUP0;Q7TPS0	Ribosomal protein S6 kinase;Ribosomal protein S6 kinase;Ribosomal protein S6 kinase;Ribosomal protein S6 kinase;Ribosomal protein S6 kinase;Ribosomal protein S6 kinase alpha-6	0.186279	8.34593	0.688657	0.839548	0.415556	-6.48887
Kid. Cortex	Mouse	Efcab7	Efcab7	A2CEK1;Q8VDY4	EF-hand calcium-binding domain-containing protein 7 (Fragment);EF-hand calcium-binding domain-containing protein 7	1.03555	8.61167	0.0379937	0.171115	4.98181	-2.97133
Kid. Cortex	Mouse	Rapgef2	Rapgef2	A0A0A6YWG7	Rap guanine nucleotide exchange factor (GEF) 2	0.13534	10.4699	0.0497369	0.198178	2.26537	-4.42683
Kid. Cortex	Mouse	Mup13	Mup13	A2CEK6	Major urinary protein 11	1.5068	9.86927	0.103554	0.301526	1.83678	-5.03521
Kid. Cortex	Mouse	Trnau1ap	Trnau1ap	A2CEQ6;Q80VC6	tRNA selenocysteine-associated protein 1;tRNA selenocysteine 1-associated protein 1	-0.012298	11.1749	0.95131	0.976922	-0.0627847	-6.63274
Kid. Cortex	Mouse	Clec10a	Clec10a	A2CF65;F8WHB7;J3QPR7;P49300	C-type lectin domain family 10, member A (Fragment);C-type lectin domain family 10, member A;C-type lectin domain family 10, member A;C-type lectin domain family 10 member A	1.41216	11.8941	7.18643e-06	0.00342469	9.19088	4.33084
Kid. Cortex	Mouse	0610010K14Rik	0610010K14Rik	A2CF80;A2CF83	RIKEN cDNA 0610010K14 gene	-0.24741	9.07994	0.470333	0.694027	-0.770335	-6.12093
Kid. Cortex	Mouse	Chrd	Chrd	A2CG33;A6H5Z6;Q9Z0E2	Chordin	0.37334	7.51312	0.214299	0.448404	1.79605	-4.63939
Kid. Cortex	Mouse	Rab12	Rab12	A2CG35;P35283	RAB12, member RAS oncogene family;Ras-related protein Rab-12	0.211103	11.9733	0.048325	0.195211	2.28298	-4.39931
Kid. Cortex	Mouse	Kalrn	Kalrn	A2CG49;F6QYT9	Kalirin;Kalirin, RhoGEF kinase (Fragment)	-0.123136	11.5015	0.0961708	0.288785	-1.85765	-5.04439
Kid. Cortex	Mouse	Arid4b	Arid4b	A2CG63;Z4YL44;Z4YMH1	AT-rich interactive domain-containing protein 4B;AT rich interactive domain 4B (RBP1-like);AT rich interactive domain 4B (RBP1-like) (Fragment)	0.117652	8.69675	0.520031	0.733849	0.669416	-6.39615
Kid. Cortex	Mouse	Ehmt2	Ehmt2	A2CG76;Q9Z148	Euchromatic histone lysine N-methyltransferase 2;Histone-lysine N-methyltransferase EHMT2	0.228608	10.2514	0.0242196	0.133586	2.70435	-3.72929
Kid. Cortex	Mouse	Dytn	Dytn	A2CI98	Dystrotelin	0.108848	11.2221	0.681924	0.835508	0.427405	-6.40687
Kid. Cortex	Mouse	Rab3gap2	Rab3gap2	A0A0A6YWM5;E9QKE4	RAB3 GTPase activating protein subunit 2	-0.0215277	12.5205	0.729633	0.863619	-0.356566	-6.56595
Kid. Cortex	Mouse	Bltp3b	Bltp3b	A2RSJ4	Bridge-like lipid transfer protein family member 3B	-0.108494	11.6883	0.260398	0.498495	-1.20101	-5.90517
Kid. Cortex	Mouse	Dennd5b	Dennd5b	A2RSQ0	DENN domain-containing protein 5B	-0.0276307	11.821	0.666577	0.827125	-0.445362	-6.52776
Kid. Cortex	Mouse	Tyw5	Tyw5	A2RSX7	tRNA wybutosine-synthesizing protein 5	-0.248522	10.9407	0.0369597	0.16908	-2.44662	-4.14137
Kid. Cortex	Mouse	Kansl3	Kansl3	A2RSY1	KAT8 regulatory NSL complex subunit 3	0.0212253	10.2913	0.813248	0.909727	0.243272	-6.60268
Kid. Cortex	Mouse	Dennd3	Dennd3	A2RT67;G3UYA1	DENN domain-containing protein 3;DENN/MADD domain containing 3	0.0689398	11.2491	0.374581	0.607104	0.934207	-6.18033
Kid. Cortex	Mouse	Rsrc2	Rsrc2	A2RTL5;S4R1M5;S4R265;S4R2L4	Arginine/serine-rich coiled-coil protein 2;Arginine/serine-rich coiled-coil 2;Arginine/serine-rich coiled-coil 2;Arginine/serine-rich coiled-coil 2	0.01884	11.3317	0.896986	0.950184	0.133174	-6.62522
Kid. Cortex	Mouse	Palm3	Palm3	A2TJV2	Paralemmin-3	-0.396345	11.7933	0.000533573	0.0184313	-5.24156	0.110354
Kid. Cortex	Mouse	Chd6	Chd6	A3KFM7	Chromodomain-helicase-DNA-binding protein 6	0.17833	9.54344	0.16049	0.382462	1.52951	-5.50153
Kid. Cortex	Mouse	Pabpc4	Pabpc4	A3KFU5;Q6PHQ9	Polyadenylate-binding protein	-0.018313	13.7181	0.813729	0.909727	-0.242633	-6.60285
Kid. Cortex	Mouse	Col16a1	Col16a1	A3KFV7;Q8BLX7	Collagen, type XVI, alpha 1 (Fragment);Collagen alpha-1(XVI) chain	-0.46019	9.16916	0.375163	0.60718	-0.997051	-5.71374
Kid. Cortex	Mouse	Tusc2	Tusc2	A0A0A6YWP5;Q9WVF8	Tumor suppressor 2, mitochondrial calcium regulator;Tumor suppressor candidate 2	-0.218518	11.2546	0.108503	0.3099	-1.78159	-5.15422
Kid. Cortex	Mouse	Nt5c1a	Nt5c1a	A3KFX0	Cytosolic 5'-nucleotidase 1A	0.0787964	11.8383	0.605114	0.78997	0.535753	-6.48062
Kid. Cortex	Mouse	Kdm1a	Kdm1a	A3KG93;Q6ZQ88	Lysine-specific histone demethylase;Lysine-specific histone demethylase 1A	0.112614	11.2919	0.159629	0.381596	1.53305	-5.49687
Kid. Cortex	Mouse	Tbc1d8b	Tbc1d8b	A3KGB4	TBC1 domain family member 8B	-0.014244	11.8147	0.817557	0.911468	-0.237539	-6.60418
Kid. Cortex	Mouse	Plcb2	Plcb2	A3KGF7;E9PYI3	1-phosphatidylinositol 4,5-bisphosphate phosphodiesterase beta-2;1-phosphatidylinositol 4,5-bisphosphate phosphodiesterase	0.78921	8.74026	0.000601524	0.0195498	6.55847	0.328628
Kid. Cortex	Mouse	Cep250	Cep250	A3KGJ7;E9Q5A8;Q60952	Centrosomal protein 250;Centrosomal protein 250;Centrosome-associated protein CEP250	0.259734	9.92538	0.0293528	0.148651	2.58708	-3.91744
Kid. Cortex	Mouse	Hmgn2	Hmgn2	A3KGL9;B7ZCQ3;F6W687;P09602	High mobility group nucleosomal binding domain 2;High mobility group nucleosomal binding domain 2;High mobility group nucleosomal binding domain 2 (Fragment);Non-histone chromosomal protein HMG-17	1.60811	9.83721	0.123127	0.332161	1.70114	-5.26803
Kid. Cortex	Mouse	Sptan1	Sptan1	A3KGU5	Spectrin alpha, non-erythrocytic 1	0.194955	10.0464	0.380164	0.611225	0.928797	-6.13142
Kid. Cortex	Mouse	Sptan1	Sptan1	A3KGU9	Spectrin alpha, non-erythrocytic 1	-0.261076	16.1687	0.00897541	0.0769423	-3.3175	-2.74324
Kid. Cortex	Mouse	Odf2	Odf2	A3KGV1	Outer dense fiber protein 2	-0.0379443	8.88658	0.934897	0.968868	-0.083998	-6.63104
Kid. Cortex	Mouse	Aff1	Aff1	A3KMF4;E9Q921;O88573	AF4/FMR2 family, member 1;AF4/FMR2 family, member 1;AF4/FMR2 family member 1	0.164342	9.55541	0.659908	0.823739	0.459348	-6.30301
Kid. Cortex	Mouse	Rcor3	Rcor3	A0A0A6YWP7;A0A0A6YXM5	REST corepressor 3	0.223508	10.6171	0.0287707	0.14741	2.59929	-3.89789
Kid. Cortex	Mouse	Ttc38	Ttc38	A3KMP2	Tetratricopeptide repeat protein 38	-0.103106	14.1721	0.10571	0.305401	-1.79808	-5.13058
Kid. Cortex	Mouse	Iqsec2	Iqsec2	A4GZ26;D3Z5I6;E9QAD8;Q5DU25	ARF6 guanine nucleotide exchange factor IQArfGEF;IQ motif and Sec7 domain 2;IQ motif and Sec7 domain 2;IQ motif and SEC7 domain-containing protein 2	-0.0401523	12.0918	0.556353	0.759072	-0.610937	-6.43523
Kid. Cortex	Mouse	Cma1	Cma1	A4QPC5;P21844	Chymase 1, mast cell;Chymase	1.50144	7.32413	0.0814905	0.262368	2.31596	-4.13929
Kid. Cortex	Mouse	Rel	Rel	A4QPD3;P15307	Reticuloendotheliosis oncogene;Proto-oncogene c-Rel	0.61986	10.9492	0.0342989	0.163207	2.49216	-4.06898
Kid. Cortex	Mouse	Ppp1r11	Ppp1r11	A5A4Y9;G3UZ30	E3 ubiquitin-protein ligase PPP1R11;E3 ubiquitin-protein ligase PPP1R11 (Fragment)	-0.0275868	11.2318	0.807925	0.906833	-0.250367	-6.60078
Kid. Cortex	Mouse	Pard3	Pard3	A5D6P2;B7ZNY3;F6S7Z1;G3XA13;Q99NH2	Par-3 (Partitioning defective 3) homolog (C. elegans);Par-3 family cell polarity regulator;Par-3 family cell polarity regulator (Fragment);Par-3 family cell polarity regulator;Partitioning defective 3 homolog	-0.0775429	11.6573	0.253259	0.491235	-1.22057	-5.88298
Kid. Cortex	Mouse	Phf11	Phf11	A6H5X4	PHD finger protein 11	0.311418	9.97355	0.419755	0.650201	0.857111	-6.1176
Kid. Cortex	Mouse	Mtr	Mtr	A6H5Y3	Methionine synthase	0.019473	12.6658	0.761421	0.879969	0.312987	-6.58169
Kid. Cortex	Mouse	Exoc6b	Exoc6b	A6H5Z3	Exocyst complex component 6B	0.120837	11.7426	0.396312	0.628285	0.890628	-6.22002
Kid. Cortex	Mouse	Mipep	Mipep	A6H611	Mitochondrial intermediate peptidase	-0.202599	12.8396	0.00823821	0.0733132	-3.37139	-2.65726
Kid. Cortex	Mouse	Ighv14-1	Ighv14-1;Ighv14-3	A0A075B5R4;A0A075B5R9	Immunoglobulin heavy variable 14-1 (Fragment);Immunoglobulin heavy variable V14-3 (Fragment)	-0.118403	10.1578	0.626381	0.803612	-0.56961	-5.70907
Kid. Cortex	Mouse	Sox17	Sox17	A0A0A6YWS4;A0A0A6YXV3;Q61473	SRY (sex determining region Y)-box 17 (Fragment);SRY (sex determining region Y)-box 17 (Fragment);Transcription factor SOX-17	0.716313	7.29548	0.280759	0.518793	1.18516	-5.72654
Kid. Cortex	Mouse	Phrf1	Phrf1	A6H619	PHD and RING finger domain-containing protein 1	0.228076	10.1131	0.0318292	0.156052	2.53771	-3.99636
Kid. Cortex	Mouse	Armt1	Armt1	A6H630	Damage-control phosphatase ARMT1	-0.0708933	11.6063	0.195615	0.426346	-1.39797	-5.67068
Kid. Cortex	Mouse	Kctd17	Kctd17	A6H697;E0CYD2;E0CYQ0;E0CZ97;F7B6A4	Kctd17 protein;Potassium channel tetramerisation domain containing 17;Potassium channel tetramerisation domain containing 17;Potassium channel tetramerisation domain containing 17;Potassium channel tetramerisation domain containing 17 (Fragment)	0.302149	9.44934	0.0426627	0.181932	2.3591	-4.2798
Kid. Cortex	Mouse	Rabgap1l	Rabgap1l	A6H6A9	Rab GTPase-activating protein 1-like	-0.0472537	12.1144	0.506302	0.72239	-0.692155	-6.38008
Kid. Cortex	Mouse	Mmrn2	Mmrn2	A6H6E2	Multimerin-2	0.143617	12.2989	0.0724817	0.245408	2.03384	-4.78276
Kid. Cortex	Mouse	Cyp2b13	Cyp2b13;Cyp2b9	A6H6J2;P12790	Cytochrome P450;Cytochrome P450 2B9	-0.0812218	11.6601	0.752397	0.875408	-0.325289	-6.57745
Kid. Cortex	Mouse	Dennd4c	Dennd4c	A6H8H2	DENN domain-containing protein 4C	0.0191272	12.1016	0.810176	0.908231	0.247366	-6.60159
Kid. Cortex	Mouse	Mapk8	Mapk8	A6P3E4;G3X8U9	Stress-activated protein kinase JNK	-0.050429	12.5352	0.594905	0.783109	-0.551212	-6.47174
Kid. Cortex	Mouse	Med24	Med24	A6PW47;Q99K74	Mediator of RNA polymerase II transcription subunit 24	0.0849871	10.8187	0.214267	0.448404	1.33624	-5.74673
Kid. Cortex	Mouse	P3h1	P3h1	A6PW84;Q3V1T4	procollagen-proline 3-dioxygenase;Prolyl 3-hydroxylase 1	0.521618	11.1868	0.000132003	0.0113344	6.3554	1.51216
Kid. Cortex	Mouse	Utp25	Utp25	A0A0A6YWS6;A0A0R4J114;Q8BTT6	U3 small nucleolar RNA-associated protein 25 homolog	0.179197	8.86763	0.261304	0.498797	1.19856	-5.90793
Kid. Cortex	Mouse	Parvg	Parvg	A6PW97;E9PYG5;Q9ERD8	Parvin, gamma (Fragment);Parvin, gamma;Gamma-parvin		8.86479
Kid. Cortex	Mouse	Usp43	Usp43	A6PWR8;Q8BUM9	ubiquitinyl hydrolase 1;Ubiquitin carboxyl-terminal hydrolase 43	0.186722	9.21177	0.0340495	0.162506	2.49661	-4.06189
Kid. Cortex	Mouse	Gsn	Gsn	A6PWS5	Gelsolin (Fragment)	0.179433	11.9037	0.253773	0.491709	1.21915	-5.88461
Kid. Cortex	Mouse	Bpifb6	Bpifb6	A6PWW6;Q8BU51	BPI fold containing family B, member 6 (Fragment);BPI fold-containing family B member 6	-0.529196	8.29937	0.0861705	0.270964	-1.99563	-4.75539
Kid. Cortex	Mouse	Uqcc1	Uqcc1	A6PWX7;Q9CWU6	Ubiquinol-cytochrome c reductase complex assembly factor 1;Ubiquinol-cytochrome-c reductase complex assembly factor 1	-0.138065	12.6604	0.104321	0.302951	-1.80643	-5.11857
Kid. Cortex	Mouse	Arhgap31	Arhgap31	A6X8Z5	Rho GTPase-activating protein 31	0.291335	11.5088	0.0298726	0.150394	2.57638	-3.93456
Kid. Cortex	Mouse	Dpy19l1	Dpy19l1	A6X919	Probable C-mannosyltransferase DPY19L1	0.696485	10.1155	0.0280018	0.145362	2.67822	-3.77789
Kid. Cortex	Mouse	Itih4	Itih4	A6X935	Inter alpha-trypsin inhibitor, heavy chain 4	1.20882	12.2083	0.00146776	0.0300198	4.50989	-0.913889
Kid. Cortex	Mouse	Aldoa	Aldoa	A6ZI44	Fructose-bisphosphate aldolase	0.39102	9.41502	0.0743476	0.249246	2.01811	-4.80649
Kid. Cortex	Mouse	Aldoart1	Aldoart1	A6ZI46;Q9CPQ9	Fructose-bisphosphate aldolase	-0.0580061	10.9284	0.338279	0.573894	-1.01132	-6.10633
Kid. Cortex	Mouse	Rabgap1l	Rabgap1l	A0A0A6YWT4	RAB GTPase activating protein 1-like (Fragment)	-0.025589	10.4468	0.807397	0.906536	-0.251072	-6.60059
Kid. Cortex	Mouse	Aldoart2	Aldoart2	A6ZI47	Fructose-bisphosphate aldolase	0.530221	11.4882	0.152584	0.372658	1.56259	-5.4576
Kid. Cortex	Mouse	Eml4	Eml4	A7ISP9;F8WJ93;Q3UMY5	EMAP-like protein 4;Echinoderm microtubule associated protein like 4;Echinoderm microtubule-associated protein-like 4	0.285738	12.6414	0.00942632	0.0791562	3.28676	-2.79236
Kid. Cortex	Mouse	Chn1	Chn1	A7VK13;B2FDI2;Q91V57	Alpha2-chimerin;Chimerin 1 (Fragment);N-chimaerin	0.391043	8.74953	0.0141154	0.100026	3.42154	-2.78271
Kid. Cortex	Mouse	Epb41l3	Epb41l3	A7YY80	130kDa Protein 4.1B MEF cell isoform	-0.166682	14.7783	0.187581	0.416454	-1.42613	-5.63526
Kid. Cortex	Mouse	Thada	Thada	A8C756	Thyroid adenoma-associated protein homolog	0.0700165	10.8499	0.453369	0.679411	0.783658	-6.31062
Kid. Cortex	Mouse	Lgals8	Lgals8	A8DIL0;Q9JL15	Galectin;Galectin-8	0.0455267	10.3616	0.748322	0.874294	0.33086	-6.57548
Kid. Cortex	Mouse	Hbb-bs	Hbb-bs	A8DUK4	Beta-globin	-0.304594	16.6248	0.265271	0.503244	-1.18791	-5.91989
Kid. Cortex	Mouse	Lsm10	Lsm10	A8Y5G9;Q8QZX5	U7 snRNP-specific Sm-like protein LSM10 (Fragment);U7 snRNA-associated Sm-like protein LSm10	0.368845	9.37992	0.0906417	0.278141	1.89477	-4.99007
Kid. Cortex	Mouse	Sec14l1	Sec14l1	A8Y5H7	SEC14-like protein 1	-0.253404	10.0403	0.00754328	0.0704504	-3.42701	-2.56876
Kid. Cortex	Mouse	Ints11	Ints11	A8Y5J3;Q9CWS4	Integrator complex subunit 11	0.220904	11.5879	0.170873	0.395673	1.4882	-5.55564
Kid. Cortex	Mouse	Usp19	Usp19	A0A0A6YWX1;A0A991ELD7;E9Q9M5;J3KMM1;Q3UJD6	ubiquitinyl hydrolase 1;Ubiquitin specific peptidase 19;ubiquitinyl hydrolase 1;ubiquitinyl hydrolase 1;Ubiquitin carboxyl-terminal hydrolase 19	-0.0118404	11.9823	0.844027	0.925497	-0.202504	-6.61255
Kid. Cortex	Mouse	Cfap61	Cfap61	A8Y5L4;Q8CEL2	Cilia and flagella associated protein 61;Cilia- and flagella-associated protein 61	-0.160491	9.12757	0.463521	0.688241	-0.769833	-6.26781
Kid. Cortex	Mouse	Med18	Med18	A8Y5Q6;Q9CZ82	Mediator of RNA polymerase II transcription subunit 18 (Fragment);Mediator of RNA polymerase II transcription subunit 18	-0.215777	11.5509	0.339168	0.574689	-1.01644	-6.04747
Kid. Cortex	Mouse	Pars2	Pars2	A8Y5T6;Q8CFI5	proline--tRNA ligase;Probable proline--tRNA ligase, mitochondrial	-0.274678	12.0506	0.0348776	0.163952	-2.48197	-4.08521
Kid. Cortex	Mouse	Naip2	Naip2	A9C471;Q9QUK4	NLR family, apoptosis inhibitory protein 2;Baculoviral IAP repeat-containing protein 1b	2.26418	7.25597	0.0618874	0.224222	2.16927	-4.55078
Kid. Cortex	Mouse	Tmem238	Tmem238	A9JSM3	Transmembrane protein 238	-0.125428	11.9942	0.387192	0.618747	-0.908703	-6.20375
Kid. Cortex	Mouse	Mgl2	Mgl2	A9XX86;Q8JZN1	Macrophage galactose N-acetyl-galactosamine specific lectin 2	1.85548	11.64	1.12471e-05	0.00342591	8.70063	3.90977
Kid. Cortex	Mouse	Nlgn4l	Nlgn4l	B0F2B4	Neuroligin 4-like	0.108525	9.46978	0.526998	0.738541	0.665573	-6.26771
Kid. Cortex	Mouse	Phf23	Phf23	B0QZH9;Q8BSN5	PHD finger protein 23 (Fragment);PHD finger protein 23	0.25012	9.72855	0.422725	0.652891	0.839878	-6.26423
Kid. Cortex	Mouse	Pik3cd	Pik3cd	B0QZL5;O35904;Q3T9Y0;Q3TBW3;Q3UDT3;Q8CI98	phosphatidylinositol-4,5-bisphosphate 3-kinase;Phosphatidylinositol 4,5-bisphosphate 3-kinase catalytic subunit delta isoform;phosphatidylinositol-4,5-bisphosphate 3-kinase;phosphatidylinositol-4,5-bisphosphate 3-kinase;phosphatidylinositol-4,5-bisphosphate 3-kinase;phosphatidylinositol-4,5-bisphosphate 3-kinase	1.43431	7.0983	0.000576211	0.019196	5.49621	0.145265
Kid. Cortex	Mouse	Ube2j2	Ube2j2	B0QZM1;B1ASK8;Q6P073	Ubiquitin-conjugating enzyme E2J 2;Ubiquitin-conjugating enzyme E2J 2;Ubiquitin-conjugating enzyme E2 J2	0.112902	10.4729	0.485372	0.706919	0.72757	-6.3541
Kid. Cortex	Mouse	Pcdh9	Pcdh9	A0A0A6YWY8;A0A0A6YY09;A0A0A6YY37;F8VPK8	Protocadherin 9	-0.866019	10.9198	0.159083	0.380863	-1.65374	-5.07531
Kid. Cortex	Mouse	Vamp2	Vamp2	B0QZN5;P63044	Vesicle-associated membrane protein 2	0.371033	11.8487	0.372552	0.605318	0.938368	-6.17645
Kid. Cortex	Mouse	Gm49340	Gm49340;Spata22	B0QZP0;Q5SV06	Predicted gene, 49340;Spermatogenesis-associated protein 22	0.122155	10.9865	0.267289	0.504962	1.18254	-5.92589
Kid. Cortex	Mouse	Syngr2	Syngr2;Syngr2;Syngr2;Gm20708;Syngr2	B0QZP8;H3BIZ8;H3BJY1;H3BKF4;O55101	Synaptogyrin 2;Synaptogyrin 2;Synaptogyrin 2;Predicted gene 20708;Synaptogyrin-2	0.183677	13.4101	0.287853	0.525975	1.12959	-5.98395
Kid. Cortex	Mouse	Rassf1	Rassf1	B0QZV7;Q99MK9	Ras association (RalGDS/AF-6) domain family member 1;Ras association domain-containing protein 1	0.11413	8.84987	0.617653	0.797137	0.522184	-6.35818
Kid. Cortex	Mouse	Supt3	Supt3	B0QZW4;B0QZW5;Q8BVY4	SPT3, SAGA and STAGA complex component (Fragment);SPT3, SAGA and STAGA complex component (Fragment);SPT3, SAGA and STAGA complex component	0.0535835	7.43769	0.700879	0.848049	0.403051	-6.35128
Kid. Cortex	Mouse	Chp1	Chp1	B0R091;P61022	Calcineurin-like EF hand protein 1;Calcineurin B homologous protein 1	-0.197314	13.4698	0.170806	0.395673	-1.48846	-5.55531
Kid. Cortex	Mouse	Rabepk	Rabepk	B0R0S4;Q8VCH5	Rab9 effector protein with kelch motifs	0.075947	11.2656	0.328212	0.565165	1.03379	-6.08388
Kid. Cortex	Mouse	Ptprs	Ptprs	B0V2N1	Receptor-type tyrosine-protein phosphatase S	0.0944111	9.32383	0.232625	0.468842	1.27978	-5.8143
Kid. Cortex	Mouse	Dmxl2	Dmxl2	B0V2P5	Dmx-like 2	0.00884446	12.7863	0.867313	0.937371	0.171908	-6.61878
Kid. Cortex	Mouse	Ap4b1	Ap4b1	B0V3P3;B0V3P4;Q9WV76	AP complex subunit beta;AP complex subunit beta;AP-4 complex subunit beta-1	0.0944352	10.4388	0.267619	0.505385	1.18166	-5.92686
Kid. Cortex	Mouse	Atp1b1	Atp1b1	A0A0A6YX05	Sodium/potassium-transporting ATPase subunit beta (Fragment)	0.897444	9.37081	0.170347	0.395032	1.55754	-5.23588
Kid. Cortex	Mouse	Mpped2	Mpped2	B1APT1;Q9CZJ0	Metallophosphoesterase domain containing 2 (Fragment);Metallophosphoesterase MPPED2	0.00390652	9.5538	0.989413	0.995471	0.0136422	-6.63479
Kid. Cortex	Mouse	5031439G07Rik	5031439G07Rik;	B1APX2;Q3UE31	RIKEN cDNA 5031439G07 gene;Uncharacterized protein KIAA0930 homolog	0.205952	11.4379	0.120389	0.327556	1.7155	-5.24789
Kid. Cortex	Mouse	Atp7b	Atp7b	B1AQ57;Q64446	P-type Cu(+) transporter;Copper-transporting ATPase 2	-0.227187	9.75202	0.214005	0.448404	-1.47589	-5.20867
Kid. Cortex	Mouse	Krt15	Krt15	B1AQ77;Q61414	Keratin 15;Keratin, type I cytoskeletal 15	-0.0874336	9.34054	0.887182	0.947293	-0.15428	-6.03732
Kid. Cortex	Mouse	Dusp3	Dusp3	B1AQF4;Q9D7X3	Dual specificity protein phosphatase;Dual specificity protein phosphatase 3	0.167607	11.5237	0.0417234	0.1793	2.37269	-4.25838
Kid. Cortex	Mouse	Lgals9	Lgals9	B1AQR8;G3X9T7;O08573	Galectin;Galectin;Galectin-9	0.509496	12.1969	0.000779048	0.0222342	4.96128	-0.272271
Kid. Cortex	Mouse	Mapt	Mapt	B1AQW2	Microtubule-associated protein	0.0473052	14.4347	0.740586	0.869277	0.34147	-6.57163
Kid. Cortex	Mouse	Septin8	Septin8	B1AQY9;B1AQZ0;Q8CHH9	Septin;Septin 8;Septin-8	0.338296	12.4959	0.00532818	0.0594647	3.64866	-2.21874
Kid. Cortex	Mouse	Kif3a	Kif3a	B1AQZ2;P28741;Q3TET1;Q3UI47	Kinesin-like protein;Kinesin-like protein KIF3A;Kinesin-like protein;Kinesin-like protein	-0.107692	11.6155	0.356697	0.591043	-0.971468	-6.14516
Kid. Cortex	Mouse	Cisd3	Cisd3	B1AR13;B2RWE3;Z4YKM2	CDGSH iron-sulfur domain-containing protein 3, mitochondrial;CDGSH iron sulfur domain 3;CDGSH iron sulfur domain 3	-0.221417	12.0746	0.163959	0.386806	-1.51545	-5.52004
Kid. Cortex	Mouse	Atp6v1h	Atp6v1h	A0A0A6YX18;Q8BVE3	V-type proton ATPase subunit H	-0.302283	15.5705	0.00184029	0.0326019	-4.35362	-1.14315
Kid. Cortex	Mouse	Chd3	Chd3	B1AR17	DNA helicase	0.102875	12.3135	0.280643	0.518793	1.1478	-5.9642
Kid. Cortex	Mouse	Cldn7	Cldn7	B1AR46;Q9Z261	Claudin (Fragment);Claudin-7	-0.0609515	10.4852	0.804644	0.904674	-0.254747	-6.59958
Kid. Cortex	Mouse	Pecam1	Pecam1	B1ARB3;Q08481	Platelet/endothelial cell adhesion molecule 1;Platelet endothelial cell adhesion molecule	0.285191	12.6758	0.00356636	0.0473371	3.90964	-1.81321
Kid. Cortex	Mouse	Car6	Car6;Ca6	B1ARR4;P18761	Carbonic anhydrase 6	0.0560215	10.9031	0.918784	0.961138	0.110782	-6.04454
Kid. Cortex	Mouse	Vps13d	Vps13d	B1ART1;B1ART2	Vacuolar protein sorting 13D	0.00843952	12.6098	0.90159	0.953413	0.127186	-6.62607
Kid. Cortex	Mouse	Ssbp3	Ssbp3	B1AS34;B1AS37;Q9D032	Single-stranded DNA binding protein 3 (Fragment);Single-stranded DNA binding protein 3;Single-stranded DNA-binding protein 3	0.550687	10.904	0.00877746	0.0759147	3.3315	-2.72087
Kid. Cortex	Mouse	Cyb5rl	Cyb5rl	B1AS42;B1AS43;B1AS44	NADH-cytochrome b5 reductase-like;Cytochrome b5 reductase-like;Cytochrome b5 reductase-like (Fragment)	-0.190938	7.94997	0.16638	0.390103	-1.61894	-5.11773
Kid. Cortex	Mouse	Casz1	Casz1	B1AS46;Q9CWL2	Castor zinc finger 1;Zinc finger protein castor homolog 1	0.000350782	9.05375	0.999074	0.999591	0.00120264	-6.50764
Kid. Cortex	Mouse	Zfp362	Zfp362	B1ASA5	Zinc finger protein 362	0.313194	8.99245	0.0524675	0.204589	2.23265	-4.4778
Kid. Cortex	Mouse	Jak1	Jak1	B1ASP2	Tyrosine-protein kinase	0.428879	11.2333	0.00106034	0.0250878	4.73896	-0.584399
Kid. Cortex	Mouse	Sft2d2	Sft2d2	A0A0A6YX21;A0A0A6YY20;Q8VD57	SFT2 domain containing 2;Vesicle transport protein;Vesicle transport protein SFT2B	0.073131	9.05878	0.889514	0.948455	0.146147	-6.32156
Kid. Cortex	Mouse	Tlk2	Tlk2	B1ASU9;O55047	Tousled-like kinase 2 (Arabidopsis);Serine/threonine-protein kinase tousled-like 2	-0.28457	8.94295	0.626909	0.803804	-0.512051	-6.23965
Kid. Cortex	Mouse	Gk	Gk	B1ASZ3	glycerol kinase	-0.28334	10.1188	0.0185026	0.11579	-2.86911	-3.46397
Kid. Cortex	Mouse	Amz2	Amz2	B1AT59;B1AT60;Q400C8	Archaelysin family metallopeptidase 2;Archaelysin family metallopeptidase 2;Archaemetzincin-2	0.121083	10.3658	0.272627	0.509627	1.16849	-5.94148
Kid. Cortex	Mouse	Prpsap1	Prpsap1	B1AT82	Phosphoribosyl pyrophosphate synthetase-associated protein 1	-0.211768	13.0972	0.0614517	0.223548	-2.13566	-4.62768
Kid. Cortex	Mouse	Tmc6	Tmc6	B1ATB3;B1ATB5;D6RCY1;Q7TN60	Transmembrane channel-like protein;Transmembrane channel-like gene family 6 (Fragment);Transmembrane channel-like gene family 6;Transmembrane channel-like protein 6	-0.453335	10.0176	0.371269	0.60416	-1.04888	-5.46684
Kid. Cortex	Mouse	Tnrc6c	Tnrc6c	B1ATC3;B7ZC94;Q3UHC0	Trinucleotide repeat containing 6C;Trinucleotide repeat containing 6C (Fragment);Trinucleotide repeat-containing gene 6C protein	-0.101923	10.0103	0.347075	0.582298	-0.992088	-6.12522
Kid. Cortex	Mouse	Mtmr3	Mtmr3	B1ATD4;B1ATD5;Q8K296;R4GML8	Phosphatidylinositol-3-phosphate phosphatase (Fragment);Phosphatidylinositol-3-phosphate phosphatase;Myotubularin-related protein 3;Phosphatidylinositol-3-phosphate phosphatase (Fragment)	-0.0398137	11.9361	0.541085	0.750121	-0.635237	-6.41939
Kid. Cortex	Mouse	Aldh3a2	Aldh3a2	B1ATI0;B1AV77;P47740	Aldehyde dehydrogenase;Aldehyde dehydrogenase;Aldehyde dehydrogenase family 3 member A2	-0.186572	14.6679	0.355242	0.5894	-0.974561	-6.14219
Kid. Cortex	Mouse	Gas7	Gas7	B1ATI9;F6QB26;Q3U432;Q60780	Growth arrest specific 7;Growth arrest specific 7;Growth arrest specific 7;Growth arrest-specific protein 7	0.612886	9.13174	0.020469	0.122834	2.80721	-3.56372
Kid. Cortex	Mouse	Atp2a3	Atp2a3	B1ATS4;B1ATS5;E9Q559;Q64518	Calcium-transporting ATPase;Calcium-transporting ATPase;Calcium-transporting ATPase;Sarcoplasmic/endoplasmic reticulum calcium ATPase 3	0.297949	11.3946	0.0176911	0.112969	2.89664	-3.4196
Kid. Cortex	Mouse	Igsf3	Igsf3	A0A0A6YX40;Q6ZQA6	Immunoglobulin superfamily, member 3;Immunoglobulin superfamily member 3	0.36072	9.57414	0.00623533	0.0642054	3.54796	-2.37719
Kid. Cortex	Mouse	Dus1l	Dus1l	B1ATU5;Q8C2P3	Dihydrouridine synthase 1-like (S. cerevisiae);tRNA-dihydrouridine(16/17) synthase [NAD(P)(+)]-like	0.09558	8.9367	0.451054	0.677648	0.787813	-6.30729
Kid. Cortex	Mouse	Aifm1	Aifm1	B1AU25;Q9Z0X1	Apoptosis-inducing factor, mitochondrion-associated 1;Apoptosis-inducing factor 1, mitochondrial	-0.301867	15.3566	0.00646286	0.0651826	-3.52511	-2.41328
Kid. Cortex	Mouse	Mospd2	Mospd2	B1AU74;Q9CWP6	Motile sperm domain containing 2;Motile sperm domain-containing protein 2	0.285474	11.9628	0.0164286	0.108743	2.94214	-3.34625
Kid. Cortex	Mouse	Nasp	Nasp	B1AU75;Q99MD9	Nuclear autoantigenic sperm protein	0.169887	12.3101	0.057541	0.214954	2.17606	-4.56548
Kid. Cortex	Mouse	Nfia	Nfia	B1AUB9;B1AUC0;Q02780	Nuclear factor 1;Nuclear factor 1;Nuclear factor 1 A-type	0.0463741	12.4417	0.568503	0.767066	0.591873	-6.44726
Kid. Cortex	Mouse	P2rx1	P2rx1	B1AUD1;P51576	P2X purinoceptor;P2X purinoceptor 1	0.829314	9.55594	0.154931	0.376557	1.59414	-5.30032
Kid. Cortex	Mouse	Pex10	Pex10	B1AUE5	Peroxisome biogenesis factor 10	-0.130832	12.486	0.54674	0.753262	-0.626191	-6.42535
Kid. Cortex	Mouse	Ptpru	Ptpru	B1AUH1	Receptor-type tyrosine-protein phosphatase U	0.139018	9.45781	0.52377	0.736337	0.663287	-6.4004
Kid. Cortex	Mouse	Eif2b3	Eif2b3	B1AUN2;B1AUN3;Q3UKV0	Eukaryotic translation initiation factor 2B, subunit 3;Eukaryotic translation initiation factor 2B, subunit 3;Eukaryotic translation initiation factor 2B, subunit 3	0.0817452	12.6106	0.242538	0.48019	1.25082	-5.84818
Kid. Cortex	Mouse	Irak1	Irak1	B1AUW6;B1AUW8;B1AUW9;Q62406;Q8BR10	Interleukin-1 receptor-associated kinase 1	-0.0290885	10.7474	0.785196	0.894944	-0.280821	-6.59202
Kid. Cortex	Mouse	Kctd3	Kctd3	A0A0A6YX67;Q8BFX3	Potassium channel tetramerisation domain containing 3;BTB/POZ domain-containing protein KCTD3	1.14606	6.96585	0.0338202	0.161899	2.63184	-3.84149
Kid. Cortex	Mouse	Arhgap4	Arhgap4	B1AUX5;B1AUY3;E9PYS6;Q80Z68	Rho GTPase activating protein 4	0.87805	9.0736	0.0157981	0.106486	3.05091	-3.20749
Kid. Cortex	Mouse	Naa10	Naa10	B1AUY7;Q9QY36	N-terminal amino-acid N(alpha)-acetyltransferase NatA;N-alpha-acetyltransferase 10	0.0405977	12.3544	0.586589	0.77866	0.563911	-6.46427
Kid. Cortex	Mouse	Mid1	Mid1	B1AV01;O70583	RING-type E3 ubiquitin transferase;E3 ubiquitin-protein ligase Midline-1	-0.0281889	10.1321	0.914588	0.959065	-0.110305	-6.62825
Kid. Cortex	Mouse	Nhs	Nhs	B1AV60	NHS actin remodeling regulator	-0.0714525	11.6235	0.546597	0.753262	-0.626419	-6.4252
Kid. Cortex	Mouse	Yipf6	Yipf6	B1AV66;Q8BR70	Protein YIPF (Fragment);Protein YIPF6	-0.834548	10.4908	0.107262	0.307883	-1.78886	-5.1438
Kid. Cortex	Mouse	Cfap418	Cfap418	B1AV75;Q3UJP5	Cilia- and flagella-associated protein 418	-0.2912	10.5649	0.330977	0.567752	-1.02756	-6.09014
Kid. Cortex	Mouse	Xpnpep2	Xpnpep2	B1AVD1	Xaa-Pro aminopeptidase 2	-0.482003	12.3175	0.0343964	0.163236	-2.49043	-4.07173
Kid. Cortex	Mouse	Tsc22d3	Tsc22d3	B1AVF2;Q9Z2S7	TSC22 domain family, member 3;TSC22 domain family protein 3	-0.274916	11.2489	0.123492	0.332673	-1.69925	-5.27067
Kid. Cortex	Mouse	Mid2	Mid2	B1AVF4;B1AVF5;Q9QUS6	RING-type E3 ubiquitin transferase;RING-type E3 ubiquitin transferase;Probable E3 ubiquitin-protein ligase MID2	-0.0763363	10.0602	0.670452	0.828696	-0.439802	-6.53039
Kid. Cortex	Mouse	Tbc1d2	Tbc1d2	B1AVH7	TBC1 domain family member 2A	-0.0379946	9.80126	0.872475	0.940214	-0.165151	-6.62002
Kid. Cortex	Mouse	Ighv7-1	Ighv7-1	A0A075B5S2	Immunoglobulin heavy variable 7-1 (Fragment)		10.4442
Kid. Cortex	Mouse	Prkar2a	Prkar2a	A0A0A6YX73;Q8K1M3	Protein kinase, cAMP dependent regulatory, type II alpha;Protein kinase, cAMP dependent regulatory, type II alpha	-0.0316366	14.6448	0.702385	0.848882	-0.394516	-6.55063
Kid. Cortex	Mouse	Col4a6	Col4a6	B1AVK5	Collagen, type IV, alpha 6	0.818719	11.0514	0.159618	0.381596	1.53309	-5.49681
Kid. Cortex	Mouse	Gemin8	Gemin8	B1AVP5;Q8BHE1	Gem nuclear organelle associated protein 8;Gem-associated protein 8	0.324253	9.76013	0.0562671	0.212369	2.1898	-4.54426
Kid. Cortex	Mouse	Gm14744	Gm14744;5430402E10Rik	B1AVU4;Q9D3N5	Predicted gene 14744;RIKEN cDNA 5430402E10 gene	0.279955	9.85962	0.301066	0.538562	1.10552	-5.95627
Kid. Cortex	Mouse	Gabra3	Gabra3	B1AVY2;P26049	Gamma-aminobutyric acid (GABA) A receptor, subunit alpha 3;Gamma-aminobutyric acid receptor subunit alpha-3	0.453404	7.9981	0.143377	0.361856	1.62238	-5.33087
Kid. Cortex	Mouse	Uprt	Uprt	B1AVZ0	Uracil phosphoribosyltransferase homolog	0.0819525	12.2263	0.545995	0.753259	0.62738	-6.42457
Kid. Cortex	Mouse	Mtm1	Mtm1	B1AW21;Q9Z2C5	Phosphatidylinositol-3,5-bisphosphate 3-phosphatase;Myotubularin	-0.0284867	12.8262	0.651911	0.818841	-0.466546	-6.51745
Kid. Cortex	Mouse	Arhgap15	Arhgap15	B1AW40;Q811M1	Rho GTPase activating protein 15;Rho GTPase-activating protein 15	-0.142638	11.0407	0.533868	0.744338	-0.654214	-6.27559
Kid. Cortex	Mouse	Clta	Clta	B1AWE0;Q6PFA2	Clathrin light chain	0.0578478	15.5316	0.590819	0.780109	0.55744	-6.4681
Kid. Cortex	Mouse	Npr2	Npr2	B1AWI7;F6YT88;Q6VVW5	guanylate cyclase;Guanylate cyclase (Fragment);Atrial natriuretic peptide receptor 2	0.0316934	10.3054	0.878566	0.942868	0.157746	-6.56944
Kid. Cortex	Mouse	Meis2	Meis2	B1AWK4;P97367;Q3TYM2	Meis homeobox 2;Homeobox protein Meis2;Meis homeobox 2	0.552511	8.69385	0.0181164	0.114573	2.88205	-3.44311
Kid. Cortex	Mouse	Suco	Suco	A0A0A6YX94	SUN domain containing ossification factor (Fragment)		8.43407
Kid. Cortex	Mouse	Espn	Espn	B1AWP7;B1AWP8;B1AWP9;B1AWQ0;B1AWQ3;B1AWQ4;Q9ET47	Espin	-0.161949	12.4614	0.177886	0.405023	-1.46153	-5.5901
Kid. Cortex	Mouse	Tek	Tek	B1AWS8;Q80YS4	receptor protein-tyrosine kinase	-0.0601634	12.0543	0.378924	0.610371	-0.925356	-6.18851
Kid. Cortex	Mouse	Rragd	Rragd	B1AWT2;B1AWT3;Q7TT45	Ras-related GTP-binding protein;Ras-related GTP-binding protein;Ras-related GTP-binding protein D	0.178574	13.2673	0.105939	0.305489	1.79671	-5.13255
Kid. Cortex	Mouse	Dmrtc1a	Dmrtc1a;Dmrtc1	B1AX33;Q9D9R7	DMRT-like family C1a;Doublesex- and mab-3-related transcription factor C1	-0.0964975	9.21144	0.862804	0.935007	-0.181902	-6.31478
Kid. Cortex	Mouse	Nhsl2	Nhsl2	B1AXH1	NHS-like protein 2	-0.0332179	11.2049	0.712738	0.853173	-0.380026	-6.55666
Kid. Cortex	Mouse	Cep131	Cep131	B1AXI9;J3QMP9;Q62036	5-azacytidine induced gene 1;Centrosomal protein 131;Centrosomal protein of 131 kDa	0.603979	9.88381	0.256903	0.494756	1.22084	-5.83005
Kid. Cortex	Mouse	Tomm5	Tomm5	B1AXP6	Mitochondrial import receptor subunit TOM5 homolog	0.338959	11.8568	0.065992	0.23235	2.09177	-4.69483
Kid. Cortex	Mouse	Zmym3	Zmym3	B1AXS7;B1AXS8;Q9JLM4	Zinc finger, MYM-type 3;Zinc finger, MYM-type 3;Zinc finger MYM-type protein 3	0.0287532	9.20535	0.951896	0.976922	0.0620283	-6.63279
Kid. Cortex	Mouse	Nfx1	Nfx1	B1AY10	Transcriptional repressor NF-X1	-0.226071	9.88684	0.164556	0.38731	-1.51306	-5.52318
Kid. Cortex	Mouse	Usp24	Usp24	B1AY13;E9PV45	Ubiquitin carboxyl-terminal hydrolase 24;ubiquitinyl hydrolase 1	0.0309076	12.7581	0.639665	0.811696	0.484409	-6.50841
Kid. Cortex	Mouse	Ndufs2	Ndufs2	A0A0A6YXD3	NADH dehydrogenase [ubiquinone] iron-sulfur protein 2, mitochondrial (Fragment)	0.148486	9.70229	0.368717	0.601326	0.952527	-6.10928
Kid. Cortex	Mouse	Gtdc1	Gtdc1	B1AY87;G8JL42;Q8BW56	Glycosyltransferase-like domain-containing protein 1 (Fragment);Glycosyltransferase-like domain-containing protein 1;Glycosyltransferase-like domain-containing protein 1		8.7073
Kid. Cortex	Mouse	Itgb6	Itgb6	B1AYG6;B1AYG7;Q9Z0T9	Integrin beta;Integrin beta (Fragment);Integrin beta-6	0.16494	14.0657	0.245818	0.483568	1.24145	-5.85902
Kid. Cortex	Mouse	Scn7a	Scn7a	B1AYL1	Sodium channel protein	0.18238	9.79483	0.292705	0.529692	1.12625	-5.93424
Kid. Cortex	Mouse	Cwc22	Cwc22	B1AYU4;B1AYU7;Q8C5N3	CWC22 spliceosome-associated protein;CWC22 spliceosome-associated protein;Pre-mRNA-splicing factor CWC22 homolog	0.43346	10.5946	0.0172841	0.111913	2.91093	-3.39656
Kid. Cortex	Mouse	Cobll1	Cobll1	B1AZ26	Cobl-like 1 (Fragment)	-0.100505	11.3967	0.587812	0.77909	-0.562038	-6.46538
Kid. Cortex	Mouse	Chmp6	Chmp6	B1AZ42;P0C0A3	Charged multivesicular body protein 6 (Fragment);Charged multivesicular body protein 6	-0.252632	11.7787	0.160837	0.382627	-1.5281	-5.5034
Kid. Cortex	Mouse	Baiap2	Baiap2	B1AZ46	Brain-specific angiogenesis inhibitor 1-associated protein 2	0.509976	11.3055	0.188856	0.417922	1.42159	-5.641
Kid. Cortex	Mouse	Otud3	Otud3	B1AZ99	OTU domain-containing protein 3	0.112263	9.77339	0.620345	0.799204	0.51294	-6.49329
Kid. Cortex	Mouse	Tmem245	Tmem245	B1AZA5;D3YWD3	Transmembrane protein 245	0.00951992	11.4215	0.935495	0.968943	0.0832235	-6.63111
Kid. Cortex	Mouse	Thoc2	Thoc2	B1AZI6	THO complex subunit 2	0.115284	12.374	0.0980185	0.29176	1.84569	-5.06179
Kid. Cortex	Mouse	Mast4	Mast4	A0A0A6YXG1;A0A668KMA1;E9PWX8;E9QPR4;Q811L6	non-specific serine/threonine protein kinase;non-specific serine/threonine protein kinase;non-specific serine/threonine protein kinase;non-specific serine/threonine protein kinase;Microtubule-associated serine/threonine-protein kinase 4	0.168795	10.051	0.0560068	0.212243	2.19265	-4.53985
Kid. Cortex	Mouse	Dlgap4	Dlgap4	B1AZP2;B7ZNS2	Disks large-associated protein 4;DLG associated protein 4	0.0625044	11.1677	0.588492	0.779774	0.560997	-6.466
Kid. Cortex	Mouse	Ppm1d	Ppm1d	B1B0B1;Q9QZ67	Protein phosphatase 1D magnesium-dependent, delta isoform (Fragment);Protein phosphatase 1D	-0.367831	8.93123	0.0257224	0.138196	-2.82133	-3.56778
Kid. Cortex	Mouse	Nrk	Nrk	B1B0C9;D6RFR0;Q9R0G8	Nik related kinase;Nik related kinase;Nik-related protein kinase	0.653516	11.4018	0.166647	0.39027	1.50474	-5.53408
Kid. Cortex	Mouse	Mylk	Mylk	B1B1A8;Q6PDN3	Myosin light chain kinase, smooth muscle;Myosin light chain kinase, smooth muscle	0.430293	14.5979	0.000146049	0.011573	6.27016	1.41141
Kid. Cortex	Mouse	Mrpl2	Mrpl2	B1B1D8;Q9D773	Mitochondrial ribosomal protein L2;39S ribosomal protein L2, mitochondrial	-0.0970437	12.9143	0.250967	0.489356	-1.22695	-5.8757
Kid. Cortex	Mouse	Taf1	Taf1	B1Q2W7;D3YZK4;Q80UV9;S4R1B9	Transcription initiation factor TFIID subunit;Transcription initiation factor TFIID subunit;Transcription initiation factor TFIID subunit 1;TATA-box binding protein associated factor 1	0.0161596	10.6442	0.888223	0.947577	0.144587	-6.62349
Kid. Cortex	Mouse	Bltp3a	Bltp3a	B2KF50	UHRF1 (ICBP90) binding protein 1	-0.00556915	12.681	0.926887	0.96506	-0.0943649	-6.63003
Kid. Cortex	Mouse	Serf1	Serf1;Serf1;Serf2	B2KF73;O88892;P84102	Small EDRK-rich factor 1;Small EDRK-rich factor 1;Small EDRK-rich factor 2	1.39032	6.84709	0.00924025	0.0782139	6.00662	-1.9224
Kid. Cortex	Mouse	Bicd1	Bicd1	B2KG46;G3UXK5;Q8BR07	BICD cargo adaptor 1;BICD cargo adaptor 1;Protein bicaudal D homolog 1	-0.0381514	9.96424	0.733196	0.86572	-0.351646	-6.56783
Kid. Cortex	Mouse	Zbtb8os	Zbtb8os	B2KGA7;Q505B7	Protein archease	-0.0269778	12.1479	0.775353	0.88961	-0.294097	-6.58789
Kid. Cortex	Mouse	Cept1	Cept1	A0A0A6YXR0;Q8BGS7	Choline/ethanolaminephosphotransferase 1 (Fragment);Choline/ethanolaminephosphotransferase 1	0.266329	12.1373	0.22027	0.454907	1.32973	-5.70318
Kid. Cortex	Mouse	Lancl1	Lancl1	B2KGR2;O89112	LanC (bacterial lantibiotic synthetase component C)-like 1 (Fragment);Glutathione S-transferase LANCL1	-0.143146	12.4511	0.112319	0.314967	-1.75967	-5.18547
Kid. Cortex	Mouse	Cpsf4	Cpsf4	B2LVG5;B2LVG6;E0CXT7;F7B6Z5;Q8BQZ5	Cleavage and polyadenylation specificity factor subunit 4;Cleavage and polyadenylation specificity factor subunit 4;Cleavage and polyadenylation specificity factor subunit 4;Cleavage and polyadenylation specificity factor subunit 4 (Fragment);Cleavage and polyadenylation specificity factor subunit 4	-0.22055	10.6888	0.0440336	0.185455	-2.3398	-4.3102
Kid. Cortex	Mouse	Hnrnpk	Hnrnpk	B2M1R6	Heterogeneous nuclear ribonucleoprotein K	0.127969	15.9821	0.0450983	0.18811	2.32521	-4.33313
Kid. Cortex	Mouse	Pcbp2	Pcbp2	B2M1R7;Q61990	Poly(RC) binding protein 2;Poly(rC)-binding protein 2	0.150059	14.557	0.0479884	0.194877	2.28725	-4.39263
Kid. Cortex	Mouse	Plekhd1	Plekhd1	B2RPU2	Pleckstrin homology domain-containing family D member 1	-0.461551	10.1289	0.0321373	0.1574	-2.53184	-4.00573
Kid. Cortex	Mouse	Mdm1	Mdm1	B2RPU6;E9PW14;E9Q0B1;Q9D067	Nuclear protein MDM1	-0.260717	10.3128	0.295771	0.532431	-1.11	-6.00493
Kid. Cortex	Mouse	Zbed5	Zbed5	B2RPU8	Coiled-coil-helix-coiled-coil-helix domain containing 2-like	0.0698541	11.1702	0.41247	0.642887	0.859311	-6.24756
Kid. Cortex	Mouse	Abl2	Abl2	B2RQ57;F8VQH0;Q4JIM5	Tyrosine-protein kinase;Tyrosine-protein kinase;Tyrosine-protein kinase ABL2	0.124038	10.4265	0.107486	0.308198	1.78754	-5.1457
Kid. Cortex	Mouse	Dip2c	Dip2c	B2RQ71;E9PWR4	Dip2c protein;Disco interacting protein 2 homolog C	-0.158334	11.6278	0.0927694	0.282397	-1.88024	-5.01138
Kid. Cortex	Mouse	Kcna10	Kcna10	B2RQA1	Potassium voltage-gated channel subfamily A member 10	-1.08381	13.2016	0.0543837	0.209089	-2.21068	-4.51192
Kid. Cortex	Mouse	Apeh	Apeh	A0A0A6YXV0	Acylpeptide hydrolase (Fragment)	-0.181948	13.9309	0.100749	0.296279	-1.8284	-5.08686
Kid. Cortex	Mouse	Usp42	Usp42	B2RQC2	Ubiquitin carboxyl-terminal hydrolase 42	0.37164	8.00261	0.146261	0.364542	1.60909	-5.31876
Kid. Cortex	Mouse	Cad	Cad	B2RQC6;E9QAI5	CAD protein	0.230985	12.3297	0.106497	0.306652	1.79339	-5.13731
Kid. Cortex	Mouse	Dip2b	Dip2b	B2RQC7	DIP2 disco-interacting protein 2 homolog B (Drosophila)	0.048028	9.20609	0.80595	0.905518	0.253003	-6.60006
Kid. Cortex	Mouse	Arhgap42	Arhgap42	B2RQE8	Rho GTPase-activating protein 42	0.0425328	11.1433	0.771856	0.887491	0.298828	-6.58637
Kid. Cortex	Mouse	Phf3	Phf3	B2RQG2	PHD finger protein 3	0.0722211	11.412	0.331029	0.567752	1.02745	-6.09026
Kid. Cortex	Mouse	Stox1	Stox1	B2RQL2	Storkhead-box protein 1	-0.179275	11.5933	0.0513261	0.201753	-2.24612	-4.45684
Kid. Cortex	Mouse	Sgsm1	Sgsm1	B2RQR5;D3YUT7;D3Z7V4;Q8BPQ7	Small G protein signaling modulator 1;Small G protein signaling modulator 1 (Fragment);Small G protein signaling modulator 1;Small G protein signaling modulator 1		8.73157
Kid. Cortex	Mouse	Strn3	Strn3	B2RQS1	Striatin, calmodulin binding protein 3	0.0255703	12.6572	0.690272	0.840765	0.411585	-6.54325
Kid. Cortex	Mouse	Itsn2	Itsn2	B2RR82;E9QNG1;Q9Z0R6	Intersectin 2;Intersectin 2;Intersectin-2	0.00807419	12.792	0.88771	0.947494	0.145256	-6.62339
Kid. Cortex	Mouse	Ythdc2	Ythdc2	B2RR83	3'-5' RNA helicase YTHDC2	0.114858	11.0044	0.111134	0.313656	1.7664	-5.17589
Kid. Cortex	Mouse	Cyb561d2	Cyb561d2	A0A0A6YY22;Q9WUE3	Cytochrome b-561 domain containing 2;Transmembrane reductase CYB561D2	-0.0951522	10.568	0.630334	0.805647	-0.500299	-6.44716
Kid. Cortex	Mouse	Brpf1	Brpf1	B2RRD7;Q3U109;Q80XK2	Peregrin;Bromodomain and PHD finger containing, 1;Bromodomain and PHD finger containing, 1	0.173092	10.1712	0.112569	0.315439	1.75826	-5.18748
Kid. Cortex	Mouse	Sbno1	Sbno1	B2RRI2;F7CVW0	Sbno1 protein;Strawberry notch 1 (Fragment)	0.0730851	11.5143	0.536294	0.745757	0.642944	-6.41424
Kid. Cortex	Mouse	Gnai1	Gnai1	B2RSH2	Guanine nucleotide-binding protein G(i) subunit alpha-1	-0.219237	13.0441	0.0344911	0.163387	-2.48876	-4.0744
Kid. Cortex	Mouse	Zfc3h1	Zfc3h1	B2RT41	Zinc finger, C3H1-type containing	-0.811522	9.2162	0.0456844	0.189029	-2.31732	-4.34551
Kid. Cortex	Mouse	Slc22a28	Slc22a28	B2RT89	Predicted gene, EG434674	-0.0427699	13.8071	0.954109	0.978026	-0.0591707	-6.63298
Kid. Cortex	Mouse	Kctd21	Kctd21	B2RTJ2;Q3URF8	Potassium channel tetramerisation domain containing 21;BTB/POZ domain-containing protein KCTD21	0.1051	10.3071	0.518438	0.73236	0.672036	-6.39432
Kid. Cortex	Mouse	Ybx2	Ybx2	B2RUF0	Y box protein 2	-0.0478551	14.5749	0.589974	0.780106	-0.55873	-6.46734
Kid. Cortex	Mouse	Apc	Apc	B2RUG9	APC, WNT signaling pathway regulator	-0.0670602	9.7689	0.584215	0.776915	-0.567554	-6.4621
Kid. Cortex	Mouse	Rapgef6	Rapgef6	B2RUJ6;Q5NCJ0;Q5NCJ1	Rap guanine nucleotide exchange factor (GEF) 6	0.102817	10.7285	0.364462	0.597265	0.955125	-6.16072
Kid. Cortex	Mouse	Arhgap12	Arhgap12	B2RUJ8	Rho GTPase activating protein 12	0.0775502	10.891	0.446405	0.672997	0.796203	-6.30051
Kid. Cortex	Mouse	Btbd18	Btbd18	A0A0A6YY25	BTB/POZ domain-containing protein 18	0.0232896	10.9457	0.89026	0.94863	0.142432	-6.57197
Kid. Cortex	Mouse	Otud7b	Otud7b	B2RUR8	OTU domain-containing protein 7B	0.0818042	11.2105	0.337582	0.573221	1.01286	-6.1048
Kid. Cortex	Mouse	Cstdc4	Cstdc4	B2RV77	Cystatin domain containing 4	-1.89642	11.5377	0.0366634	0.168567	-2.45153	-4.13358
Kid. Cortex	Mouse	Zcchc24	Zcchc24	B2RVL6	Zinc finger CCHC domain-containing protein 24	0.427513	8.61805	0.11986	0.326955	1.87356	-4.8028
Kid. Cortex	Mouse	Ep300	Ep300	B2RWS6	Histone acetyltransferase p300	0.250665	10.3563	0.121657	0.329615	1.70882	-5.25727
Kid. Cortex	Mouse	Cspp1	Cspp1	B2RX88	Centrosome and spindle pole associated protein 1	-0.656381	8.83313	0.00105152	0.0250552	-4.74491	-0.575946
Kid. Cortex	Mouse	Trappc11	Trappc11	B2RXC1	Trafficking protein particle complex subunit 11	-0.034113	12.4386	0.629525	0.805045	-0.499329	-6.50061
Kid. Cortex	Mouse	Itpkb	Itpkb	B2RXC2	Kinase	0.0400964	10.5721	0.64035	0.812241	0.483406	-6.50893
Kid. Cortex	Mouse	Polr3a	Polr3a	B2RXC6	DNA-directed RNA polymerase subunit	0.0759992	11.1486	0.440257	0.667211	0.807389	-6.29138
Kid. Cortex	Mouse	Ppp2r3a	Ppp2r3a	B2RXC8	3222402P14Rik protein	0.0552771	10.512	0.61709	0.796842	0.51779	-6.49064
Kid. Cortex	Mouse	Ppfia1	Ppfia1	B2RXQ2;B2RXW8	Ppfia1 protein	-0.0978678	12.1137	0.160903	0.382627	-1.52782	-5.50376
Kid. Cortex	Mouse	Ncam1	Ncam1	A0A0A6YY47;E9QB01	Neural cell adhesion molecule 1	0.341914	9.53969	0.250171	0.488576	1.22918	-5.87314
Kid. Cortex	Mouse	Nek1	Nek1	B2RXQ4;B2RXX0;B7ZWK0;P51954	NIMA (never in mitosis gene a)-related expressed kinase 1;NIMA (never in mitosis gene a)-related expressed kinase 1;NIMA (never in mitosis gene a)-related expressed kinase 1;Serine/threonine-protein kinase Nek1	-0.0463257	9.84647	0.476119	0.698968	-0.743534	-6.34202
Kid. Cortex	Mouse	Sorbs2	Sorbs2	B2RXQ9	Sorbin and SH3 domain containing 2	0.620932	11.9527	0.000157085	0.011573	6.20923	1.33875
Kid. Cortex	Mouse	Ankrd44	Ankrd44	B2RXR6;E9QNQ2	Serine/threonine-protein phosphatase 6 regulatory ankyrin repeat subunit B;Ankyrin repeat domain 44	0.354146	11.1841	0.00105648	0.0250878	4.74156	-0.580713
Kid. Cortex	Mouse	Scaper	Scaper	B2RXS3;F8VQ70;Q8BIZ8	S phase cyclin A-associated protein in the ER	-0.235286	12.3464	0.205919	0.439478	-1.36328	-5.7137
Kid. Cortex	Mouse	Plxnb2	Plxnb2	B2RXS4	Plexin-B2	-0.0289167	13.7501	0.586807	0.778689	-0.563577	-6.46447
Kid. Cortex	Mouse	Ogdhl	Ogdhl	B2RXT3	oxoglutarate dehydrogenase (succinyl-transferring)	-0.446018	12.4257	0.193392	0.423632	-1.40566	-5.66105
Kid. Cortex	Mouse	Flvcr1	Flvcr1	B2RXV4	Feline leukemia virus subgroup C receptor-related protein 1	-1.2718	10.8603	0.185781	0.414705	-1.43258	-5.62708
Kid. Cortex	Mouse	Cyp2a22	Cyp2a22	B2RXZ2	Cytochrome P450	-0.163858	12.7196	0.726491	0.861538	-0.360913	-6.56427
Kid. Cortex	Mouse	Dock5	Dock5	B2RY04	Dedicator of cytokinesis protein 5	0.0250007	11.8828	0.736781	0.867545	0.346705	-6.56969
Kid. Cortex	Mouse	Gm6133	Gm6133	B2RY53	60S ribosomal protein L17	-0.229412	8.96394	0.563163	0.764089	-0.603071	-6.38693
Kid. Cortex	Mouse	Ighg2c	Ighg2c;Ighg2c;	A0A0A6YY53;F6TQW2;P01864	Immunoglobulin heavy constant gamma 2C (Fragment);Immunoglobulin heavy constant gamma 2C (Fragment);Ig gamma-2A chain C region secreted form	0.671509	11.4162	0.124259	0.333658	1.69528	-5.2762
Kid. Cortex	Mouse	Rbm25	Rbm25	B2RY56	RNA-binding protein 25	0.0480169	12.885	0.481383	0.703152	0.734427	-6.34894
Kid. Cortex	Mouse	Tcf25	Tcf25	B2ZAC8;Q8R3L2	Nuclear localized protein-1 isoform d (Fragment);Transcription factor 25	0.0168469	11.5465	0.909985	0.957081	0.116278	-6.62752
Kid. Cortex	Mouse	Nfatc1	Nfatc1	B5B2N2;B5B2N4;B5B2N7;Q6P7T9	Nuclear factor of activated T cells, cytoplasmic, calcineurin dependent 1;Nuclear factor of activated T cells, cytoplasmic, calcineurin dependent 1;Nuclear factor of activated T cells, cytoplasmic, calcineurin dependent 1;Nuclear factor of activated T-cells c1 isoform IA-IXS	0.188169	10.1352	0.295911	0.532431	1.10966	-6.00529
Kid. Cortex	Mouse	Nfatc3	Nfatc3	B5B2U1;B5B2U2;P97305;Q3UZ64	Nuclear factor of activated T cells, cytoplasmic, calcineurin dependent 3;Nuclear factor of activated T cells, cytoplasmic, calcineurin dependent 3;Nuclear factor of activated T-cells, cytoplasmic 3;Nuclear factor of activated T-cells c3 isoform IB-deltaXa	-0.080438	8.77892	0.564194	0.764454	-0.598607	-6.44305
Kid. Cortex	Mouse	Flna	Flna	B7FAU9;Q8BTM8	Filamin, alpha;Filamin-A	0.653717	15.5849	0.000206328	0.0124667	5.98459	1.06616
Kid. Cortex	Mouse	Glrx2	Glrx2	B7ZC40;Q923X4	Glutaredoxin 2 (thioltransferase);Glutaredoxin-2, mitochondrial	-0.328066	11.7908	0.276008	0.513591	-1.1597	-5.95117
Kid. Cortex	Mouse	Septin8	Septin8	B7ZC46	Septin	0.141061	9.63512	0.315031	0.552318	1.0719	-5.99136
Kid. Cortex	Mouse	Crocc	Crocc	B7ZC90	Ciliary rootlet coiled-coil, rootletin (Fragment)	-0.25293	11.8198	0.0890371	0.275345	-1.90594	-4.97363
Kid. Cortex	Mouse	Gm28042	Gm28042;Gm28042;Gm28042;Jmjd7	B7ZCM9;B7ZCN0;E0CXG8;P0C872	Phospholipase A2;Phospholipase A2;Predicted gene, 28042;Bifunctional peptidase and (3S)-lysyl hydroxylase Jmjd7	-0.0581462	10.7909	0.304162	0.541388	-1.08969	-6.02639
Kid. Cortex	Mouse	Zfp512b	Zfp512b	B7ZCR6;Q6PHP4	Zinc finger protein 512B;Zinc finger protein 512B (Fragment)	0.0771345	11.0188	0.358577	0.592202	0.967488	-6.14897
Kid. Cortex	Mouse	Ighv14-4	Ighv14-4	A0A075B5S3;A0A0A6YVR1	Immunoglobulin heavy variable 14-4;Immunoglobulin heavy variable 14-4 (Fragment)		10.0066
Kid. Cortex	Mouse	Camsap2	Camsap2	A0A0A6YY67;H7BX08;Q8C1B1	Calmodulin regulated spectrin-associated protein family, member 2;Calmodulin regulated spectrin-associated protein family, member 2;Calmodulin-regulated spectrin-associated protein 2	0.161107	10.7046	0.128912	0.339406	1.67172	-5.30899
Kid. Cortex	Mouse	Abi1	Abi1	B7ZCU0;B7ZCU2;B7ZCU3;B7ZCU4;B7ZCU5;J3QNK8;Q8CBW3	Abl interactor 1	0.058387	12.87	0.466161	0.690547	0.760939	-6.32858
Kid. Cortex	Mouse	Hdac5	Hdac5	B7ZDF5;B7ZDF7;Q3UJF1	Histone deacetylase	0.291274	11.8492	0.0127256	0.0940629	3.09981	-3.0923
Kid. Cortex	Mouse	Xpnpep3	Xpnpep3	B7ZMP1	Xaa-Pro aminopeptidase 3	-0.115337	12.9553	0.219515	0.454036	-1.3197	-5.76673
Kid. Cortex	Mouse	Papln	Papln	B7ZN28	Papilin, proteoglycan-like sulfated glycoprotein	0.430319	12.1676	0.0419333	0.179923	2.36963	-4.26321
Kid. Cortex	Mouse	Arl15	Arl15	B7ZN40;Q8BGR6	ADP-ribosylation factor-like 15;ADP-ribosylation factor-like protein 15	0.0208225	11.226	0.852035	0.929466	0.19196	-6.61481
Kid. Cortex	Mouse	Asah2	Asah2	B7ZN55;Q9JHE3	Neutral ceramidase	-0.14159	11.3512	0.086792	0.271752	-1.92189	-4.95009
Kid. Cortex	Mouse	Phc3	Phc3	B7ZNA5;D3YY34;Q8CHP6	Phc3 protein;Polyhomeotic 3;Polyhomeotic-like protein 3	-0.0123858	10.8158	0.868441	0.937916	-0.170431	-6.61906
Kid. Cortex	Mouse	Col14a1	Col14a1	B7ZNH7	Collagen, type XIV, alpha 1	0.496022	15.118	0.00119302	0.0266393	4.65528	-0.703849
Kid. Cortex	Mouse	Nap1l4	Nap1l4	B7ZNL2;Q78ZA7	Nap1l4 protein;Nucleosome assembly protein 1-like 4	0.0223524	13.5669	0.705012	0.84906	0.390832	-6.55218
Kid. Cortex	Mouse	Tpm1	Tpm1	B7ZNL3	Tpm1 protein	1.10511	13.1501	0.150872	0.371087	1.56995	-5.44774
Kid. Cortex	Mouse	Pcdh7	Pcdh7	A0A0A6YY83;A2RS43;E9Q2S0	Protocadherin 7	0.236636	9.95567	0.185444	0.414323	1.43379	-5.62554
Kid. Cortex	Mouse	Tatdn2	Tatdn2	B7ZNL9;F8VQE6	TatD DNase domain containing 2	-1.58886	9.50881	0.0134984	0.0977955	-5.24367	-2.22118
Kid. Cortex	Mouse	Erbin	Erbin	B7ZNX6	Erbb2 interacting protein	-0.00897216	11.1109	0.943336	0.973045	-0.0730863	-6.63198
Kid. Cortex	Mouse	Cyp2d12	Cyp2d12	B7ZP10;Q8BVD2	Cyp2d12 protein;Cytochrome P450	-0.419049	11.8534	0.106624	0.306791	-1.79264	-5.13839
Kid. Cortex	Mouse	Wapl	Wapl	B7ZP47;Q65Z40	WAPL cohesin release factor;Wings apart-like protein homolog	0.0568919	11.2453	0.345249	0.581044	0.996049	-6.12135
Kid. Cortex	Mouse	Mup14	Mup14	B8JI96	Major urinary protein 14 (Fragment)	1.33743	13.2065	0.186905	0.415947	1.44337	-5.5636
Kid. Cortex	Mouse	2310061I04Rik	2310061I04Rik	B8JJ66;B8JJ69	RIKEN cDNA 2310061I04 gene	-0.286764	11.6621	0.0199286	0.120937	-2.8236	-3.53732
Kid. Cortex	Mouse	Tdp1	Tdp1	B8JJC1;Q8BJ37	Tyrosyl-DNA phosphodiesterase 1	0.267762	9.68007	0.165608	0.389058	1.52565	-5.4284
Kid. Cortex	Mouse	Gm20547	Gm20547	B8JJN0	Complement C2	0.310482	12.7869	0.0952019	0.2873	1.86401	-5.03512
Kid. Cortex	Mouse	Itga9	Itga9	B8JK39	Integrin alpha-9	0.148649	10.4802	0.186278	0.415523	1.43079	-5.62935
Kid. Cortex	Mouse	Pigp	Pigp	B8JK66;B8JK67;Q9JHG1	Phosphatidylinositol N-acetylglucosaminyltransferase subunit P;Phosphatidylinositol glycan anchor biosynthesis, class P;Phosphatidylinositol N-acetylglucosaminyltransferase subunit P	0.00570618	9.47751	0.975621	0.987956	0.0314189	-6.63436
Kid. Cortex	Mouse	Ncam1	Ncam1	A0A0A6YY91;P13595	Neural cell adhesion molecule 1 (Fragment);Neural cell adhesion molecule 1	0.263938	11.6444	0.113513	0.317085	1.75295	-5.19501
Kid. Cortex	Mouse	Amotl2	Amotl2	B8JK81;B8JK87;Q3TP05;Q8K371	Angiomotin-like 2 (Fragment);Angiomotin-like 2;Angiomotin-like 2;Angiomotin-like protein 2	0.819165	8.61192	0.0289726	0.147746	3.94813	-2.90092
Kid. Cortex	Mouse	Amn1	Amn1	B8JKU8;B8JKU9;B8JKV0	Antagonist of mitotic exit network 1;Antagonist of mitotic exit network 1 (Fragment);Protein AMN1 homolog	0.30273	9.84598	0.113388	0.316921	1.75366	-5.19402
Kid. Cortex	Mouse	Atm	Atm	B9EHX4;Q62388	Serine-protein kinase ATM	0.131233	10.0271	0.111199	0.313747	1.76603	-5.17642
Kid. Cortex	Mouse	Zmat3	Zmat3	B9EI21;O54836	Zinc finger matrin type 3;Zinc finger matrin-type protein 3	0.00351729	9.73962	0.984368	0.99291	0.0202142	-6.55128
Kid. Cortex	Mouse	Reps2	Reps2	B9EI38;Q80XA6	RALBP1 associated Eps domain containing protein 2;RalBP1-associated Eps domain-containing protein 2	-0.0321865	11.3115	0.710876	0.852458	-0.382626	-6.55559
Kid. Cortex	Mouse	Ncoa7	Ncoa7	B9EIW5	Ncoa7 protein	-0.257278	12.0941	0.0120576	0.0906316	-3.13326	-3.03852
Kid. Cortex	Mouse	Dcp1b	Dcp1b	B9EIX0;Q3U564	5'-(N(7)-methylguanosine 5'-triphospho)-[mRNA] hydrolase;mRNA-decapping enzyme 1B	0.455502	9.62595	0.111386	0.313902	1.76497	-5.17794
Kid. Cortex	Mouse	Nup205	Nup205	B9EJ54	Nucleoporin 205	0.181839	12.8019	0.0363249	0.167493	2.45718	-4.1246
Kid. Cortex	Mouse	Pdzd8	Pdzd8	B9EJ80	PDZ domain-containing protein 8	-0.0574531	14.5678	0.385894	0.617314	-0.911299	-6.20139
Kid. Cortex	Mouse	Osbpl8	Osbpl8	B9EJ86	Oxysterol-binding protein-related protein 8	0.0338639	13.4401	0.795719	0.900712	0.266688	-6.59621
Kid. Cortex	Mouse	Igkv4-57	Igkv4-57;Igkv4-72;Igkv4-55	A0A0A6YYE7;A0A0B4J1I4;A0A0B4J1I9	Immunoglobulin kappa variable 4-57 (Fragment);Immunoglobulin kappa chain variable 4-72 (Fragment);Immunoglobulin kappa variable 4-55 (Fragment)		7.8249
Kid. Cortex	Mouse	Cttnbp2	Cttnbp2	B9EJA2	Cortactin-binding protein 2	0.117238	9.61128	0.497405	0.715047	0.707096	-6.36926
Kid. Cortex	Mouse	Tmem229a	Tmem229a	B9EJI9	Transmembrane protein 229A	-0.0439641	11.0621	0.84213	0.924551	-0.205004	-6.612
Kid. Cortex	Mouse	Dnaaf5	Dnaaf5	B9EJR8	Dynein axonemal assembly factor 5	-0.0143035	11.7065	0.815704	0.910577	-0.240004	-6.60354
Kid. Cortex	Mouse	Taf2	Taf2	B9EJX5	Transcription initiation factor TFIID subunit 2	-0.125226	9.58921	0.635398	0.808758	-0.490673	-6.50516
Kid. Cortex	Mouse	Tmf1	Tmf1	B9EKI3	TATA element modulatory factor	-0.0517097	13.1561	0.425293	0.655995	-0.835063	-6.26831
Kid. Cortex	Mouse	Cblb	Cblb	B9EKI5;Q3TTA7	E3 ubiquitin-protein ligase CBL;E3 ubiquitin-protein ligase CBL-B	0.46257	10.8519	0.000936949	0.0238478	4.82756	-0.459098
Kid. Cortex	Mouse	Arxes1	Arxes1;Arxes2	C0HK79;C0HK80	Adipocyte-related X-chromosome expressed sequence 1;Adipocyte-related X-chromosome expressed sequence 2	0.448405	8.61872	0.111587	0.314099	1.76382	-5.17957
Kid. Cortex	Mouse	Mfap1a	Mfap1a;Mfap1b	C0HKD8;C0HKD9	Microfibrillar-associated protein 1A;Microfibrillar-associated protein 1B	0.223661	11.2155	0.0787384	0.25727	1.98252	-4.85992
Kid. Cortex	Mouse	P2rx7	P2rx7	C8YIX4;Q9Z1M0	P2X purinoceptor;P2X purinoceptor 7	0.451466	10.2153	0.0810743	0.261584	1.96435	-4.88706
Kid. Cortex	Mouse	Mtx3	Mtx3	D3YTP3	Metaxin	-0.316286	11.3491	0.0122158	0.0916042	-3.12516	-3.05152
Kid. Cortex	Mouse	Igsf5	Igsf5	A0A0B4J1E1;A0A0R4J105;Q7TSN7	Immunoglobulin superfamily, member 5;Immunoglobulin superfamily, member 5;Immunoglobulin superfamily member 5	-0.262954	10.6808	0.2947	0.531539	-1.11263	-6.00213
Kid. Cortex	Mouse	Lsm4	Lsm4	D3YTP8;Q9CY46;Q9QXA5	U6 snRNA-associated Sm-like protein LSm4 (Fragment);U6 snRNA-associated Sm-like protein LSm4;U6 snRNA-associated Sm-like protein LSm4	0.0765441	12.5688	0.489913	0.71043	0.719805	-6.3599
Kid. Cortex	Mouse	Mex3d	Mex3d	D3YTR3	Mex3 RNA binding family member D	0.440938	9.03526	0.0373948	0.169692	2.43949	-4.15269
Kid. Cortex	Mouse	Mbd3	Mbd3	D3YTR5;Q9Z2D8	Methyl-CpG binding domain protein 3;Methyl-CpG-binding domain protein 3	0.000739718	10.792	0.995608	0.998226	0.00565919	-6.63488
Kid. Cortex	Mouse	Spns1	Spns1	D3YTR6;Q8R0G7	Spinster homolog 1;Protein spinster homolog 1	0.510412	10.3411	0.00204237	0.0351369	4.28245	-1.24874
Kid. Cortex	Mouse	Sec11a	Sec11a	D3YTS1;D3YWT0;D3Z569;Q9R0P6	Signal peptidase complex catalytic subunit SEC11;Signal peptidase complex catalytic subunit SEC11;Signal peptidase complex catalytic subunit SEC11;Signal peptidase complex catalytic subunit SEC11A	-0.0186184	13.7335	0.884485	0.946237	-0.149462	-6.62271
Kid. Cortex	Mouse	D630045J12Rik	D630045J12Rik;Kiaa1549	D3YTS3;Q68FD9	RIKEN cDNA D630045J12 gene;UPF0606 protein KIAA1549	0.735619	9.17604	0.119516	0.32627	1.77296	-5.06299
Kid. Cortex	Mouse	Efna1	Efna1	D3YTT5;P52793	Ephrin A1;Ephrin-A1	-0.206693	9.30115	0.295903	0.532431	-1.10968	-6.00527
Kid. Cortex	Mouse	Osbpl3	Osbpl3	D3YTT6	Oxysterol-binding protein	-0.0150763	13.0487	0.915313	0.959298	-0.109364	-6.62837
Kid. Cortex	Mouse	Ogfod1	Ogfod1	D3YTU2;Q3U0K8	Prolyl 3-hydroxylase OGFOD1	0.248213	10.4456	0.293432	0.530381	1.11575	-5.99881
Kid. Cortex	Mouse	Npnt	Npnt	D3YTX1;Q91V88	Nephronectin	0.941068	13.1325	0.0414348	0.178856	2.37692	-4.25169
Kid. Cortex	Mouse	Snw1	Snw1	A0A0B4J1E2;Q9CSN1	SNW domain-containing protein 1	0.108307	13.0723	0.124808	0.334291	1.69246	-5.28014
Kid. Cortex	Mouse	Josd2	Josd2	D3YTZ7;Q9CR30	ubiquitinyl hydrolase 1;Josephin-2	0.299436	9.75362	0.174434	0.400483	1.47454	-5.57334
Kid. Cortex	Mouse	Plekha1	Plekha1	D3YU01	Pleckstrin homology domain containing, family A (phosphoinositide binding specific) member 1	0.00736654	10.9552	0.964327	0.982334	0.0459845	-6.63374
Kid. Cortex	Mouse	Nmral1	Nmral1	D3YU12;Q8K2T1	NmrA-like family domain containing 1;NmrA-like family domain-containing protein 1	0.223246	12.101	0.0802725	0.260142	1.97053	-4.87784
Kid. Cortex	Mouse	Ncln	Ncln	D3YU17;Q8VCM8	Nicalin;BOS complex subunit NCLN	-0.155434	14.2727	0.146373	0.364631	-1.58966	-5.42124
Kid. Cortex	Mouse	Limch1	Limch1	D3YU22	LIM and calponin homology domains 1	-0.623282	8.87642	0.0629706	0.226056	-2.89062	-3.67137
Kid. Cortex	Mouse	Lemd3	Lemd3	D3YU56;E9QP59;Q9WU40	LEM domain containing 3;LEM domain containing 3;Inner nuclear membrane protein Man1	0.169414	11.7908	0.105905	0.305489	1.79691	-5.13226
Kid. Cortex	Mouse	Anapc7	Anapc7	D3YU58;Q9WVM3	Anaphase promoting complex subunit 7;Anaphase-promoting complex subunit 7	0.0490304	10.6975	0.513702	0.728585	0.679853	-6.38884
Kid. Cortex	Mouse	Enpp6	Enpp6	D3YU63;Q8BGN3	Ectonucleotide pyrophosphatase/phosphodiesterase 6;Glycerophosphocholine cholinephosphodiesterase ENPP6	-0.0598055	12.8099	0.412953	0.643218	-0.858389	-6.24836
Kid. Cortex	Mouse	Cit	Cit	D3YU89;E9QL53;P49025	Citron Rho-interacting kinase	0.236808	10.965	0.202335	0.434728	1.37518	-5.69902
Kid. Cortex	Mouse	Afdn	Afdn	D3YUD2	Afadin, adherens junction formation factor (Fragment)	0.191178	10.5547	0.34599	0.581696	1.00132	-6.06238
Kid. Cortex	Mouse	Ighmbp2	Ighmbp2	A0A0B4J1E3;D3Z5P5;P40694	Immunoglobulin mu binding protein 2;Immunoglobulin mu binding protein 2;DNA-binding protein SMUBP-2	0.034001	9.56123	0.765756	0.883067	0.307097	-6.58366
Kid. Cortex	Mouse	Pcolce	Pcolce	D3YUE2;Q61398	Procollagen C-endopeptidase enhancer protein;Procollagen C-endopeptidase enhancer 1	0.560074	10.5383	0.0288574	0.147505	2.59745	-3.90083
Kid. Cortex	Mouse	Fam151b	Fam151b	D3YUE4	Family with sequence similarity 151, member B	-0.169238	9.99209	0.139164	0.356135	-1.62241	-5.37681
Kid. Cortex	Mouse	Gramd4	Gramd4	D3YUE7;Q8CB44	GRAM domain containing 4;GRAM domain-containing protein 4	0.0867934	10.9557	0.155918	0.377458	1.54846	-5.47643
Kid. Cortex	Mouse	Arhgap20	Arhgap20	D3YUH8;Q6IFT4	Rho GTPase activating protein 20;Rho GTPase-activating protein 20	-0.385922	10.9427	0.0405143	0.176805	-2.39063	-4.23005
Kid. Cortex	Mouse	Ccnyl1	Ccnyl1	D3YUJ3;E9Q226	Cyclin Y-like 1	0.0592161	10.7209	0.745481	0.872765	0.336045	-6.52127
Kid. Cortex	Mouse	Inpp4a	Inpp4a	D3YUL8;D3Z230;E9Q9A0;F6V2U0	phosphatidylinositol-3,4-bisphosphate 4-phosphatase;phosphatidylinositol-3,4-bisphosphate 4-phosphatase;phosphatidylinositol-3,4-bisphosphate 4-phosphatase;phosphatidylinositol-3,4-bisphosphate 4-phosphatase	0.282588	9.79769	0.164372	0.387297	1.5138	-5.52222
Kid. Cortex	Mouse	Ndufv1	Ndufv1	D3YUM1;Q91YT0	NADH dehydrogenase [ubiquinone] flavoprotein 1, mitochondrial;NADH dehydrogenase [ubiquinone] flavoprotein 1, mitochondrial	-0.293771	16.6168	0.00484099	0.0558589	-3.71048	-2.12199
Kid. Cortex	Mouse	Tnni1	Tnni1	D3YUN3;F6QC77;Q9WUZ5	Troponin I, skeletal, slow 1;Troponin I, skeletal, slow 1 (Fragment);Troponin I, slow skeletal muscle	-0.556401	11.1088	0.00638857	0.0649588	-3.53248	-2.40164
Kid. Cortex	Mouse	Vps8	Vps8	D3YUP0;F8WI64;Q0P5W1	VPS8 CORVET complex subunit;VPS8 CORVET complex subunit;Vacuolar protein sorting-associated protein 8 homolog	0.0504477	11.1044	0.377163	0.609056	0.928936	-6.18521
Kid. Cortex	Mouse	Carm1	Carm1	D3YUP1;Q9WVG6	Histone-arginine methyltransferase CARM1	0.0932371	11.7616	0.341208	0.576604	1.00487	-6.11269
Kid. Cortex	Mouse	Gpr39	Gpr39	A0A0B4J1E4;Q5U431	G protein-coupled receptor 39;G-protein coupled receptor 39	0.37099	10.1784	0.109041	0.310788	2.05517	-4.53941
Kid. Cortex	Mouse	Exoc3l2	Exoc3l2	D3YUP5	Exocyst complex component 3-like 2	0.130698	13.0736	0.117603	0.323681	1.73044	-5.22687
Kid. Cortex	Mouse	Adam22	Adam22	D3YUP9;Q9R1V6	A disintegrin and metallopeptidase domain 22;Disintegrin and metalloproteinase domain-containing protein 22	-0.184887	10.3077	0.196541	0.427191	-1.39479	-5.67465
Kid. Cortex	Mouse	Tmem169	Tmem169	D3YUR6;Q8BG50	Transmembrane protein 169 (Fragment);Transmembrane protein 169	0.0595333	10.2799	0.811763	0.909155	0.245251	-6.60216
Kid. Cortex	Mouse	Rasal2	Rasal2	D3YUS5;E9PW37	RAS protein activator like 2	0.055583	10.7228	0.511918	0.727463	0.682808	-6.38675
Kid. Cortex	Mouse	Nrbp1	Nrbp1	D3YUV1;Q99J45	Nuclear receptor binding protein 1;Nuclear receptor-binding protein	0.143206	12.0251	0.23892	0.475794	1.26127	-5.83602
Kid. Cortex	Mouse	Pogz	Pogz	D3YUW8;D3YUX1;Q0VGT3;Q8BZH4	Pogo transposable element with ZNF domain	0.126938	10.603	0.158385	0.380212	1.53818	-5.49008
Kid. Cortex	Mouse	Mpdz	Mpdz	D3YUX2;Q8VBX6	Multiple PDZ domain crumbs cell polarity complex component;Multiple PDZ domain protein	-0.0822973	11.0679	0.286316	0.524505	-1.13344	-5.97979
Kid. Cortex	Mouse	Chst12	Chst12	D3YUY0;Q99LL3	Carbohydrate sulfotransferase 12 (Fragment);Carbohydrate sulfotransferase 12	-0.660064	9.27608	0.120421	0.327556	-1.96812	-4.52986
Kid. Cortex	Mouse	Pip5k1a	Pip5k1a	D3YUY3;F8WI18;P70182	Phosphatidylinositol-4-phosphate 5-kinase, type 1 alpha;Phosphatidylinositol-4-phosphate 5-kinase, type 1 alpha;Phosphatidylinositol 4-phosphate 5-kinase type-1 alpha	-0.169749	10.1065	0.102298	0.29896	-1.81879	-5.10076
Kid. Cortex	Mouse	Dtx3	Dtx3	D3YV13;D3Z4X6;E9Q3J1;Q80V91	E3 ubiquitin-protein ligase;Deltex 3, E3 ubiquitin ligase (Fragment);E3 ubiquitin-protein ligase;Probable E3 ubiquitin-protein ligase DTX3	0.508008	9.32995	0.0196658	0.120446	2.83173	-3.52422
Kid. Cortex	Mouse	Uck2	Uck2	A0A0B4J1E5;Q99PM9	uridine/cytidine kinase (Fragment);Uridine-cytidine kinase 2	0.0812389	11.7143	0.529447	0.74034	0.65403	-6.40675
Kid. Cortex	Mouse	Tnrc18	Tnrc18	D3YV17;Q80WC3	Trinucleotide repeat containing 18;Trinucleotide repeat-containing gene 18 protein	-0.238457	12.9064	0.0712556	0.243438	-2.04439	-4.7668
Kid. Cortex	Mouse	Rab6a	Rab6a	D3YV69	RAB6A, member RAS oncogene family	0.0327317	12.8634	0.695898	0.845241	0.403642	-6.54672
Kid. Cortex	Mouse	Ncald	Ncald	D3YVA2;Q91X97	Neurocalcin delta (Fragment);Neurocalcin-delta	0.118059	12.5407	0.541028	0.750121	0.635328	-6.41933
Kid. Cortex	Mouse	B4galt3	B4galt3	D3YVA5;Q91YY2	UDP-Gal:betaGlcNAc beta 1,4-galactosyltransferase, polypeptide 3 (Fragment);Beta-1,4-galactosyltransferase 3	0.433192	9.91391	0.317147	0.554527	1.0771	-5.90867
Kid. Cortex	Mouse	Slc25a16	Slc25a16	D3YVC9;Q8C0K5	Solute carrier family 25 (mitochondrial carrier, Graves disease autoantigen), member 16 (Fragment);Solute carrier family 25 member 16	-0.106457	13.91	0.289581	0.526855	-1.12528	-5.98859
Kid. Cortex	Mouse	Mov10	Mov10	D3YVL0;D3Z3E8;E9PW39;P23249	RNA helicase;RNA helicase;RNA helicase;Putative helicase MOV-10	0.0503931	12.5448	0.580588	0.774717	0.573135	-6.45874
Kid. Cortex	Mouse	Tmem59	Tmem59	D3YVM2;Q9QY73	Transmembrane protein 59	0.163982	11.2958	0.126043	0.3359	1.68615	-5.28893
Kid. Cortex	Mouse	Bloc1s1	Bloc1s1	D3YVM8;O55102	Biogenesis of lysosome-related organelles complex 1 subunit 1	-0.122833	12.4615	0.130327	0.340923	-1.6647	-5.3187
Kid. Cortex	Mouse	Scube2	Scube2	D3YVM9;Q9JJS0	Signal peptide, CUB domain, EGF-like 2;Signal peptide, CUB and EGF-like domain-containing protein 2	0.173889	9.62463	0.252411	0.490966	1.22293	-5.8803
Kid. Cortex	Mouse	Ipcef1	Ipcef1	D3YVQ1;Q3UX69;Q5DU31	Interaction protein for cytohesin exchange factors 1 (Fragment);Interaction protein for cytohesin exchange factors 1;Interactor protein for cytohesin exchange factors 1	-0.391024	9.74894	0.0637875	0.227359	-2.14986	-4.5512
Kid. Cortex	Mouse	Fcgr2b	Fcgr2b;Fcgr2b;Fcgr2	A0A0B4J1E6;E9Q415;P08101	Fc receptor, IgG, low affinity IIb;Fc receptor, IgG, low affinity IIb;Low affinity immunoglobulin gamma Fc region receptor II	0.0416701	12.0527	0.791316	0.898503	0.272594	-6.59448
Kid. Cortex	Mouse	Cystm1	Cystm1	D3YVS7;Q8K353	Cysteine-rich and transmembrane domain-containing protein 1 (Fragment);Cysteine-rich and transmembrane domain-containing protein 1	-0.703917	13.2964	0.0262595	0.140134	-2.65499	-3.80858
Kid. Cortex	Mouse	Ubash3b	Ubash3b	D3YVT5;Q8BGG7	Ubiquitin associated and SH3 domain containing, B (Fragment);Ubiquitin-associated and SH3 domain-containing protein B	1.22155	7.398	0.00566031	0.0609201	3.93202	-2.03237
Kid. Cortex	Mouse	Usp46	Usp46	D3YVU0;P62069	ubiquitinyl hydrolase 1;Ubiquitin carboxyl-terminal hydrolase 46	-0.0853105	10.9602	0.433273	0.661889	-0.820224	-6.28077
Kid. Cortex	Mouse	Ttc13	Ttc13	D3YVV0;E9Q723;Q3UMK4	Tetratricopeptide repeat domain 13	-0.238292	10.2074	0.136478	0.351274	-1.635	-5.35959
Kid. Cortex	Mouse	Golim4	Golim4	D3YVW2;Q8BXA1	Golgi integral membrane protein 4	0.401396	10.4404	0.00919421	0.0781016	3.30239	-2.76738
Kid. Cortex	Mouse	Smap1	Smap1	D3YVX4;Q91VZ6	Small ArfGAP 1;Stromal membrane-associated protein 1	-0.0371415	11.7496	0.780541	0.892715	-0.287094	-6.59009
Kid. Cortex	Mouse	Ninj1	Ninj1	D3YW25;D6RFN5;O70131	Ninjurin 1;Ninjurin 1;Ninjurin-1	0.724346	11.4712	0.0521428	0.204012	2.23646	-4.47188
Kid. Cortex	Mouse	Ccdc9	Ccdc9	D3YW42;G3X927;Q8VC31	Coiled-coil domain containing 9;Coiled-coil domain-containing protein 9;Coiled-coil domain-containing protein 9	0.400907	10.6815	0.03795	0.171017	2.4305	-4.16694
Kid. Cortex	Mouse	Tsc22d1	Tsc22d1	D3YW86;D3Z0V7;E9QLZ1;P62500	TSC22 domain family, member 1;TSC22 domain family, member 1;TSC22 domain family, member 1;TSC22 domain family protein 1	0.445032	12.5764	0.288372	0.526161	1.12829	-5.98535
Kid. Cortex	Mouse	Arl6ip4	Arl6ip4	D3YWC2;D3Z6F1;Q9JM93	ADP-ribosylation factor-like protein 6-interacting protein 4;ADP-ribosylation factor-like protein 6-interacting protein 4 (Fragment);ADP-ribosylation factor-like protein 6-interacting protein 4	-0.179012	11.1177	0.269199	0.506461	-1.17749	-5.93151
Kid. Cortex	Mouse	Ighv7-4	Ighv7-4	A0A075B5S5;A0A0A6YXL5	Immunoglobulin heavy variable 7-4;Immunoglobulin heavy variable 7-4 (Fragment)		8.65711
Kid. Cortex	Mouse	Kpna4	Kpna4	A0A0B4J1E7;O35343	Karyopherin (importin) alpha 4;Importin subunit alpha-3	-0.0113901	12.4494	0.938812	0.971149	-0.0789349	-6.63149
Kid. Cortex	Mouse	Tm9sf1	Tm9sf1	D3YWH4;D3Z6X7;D6RGM8;Q9DBU0	Transmembrane 9 superfamily member (Fragment);Transmembrane 9 superfamily member;Transmembrane 9 superfamily member;Transmembrane 9 superfamily member 1	0.230829	12.4739	0.16598	0.389549	1.50738	-5.53062
Kid. Cortex	Mouse	Mpv17	Mpv17	D3YWI4;E9Q1I6;F8WHT5;G3UVW1;P19258	MpV17 mitochondrial inner membrane protein;MpV17 mitochondrial inner membrane protein;MpV17 mitochondrial inner membrane protein;MpV17 mitochondrial inner membrane protein;Protein Mpv17	-0.452059	12.6603	0.030079	0.150886	-2.57218	-3.94128
Kid. Cortex	Mouse	Map7	Map7	D3YWN7;E9QMU3	Microtubule-associated protein 7	-0.0884656	12.9401	0.413341	0.643508	-0.857648	-6.249
Kid. Cortex	Mouse	Blnk	Blnk	D3YWR2;Q9QUN3	B cell linker;B-cell linker protein	0.0908344	10.6284	0.502249	0.719266	0.698941	-6.3752
Kid. Cortex	Mouse	1110059G10Rik	1110059G10Rik;	D3YWR8;Q8K039	RIKEN cDNA 1110059G10 gene;Uncharacterized protein KIAA1143 homolog	1.00169	9.50685	0.0222113	0.127682	2.92401	-3.42024
Kid. Cortex	Mouse	Leng8	Leng8	D3YWS8;Q8CBY3	Leukocyte receptor cluster (LRC) member 8;Leukocyte receptor cluster member 8 homolog	0.034805	10.8707	0.760298	0.879621	0.314516	-6.58117
Kid. Cortex	Mouse	Hnrnph3	Hnrnph3	D3YWT1;D3Z3N4	Heterogeneous nuclear ribonucleoprotein H3	0.0241063	13.078	0.852915	0.929877	0.190802	-6.61505
Kid. Cortex	Mouse	Hirip3	Hirip3	D3YWU7;Q8BLH7	HIRA interacting protein 3 (Fragment);HIRA-interacting protein 3		6.36599
Kid. Cortex	Mouse	Ylpm1	Ylpm1	D3YWX2	YLP motif containing 1	0.0765851	11.8447	0.409424	0.639933	0.865149	-6.24249
Kid. Cortex	Mouse	Tmem109	Tmem109	D3YX08;D3Z0I8;D3Z3Z2;D3Z7P2;Q3UBX0	Transmembrane protein 109;Transmembrane protein 109 (Fragment);Transmembrane protein 109 (Fragment);Transmembrane protein 109 (Fragment);Transmembrane protein 109	-0.027572	13.4678	0.875454	0.941992	-0.161255	-6.62071
Kid. Cortex	Mouse	Tchh	Tchh	A0A0B4J1F9	Trichohyalin	0.568999	8.86349	0.158355	0.380212	1.55584	-5.38908
Kid. Cortex	Mouse	Spsb2	Spsb2	D3YX10;D3Z7N7;O88838	SplA/ryanodine receptor domain and SOCS box containing 2 (Fragment);SplA/ryanodine receptor domain and SOCS box containing 2 (Fragment);SPRY domain-containing SOCS box protein 2	0.0822472	9.46366	0.729526	0.863619	0.356713	-6.5659
Kid. Cortex	Mouse	Vsig10	Vsig10	D3YX43;E9PVW4	V-set and immunoglobulin domain-containing protein 10;V-set and immunoglobulin domain containing 10	0.450288	9.75029	0.00806204	0.0722853	3.38501	-2.63556
Kid. Cortex	Mouse	Zfp384	Zfp384	D3YX49;E9Q1A5;E9QAR1;E9QAR4;E9QAR6	Zinc finger protein 384	0.172874	9.49185	0.401972	0.632419	0.879558	-6.22985
Kid. Cortex	Mouse	Orai3	Orai3	D3YX58;D3Z6X8;Q6P8G8	ORAI calcium release-activated calcium modulator 3;ORAI calcium release-activated calcium modulator 3;Protein orai-3	-0.0736502	9.59827	0.464956	0.689458	-0.763061	-6.32692
Kid. Cortex	Mouse	Asap2	Asap2	D3YX85	ArfGAP with SH3 domain, ankyrin repeat and PH domain 2	0.0633488	11.256	0.411856	0.642245	0.860485	-6.24654
Kid. Cortex	Mouse	Slc50a1	Slc50a1	D3YXA7;Q9CXK4	Sugar transporter SWEET1	0.6526	10.0945	0.144424	0.362758	1.59837	-5.40947
Kid. Cortex	Mouse	Spg7	Spg7	D3YXB7;Q3ULF4	SPG7, paraplegin matrix AAA peptidase subunit;Paraplegin	-0.151478	12.873	0.111742	0.31424	-1.76294	-5.18082
Kid. Cortex	Mouse	Ube2e2	Ube2e2	D3YXD1	Ubiquitin-conjugating enzyme E2E 2 (Fragment)	0.324799	11.7324	0.00750323	0.0704504	3.43038	-2.56341
Kid. Cortex	Mouse	Slc39a14	Slc39a14	D3YXD7;D3Z354;D3Z6P5;Q75N73	Solute carrier family 39 (zinc transporter), member 14 (Fragment);Solute carrier family 39 (zinc transporter), member 14 (Fragment);Solute carrier family 39 (zinc transporter), member 14 (Fragment);Metal cation symporter ZIP14	0.475657	10.5886	0.0170936	0.111359	2.99912	-3.28647
Kid. Cortex	Mouse	C7	C7	D3YXF5	Complement component 7	0.478297	10.393	0.0959063	0.288431	1.88672	-4.96417
Kid. Cortex	Mouse	Fcgr2b	Fcgr2b	A0A0B4J1G1	Fc receptor, IgG, low affinity IIb	0.13428	11.8903	0.410233	0.640761	0.863596	-6.24384
Kid. Cortex	Mouse	Gm49948	Gm49948	D3YXH0	Predicted gene, 49948	0.0818235	10.5485	0.785798	0.895116	0.284216	-6.11364
Kid. Cortex	Mouse	Lratd2	Lratd2	D3YXJ5	LRAT domain containing 1	-0.104012	12.6044	0.30883	0.545286	-1.07858	-6.038
Kid. Cortex	Mouse	Samd1	Samd1	D3YXK1	Sterile alpha motif domain-containing protein 1	-0.537246	8.54884	0.375565	0.607624	-0.932195	-6.18219
Kid. Cortex	Mouse	Safb	Safb	D3YXK2;S4R1M2	Scaffold attachment factor B1;Scaffold attachment factor B	0.222449	13.1519	0.0863208	0.271168	1.92529	-4.94507
Kid. Cortex	Mouse	Pmvk	Pmvk	D3YXP6;Q9D1G2	Phosphomevalonate kinase	0.0792632	10.9845	0.775618	0.889632	0.293739	-6.588
Kid. Cortex	Mouse	Hyal1	Hyal1	D3YXU8;Q91ZJ9	Hyaluronidase;Hyaluronidase-1	0.69452	9.95363	0.13777	0.353836	1.85133	-4.66272
Kid. Cortex	Mouse	Zmynd11	Zmynd11	D3YXX1;D3YY86;Q8BJZ0;Q8R5C8	Zinc finger, MYND domain containing 11;Zinc finger, MYND domain containing 11;Zinc finger, MYND domain containing 11;Zinc finger MYND domain-containing protein 11	-0.177397	11.0961	0.216546	0.450929	-1.32902	-5.75549
Kid. Cortex	Mouse	Mpv17l	Mpv17l	D3YXY8;D3Z6M3;E9Q4P9;Q99MS3	Mpv17 transgene, kidney disease mutant-like (Fragment);Mpv17 transgene, kidney disease mutant-like;Mpv17 transgene, kidney disease mutant-like;Mpv17-like protein	-0.0248403	11.6238	0.95531	0.978512	-0.0576205	-6.63308
Kid. Cortex	Mouse	Klc2	Klc2	D3YXZ3;Q91YS4	Kinesin light chain	0.0346308	12.3794	0.629213	0.805045	0.499789	-6.50036
Kid. Cortex	Mouse	Drap1	Drap1	D3YY09;F6T9K1;Q9D6N5	Dr1 associated protein 1 (negative cofactor 2 alpha);Dr1 associated protein 1 (negative cofactor 2 alpha);Dr1-associated corepressor	0.0596548	11.9615	0.484598	0.706332	0.728898	-6.35311
Kid. Cortex	Mouse	Elf2	Elf2	A0A0B4J1G5	E74-like factor 2	-0.0138487	9.21839	0.935656	0.968956	-0.0833046	-6.57933
Kid. Cortex	Mouse	Inhca	Inhca;Ica	D3YY36;Q9DBD0	Inhibitor of carbonic anhydrase	1.61867	10.9786	5.97007e-05	0.00702479	7.0522	2.29745
Kid. Cortex	Mouse	Pik3ca	Pik3ca	D3YY41;P42337	Phosphatidylinositol-4,5-bisphosphate 3-kinase catalytic subunit alpha;Phosphatidylinositol 4,5-bisphosphate 3-kinase catalytic subunit alpha isoform	0.108462	11.0784	0.145993	0.364396	1.59135	-5.41896
Kid. Cortex	Mouse	Cutc	Cutc	D3YY50;F8WHX2;Q9D8X1	Copper homeostasis protein cutC homolog (Fragment);Copper homeostasis protein cutC homolog;Copper homeostasis protein cutC homolog	0.12953	12.7027	0.147866	0.367295	1.58306	-5.43013
Kid. Cortex	Mouse	Sap18	Sap18;Sap18;Sap18b;Sap18	D3YY73;D3Z2N9;E9Q317;O55128	Sin3-associated polypeptide 18;Sin3-associated polypeptide 18;Histone deacetylase complex subunit SAP18;Histone deacetylase complex subunit SAP18	0.316219	10.1923	0.39821	0.629839	0.892429	-6.16448
Kid. Cortex	Mouse	Setdb1	Setdb1	D3YYC3;G5E8N3;O88974	SET domain, bifurcated 1;SET domain, bifurcated 1;Histone-lysine N-methyltransferase SETDB1	-0.0611989	10.0402	0.756139	0.876948	-0.320181	-6.57923
Kid. Cortex	Mouse	Olfm4	Olfm4	D3YYD0;Q3UZZ4	Olfactomedin 4;Olfactomedin-4		10.4684
Kid. Cortex	Mouse	Eef2kmt	Eef2kmt	D3YYE2;Q3UZW7	Eukaryotic elongation factor 2 lysine methyltransferase (Fragment);Protein-lysine N-methyltransferase EEF2KMT	-0.0710399	9.03471	0.729988	0.863858	-0.356076	-6.56614
Kid. Cortex	Mouse	Plaat3	Plaat3	D3YYG1;Q8R3U1	Phospholipase A and acyltransferase 3 (Fragment);Phospholipase A and acyltransferase 3	0.0454825	9.82674	0.854838	0.930713	0.188274	-6.61557
Kid. Cortex	Mouse	Polr2i	Polr2i	D3YYI3;D3Z3Z8;P60898	DNA-directed RNA polymerase subunit;Polymerase (RNA) II (DNA directed) polypeptide I (Fragment);DNA-directed RNA polymerase II subunit RPB9	-0.0655394	11.3264	0.578875	0.77419	-0.575778	-6.45714
Kid. Cortex	Mouse	Fcrl2	Fcrl2	D3YYJ5;Q9EQY5	Fc receptor-like S, scavenger receptor (Fragment);Fc receptor-like S, scavenger receptor		8.86997
Kid. Cortex	Mouse	Igkv2-137	Igkv2-137;	A0A0B4J1H6;P01630	Immunoglobulin kappa chain variable 2-137 (Fragment);Ig kappa chain V-II region 7S34.1	1.01423	10.0509	0.242514	0.48019	1.32491	-5.28384
Kid. Cortex	Mouse	Bud23	Bud23	D3YYK7;Q9CY21	BUD23, rRNA methyltransferase and ribosome maturation factor;Probable 18S rRNA (guanine-N(7))-methyltransferase	0.188379	10.9221	0.0198736	0.120868	2.82529	-3.53459
Kid. Cortex	Mouse	Mapre2	Mapre2	D3YYK8;E9Q6X0	Microtubule-associated protein, RP/EB family, member 2 (Fragment);Microtubule-associated protein, RP/EB family, member 2	-0.164154	13.6571	0.0455494	0.188999	-2.31913	-4.34267
Kid. Cortex	Mouse	Rps5	Rps5	D3YYM6;D3Z1S8;P97461	Ribosomal protein S5 (Fragment);Ribosomal protein S5 (Fragment);40S ribosomal protein S5	-0.098851	12.9077	0.436341	0.664429	-0.81457	-6.28546
Kid. Cortex	Mouse	Ahcyl2	Ahcyl2	D3YYM7;H3BL31	S-adenosylhomocysteine hydrolase-like 2 (Fragment)	-0.725998	11.1267	0.0357549	0.166153	-2.52094	-3.99137
Kid. Cortex	Mouse	Atp1a2	Atp1a2	D3YYN7;Q6PIE5	Sodium/potassium-transporting ATPase subunit alpha;Sodium/potassium-transporting ATPase subunit alpha-2	-0.325995	17.231	0.00887107	0.0765853	-3.32484	-2.73151
Kid. Cortex	Mouse	Gsdme	Gsdme	D3YYP5;E9Q5V3;Q9Z2D3	Gasdermin E;Gasdermin E;Gasdermin-E	-0.0750952	11.1004	0.315883	0.55313	-1.06204	-6.05513
Kid. Cortex	Mouse	Mgll	Mgll	D3YYS6;E9Q3B9;O35678	Monoglyceride lipase	-0.48985	11.9679	0.0726546	0.245731	-2.03237	-4.78498
Kid. Cortex	Mouse	Cdh2	Cdh2	D3YYT0;P15116	Cadherin 2;Cadherin-2	-0.438735	12.3997	0.00165666	0.031233	-4.42595	-1.0366
Kid. Cortex	Mouse	Glyr1	Glyr1	D3YYT1;Q922P9	Cytokine-like nuclear factor N-PAC	0.0600083	13.0111	0.4524	0.678814	0.785395	-6.30923
Kid. Cortex	Mouse	Tssc4	Tssc4	D3YYU6;D3YZR1;D3Z6S3;Q9JHE7	Protein TSSC4 (Fragment);Protein TSSC4 (Fragment);Protein TSSC4 (Fragment);Protein TSSC4	-0.0856869	11.907	0.446286	0.672925	-0.796419	-6.30034
Kid. Cortex	Mouse	Igkv1-135	Igkv1-135;Igkv1-133	A0A0B4J1H7;A0A0B4J1H8	Immunoglobulin kappa variable 1-135 (Fragment);Immunoglobulin kappa variable 1-133 (Fragment)	0.90806	10.3744	0.130213	0.340762	1.66527	-5.31792
Kid. Cortex	Mouse	Rbm42	Rbm42	D3YYW8;Q91V81	RNA-binding protein 42	-0.14059	10.6144	0.339009	0.574643	-1.00971	-6.10792
Kid. Cortex	Mouse	Midn	Midn	D3YYX7;Q3TPJ7	Midnolin (Fragment);Midnolin	0.329089	8.78245	0.0711104	0.243339	2.08003	-4.68317
Kid. Cortex	Mouse	Fam241b	Fam241b	D3YYX8;D3Z2E9;D3Z7G3;Q9D882	Family with sequence similarity 241, member B (Fragment);Family with sequence similarity 241, member B (Fragment);Family with sequence similarity 241, member B (Fragment);Protein FAM241B	0.221913	9.61714	0.1316	0.342886	1.65845	-5.32733
Kid. Cortex	Mouse	Terf2	Terf2	D3YZ08;E9QM06;O35144	Telomeric repeat-binding factor;Telomeric repeat binding factor 2;Telomeric repeat-binding factor 2	0.0140558	11.1199	0.876746	0.942615	0.159566	-6.62101
Kid. Cortex	Mouse	Gar1	Gar1	D3YZ09;Q9CY66	H/ACA ribonucleoprotein complex subunit (Fragment);H/ACA ribonucleoprotein complex subunit 1	0.231781	13.454	0.0404008	0.17639	2.39234	-4.22735
Kid. Cortex	Mouse	Polr2j	Polr2j	D3YZ20;O08740;Q6PI63	Polymerase (RNA) II (DNA directed) polypeptide J;DNA-directed RNA polymerase II subunit RPB11;Polymerase (RNA) II (DNA directed) polypeptide J	0.603401	9.848	0.023756	0.131639	3.20886	-3.16422
Kid. Cortex	Mouse	Hacl1	Hacl1	D3YZ54;Q9QXE0	2-hydroxyacyl-CoA lyase 1	-0.162235	14.1656	0.648953	0.816912	-0.470846	-6.51531
Kid. Cortex	Mouse	Fyn	Fyn	D3YZ57;P39688	Tyrosine-protein kinase;Tyrosine-protein kinase Fyn	-0.278131	10.4439	0.200051	0.43143	-1.38285	-5.68951
Kid. Cortex	Mouse	Rex1bd	Rex1bd	D3YZ60;Q9CYZ6	Required for excision 1-B domain containing;Required for excision 1-B domain-containing protein	0.0105857	10.8337	0.934207	0.96866	0.0848907	-6.63096
Kid. Cortex	Mouse	Myo5a	Myo5a	D3YZ62;D3Z4J3;Q99104	Myosin VA;Myosin VA;Unconventional myosin-Va	0.0211044	12.3259	0.892141	0.948743	0.139481	-6.62428
Kid. Cortex	Mouse	Igkv1-110	Igkv1-110	A0A0B4J1I0	Immunoglobulin kappa variable 1-110 (Fragment)	0.915436	10.9464	0.0171607	0.111601	2.91534	-3.38946
Kid. Cortex	Mouse	Ntan1	Ntan1	D3YZ99;Q64311	N-terminal Asn amidase;Protein N-terminal asparagine amidohydrolase	2.13464	9.95563	0.108357	0.309576	1.80717	-5.07697
Kid. Cortex	Mouse	Cfap298	Cfap298	D3YZC4;Q8BL95	Cilia and flagella associate protien 298 (Fragment);Cilia- and flagella-associated protein 298	-0.265604	10.7543	0.260687	0.498495	-1.20023	-5.90605
Kid. Cortex	Mouse	Brd8	Brd8	D3YZC7;Q8R3B7	Bromodomain containing 8;Bromodomain-containing protein 8	0.225569	10.5186	0.0348855	0.163952	2.48183	-4.08543
Kid. Cortex	Mouse	Sf1	Sf1	D3YZC9;D3YZD0;Q64213	Splicing factor 1	0.0871168	12.8045	0.195746	0.426411	1.39752	-5.67124
Kid. Cortex	Mouse	Aamdc	Aamdc	D3YZD8;D3Z442;Q8R0P4	Adipogenesis associated Mth938 domain containing;Adipogenesis associated Mth938 domain containing;Mth938 domain-containing protein	-0.190853	13.6104	0.0406435	0.177125	-2.38869	-4.23312
Kid. Cortex	Mouse	Edrf1	Edrf1	D3YZE7;E9Q9F9;Q6GQV7	Erythroid differentiation regulatory factor 1;Erythroid differentiation regulatory factor 1;Erythroid differentiation-related factor 1	-0.0134978	9.588	0.940421	0.971638	-0.0768539	-6.63167
Kid. Cortex	Mouse	Mthfd2l	Mthfd2l	D3YZG8	Bifunctional methylenetetrahydrofolate dehydrogenase/cyclohydrolase 2, mitochondrial	-0.0282646	9.62227	0.88049	0.944194	-0.154675	-6.62185
Kid. Cortex	Mouse	Ccdc6	Ccdc6	D3YZP9	Coiled-coil domain-containing protein 6	0.0132357	12.7447	0.917658	0.960672	0.106323	-6.62873
Kid. Cortex	Mouse	Ramac	Ramac	D3YZS0;Q9CQY2	RNA guanine-7 methyltransferase activating subunit (Fragment);RNA guanine-N7 methyltransferase activating subunit	0.772067	8.80131	0.447726	0.674029	0.793814	-6.30245
Kid. Cortex	Mouse	Tarbp2	Tarbp2	D3YZS5;D3Z282;P97473	TARBP2, RISC loading complex RNA binding subunit (Fragment);TARBP2, RISC loading complex RNA binding subunit (Fragment);RISC-loading complex subunit TARBP2	-0.152268	11.2353	0.111901	0.314425	-1.76204	-5.18211
Kid. Cortex	Mouse	Igkv4-68	Igkv4-68	A0A0B4J1I7	Immunoglobulin kappa variable 4-68 (Fragment)	0.859128	9.43597	0.0111108	0.0869433	5.62436	-2.06423
Kid. Cortex	Mouse	Tmprss11g	Tmprss11g	D3YZU3;Q8BZ10	Transmembrane protease serine;Transmembrane protease serine 11G	-0.345981	9.74815	0.172599	0.398122	-1.54795	-5.2478
Kid. Cortex	Mouse	Haghl	Haghl	D3YZU6;Q9DB32	Hydroxyacylglutathione hydrolase-like;Hydroxyacylglutathione hydrolase-like protein	0.259638	8.92426	0.666451	0.827125	0.445544	-6.52768
Kid. Cortex	Mouse	Srgap1	Srgap1	D3YZW1;Q91Z69	SLIT-ROBO Rho GTPase activating protein 1;SLIT-ROBO Rho GTPase-activating protein 1	0.380618	10.0232	0.0264907	0.140894	2.64964	-3.81716
Kid. Cortex	Mouse	Srp9	Srp9	D3YZX8;P49962	Signal recognition particle 9;Signal recognition particle 9 kDa protein	0.0850721	12.1399	0.47954	0.701643	0.737608	-6.34653
Kid. Cortex	Mouse	Vgll4	Vgll4	D3YZY3;D3Z130;Q80V24	Vestigial like family member 4 (Fragment);Vestigial like family member 4 (Fragment);Transcription cofactor vestigial-like protein 4	0.40882	8.7961	0.22424	0.459	1.52678	-4.98495
Kid. Cortex	Mouse	Tmed7	Tmed7	D3YZZ5	Transmembrane p24 trafficking protein 7	-0.00316747	12.9664	0.981965	0.991431	-0.0232415	-6.6346
Kid. Cortex	Mouse	Carmil1	Carmil1	D3Z030;Q6EDY6	Capping protein regulator and myosin 1 linker 1;F-actin-uncapping protein LRRC16A	0.10314	12.3243	0.182672	0.411055	1.44385	-5.61274
Kid. Cortex	Mouse	Acsl1	Acsl1	D3Z041;P41216	Long-chain-fatty-acid--CoA ligase;Long-chain-fatty-acid--CoA ligase 1	-0.605062	15.3809	0.0411998	0.178407	-2.3804	-4.24622
Kid. Cortex	Mouse	Phldb2	Phldb2	D3Z069	Pleckstrin homology like domain, family B, member 2 (Fragment)	0.313726	10.0498	0.348547	0.583012	0.988907	-6.12832
Kid. Cortex	Mouse	Diaph1	Diaph1	D3Z074;F6XC54	Diaphanous related formin 1	0.92054	11.4925	0.0790615	0.257972	2.11281	-4.5103
Kid. Cortex	Mouse	Igkv5-43	Igkv5-43	A0A0B4J1J2	Immunoglobulin kappa chain variable 5-43 (Fragment)	1.28447	9.89784	0.000239021	0.0133223	6.2753	1.02393
Kid. Cortex	Mouse	Stxbp5	Stxbp5	D3Z079;D3Z2Q2;Q8K400	Syntaxin binding protein 5 (tomosyn);Syntaxin binding protein 5 (tomosyn);Syntaxin-binding protein 5	0.0062149	11.2582	0.922765	0.962766	0.099704	-6.62947
Kid. Cortex	Mouse	Sorbs2	Sorbs2	D3Z080	Sorbin and SH3 domain containing 2	0.504893	14.3086	0.00088398	0.0235462	4.86952	-0.400174
Kid. Cortex	Mouse	Eef2k	Eef2k	D3Z088;O08796	Eukaryotic elongation factor-2 kinase (Fragment);Eukaryotic elongation factor 2 kinase	-0.157179	9.00317	0.337037	0.57283	-1.01406	-6.10361
Kid. Cortex	Mouse	Csf1	Csf1	D3Z090;P07141	Colony stimulating factor 1 (macrophage) (Fragment);Macrophage colony-stimulating factor 1	1.5586	6.64236	0.0230357	0.130017	2.89844	-3.45692
Kid. Cortex	Mouse	Tmbim1	Tmbim1	D3Z0A5;D3Z225;Q3U717;Q8BJZ3	Transmembrane BAX inhibitor motif containing 1 (Fragment);Transmembrane BAX inhibitor motif containing 1 (Fragment);Transmembrane BAX inhibitor motif containing 1;Protein lifeguard 3	0.750167	8.89174	0.00128401	0.0276673	4.60347	-0.77833
Kid. Cortex	Mouse	Rrm2	Rrm2	D3Z0D8;P11157	Ribonucleotide reductase M2 (Fragment);Ribonucleoside-diphosphate reductase subunit M2	1.01534	10.0775	0.000429719	0.0164484	5.4057	0.328791
Kid. Cortex	Mouse	Cops6	Cops6	D3Z0F5;O88545	COP9 signalosome complex subunit 6	-0.0505273	13.9754	0.503428	0.72012	-0.696964	-6.37662
Kid. Cortex	Mouse	Rgs12	Rgs12	D3Z0G5;D3Z0G6;D3Z0G7;E9Q1K7;E9Q652;F7B2U5;Q3TTW9;Q8CGE9	Regulator of G-protein signaling 12;Regulator of G-protein signaling 12;Regulator of G-protein signaling 12;Regulator of G-protein signaling 12;Regulator of G-protein signaling 12;Regulator of G-protein signaling 12 (Fragment);Regulator of G-protein signaling 12;Regulator of G-protein signaling 12	0.0712958	9.03613	0.764297	0.881903	0.342989	-5.83791
Kid. Cortex	Mouse	Rsbn1l	Rsbn1l	D3Z0K6	Round spermatid basic protein 1-like	1.8883	8.13435	0.0618798	0.224222	2.13139	-4.63423
Kid. Cortex	Mouse	Gnb1l	Gnb1l	D3Z0M5;Q3TM20;Q9EQ15	Guanine nucleotide binding protein (G protein), beta polypeptide 1-like (Fragment);Guanine nucleotide binding protein (G protein), beta polypeptide 1-like;Guanine nucleotide-binding protein subunit beta-like protein 1	-0.175756	9.19477	0.336622	0.572705	-1.02215	-6.04181
Kid. Cortex	Mouse	Eef1akmt1	Eef1akmt1	A0A0D2X7Z2;Q9CY45	EEF1A lysine methyltransferase 1	1.53701	10.4468	0.0500533	0.199023	2.26149	-4.43289
Kid. Cortex	Mouse	Dync1i1	Dync1i1	D3Z0M6;O88485;Q3TYJ3	Dynein cytoplasmic 1 intermediate chain 1;Cytoplasmic dynein 1 intermediate chain 1;Dynein cytoplasmic 1 intermediate chain 1	-0.181629	8.18647	0.289346	0.526703	-1.12587	-5.98796
Kid. Cortex	Mouse	Ddx23	Ddx23	D3Z0M9	RNA helicase	0.0522322	13.0827	0.528769	0.739935	0.655133	-6.406
Kid. Cortex	Mouse	Zbbx	Zbbx	D3Z0P6;F8WIV1;Q0P5X5	Zinc finger, B-box domain containing;Zinc finger, B-box domain containing;Zinc finger B-box domain-containing protein 1		6.30567
Kid. Cortex	Mouse	Mthfsd	Mthfsd	D3Z0Q4;D3Z4L1	Methenyltetrahydrofolate synthetase domain containing	-2.87648	11.6692	0.208628	0.442268	-1.38484	-5.56293
Kid. Cortex	Mouse	Taf6	Taf6	D3Z0T0;Q62311	TATA-box binding protein associated factor 6;Transcription initiation factor TFIID subunit 6	-0.0539225	10.8849	0.590431	0.780109	-0.558032	-6.46775
Kid. Cortex	Mouse	Cnpy4	Cnpy4	D3Z0T5;Q8BQ47	Canopy FGF signaling regulator 4 (Fragment);Protein canopy homolog 4	0.00160434	10.5476	0.99589	0.998299	0.00529626	-6.63488
Kid. Cortex	Mouse	Chrac1	Chrac1	D3Z0U4;Q9JKP8	Chromatin accessibility complex 1;Chromatin accessibility complex protein 1	0.167594	11.5135	0.12155	0.329586	1.70938	-5.25649
Kid. Cortex	Mouse	Prkar1b	Prkar1b	D3Z0V6;P12849	Protein kinase, cAMP dependent regulatory, type I beta;cAMP-dependent protein kinase type I-beta regulatory subunit	0.153079	9.70453	0.397539	0.629498	0.888217	-6.22217
Kid. Cortex	Mouse	Phldb1	Phldb1	D3Z0X5;D3Z4N0;E9PWB1;Q6PDH0	Pleckstrin homology like domain, family B, member 1;Pleckstrin homology like domain, family B, member 1;Pleckstrin homology like domain, family B, member 1;Pleckstrin homology-like domain family B member 1	0.188631	12.1494	0.0570913	0.214059	2.18088	-4.55805
Kid. Cortex	Mouse	Elovl5	Elovl5	D3Z0Z6;D3Z136;Q8BHI7	Elongation of very long chain fatty acids protein (Fragment);Elongation of very long chain fatty acids protein (Fragment);Elongation of very long chain fatty acids protein 5	0.0733181	7.95225	0.822136	0.914114	0.231457	-6.60572
Kid. Cortex	Mouse	Amot	Amot	A0A067XG49;F6QYS7;F6YMV1;Q8VHG2	Angiomotin;Angiomotin (Fragment);Angiomotin (Fragment);Angiomotin	0.0726191	10.0343	0.635791	0.809012	0.490096	-6.50546
Kid. Cortex	Mouse	Ighv1-4	Ighv1-4;Ighv1-7	A0A075B5T4;A0A075B5T7	Immunoglobulin heavy variable 1-4 (Fragment);Immunoglobulin heavy variable V1-7 (Fragment)	0.777496	9.65289	0.0453268	0.18836	2.51931	-4.00748
Kid. Cortex	Mouse	Adgre5	Adgre5	A0A0D9SEG8;E9QJS7;E9QMJ5;Q9DC42;Q9Z0M6	Adhesion G protein-coupled receptor E5	1.90961	10.3599	0.0658115	0.232095	2.09346	-4.69226
Kid. Cortex	Mouse	Asxl2	Asxl2	D3Z112;D6REV1;D6RI62;F6WV21;Q8BZ32	ASXL transcriptional regulator 2;ASXL transcriptional regulator 2;ASXL transcriptional regulator 2 (Fragment);ASXL transcriptional regulator 2;Putative Polycomb group protein ASXL2	-0.064936	9.51705	0.67149	0.829717	-0.438314	-6.53109
Kid. Cortex	Mouse	Ica1	Ica1	D3Z118;P97411	Islet cell autoantigen 1	-0.027286	9.85393	0.846089	0.926255	-0.199786	-6.61314
Kid. Cortex	Mouse	Thoc6	Thoc6	D3Z132;Q5U4D9	THO complex 6;THO complex subunit 6 homolog	0.135261	11.1651	0.0925396	0.28194	1.88179	-5.00911
Kid. Cortex	Mouse	Esrp2	Esrp2	D3Z139;Q8K0G8	Epithelial splicing regulatory protein 2 (Fragment);Epithelial splicing regulatory protein 2	-0.0621587	11.7674	0.599451	0.786641	-0.54431	-6.47573
Kid. Cortex	Mouse	Cops9	Cops9	D3Z159;Q3U898	COP9 signalosome complex subunit 9	-0.349353	10.3592	0.155778	0.377218	-1.54905	-5.47565
Kid. Cortex	Mouse	Mfsd6	Mfsd6	D3Z183	Major facilitator superfamily domain containing 6	0.437223	9.77735	0.13727	0.352741	1.63126	-5.3647
Kid. Cortex	Mouse	Nsd3	Nsd3	D3Z197;D3Z357;Q6P2L6	Nuclear receptor binding SET domain protein 3;Nuclear receptor binding SET domain protein 3;Histone-lysine N-methyltransferase NSD3	0.158735	11.054	0.140792	0.358169	1.61488	-5.38706
Kid. Cortex	Mouse	Ldb1	Ldb1	D3Z1C5;P70662	LIM domain binding 1;LIM domain-binding protein 1	-0.275988	10.0673	0.211387	0.445343	-1.34547	-5.73551
Kid. Cortex	Mouse	Mospd3	Mospd3	D3Z1F3;Q8BGG6	Motile sperm domain containing 3 (Fragment);Motile sperm domain-containing protein 3	-1.93922	8.82094	0.0114903	0.0888916	-5.55703	-2.09079
Kid. Cortex	Mouse	Gltp	Gltp	D3Z1H9;Q9JL62	Glycolipid transfer protein	0.23879	13.0645	0.0248597	0.135859	2.68842	-3.75489
Kid. Cortex	Mouse	Ldah	Ldah	A0A0F6AIX5	Lipid droplet-associated hydrolase	0.0134318	12.4385	0.877712	0.94273	0.158305	-6.62123
Kid. Cortex	Mouse	Palld	Palld	D3Z1J5	Palladin, cytoskeletal associated protein (Fragment)	0.198027	11.2637	0.126296	0.3359	1.68487	-5.29072
Kid. Cortex	Mouse	Pbrm1	Pbrm1	D3Z1N4;D3Z1W6;E9Q4Y5;E9Q7L2;E9Q7L3;F8VQD1;Q8BSQ9	Polybromo 1;Polybromo 1;Polybromo 1;Polybromo 1;Polybromo 1;Polybromo 1;Protein polybromo-1	0.215176	11.4646	0.0402308	0.176112	2.39491	-4.22328
Kid. Cortex	Mouse	Slc8b1	Slc8b1	D3Z226;Q925Q3	Solute carrier family 8 (sodium/lithium/calcium exchanger), member B1;Mitochondrial sodium/calcium exchanger protein	1.43797	7.54641	0.0163309	0.108543	3.30369	-2.96974
Kid. Cortex	Mouse	Tmppe	Tmppe	D3Z286	Transmembrane protein with metallophosphoesterase domain	0.134157	11.8197	0.116042	0.320952	1.73894	-5.21486
Kid. Cortex	Mouse	Xpr1	Xpr1	D3Z2B4;Q9Z0U0	Xenotropic and polytropic retrovirus receptor 1	-0.0408342	10.8502	0.586762	0.778689	-0.563645	-6.46443
Kid. Cortex	Mouse	Reps1	Reps1	D3Z2E3;E9Q632;F6R6F1;O54916	RalBP1 associated Eps domain containing protein;RalBP1 associated Eps domain containing protein;RalBP1 associated Eps domain containing protein (Fragment);RalBP1-associated Eps domain-containing protein 1	0.118283	12.17	0.3584	0.592175	0.967862	-6.14861
Kid. Cortex	Mouse	Ifi207	Ifi207	D3Z2E7;E9Q3L4	Interferon activated gene 207		10.1446
Kid. Cortex	Mouse	Calhm2	Calhm2	D3Z2E8;Q8VEC4	Calcium homeostasis modulator family member 2;Calcium homeostasis modulator protein 2	0.830351	9.30671	0.0417257	0.1793	2.58073	-3.87827
Kid. Cortex	Mouse	Tmx2	Tmx2	D3Z2J6;Q9D710	Thioredoxin-related transmembrane protein 2	-0.159711	13.4238	0.204566	0.43804	-1.36775	-5.70819
Kid. Cortex	Mouse	Mrps14	Mrps14	D3Z2K2;Q9CR88	Mitochondrial ribosomal protein S14;28S ribosomal protein S14, mitochondrial	-0.150874	11.8374	0.30965	0.546128	-1.07664	-6.04002
Kid. Cortex	Mouse	Adgrl2	Adgrl2	A0A0G2JDE3;A0A0G2JFV3;A0A0G2JG66	Adhesion G protein-coupled receptor L2	-0.0309217	11.4128	0.735683	0.867072	-0.348217	-6.56912
Kid. Cortex	Mouse	Gnao1	Gnao1	D3Z2M7;P18872	Guanine nucleotide binding protein, alpha O (Fragment);Guanine nucleotide-binding protein G(o) subunit alpha	0.262686	11.0463	0.141863	0.359503	1.60997	-5.39373
Kid. Cortex	Mouse	Cdk1	Cdk1	D3Z2T9;P11440	Cyclin-dependent kinase 1 (Fragment);Cyclin-dependent kinase 1	1.02053	10.7553	0.00103132	0.0246972	4.75876	-0.55629
Kid. Cortex	Mouse	Rpap2	Rpap2	D3Z2V7;Q8VC34	RNA polymerase II associated protein 2 (Fragment);Putative RNA polymerase II subunit B1 CTD phosphatase Rpap2	-0.239515	9.72942	0.184717	0.413952	-1.43642	-5.6222
Kid. Cortex	Mouse	Tnip1	Tnip1	D3Z2W0;E9QM75;Q9WUU8	TNFAIP3 interacting protein 1;TNFAIP3 interacting protein 1;TNFAIP3-interacting protein 1	0.219671	9.75566	0.267888	0.505548	1.18095	-5.92765
Kid. Cortex	Mouse	Clip1	Clip1	D3Z2Z1	CAP-GLY domain containing linker protein 1		9.41724
Kid. Cortex	Mouse	Tnfaip8	Tnfaip8	D3Z325;Q921Z5	Tumor necrosis factor, alpha-induced protein 8;Tumor necrosis factor alpha-induced protein 8	0.00985426	13.4977	0.913379	0.958608	0.111873	-6.62806
Kid. Cortex	Mouse	Borcs8	Borcs8	D3Z373;Q9D6Y4	BLOC-1 related complex subunit 8;BLOC-1-related complex subunit 8	-0.267683	10.6038	0.494573	0.712707	-0.711886	-6.36575
Kid. Cortex	Mouse	Rnf7	Rnf7	D3Z392;Q9WTZ1	Ring finger protein 7;RING-box protein 2	-0.0648114	10.0613	0.482514	0.704371	-0.732479	-6.35041
Kid. Cortex	Mouse	Myo9a	Myo9a	D3Z3A8	Myosin IXa	0.119887	10.1756	0.546203	0.753259	0.627047	-6.42479
Kid. Cortex	Mouse	Nrf1	Nrf1	D3Z3B4;E9Q7X0;G3XA39;Q3UXF4;Q9WU00	Nuclear respiratory factor 1	0.0615741	12.0412	0.600268	0.787278	0.543074	-6.47644
Kid. Cortex	Mouse	Slc35a3	Slc35a3	A0A0G2JDH8;D3YXZ7;Q8R1T4	Solute carrier family 35 (UDP-N-acetylglucosamine (UDP-GlcNAc) transporter), member 3 (Fragment);Solute carrier family 35 (UDP-N-acetylglucosamine (UDP-GlcNAc) transporter), member 3 (Fragment);UDP-N-acetylglucosamine transporter	0.423976	10.3029	0.453625	0.679688	0.783199	-6.31099
Kid. Cortex	Mouse	Shroom1	Shroom1	D3Z3D5;Q5SX79	Shroom family member 1;Protein Shroom1	-0.942482	8.50211	0.139188	0.356135	-2.00092	-4.49637
Kid. Cortex	Mouse	Nit1	Nit1	D3Z3I3	Nitrilase 1 (Fragment)	-0.0928436	9.02565	0.698009	0.846621	-0.427242	-5.94073
Kid. Cortex	Mouse	Tmem219	Tmem219	D3Z3J3;G3X9Z3;G5E8V1;Q9D123	Transmembrane protein 219 (Fragment);Transmembrane protein 219;Transmembrane protein 219;Insulin-like growth factor-binding protein 3 receptor	-0.359657	9.16373	0.436623	0.664556	-0.833222	-6.06927
Kid. Cortex	Mouse	Paip1	Paip1	D3Z3J6	Polyadenylate binding protein-interacting protein 1	0.0492562	10.7741	0.876062	0.942409	0.160461	-6.62085
Kid. Cortex	Mouse	Trim12c	Trim12c	D3Z3L3	Tripartite motif-containing 12C	0.355773	10.5772	0.0708935	0.24314	2.04754	-4.76204
Kid. Cortex	Mouse	Ino80c	Ino80c	D3Z3N1;Q8BHA0	INO80 complex subunit C	-0.232579	10.376	0.395532	0.62772	-0.892162	-6.21865
Kid. Cortex	Mouse	Smtn	Smtn	D3Z3Q3;Q921U8	Smoothelin	0.420674	12.1158	0.0174926	0.112327	2.90357	-3.40843
Kid. Cortex	Mouse	St3gal2	St3gal2	D3Z3V2;Q11204	ST3 beta-galactoside alpha-2,3-sialyltransferase 2;CMP-N-acetylneuraminate-beta-galactosamide-alpha-2,3-sialyltransferase 2	0.236441	10.2503	0.490793	0.710621	0.718306	-6.36101
Kid. Cortex	Mouse	Pigg	Pigg	D3Z3Y1;D3Z4I0	GPI ethanolamine phosphate transferase 2	-0.0133534	11.3969	0.833188	0.920495	-0.216814	-6.60929
Kid. Cortex	Mouse	Smim24	Smim24	D3Z3Y2;Q0VG18	Small integral membrane protein 24	-0.394411	10.6428	0.315702	0.552928	-1.06246	-6.05469
Kid. Cortex	Mouse	Fbrsl1	Fbrsl1	A0A0G2JDI2;A0A0G2JFF2;E9PUB6;E9Q9T0	Fibrosin-like 1	-0.00768159	7.64707	0.995786	0.998299	-0.00544924	-6.58314
Kid. Cortex	Mouse	Ssbp1	Ssbp1	D3Z3Y3	Single-stranded DNA-binding protein, mitochondrial (Fragment)	-0.0676244	10.9959	0.74711	0.873745	-0.332521	-6.57488
Kid. Cortex	Mouse	Sh2b3	Sh2b3	D3Z3Y5;O09039	SH2B adaptor protein 3;SH2B adapter protein 3	0.465907	8.45891	0.25161	0.490025	1.23573	-5.81313
Kid. Cortex	Mouse	Farp2	Farp2	D3Z4C0	FERM, RhoGEF and pleckstrin domain protein 2	-0.294503	9.52468	0.0500494	0.199023	-2.26154	-4.43281
Kid. Cortex	Mouse	Uqcc2	Uqcc2	D3Z4C9;Q9CQY6	Ubiquinol-cytochrome-c reductase complex assembly factor 2	0.160196	11.8387	0.468735	0.692612	0.756417	-6.3321
Kid. Cortex	Mouse	Jtb	Jtb	D3Z4D1;O88824	Jumping translocation breakpoint;Protein JTB	0.174533	8.76559	0.713779	0.8539	0.382021	-6.42692
Kid. Cortex	Mouse	C2cd3	C2cd3	D3Z4D9;D3Z640;E9Q526;Q52KB6	C2 calcium-dependent domain containing 3 (Fragment);C2 calcium-dependent domain containing 3 (Fragment);C2 calcium-dependent domain containing 3;C2 domain-containing protein 3	-0.187267	9.11686	0.303826	0.541062	-1.09878	-5.93255
Kid. Cortex	Mouse	Vezt	Vezt	D3Z4E6;Q3ZK22	Vezatin	-0.191627	8.75418	0.0712328	0.243438	-2.04459	-4.76651
Kid. Cortex	Mouse	Eml1	Eml1	D3Z4J9;Q05BC3	Echinoderm microtubule associated protein like 1;Echinoderm microtubule-associated protein-like 1	0.459242	12.5811	0.000153286	0.011573	6.22966	1.36318
Kid. Cortex	Mouse	Tnfaip2	Tnfaip2	D3Z4L9;Q61333	Tumor necrosis factor, alpha-induced protein 2;Tumor necrosis factor alpha-induced protein 2	-0.0302577	10.4163	0.852237	0.92958	-0.191694	-6.61487
Kid. Cortex	Mouse	Fastk	Fastk	D3Z4M5;E9QA06;Q8C725;Q9JIX9	Fas-activated serine/threonine kinase	0.215827	6.89345	0.741029	0.869583	0.362469	-5.97129
Kid. Cortex	Mouse	Anapc5	Anapc5	A0A0G2JDM7;A0A0G2JE03;Q3TWF7;Q8BTZ4	Anaphase-promoting complex subunit 5	0.176263	11.4234	0.111515	0.314082	1.76423	-5.17899
Kid. Cortex	Mouse	Tsfm	Tsfm	D3Z4M7	Ts translation elongation factor, mitochondrial	0.332454	13.0733	0.021224	0.124945	2.78505	-3.59943
Kid. Cortex	Mouse	Lman2l	Lman2l	D3Z4P2;P59481	Lectin, mannose-binding 2-like;VIP36-like protein	-0.116223	15.298	0.126166	0.3359	-1.68553	-5.2898
Kid. Cortex	Mouse	Ptrhd1	Ptrhd1	D3Z4S3	Putative peptidyl-tRNA hydrolase PTRHD1	0.228447	12.5288	0.11058	0.312647	1.76957	-5.17138
Kid. Cortex	Mouse	Zranb2	Zranb2	D3Z4U0;E9PUD0;Q9R020	Zinc finger Ran-binding domain-containing protein 2	0.138802	12.1452	0.0831434	0.26504	1.94866	-4.9104
Kid. Cortex	Mouse	Plrg1	Plrg1	D3Z4V1;Q922V4	Pleiotropic regulator 1	0.264986	12.353	0.0312016	0.154004	2.54985	-3.97698
Kid. Cortex	Mouse	Arl10	Arl10	D3Z4X7;Q9QXJ4	ADP-ribosylation factor-like 10 (Fragment);ADP-ribosylation factor-like protein 10	-0.179826	10.5246	0.409213	0.639904	-0.887012	-5.9666
Kid. Cortex	Mouse	Tada2b	Tada2b	D3Z4Z0	Transcriptional adapter	0.154461	9.27429	0.46836	0.692381	0.757075	-6.33158
Kid. Cortex	Mouse	Eva1a	Eva1a	D3Z511;Q91WM6	Eva-1 homolog A (C. elegans) (Fragment);Protein eva-1 homolog A	-0.419219	13.4862	0.025117	0.136716	-2.68214	-3.76499
Kid. Cortex	Mouse	Dnase2a	Dnase2a;Dnase2	D3Z512;P56542	deoxyribonuclease II;Deoxyribonuclease-2-alpha	0.805191	11.0779	0.1536	0.37451	1.55825	-5.46338
Kid. Cortex	Mouse	Sgce	Sgce	D3Z572;E9PX46;F6R6P2;F6WKE4;F8WGM3;O70258	Sarcoglycan, epsilon;Sarcoglycan, epsilon;Sarcoglycan, epsilon;Sarcoglycan, epsilon;Sarcoglycan, epsilon;Epsilon-sarcoglycan	-0.224698	9.96449	0.254358	0.492342	-1.21753	-5.88645
Kid. Cortex	Mouse	Emcn	Emcn	A0A0G2JDR2;Q9R0H2	Endomucin (Fragment);Endomucin	0.741089	10.4437	0.00415149	0.0508635	3.8102	-1.96681
Kid. Cortex	Mouse	Ltbp4	Ltbp4	D3Z598;E9QPS5;Q8K4G1	Latent transforming growth factor beta binding protein 4;Latent transforming growth factor beta binding protein 4;Latent-transforming growth factor beta-binding protein 4	0.554718	12.2251	0.0793448	0.258328	1.97775	-4.86704
Kid. Cortex	Mouse	Kics2	Kics2	D3Z5F2;Q6P1I3	KICSTOR subunit 2	0.71158	8.75316	0.0403181	0.176112	2.44388	-4.13628
Kid. Cortex	Mouse	Gm20521	Gm20521	D3Z5F7	Predicted gene 20521	-0.0386932	12.9441	0.602651	0.788993	-0.539469	-6.47851
Kid. Cortex	Mouse	Ces1b	Ces1b	D3Z5G7	Carboxylic ester hydrolase	1.66786	9.55784	0.000365107	0.0157282	7.19308	0.785852
Kid. Cortex	Mouse	Sec11c	Sec11c	D3Z5H3;Q9D8V7	Signal peptidase complex catalytic subunit SEC11;Signal peptidase complex catalytic subunit SEC11C	0.00188295	9.96759	0.98975	0.995705	0.0132083	-6.6348
Kid. Cortex	Mouse	Kmt2a	Kmt2a	D3Z5H5;P55200	Lysine (K)-specific methyltransferase 2A (Fragment);Histone-lysine N-methyltransferase 2A	0.199742	8.74393	0.347082	0.582298	0.998925	-6.06472
Kid. Cortex	Mouse	Zc3hav1	Zc3hav1	D3Z5I1	Zinc finger CCCH type, antiviral 1	0.59595	11.1342	0.000874371	0.0235132	4.87742	-0.389108
Kid. Cortex	Mouse	Rbm33	Rbm33	D3Z5I9;Q9CXK9	RNA binding motif protein 33;RNA-binding protein 33	0.139922	10.2653	0.167635	0.391591	1.50084	-5.53918
Kid. Cortex	Mouse	Shank2	Shank2	D3Z5K8	SH3 and multiple ankyrin repeat domains 2	-0.292751	11.2148	0.0566982	0.213256	-2.18512	-4.5515
Kid. Cortex	Mouse	Pxdn	Pxdn	D3Z5M7	Peroxidasin	0.581002	10.635	0.0898919	0.276569	1.89996	-4.98243
Kid. Cortex	Mouse	Gm42878	Gm42878;Mapkapk5	A0A0G2JDU2;O54992	non-specific serine/threonine protein kinase;MAP kinase-activated protein kinase 5	-0.00397058	10.0566	0.973005	0.986985	-0.0347918	-6.63423
Kid. Cortex	Mouse	Fgfr2	Fgfr2	D3Z5M8;E9PVU6;E9PX60;E9PX67;E9PX88;E9PX90;E9PXV8;E9Q5C2;E9Q5C3;E9Q708;E9Q7C7;E9Q7E8;E9Q7T0;E9QK53	receptor protein-tyrosine kinase (Fragment);receptor protein-tyrosine kinase (Fragment);receptor protein-tyrosine kinase (Fragment);receptor protein-tyrosine kinase (Fragment);receptor protein-tyrosine kinase (Fragment);receptor protein-tyrosine kinase (Fragment);receptor protein-tyrosine kinase (Fragment);Fibroblast growth factor receptor;receptor protein-tyrosine kinase (Fragment);receptor prot…	0.0722918	10.9957	0.512689	0.72798	0.681531	-6.38765
Kid. Cortex	Mouse	Pikfyve	Pikfyve	D3Z5N5;Q9Z1T6	1-phosphatidylinositol-3-phosphate 5-kinase;1-phosphatidylinositol 3-phosphate 5-kinase	-0.00269195	11.6024	0.958362	0.979744	-0.0536809	-6.63332
Kid. Cortex	Mouse	Dpf2	Dpf2	D3Z5N6;Q61103	Double PHD fingers 2;Zinc finger protein ubi-d4	0.0820228	11.8567	0.490188	0.71043	0.719337	-6.36025
Kid. Cortex	Mouse	Plekhg2	Plekhg2	D3Z5N8;E9QKB6;G5E8T4;Q6KAU7	Pleckstrin homology domain containing, family G (with RhoGef domain) member 2;PLEKHG2;Pleckstrin homology domain containing, family G (with RhoGef domain) member 2;Pleckstrin homology domain-containing family G member 2	0.431677	11.5964	0.0485487	0.19557	2.32485	-4.317
Kid. Cortex	Mouse	Csgalnact2	Csgalnact2	D3Z5Q0;Q8C1F4	Hexosyltransferase (Fragment);Chondroitin sulfate N-acetylgalactosaminyltransferase 2	-0.218968	10.1282	0.382802	0.61396	-0.931074	-6.05142
Kid. Cortex	Mouse	Cgas	Cgas	D3Z5R0;F6ZBV6;Q8C6L5	Cyclic GMP-AMP synthase;Cyclic GMP-AMP synthase (Fragment);Cyclic GMP-AMP synthase	0.139571	8.4766	0.686073	0.837899	0.424394	-6.34152
Kid. Cortex	Mouse	Arhgap24	Arhgap24	D3Z5T4;G3X9N1;Q8C4V1	Rho GTPase activating protein 24;Rho GTPase activating protein 24;Rho GTPase-activating protein 24	-0.103323	13.2924	0.14239	0.360102	-1.60757	-5.397
Kid. Cortex	Mouse	P2rx4	P2rx4	D3Z5U5;Q9Z257	P2X purinoceptor	0.367498	12.0198	0.00121767	0.0271158	4.64083	-0.724577
Kid. Cortex	Mouse	Ppa2	Ppa2	D3Z636	inorganic diphosphatase	-0.0439322	9.26793	0.929597	0.966048	-0.0915799	-6.50295
Kid. Cortex	Mouse	Tpd52	Tpd52	D3Z637	Tumor protein D52	-0.236459	10.4664	0.239351	0.476453	-1.27125	-5.74166
Kid. Cortex	Mouse	Gbp6	Gbp6;Gbp6;Gm43302	A0A0G2JDV3;A0A8Q0QEH4;L7N1X8	Guanylate-binding protein 6;Guanylate binding protein 6;Predicted gene 43302	0.544808	11.2371	0.00382936	0.0486346	3.86296	-1.88516
Kid. Cortex	Mouse	Tspan5	Tspan5	D3Z641;P62080	Tetraspanin;Tetraspanin-5	-0.696959	9.66911	0.0107982	0.0853384	-3.20187	-2.92834
Kid. Cortex	Mouse	Vps29	Vps29	D3Z645;Q9QZ88	Vacuolar protein sorting-associated protein 29	0.0350047	13.9964	0.737575	0.868041	0.345613	-6.57009
Kid. Cortex	Mouse	Ube2q2	Ube2q2	D3Z647;Q8K2Z8	Ubiquitin-conjugating enzyme E2Q family member 2;Ubiquitin-conjugating enzyme E2 Q2	0.288404	10.4704	0.0619077	0.224222	2.13112	-4.63466
Kid. Cortex	Mouse	Synj1	Synj1	D3Z656;Q8CHC4	phosphoinositide 5-phosphatase;Synaptojanin-1	0.0761415	12.5576	0.427236	0.657303	0.831431	-6.27138
Kid. Cortex	Mouse	0610010K14Rik	0610010K14Rik;Bap18	D3Z687;Q9DCT6	RIKEN cDNA 0610010K14 gene;Chromatin complexes subunit BAP18	0.0633335	11.1894	0.469572	0.693338	0.754949	-6.33323
Kid. Cortex	Mouse	Adamtsl5	Adamtsl5	D3Z689	ADAMTS-like 5	0.803132	8.79104	0.00019185	0.0120196	6.044	1.13897
Kid. Cortex	Mouse	Stau2	Stau2	D3Z6D2;E2QRQ3;Q8CJ67	Double-stranded RNA-binding protein Staufen homolog 2	0.189805	10.2145	0.257877	0.495608	1.20787	-5.89742
Kid. Cortex	Mouse	Mapre3	Mapre3	D3Z6G3	Microtubule-associated protein, RP/EB family, member 3	0.105071	10.4859	0.591461	0.780514	0.55646	-6.46867
Kid. Cortex	Mouse	Dctn6	Dctn6	D3Z6H3;Q9WUB4	Dynactin subunit 6	0.0402528	11.6348	0.748713	0.874294	0.330325	-6.57567
Kid. Cortex	Mouse	Prkd3	Prkd3	D3Z6I0;Q5FWX6;Q8K1Y2	protein kinase C;Serine/threonine-protein kinase;Serine/threonine-protein kinase D3	0.331731	10.5662	0.006915	0.0675276	3.48211	-2.48132
Kid. Cortex	Mouse	Myl3	Myl3	A0A0G2JDW2;P09542	Myosin, light polypeptide 3 (Fragment);Myosin light chain 3	-0.0217577	10.2939	0.815975	0.910577	-0.239643	-6.60363
Kid. Cortex	Mouse	Tpm3	Tpm3	D3Z6I8	Tropomyosin 3, gamma	-0.0772052	16.0378	0.528703	0.739935	-0.65524	-6.40592
Kid. Cortex	Mouse	Cnep1r1	Cnep1r1	D3Z6J3;Q3UJ81	Nuclear envelope phosphatase-regulatory subunit 1	0.0506665	11.4338	0.609651	0.792496	0.528926	-6.48447
Kid. Cortex	Mouse	Igsf11	Igsf11	D3Z6S7;P0C673	Immunoglobulin superfamily, member 11;Immunoglobulin superfamily member 11	-0.436572	10.4983	0.0641792	0.227903	-2.10894	-4.66863
Kid. Cortex	Mouse	Map6	Map6	D3Z6W1;Q7TSJ2	Microtubule-associated protein 6	0.343548	10.2341	0.0447316	0.187236	2.44039	-4.11875
Kid. Cortex	Mouse	Ptpn2	Ptpn2	D3Z6W2;Q06180	Tyrosine-protein phosphatase non-receptor type;Tyrosine-protein phosphatase non-receptor type 2	0.232334	11.4931	0.0114059	0.0883817	3.16778	-2.98305
Kid. Cortex	Mouse	Tmem9b	Tmem9b	D3Z6W5;Q9JJR8	TMEM9 domain family, member B;Transmembrane protein 9B	-0.322052	11.794	0.0393245	0.174083	-2.40881	-4.2013
Kid. Cortex	Mouse	Gxylt1	Gxylt1	D3Z6W7;Q3UHH8	Glucoside xylosyltransferase 1	0.490629	9.0305	0.0227689	0.129173	2.74208	-3.6686
Kid. Cortex	Mouse	Supt7l	Supt7l	D3Z6Y8;E9PX66;Q9CZV5	SPT7-like, STAGA complex gamma subunit;SPT7-like, STAGA complex gamma subunit;STAGA complex 65 subunit gamma	0.0535074	9.7897	0.708528	0.851214	0.385909	-6.55424
Kid. Cortex	Mouse	Rasal3	Rasal3	D3Z6Z7;Q8C2K5	RAS protein activator like 3;RAS protein activator like-3		9.83469
Kid. Cortex	Mouse	Klc3	Klc3	D3Z710;Q91W40	Kinesin light chain;Kinesin light chain 3	0.284481	10.8933	0.196003	0.426411	1.39664	-5.67234
Kid. Cortex	Mouse	Ighv1-5	Ighv1-5	A0A075B5T5	Immunoglobulin heavy variable V1-5		10.2865
Kid. Cortex	Mouse	Rps27	Rps27	A0A0G2JDW7;Q6ZWU9	40S ribosomal protein S27 (Fragment);40S ribosomal protein S27	-0.0287729	13.3901	0.79918	0.903148	-0.262052	-6.59753
Kid. Cortex	Mouse	Nfyb	Nfyb	D3Z723;P63139	Nuclear transcription factor Y subunit beta (Fragment);Nuclear transcription factor Y subunit beta	-0.319371	10.7262	0.483595	0.705517	-0.746467	-6.08332
Kid. Cortex	Mouse	Eif4e2	Eif4e2	D3Z730;M0QWD1	Eukaryotic translation initiation factor 4E member 2;Eukaryotic translation initiation factor 4E member 2 (Fragment)		5.75195
Kid. Cortex	Mouse	Rad18	Rad18	D3Z733;D3Z734;E9Q392;Q9QXK2;W4VSP9	RING-type E3 ubiquitin transferase;RING-type E3 ubiquitin transferase;RING-type E3 ubiquitin transferase;E3 ubiquitin-protein ligase RAD18;RING-type E3 ubiquitin transferase	0.956537	9.18028	0.000985096	0.0240127	5.05326	-0.395497
Kid. Cortex	Mouse	Mb21d2	Mb21d2	D3Z742;Q8C525	Mab-21 domain containing 2;Nucleotidyltransferase MB21D2	0.0700007	11.4268	0.607482	0.79108	0.532186	-6.48264
Kid. Cortex	Mouse	Mroh2a	Mroh2a	D3Z750;F5H8M8	Maestro heat-like repeat-containing protein family member 2A;Maestro heat-like repeat family member 2A	0.210547	10.3197	0.374758	0.607104	0.933845	-6.18066
Kid. Cortex	Mouse	Lin37	Lin37	D3Z769;E9Q0Q9;Q9D8N6	Lin-37 DREAM MuvB core complex component (Fragment);Lin-37 DREAM MuvB core complex component;Protein lin-37 homolog	-0.0181791	9.19011	0.908654	0.956866	-0.118421	-6.57542
Kid. Cortex	Mouse	Eif2b4	Eif2b4	D3Z780;Q61749	Eukaryotic translation initiation factor 2B, subunit 4 delta;Translation initiation factor eIF-2B subunit delta	-0.0263248	12.575	0.697604	0.84645	-0.401238	-6.54776
Kid. Cortex	Mouse	Akt1	Akt1	D3Z783;P31750	non-specific serine/threonine protein kinase;RAC-alpha serine/threonine-protein kinase	0.266992	11.6521	0.023604	0.131314	2.72007	-3.70401
Kid. Cortex	Mouse	Sumo2	Sumo2;Sumo3;Sumo3;Gm49325;Sumo3;Sumo3;Sumo2;Sumo2;Sumo3	D3Z794;G3UWI9;G3UWX9;G3UZ60;G3UZA7;G3UZX6;H7BWX9;P61957;Q9Z172	Small ubiquitin-like modifier 2;Small ubiquitin-like modifier 3;Small ubiquitin-like modifier 3;Predicted gene, 49325;Small ubiquitin-related modifier;Small ubiquitin-like modifier 3 (Fragment);Small ubiquitin-like modifier 2;Small ubiquitin-related modifier 2;Small ubiquitin-related modifier 3	0.35	13.0035	0.0903036	0.277445	1.8971	-4.98663
Kid. Cortex	Mouse	Fmnl3	Fmnl3	D3Z7A7;Q6ZPF4	Formin-like 3;Formin-like protein 3	0.279982	11.4628	0.00779017	0.0711938	3.40666	-2.60111
Kid. Cortex	Mouse	Tuft1	Tuft1	A0A0G2JDW8;O08970	Tuftelin 1;Tuftelin	-0.176743	8.04953	0.466804	0.691142	-0.803326	-5.88677
Kid. Cortex	Mouse	Rubcn	Rubcn	D3Z7B1;Q80U62	RUN domain and cysteine-rich domain containing, Beclin 1-interacting protein;Run domain Beclin-1-interacting and cysteine-rich domain-containing protein	0.0532412	9.48562	0.644555	0.814532	0.477258	-6.51207
Kid. Cortex	Mouse	Sufu	Sufu	D3Z7B6;Q9Z0P7	Suppressor of fused homolog	-0.170025	10.114	0.105934	0.305489	-1.79674	-5.13251
Kid. Cortex	Mouse	Mrpl40	Mrpl40	D3Z7C0;Q9Z2Q5	Mitochondrial ribosomal protein L40;39S ribosomal protein L40, mitochondrial	-0.133981	12.8001	0.127913	0.337711	-1.67671	-5.30206
Kid. Cortex	Mouse	Dip2a	Dip2a	D3Z7D3;F8WI56	Disco interacting protein 2 homolog A	-0.0540324	11.804	0.482811	0.704668	-0.731968	-6.3508
Kid. Cortex	Mouse	Rnft2	Rnft2	D3Z7E1	Ring finger protein, transmembrane 2 (Fragment)	0.501494	10.7046	0.0836715	0.265833	1.94472	-4.91626
Kid. Cortex	Mouse	Gsk3a	Gsk3a	D3Z7E5;Q2NL51	[tau protein] kinase;Glycogen synthase kinase-3 alpha	0.018347	11.7617	0.832922	0.920456	0.217165	-6.60921
Kid. Cortex	Mouse	Cyp2t4	Cyp2t4	D3Z7F6;E9PWV0	Cytochrome P450, family 2, subfamily t, polypeptide 4;Cytochrome P450, family 2, subfamily t, polypeptide 4	1.13016	10.3311	0.306777	0.543171	1.09163	-5.97087
Kid. Cortex	Mouse	Slc4a4	Slc4a4	D3Z7G8	Solute carrier family 4 (anion exchanger), member 4 (Fragment)	-0.442179	14.644	0.000782913	0.0222607	-4.95767	-0.277279
Kid. Cortex	Mouse	Gtf3c2	Gtf3c2	D3Z7I0	General transcription factor IIIC, polypeptide 2, beta	0.198543	10.8641	0.0778674	0.255915	1.98942	-4.84958
Kid. Cortex	Mouse	Anp32a	Anp32a	D3Z7M9;O35381	Acidic leucine-rich nuclear phosphoprotein 32 family member;Acidic leucine-rich nuclear phosphoprotein 32 family member A	0.171314	14.9665	0.0947968	0.286646	1.86668	-5.03121
Kid. Cortex	Mouse	Myl10	Myl10	A0A0G2JDZ4;E9QNY3	Myosin, light chain 10, regulatory;Myosin, light chain 10, regulatory	0.534889	10.4623	0.0087358	0.0757766	3.33449	-2.7161
Kid. Cortex	Mouse	Slc39a6	Slc39a6	D3Z7N4;Q8C145	Solute carrier family 39 (metal ion transporter), member 6 (Fragment);Zinc transporter ZIP6	-0.0396121	10.8451	0.80918	0.907435	-0.248694	-6.60123
Kid. Cortex	Mouse	Gls	Gls	D3Z7P3	Glutaminase kidney isoform, mitochondrial	0.176442	16.282	0.279266	0.517234	1.15132	-5.96036
Kid. Cortex	Mouse	Smim20	Smim20	D3Z7Q2	Small integral membrane protein 20	-0.361883	12.0634	0.0444692	0.186302	-2.33379	-4.31965
Kid. Cortex	Mouse	Ccpg1	Ccpg1	D3Z7R9;Q640L3	Cell cycle progression 1;Cell cycle progression protein 1	-0.0510406	10.7586	0.531381	0.741847	-0.65089	-6.40888
Kid. Cortex	Mouse	Tmem208	Tmem208	D3Z7S5;Q9CR96;S4R1H6	Transmembrane protein 208	1.28886	9.71736	0.175027	0.400848	1.47229	-5.57624
Kid. Cortex	Mouse	Mecp2	Mecp2	D3Z7U4	Methyl CpG binding protein 2	-0.0136966	12.8528	0.923773	0.963502	-0.0983978	-6.62961
Kid. Cortex	Mouse	Iscu	Iscu	D3Z7W0;Q9D7P6	Iron-sulfur cluster assembly enzyme;Iron-sulfur cluster assembly enzyme ISCU	-0.0210189	14.4643	0.817528	0.911468	-0.237579	-6.60417
Kid. Cortex	Mouse	Acad12	Acad12	D3Z7X0	Acyl-Coenzyme A dehydrogenase family, member 12	-0.335199	15.4923	0.00705309	0.0682245	-3.46957	-2.50121
Kid. Cortex	Mouse	Alkbh4	Alkbh4	D3Z7X9;Q9D8F1	AlkB homolog 4, lysine demethylase (Fragment);Alpha-ketoglutarate-dependent dioxygenase alkB homolog 4	-0.650375	7.57375	0.0256102	0.13808	-3.46867	-2.97784
Kid. Cortex	Mouse	Cuta	Cuta	D5MCW4;Q9CQ89	CutA divalent cation tolerance homolog;Protein CutA	0.12502	11.395	0.171726	0.397166	1.48491	-5.55992
Kid. Cortex	Mouse	Ankrd17	Ankrd17	A0A0G2JDZ9;E9Q804;Q99NH0	Ankyrin repeat domain 17;Ankyrin repeat domain 17;Ankyrin repeat domain-containing protein 17	0.0591233	13.9749	0.48647	0.707893	0.725688	-6.35551
Kid. Cortex	Mouse	Slc25a38	Slc25a38	D6RCI6;D6RCX1;Q91XD8	Solute carrier family 25, member 38;Solute carrier family 25, member 38;Mitochondrial glycine transporter	-0.195855	10.5661	0.270458	0.507324	-1.18383	-5.84083
Kid. Cortex	Mouse	Rhbdd2	Rhbdd2	D6RCZ4;Q8VEK2	Rhomboid domain containing 2;Rhomboid domain-containing protein 2	0.135929	9.82851	0.368138	0.60098	0.947478	-6.16793
Kid. Cortex	Mouse	Mfsd2b	Mfsd2b	D6RDD7	Major facilitator superfamily domain containing 2B		1.2697
Kid. Cortex	Mouse	Desi1	Desi1	D6RDE8;Q3TCG9;Q9CQT7	Desumoylating isopeptidase 1	-0.00698842	11.2788	0.946277	0.974391	-0.0692857	-6.63227
Kid. Cortex	Mouse	Selenoi	Selenoi	D6RE20;Q80TA1;Q8CET7	Selenoprotein I;Ethanolaminephosphotransferase 1;Selenoprotein I	0.125819	9.13419	0.464832	0.689445	0.763279	-6.32675
Kid. Cortex	Mouse	Grhpr	Grhpr	D6REG4	Glyoxylate reductase/hydroxypyruvate reductase	0.00479803	10.7828	0.987222	0.994211	0.0164663	-6.63475
Kid. Cortex	Mouse	Pxmp2	Pxmp2	D6REH1	Peroxisomal membrane protein 2	-0.155315	12.444	0.44544	0.672393	-0.797953	-6.29909
Kid. Cortex	Mouse	Gpatch1	Gpatch1	D6RET6;Q9DBM1	G patch domain containing 1;G patch domain-containing protein 1	-0.00165332	10.1263	0.983885	0.992844	-0.0207663	-6.63466
Kid. Cortex	Mouse	Casp2	Casp2	D6RFN6;P29594	Caspase 2;Caspase-2	0.780439	9.01827	0.0106182	0.0847587	3.21235	-2.91153
Kid. Cortex	Mouse	Tesk1	Tesk1	D6RFP6;O70146	Testis specific protein kinase 1;Dual specificity testis-specific protein kinase 1	-0.11784	8.59682	0.673522	0.830746	-0.437208	-6.47891
Kid. Cortex	Mouse	Magi2	Magi2	A0A0G2JE00;A0A0G2JEG6	Membrane associated guanylate kinase, WW and PDZ domain containing 2;Membrane associated guanylate kinase, WW and PDZ domain containing 2	-0.294393	11.7586	0.0681021	0.237064	-2.07236	-4.72439
Kid. Cortex	Mouse	Sypl	Sypl	D6RFU9	Synaptophysin-like protein	0.047466	12.3987	0.752096	0.875408	0.325699	-6.5773
Kid. Cortex	Mouse	Rfc4	Rfc4	D6RGM1;Q3UI84;Q99J62	Replication factor C (activator 1) 4 (Fragment);Replication factor C (activator 1) 4;Replication factor C subunit 4	0.312318	11.0331	0.00296188	0.0421968	4.03242	-1.62527
Kid. Cortex	Mouse	Wdr83	Wdr83	D6RGR4;Q9DAJ4	WD repeat domain containing 83 (Fragment);WD repeat domain-containing protein 83	-0.0608573	9.36321	0.745242	0.872765	-0.33508	-6.57396
Kid. Cortex	Mouse	Pld1	Pld1	D6RH77;Q6NVF2	Phospholipase	0.0293769	10.74	0.738498	0.868041	0.344341	-6.57057
Kid. Cortex	Mouse	Iffo1	Iffo1	D6RH90;Q8BXL9	Intermediate filament family orphan 1;Non-homologous end joining factor IFFO1	0.014674	8.30585	0.94688	0.974493	0.0690515	-6.50498
Kid. Cortex	Mouse	Tmem50b	Tmem50b	D6RH99;D6RJK9;Q9D1X9	Transmembrane protein 50B	0.122927	10.8883	0.45678	0.682163	0.777559	-6.31549
Kid. Cortex	Mouse	Tmtc4	Tmtc4	D6RHA9;Q8BG19	Transmembrane and tetratricopeptide repeat containing 4;Protein O-mannosyl-transferase TMTC4	0.232141	9.13108	0.261042	0.49856	1.19927	-5.90713
Kid. Cortex	Mouse	Gm50364	Gm50364;Ier3ip1	D6RI20;Q9CR20	Immediate early response 3-interacting protein 1	0.279923	12.0536	0.113292	0.316756	1.75419	-5.19325
Kid. Cortex	Mouse	Slc49a4	Slc49a4	D6RI31;Q8BFQ6	Solute carrier family 49 member 4	0.125103	10.1036	0.456382	0.681994	0.782631	-6.25763
Kid. Cortex	Mouse	Prdm15	Prdm15	D6RIL7;E9Q8T2	PR domain containing 15;PR domain zinc finger protein 15	-0.253465	9.57193	0.355556	0.589607	-1.04366	-5.53886
Kid. Cortex	Mouse	Slc7a7	Slc7a7	A0A0G2JE10;A0A0G2JEB8;A0A2I3BPU1;A0A2I3BQK2;A0A2I3BQX2;Q9Z1K8	Solute carrier family 7 (cationic amino acid transporter, y+ system), member 7 (Fragment);Solute carrier family 7 (cationic amino acid transporter, y+ system), member 7 (Fragment);Solute carrier family 7 (cationic amino acid transporter, y+ system), member 7 (Fragment);Solute carrier family 7 (cationic amino acid transporter, y+ system), member 7 (Fragment);Solute carrier family 7 (cationic amino…	-0.354126	13.3401	0.0872142	0.272537	-1.91886	-4.95457
Kid. Cortex	Mouse	Pbx1	Pbx1	D9J2V6;P41778	Pre B cell leukemia homeobox 1;Pre-B-cell leukemia transcription factor 1	0.161938	10.0006	0.464208	0.688851	0.76438	-6.32589
Kid. Cortex	Mouse	Tmem120b	Tmem120b	E0CX33;E0CYA8;Q3TA38	Transmembrane protein 120B (Fragment);Transmembrane protein 120B;Transmembrane protein 120B	-0.161987	9.71012	0.488835	0.710106	-0.721644	-6.35853
Kid. Cortex	Mouse	Ggact	Ggact	E0CX39;E0CZ04;H3BKQ5;Q923B0	Gamma-glutamylaminecyclotransferase (Fragment);Gamma-glutamylaminecyclotransferase (Fragment);Gamma-glutamylaminecyclotransferase;Gamma-glutamylaminecyclotransferase	-0.210733	12.8698	0.125438	0.335169	-1.68924	-5.28464
Kid. Cortex	Mouse	Tbc1d4	Tbc1d4	E0CX53;E9Q6Q8;Q8BYJ6	TBC1 domain family, member 4;TBC1 domain family, member 4;TBC1 domain family member 4	-0.00753728	9.66806	0.940646	0.971638	-0.0765627	-6.63169
Kid. Cortex	Mouse	Sgtb	Sgtb	E0CX61;E0CZ99;Q8VD33	Small glutamine-rich tetratricopeptide repeat (TPR)-containing, beta (Fragment);Small glutamine-rich tetratricopeptide repeat (TPR)-containing, beta (Fragment);Small glutamine-rich tetratricopeptide repeat-containing protein beta	-0.541237	8.51455	0.0630163	0.226133	-2.88973	-3.67212
Kid. Cortex	Mouse	Selenop	Selenop	E0CX80;P70274	Selenoprotein P (Fragment);Selenoprotein P	0.254565	10.7949	0.0357767	0.166173	2.46645	-4.10988
Kid. Cortex	Mouse	Tmbim6	Tmbim6	E0CX98;E0CXR0;E0CZE8;Q9D2C7	Bax inhibitor 1 (Fragment);Bax inhibitor 1 (Fragment);Transmembrane BAX inhibitor motif containing 6 (Fragment);Bax inhibitor 1	-0.121475	12.6575	0.758366	0.878462	-0.317146	-6.58027
Kid. Cortex	Mouse	Sidt2	Sidt2	E0CXC7;Q8CIF6	SID1 transmembrane family, member 2 (Fragment);SID1 transmembrane family member 2	0.268704	11.5739	0.0473813	0.193235	2.29504	-4.38045
Kid. Cortex	Mouse	Etv1	Etv1	E0CXD2;E0CYN8;E0CZ37;E0CZ54;P41164;Q8CCR6	Ets variant 1;Ets variant 1;Ets variant 1;Ets variant 1;ETS translocation variant 1;Ets variant 1	0.315546	10.5836	0.663894	0.826144	0.451099	-6.47227
Kid. Cortex	Mouse	Grip2	Grip2	E0CXE0;E0CXS4;G3XA20	Glutamate receptor interacting protein 2	-0.253786	11.1009	0.606167	0.790338	-0.536559	-6.4271
Kid. Cortex	Mouse	Ube2d3	Ube2d3;Ube2d3;Ube2d2a;Ube2d2a;Ube2d3;Ube2d2	A0A0G2JE32;A0A0G2JGL0;A0A494BA56;A0A494BAN1;P61079;P62838	Ubiquitin-conjugating enzyme E2D 3 (Fragment);Ubiquitin-conjugating enzyme E2D 3;Ubiquitin-conjugating enzyme E2D 2A (Fragment);Ubiquitin-conjugating enzyme E2D 2A (Fragment);Ubiquitin-conjugating enzyme E2 D3;Ubiquitin-conjugating enzyme E2 D2	0.00273411	15.3065	0.9805	0.9907	0.0251301	-6.63455
Kid. Cortex	Mouse	Ctc1	Ctc1	E0CXE7;Q5SUQ9	CST complex subunit CTC1	-0.0437811	10.5583	0.786051	0.895298	-0.27967	-6.59237
Kid. Cortex	Mouse	Eif2s2	Eif2s2	E0CXJ3	Eukaryotic translation initiation factor 2, subunit 2 (beta) (Fragment)	-0.152456	9.17739	0.339852	0.575028	-1.03666	-5.82586
Kid. Cortex	Mouse	Mst1	Mst1	E0CXN0;P26928	Macrophage stimulating 1 (hepatocyte growth factor-like);Hepatocyte growth factor-like protein	0.597678	9.18703	0.0474925	0.193351	2.39959	-4.17776
Kid. Cortex	Mouse	Tle3	Tle3	E0CXS2;Q08122	Transducin-like enhancer of split 3;Transducin-like enhancer protein 3	0.0623193	14.7675	0.738651	0.868041	0.344132	-6.57064
Kid. Cortex	Mouse	Ghr	Ghr	E0CXS6;P16882;Q3UP14	Growth hormone receptor (Fragment);Growth hormone receptor;Growth hormone receptor	-0.268055	11.5252	0.304179	0.541388	-1.08965	-6.02643
Kid. Cortex	Mouse	Dab2	Dab2	E0CXT5	Disabled 2, mitogen-responsive phosphoprotein	-0.440257	9.23622	0.0133384	0.0970089	-3.16276	-3.01258
Kid. Cortex	Mouse	Adck5	Adck5	E0CXW2;E9PUK2	AarF domain containing kinase 5	-0.175924	12.2288	0.0298884	0.150394	-2.57605	-3.93508
Kid. Cortex	Mouse	Mpnd	Mpnd	E0CXX6;E0CYJ7;F7BJW2;Q3TV65	MPN domain containing;MPN domain containing;MPN domain containing (Fragment);MPN domain-containing protein	0.0185963	9.50386	0.88422	0.946236	0.149807	-6.62265
Kid. Cortex	Mouse	Atpsckmt	Atpsckmt	E0CXY7;Q9D1Z3	ATP synthase C subunit lysine N-methyltransferase;ATP synthase subunit C lysine N-methyltransferase	-0.0949086	10.8206	0.571009	0.769041	-0.587969	-6.44968
Kid. Cortex	Mouse	Fsd1l	Fsd1l	E0CXZ1;F8WGT4;J3QM95;Q8BYN5	Fibronectin type III and SPRY domain containing 1-like (Fragment);Fibronectin type III and SPRY domain containing 1-like (Fragment);Fibronectin type III and SPRY domain containing 1-like;FSD1-like protein	0.413385	9.28277	0.058003	0.216199	2.17115	-4.57306
Kid. Cortex	Mouse	Stard3nl	Stard3nl	A0A0G2JE93;A0A1Y7VJA7;Q9DCI3	STARD3 N-terminal like;STARD3 N-terminal like;STARD3 N-terminal-like protein	0.300531	11.8087	0.0908374	0.278562	1.89342	-4.99205
Kid. Cortex	Mouse	Dnm3	Dnm3	E0CXZ8;F2Z460	Dynamin 3	-0.0811577	9.0382	0.570423	0.768502	-0.588881	-6.44912
Kid. Cortex	Mouse	Tmem167	Tmem167;Tmem167a	E0CY07;Q9CR64	Protein kish;Protein kish-A	0.346271	12.4925	0.251847	0.490268	1.2245	-5.8785
Kid. Cortex	Mouse	Zfand2b	Zfand2b	E0CY18;Q91X58	Zinc finger, AN1 type domain 2B (Fragment);AN1-type zinc finger protein 2B	0.481496	10.3904	0.446952	0.673425	0.795214	-6.30131
Kid. Cortex	Mouse	Arrdc3	Arrdc3	E0CY84;Q7TPQ9	Arrestin domain containing 3;Arrestin domain-containing protein 3	0.0777664	8.6353	0.72011	0.858029	0.369762	-6.56079
Kid. Cortex	Mouse	Pole4	Pole4	E0CYA9;Q9CQ36	Polymerase (DNA-directed), epsilon 4 (p12 subunit);DNA polymerase epsilon subunit 4	0.277041	8.77121	0.0621458	0.224781	2.16659	-4.55477
Kid. Cortex	Mouse	Mff	Mff	E0CYB9;Q6PCP5	Mitochondrial fission factor	-0.0890317	12.5426	0.22075	0.455405	-1.31586	-5.77136
Kid. Cortex	Mouse	Cdk8	Cdk8	E0CYC4;E9Q6E2;Q8R3L8	Cyclin-dependent kinase 8 (Fragment);Cyclin-dependent kinase 8;Cyclin-dependent kinase 8	1.11518	8.82191	0.0403014	0.176112	2.75011	-3.70689
Kid. Cortex	Mouse	Impdh1	Impdh1	E0CYE2;F7DEU6;P50096	Inosine-5'-monophosphate dehydrogenase;Inosine-5'-monophosphate dehydrogenase;Inosine-5'-monophosphate dehydrogenase 1	0.214722	13.7157	0.0293309	0.148619	2.58753	-3.91671
Kid. Cortex	Mouse	Pip4p1	Pip4p1	E0CYE6;F8WHW3;Q3TWL2	Phosphatidylinositol-4,5-bisphosphate 4-phosphatase (Fragment);Phosphatidylinositol-4,5-bisphosphate 4-phosphatase;Type 1 phosphatidylinositol 4,5-bisphosphate 4-phosphatase	0.0499068	11.6658	0.704259	0.848882	0.391888	-6.55174
Kid. Cortex	Mouse	Maf1	Maf1	E0CYF5;E0CYK4;Q9D0U6	Repressor of RNA polymerase III transcription MAF1;Repressor of RNA polymerase III transcription MAF1 homolog (Fragment);Repressor of RNA polymerase III transcription MAF1 homolog	-0.404349	11.46	0.181702	0.410195	-1.46267	-5.53923
Kid. Cortex	Mouse	Cntrl	Cntrl	A0A0G2JE96;A2AL36;A2AS42;E9Q9E7;F6QP53;R4GML3;R4GML4	Centriolin (Fragment);Centriolin;Centriolin;Centriolin;Centriolin (Fragment);Centriolin;Centriolin (Fragment)	1.32451	7.46937	0.339695	0.575003	1.0082	-6.10941
Kid. Cortex	Mouse	Wtap	Wtap	E0CYH0;Q9ER69	Pre-mRNA-splicing regulator WTAP	0.00845749	11.1773	0.94483	0.973849	0.0711551	-6.63213
Kid. Cortex	Mouse	Wdr26	Wdr26	E0CYH4	WD repeat domain 26 (Fragment)	0.279869	11.4769	0.00499601	0.0568222	3.69012	-2.1538
Kid. Cortex	Mouse	Filip1l	Filip1l	E0CYH7;E0CYM1;Q6P6L0	Filamin A interacting protein 1-like;Filamin A interacting protein 1-like;Filamin A-interacting protein 1-like	0.294455	10.9123	0.139733	0.356857	1.61977	-5.3804
Kid. Cortex	Mouse	Ciart	Ciart	E0CYK0;F6U6T6;Q3TQ03	Circadian associated repressor of transcription (Fragment);Circadian associated repressor of transcription (Fragment);Circadian-associated transcriptional repressor	-0.365289	8.20732	0.0622884	0.224875	-2.39123	-4.15058
Kid. Cortex	Mouse	Nhsl1	Nhsl1	E0CYL9	NHS-like 1 (Fragment)	0.0616034	8.95002	0.682796	0.836053	0.422185	-6.53852
Kid. Cortex	Mouse	Wnk2	Wnk2	E0CYT1;E9Q6Q2;E9QJQ9;E9QM73;E9QMI8;E9QMI9;Q3UH66	non-specific serine/threonine protein kinase;non-specific serine/threonine protein kinase;non-specific serine/threonine protein kinase;non-specific serine/threonine protein kinase;non-specific serine/threonine protein kinase;non-specific serine/threonine protein kinase;Serine/threonine-protein kinase WNK2	0.10393	8.92957	0.395264	0.627458	0.89269	-6.21817
Kid. Cortex	Mouse	Znrd2	Znrd2	E0CYU9;P56873	Zinc ribbon domain containing 2;Protein ZNRD2	0.0598487	11.6563	0.72225	0.859178	0.36679	-6.56197
Kid. Cortex	Mouse	Pcmt1	Pcmt1	E0CYV0;E9PWE0;F7D432;P23506	Protein-L-isoaspartate O-methyltransferase;Protein-L-isoaspartate O-methyltransferase;Protein-L-isoaspartate O-methyltransferase (Fragment);Protein-L-isoaspartate(D-aspartate) O-methyltransferase	-0.163671	13.1992	0.118816	0.325413	-1.72389	-5.23609
Kid. Cortex	Mouse	Ccdc127	Ccdc127	E0CYX9;Q3TC33	Coiled-coil domain containing 127 (Fragment);Coiled-coil domain-containing protein 127	-0.25124	12.7898	0.0216937	0.126538	-2.77166	-3.62099
Kid. Cortex	Mouse	Klhl3	Klhl3	E0CZ16	Kelch-like protein 3	-0.248674	10.3174	0.127045	0.336351	-1.68108	-5.29599
Kid. Cortex	Mouse	Iglc1	Iglc1;	A0A0G2JE99;P01843	Immunoglobulin lambda constant 1 (Fragment);Ig lambda-1 chain C region	1.3359	9.59922	0.0424543	0.181449	2.56786	-3.89559
Kid. Cortex	Mouse	Mroh1	Mroh1	E0CZ22	Maestro heat-like repeat family member 1	0.0222543	12.9621	0.742463	0.870621	0.338893	-6.57257
Kid. Cortex	Mouse	Myl1	Myl1	E0CZ30;E9PWG4;P05977	Myosin, light polypeptide 1 (Fragment);Myosin, light polypeptide 1;Myosin light chain 1/3, skeletal muscle isoform	0.94599	9.22375	0.102822	0.300059	2.10708	-4.47936
Kid. Cortex	Mouse	Kif2a	Kif2a	E0CZ72;P28740	Kinesin-like protein;Kinesin-like protein KIF2A	0.137889	11.6559	0.0759307	0.252159	2.00505	-4.82613
Kid. Cortex	Mouse	Ppp3cb	Ppp3cb	E0CZ78;P48453	Serine/threonine-protein phosphatase;Serine/threonine-protein phosphatase 2B catalytic subunit beta isoform	0.206043	13.3381	0.0113355	0.0880509	3.17164	-2.97686
Kid. Cortex	Mouse	Nae1	Nae1	E0CZE0;Q8VBW6	NEDD8-activating enzyme E1 regulatory subunit	0.0271956	12.9362	0.66693	0.82724	0.444855	-6.528
Kid. Cortex	Mouse	Rpgrip1	Rpgrip1	E7CHD7;M0QWI1;Q9EPQ2	RPGRIP1 variant-11aa;Retinitis pigmentosa GTPase regulator interacting protein 1 (Fragment);X-linked retinitis pigmentosa GTPase regulator-interacting protein 1	-0.0586158	12.441	0.902482	0.953715	-0.127039	-6.49863
Kid. Cortex	Mouse	Urb1	Urb1	E9PU96;Q571H0	URB1 ribosome biogenesis 1 homolog (S. cerevisiae);Nucleolar pre-ribosomal-associated protein 1	0.243535	11.9474	0.0290771	0.147962	2.59283	-3.90823
Kid. Cortex	Mouse	Tut7	Tut7	E9PUA2;Q5BLK4	RNA uridylyltransferase;Terminal uridylyltransferase 7	0.193467	11.8195	0.0195992	0.120283	2.83381	-3.52087
Kid. Cortex	Mouse	Kifc5b	Kifc5b;Kifc1	E9PUA5;Q9QWT9	Kinesin-like protein;Kinesin-like protein KIFC1	0.308036	11.9012	0.0106577	0.084949	3.3125	-2.81143
Kid. Cortex	Mouse	Kctd9	Kctd9	E9PUA6;Q80UN1	Potassium channel tetramerisation domain containing 9;BTB/POZ domain-containing protein KCTD9	0.0829634	9.30508	0.539911	0.749242	0.637121	-6.41813
Kid. Cortex	Mouse	Ighv1-12	Ighv1-12	A0A075B5U0	Immunoglobulin heavy variable V1-12		10.5525
Kid. Cortex	Mouse	Gm43738	Gm43738	A0A0G2JEA5	Predicted gene 43738	0.260753	10.964	0.396293	0.628285	0.890665	-6.21998
Kid. Cortex	Mouse	Msto1	Msto1	E9PUB7;Q2YDW2	Protein misato homolog 1	0.122118	11.3791	0.129796	0.340232	1.66733	-5.31506
Kid. Cortex	Mouse	Dnm1l	Dnm1l	E9PUD2	Dynamin 1-like	-0.163714	11.8269	0.291662	0.528586	-1.12012	-5.99413
Kid. Cortex	Mouse	R3hcc1	R3hcc1	E9PUE1;Q8BSI6	R3H and coiled-coil domain-containing protein 1	0.0651844	10.1134	0.511081	0.726993	0.684198	-6.38576
Kid. Cortex	Mouse	Arhgef1	Arhgef1	E9PUF7;Q61210	Rho guanine nucleotide exchange factor (GEF) 1;Rho guanine nucleotide exchange factor 1	0.19132	12.6543	0.0302898	0.151161	2.56792	-3.94809
Kid. Cortex	Mouse	Crls1	Crls1	E9PUH6;E9PUW6;Q80ZM8	Cardiolipin synthase 1 (Fragment);Cardiolipin synthase 1;Cardiolipin synthase (CMP-forming)	-0.171661	10.697	0.515817	0.730154	-0.676357	-6.3913
Kid. Cortex	Mouse	Nfix	Nfix	E9PUH7	Nuclear factor 1	0.0978608	11.3683	0.456324	0.681994	0.778372	-6.31484
Kid. Cortex	Mouse	Fnbp1l	Fnbp1l	E9PUK3	Formin-binding protein 1-like	-0.0273628	12.9374	0.753527	0.875624	-0.323745	-6.57799
Kid. Cortex	Mouse	Pde8b	Pde8b	E9PUL4;E9PX38;E9PXX4;E9PYP0;E9Q4S1;E9Q8J6	Phosphodiesterase;Phosphodiesterase;Phosphodiesterase;Phosphodiesterase;High affinity cAMP-specific and IBMX-insensitive 3',5'-cyclic phosphodiesterase 8B;Phosphodiesterase	0.125118	9.65197	0.353473	0.58788	0.978331	-6.13856
Kid. Cortex	Mouse	Nat8f1	Nat8f1	E9PUL7	N-acetyltransferase 8 (GCN5-related) family member 1	-0.302176	10.9116	0.257729	0.495445	-1.23198	-5.65622
Kid. Cortex	Mouse	Cfhr4	Cfhr4	E9PUM5;E9Q8B5;E9Q8B6	Complement factor H-related 4	-0.131572	12.2366	0.656795	0.822068	-0.459467	-6.52095
Kid. Cortex	Mouse	Sh3glb1	Sh3glb1	A0A0G2JEC4;Q9JK48	Endophilin-B1	0.1602	12.9602	0.116219	0.321348	1.73797	-5.21623
Kid. Cortex	Mouse	Ror2	Ror2	E9PUN5;Q8C3W2;Q9Z138	Receptor tyrosine kinase-like orphan receptor 2;Receptor tyrosine kinase-like orphan receptor 2;Tyrosine-protein kinase transmembrane receptor ROR2	0.166899	10.34	0.549255	0.754881	0.625196	-6.37262
Kid. Cortex	Mouse	Adamts9	Adamts9	E9PUN6;E9PYV8	A disintegrin-like and metallopeptidase (reprolysin type) with thrombospondin type 1 motif, 9;A disintegrin-like and metallopeptidase (reprolysin type) with thrombospondin type 1 motif, 9	-0.514675	11.092	0.52628	0.738187	-0.680729	-6.07664
Kid. Cortex	Mouse	Trmt2a	Trmt2a	E9PUQ7;Q8BNV1	tRNA (uracil(54)-C(5))-methyltransferase;tRNA (uracil-5-)-methyltransferase homolog A	0.279111	11.4845	0.0198147	0.120785	2.82711	-3.53166
Kid. Cortex	Mouse	Dgkd	Dgkd	E9PUQ8	Diacylglycerol kinase delta	-0.0640037	10.689	0.532494	0.742967	-0.649086	-6.4101
Kid. Cortex	Mouse	Ankhd1	Ankhd1	E9PUR0;E9Q1M6	Ankyrin repeat and KH domain containing 1	0.017887	12.2764	0.814589	0.910074	0.241488	-6.60315
Kid. Cortex	Mouse	Card10	Card10	E9PUV9;P58660	Caspase recruitment domain family, member 10;Caspase recruitment domain-containing protein 10	-0.0095944	10.0723	0.952122	0.976927	-0.0617361	-6.63281
Kid. Cortex	Mouse	Mrps12	Mrps12	E9PUY1;O35680	Mitochondrial ribosomal protein S12 (Fragment);28S ribosomal protein S12, mitochondrial	0.670475	11.4328	0.121733	0.329615	1.70841	-5.25784
Kid. Cortex	Mouse	Cul5	Cul5	E9PV12;G3X914;Q9D5V5	Cullin 5;Cullin 5;Cullin-5	-0.0264326	13.4291	0.647601	0.816224	-0.472814	-6.51432
Kid. Cortex	Mouse	Fga	Fga	E9PV24	Fibrinogen alpha chain	1.36952	13.5517	0.00269997	0.0401487	4.09415	-1.53152
Kid. Cortex	Mouse	Ces2g	Ces2g	E9PV38	Carboxylic ester hydrolase	-0.361515	10.9789	0.18853	0.417587	-1.42275	-5.63953
Kid. Cortex	Mouse	Ubap2l	Ubap2l	A0A0G2JEC6	Ubiquitin-associated protein 2-like (Fragment)	0.658954	11.2464	0.151422	0.37131	1.58589	-5.37946
Kid. Cortex	Mouse	Diaph1	Diaph1	E9PV41;E9PXV7;O08808	Diaphanous related formin 1;Diaphanous related formin 1;Protein diaphanous homolog 1	0.174494	12.8609	0.225299	0.460009	1.30185	-5.78813
Kid. Cortex	Mouse	Atpif1	Atpif1	E9PV44	ATP synthase F1 subunit epsilon	0.0585033	16.2089	0.75159	0.875294	0.326391	-6.57706
Kid. Cortex	Mouse	Ifit3b	Ifit3b;Ifit3	E9PV48;Q64345	Interferon-induced protein with tetratricopeptide repeats 3B;Interferon-induced protein with tetratricopeptide repeats 3	0.533459	11.4631	0.00117515	0.0264783	4.66595	-0.688556
Kid. Cortex	Mouse	Nabp2	Nabp2	E9PV68;E9Q199;E9Q1I2;Q8R2Y9	Nucleic acid binding protein 2 (Fragment);Nucleic acid binding protein 2;Nucleic acid binding protein 2 (Fragment);SOSS complex subunit B1	0.111936	10.6139	0.622801	0.800961	0.509288	-6.49527
Kid. Cortex	Mouse	Ncoa2	Ncoa2	E9PV80;Q61026	Nuclear receptor coactivator;Nuclear receptor coactivator 2	-0.0857328	10.3846	0.4258	0.656349	-0.834113	-6.26912
Kid. Cortex	Mouse	Rrp8	Rrp8	E9PVA2;Q9DB85	Ribosomal RNA-processing protein 8	0.183034	10.2046	0.149481	0.368999	1.57599	-5.43965
Kid. Cortex	Mouse	Git2	Git2	E9PVA6	GIT ArfGAP 2	0.192015	11.9414	0.0326024	0.158989	2.52308	-4.01971
Kid. Cortex	Mouse	Gcn1	Gcn1	E9PVA8	eIF-2-alpha kinase activator GCN1	0.0257442	13.6902	0.715326	0.854786	0.376418	-6.55812
Kid. Cortex	Mouse	Eif4g1	Eif4g1	E9PVC5;E9PVC6;E9Q9E1;Q6NZJ6	Eukaryotic translation initiation factor 4, gamma 1;Eukaryotic translation initiation factor 4, gamma 1;Eukaryotic translation initiation factor 4, gamma 1;Eukaryotic translation initiation factor 4 gamma 1	0.0177758	13.8884	0.855806	0.930986	0.187003	-6.61583
Kid. Cortex	Mouse	Cdk14	Cdk14	E9PVC7;O35495	Cyclin-dependent kinase 14	-0.299667	8.5504	0.206267	0.439805	-1.39296	-5.55311
Kid. Cortex	Mouse	Mvk	Mvk	A0A0G2JEG0;A0A0G2JFX8;D3YV77;Q3UEB4;Q9R008	mevalonate kinase;mevalonate kinase;mevalonate kinase (Fragment);Mevalonate kinase;Mevalonate kinase	-0.0249116	11.2559	0.892316	0.948743	-0.139253	-6.62432
Kid. Cortex	Mouse	Dchs1	Dchs1	E9PVD3	Protocadherin-16	0.290654	9.56186	0.0436693	0.184737	2.34487	-4.30222
Kid. Cortex	Mouse	Cftr	Cftr	E9PVD7;P26361	Cystic fibrosis transmembrane conductance regulator	0.344686	9.48779	0.0452637	0.18836	2.32297	-4.33664
Kid. Cortex	Mouse	C1qtnf7	C1qtnf7	E9PVG1;Q8BVD7	C1q and tumor necrosis factor related protein 7;Complement C1q tumor necrosis factor-related protein 7	0.089816	9.74177	0.768025	0.884491	0.304018	-6.58468
Kid. Cortex	Mouse	Ttc21b	Ttc21b	E9PVK4;Q0HA38	Tetratricopeptide repeat domain 21B;Tetratricopeptide repeat protein 21B	0.0329849	11.1739	0.70409	0.848882	0.392124	-6.55164
Kid. Cortex	Mouse	Inpp4b	Inpp4b	E9PVM1;E9PVM3;F8WJC1;Q6P1Y8	phosphatidylinositol-3,4-bisphosphate 4-phosphatase;phosphatidylinositol-3,4-bisphosphate 4-phosphatase;Inositol polyphosphate-4-phosphatase, type II;Type II inositol 3,4-bisphosphate 4-phosphatase	0.199185	9.90053	0.00916709	0.078011	3.30424	-2.76442
Kid. Cortex	Mouse	Gm20498	Gm20498	E9PVN6	Cytochrome c oxidase assembly protein COX16 homolog, mitochondrial	-0.217287	12.4203	0.00873236	0.0757766	-3.33474	-2.71571
Kid. Cortex	Mouse	Stard10	Stard10	E9PVP0	START domain containing 10	0.0562712	8.87507	0.708834	0.851214	0.387018	-6.46972
Kid. Cortex	Mouse	Spats2l	Spats2l	E9PVQ3;E9PZE9;E9Q5S6;E9Q7S4;Q91WJ7	Spermatogenesis associated, serine-rich 2-like;Spermatogenesis associated, serine-rich 2-like;Spermatogenesis associated, serine-rich 2-like (Fragment);Spermatogenesis associated, serine-rich 2-like;SPATS2-like protein	-0.0901449	10.3582	0.453893	0.679829	-0.782718	-6.31137
Kid. Cortex	Mouse	Tead1	Tead1	E9PVS2;E9PZ73;E9Q387;F6QIG2;F6TBI7;F6ZIM6;F7B3M8;P30051;Q3UFP5;Q3USK5;Q6PAQ8	TEA domain family member 1;TEA domain family member 1;TEA domain family member 1;TEA domain family member 1;TEA domain family member 1;TEA domain family member 1;TEA domain family member 1;Transcriptional enhancer factor TEF-1;TEA domain family member 1;TEA domain family member 1;TEA domain family member 1	0.142874	9.82477	0.315438	0.552857	1.07094	-5.99236
Kid. Cortex	Mouse	Immt	Immt	E9PVS5	MICOS complex subunit MIC60 (Fragment)	-0.338418	12.0972	0.0107921	0.0853384	-3.20222	-2.92777
Kid. Cortex	Mouse	Slc35f6	Slc35f6	A0A0G2JEG3;Q8VE96	Solute carrier family 35, member F6;Solute carrier family 35 member F6	-0.184271	10.6022	0.225216	0.460009	-1.3021	-5.78783
Kid. Cortex	Mouse	Gm3286	Gm3286	E9PVT6	Predicted gene 3286	1.08239	12.737	0.0093738	0.0790272	5.97607	-1.9332
Kid. Cortex	Mouse	Myo6	Myo6	E9PVU0	Unconventional myosin-VI	-0.394594	13.0242	0.00037686	0.0158231	-5.50666	0.461074
Kid. Cortex	Mouse	Mki67	Mki67	E9PVX6	Proliferation marker protein Ki-67	0.956698	8.99922	0.000979928	0.0240127	4.79535	-0.504519
Kid. Cortex	Mouse	Golgb1	Golgb1	E9PVZ8	Golgi autoantigen, golgin subfamily b, macrogolgin 1	0.059775	12.4156	0.363073	0.596233	0.95803	-6.15797
Kid. Cortex	Mouse	Suz12	Suz12	E9PW15;Q80U70	SUZ12 polycomb repressive complex 2 subunit;Polycomb protein Suz12	0.0421368	9.46552	0.726443	0.861538	0.360979	-6.56425
Kid. Cortex	Mouse	Chtop	Chtop	E9PW20;Q9CY57	Chromatin target of PRMT1;Chromatin target of PRMT1 protein	0.124375	10.373	0.379337	0.6107	0.924517	-6.18929
Kid. Cortex	Mouse	Csnk1a1	Csnk1a1	E9PWB2;E9Q4G7;H7BXB1;Q8BK63	Casein kinase 1, alpha 1;Casein kinase 1, alpha 1;Casein kinase 1, alpha 1;Casein kinase I isoform alpha	0.166449	12.9891	0.149719	0.369394	1.57495	-5.44104
Kid. Cortex	Mouse	Papola	Papola	E9PWC8;E9PZR3;Q61183	Poly(A) polymerase;Poly(A) polymerase;Poly(A) polymerase alpha	0.17461	11.9427	0.066697	0.233452	2.08522	-4.70482
Kid. Cortex	Mouse	Thsd7a	Thsd7a	E9PWD2;E9QNR5;Q69ZU6	Thrombospondin, type I, domain containing 7A;Thrombospondin, type I, domain containing 7A;Thrombospondin type-1 domain-containing protein 7A	-0.579044	12.0144	0.00262812	0.0396338	-4.1122	-1.50421
Kid. Cortex	Mouse	Polrmt	Polrmt	E9PWD9;Q8BKF1	DNA-directed RNA polymerase;DNA-directed RNA polymerase, mitochondrial	-0.239408	11.5085	0.0876181	0.273262	-1.91597	-4.95883
Kid. Cortex	Mouse	Rpf1	Rpf1	A0A0G2JEG7;Q7TND5	Ribosome production factor 1 homolog (Fragment);Ribosome production factor 1	-0.258253	9.78536	0.208824	0.442486	-1.35377	-5.72537
Kid. Cortex	Mouse	Dpysl3	Dpysl3	E9PWE8	Dihydropyrimidinase-like 3	0.980435	13.112	6.73988e-05	0.00764735	6.94237	2.17808
Kid. Cortex	Mouse	Ncapg	Ncapg	E9PWG6	Non-SMC condensin I complex, subunit G	1.60714	8.06132	0.00037467	0.0158231	5.86873	0.576637
Kid. Cortex	Mouse	Map3k5	Map3k5	E9PWG9;O35099	mitogen-activated protein kinase kinase kinase;Mitogen-activated protein kinase kinase kinase 5	0.0249223	11.8057	0.77691	0.890223	0.291994	-6.58855
Kid. Cortex	Mouse	Apbb2	Apbb2	E9PWH3;Q3TDW6	Amyloid beta (A4) precursor protein-binding, family B, member 2;Amyloid beta (A4) precursor protein-binding, family B, member 2	0.243022	8.39794	0.489775	0.71043	0.728811	-6.2217
Kid. Cortex	Mouse	Mcc	Mcc	E9PWI3;G3UW40	Mutated in colorectal cancers	0.0181399	9.75734	0.909664	0.956907	0.116695	-6.62746
Kid. Cortex	Mouse	Gcc2	Gcc2	E9PWI6;Q8CHG3	GRIP and coiled-coil domain containing 2;GRIP and coiled-coil domain-containing protein 2	0.0741494	11.8082	0.249357	0.487712	1.23146	-5.87053
Kid. Cortex	Mouse	Lpin2	Lpin2	E9PWN0;Q99PI5	phosphatidate phosphatase;Phosphatidate phosphatase LPIN2	0.304424	9.01238	0.0626655	0.225626	2.12363	-4.64613
Kid. Cortex	Mouse	Col6a3	Col6a3	E9PWQ3	Collagen, type VI, alpha 3	-0.006165	15.3827	0.959062	0.980249	-0.0527778	-6.63337
Kid. Cortex	Mouse	Stk31	Stk31	E9PWQ6;E9Q260;Q99MW1	Serine threonine kinase 31;Serine threonine kinase 31;Serine/threonine-protein kinase 31	0.417254	11.7501	0.0604554	0.221042	2.14571	-4.61224
Kid. Cortex	Mouse	Evi5	Evi5	E9PWR7	Ecotropic viral integration site 5 (Fragment)	-0.0892087	12.1405	0.220246	0.454907	-1.31742	-5.76947
Kid. Cortex	Mouse	Tmem243	Tmem243	A0A0G2JEH3;B2RVB9	Transmembrane protein 243, mitochondrial;Transmembrane protein 243, mitochondrial	1.08987	10.0867	0.351345	0.585517	1.01029	-5.85179
Kid. Cortex	Mouse	Adipoq	Adipoq	E9PWU4;Q60994	Adiponectin, C1Q and collagen domain containing (Fragment);Adiponectin	0.124558	11.6037	0.834513	0.921416	0.215841	-6.55752
Kid. Cortex	Mouse	Kifc3	Kifc3	E9PWU7;O35231	Kinesin-like protein;Kinesin-like protein KIFC3	-0.188111	10.8069	0.0314775	0.154645	-2.54448	-3.98555
Kid. Cortex	Mouse	Rps6ka1	Rps6ka1	E9PWV3;F6Q8A4;F6RQA2;P18653;Q505N6	Ribosomal protein S6 kinase;non-specific serine/threonine protein kinase (Fragment);Ribosomal protein S6 kinase;Ribosomal protein S6 kinase alpha-1;Ribosomal protein S6 kinase	0.133917	13.2754	0.212649	0.446894	1.34142	-5.74045
Kid. Cortex	Mouse	Gtpbp3	Gtpbp3	E9PWV7;Q923K4	GTP binding protein 3;tRNA modification GTPase GTPBP3, mitochondrial	-0.256778	11.2111	0.081116	0.261618	-1.96403	-4.88753
Kid. Cortex	Mouse	Tor1aip1	Tor1aip1	E9PWW2	Torsin A interacting protein 1	0.650896	9.15057	0.148798	0.367973	1.656	-5.11194
Kid. Cortex	Mouse	Adamtsl1	Adamtsl1	E9PWW5;Q8BLI0	ADAMTS-like 1;ADAMTS-like protein 1	0.247598	8.76295	0.188697	0.417859	1.45612	-5.47562
Kid. Cortex	Mouse	Zc3h7a	Zc3h7a	E9PWW6	Zinc finger CCCH type containing 7 A	0.200186	10.5938	0.234246	0.471085	1.27497	-5.81996
Kid. Cortex	Mouse	Rsf1	Rsf1	E9PWW9	Remodeling and spacing factor 1	-0.0975714	10.8849	0.253075	0.491235	-1.22109	-5.8824
Kid. Cortex	Mouse	Farsa	Farsa	E9PWY9;Q8C0C7	Phenylalanine--tRNA ligase alpha subunit	-0.0647456	14.1529	0.508838	0.725093	-0.687927	-6.38311
Kid. Cortex	Mouse	Lyrm9	Lyrm9	E9PX24;Q3UN90	LYR motif-containing protein 9 (Fragment);LYR motif-containing protein 9	0.275168	11.3861	0.316209	0.553497	1.09327	-5.55302
Kid. Cortex	Mouse	Zbtb41	Zbtb41	A0A0G2JEJ7;Q811F1	Zinc finger and BTB domain containing 41 (Fragment);Zinc finger and BTB domain-containing protein 41	-0.149665	8.178	0.211004	0.445126	-1.3597	-5.66704
Kid. Cortex	Mouse	Map4k5	Map4k5	E9PX30;Q8BPM2	Mitogen-activated protein kinase kinase kinase kinase 5	0.0641139	11.264	0.41827	0.648321	0.848281	-6.25706
Kid. Cortex	Mouse	Ppp4r1	Ppp4r1	E9PX53;E9QPR5;Q8K2V1	Protein phosphatase 4, regulatory subunit 1;Protein phosphatase 4, regulatory subunit 1;Serine/threonine-protein phosphatase 4 regulatory subunit 1	0.0375194	11.7474	0.592335	0.780958	0.555126	-6.46945
Kid. Cortex	Mouse	Samd9l	Samd9l	E9PX59;Q69Z37	Sterile alpha motif domain containing 9-like;Sterile alpha motif domain-containing protein 9-like	0.0868432	13.667	0.612087	0.793998	0.525272	-6.48651
Kid. Cortex	Mouse	Hdac7	Hdac7	E9PX62;E9PXW8;Q8C2B3	Histone deacetylase;Histone deacetylase;Histone deacetylase 7	0.428319	10.4418	0.0006233	0.0197276	5.12544	-0.0466857
Kid. Cortex	Mouse	Slc4a1ap	Slc4a1ap	E9PX68;E9Q585	Solute carrier family 4 (anion exchanger), member 1, adaptor protein;Solute carrier family 4 (anion exchanger), member 1, adaptor protein	0.0179033	11.3942	0.847536	0.926573	0.19788	-6.61356
Kid. Cortex	Mouse	Bola3	Bola3	E9PX89;E9Q705;Q8CEI1	BolA-like 3 (E. coli);BolA-like 3 (E. coli);BolA-like protein 3	-1.09092	11.6586	0.0679656	0.236675	-2.07359	-4.72251
Kid. Cortex	Mouse	Tmem139	Tmem139	E9PX92	Transmembrane protein 139	-0.282108	11.5874	0.0707016	0.242919	-2.08373	-4.64902
Kid. Cortex	Mouse	Usf2	Usf2	E9PXC2;F6PWU6;F8WI12;Q64705	Upstream transcription factor 2;Upstream transcription factor 2 (Fragment);Upstream transcription factor 2;Upstream stimulatory factor 2	0.132853	9.96239	0.460413	0.685441	0.771097	-6.32061
Kid. Cortex	Mouse	Pcdh17	Pcdh17	E9PXF0	Protocadherin 17	-0.370182	10.2944	0.00317839	0.0441592	-3.98562	-1.69669
Kid. Cortex	Mouse	Sbf2	Sbf2	E9PXF8;E9Q0D4	Myotubularin-related protein 13;SET binding factor 2	0.160763	12.2607	0.124854	0.334291	1.69222	-5.28047
Kid. Cortex	Mouse	Crip1	Crip1	A0A0G2JEK2;P63254	Cysteine-rich protein 1 (intestinal);Cysteine-rich protein 1	1.10131	13.8298	0.0160986	0.107373	2.95463	-3.32612
Kid. Cortex	Mouse	Vav1	Vav1	E9PXI0;P27870	Vav 1 oncogene;Proto-oncogene vav	0.903011	11.137	0.000647477	0.019953	5.09723	-0.0851556
Kid. Cortex	Mouse	Pex11b	Pex11b	E9PXK7;Q9Z210	Peroxisomal biogenesis factor 11 beta;Peroxisomal membrane protein 11B	-0.0254617	12.4167	0.891382	0.948743	-0.14047	-6.62413
Kid. Cortex	Mouse	Ugt1a10	Ugt1a10	E9PXN7	UDP-glucuronosyltransferase	-0.11076	16.4161	0.543815	0.752191	-0.630864	-6.42228
Kid. Cortex	Mouse	Ston2	Ston2	E9PXP7;Q8BZ60	Stonin-2	-0.130065	10.3797	0.4715	0.694824	-0.751577	-6.33584
Kid. Cortex	Mouse	Sesn1	Sesn1	E9PXR3;P58006	Sestrin 1;Sestrin-1	-0.0483877	8.64419	0.841119	0.924551	-0.206337	-6.6117
Kid. Cortex	Mouse	Rab40c	Rab40c	E9PXR4;E9Q016;Q8VHQ4	Rab40C, member RAS oncogene family (Fragment);Rab40C, member RAS oncogene family;Ras-related protein Rab-40C	0.0890978	9.59562	0.565211	0.764938	0.599839	-6.38898
Kid. Cortex	Mouse	Sytl3	Sytl3	E9PXV1;Q99N48	Synaptotagmin-like 3;Synaptotagmin-like protein 3	1.79264	10.3123	0.107425	0.308115	2.27491	-4.22613
Kid. Cortex	Mouse	Slc28a1	Slc28a1	E9PXX9	Sodium/nucleoside cotransporter 1	-0.361008	11.5696	0.0280355	0.145458	-2.61507	-3.8726
Kid. Cortex	Mouse	Tstd1	Tstd1	E9PY03	Thiosulfate sulfurtransferase (rhodanese)-like domain containing 1	-0.248142	11.2646	0.205625	0.439184	-1.36425	-5.7125
Kid. Cortex	Mouse	Adap1	Adap1	E9PY16	ArfGAP with dual PH domains 1	0.327501	11.2899	0.004913	0.0563648	3.70094	-2.13689
Kid. Cortex	Mouse	Dhx30	Dhx30	A0A0G2JEN9;A0A0G2JGU3	DEAH (Asp-Glu-Ala-His) box polypeptide 30 (Fragment)	0.276065	9.02147	0.359957	0.593555	0.97106	-6.09168
Kid. Cortex	Mouse	Gpatch2	Gpatch2	E9PY25;M0QWF5;M0QWJ1;Q7TQC7	G patch domain containing 2;G patch domain containing 2;G patch domain containing 2;G patch domain-containing protein 2	-0.195447	10.1755	0.472844	0.695738	-0.749232	-6.33765
Kid. Cortex	Mouse	Btbd2	Btbd2	E9PY28	BTB (POZ) domain containing 2	-0.0209942	11.0103	0.864355	0.935624	-0.175784	-6.61805
Kid. Cortex	Mouse	Gm20431	Gm20431	E9PY39	Predicted gene 20431	0.0511391	15.4179	0.420517	0.650718	0.844034	-6.2607
Kid. Cortex	Mouse	Ncor2	Ncor2	E9PY55;E9Q701;F8VQL9;Q9WU42	Nuclear receptor co-repressor 2;Nuclear receptor co-repressor 2;Nuclear receptor co-repressor 2;Nuclear receptor corepressor 2	0.258619	10.3936	0.038725	0.172391	2.41818	-4.18647
Kid. Cortex	Mouse	Gpr179	Gpr179	E9PY61	G protein-coupled receptor 179	-0.0799381	12.336	0.176056	0.402106	-1.4684	-5.58126
Kid. Cortex	Mouse	Rsl24d1	Rsl24d1	E9PY85;Q99L28	Ribosomal L24 domain containing 1;Probable ribosome biogenesis protein RLP24	-0.15412	11.1415	0.198473	0.429627	-1.3882	-5.68287
Kid. Cortex	Mouse	Fam98c	Fam98c	E9PYD1	Family with sequence similarity 98, member C	-0.078766	12.6568	0.337233	0.572936	-1.01363	-6.10404
Kid. Cortex	Mouse	Lmo7	Lmo7	E9PYF4	LIM domain only 7	-0.109627	13.4433	0.216147	0.450509	-1.33028	-5.75396
Kid. Cortex	Mouse	Ap1ar	Ap1ar	E9PYF7	AP1AR	-0.438375	10.2854	0.04318	0.183318	-2.35175	-4.29139
Kid. Cortex	Mouse	Rasa1	Rasa1	E9PYG6	RAS p21 protein activator 1	0.252173	11.5986	0.0084354	0.0743048	3.3565	-2.681
Kid. Cortex	Mouse	Ighv1-31	Ighv1-31	A0A075B5V1	Immunoglobulin heavy variable 1-31	0.588098	11.2601	0.0359548	0.166544	2.58977	-3.9024
Kid. Cortex	Mouse	Fxr1	Fxr1	A0A0G2JEP0	RNA-binding protein FXR1	-0.158629	9.40217	0.601729	0.788227	-0.540864	-6.47771
Kid. Cortex	Mouse	Acot7	Acot7	E9PYH2;Q91V12	Acyl-CoA thioesterase 7;Cytosolic acyl coenzyme A thioester hydrolase	0.0360792	13.2065	0.818188	0.911958	0.236701	-6.60439
Kid. Cortex	Mouse	Etnppl	Etnppl	E9PYH3;Q8BWU8	Ethanolamine phosphate phospholyase;Ethanolamine-phosphate phospho-lyase	0.000966952	10.202	0.997414	0.998701	0.00333202	-6.63489
Kid. Cortex	Mouse	Setd1a	Setd1a	E9PYH6	Histone-lysine N-methyltransferase SETD1A	0.161803	10.3715	0.107747	0.308591	1.78601	-5.14789
Kid. Cortex	Mouse	Pitpnm2	Pitpnm2	E9PYJ7;Q6ZPQ6	Phosphatidylinositol transfer protein, membrane-associated 2;Membrane-associated phosphatidylinositol transfer protein 2	0.180298	9.28974	0.17058	0.395378	1.48934	-5.55416
Kid. Cortex	Mouse	Unc93b1	Unc93b1	E9PYK0;Q8VCW4	Unc-93 homolog B1, TLR signaling regulator;Protein unc-93 homolog B1	1.28609	9.62327	0.00545056	0.0599772	3.63407	-2.24164
Kid. Cortex	Mouse	Parp4	Parp4	E9PYK3	Protein mono-ADP-ribosyltransferase PARP4	0.262322	11.7844	0.0406727	0.177131	2.38825	-4.23381
Kid. Cortex	Mouse	Prr12	Prr12	E9PYL2	Proline-rich protein 12	0.341049	11.7523	0.00139182	0.0288379	4.54695	-0.860045
Kid. Cortex	Mouse	Cadm1	Cadm1	E9PYN1;Q8R5M8	Cell adhesion molecule 1	0.381354	10.983	0.148879	0.367973	1.57862	-5.43611
Kid. Cortex	Mouse	Zfp346	Zfp346;Znf346	E9PYN2;Q9R0B7	Zinc finger protein 346	0.12075	10.2157	0.297469	0.534133	1.10586	-6.00934
Kid. Cortex	Mouse	Aoc1	Aoc1	E9PYN9;Q8JZQ5	Amine oxidase;Amiloride-sensitive amine oxidase [copper-containing]	0.702084	10.6505	0.119136	0.325821	1.74499	-5.16376
Kid. Cortex	Mouse	Lrrfip2	Lrrfip2	A0A0G2JEP4;A0A1L1SSC0;A0A668KLE1	Leucine rich repeat (in FLII) interacting protein 2	0.00269037	12.5726	0.979941	0.990647	0.0258501	-6.63453
Kid. Cortex	Mouse	Nbeal1	Nbeal1	E9PYP2	Neurobeachin like 1	0.191753	11.573	0.0714354	0.243438	2.04284	-4.76916
Kid. Cortex	Mouse	Fbxl18	Fbxl18	E9PYR1;F8VQK6	F-box and leucine-rich repeat protein 18	-0.00386838	10.4042	0.957042	0.979129	-0.0553848	-6.63322
Kid. Cortex	Mouse	Smurf1	Smurf1	E9PYU8;E9Q4K9;Q9CUN6	E3 ubiquitin-protein ligase;E3 ubiquitin-protein ligase;E3 ubiquitin-protein ligase SMURF1	1.27081e-05	13.549	0.999932	0.999932	8.73784e-05	-6.6349
Kid. Cortex	Mouse	Rnf168	Rnf168	E9PYW4;Q80XJ2	E3 ubiquitin-protein ligase RNF168	-0.403692	8.10743	0.413079	0.643309	-0.858149	-6.24857
Kid. Cortex	Mouse	Mfsd4b5	Mfsd4b5	E9PYY6	Major facilitator superfamily domain containing 4B5	-0.21765	13.752	0.0148061	0.102556	-3.0062	-3.24302
Kid. Cortex	Mouse	Psap	Psap	E9PZ00;J3QPG5;K3W4L3;Q61207;Q8BFQ1	Prosaposin	0.46042	15.3392	0.0228429	0.129439	2.7401	-3.67179
Kid. Cortex	Mouse	Slc26a2	Slc26a2	E9PZ06;Q62273	Solute carrier family 26 (sulfate transporter), member 2 (Fragment);Sulfate transporter	-0.0445262	10.0257	0.636832	0.809502	-0.488566	-6.50626
Kid. Cortex	Mouse	Hspg2	Hspg2	E9PZ16	Perlecan (heparan sulfate proteoglycan 2)	0.192543	16.1037	0.124305	0.333658	1.69505	-5.27653
Kid. Cortex	Mouse	Rbms1	Rbms1	E9PZ21;Q91W59	RNA binding motif, single stranded interacting protein 1;RNA-binding motif, single-stranded-interacting protein 1	-0.0134028	10.3439	0.917595	0.960672	-0.106404	-6.62872
Kid. Cortex	Mouse	Mipol1	Mipol1	E9PZ24;E9Q8Z7;G3UVV8;Q9D9F8	Mirror-image polydactyly 1;Mirror-image polydactyly 1;Mirror-image polydactyly 1;Mirror-image polydactyly gene 1 protein homolog	0.0948268	9.35971	0.703651	0.848882	0.39274	-6.55138
Kid. Cortex	Mouse	Enam	Enam	A0A0G2JEP7;O55196	Enamelin	1.0835	8.75089	0.17907	0.406942	1.49301	-5.42954
Kid. Cortex	Mouse	Pkhd1	Pkhd1	E9PZ36	Fibrocystin	0.012958	10.6494	0.909379	0.956866	0.117066	-6.62742
Kid. Cortex	Mouse	Ttc16	Ttc16	E9PZ84;Q3TV33;Q3V0B6;Q8C1F5	Tetratricopeptide repeat domain 16;Tetratricopeptide repeat domain 16;Tetratricopeptide repeat domain 16;Tetratricopeptide repeat protein 16	0.0484168	14.0314	0.841644	0.924551	0.205646	-6.61185
Kid. Cortex	Mouse	Man2c1	Man2c1	E9PZ88;F8WIE1;Q91W89	alpha-mannosidase;alpha-mannosidase;Alpha-mannosidase 2C1	0.042652	12.5476	0.47851	0.701208	0.73939	-6.34518
Kid. Cortex	Mouse	Fhit	Fhit	E9PZ91	Bis(5'-adenosyl)-triphosphatase	-0.371526	13.3847	0.00301584	0.0425837	-4.02042	-1.64355
Kid. Cortex	Mouse	Pnpla2	Pnpla2	E9PZA4;Q8BJ56	Patatin-like phospholipase domain containing 2 (Fragment);Patatin-like phospholipase domain-containing protein 2	0.107265	10.1466	0.651794	0.818802	0.466716	-6.51737
Kid. Cortex	Mouse	Znrf1	Znrf1	E9PZB7;G3UWW9;G3UWY5;Q91V17	Zinc and ring finger 1;Zinc and ring finger 1 (Fragment);Zinc and ring finger 1 (Fragment);E3 ubiquitin-protein ligase ZNRF1	0.281469	9.85238	0.194164	0.424445	1.43592	-5.5006
Kid. Cortex	Mouse	Micall2	Micall2	E9PZD2;Q3TN34	MICAL-like 2;MICAL-like protein 2	0.951827	10.6329	0.000148925	0.011573	6.25381	1.39196
Kid. Cortex	Mouse	Cp	Cp	E9PZD8;G3X8Q5;G3X9T8;Q61147	Ceruloplasmin	1.07988	13.0114	2.83901e-05	0.00487834	7.75351	3.02297
Kid. Cortex	Mouse	Gm20390	Gm20390	E9PZF0	Nucleoside diphosphate kinase	-0.0554535	16.9247	0.525779	0.738003	-0.660004	-6.40266
Kid. Cortex	Mouse	Katna1	Katna1	E9PZI6;E9QKG2;Q9WV86	Katanin p60 ATPase-containing subunit A1	0.0422372	10.2832	0.763565	0.881591	0.310073	-6.58267
Kid. Cortex	Mouse	Kcnt1	Kcnt1	A0A0G2JER3;A0A0G2JG99	Potassium channel, subfamily T, member 1;Potassium channel, subfamily T, member 1	-0.26912	6.77169	0.390089	0.621625	-0.940606	-5.86153
Kid. Cortex	Mouse	Irf9	Irf9	E9PZJ2;E9Q8M6;Q61179	Interferon regulatory factor 9	2.26552	8.90573	0.235994	0.472614	1.29622	-5.668
Kid. Cortex	Mouse	Golm2	Golm2	E9PZJ6;Q6P2L7	Golgi membrane protein 2;Protein GOLM2	-0.159932	12.0271	0.0794161	0.258421	-1.97719	-4.86788
Kid. Cortex	Mouse	Ascc3	Ascc3	E9PZJ8	Activating signal cointegrator 1 complex subunit 3	0.15909	11.8649	0.0297111	0.149988	2.57968	-3.92928
Kid. Cortex	Mouse	Arfrp1	Arfrp1	E9PZK7;Q8BXL7	ADP-ribosylation factor related protein 1;ADP-ribosylation factor-related protein 1	0.0269469	11.1923	0.863541	0.935167	0.176852	-6.61784
Kid. Cortex	Mouse	Uvssa	Uvssa	E9PZL9;Q9D479	UV-stimulated scaffold protein A	0.0305213	8.91329	0.902966	0.954015	0.125396	-6.62632
Kid. Cortex	Mouse	Chd2	Chd2	E9PZM4	Chromodomain-helicase-DNA-binding protein 2	0.266171	10.4141	0.0481741	0.19504	2.28489	-4.39632
Kid. Cortex	Mouse	Scaf11	Scaf11	E9PZM7	SR-related CTD-associated factor 11	-0.0075227	11.24	0.958076	0.979699	-0.0540496	-6.6333
Kid. Cortex	Mouse	Herc1	Herc1	E9PZP8	HECT and RLD domain containing E3 ubiquitin protein ligase family member 1	-0.0177953	10.5731	0.761001	0.879804	-0.313558	-6.58149
Kid. Cortex	Mouse	Cox7a2l	Cox7a2l	E9PZS8;Q61387	Cytochrome c oxidase subunit 7A2 like;Cytochrome c oxidase subunit 7A-related protein, mitochondrial	-0.331072	12.9122	0.0141466	0.100043	-3.03432	-3.19771
Kid. Cortex	Mouse	Arel1	Arel1	E9PZX5;Q8CHG5	Apoptosis resistant E3 ubiquitin protein ligase 1;Apoptosis-resistant E3 ubiquitin protein ligase 1	0.208559	9.06801	0.550134	0.755225	0.623789	-6.34216
Kid. Cortex	Mouse	Cenpa	Cenpa	A0A0G2JEV2;A0A0G2JGI2;O35216	Centromere protein A;Centromere protein A (Fragment);Histone H3-like centromeric protein A	0.138075	11.9395	0.262023	0.499469	1.19662	-5.91011
Kid. Cortex	Mouse	C2cd5	C2cd5	E9Q026;Q7TPS5	C2 calcium-dependent domain containing 5;C2 domain-containing protein 5	-0.223256	9.2863	0.0538266	0.207701	-2.21699	-4.50214
Kid. Cortex	Mouse	Larp4	Larp4	E9Q066;G3X9Q6;Q8BWW4	La ribonucleoprotein domain family, member 4;La ribonucleoprotein domain family, member 4;La-related protein 4	0.0249896	13.1723	0.853774	0.930298	0.189673	-6.61529
Kid. Cortex	Mouse	Arhgef11	Arhgef11	E9Q0A3;Q68FM7	Rho guanine nucleotide exchange factor (GEF) 11 (Fragment);Rho guanine nucleotide exchange factor (GEF) 11	-0.0551262	16.4171	0.503382	0.72012	-0.697041	-6.37657
Kid. Cortex	Mouse	Oxr1	Oxr1	E9Q0A7	Oxidation resistance 1	0.34754	13.9877	0.00791669	0.0715882	3.39649	-2.61729
Kid. Cortex	Mouse	Sh3kbp1	Sh3kbp1	E9Q0C1	SH3-domain kinase binding protein 1		10.0622
Kid. Cortex	Mouse	Slc6a20a	Slc6a20a	E9Q0H0;Q8VDB9	Transporter;Sodium- and chloride-dependent transporter XTRP3A	0.344944	9.47471	0.233424	0.469877	1.35497	-5.42951
Kid. Cortex	Mouse	Fabp7	Fabp7	E9Q0H6;P51880	Fatty acid binding protein 7, brain;Fatty acid-binding protein, brain	-0.221096	13.5357	0.0604612	0.221042	-2.14565	-4.61233
Kid. Cortex	Mouse	Kif21a	Kif21a	E9Q0J5;F8WGN6;Q9QXL2	Kinesin family member 21A;Kinesin family member 21A;Kinesin-like protein KIF21A	-0.139637	12.1119	0.0459714	0.189759	-2.3135	-4.35151
Kid. Cortex	Mouse	Itsn1	Itsn1	E9Q0N0;Q9Z0R4	Intersectin 1 (SH3 domain protein 1A);Intersectin-1	0.145153	12.5675	0.20051	0.431879	1.3813	-5.69144
Kid. Cortex	Mouse	Bbs7	Bbs7	E9Q0R0;Q8K2G4	Bardet-Biedl syndrome 7 (human);Bardet-Biedl syndrome 7 protein homolog	-0.213479	10.3552	0.134504	0.348549	-1.64439	-5.3467
Kid. Cortex	Mouse	Nexn	Nexn	A0A0G2JEX1;A0A0G2JG59;A0A0G2JGI1;Q7TPW1	Nexilin;Nexilin (Fragment);Nexilin;Nexilin	0.678433	10.8293	0.00168023	0.031339	4.4162	-1.05091
Kid. Cortex	Mouse	Ppt2	Ppt2	E9Q0T0;G5E8W7;O35448	Palmitoyl-protein thioesterase 2 (Fragment);Palmitoyl-protein thioesterase 2 (Fragment);Lysosomal thioesterase PPT2	0.143996	12.6542	0.458205	0.683222	0.775019	-6.3175
Kid. Cortex	Mouse	Ablim2	Ablim2	E9Q0W6;E9Q4K0;Q8BL65	Actin-binding LIM protein 2	0.017008	9.78122	0.938836	0.971149	0.0789032	-6.6315
Kid. Cortex	Mouse	Snrpe	Snrpe	E9Q0W8;E9Q4F4;P62305	Small nuclear ribonucleoprotein E	0.205149	14.3542	0.0369898	0.16908	2.44613	-4.14216
Kid. Cortex	Mouse	Sipa1	Sipa1	E9Q0Y4;P46062	Signal-induced proliferation associated gene 1;Signal-induced proliferation-associated protein 1	0.344413	11.1221	0.00162509	0.0310996	4.43924	-1.0171
Kid. Cortex	Mouse	Abhd14a	Abhd14a	E9Q136	Abhydrolase domain containing 14A	-0.400225	11.3889	0.00401588	0.049993	-3.83187	-1.93324
Kid. Cortex	Mouse	Tex264	Tex264	E9Q137	Testis-expressed protein 264 homolog	0.000252478	12.4623	0.998499	0.999156	0.00193385	-6.63489
Kid. Cortex	Mouse	Dvl3	Dvl3	E9Q150;E9Q967;Q61062	Dishevelled segment polarity protein 3;Dishevelled segment polarity protein 3;Segment polarity protein dishevelled homolog DVL-3	0.119258	10.5647	0.433646	0.662034	0.819535	-6.28134
Kid. Cortex	Mouse	Slc6a8	Slc6a8	E9Q151;Q8VBW1	Transporter;Sodium- and chloride-dependent creatine transporter 1	-0.327014	12.5189	0.016986	0.111271	-2.92162	-3.37932
Kid. Cortex	Mouse	Atad2b	Atad2b	E9Q166	ATPase family, AAA domain containing 2B	0.168183	10.9161	0.0611076	0.222535	2.13912	-4.62238
Kid. Cortex	Mouse	Fcf1	Fcf1	E9Q186;Q9CTH6	FCF1 rRNA processing protein;rRNA-processing protein FCF1 homolog	0.444314	10.0582	0.0435295	0.184309	2.34683	-4.29913
Kid. Cortex	Mouse	Syde2	Syde2	A0A0G2JEY9;E9PUP1	Synapse defective 1, Rho GTPase, homolog 2 (C. elegans);Synapse defective 1, Rho GTPase, homolog 2 (C. elegans)	1.30017	11.0582	0.0223665	0.128113	2.75298	-3.65106
Kid. Cortex	Mouse	Pde4dip	Pde4dip	E9Q1A0;G3X9L9;Q80YT7	Phosphodiesterase 4D interacting protein (myomegalin);Phosphodiesterase 4D interacting protein (myomegalin);Myomegalin	0.0439717	11.631	0.643875	0.814136	0.47825	-6.51156
Kid. Cortex	Mouse	Tgfb1i1	Tgfb1i1	E9Q1D5;Q62219	Transforming growth factor beta-1-induced transcript 1 protein	0.480695	12.6291	0.00065199	0.019953	5.09209	-0.0921793
Kid. Cortex	Mouse	Ltbp2	Ltbp2	E9Q1D6;E9QNQ3;O08999;Q0VD84	Latent transforming growth factor beta binding protein 2;Latent transforming growth factor beta binding protein 2;Latent-transforming growth factor beta-binding protein 2;Latent transforming growth factor beta binding protein 2		9.34859
Kid. Cortex	Mouse	Myo5c	Myo5c	E9Q1F5	Myosin VC	-0.0351656	9.19706	0.808935	0.907435	-0.249935	-6.54881
Kid. Cortex	Mouse	Septin7	Septin7	E9Q1G8;E9Q9F5;O55131	Septin;Septin;Septin-7	0.193476	14.3891	0.0367189	0.168659	2.45061	-4.13505
Kid. Cortex	Mouse	Zc3h12c	Zc3h12c	E9Q1I3;Q5DTV4	Zinc finger CCCH type containing 12C;Probable ribonuclease ZC3H12C	-0.0509003	10.7139	0.704818	0.849042	-0.391103	-6.55207
Kid. Cortex	Mouse	Snx25	Snx25	E9Q1K0	Sorting nexin 25	-0.309748	10.1845	0.0144796	0.101251	-3.01995	-3.22085
Kid. Cortex	Mouse	Klhl5	Klhl5	E9Q1L2;E9QA66;Q6PFE1	Kelch-like 5	0.460363	8.99963	0.021305	0.125303	3.67438	-2.79717
Kid. Cortex	Mouse	Senp7	Senp7	E9Q1L5;Q8BUH8	SUMO1/sentrin specific peptidase 7;Sentrin-specific protease 7	0.253744	9.90112	0.0935594	0.283805	1.87492	-5.01916
Kid. Cortex	Mouse	Dnajc28	Dnajc28	E9Q1L7;Q8VCE1	DnaJ heat shock protein family (Hsp40) member C28;DnaJ homolog subfamily C member 28	-0.314474	10.9987	0.005457	0.0599772	-3.63331	-2.24283
Kid. Cortex	Mouse	Ccdc12	Ccdc12	A0A0G2JF16;Q8R344	Coiled-coil domain containing 12 (Fragment);Coiled-coil domain-containing protein 12	0.275227	10.2656	0.801692	0.903396	0.258692	-6.59848
Kid. Cortex	Mouse	Pdzd2	Pdzd2	E9Q1M1	PDZ domain containing 2	-0.165858	9.93021	0.0541406	0.208491	-2.21342	-4.50767
Kid. Cortex	Mouse	Ext2	Ext2	E9Q1M5;P70428;V9GX32	Exostosin glycosyltransferase 2;Exostosin-2;Exostosin glycosyltransferase 2	0.258697	10.3017	0.0518928	0.203451	2.2394	-4.4673
Kid. Cortex	Mouse	Shank3	Shank3	E9Q1P5	SH3 and multiple ankyrin repeat domains 3 (Fragment)	-0.325971	9.7138	0.214913	0.448901	-1.33419	-5.74923
Kid. Cortex	Mouse	Irf2bp2	Irf2bp2	E9Q1P8	Interferon regulatory factor 2-binding protein 2	0.260738	11.2251	0.0485228	0.195548	2.28048	-4.40322
Kid. Cortex	Mouse	Sec23a	Sec23a	E9Q1S3;Q01405	Protein transport protein SEC23;Protein transport protein Sec23A	0.0991235	13.4443	0.235035	0.472076	1.27265	-5.8227
Kid. Cortex	Mouse	Synpo2	Synpo2	E9Q1U2	Synaptopodin 2	0.303977	11.4216	0.105116	0.304361	1.80164	-5.12547
Kid. Cortex	Mouse	Ctif	Ctif	E9Q1U6;Q6PEE2	CBP80/20-dependent translation initiation factor	-0.0441345	10.9696	0.623155	0.801091	-0.508763	-6.49556
Kid. Cortex	Mouse	Trim24	Trim24	E9Q1U8;Q64127	Tripartite motif-containing 24;Transcription intermediary factor 1-alpha	0.19706	10.5254	0.19288	0.422995	1.40745	-5.65881
Kid. Cortex	Mouse	Tbck	Tbck	E9Q1W7	TBC1 domain containing kinase	-0.000316896	12.3405	0.996185	0.998385	-0.00491536	-6.63488
Kid. Cortex	Mouse	Cacna2d1	Cacna2d1	E9Q1X8;O08532	Calcium channel, voltage-dependent, alpha2/delta subunit 1;Voltage-dependent calcium channel subunit alpha-2/delta-1	0.440612	11.921	0.00274415	0.0404253	4.0833	-1.54796
Kid. Cortex	Mouse	Klhl7	Klhl7	A0A0G2JF30;G3UW75;Q8BUL5	Kelch-like 7;Kelch-like 7;Kelch-like protein 7	0.990841	9.30809	0.109093	0.310841	1.77815	-5.15913
Kid. Cortex	Mouse	Krt90	Krt90	E9Q1Z0	Keratin 90	0.355758	12.3326	0.615233	0.796162	0.522868	-6.40337
Kid. Cortex	Mouse	Abcc4	Abcc4	E9Q236	ATP-binding cassette sub-family C member 4	-0.267888	13.1623	0.504737	0.720863	-0.694772	-6.3782
Kid. Cortex	Mouse	Kank1	Kank1	E9Q238	KN motif and ankyrin repeat domains 1	-0.0690079	11.9471	0.38979	0.621352	-0.903523	-6.20844
Kid. Cortex	Mouse	Sumf1	Sumf1	E9Q265;Q8R0F3	Sulfatase modifying factor 1;Formylglycine-generating enzyme	0.0514344	10.9194	0.691207	0.84158	0.410263	-6.54383
Kid. Cortex	Mouse	Coil	Coil	E9Q284;Q5SU73	Coilin	0.229415	9.87977	0.145601	0.364041	1.5931	-5.4166
Kid. Cortex	Mouse	Gm38392	Gm38392;Rhbg	E9Q2A2;Q8BUX5	Predicted gene, 38392 (Fragment);Ammonium transporter Rh type B	-0.457412	14.4844	0.00231569	0.0371563	-4.1973	-1.376
Kid. Cortex	Mouse	Ptk2b	Ptk2b	E9Q2A6	non-specific protein-tyrosine kinase	-0.0254059	12.0718	0.697034	0.846152	-0.402041	-6.54741
Kid. Cortex	Mouse	Ncor1	Ncor1	E9Q2B2;Q5RIM6	Nuclear receptor co-repressor 1	0.217119	11.0381	0.0211257	0.124674	2.78789	-3.59485
Kid. Cortex	Mouse	Hectd4	Hectd4	E9Q2E4	HECT domain E3 ubiquitin protein ligase 4	-0.0293267	10.9302	0.680044	0.834815	-0.426099	-6.53674
Kid. Cortex	Mouse	Clcn3	Clcn3	E9Q2I1	Chloride channel protein	-0.0727673	11.9214	0.566229	0.765711	-0.595423	-6.44505
Kid. Cortex	Mouse	Brap	Brap	A0A0G2JF68	BRCA1 associated protein (Fragment)	-0.179404	9.47821	0.365862	0.598631	-0.958531	-6.0726
Kid. Cortex	Mouse	Mideas	Mideas	E9Q2I4	Mitotic deacetylase associated SANT domain protein	0.114364	9.19955	0.656504	0.822068	0.459888	-6.52074
Kid. Cortex	Mouse	Wdfy4	Wdfy4	E9Q2M9	WD repeat- and FYVE domain-containing protein 4	1.40043	10.1019	2.8663e-05	0.00487834	7.74416	3.0137
Kid. Cortex	Mouse	Tle1	Tle1	E9Q2Q6;Q5SQA2;Q5SQA3;Q5SQA4;Q62440	Transducin-like enhancer of split 1;Transducin-like enhancer of split 1;Transducin-like enhancer of split 1;Transducin-like enhancer of split 1;Transducin-like enhancer protein 1	0.303115	10.9286	0.135405	0.349962	1.72435	-5.02435
Kid. Cortex	Mouse	Csnk1a1	Csnk1a1	E9Q2U6	Casein kinase 1, alpha 1	0.0505486	13.6143	0.422997	0.6531	0.839366	-6.26467
Kid. Cortex	Mouse	Tbc1d14	Tbc1d14	E9Q2V7;E9Q8K4;G3UVU5;Q8CGA2	TBC1 domain family, member 14;TBC1 domain family, member 14;TBC1 domain family, member 14;TBC1 domain family member 14	0.0687714	10.2821	0.6472	0.816042	0.473399	-6.51402
Kid. Cortex	Mouse	Borcs5	Borcs5	E9Q2W8;Q9D920	BLOC-1-related complex subunit 5	-0.146153	10.9518	0.0714984	0.243462	-2.04229	-4.76999
Kid. Cortex	Mouse	Actn4	Actn4	E9Q2W9	Actinin alpha 4 (Fragment)	0.151851	11.4416	0.0794513	0.258447	1.97692	-4.86829
Kid. Cortex	Mouse	Smc4	Smc4	E9Q2X6;Q8CG47	Structural maintenance of chromosomes protein;Structural maintenance of chromosomes protein 4	0.535751	10.0881	0.000787101	0.0222607	4.95378	-0.282678
Kid. Cortex	Mouse	Ikbkg	Ikbkg	E9Q2Y3;O88522;Q7TSS3;Q8VC91	Inhibitor of kappaB kinase gamma;NF-kappa-B essential modulator;Inhibitor of kappaB kinase gamma;Ikbkg protein	0.19394	11.5347	0.0708634	0.24314	2.04781	-4.76164
Kid. Cortex	Mouse	Cep350	Cep350	E9Q309	Centrosome-associated protein 350	0.0584145	8.92979	0.83199	0.919892	0.218398	-6.60891
Kid. Cortex	Mouse	Ighv1-53	Ighv1-53	A0A075B5W3	Immunoglobulin heavy variable 1-53 (Fragment)	1.25792	9.91639	0.00794295	0.0715988	4.26925	-1.99264
Kid. Cortex	Mouse	Cdkl5	Cdkl5	A0A0G2JF79;A0A0G2JFE2;A0A0G2JGW6;Q3UTQ8	Cyclin-dependent kinase-like 5	-0.575837	8.54419	0.0393232	0.174083	-3.01571	-3.48208
Kid. Cortex	Mouse	Tarbp1	Tarbp1	E9Q368	TAR RNA binding protein 1	0.0344135	8.54134	0.749425	0.874606	0.329351	-6.57601
Kid. Cortex	Mouse	Sptb	Sptb	E9Q397;P15508;Q3UGX2	Spectrin beta chain;Spectrin beta chain, erythrocytic;Spectrin beta chain	-0.201418	11.5901	0.345578	0.581297	-0.995334	-6.12205
Kid. Cortex	Mouse	Rcbtb2	Rcbtb2	E9Q3B1;F6QHR6;Q99LJ7	Regulator of chromosome condensation (RCC1) and BTB (POZ) domain containing protein 2;Regulator of chromosome condensation (RCC1) and BTB (POZ) domain containing protein 2 (Fragment);RCC1 and BTB domain-containing protein 2	-0.0492126	10.5908	0.6615	0.824397	-0.45267	-6.52426
Kid. Cortex	Mouse	C2cd2	C2cd2	E9Q3C1	C2 domain-containing protein 2	0.0180826	12.4965	0.785672	0.895116	0.280181	-6.59221
Kid. Cortex	Mouse	Synpo	Synpo	E9Q3E2	Synaptopodin	0.496746	13.29	0.0156104	0.105679	2.97359	-3.29556
Kid. Cortex	Mouse	Atp11a	Atp11a	E9Q3G7	Phospholipid-transporting ATPase	0.359594	13.8981	0.544598	0.752583	0.62961	-6.4231
Kid. Cortex	Mouse	Nup153	Nup153	E9Q3G8	Nucleoporin 153	0.186155	11.5361	0.0513941	0.201874	2.24531	-4.4581
Kid. Cortex	Mouse	Spata13	Spata13	E9Q3I3	Spermatogenesis associated 13	-0.110357	11.1707	0.284556	0.523314	-1.13787	-5.975
Kid. Cortex	Mouse	Pi4ka	Pi4ka	E9Q3L2	Phosphatidylinositol 4-kinase alpha	-0.0195678	13.6886	0.730468	0.864211	-0.355412	-6.56639
Kid. Cortex	Mouse	Cracdl	Cracdl	E9Q3M9	Capping protein inhibiting regulator of actin like	0.238248	10.8387	0.471928	0.695273	0.75083	-6.33642
Kid. Cortex	Mouse	Tdrkh	Tdrkh	A0A0G2JFB2;Q80VL1	Tudor and KH domain containing protein;Tudor and KH domain-containing protein	-0.292877	10.3068	0.133017	0.345633	-1.65156	-5.33684
Kid. Cortex	Mouse	Recql	Recql	E9Q3N0;Q9Z129	ATP-dependent DNA helicase;ATP-dependent DNA helicase Q1	0.339429	9.62691	0.00784705	0.0712742	3.40207	-2.60842
Kid. Cortex	Mouse	Alcam	Alcam	E9Q3Q6;E9Q4G8;Q61490	Activated leukocyte cell adhesion molecule;Activated leukocyte cell adhesion molecule;CD166 antigen	0.118203	12.3189	0.500504	0.717801	0.701874	-6.37307
Kid. Cortex	Mouse	Zbtb21	Zbtb21	E9Q3R9;E9Q444;G3X9A3	Zinc finger and BTB domain containing 21	0.338425	8.04713	0.0923234	0.281579	1.88326	-5.00696
Kid. Cortex	Mouse	Mia2	Mia2	E9Q3S2;H3BK48	MIA SH3 domain ER export factor 2	0.0883389	9.32963	0.775402	0.88961	0.294031	-6.58791
Kid. Cortex	Mouse	Naa16	Naa16	E9Q3U5	N(alpha)-acetyltransferase 16, NatA auxiliary subunit	0.273512	11.1109	0.0831744	0.26504	1.94843	-4.91075
Kid. Cortex	Mouse	Slc35a3	Slc35a3	E9Q3V2	Solute carrier family 35 (UDP-N-acetylglucosamine (UDP-GlcNAc) transporter), member 3 (Fragment)	0.0616654	14.4989	0.877287	0.94273	0.15886	-6.62113
Kid. Cortex	Mouse	Mvp	Mvp	E9Q3X0	Major vault protein	0.539851	11.005	0.0204741	0.122834	2.80706	-3.56397
Kid. Cortex	Mouse	Hps5	Hps5	E9Q3X4;P59438	Hermansky-Pudlak syndrome 5 protein homolog;BLOC-2 complex member HPS5	0.0634859	10.5226	0.36312	0.596233	0.957932	-6.15806
Kid. Cortex	Mouse	Lrba	Lrba	E9Q3Y4	LPS-responsive beige-like anchor	-0.127547	14.0365	0.032617	0.158989	-2.52281	-4.02014
Kid. Cortex	Mouse	Hk3	Hk3	E9Q3Z4;E9Q8S8;Q3TRM8	hexokinase;hexokinase;Hexokinase-3		10.4499
Kid. Cortex	Mouse	Ppp1cc	Ppp1cc	A0A0G2JFF1	Serine/threonine-protein phosphatase (Fragment)	0.111843	10.0095	0.803215	0.904151	0.257603	-6.54668
Kid. Cortex	Mouse	Ryr2	Ryr2	E9Q401;F6U7V1	Ryanodine receptor 2;Ryanodine receptor 2, cardiac	0.0336201	9.99894	0.773871	0.888647	0.296101	-6.58725
Kid. Cortex	Mouse	Nbas	Nbas	E9Q411	Neuroblastoma amplified sequence	0.027487	13.7627	0.698491	0.846776	0.399989	-6.5483
Kid. Cortex	Mouse	Apob	Apob	E9Q414	Apolipoprotein B-100	0.776606	11.1617	0.00365504	0.0476556	3.89351	-1.83805
Kid. Cortex	Mouse	Tgfbr1	Tgfbr1	E9Q418	receptor protein serine/threonine kinase	0.133348	11.1709	0.33923	0.574689	1.00922	-6.1084
Kid. Cortex	Mouse	Rnf25	Rnf25	E9Q446;Q9QZR0	Ring finger protein 25;E3 ubiquitin-protein ligase RNF25	0.0700289	9.57658	0.567546	0.766485	0.593366	-6.44633
Kid. Cortex	Mouse	Dennd4c	Dennd4c	E9Q449	DENN/MADD domain containing 4C	-0.500164	8.94134	0.0461322	0.190175	-2.41938	-4.14915
Kid. Cortex	Mouse	Tpm1	Tpm1	E9Q450	Tropomyosin 1, alpha	0.563966	12.8283	0.00852988	0.0749293	3.34949	-2.69217
Kid. Cortex	Mouse	Tpm1	Tpm1	E9Q453;E9Q456	Tropomyosin 1, alpha;Tropomyosin 1, alpha	0.236771	14.5631	0.338873	0.574611	1.01001	-6.10762
Kid. Cortex	Mouse	Ppp4r3a	Ppp4r3a	E9Q481;Q6P2K6	Protein phosphatase 4 regulatory subunit 3A;Serine/threonine-protein phosphatase 4 regulatory subunit 3A	0.212861	12.7249	0.0083838	0.0740926	3.36036	-2.67484
Kid. Cortex	Mouse	Use1	Use1	E9Q496;Q9CQ56	Vesicle transport protein USE1	-0.00104922	11.6333	0.994531	0.997676	-0.00704679	-6.63487
Kid. Cortex	Mouse	Sez6l	Sez6l	A0A0G2JFG4;A0A0G2JG23;A0A0R4J0Y4;A0A1D5RMI4;A0A1D5RMJ7;Q6P1D5	Seizure related 6 homolog like (Fragment);Seizure related 6 homolog like;Seizure related 6 homolog like;Seizure related 6 homolog like;Seizure related 6 homolog like;Seizure 6-like protein	0.181788	12.9198	0.700455	0.847859	0.397227	-6.54948
Kid. Cortex	Mouse	Pcsk6	Pcsk6	E9Q4D0;F6XJP7;H3BJL4	Proprotein convertase subtilisin/kexin type 6;Proprotein convertase subtilisin/kexin type 6;Proprotein convertase subtilisin/kexin type 6 (Fragment)	0.559305	8.30784	0.0975053	0.29105	2.38114	-4.12493
Kid. Cortex	Mouse	Ankrd11	Ankrd11	E9Q4F7;E9Q4F8	Ankyrin repeat domain-containing protein 11;Ankyrin repeat domain 11	-0.330798	7.69067	0.453272	0.679373	-0.783831	-6.31048
Kid. Cortex	Mouse	Ptpro	Ptpro	E9Q4I1;E9Q612	protein-tyrosine-phosphatase;Receptor-type tyrosine-protein phosphatase O	-0.123834	11.1606	0.324689	0.56133	-1.04178	-6.07581
Kid. Cortex	Mouse	Lipe	Lipe	E9Q4M2;P54310	Hormone-sensitive lipase	-0.0736145	11.8233	0.377562	0.609097	-0.928123	-6.18596
Kid. Cortex	Mouse	Chchd6	Chchd6	E9Q4M4;Q91VN4	Coiled-coil-helix-coiled-coil-helix domain containing 6;MICOS complex subunit Mic25	-0.482743	12.5557	0.00254681	0.039151	-4.13326	-1.47238
Kid. Cortex	Mouse	Vegfa	Vegfa	E9Q4N8;E9Q4N9;F8WH10;F8WH81;Q00731	Vascular endothelial growth factor A	-0.108209	10.6434	0.569532	0.767659	-0.601479	-6.24275
Kid. Cortex	Mouse	Kxd1	Kxd1	E9Q4P0;E9QNP0	KxDL motif-containing protein 1 (Fragment);KxDL motif-containing protein 1	-0.0593346	16.2331	0.616704	0.796842	-0.518367	-6.49033
Kid. Cortex	Mouse	Wdfy1	Wdfy1	E9Q4P1	WD repeat and FYVE domain-containing protein 1	-0.0133429	12.3785	0.885288	0.946296	-0.148414	-6.62288
Kid. Cortex	Mouse	Sf1	Sf1	E9Q4Q2	Splicing factor 1	0.782721	11.3226	0.00339407	0.0462788	3.94224	-1.76312
Kid. Cortex	Mouse	Uggt2	Uggt2	E9Q4X2	UDP-glucose glycoprotein glucosyltransferase 2	0.171063	10.1338	0.225252	0.460009	1.30199	-5.78796
Kid. Cortex	Mouse	Ap5z1	Ap5z1	A0A0G2JFH9;Q3U829	Adaptor-related protein complex 5, zeta 1 subunit;AP-5 complex subunit zeta-1	0.0170963	10.8524	0.8587	0.932787	0.183202	-6.6166
Kid. Cortex	Mouse	Eps8l1	Eps8l1	E9Q4X5;Q8R5F8	EPS8-like 1;Epidermal growth factor receptor kinase substrate 8-like protein 1	0.291968	10.2523	0.0260926	0.139556	2.65888	-3.80234
Kid. Cortex	Mouse	Acacb	Acacb	E9Q4Z2	Acetyl-CoA carboxylase 2	-0.466313	11.0379	0.0146502	0.10207	-3.01273	-3.23249
Kid. Cortex	Mouse	Gon4l	Gon4l	E9Q507;Q9DB00	GON-4-like protein	-0.0215956	9.01984	0.887833	0.947494	-0.145095	-6.62341
Kid. Cortex	Mouse	Pklr	Pklr	E9Q509	Pyruvate kinase	0.151428	14.9972	0.304534	0.541569	1.0888	-6.02732
Kid. Cortex	Mouse	Trip11	Trip11	E9Q512	Thyroid hormone receptor interactor 11	-0.0262039	12.1137	0.738757	0.868041	-0.343986	-6.5707
Kid. Cortex	Mouse	Dsp	Dsp	E9Q557	Desmoplakin	0.146408	11.6413	0.247876	0.486113	1.23563	-5.86574
Kid. Cortex	Mouse	Myo1b	Myo1b	E9Q580;E9QNH6	Myosin IB	0.52341	10.5651	0.127412	0.336935	1.67923	-5.29856
Kid. Cortex	Mouse	Dctn1	Dctn1	E9Q586	Dynactin subunit 1	-0.0249438	14.1916	0.634245	0.808154	-0.492369	-6.50427
Kid. Cortex	Mouse	Hk2	Hk2	E9Q5B5;O08528	hexokinase;Hexokinase-2	0.632037	10.8785	0.00132004	0.0280527	4.58404	-0.806378
Kid. Cortex	Mouse	Ranbp9	Ranbp9	E9Q5D6;P69566	RAN binding protein 9;Ran-binding protein 9	-0.00965245	11.3062	0.893698	0.948743	-0.137454	-6.62459
Kid. Cortex	Mouse	Cnn3	Cnn3	A0A0G2JFI6	Calponin 3, acidic (Fragment)	0.192934	10.1562	0.767981	0.884491	0.304078	-6.58466
Kid. Cortex	Mouse	Igfbp7	Igfbp7	E9Q5D9	Insulin-like growth factor binding protein 7	0.50534	14.1362	0.0231749	0.13012	2.73128	-3.68598
Kid. Cortex	Mouse	Mef2d	Mef2d	E9Q5E0;E9QKT0;Q63943;Q921S6	Myocyte enhancer factor 2D;Myocyte enhancer factor 2D;Myocyte-specific enhancer factor 2D;Myocyte enhancer factor 2D	0.509122	9.44981	0.0575234	0.214954	2.26943	-4.36554
Kid. Cortex	Mouse	Setd2	Setd2	E9Q5F9	Histone-lysine N-methyltransferase SETD2	0.155271	9.99717	0.166656	0.39027	1.50471	-5.53413
Kid. Cortex	Mouse	Tpm3	Tpm3	E9Q5J9	Tropomyosin 3, gamma	0.118305	12.9551	0.652201	0.818848	0.466125	-6.51766
Kid. Cortex	Mouse	Cyp2c23	Cyp2c23	E9Q5K4	Cytochrome P450 2C44	-1.20799	10.2123	0.084515	0.267612	-1.93847	-4.92554
Kid. Cortex	Mouse	Ythdc1	Ythdc1	E9Q5K9	YTH domain-containing protein 1	0.228331	11.6475	0.0284445	0.146781	2.60624	-3.88676
Kid. Cortex	Mouse	Hpn	Hpn	E9Q5P0;G3UWE8;O35453	Hepsin;Hepsin;Serine protease hepsin	0.161862	11.252	0.472028	0.695273	0.750656	-6.33655
Kid. Cortex	Mouse	Cpeb2	Cpeb2	E9Q5X2;E9Q969	Cytoplasmic polyadenylation element binding protein 2	-0.0919092	10.0917	0.685292	0.837481	-0.418641	-6.54011
Kid. Cortex	Mouse	Frem1	Frem1	E9Q5Z7;Q684R7	Fras1 related extracellular matrix protein 1;FRAS1-related extracellular matrix protein 1	0.471509	9.85179	0.155537	0.377218	1.55006	-5.4743
Kid. Cortex	Mouse	Loxl4	Loxl4	E9Q600;Q924C6	Lysyl oxidase homolog;Lysyl oxidase homolog 4	-0.19498	9.88239	0.26309	0.500662	-1.20375	-5.84931
Kid. Cortex	Mouse	Ints3	Ints3	A0A0G2JFJ6;Q7TPD0	Integrator complex subunit 3	0.171302	11.7902	0.013319	0.0969773	3.07159	-3.1377
Kid. Cortex	Mouse	Chuk	Chuk	E9Q605;E9QNL4	IkappaB kinase;Inhibitor of nuclear factor kappa-B kinase subunit alpha	0.0255782	12.3431	0.713724	0.8539	0.378651	-6.55722
Kid. Cortex	Mouse	Ahnak	Ahnak	E9Q616	AHNAK nucleoprotein (desmoyokin)	0.490122	14.6872	0.00064072	0.019953	5.105	-0.07455
Kid. Cortex	Mouse	Myo1e	Myo1e	E9Q634	Unconventional myosin-Ie	0.421968	12.7675	0.00116291	0.0262647	4.67336	-0.677951
Kid. Cortex	Mouse	Rbm26	Rbm26	E9Q640;Q6NZN0	RNA binding motif protein 26;RNA-binding protein 26	0.231367	11.4152	0.0399378	0.175575	2.39937	-4.21623
Kid. Cortex	Mouse	Arhgap28	Arhgap28	E9Q642;Q8BN58	Rho GTPase activating protein 28;Rho GTPase-activating protein 28	0.845522	10.2126	0.0293983	0.148723	2.58613	-3.91895
Kid. Cortex	Mouse	Cacna2d2	Cacna2d2	E9Q683;Q6PHS9	Calcium channel, voltage-dependent, alpha 2/delta subunit 2;Voltage-dependent calcium channel subunit alpha-2/delta-2	2.80936	10.3736	5.12707e-05	0.00651203	7.19183	2.4469
Kid. Cortex	Mouse	Lck	Lck	E9Q696;P06240	Tyrosine-protein kinase;Proto-oncogene tyrosine-protein kinase LCK	1.06437	9.86772	0.0327021	0.159022	2.92808	-3.36868
Kid. Cortex	Mouse	Col6a6	Col6a6	E9Q6A6;Q8C6K9	Collagen, type VI, alpha 6;Collagen alpha-6(VI) chain	-0.151646	10.3482	0.373626	0.606443	-0.936164	-6.17851
Kid. Cortex	Mouse	C1s1	C1s1	E9Q6C2;Q8CG14	Complement component 1, s subcomponent 1;Complement C1s-1 subcomponent	0.235924	9.42696	0.266229	0.504258	1.18536	-5.92274
Kid. Cortex	Mouse	C6	C6	E9Q6D8	Complement component C6	0.650075	9.66496	0.0748108	0.250359	2.01426	-4.81228
Kid. Cortex	Mouse	Frrs1	Frrs1	A0A0G2JFP4	Ferric-chelate reductase 1	0.0972542	13.5765	0.634797	0.808495	0.491557	-6.5047
Kid. Cortex	Mouse	Srsf11	Srsf11	E9Q6E5;F6RDI8;Q3UIX4	Serine and arginine-rich splicing factor 11;Serine and arginine-rich splicing factor 11 (Fragment);Serine and arginine-rich splicing factor 11	0.139356	12.0912	0.0631566	0.226466	2.11883	-4.65349
Kid. Cortex	Mouse	Abca7	Abca7	E9Q6G4;Q91V24	ATP-binding cassette, sub-family A (ABC1), member 7;ATP-binding cassette sub-family A member 7	0.0277154	8.46986	0.881428	0.94447	0.153994	-6.57008
Kid. Cortex	Mouse	Plekha5	Plekha5	E9Q6H8	Pleckstrin homology domain containing, family A member 5	0.072139	12.4411	0.372788	0.605558	0.937884	-6.1769
Kid. Cortex	Mouse	Il1rap	Il1rap	E9Q6I2;Q61730	Interleukin 1 receptor accessory protein;Interleukin-1 receptor accessory protein	2.10236	10.9353	0.0105303	0.084482	3.21753	-2.90322
Kid. Cortex	Mouse	Bod1l	Bod1l	E9Q6J5	Biorientation of chromosomes in cell division protein 1-like 1	0.141318	10.6221	0.109404	0.311411	1.77634	-5.16171
Kid. Cortex	Mouse	Dmwd	Dmwd	E9Q6J8;Q08274	Dystrophia myotonica-containing WD repeat motif;Dystrophia myotonica WD repeat-containing protein	0.466196	10.1976	0.13443	0.348451	1.64475	-5.34621
Kid. Cortex	Mouse	Ercc2	Ercc2	E9Q6K1;O08811	General transcription and DNA repair factor IIH helicase subunit XPD	0.176147	12.0953	0.134301	0.348212	1.64537	-5.34536
Kid. Cortex	Mouse	Pibf1	Pibf1	E9Q6K3	Progesterone immunomodulatory binding factor 1	0.00436879	10.5979	0.973451	0.987122	0.0342172	-6.63426
Kid. Cortex	Mouse	Gsta5	Gsta5	E9Q6L7	Glutathione S-transferase	-0.151768	17.8707	0.645212	0.814705	-0.476298	-6.51256
Kid. Cortex	Mouse	Slc22a26	Slc22a26	E9Q6M5;Q91WJ2	Solute carrier family 22 (organic cation transporter), member 26;Solute carrier family 22 (organic cation transporter), member 26	0.00632349	9.94969	0.99137	0.996305	0.0111204	-6.63483
Kid. Cortex	Mouse	Ldb2	Ldb2	A0A0G2JFS7;O55203	LIM domain binding 2;LIM domain-binding protein 2	2.45006	8.86691	0.000178271	0.0118818	9.91189	1.02483
Kid. Cortex	Mouse	Tubgcp6	Tubgcp6	E9Q6P4;G5E8P0	Tubulin, gamma complex associated protein 6;Gamma-tubulin complex component 6	-0.0987116	9.07843	0.336324	0.572617	-1.01564	-6.10204
Kid. Cortex	Mouse	Ttc7b	Ttc7b	E9Q6P5	Tetratricopeptide repeat protein 7B	-0.172849	11.9905	0.0524023	0.20444	-2.23342	-4.47661
Kid. Cortex	Mouse	Utrn	Utrn	E9Q6R7	Utrophin	0.185497	12.8939	0.0628211	0.225912	2.1221	-4.64847
Kid. Cortex	Mouse	Kctd1	Kctd1	E9Q6T9	Potassium channel tetramerisation domain containing 1	-0.15337	10.0633	0.36877	0.601326	-0.9716	-5.88899
Kid. Cortex	Mouse	Pfdn4	Pfdn4	E9Q6U4;Q3UWL8	Prefoldin subunit 4	-0.00845578	12.6957	0.893872	0.948743	-0.137228	-6.62462
Kid. Cortex	Mouse	Usp31	Usp31	E9Q6Y8	ubiquitinyl hydrolase 1	-0.0777712	9.83924	0.490477	0.710554	-0.718845	-6.36061
Kid. Cortex	Mouse	Nemp1	Nemp1	E9Q6Z3;Q6ZQE4	Nuclear envelope integral membrane protein 1	0.771232	11.0948	0.0124878	0.093122	3.20656	-2.97118
Kid. Cortex	Mouse	Plod2	Plod2	E9Q718;Q9R0B9	procollagen-lysine 5-dioxygenase;Procollagen-lysine,2-oxoglutarate 5-dioxygenase 2	0.965496	12.0561	1.34637e-05	0.00342591	8.50981	3.73913
Kid. Cortex	Mouse	Usf1	Usf1	E9Q722;Q61069	Upstream transcription factor 1;Upstream stimulatory factor 1	-0.187819	9.87278	0.216278	0.450568	-1.32986	-5.75447
Kid. Cortex	Mouse	Akap11	Akap11	E9Q777	A kinase (PRKA) anchor protein 11	0.122974	11.984	0.185747	0.414705	1.4327	-5.62693
Kid. Cortex	Mouse	Atg4a-ps	Atg4a-ps;Atg4a;Atg4a	A0A0G2JFS9;A0A7N9VS64;Q8C9S8	Cysteine protease;Cysteine protease;Cysteine protease ATG4A	-0.0558652	10.3993	0.733121	0.86572	-0.35175	-6.56779
Kid. Cortex	Mouse	Dnase1	Dnase1	E9Q797;H3BKL7;P49183	Deoxyribonuclease I (Fragment);Deoxyribonuclease I;Deoxyribonuclease-1	-0.29765	12.5179	0.511566	0.727107	-0.686891	-6.29894
Kid. Cortex	Mouse	Arhgef5	Arhgef5	E9Q7D5	Rho guanine nucleotide exchange factor 5	-0.0365224	11.9706	0.63606	0.809012	-0.4897	-6.50567
Kid. Cortex	Mouse	Arid2	Arid2	E9Q7E2	AT-rich interactive domain-containing protein 2	0.103849	10.5465	0.28993	0.527051	1.12441	-5.98953
Kid. Cortex	Mouse	Rnf169	Rnf169	E9Q7F2	E3 ubiquitin-protein ligase RNF169	0.316913	9.48106	0.0220463	0.127483	2.7618	-3.63687
Kid. Cortex	Mouse	Numa1	Numa1	E9Q7G0	Nuclear mitotic apparatus protein 1	0.108804	13.2426	0.19051	0.420016	1.41574	-5.64837
Kid. Cortex	Mouse	Mettl17	Mettl17	E9Q7K9;F7AGB5;Q3U2U7	Methyltransferase like 17;Methyltransferase like 17 (Fragment);Methyltransferase-like protein 17, mitochondrial	-0.0246895	11.611	0.82249	0.9144	-0.230988	-6.60584
Kid. Cortex	Mouse	Urb2	Urb2	E9Q7L1	URB2 ribosome biogenesis 2 homolog (S. cerevisiae)	0.0480877	10.9371	0.589093	0.779892	0.560076	-6.46654
Kid. Cortex	Mouse	Gal3st4	Gal3st4	E9Q7N6;Q3V1B8	Galactose-3-O-sulfotransferase 4	-0.399633	16.2667	0.000495209	0.0177437	-5.29781	0.185687
Kid. Cortex	Mouse	Dnah11	Dnah11	E9Q7N9	Dynein, axonemal, heavy chain 11	0.359627	12.1681	0.0437113	0.184814	2.34428	-4.30314
Kid. Cortex	Mouse	Cdhr2	Cdhr2	E9Q7P9	Cadherin-related family member 2	-0.245839	13.0988	0.0829899	0.264895	-1.94981	-4.90869
Kid. Cortex	Mouse	Ighv8-6	Ighv8-6;Ighv8-9;Ighv8-11;Ighv8-13;Ighv8-13;Ighv8-6;Ighv8-5;Ighv8-9	A0A075B5W4;A0A075B5X1;A0A075B5X4;A0A075B5Y0;A0A075B678;A0A0A6YXA3;A0A0A6YY60;A0A0G2JET1	Immunoglobulin heavy variable V8-6;Immunoglobulin heavy variable V8-9;Immunoglobulin heavy variable V8-11 (Fragment);Immunoglobulin heavy variable 8-13;Immunoglobulin heavy variable 8-13 (Fragment);Immunoglobulin heavy variable V8-6 (Fragment);Immunoglobulin heavy variable V8-5 (Fragment);Immunoglobulin heavy variable V8-9 (Fragment)	-1.19752	9.95893	0.100282	0.295328	-2.12927	-4.34756
Kid. Cortex	Mouse	Rufy3	Rufy3	A0A0G2JFT8	RUN and FYVE domain containing 3	-0.0915678	13.6105	0.498426	0.715975	-0.705373	-6.37052
Kid. Cortex	Mouse	Klhl32	Klhl32	E9Q7Q2	Kelch-like 32	0.00582474	10.1386	0.960427	0.980847	0.0511923	-6.55007
Kid. Cortex	Mouse	Rhpn1	Rhpn1	E9Q7Q7	Rhophilin, Rho GTPase binding protein 1	0.0221197	11.7368	0.849166	0.927658	0.195734	-6.61402
Kid. Cortex	Mouse	Art3	Art3	E9Q7Q8;E9QNU1	NAD(P)(+)--arginine ADP-ribosyltransferase	-0.0134641	10.2658	0.922689	0.962766	-0.0998027	-6.62946
Kid. Cortex	Mouse	Zfp106	Zfp106;Znf106;Zfp106	E9Q7S1;O88466;R4GML0	Zinc finger protein 106	0.828279	9.40756	0.0184398	0.115625	4.67879	-2.48721
Kid. Cortex	Mouse	Lep	Lep	E9Q7Z0;P41160	Leptin (Fragment);Leptin	-1.21672	8.07419	0.00796604	0.0716267	-3.50956	-2.49375
Kid. Cortex	Mouse	Nav2	Nav2	E9Q842;V9GX91;V9GXT3	Neuron navigator 2	-0.230131	10.628	0.198068	0.428948	-1.38958	-5.68115
Kid. Cortex	Mouse	Afdn	Afdn	E9Q852	Afadin, adherens junction formation factor	0.029009	9.33563	0.807943	0.906833	0.250342	-6.60079
Kid. Cortex	Mouse	Scamp3	Scamp3	E9Q855;O35609	Secretory carrier-associated membrane protein;Secretory carrier-associated membrane protein 3	-0.0737456	12.3749	0.649134	0.816912	-0.470583	-6.51544
Kid. Cortex	Mouse	Pi4kb	Pi4kb	E9Q8A3;Q8BKC8	Phosphatidylinositol 4-kinase beta	0.0724329	10.8246	0.247241	0.485496	1.23742	-5.86367
Kid. Cortex	Mouse	Dnajc21	Dnajc21	E9Q8D0	DnaJ homolog subfamily C member 21	0.00758079	10.6325	0.942545	0.97265	0.0741086	-6.6319
Kid. Cortex	Mouse	Rprd2	Rprd2	A0A0G2JFW6;Q6NXI6	Regulation of nuclear pre-mRNA domain containing 2 (Fragment);Regulation of nuclear pre-mRNA domain-containing protein 2	0.0948557	11.4564	0.276597	0.514288	1.15818	-5.95284
Kid. Cortex	Mouse	Cfh	Cfh	E9Q8I0;P06909	Complement component factor h;Complement factor H	0.412883	14.1592	0.0199834	0.121159	2.82192	-3.54003
Kid. Cortex	Mouse	Nfxl1	Nfxl1	E9Q8I7	Nuclear transcription factor, X-box binding-like 1	0.19741	9.82896	0.415646	0.645831	0.853257	-6.25279
Kid. Cortex	Mouse	Zc3h4	Zc3h4	E9Q8K8;Q6ZPZ3	Zinc finger CCCH-type containing 4;Zinc finger CCCH domain-containing protein 4	0.084964	11.2449	0.34958	0.583818	0.98668	-6.13048
Kid. Cortex	Mouse	Rab11fip1	Rab11fip1	E9Q8L9	RAB11 family interacting protein 1 (class I)	0.0356132	10.4257	0.701461	0.84822	0.395814	-6.55008
Kid. Cortex	Mouse	Zfp358	Zfp358	E9Q8M1	Zinc finger protein 358	0.861302	11.7789	0.00804045	0.0722277	4.90023	-1.88099
Kid. Cortex	Mouse	Rgl1	Rgl1	E9Q8M9;E9Q8N0;Q60695	Ral guanine nucleotide dissociation stimulator,-like 1;Ral guanine nucleotide dissociation stimulator,-like 1;Ral guanine nucleotide dissociation stimulator-like 1	0.0267395	10.9028	0.855393	0.930986	0.187545	-6.61572
Kid. Cortex	Mouse	Clasp2	Clasp2	E9Q8N5;F7DCH5;Q08EB5;Q08EB6;Q8BRT1	CLIP associating protein 2;CLIP associating protein 2;CLIP associating protein 2;CLIP associating protein 2;CLIP-associating protein 2	0.089121	12.564	0.337025	0.57283	1.01409	-6.10358
Kid. Cortex	Mouse	Trabd	Trabd	E9Q8R5;Q99JY4	TraB domain containing;TraB domain-containing protein	-0.0360766	11.9637	0.657843	0.822714	-0.457951	-6.52169
Kid. Cortex	Mouse	Cep41	Cep41	E9Q8S3;H9KUZ8;Q99NF3;S4R2L7	Centrosomal protein 41;Centrosomal protein 41;Centrosomal protein of 41 kDa;Centrosomal protein 41	0.0762486	9.65879	0.599347	0.786612	0.544469	-6.47564
Kid. Cortex	Mouse	Tacc2	Tacc2	E9Q8T1	Transforming, acidic coiled-coil containing protein 2	-0.0688794	12.3986	0.417351	0.64734	-0.85002	-6.25557
Kid. Cortex	Mouse	Tsc22d2	Tsc22d2	A0A0G2JFZ4;E9Q7M2	TSC22 domain family, member 2;TSC22 domain family, member 2	-0.118578	11.6055	0.156225	0.377674	-1.54717	-5.47814
Kid. Cortex	Mouse	Dennd4a	Dennd4a	E9Q8V6	DENN/MADD domain containing 4A	-0.0483076	8.64657	0.723184	0.859661	-0.366934	-6.47792
Kid. Cortex	Mouse	Zbtb10	Zbtb10	E9Q8X5	Zinc finger and BTB domain containing 10	0.0725965	8.63253	0.556503	0.759072	0.610702	-6.43538
Kid. Cortex	Mouse	Sspn	Sspn	E9Q8Y7	Sarcospan		9.08022
Kid. Cortex	Mouse	Ctnnd1	Ctnnd1	E9Q8Z6;E9Q8Z8;G3X9V2;P30999	Catenin (cadherin associated protein), delta 1;Catenin (cadherin associated protein), delta 1;Catenin (cadherin associated protein), delta 1;Catenin delta-1	-0.099149	13.9953	0.151318	0.37131	-1.56802	-5.45032
Kid. Cortex	Mouse	Rap1gds1	Rap1gds1	E9Q912	Rap1 GTPase-GDP dissociation stimulator 1	0.041564	13.0914	0.626478	0.803629	0.503836	-6.49821
Kid. Cortex	Mouse	Tmem11	Tmem11	E9Q933;Q8BK08	Transmembrane protein 11;Transmembrane protein 11, mitochondrial	-0.202549	13.4452	0.0449662	0.187724	-2.327	-4.33031
Kid. Cortex	Mouse	Oas2	Oas2	E9Q9A9	2'-5'-oligoadenylate synthase 2	0.246175	10.3156	0.498877	0.716191	0.719514	-6.16026
Kid. Cortex	Mouse	Kif1c	Kif1c	E9Q9B0;O35071	Kinesin family member 1C;Kinesin-like protein KIF1C	-0.0394599	11.9778	0.591686	0.780602	-0.556116	-6.46887
Kid. Cortex	Mouse	Spryd3	Spryd3	E9Q9B3	SPRY domain containing 3	0.271344	10.2401	0.0540266	0.208247	2.21472	-4.50566
Kid. Cortex	Mouse	Ablim1	Ablim1	E9Q9C0;E9Q9C1;E9Q9C2;E9Q9C7;E9QK41;Q8K4G5	Actin-binding LIM protein 1	-0.742324	12.3155	0.000408212	0.0163286	-5.44507	0.380554
Kid. Cortex	Mouse	Crybg1	Crybg1	A0A0G2JG52	Crystallin beta-gamma domain containing 1	-0.00563119	10.223	0.941209	0.972011	-0.0758353	-6.63176
Kid. Cortex	Mouse	Afdn	Afdn	E9Q9C3	Afadin, adherens junction formation factor		9.84305
Kid. Cortex	Mouse	Atp6v0c	Atp6v0c	E9Q9C5;P63082	V-type proton ATPase proteolipid subunit (Fragment);V-type proton ATPase 16 kDa proteolipid subunit c	-0.0148948	12.897	0.935496	0.968943	-0.0832227	-6.63111
Kid. Cortex	Mouse	Rabl2	Rabl2	E9Q9D5	Rab-like protein 2A	-0.360268	10.7937	0.185635	0.414644	-1.43311	-5.62641
Kid. Cortex	Mouse	R3hdm2	R3hdm2	E9Q9D6;Q148X5;Q80TM6	R3H domain containing 2;R3H domain containing 2;R3H domain-containing protein 2	0.0934478	9.69191	0.742955	0.870985	0.338217	-6.57282
Kid. Cortex	Mouse	Dlg5	Dlg5	E9Q9I2;E9Q9R9	Discs large MAGUK scaffold protein 5;Disks large homolog 5	0.197163	10.0123	0.230744	0.46576	1.28539	-5.80768
Kid. Cortex	Mouse	Ppip5k2	Ppip5k2	E9Q9J4	Inositol hexakisphosphate and diphosphoinositol-pentakisphosphate kinase	0.120167	11.3099	0.0523902	0.20444	2.23356	-4.47639
Kid. Cortex	Mouse	Nbeal2	Nbeal2	E9Q9L6;Q6ZQA0	Neurobeachin-like 2;Neurobeachin-like protein 2	0.107219	12.969	0.446223	0.672925	0.796533	-6.30024
Kid. Cortex	Mouse	Cep290	Cep290	E9Q9M0;Q6A078	Centrosomal protein 290;Centrosomal protein of 290 kDa	0.157744	7.79532	0.73928	0.868385	0.348622	-6.374
Kid. Cortex	Mouse	R3hdm1	R3hdm1	E9Q9Q2	R3H domain containing 1	0.10462	10.1134	0.441446	0.668376	0.805217	-6.29316
Kid. Cortex	Mouse	Ddx55	Ddx55	E9Q9T6;Q6ZPL9	ATP-dependent RNA helicase;ATP-dependent RNA helicase DDX55	-0.0505975	9.92374	0.551204	0.755779	-0.61909	-6.42998
Kid. Cortex	Mouse	Smarcd3	Smarcd3	A0A0G2JG60;Q6P9Z1	SWI/SNF related, matrix associated, actin dependent regulator of chromatin, subfamily d, member 3;SWI/SNF-related matrix-associated actin-dependent regulator of chromatin subfamily D member 3	0.200096	9.50179	0.289602	0.526855	1.12523	-5.98865
Kid. Cortex	Mouse	Cald1	Cald1	E9QA15	Caldesmon 1	0.504273	14.6734	0.000154055	0.011573	6.22548	1.35819
Kid. Cortex	Mouse	Cald1	Cald1	E9QA16;Q8VCQ8	Caldesmon 1	-0.495222	10.5378	0.716118	0.855077	-0.375315	-6.55857
Kid. Cortex	Mouse	Gtpbp2	Gtpbp2	E9QA45;Q3UJK4	GTP binding protein 2;GTP-binding protein 2	0.778682	8.55088	0.0231238	0.130106	2.73263	-3.68381
Kid. Cortex	Mouse	Kat14	Kat14	E9QA90;Q8CID0	Lysine acetyltransferase 14;Cysteine-rich protein 2-binding protein	0.723139	9.65355	0.00110493	0.025499	4.96129	-0.496012
Kid. Cortex	Mouse	Gm49486	Gm49486	E9QAC6	Galectin	-0.0428695	11.6609	0.505506	0.721578	-0.693486	-6.37913
Kid. Cortex	Mouse	Ccdc93	Ccdc93	E9QAD4	Coiled-coil domain-containing protein 93	0.0682586	12.5062	0.856756	0.931524	0.18642	-6.56401
Kid. Cortex	Mouse	Btaf1	Btaf1	E9QAE3	B-TFIID TATA-box binding protein associated factor 1	0.136982	11.2726	0.129137	0.339627	1.67059	-5.31054
Kid. Cortex	Mouse	Tanc1	Tanc1	E9QAF9	Tetratricopeptide repeat, ankyrin repeat and coiled-coil containing 1	0.0643412	11.4901	0.631989	0.80668	0.495693	-6.50253
Kid. Cortex	Mouse	Mkrn1	Mkrn1	E9QAG7;F6S742;F6WPC3;Q8C5V4;Q99LD7;Q9QXP6	RING-type E3 ubiquitin transferase;RING-type E3 ubiquitin transferase (Fragment);Makorin, ring finger protein, 1 (Fragment);RING-type E3 ubiquitin transferase;RING-type E3 ubiquitin transferase;E3 ubiquitin-protein ligase makorin-1	0.186259	9.62363	0.616793	0.796842	0.527469	-6.28782
Kid. Cortex	Mouse	Arhgap17	Arhgap17	E9QAJ9;Q3UIA2	Rho GTPase activating protein 17;Rho GTPase-activating protein 17	0.229463	13.024	0.00264926	0.0398266	4.10683	-1.51232
Kid. Cortex	Mouse	S100a4	S100a4	A0A0G2JGD2;P07091	S100 calcium binding protein A4 (Fragment);Protein S100-A4	1.4357	10.9907	1.2347e-05	0.00342591	8.60123	3.82137
Kid. Cortex	Mouse	AW554918	AW554918;AW554918;Kiaa1328	E9QAK8;E9QPX6;Q6NZK5	Expressed sequence AW554918;Expressed sequence AW554918;Protein hinderin	0.26205	7.81326	0.109182	0.31091	1.77763	-5.15988
Kid. Cortex	Mouse	Egfl8	Egfl8	E9QAK9;Q6GUQ1	EGF-like domain 8 (Fragment);Epidermal growth factor-like protein 8	-0.178319	10.2035	0.692285	0.842355	-0.410398	-6.49118
Kid. Cortex	Mouse	Arhgap26	Arhgap26	E9QAQ3;F6T836;Q6ZQ82	Rho GTPase-activating protein 26	0.350897	11.2852	0.00756223	0.0705113	3.42543	-2.57128
Kid. Cortex	Mouse	Gsk3b	Gsk3b	E9QAQ5;Q9WV60	[tau protein] kinase;Glycogen synthase kinase-3 beta	0.0808426	13.1033	0.247653	0.485953	1.23626	-5.86501
Kid. Cortex	Mouse	Chd4	Chd4	E9QAS4;E9QAS5;Q6PDQ2	DNA helicase;DNA helicase;Chromodomain-helicase-DNA-binding protein 4	0.170072	12.4674	0.0277532	0.144544	2.62125	-3.86271
Kid. Cortex	Mouse	Fmr1	Fmr1	E9QAT0	Fragile X messenger ribonucleoprotein 1	0.0413332	12.9175	0.548625	0.754646	0.623188	-6.42731
Kid. Cortex	Mouse	Sec16a	Sec16a	E9QAT4	Protein transport protein Sec16A	0.0444224	13.3833	0.528201	0.739358	0.656056	-6.40536
Kid. Cortex	Mouse	Mars1	Mars1	E9QB02;Q68FL6	Methionine--tRNA ligase, cytoplasmic;Methionine--tRNA ligase, cytoplasmic	0.0034593	13.7629	0.958135	0.979699	0.0539736	-6.6333
Kid. Cortex	Mouse	Mrps10	Mrps10	E9QJS0;G5E8U5;G5E8U8	28S ribosomal protein S10, mitochondrial;28S ribosomal protein S10, mitochondrial;28S ribosomal protein S10, mitochondrial	-0.161687	12.8302	0.0683676	0.237641	-2.06995	-4.72805
Kid. Cortex	Mouse	Naf1	Naf1	E9QJT2;Q3UMQ8	H/ACA ribonucleoprotein complex non-core subunit NAF1	-0.241444	9.33199	0.616346	0.796842	-0.518901	-6.49003
Kid. Cortex	Mouse	Krit1	Krit1	A0A0G2JGG7;Q6S5J6	KRIT1, ankyrin repeat containing;Krev interaction trapped protein 1	-0.117233	12.3285	0.272098	0.509202	-1.16987	-5.93995
Kid. Cortex	Mouse	Acyp1	Acyp1	E9QJT5;P56376	Acylphosphatase;Acylphosphatase-1	-0.0979831	13.0126	0.363806	0.596638	-0.956497	-6.15942
Kid. Cortex	Mouse	Tent4b	Tent4b	E9QJT6;F8WI26;Q68ED3	Terminal nucleotidyltransferase 4B	-0.0767821	10.3936	0.389852	0.621352	-0.903399	-6.20855
Kid. Cortex	Mouse	Sh3bp2	Sh3bp2	E9QJU7;Q3UD40;Q5U3L0	SH3-domain binding protein 2	0.621197	9.32623	0.306014	0.542223	1.08527	-6.03103
Kid. Cortex	Mouse	Trp53bp2	Trp53bp2;Tp53bp2	E9QJU8;Q8CG79	Transformation related protein 53 binding protein 2;Apoptosis-stimulating of p53 protein 2	-0.0771197	11.4411	0.405861	0.636751	-0.872015	-6.23649
Kid. Cortex	Mouse	Prpf39	Prpf39	E9QJV4;Q8K2Z2	Pre-mRNA processing factor 39;Pre-mRNA-processing factor 39	-0.0230469	12.5867	0.784108	0.894676	-0.282286	-6.59157
Kid. Cortex	Mouse	Mgst1	Mgst1	E9QJW0;Q91VS7	glutathione transferase;Microsomal glutathione S-transferase 1	0.173619	12.5682	0.521087	0.734577	0.667683	-6.39736
Kid. Cortex	Mouse	Stat2	Stat2	E9QJX9;Q9QXJ2	Signal transducer and activator of transcription	0.617487	10.7569	0.00111686	0.02565	4.70201	-0.63701
Kid. Cortex	Mouse	Neo1	Neo1	E9QK04;P97798;Q7TQG5	Neogenin	-0.0390628	10.4574	0.788965	0.89721	-0.275752	-6.59354
Kid. Cortex	Mouse	Ngef	Ngef	E9QK62;Q8CHT1	Neuronal guanine nucleotide exchange factor;Ephexin-1	-0.393046	11.0334	0.0220698	0.127483	-2.76115	-3.63792
Kid. Cortex	Mouse	Utp20	Utp20	E9QK83;Q5XG71	UTP20 small subunit processome component;Small subunit processome component 20 homolog	0.259707	11.0769	0.0233171	0.13059	2.72755	-3.69199
Kid. Cortex	Mouse	Dhx30	Dhx30	A0A0G2JGL8;Q99PU8	RNA helicase;ATP-dependent RNA helicase DHX30	-0.101703	12.8782	0.212986	0.447229	-1.34033	-5.74177
Kid. Cortex	Mouse	Mdc1	Mdc1	E9QK89;Q5PSV9	Mediator of DNA damage checkpoint protein 1	0.344364	10.488	0.00458841	0.0541239	3.74516	-2.06789
Kid. Cortex	Mouse	Habp4	Habp4	E9QKB2;Q9JKS5	Hyaluronic acid binding protein 4;Intracellular hyaluronan-binding protein 4	0.0792547	12.0269	0.626627	0.803712	0.503615	-6.49832
Kid. Cortex	Mouse	Nol8	Nol8	E9QKD1;Q3UHX0	Nucleolar protein 8	-0.227221	9.49859	0.527238	0.73866	-0.670921	-6.19576
Kid. Cortex	Mouse	Gtf2h1	Gtf2h1	E9QKD9;G3X8R4;Q9DBA9	General transcription factor II H, polypeptide 1;General transcription factor II H, polypeptide 1;General transcription factor IIH subunit 1	0.782649	9.14813	0.0269027	0.142368	2.70407	-3.73826
Kid. Cortex	Mouse	Trmt11	Trmt11	E9QKG3	tRNA (guanine(10)-N2)-methyltransferase homolog	-0.163716	10.9276	0.0547434	0.209754	-2.20664	-4.51819
Kid. Cortex	Mouse	Akt1s1	Akt1s1	E9QKI4;E9QKI5;Q9D1F4	AKT1 substrate 1 (proline-rich);AKT1 substrate 1 (proline-rich);Proline-rich AKT1 substrate 1	-0.0582035	12.797	0.513141	0.728264	-0.680782	-6.38818
Kid. Cortex	Mouse	Atp11c	Atp11c	E9QKK8;F6Q8D3;Q9QZW0	Phospholipid-transporting ATPase;Phospholipid-transporting ATPase;Phospholipid-transporting ATPase 11C	-0.121123	12.0787	0.225909	0.460565	-1.29999	-5.79035
Kid. Cortex	Mouse	Rad54l2	Rad54l2	E9QKL0;Q99NG0	RAD54 like 2 (S. cerevisiae);Helicase ARIP4	0.0500021	10.1289	0.728748	0.862926	0.35779	-6.56548
Kid. Cortex	Mouse	Fgd5	Fgd5	E9QKY4;E9QLU9	FYVE, RhoGEF and PH domain containing 5;FYVE, RhoGEF and PH domain containing 5	0.232911	10.3389	0.0137042	0.0985768	3.05396	-3.16609
Kid. Cortex	Mouse	Ipo9	Ipo9	E9QKZ2;Q91YE6	Importin 9;Importin-9	0.1685	12.6363	0.0642931	0.228223	2.10784	-4.6703
Kid. Cortex	Mouse	Nras	Nras	A0A0G2JGP4;P08556;Q9D091	Neuroblastoma ras oncogene (Fragment);GTPase NRas;Neuroblastoma ras oncogene	-0.105598	14.9381	0.220845	0.455503	-1.31556	-5.77171
Kid. Cortex	Mouse	Nupl2	Nupl2	E9QL43	Nucleoporin like 2	-0.00179325	9.29077	0.98821	0.994996	-0.0151925	-6.63477
Kid. Cortex	Mouse	Cog3	Cog3	E9QL65	Conserved oligomeric Golgi complex subunit 3	0.164653	11.653	0.0522821	0.204222	2.23482	-4.47443
Kid. Cortex	Mouse	Lpgat1	Lpgat1	E9QL80	Lysophosphatidylglycerol acyltransferase 1	0.044461	10.5749	0.8105	0.908488	0.246934	-6.60171
Kid. Cortex	Mouse	Inf2	Inf2	E9QLA5;Q0GNC1	Inverted formin, FH2 and WH2 domain containing;Inverted formin-2	1.06001	10.192	6.83456e-05	0.00766355	6.92982	2.16433
Kid. Cortex	Mouse	Lyplal1	Lyplal1	E9QLB2;Q3UFF7	palmitoyl-protein hydrolase;Lysophospholipase-like protein 1	-0.38071	14.3619	0.197873	0.428911	-1.39024	-5.68032
Kid. Cortex	Mouse	Coq8b	Coq8b	E9QLB8;Q566J8	Coenzyme Q8B;Atypical kinase COQ8B, mitochondrial	-0.0745153	12.7385	0.305407	0.541954	-1.08672	-6.02951
Kid. Cortex	Mouse	Kansl1l	Kansl1l	E9QLE2;F6ULJ7;Q5DTI6	KAT8 regulatory NSL complex subunit 1-like;KAT8 regulatory NSL complex subunit 1-like (Fragment);KAT8 regulatory NSL complex subunit 1-like protein	0.0927984	8.34082	0.725638	0.860956	0.362093	-6.56381
Kid. Cortex	Mouse	Cmya5	Cmya5	E9QLJ0;Q70KF4	Cardiomyopathy associated 5;Cardiomyopathy-associated protein 5	0.654498	10.6068	0.157785	0.379667	1.55826	-5.41588
Kid. Cortex	Mouse	Brat1	Brat1	E9QLK3;Q8C3R1	BRCA1-associated ATM activator 1	0.0259348	9.51992	0.77464	0.889208	0.295062	-6.58758
Kid. Cortex	Mouse	Teddm1a	Teddm1a;Teddm1a;Teddm1b	E9QLK8;Q810U2;Q8CC62	Transmembrane epididymal protein 1A;Transmembrane epididymal protein 1A;Transmembrane epididymal protein 1B	1.24127	10.101	0.080712	0.260921	2.09787	-4.53041
Kid. Cortex	Mouse	Shisa5	Shisa5	A0A0G2JGP8;Q9D7I0	Shisa family member 5;Protein shisa-5	0.152316	9.86901	0.131333	0.342565	1.68067	-5.25212
Kid. Cortex	Mouse	Dnm3	Dnm3	E9QLL2;Q8BZ98	dynamin GTPase;Dynamin-3	0.0983427	10.5952	0.286384	0.524505	1.13327	-5.97998
Kid. Cortex	Mouse	Pde3b	Pde3b	E9QLQ3;Q61409	Phosphodiesterase;cGMP-inhibited 3',5'-cyclic phosphodiesterase 3B	-0.239014	9.3136	0.276821	0.514361	-1.17925	-5.80012
Kid. Cortex	Mouse	Rab29	Rab29	E9QLQ7;Q91YQ1	Ras-related protein Rab;Ras-related protein Rab-7L1	0.304149	10.4693	0.0776375	0.255512	1.99126	-4.84683
Kid. Cortex	Mouse	Pik3c3	Pik3c3	E9QLS6;Q6PF93	Phosphatidylinositol 3-kinase catalytic subunit type 3	0.0573169	12.0361	0.368297	0.60098	0.947148	-6.16824
Kid. Cortex	Mouse	Arnt	Arnt	E9QLT6;P53762;Q3ULM2;Q8CEC2	Aryl hydrocarbon receptor nuclear translocator	0.233707	8.98861	0.129739	0.340232	1.66761	-5.31467
Kid. Cortex	Mouse	Slc12a2	Slc12a2	E9QM38	Solute carrier family 12, member 2	0.135198	12.776	0.473313	0.696272	0.748414	-6.33828
Kid. Cortex	Mouse	Fbxo34	Fbxo34	E9QM55	F-box protein 34	-0.38747	8.14152	0.0909766	0.27881	-2.4585	-4.05261
Kid. Cortex	Mouse	Ercc5	Ercc5	E9QM61;P35689	Excision repair cross-complementing rodent repair deficiency, complementation group 5;DNA excision repair protein ERCC-5	0.232132	9.5562	0.095594	0.287778	1.86143	-5.03888
Kid. Cortex	Mouse	Atxn2	Atxn2	E9QM77	Ataxin 2	-0.0326411	11.9118	0.802108	0.903758	-0.258136	-6.59864
Kid. Cortex	Mouse	Relch	Relch	E9QM90	RAB11 binding and LisH domain, coiled-coil and HEAT repeat containing	-0.0400968	12.3561	0.498199	0.715872	-0.705756	-6.37024
Kid. Cortex	Mouse	Ighv1-66	Ighv1-66;Ighv1-84	A0A075B5X5;A0A075B5Y5	Immunoglobulin heavy variable 1-66 (Fragment);Immunoglobulin heavy variable 1-84 (Fragment)	0.898855	8.24722	0.3416	0.57696	1.05046	-5.57068
Kid. Cortex	Mouse	Nub1	Nub1	A0A0G2JGQ4;P54729	Negative regulator of ubiquitin-like proteins 1;NEDD8 ultimate buster 1	0.047958	12.562	0.58992	0.780106	0.558813	-6.46729
Kid. Cortex	Mouse	Fam172a	Fam172a	E9QMA2;Q3TNH5	Family with sequence similarity 172, member A;Cotranscriptional regulator FAM172A	0.106342	11.0871	0.229308	0.464012	1.2897	-5.80258
Kid. Cortex	Mouse	Naa30	Naa30	E9QMB7;Q8CES0	N(alpha)-acetyltransferase 30, NatC catalytic subunit;N-alpha-acetyltransferase 30	0.180657	11.7333	0.0386215	0.172184	2.41981	-4.18389
Kid. Cortex	Mouse	Trim33	Trim33	E9QME5;E9QP19;Q99PP7	Tripartite motif-containing 33;Tripartite motif-containing 33;E3 ubiquitin-protein ligase TRIM33	0.127617	10.9667	0.0973921	0.290894	1.84972	-5.05593
Kid. Cortex	Mouse	Ikbip	Ikbip	E9QMH7	IKBKB interacting protein	0.351664	10.7988	0.0200113	0.121251	2.82106	-3.54141
Kid. Cortex	Mouse	Asap1	Asap1	E9QMJ1;E9QN63;H3BJY2;H3BL41;Q9QWY8	ArfGAP with SH3 domain, ankyrin repeat and PH domain1;ArfGAP with SH3 domain, ankyrin repeat and PH domain1;ArfGAP with SH3 domain, ankyrin repeat and PH domain1;ArfGAP with SH3 domain, ankyrin repeat and PH domain1;Arf-GAP with SH3 domain, ANK repeat and PH domain-containing protein 1	0.227736	11.4359	0.0482433	0.195094	2.28402	-4.3977
Kid. Cortex	Mouse	Axin1	Axin1	E9QMJ8;O35625;Q14DJ8	Axin-1;Axin-1;Axin 1	-0.00548581	11.9957	0.94301	0.972919	-0.073508	-6.63195
Kid. Cortex	Mouse	Dglucy	Dglucy	E9QMK9;Q8BH86	D-glutamate cyclase;D-glutamate cyclase, mitochondrial	-0.124101	14.9269	0.217427	0.451775	-1.32624	-5.75884
Kid. Cortex	Mouse	Zfp638	Zfp638;Znf638	E9QML5;Q61464	Zinc finger protein 638	0.0818978	11.976	0.156128	0.377621	1.54758	-5.4776
Kid. Cortex	Mouse	Mark2	Mark2	E9QMP6;Q05512	non-specific serine/threonine protein kinase;Serine/threonine-protein kinase MARK2	-0.00451884	12.8151	0.936967	0.969729	-0.0813201	-6.63128
Kid. Cortex	Mouse	Dock9	Dock9	E9QMR2	Dedicator of cytokinesis 9	-0.212772	10.8013	0.247256	0.485496	-1.23738	-5.86372
Kid. Cortex	Mouse	Dclk1	Dclk1	A0A0G2JGQ6;Q9JLM8	Doublecortin-like kinase 1;Serine/threonine-protein kinase DCLK1	1.19836	9.9166	0.000189874	0.0120196	7.12218	1.34462
Kid. Cortex	Mouse	Rps6kc1	Rps6kc1	E9QMX4;Q8BLK9	non-specific serine/threonine protein kinase;Ribosomal protein S6 kinase delta-1	-0.157635	9.53855	0.140373	0.357705	-1.61681	-5.38443
Kid. Cortex	Mouse	Arhgap30	Arhgap30	E9QMX7;Q640N3	Rho GTPase activating protein 30;Rho GTPase-activating protein 30	0.923312	9.70514	0.038129	0.171257	2.79691	-3.5203
Kid. Cortex	Mouse	Cd200	Cd200	E9QMY1;O54901;Q80VX2	CD200 antigen;OX-2 membrane glycoprotein;CD200 antigen	-0.00574462	12.8444	0.951536	0.976922	-0.0624925	-6.63276
Kid. Cortex	Mouse	Pdgfrb	Pdgfrb	E9QN12;P05622	Platelet-derived growth factor receptor beta	0.456542	11.7038	0.00678489	0.0670122	3.49418	-2.46221
Kid. Cortex	Mouse	Srgap3	Srgap3	E9QN14;F8VPQ4;Q812A2	SLIT-ROBO Rho GTPase activating protein 3;SLIT-ROBO Rho GTPase activating protein 3;SLIT-ROBO Rho GTPase-activating protein 3	-0.152062	9.06556	0.552048	0.756103	-0.61775	-6.43084
Kid. Cortex	Mouse	Nop2	Nop2	E9QN31	NOP2 nucleolar protein	0.114652	12.1791	0.236368	0.472865	1.26873	-5.82729
Kid. Cortex	Mouse	D2hgdh	D2hgdh	E9QN44;Q8CIM3	D-2-hydroxyglutarate dehydrogenase;D-2-hydroxyglutarate dehydrogenase, mitochondrial	-0.361571	11.6066	0.000962804	0.0240113	-4.808	-0.486664
Kid. Cortex	Mouse	Lamb1	Lamb1	E9QN70;P02469	Laminin B1;Laminin subunit beta-1	-0.0496912	15.0631	0.705972	0.849479	-0.389486	-6.55275
Kid. Cortex	Mouse	Abhd14b	Abhd14b	E9QN99	Abhydrolase domain containing 14b	-0.209144	17.0864	0.127603	0.337054	-1.67827	-5.2999
Kid. Cortex	Mouse	Sorbs1	Sorbs1	E9QNA7	Sorbin and SH3 domain containing 1	-0.0157184	13.4653	0.797389	0.902174	-0.26445	-6.59685
Kid. Cortex	Mouse	Camk2d	Camk2d	A0A0G2JGS4;E9Q1T1;E9Q1W0;Q6PHZ2	calcium/calmodulin-dependent protein kinase;calcium/calmodulin-dependent protein kinase;calcium/calmodulin-dependent protein kinase;Calcium/calmodulin-dependent protein kinase type II subunit delta	0.181691	13.283	0.0325426	0.158989	2.5242	-4.01792
Kid. Cortex	Mouse	Snx13	Snx13	E9QNG6;Q6PHS6	Sorting nexin 13;Sorting nexin-13	0.0330014	10.6555	0.65681	0.822068	0.459446	-6.52096
Kid. Cortex	Mouse	Acbd5	Acbd5	E9QNH7;Q5XG73	Acyl-CoA-binding domain-containing protein 5	-0.577381	9.77756	0.214249	0.448404	-1.3363	-5.74666
Kid. Cortex	Mouse	Sult1a1	Sult1a1	E9QNL5;Q91W19	Sulfotransferase	-0.0972911	11.5337	0.312291	0.549667	-1.07043	-6.04647
Kid. Cortex	Mouse	Dhx9	Dhx9	E9QNN1	RNA helicase	0.118053	14.5279	0.0709968	0.243319	2.04664	-4.7634
Kid. Cortex	Mouse	Taf12	Taf12	E9QNT5;Q8VE65	Transcription initiation factor TFIID subunit 12	-1.0214	7.95027	0.621581	0.799814	-0.511102	-6.49429
Kid. Cortex	Mouse	Med23	Med23	E9QNV2;F8WJB0;Q80YQ2	Mediator of RNA polymerase II transcription subunit 23	0.138867	10.6913	0.170242	0.395032	1.49065	-5.55246
Kid. Cortex	Mouse	Pafah2	Pafah2	E9QNW6;Q8VDG7	Platelet-activating factor acetylhydrolase;Platelet-activating factor acetylhydrolase 2, cytoplasmic	-0.0256197	14.1193	0.767553	0.884436	-0.304659	-6.58447
Kid. Cortex	Mouse	Igf1r	Igf1r	E9QNX9;Q60751	Tyrosine-protein kinase receptor;Insulin-like growth factor 1 receptor	0.0414431	11.9949	0.680654	0.835325	0.425232	-6.53713
Kid. Cortex	Mouse	Cul9	Cul9	E9QP09;S4R1Y1	Cullin 9	-0.0367747	11.2395	0.931906	0.96752	-0.088173	-6.57886
Kid. Cortex	Mouse	Arap2	Arap2	E9QP44;Q8BZ05	ArfGAP with RhoGAP domain, ankyrin repeat and PH domain 2;Arf-GAP with Rho-GAP domain, ANK repeat and PH domain-containing protein 2	-0.0668709	9.95375	0.489061	0.710122	-0.721259	-6.35882
Kid. Cortex	Mouse	F3	F3	A0A0G2JGS5;A0A0R4J088;P20352	Coagulation factor III (Fragment);Tissue factor;Tissue factor	0.234001	9.54019	0.263542	0.501261	1.19253	-5.9147
Kid. Cortex	Mouse	Syne2	Syne2	E9QP46;Q6ZWQ0	Spectrin repeat containing, nuclear envelope 2;Nesprin-2	0.177982	14.932	0.0251594	0.136869	2.68111	-3.76664
Kid. Cortex	Mouse	Ehbp1l1	Ehbp1l1	E9QP49	EH domain binding protein 1-like 1	0.287347	10.1016	0.0993919	0.294053	1.83694	-5.07449
Kid. Cortex	Mouse	Med16	Med16	E9QP84;G3UW74;Q6PGF3	Mediator of RNA polymerase II transcription subunit 16	0.126742	10.7808	0.27493	0.51261	1.1625	-5.94809
Kid. Cortex	Mouse	Ric1	Ric1	E9QPA1;Q69ZJ7	Protein RIC1 homolog;Guanine nucleotide exchange factor subunit RIC1	0.253583	10.0204	0.0249022	0.136013	2.68738	-3.75656
Kid. Cortex	Mouse	Mettl14	Mettl14	E9QPC5;G3UYS3;Q3UIK4	N6-adenosine-methyltransferase non-catalytic subunit	-0.165374	10.6715	0.207892	0.441421	-1.35681	-5.72164
Kid. Cortex	Mouse	Pcx	Pcx	E9QPD7;G5E8R3	Pyruvate carboxylase	0.0361088	14.5123	0.785636	0.895116	0.28023	-6.5922
Kid. Cortex	Mouse	Pds5a	Pds5a	E9QPI5;Q6A026	PDS5 cohesin associated factor A;Sister chromatid cohesion protein PDS5 homolog A	0.176171	12.1498	0.0384787	0.171856	2.42207	-4.18031
Kid. Cortex	Mouse	Cgref1	Cgref1	E9QPK1;Q8R1U2	Cell growth regulator with EF hand domain 1;Cell growth regulator with EF hand domain protein 1	-0.109825	12.3705	0.583408	0.776167	-0.568794	-6.46135
Kid. Cortex	Mouse	Mcf2l	Mcf2l	E9QPM7;Q64096	Mcf.2 transforming sequence-like;Guanine nucleotide exchange factor DBS	0.0250269	10.5113	0.749655	0.874606	0.329037	-6.57612
Kid. Cortex	Mouse	Vwf	Vwf	E9QPU1;Q8CIZ8	von Willebrand factor	0.914094	11.3123	0.000267066	0.0140172	5.77687	0.807427
Kid. Cortex	Mouse	Fubp1	Fubp1	A0A0G2JGW9	Far upstream element (FUSE) binding protein 1	0.129971	14.2441	0.118126	0.324269	1.72761	-5.23086
Kid. Cortex	Mouse	Apbb2	Apbb2	E9QPX0;Q3TIZ5;Q9DBR4	Amyloid beta (A4) precursor protein-binding, family B, member 2;Amyloid beta (A4) precursor protein-binding, family B, member 2;Amyloid beta precursor protein binding family B member 2	0.113819	10.5824	0.288099	0.526029	1.12898	-5.98461
Kid. Cortex	Mouse	Col18a1	Col18a1	E9QPX1;P39061	Collagen, type XVIII, alpha 1;Collagen alpha-1(XVIII) chain	0.562309	14.9642	0.000622165	0.0197276	5.12679	-0.0448428
Kid. Cortex	Mouse	Ndufs4	Ndufs4	E9QPX3;Q9CXZ1	NADH dehydrogenase [ubiquinone] iron-sulfur protein 4, mitochondrial;NADH dehydrogenase [ubiquinone] iron-sulfur protein 4, mitochondrial	-0.306724	16.0364	0.00656036	0.0658177	-3.51558	-2.42835
Kid. Cortex	Mouse	Akap9	Akap9	E9QQ10	A kinase (PRKA) anchor protein (yotiao) 9	-0.024131	14.3521	0.746359	0.873149	-0.333549	-6.57451
Kid. Cortex	Mouse	Eif2ak3	Eif2ak3	E9QQ30;Q9Z2B5	Eukaryotic translation initiation factor 2 alpha kinase 3;Eukaryotic translation initiation factor 2-alpha kinase 3	0.0761895	9.99518	0.496728	0.714398	0.708238	-6.36843
Kid. Cortex	Mouse	Ddhd1	Ddhd1	E9QQ38;F8WIJ5	DDHD domain containing 1	0.0701937	10.6403	0.321967	0.558549	1.04799	-6.0695
Kid. Cortex	Mouse	Raph1	Raph1	F2Z3U3	Ras association (RalGDS/AF-6) and pleckstrin homology domains 1	0.417924	10.9701	0.0031934	0.0441746	3.9825	-1.70145
Kid. Cortex	Mouse	Zfp652	Zfp652;Zfp652;Znf652	F2Z3V9;F2Z443;Q5DU09	Zinc finger protein 652	0.369915	9.71643	0.0136728	0.0984258	3.05537	-3.16381
Kid. Cortex	Mouse	Tmem82	Tmem82	F2Z3W9;Q8R115	Transmembrane protein 82	0.451519	11.253	0.322316	0.558849	1.09781	-5.70836
Kid. Cortex	Mouse	Pdpk1	Pdpk1	F2Z3X6;Q3TRL2;Q9Z2A0	3-phosphoinositide-dependent protein kinase 1	-0.117141	11.0411	0.0682985	0.237487	-2.07058	-4.7271
Kid. Cortex	Mouse	Atp1a3	Atp1a3	A0A0G2JGX4;Q6PIC6;Q8VCE0	Sodium/potassium-transporting ATPase subunit alpha;Sodium/potassium-transporting ATPase subunit alpha-3;Sodium/potassium-transporting ATPase subunit alpha	0.181779	11.3915	0.352866	0.587248	0.979628	-6.13731
Kid. Cortex	Mouse	Herc6	Herc6	F2Z461	E3 ISG15--protein ligase Herc6	0.127614	10.0061	0.669333	0.828216	0.445611	-6.30972
Kid. Cortex	Mouse	Vdac1	Vdac1	F2Z471	Voltage-dependent anion channel 1	-0.192527	17.0159	0.0299912	0.150683	-2.57396	-3.93843
Kid. Cortex	Mouse	Dgke	Dgke	F2Z490;Q9R1C6	diacylglycerol kinase (ATP);Diacylglycerol kinase epsilon	0.397319	9.43244	0.21486	0.44889	1.38668	-5.49722
Kid. Cortex	Mouse	Smarca2	Smarca2	F2Z4A9;H3BLH0;Q6DIC0	SWI/SNF related, matrix associated, actin dependent regulator of chromatin, subfamily a, member 2;SWI/SNF related, matrix associated, actin dependent regulator of chromatin, subfamily a, member 2;Probable global transcription activator SNF2L2	0.063344	12.7099	0.435721	0.663932	0.81571	-6.28451
Kid. Cortex	Mouse	Bend5	Bend5	F6Q2G7;Q8C6D4	BEN domain containing 5 (Fragment);BEN domain-containing protein 5	0.273249	10.3348	0.287627	0.52594	1.13016	-5.98334
Kid. Cortex	Mouse	Ubr3	Ubr3	F6QC57	E3 ubiquitin-protein ligase	-0.434543	10.0581	0.266895	0.504718	-1.18358	-5.92472
Kid. Cortex	Mouse	Pde4d	Pde4d	F6QFD1	Phosphodiesterase (Fragment)	-0.0932635	11.3572	0.351328	0.585517	-0.982923	-6.13412
Kid. Cortex	Mouse	Kctd7	Kctd7	F6QXA3;Q8BJK1	Potassium channel tetramerisation domain containing 7 (Fragment);BTB/POZ domain-containing protein KCTD7	-0.00816879	7.73813	0.965155	0.982788	-0.0450715	-6.58203
Kid. Cortex	Mouse	Slc35a1	Slc35a1	F6R7Y0;Q61420	Solute carrier family 35 (CMP-sialic acid transporter), member 1 (Fragment);CMP-sialic acid transporter	0.168171	10.7938	0.529037	0.740093	0.676	-6.08004
Kid. Cortex	Mouse	Ift52	Ift52	F6RBL8;Q62559	Intraflagellar transport 52 (Fragment);Intraflagellar transport protein 52 homolog	-0.0364757	10.6639	0.716287	0.855077	-0.37508	-6.55866
Kid. Cortex	Mouse	Hycc1	Hycc1	A0A0G2JH12	Family with sequence similarity 126, member A	0.670132	9.35353	0.00310598	0.043534	4.17369	-1.54074
Kid. Cortex	Mouse	Gls	Gls	F6RDM4	glutaminase (Fragment)	-0.575682	11.0097	0.166567	0.39027	-1.50506	-5.53366
Kid. Cortex	Mouse	Lancl2	Lancl2	F6RJV6;Q9JJK2	LanC (bacterial lantibiotic synthetase component C)-like 2 (Fragment);LanC-like protein 2	0.0502277	11.7681	0.611875	0.793998	0.52559	-6.48633
Kid. Cortex	Mouse	Kazn	Kazn	F6RLJ7;G3UY74;G3UZT9;Q69ZS8	Kazrin (Fragment);Kazrin, periplakin interacting protein;Kazrin, periplakin interacting protein;Kazrin	0.0168466	10.9516	0.905003	0.955214	0.122749	-6.62667
Kid. Cortex	Mouse	Sun1	Sun1	F6RMJ1	Sad1 and UNC84 domain containing 1 (Fragment)	-0.0751254	10.0466	0.879011	0.943134	-0.157162	-6.56954
Kid. Cortex	Mouse	Mprip	Mprip	F6RND9	Myosin phosphatase Rho interacting protein (Fragment)	-0.218837	8.92809	0.256959	0.494763	-1.21038	-5.89458
Kid. Cortex	Mouse	Rnaseh2a	Rnaseh2a	F6RP29;Q05C51;Q9CWY8	Ribonuclease;Ribonuclease;Ribonuclease H2 subunit A	0.241358	11.5698	0.0329773	0.159869	2.51611	-4.03082
Kid. Cortex	Mouse	Efnb2	Efnb2	F6RSU6;P52800	Ephrin B2 (Fragment);Ephrin-B2	-0.102702	8.65078	0.749625	0.874606	-0.334165	-6.32237
Kid. Cortex	Mouse	Ccnl2	Ccnl2	F6RXL0;Q9JJA7	Cyclin L2 (Fragment);Cyclin-L2	-0.058436	9.06475	0.757883	0.878116	-0.330106	-6.18119
Kid. Cortex	Mouse	Cad	Cad	F6S3Z3	Carbamoyl-phosphate synthetase 2, aspartate transcarbamylase, and dihydroorotase (Fragment)	-0.027922	11.4757	0.86353	0.935167	-0.176865	-6.61784
Kid. Cortex	Mouse	Epb41	Epb41	F6S4K9	Erythrocyte membrane protein band 4.1 (Fragment)	-0.31215	13.0749	0.0714401	0.243438	-2.04279	-4.76922
Kid. Cortex	Mouse	Ints1	Ints1	A0A0G2JH17;K3W4P2;Q6P4S8	Integrator complex subunit 1	0.113092	11.7323	0.163672	0.38651	1.51661	-5.51853
Kid. Cortex	Mouse	3110009E18Rik	3110009E18Rik;	F6SAX2;Q9CRW3	RIKEN cDNA 3110009E18 gene (Fragment);UPF0538 protein C2orf76 homolog	0.40265	9.21528	0.0307759	0.153013	2.55822	-3.9636
Kid. Cortex	Mouse	Gak	Gak	F6SLK1	Cyclin G associated kinase (Fragment)	-0.538211	9.21528	0.20809	0.441421	-1.36936	-5.62493
Kid. Cortex	Mouse	Mycbp2	Mycbp2	F6SMY7;Q7TPH6	RCR-type E3 ubiquitin transferase (Fragment);E3 ubiquitin-protein ligase MYCBP2	0.120461	10.895	0.0950763	0.287036	1.86484	-5.03391
Kid. Cortex	Mouse	Ube2j1	Ube2j1	F6SPK0	Ubiquitin-conjugating enzyme E2J 1 (Fragment)	0.00852356	11.6148	0.911501	0.957498	0.11431	-6.62776
Kid. Cortex	Mouse	Fam234a	Fam234a	F6SQM4;Q8C0Z1	Family with sequence similarity 234, member A;Protein FAM234A	-0.0372074	13.4152	0.554534	0.757742	-0.613813	-6.43338
Kid. Cortex	Mouse	Clcn7	Clcn7	F6SUM2;O70496	Chloride channel protein;H(+)/Cl(-) exchange transporter 7	0.0649389	11.706	0.649363	0.816912	0.470249	-6.51561
Kid. Cortex	Mouse	Gpsm1	Gpsm1	F6SX81;Q6IR34	G-protein signalling modulator 1 (AGS3-like, C. elegans) (Fragment);G-protein-signaling modulator 1	-0.20783	11.5347	0.199822	0.431372	-1.4404	-5.43295
Kid. Cortex	Mouse	Hcfc2	Hcfc2	F6T088;Q9D968	Host cell factor C2 (Fragment);Host cell factor 2	0.0869371	10.5536	0.489868	0.71043	0.719883	-6.35984
Kid. Cortex	Mouse	Fech	Fech	F6T2S0	Ferrochelatase	0.0187788	10.0687	0.956754	0.979098	0.0569988	-6.33207
Kid. Cortex	Mouse	Sec16a	Sec16a	F6T8X6	SEC16 homolog A, endoplasmic reticulum export factor (Fragment)	0.0860826	11.3416	0.531194	0.74171	0.651194	-6.40868
Kid. Cortex	Mouse	Elp6	Elp6	A0A0H2UH13;Q8BK75	Elongator complex protein 6	0.0180454	10.4514	0.86143	0.934367	0.17962	-6.61731
Kid. Cortex	Mouse	Bag1	Bag1	F6TCF9;Q60739	BAG family molecular chaperone regulator 1	-0.0175541	11.8551	0.812869	0.909727	-0.243777	-6.60255
Kid. Cortex	Mouse	Lmo7	Lmo7	F6TFN2	LIM domain only 7 (Fragment)	-0.0274186	10.2689	0.878559	0.942868	-0.157197	-6.62142
Kid. Cortex	Mouse	Fndc3a	Fndc3a	F6TLV3;Q8BX90	Fibronectin type III domain containing 3A (Fragment);Fibronectin type-III domain-containing protein 3A	0.00932314	11.4898	0.910852	0.957451	0.115153	-6.62766
Kid. Cortex	Mouse	Gm20671	Gm20671	F6TVX7	phosphatidylserine decarboxylase (Fragment)	-0.0314506	12.996	0.846568	0.926314	-0.199154	-6.61328
Kid. Cortex	Mouse	Gan	Gan	F6TZU3;Q8CA72	Giant axonal neuropathy (Fragment);Gigaxonin	0.18277	9.4524	0.590873	0.780109	0.559904	-6.41349
Kid. Cortex	Mouse	Gls	Gls	F6U529	glutaminase (Fragment)	0.162827	12.2959	0.49476	0.712707	0.711569	-6.36599
Kid. Cortex	Mouse	Larp1b	Larp1b	F6U5V1	La ribonucleoprotein domain family, member 1B	-0.0450051	11.1968	0.791098	0.898503	-0.272887	-6.59439
Kid. Cortex	Mouse	Dyrk1a	Dyrk1a	F6U6X3;Q61214	dual-specificity kinase;Dual specificity tyrosine-phosphorylation-regulated kinase 1A	0.0959303	10.6732	0.295475	0.532431	1.11073	-6.00416
Kid. Cortex	Mouse	Opa1	Opa1	F6U775	OPA1, mitochondrial dynamin like GTPase (Fragment)	0.0807681	9.49601	0.808558	0.907271	0.249523	-6.60101
Kid. Cortex	Mouse	Emid1	Emid1	F6U7K9;F6YMU2	EMI domain containing 1 (Fragment)	2.44184	5.2656	0.314883	0.552318	1.11671	-5.68896
Kid. Cortex	Mouse	Ubap2l	Ubap2l	A0A0H2UH17	Ubiquitin-associated protein 2-like	-0.329136	9.39075	0.168872	0.393125	-1.49599	-5.54551
Kid. Cortex	Mouse	Ergic3	Ergic3	F6UIS1;Q9CQE7	Endoplasmic reticulum-Golgi intermediate compartment protein (Fragment);Endoplasmic reticulum-Golgi intermediate compartment protein 3	0.165271	12.244	0.229632	0.464196	1.28872	-5.80373
Kid. Cortex	Mouse	Hck	Hck	F6UND7;P08103	Tyrosine-protein kinase;Tyrosine-protein kinase HCK	0.488251	11.1046	0.0864799	0.271543	1.9932	-4.75881
Kid. Cortex	Mouse	Amdhd2	Amdhd2	F6UP77;F7CUP3;Q8JZV7	N-acetylglucosamine-6-phosphate deacetylase	-0.011761	13.2957	0.934811	0.968868	-0.0841086	-6.63103
Kid. Cortex	Mouse	Slc5a10	Slc5a10	F6UXY4;Q5SWY8	Solute carrier family 5 (sodium/glucose cotransporter), member 10 (Fragment);Sodium/mannose cotransporter SLC5A10	-0.174186	13.8542	0.248778	0.487007	-1.23308	-5.86866
Kid. Cortex	Mouse	Atg2a	Atg2a	F6V3Y9	Autophagy related 2A (Fragment)	0.0177515	10.4586	0.822592	0.914406	0.230852	-6.60588
Kid. Cortex	Mouse	Tnks2	Tnks2	F6V619;Q3UES3	Tankyrase, TRF1-interacting ankyrin-related ADP-ribose polymerase 2 (Fragment);Poly [ADP-ribose] polymerase tankyrase-2	-0.203358	7.09149	0.573433	0.770533	-0.62995	-5.8181
Kid. Cortex	Mouse	Arhgef39	Arhgef39	F6V695;Q66JY6	Rho guanine nucleotide exchange factor (GEF) 39 (Fragment);Rho guanine nucleotide exchange factor 39	0.539883	8.02701	0.190388	0.419932	1.47603	-5.33614
Kid. Cortex	Mouse	Banp	Banp	F6V6B6;Q8VBU8	Protein BANP (Fragment);Protein BANP	0.0335524	10.0083	0.922551	0.962766	0.102225	-6.32789
Kid. Cortex	Mouse	Tmed2	Tmed2	F6V6T4;Q9R0Q3	Transmembrane p24 trafficking protein 2 (Fragment);Transmembrane emp24 domain-containing protein 2	0.0599755	11.5277	0.644167	0.814265	0.477823	-6.51178
Kid. Cortex	Mouse	Mff	Mff	F6VAL0;F7B1A4	Mitochondrial fission factor (Fragment)	-0.0236934	12.5788	0.777385	0.890536	-0.291352	-6.58876
Kid. Cortex	Mouse	Trav10n	Trav10n	A0A075B622	T cell receptor alpha variable 10N (Fragment)	-0.508155	10.0054	0.10421	0.30272	-1.8665	-4.85452
Kid. Cortex	Mouse	Ehmt1	Ehmt1	A0A0H2UH19;E9Q5A3;Q5DW34;Z4YJZ7	Euchromatic histone methyltransferase 1;Euchromatic histone methyltransferase 1;Histone-lysine N-methyltransferase EHMT1;Euchromatic histone methyltransferase 1	0.174656	9.99733	0.105964	0.305489	1.79656	-5.13276
Kid. Cortex	Mouse	Atf6	Atf6	F6VAN0	Cyclic AMP-dependent transcription factor ATF-6 alpha		8.42264
Kid. Cortex	Mouse	Trappc6a	Trappc6a	F6VKM0;Q78XR0	Trafficking protein particle complex 6A (Fragment);Trafficking protein particle complex subunit 6A	0.354056	10.1664	0.107783	0.308591	1.7858	-5.1482
Kid. Cortex	Mouse	Oasl2	Oasl2	F6VMV6;Q9Z2F2	2'-5' oligoadenylate synthetase-like 2 (Fragment);2'-5'-oligoadenylate synthase-like protein 2	1.45352	11.94	0.000228841	0.0129826	5.90066	0.962404
Kid. Cortex	Mouse	Lgals3bp	Lgals3bp	F6VRP8	Lectin, galactoside-binding, soluble, 3 binding protein (Fragment)	0.889994	10.2694	0.0509469	0.201209	2.25066	-4.44977
Kid. Cortex	Mouse	Hoxb8	Hoxb8;Hoxc8;Hoxb8	F6W0B3;P09025;P09632	Homeobox B8 (Fragment);Homeobox protein Hox-C8;Homeobox protein Hox-B8	0.0516338	10.0494	0.826106	0.916891	0.226191	-6.60703
Kid. Cortex	Mouse	Kri1	Kri1	F6WIU1;V9GXJ9	Protein KRI1 homolog	-0.0699581	10.4784	0.681506	0.83547	-0.424019	-6.53768
Kid. Cortex	Mouse	Cbx7	Cbx7	F6WJA6;F8WHN2;Q8VDS3	Chromobox 7 (Fragment);Chromobox 7;Chromobox protein homolog 7	-0.175637	11.7931	0.233435	0.469877	-1.27737	-5.81713
Kid. Cortex	Mouse	Usp34	Usp34	F6WJB7;Q6ZQ93	ubiquitinyl hydrolase 1 (Fragment);Ubiquitin carboxyl-terminal hydrolase 34	0.111379	10.6219	0.105962	0.305489	1.79657	-5.13275
Kid. Cortex	Mouse	Arhgef6	Arhgef6	F6WMJ3;Q8K4I3	Rac/Cdc42 guanine nucleotide exchange factor (GEF) 6;Rho guanine nucleotide exchange factor 6	0.334238	12.984	0.0489637	0.196328	2.27495	-4.41186
Kid. Cortex	Mouse	Ctss	Ctss	F6WR04;O70370	Cathepsin S	0.656336	12.8719	0.00977529	0.0806652	3.26401	-2.82877
Kid. Cortex	Mouse	Cpeb2	Cpeb2	A0A0H2UH22;Q812E0	Cytoplasmic polyadenylation element binding protein 2;Cytoplasmic polyadenylation element-binding protein 2	-0.089871	11.6555	0.198017	0.428948	-1.38975	-5.68094
Kid. Cortex	Mouse	Ccnl1	Ccnl1	F6WST0;F6WYR6;Q52KE7	Cyclin L1 (Fragment);Cyclin L1;Cyclin-L1	0.265352	9.16961	0.158818	0.380803	1.57692	-5.32261
Kid. Cortex	Mouse	Pde1a	Pde1a	F6X0V1;Q61481	Phosphodiesterase (Fragment);Dual specificity calcium/calmodulin-dependent 3',5'-cyclic nucleotide phosphodiesterase 1A	-0.183966	11.7851	0.244823	0.482409	-1.24428	-5.85576
Kid. Cortex	Mouse	Lsm14a	Lsm14a	F6X2V9	LSM14A mRNA processing body assembly factor (Fragment)	1.58012	8.18182	0.253104	0.491235	1.41082	-5.10517
Kid. Cortex	Mouse	Stx16	Stx16	F6X4N5;Q8BVI5	Syntaxin 16;Syntaxin-16	-0.0769391	11.7219	0.422051	0.652061	-0.841145	-6.26316
Kid. Cortex	Mouse	Cc2d1b	Cc2d1b	F6XC25;Q8BRN9	Coiled-coil and C2 domain containing 1B (Fragment);Coiled-coil and C2 domain-containing protein 1B	0.0151022	12.2329	0.818635	0.912136	0.236107	-6.60454
Kid. Cortex	Mouse	Macf1	Macf1	F6XCT0	Microtubule-actin crosslinking factor 1 (Fragment)	-0.09689	12.1164	0.270509	0.507324	-1.17404	-5.93534
Kid. Cortex	Mouse	Elmo2	Elmo2	F6XD63	Engulfment and cell motility 2 (Fragment)	0.153824	9.98823	0.428866	0.658788	0.839608	-6.13261
Kid. Cortex	Mouse	Plekho1	Plekho1	F6XQM2;Q9JIY0	Pleckstrin homology domain containing, family O member 1 (Fragment);Pleckstrin homology domain-containing family O member 1	0.154448	11.0605	0.268488	0.505935	1.17936	-5.92942
Kid. Cortex	Mouse	Bbs9	Bbs9	F6XSQ3	Bardet-Biedl syndrome 9 (human) (Fragment)	-0.436639	10.0548	0.325506	0.562231	-1.07061	-5.7918
Kid. Cortex	Mouse	Rnf121	Rnf121	F6XTP0;Q8R1Z9	Ring finger protein 121 (Fragment);E3 ubiquitin ligase Rnf121	0.0153102	10.9999	0.884702	0.946296	0.149179	-6.62276
Kid. Cortex	Mouse	Usp33	Usp33	A0A0H2UKB8;Q8R5K2	Ubiquitin carboxyl-terminal hydrolase;Ubiquitin carboxyl-terminal hydrolase 33	0.00369406	10.6165	0.962357	0.981714	0.0485263	-6.63361
Kid. Cortex	Mouse	Ppp1r12c	Ppp1r12c	F6XWD4	Protein phosphatase 1, regulatory subunit 12C (Fragment)	0.147982	12.2822	0.040158	0.176112	2.39602	-4.22153
Kid. Cortex	Mouse	Gm21970	Gm21970;Il10rb;Il10rb	F6XX07;Q61190;Q8VHM7	Predicted gene 21970 (Fragment);Interleukin-10 receptor subunit beta;Interleukin 10 receptor 2	-0.0941598	10.811	0.70258	0.848882	-0.395826	-6.49753
Kid. Cortex	Mouse	Phospho1	Phospho1	F6Y6Q2;Q8R2H9	Phosphatase, orphan 1 (Fragment);Phosphoethanolamine/phosphocholine phosphatase	-0.0873929	9.8936	0.5932	0.781558	-0.553808	-6.47023
Kid. Cortex	Mouse	Kdm2a	Kdm2a	F6YRW4;P59997	Lysine (K)-specific demethylase 2A;Lysine-specific demethylase 2A	0.108718	11.2024	0.185065	0.414245	1.43516	-5.6238
Kid. Cortex	Mouse	Rps18-ps6	Rps18-ps6;Rps18	F6YVP7;P62270	40S ribosomal protein S18	-0.0708407	16.2567	0.550642	0.755349	-0.619981	-6.4294
Kid. Cortex	Mouse	Tmem256	Tmem256	F6YWB5	Transmembrane protein 256 (Fragment)	-0.00129941	12.7773	0.996409	0.998404	-0.00462777	-6.63488
Kid. Cortex	Mouse	Cc2d2a	Cc2d2a	F6YZ61;Q8CFW7	Coiled-coil and C2 domain containing 2A (Fragment);Coiled-coil and C2 domain-containing protein 2A	0.128904	10.0138	0.136376	0.351159	1.63548	-5.35893
Kid. Cortex	Mouse	Ppfibp1	Ppfibp1	F6YZ95	PTPRF interacting protein, binding protein 1 (liprin beta 1) (Fragment)	0.233265	10.789	0.176483	0.402695	1.46679	-5.58333
Kid. Cortex	Mouse	Zbtb38	Zbtb38	F6Z595;Q3LR78	Zinc finger and BTB domain containing 38;CtBP-interacting BTB zinc finger protein	-0.0583314	11.0986	0.609157	0.79207	-0.529669	-6.48405
Kid. Cortex	Mouse	Senp6	Senp6	F6Z9A1;Q6P7W0	SUMO/sentrin specific peptidase 6;Sentrin-specific protease 6	0.0802999	9.66673	0.665869	0.827125	0.448243	-6.47365
Kid. Cortex	Mouse	Ncbp2as2	Ncbp2as2	A0A0J9YTR2	RIKEN cDNA 0610012G03 gene	-0.0578453	12.9018	0.716824	0.855396	-0.374332	-6.55897
Kid. Cortex	Mouse	Ces2h	Ces2h	F6Z9B9	Carboxylic ester hydrolase	0.223008	8.93792	0.557683	0.760086	0.608839	-6.43657
Kid. Cortex	Mouse	Wiz	Wiz	F6ZBR8	Widely-interspaced zinc finger motifs	0.319189	10.4757	0.00106853	0.0250878	4.73348	-0.592199
Kid. Cortex	Mouse	Tpr	Tpr	F6ZDS4	Nucleoprotein TPR	0.0652274	13.2727	0.336478	0.572705	1.0153	-6.10238
Kid. Cortex	Mouse	Efemp1	Efemp1	F6ZFS0;Q8BPB5	Epidermal growth factor-containing fibulin-like extracellular matrix protein 1 (Fragment);EGF-containing fibulin-like extracellular matrix protein 1	0.796299	12.3301	0.0171169	0.111435	2.91691	-3.38692
Kid. Cortex	Mouse	Ndufab1	Ndufab1	F6ZFT1;F8WJ64;Q9CR21	Acyl carrier protein (Fragment);Acyl carrier protein (Fragment);Acyl carrier protein, mitochondrial	-0.536848	13.1356	0.00686981	0.067155	-3.48628	-2.47473
Kid. Cortex	Mouse	Mocs2	Mocs2	F6ZGI7	Molybdopterin synthase sulfur carrier subunit	-0.149044	12.5759	0.279041	0.517018	-1.1519	-5.95973
Kid. Cortex	Mouse	Gbe1	Gbe1	F6ZHD8;Q9D6Y9	1,4-alpha-glucan branching enzyme;1,4-alpha-glucan-branching enzyme	-0.105718	14.1495	0.144079	0.362422	-1.59992	-5.40737
Kid. Cortex	Mouse	Numa1	Numa1	F6ZQA3	Nuclear mitotic apparatus protein 1 (Fragment)	0.040135	10.3841	0.784096	0.894676	0.282303	-6.59156
Kid. Cortex	Mouse	Wsb1	Wsb1	F6ZUJ8;O54927	WD repeat and SOCS box-containing 1 (Fragment);WD repeat and SOCS box-containing protein 1		8.81764
Kid. Cortex	Mouse	Hnrnpd	Hnrnpd	F6ZV59;G3X9W0;G5E8G0;Q60668	Heterogeneous nuclear ribonucleoprotein D (Fragment);Heterogeneous nuclear ribonucleoprotein D;Heterogeneous nuclear ribonucleoprotein D;Heterogeneous nuclear ribonucleoprotein D0	0.115165	14.2563	0.241843	0.479509	1.25282	-5.84586
Kid. Cortex	Mouse	Khk	Khk	A0A0J9YTU1	Ketohexokinase (Fragment)	-1.49838	11.0764	0.00697838	0.0679376	-5.10046	-1.75495
Kid. Cortex	Mouse	Eng	Eng	F7A1B4;Q3UAM9;Q63961	Endoglin	0.44429	12.2055	0.000173455	0.0117248	6.12694	1.23976
Kid. Cortex	Mouse	Pakap	Pakap	F7AA26	Paralemmin A kinase anchor protein (Fragment)	0.124166	13.4569	0.166635	0.39027	1.50479	-5.53402
Kid. Cortex	Mouse	Plcd3	Plcd3	F7AAE0;Q8K2J0	Phosphoinositide phospholipase C (Fragment);1-phosphatidylinositol 4,5-bisphosphate phosphodiesterase delta-3	-0.624433	10.9645	0.0766577	0.253162	-1.99914	-4.83501
Kid. Cortex	Mouse	Piezo1	Piezo1	F7AC58	Piezo-type mechanosensitive ion channel component	0.249553	10.5237	0.0397198	0.174821	2.40271	-4.21095
Kid. Cortex	Mouse	Macf1	Macf1	F7ACR9	Microtubule-actin crosslinking factor 1 (Fragment)	0.0150668	14.8451	0.781442	0.893272	0.285878	-6.59047
Kid. Cortex	Mouse	Psmd4	Psmd4	F7AI87	Proteasome (prosome, macropain) 26S subunit, non-ATPase, 4 (Fragment)	-0.0105813	11.8488	0.909027	0.956866	-0.117522	-6.62736
Kid. Cortex	Mouse	Il17rc	Il17rc	F7AR97;Q8K4C2	Interleukin 17 receptor C (Fragment);Interleukin-17 receptor C	0.133373	8.48666	0.251253	0.489812	1.23675	-5.81197
Kid. Cortex	Mouse	Stard7	Stard7	F7BBA2;Q8R1R3	START domain containing 7 (Fragment);StAR-related lipid transfer protein 7, mitochondrial	-0.151312	10.5365	0.114234	0.318346	-1.74893	-5.20072
Kid. Cortex	Mouse	Ankrd50	Ankrd50	F7BE84	Ankyrin repeat domain 50 (Fragment)	0.294389	11.8226	0.102338	0.29896	1.81855	-5.10111
Kid. Cortex	Mouse	Sorbs2	Sorbs2	F7BEU1	Sorbin and SH3 domain containing 2 (Fragment)	0.181868	9.25043	0.533215	0.743862	0.655291	-6.27485
Kid. Cortex	Mouse	Specc1	Specc1	A0A0J9YTU3	Sperm antigen with calponin homology and coiled-coil domains 1	0.12097	11.7303	0.289353	0.526703	1.12585	-5.98798
Kid. Cortex	Mouse	Gm21992	Gm21992	F7BGR7	Predicted gene 21992	0.134003	12.4893	0.147434	0.36651	1.58496	-5.42757
Kid. Cortex	Mouse	Morc3	Morc3	F7BJB9	MORC family CW-type zinc finger protein 3	0.316319	10.7849	0.0175559	0.112525	2.90135	-3.412
Kid. Cortex	Mouse	Pcdh1	Pcdh1	F7BJK1	Protocadherin 1 (Fragment)	0.0924326	13.483	0.598731	0.785912	0.545402	-6.47511
Kid. Cortex	Mouse	Slc22a23	Slc22a23	F7BP73;Q3UHH2	Solute carrier family 22, member 23 (Fragment);Solute carrier family 22 member 23	-0.245308	11.284	0.288885	0.526355	-1.12701	-5.98673
Kid. Cortex	Mouse	Arhgef10	Arhgef10	F7BQE4;Q8C033	Rho guanine nucleotide exchange factor (GEF) 10 (Fragment);Rho guanine nucleotide exchange factor 10	0.293793	9.89563	0.146362	0.364631	1.58971	-5.42118
Kid. Cortex	Mouse	Nhej1	Nhej1	F7BTP0;Q3KNJ2	Non-homologous end-joining factor 1 (Fragment);Non-homologous end-joining factor 1	-0.0642834	9.57839	0.441021	0.667944	-0.805994	-6.29252
Kid. Cortex	Mouse	Nkiras1	Nkiras1	F7BUB1;Q8CEC5	NFKB inhibitor interacting Ras-like protein 1 (Fragment);NF-kappa-B inhibitor-interacting Ras-like protein 1	-0.686821	9.29716	0.0140342	0.0996718	-3.25113	-2.95614
Kid. Cortex	Mouse	Tspan15	Tspan15	F7BWT7	Tetraspanin-15	-0.104517	11.1168	0.293235	0.530125	-1.11623	-5.99829
Kid. Cortex	Mouse	Scarb1	Scarb1	F7C5U2;Q61009	Scavenger receptor class B, member 1 (Fragment);Scavenger receptor class B member 1	0.564613	9.46228	0.00482904	0.0557886	3.85698	-2.00942
Kid. Cortex	Mouse	Zfand1	Zfand1	F7CFT1;Q8BFR6	Zinc finger, AN1-type domain 1 (Fragment);AN1-type zinc finger protein 1	-0.171395	10.9321	0.488806	0.710106	-0.721694	-6.35849
Kid. Cortex	Mouse	Eif4g1	Eif4g1	A0A0J9YTV0;A0A0J9YU44	Eukaryotic translation initiation factor 4, gamma 1 (Fragment);Eukaryotic translation initiation factor 4, gamma 1 (Fragment)	0.0876373	10.7466	0.700188	0.847643	0.401269	-6.41868
Kid. Cortex	Mouse	Col4a5	Col4a5	F7CK55;Q63ZW6	Collagen, type IV, alpha 5 (Fragment);Col4a5 protein	0.0433702	13.5964	0.913974	0.958663	0.111101	-6.62816
Kid. Cortex	Mouse	Sgip1	Sgip1	F7CPX0;Q8VD37	SH3-containing GRB2-like protein 3-interacting protein 1 (Fragment);SH3-containing GRB2-like protein 3-interacting protein 1	0.0198507	9.78214	0.784886	0.894926	0.281239	-6.59189
Kid. Cortex	Mouse	Gypc	Gypc	F7D1I5;G3UXY6;Q78HU7	Glycophorin C;Glycophorin C;Glycophorin-C	-0.0806123	11.1473	0.896916	0.950184	-0.133264	-6.62521
Kid. Cortex	Mouse	Snx7	Snx7	F7D3B8	Sorting nexin 7 (Fragment)	0.0550991	12.6257	0.521682	0.73479	0.666707	-6.39803
Kid. Cortex	Mouse	Gm45837	Gm45837	F7D3W5	Phosphodiesterase	0.240314	11.5534	0.00776777	0.0711938	3.40848	-2.59822
Kid. Cortex	Mouse	Phactr2	Phactr2	F7D4H5	Phosphatase and actin regulator	-0.00128011	11.8794	0.995591	0.998226	-0.0056811	-6.63488
Kid. Cortex	Mouse	Gm17079	Gm17079;Gm17078;Gm17174	F7D8Y4;M0QW51;M0QWQ9	Predicted gene 17079;Predicted gene 17078;Predicted gene 17174	-0.597284	8.96827	0.134806	0.349235	-1.66338	-5.24588
Kid. Cortex	Mouse	Pdia6	Pdia6	F7DBQ0;Q3TML0	Protein disulfide-isomerase A6	0.124544	14.8799	0.0976236	0.29113	1.84823	-5.0581
Kid. Cortex	Mouse	Helq	Helq	F7DCU7;Q2VPA6	Helicase, POLQ-like (Fragment);Helicase POLQ-like	0.177109	8.05788	0.510774	0.726829	0.721037	-5.95233
Kid. Cortex	Mouse	Eef1akmt4	Eef1akmt4;Eef1akmt4-Ece2;Eef1akmt4	F7DDS0;P0DPD9;P0DPE0	EEF1A lysine methyltransferase 4;EEF1AKMT4-ECE2 readthrough transcript protein;EEF1A lysine methyltransferase 4	-0.540603	7.92663	0.129649	0.340232	-1.66806	-5.31406
Kid. Cortex	Mouse	Rbpj	Rbpj	A0A0J9YTV5;E9Q7W0;P31266;Q3U6F1	Recombination signal binding protein for immunoglobulin kappa J region;Recombination signal binding protein for immunoglobulin kappa J region;Recombining binding protein suppressor of hairless;Recombination signal binding protein for immunoglobulin kappa J region	0.831335	9.09112	0.161369	0.383352	1.54314	-5.43567
Kid. Cortex	Mouse	Arrb1	Arrb1	F7DF62	Arrestin, beta 1 (Fragment)	0.0679422	10.978	0.71708	0.855487	0.373977	-6.55911
Kid. Cortex	Mouse	Skic3	Skic3	F8VPK0	Tetratricopeptide repeat domain 37	0.0159655	12.3361	0.813541	0.909727	0.242882	-6.60278
Kid. Cortex	Mouse	Xylt1	Xylt1	F8VPK6;Q811B1	protein xylosyltransferase;Xylosyltransferase 1	-0.757432	8.87597	0.340961	0.576392	-1.07986	-5.50368
Kid. Cortex	Mouse	Pik3c2a	Pik3c2a	F8VPL2;Q61194	Phosphatidylinositol-4-phosphate 3-kinase catalytic subunit type 2 alpha;Phosphatidylinositol 4-phosphate 3-kinase C2 domain-containing subunit alpha	0.0658918	12.5366	0.421241	0.651279	0.84267	-6.26186
Kid. Cortex	Mouse	Erc1	Erc1	F8VPM7;V9GXF0;V9GXP8	ELKS/RAB6-interacting/CAST family member 1	0.059669	12.6117	0.336792	0.572799	1.0146	-6.10307
Kid. Cortex	Mouse	Agl	Agl	F8VPN4	Glycogen debranching enzyme	-0.126089	13.3804	0.14247	0.360102	-1.6072	-5.3975
Kid. Cortex	Mouse	Zc3h7b	Zc3h7b	F8VPP8	Zinc finger CCCH type containing 7B	0.0830403	11.6478	0.338817	0.574611	1.01013	-6.1075
Kid. Cortex	Mouse	Arid4a	Arid4a	F8VPQ2	AT-rich interactive domain-containing protein 4A	0.138653	9.90255	0.181141	0.409597	1.44946	-5.60557
Kid. Cortex	Mouse	Lmod1	Lmod1	F8VPR1;Q8BVA4	Leiomodin 1 (smooth muscle);Leiomodin-1	0.295128	11.6217	0.0705912	0.242835	2.05018	-4.75804
Kid. Cortex	Mouse	Evi5	Evi5	F8VPT6;P97366	Ecotropic viral integration site 5;Ecotropic viral integration site 5 protein	0.159206	10.2785	0.552944	0.756548	0.619295	-6.37648
Kid. Cortex	Mouse	Septin11	Septin11	A0A0J9YTY0;A0A0J9YUL3;Q8C1B7	Septin;Septin;Septin-11	0.212028	14.0688	0.0417088	0.1793	2.3729	-4.25804
Kid. Cortex	Mouse	Sik2	Sik2	F8VPT7;H3BJC9;H3BKG1;Q8CFH6	non-specific serine/threonine protein kinase;non-specific serine/threonine protein kinase;non-specific serine/threonine protein kinase;Serine/threonine-protein kinase SIK2	0.478709	8.40023	0.477423	0.700372	0.757519	-6.07473
Kid. Cortex	Mouse	Farp1	Farp1	F8VPU2	FERM, ARHGEF and pleckstrin domain-containing protein 1	0.171925	13.4885	0.120567	0.32776	1.71456	-5.24921
Kid. Cortex	Mouse	Usp7	Usp7	F8VPX1	Ubiquitin carboxyl-terminal hydrolase 7	0.0547506	12.7699	0.378071	0.609505	0.927088	-6.18692
Kid. Cortex	Mouse	Fbxw9	Fbxw9	F8VPX2	F-box and WD-40 domain protein 9	0.393083	9.34266	0.141485	0.359024	1.6117	-5.39139
Kid. Cortex	Mouse	Taf5	Taf5	F8VPY2;Q8C092	TATA-box binding protein associated factor 5;Transcription initiation factor TFIID subunit 5	0.282303	10.3958	0.0853861	0.26913	1.93208	-4.93502
Kid. Cortex	Mouse	Usp32	Usp32	F8VPZ3	ubiquitinyl hydrolase 1	0.0390727	10.2505	0.565181	0.764938	0.597062	-6.44402
Kid. Cortex	Mouse	Bicra	Bicra	F8VPZ9	BRD4-interacting chromatin-remodeling complex-associated protein	4.47772	2.4988	0.236717	0.473271	1.39057	-5.30411
Kid. Cortex	Mouse	Fryl	Fryl	F8VQ05	FRY like transcription coactivator	0.156363	11.7417	0.0485728	0.195584	2.27985	-4.4042
Kid. Cortex	Mouse	Tmc4	Tmc4	F8VQ45;Q7TQ65	Transmembrane channel-like protein;Transmembrane channel-like protein 4	-0.508979	7.83337	0.362124	0.59548	-1.00248	-5.80307
Kid. Cortex	Mouse	Dicer1	Dicer1	F8VQ54;Q8R418	Endoribonuclease Dicer	0.272217	10.4971	0.00551648	0.0602954	3.62635	-2.25376
Kid. Cortex	Mouse	Wdr1	Wdr1	A0A0J9YU05	WD repeat domain 1	-0.502513	9.82513	0.0492262	0.196801	-2.58338	-3.91135
Kid. Cortex	Mouse	Map3k1	Map3k1	F8VQ72	Mitogen-activated protein kinase kinase kinase 1	0.471191	9.09094	0.0176461	0.112876	2.8982	-3.41708
Kid. Cortex	Mouse	Kif13a	Kif13a	F8VQ75;Q9EQW7	Kinesin family member 13A;Kinesin-like protein KIF13A	0.124727	11.9803	0.0426335	0.18193	2.35952	-4.27914
Kid. Cortex	Mouse	Phip	Phip	F8VQ93	Pleckstrin homology domain interacting protein	0.314875	9.7736	0.0113048	0.0878839	3.17332	-2.97415
Kid. Cortex	Mouse	Tacc1	Tacc1	F8VQ95;Q6Y685	Transforming, acidic coiled-coil containing protein 1;Transforming acidic coiled-coil-containing protein 1	0.214544	12.1714	0.161507	0.383488	1.52537	-5.507
Kid. Cortex	Mouse	Pam	Pam	F8VQA4;P97467	Peptidylglycine alpha-amidating monooxygenase;Peptidyl-glycine alpha-amidating monooxygenase	-0.0244078	11.0639	0.811254	0.908799	-0.245928	-6.60198
Kid. Cortex	Mouse	Myo10	Myo10	F8VQB6	Unconventional myosin-X	0.20789	12.0194	0.0443448	0.186108	2.3355	-4.31696
Kid. Cortex	Mouse	Srp72	Srp72	F8VQC1	Signal recognition particle subunit SRP72	-0.0173706	13.5033	0.843337	0.925167	-0.203412	-6.61235
Kid. Cortex	Mouse	Agap3	Agap3	F8VQE9;Q8VHH5	ArfGAP with GTPase domain, ankyrin repeat and PH domain 3;Arf-GAP with GTPase, ANK repeat and PH domain-containing protein 3	-0.067802	11.0978	0.373911	0.606594	-0.93558	-6.17905
Kid. Cortex	Mouse	H2-T24	H2-T24	F8VQG4	Histocompatibility 2, T region locus 24	0.0989592	9.34141	0.451443	0.677805	0.787114	-6.30785
[truncated: 7,679 more rows]

## Sheet: Kid. Medulla
Group	Organism	Gene	Genes	Uniprot_IDs	Protein_Description	log2FC	Average_Expression	P_Value	Adjusted_P_Value	t	B
Kid. Medulla	Mouse	Magohb	Magohb	A0A023T778	Mago homolog B, exon junction complex core component	0.176665	9.67302	0.292974	0.551613	1.11688	-5.89855
Kid. Medulla	Mouse	Igkv5-39	Igkv5-39	A0A075B5M7;A0A0G2JDV4	Immunoglobulin kappa variable 5-39;Immunoglobulin kappa variable 5-39 (Fragment)	0.562584	10.7849	0.203356	0.457306	1.37177	-5.60552
Kid. Medulla	Mouse	Topbp1	Topbp1	A0A087WS55;Q6ZQF0	Topoisomerase (DNA) II binding protein 1 (Fragment);DNA topoisomerase 2-binding protein 1	0.382144	7.54381	0.236527	0.492765	1.29458	-5.57343
Kid. Medulla	Mouse	Dgkh	Dgkh	A0A2I3BQ48	Diacylglycerol kinase	0.149703	9.21976	0.230509	0.485657	1.27684	-5.75746
Kid. Medulla	Mouse	Nphs1	Nphs1	Q9QZS7	Nephrin	-0.549558	10.4428	0.0153299	0.128997	-2.91885	-3.27087
Kid. Medulla	Mouse	Sh2d3c	Sh2d3c	Q9QZS8	SH2 domain-containing protein 3C	0.028229	8.95302	0.751608	0.871984	0.325368	-6.51412
Kid. Medulla	Mouse	Gp5	Gp5	Q9QZU3	Glycoprotein 5 (platelet) (Fragment)	-1.06216	7.16805	0.175797	0.422688	-1.5762	-5.07942
Kid. Medulla	Mouse	Ube2l6	Ube2l6	Q9QZU9	Ubiquitin/ISG15-conjugating enzyme E2 L6	0.543116	8.79106	0.0175383	0.13664	2.84031	-3.40216
Kid. Medulla	Mouse	Srr	Srr	Q9QZX7	Serine racemase	-0.0864128	11.7848	0.357438	0.609943	-0.964712	-6.09132
Kid. Medulla	Mouse	Dpt	Dpt	Q9QZZ6	Dermatopontin	-0.130985	12.7731	0.595495	0.777449	-0.548327	-6.41117
Kid. Medulla	Mouse	Mvk	Mvk	Q9R008	Mevalonate kinase	0.0532919	11.2805	0.778935	0.885504	0.288393	-6.52624
Kid. Medulla	Mouse	Ctsf	Ctsf	Q9R013	Cathepsin F	0.182173	11.9814	0.0768606	0.278579	1.97221	-4.80483
Kid. Medulla	Mouse	Dnajc12	Dnajc12	Q9R022	DnaJ homolog subfamily C member 12	-0.446774	11.5794	0.0829385	0.289748	-1.9263	-4.87427
Kid. Medulla	Mouse	Angptl2	Angptl2	Q9R045	Angiopoietin-related protein 2	0.234702	10.3549	0.156501	0.399413	1.53209	-5.43599
Kid. Medulla	Mouse	Tmem260	Tmem260	A0A2I3BQ91;Q8BMD6	Transmembrane protein 260	0.0877661	10.3762	0.381351	0.628837	0.915747	-6.13687
Kid. Medulla	Mouse	Amfr	Amfr	Q9R049	E3 ubiquitin-protein ligase AMFR	-0.070779	11.7066	0.305252	0.566807	-1.08059	-5.97584
Kid. Medulla	Mouse	Fhl3	Fhl3	Q9R059	Four and a half LIM domains protein 3	0.245525	12.6952	0.0193232	0.1428	2.78381	-3.49646
Kid. Medulla	Mouse	Nubp1	Nubp1	Q9R060	Cytosolic Fe-S cluster assembly factor NUBP1	0.622987	8.76028	0.0131539	0.121743	3.00836	-3.12105
Kid. Medulla	Mouse	Bcam	Bcam	Q9R069	Basal cell adhesion molecule	-0.0866542	14.5631	0.513118	0.724344	-0.678057	-6.32855
Kid. Medulla	Mouse	Prkab1	Prkab1	Q9R078	5'-AMP-activated protein kinase subunit beta-1	0.130431	12.4158	0.126335	0.357816	1.66771	-5.25057
Kid. Medulla	Mouse	Spint1	Spint1	Q9R097	Kunitz-type protease inhibitor 1	0.000308614	11.4518	0.99742	0.998686	0.00331573	-6.57091
Kid. Medulla	Mouse	Hgfac	Hgfac	Q9R098	Hepatocyte growth factor activator	1.0631	9.13287	0.00362682	0.0665211	4.06123	-1.65454
Kid. Medulla	Mouse	Tbl2	Tbl2	Q9R099	Transducin beta-like protein 2	0.00568532	11.7408	0.9445	0.971221	0.071383	-6.56817
Kid. Medulla	Mouse	Pex14	Pex14	Q9R0A0	Peroxisomal membrane protein PEX14	-0.00438834	12.2385	0.981402	0.991462	-0.0239008	-6.57061
Kid. Medulla	Mouse	Lamc3	Lamc3	Q9R0B6	Laminin subunit gamma-3	-0.161181	11.0717	0.376762	0.624538	-0.924969	-6.12845
Kid. Medulla	Mouse	Stk3	Stk3	A0A2I3BQE0;Q9JI10	non-specific serine/threonine protein kinase;Serine/threonine-protein kinase 3	0.148672	11.7381	0.13616	0.37201	1.62064	-5.31595
Kid. Medulla	Mouse	Bloc1s6	Bloc1s6	Q9R0C0	Biogenesis of lysosome-related organelles complex 1 subunit 6	-0.131586	10.1087	0.206483	0.461346	-1.35095	-5.66818
Kid. Medulla	Mouse	Vav3	Vav3	Q9R0C8	Guanine nucleotide exchange factor VAV3	0.551837	9.12903	0.000633125	0.0280932	4.88921	-0.102652
Kid. Medulla	Mouse	Wdr54	Wdr54	Q9R0D8	WD repeat-containing protein 54	0.367949	9.27788	0.0885578	0.299298	1.88658	-4.93378
Kid. Medulla	Mouse	Plod3	Plod3	Q9R0E1	Multifunctional procollagen lysine hydroxylase and glycosyltransferase LH3	0.353799	11.6623	0.00948699	0.104442	3.20026	-2.79975
Kid. Medulla	Mouse	Plod1	Plod1	Q9R0E2	Procollagen-lysine,2-oxoglutarate 5-dioxygenase 1	0.372006	10.9079	0.00422712	0.0705667	3.68271	-1.99857
Kid. Medulla	Mouse	Acox1	Acox1	Q9R0H0	Peroxisomal acyl-coenzyme A oxidase 1	-0.20471	15.2305	0.621678	0.794538	-0.509171	-6.43288
Kid. Medulla	Mouse	Krt71	Krt71	Q9R0H5	Keratin, type II cytoskeletal 71	-0.667398	11.7066	0.0129132	0.121098	-3.01917	-3.10294
Kid. Medulla	Mouse	Pcm1	Pcm1	Q9R0L6	Pericentriolar material 1 protein	0.0765567	11.4713	0.269612	0.527844	1.16874	-5.88113
Kid. Medulla	Mouse	Celsr2	Celsr2	Q9R0M0	Cadherin EGF LAG seven-pass G-type receptor 2	0.134752	10.4257	0.246164	0.501479	1.23191	-5.80984
Kid. Medulla	Mouse	Podxl	Podxl	Q9R0M4	Podocalyxin	-0.0650497	13.4857	0.600803	0.780587	-0.540319	-6.41573
Kid. Medulla	Mouse	Mettl6	Mettl6	A0A2I3BQH6;A0A2I3BRX7;Q8BVH9	Methyltransferase like 6 (Fragment);tRNA N(3)-methylcytidine methyltransferase;tRNA N(3)-methylcytidine methyltransferase METTL6	-0.698699	8.28608	0.35647	0.609223	-0.998758	-5.76615
Kid. Medulla	Mouse	Tpk1	Tpk1	Q9R0M5	Thiamin pyrophosphokinase 1	-0.108973	13.6147	0.317115	0.577034	-1.05301	-6.00428
Kid. Medulla	Mouse	Rab9a	Rab9a	Q9R0M6	Ras-related protein Rab-9A	-0.141938	11.886	0.0468461	0.222096	-2.26651	-4.34486
Kid. Medulla	Mouse	Galk1	Galk1	Q9R0N0	Galactokinase	0.0288386	13.7204	0.713985	0.849931	0.377091	-6.49476
Kid. Medulla	Mouse	Smap	Smap	Q9R0P4	Small acidic protein	0.693183	10.3821	0.000239866	0.0182593	5.56243	0.863891
Kid. Medulla	Mouse	Dstn	Dstn	Q9R0P5	Destrin	0.106915	15.197	0.184983	0.435078	1.42368	-5.57724
Kid. Medulla	Mouse	Uchl1	Uchl1	Q9R0P9	Ubiquitin carboxyl-terminal hydrolase isozyme L1	0.243386	12.0028	0.131778	0.366545	1.64125	-5.28746
Kid. Medulla	Mouse	Sytl4	Sytl4	Q9R0Q1	Synaptotagmin-like protein 4	-0.232657	9.90747	0.352337	0.606481	-0.975459	-6.08106
Kid. Medulla	Mouse	Arpc1a	Arpc1a	Q9R0Q6	Actin-related protein 2/3 complex subunit 1A	-0.357435	13.6651	0.00485533	0.0778643	-3.59903	-2.13639
Kid. Medulla	Mouse	Ptges3	Ptges3	Q9R0Q7	Prostaglandin E synthase 3	0.166133	13.0589	0.173475	0.419961	1.46562	-5.52338
Kid. Medulla	Mouse	Med20	Med20	Q9R0X0	Mediator of RNA polymerase II transcription subunit 20	-0.0692729	9.18142	0.713948	0.849931	-0.379842	-6.37172
Kid. Medulla	Mouse	Reep4	Reep4	A0A2I3BQJ3;Q8K072	Receptor expression-enhancing protein;Receptor expression-enhancing protein 4	0.3705	9.69442	0.0729426	0.272529	2.00364	-4.75687
Kid. Medulla	Mouse	Acot9	Acot9	Q9R0X4	Acyl-coenzyme A thioesterase 9, mitochondrial	-0.176236	14.2677	0.214693	0.470208	-1.32486	-5.70002
Kid. Medulla	Mouse	Ak1	Ak1	Q9R0Y5	Adenylate kinase isoenzyme 1	0.0490523	13.9858	0.47797	0.698329	0.737149	-6.28563
Kid. Medulla	Mouse	Gda	Gda	Q9R111	Guanine deaminase	0.687825	12.1058	0.0248651	0.161718	2.6369	-3.74063
Kid. Medulla	Mouse	Sqor	Sqor	Q9R112	Sulfide:quinone oxidoreductase, mitochondrial	-0.184776	14.9355	0.0539496	0.239076	-2.18322	-4.47732
Kid. Medulla	Mouse	Tyk2	Tyk2	Q9R117	Non-receptor tyrosine-protein kinase TYK2	0.0348332	10.856	0.641215	0.807526	0.480493	-6.44782
Kid. Medulla	Mouse	Htra1	Htra1	Q9R118	Serine protease HTRA1	0.364685	11.3166	0.00200071	0.0515257	4.14342	-1.25245
Kid. Medulla	Mouse	Slc26a4	Slc26a4	Q9R155	Pendrin	-0.254022	9.60637	0.266248	0.524714	-1.17753	-5.87138
Kid. Medulla	Mouse	Angptl3	Angptl3	Q9R182	Angiopoietin-related protein 3	0.858686	9.33599	0.0392754	0.204248	2.37001	-4.17823
Kid. Medulla	Mouse	Mta2	Mta2	Q9R190	Metastasis-associated protein MTA2	0.175693	12.4006	0.037798	0.200523	2.39246	-4.14182
Kid. Medulla	Mouse	Cry2	Cry2	Q9R194	Cryptochrome-2	-0.430029	9.00055	0.042744	0.212476	-2.32038	-4.2584
Kid. Medulla	Mouse	Cyrib	Cyrib	A0A2I3BQK1	CYFIP related Rac1 interactor B (Fragment)	-0.183224	8.99191	0.490523	0.708049	-0.715746	-6.30155
Kid. Medulla	Mouse	Taf7	Taf7	Q9R1C0	Transcription initiation factor TFIID subunit 7	0.142908	9.1466	0.559403	0.757247	0.603832	-6.3778
Kid. Medulla	Mouse	Dgke	Dgke	Q9R1C6	Diacylglycerol kinase epsilon	-0.227625	9.24215	0.133212	0.368582	-1.63444	-5.2969
Kid. Medulla	Mouse	Foxo1	Foxo1	Q9R1E0	Forkhead box protein O1	0.237609	10.4114	0.16814	0.415007	1.48588	-5.497
Kid. Medulla	Mouse	Enpp2	Enpp2	Q9R1E6	Ectonucleotide pyrophosphatase/phosphodiesterase family member 2	0.302868	10.6594	0.0168924	0.134327	2.8622	-3.3656
Kid. Medulla	Mouse	Nsdhl	Nsdhl	Q9R1J0	Sterol-4-alpha-carboxylate 3-dehydrogenase, decarboxylating	-0.0495187	12.729	0.747333	0.870081	-0.331195	-6.51208
Kid. Medulla	Mouse	Cetn2	Cetn2	Q9R1K9;Z4YJH1	Centrin-2;Centrin 2	0.123339	11.9192	0.347593	0.603051	0.985561	-6.07133
Kid. Medulla	Mouse	Psma4	Psma4	Q9R1P0	Proteasome subunit alpha type-4	0.106678	15.0492	0.152919	0.395413	1.54692	-5.41617
Kid. Medulla	Mouse	Psmb3	Psmb3	Q9R1P1	Proteasome subunit beta type-3	0.0871381	13.3972	0.393192	0.638399	0.892309	-6.15797
Kid. Medulla	Mouse	Psmb2	Psmb2	Q9R1P3	Proteasome subunit beta type-2	0.108226	14.2462	0.101902	0.318992	1.8009	-5.06014
Kid. Medulla	Mouse	Psma1	Psma1	Q9R1P4	Proteasome subunit alpha type-1	0.130063	15.0664	0.16702	0.414493	1.4902	-5.49134
Kid. Medulla	Mouse	Camk2g	Camk2g	A0A2I3BQP6;Q923T9	calcium/calmodulin-dependent protein kinase;Calcium/calmodulin-dependent protein kinase type II subunit gamma	0.132232	11.2107	0.149695	0.390824	1.56053	-5.39788
Kid. Medulla	Mouse	Tmem176b	Tmem176b	Q9R1Q6	Transmembrane protein 176B	0.575616	12.6141	0.000109318	0.0114337	6.14289	1.64102
Kid. Medulla	Mouse	Plp2	Plp2	Q9R1Q7	Proteolipid protein 2	-0.813912	11.8819	0.146819	0.386863	-1.57289	-5.38119
Kid. Medulla	Mouse	Atp6ap1	Atp6ap1	Q9R1Q9	V-type proton ATPase subunit S1	0.0611502	11.3743	0.513859	0.724869	0.676838	-6.3294
Kid. Medulla	Mouse	Abcc6	Abcc6	Q9R1S7	ATP-binding cassette sub-family C member 6	-0.504634	9.45284	0.00679458	0.0896324	-3.3979	-2.46986
Kid. Medulla	Mouse	Capn7	Capn7	Q9R1S8	Calpain-7	-0.0793219	10.8968	0.422343	0.659675	-0.836628	-6.20622
Kid. Medulla	Mouse	Sae1	Sae1	Q9R1T2	SUMO-activating enzyme subunit 1	0.223425	12.7322	0.00877276	0.100358	3.24644	-2.72254
Kid. Medulla	Mouse	Septin6	Septin6	Q9R1T4	Septin-6	0.205927	11.0973	0.149675	0.390824	1.56061	-5.39777
Kid. Medulla	Mouse	Calcrl	Calcrl	Q9R1W5	Calcitonin gene-related peptide type 1 receptor	0.146967	10.8871	0.374777	0.622907	0.928983	-6.12475
Kid. Medulla	Mouse	Abcc5	Abcc5	Q9R1X5	ATP-binding cassette sub-family C member 5	0.248156	8.32372	0.401686	0.644837	0.880113	-6.12931
Kid. Medulla	Mouse	Hic1	Hic1	Q9R1Y5;Z4YJP0	Hypermethylated in cancer 1 protein;Hypermethylated in cancer 1	0.41661	8.42733	0.142272	0.380591	1.6081	-5.30003
Kid. Medulla	Mouse	Ubr5	Ubr5	A0A2I3BQS6	Ubiquitin protein ligase E3 component n-recognin 5	0.140915	10.6452	0.0739563	0.27416	1.99536	-4.76954
Kid. Medulla	Mouse	Pts	Pts	Q9R1Z7	6-pyruvoyl tetrahydrobiopterin synthase	0.207365	13.1914	0.222351	0.478198	1.30126	-5.72844
Kid. Medulla	Mouse	Nbn	Nbn	Q9R207	Nibrin	0.206176	10.0663	0.0863058	0.295351	1.90221	-4.91043
Kid. Medulla	Mouse	Khdrbs3	Khdrbs3	Q9R226	KH domain-containing, RNA-binding, signal transduction-associated protein 3	-0.125892	13.5474	0.319278	0.577736	-1.04806	-6.00931
Kid. Medulla	Mouse	Hebp1	Hebp1	Q9R257	Heme-binding protein 1	-0.105439	13.2595	0.432174	0.666366	-0.818444	-6.22139
Kid. Medulla	Mouse	Myo1c	Myo1c	Q9WTI7	Unconventional myosin-Ic	-0.217995	14.736	0.0212587	0.149555	-2.72819	-3.58909
Kid. Medulla	Mouse	Fiz1	Fiz1	Q9WTJ4	Flt3-interacting zinc finger protein 1	2.53114	7.28012	0.173859	0.420327	1.49271	-5.37507
Kid. Medulla	Mouse	Cdyl	Cdyl	Q9WTK2	Chromodomain Y-like protein	0.150166	8.99298	0.379384	0.627466	0.919691	-6.13328
Kid. Medulla	Mouse	Gpaa1	Gpaa1	Q9WTK3	Glycosylphosphatidylinositol anchor attachment 1 protein	0.0873072	11.3188	0.427676	0.662288	0.826727	-6.21452
Kid. Medulla	Mouse	Stk11	Stk11	Q9WTK7	Serine/threonine-protein kinase STK11	0.0540304	9.55972	0.641969	0.808126	0.479395	-6.44838
Kid. Medulla	Mouse	Rab25	Rab25	Q9WTL2	Ras-related protein Rab-25	-0.271759	12.4505	0.134501	0.369653	-1.62838	-5.30528
Kid. Medulla	Mouse	Sall2	Sall2	A0A2I3BQV4;Q9QX96	Spalt like transcription factor 2;Sal-like protein 2	0.0502352	8.44259	0.840257	0.918093	0.207476	-6.50984
Kid. Medulla	Mouse	Lypla2	Lypla2	Q9WTL7	Acyl-protein thioesterase 2	0.212866	13.0422	0.0203907	0.147186	2.75247	-3.54867
Kid. Medulla	Mouse	Ruvbl2	Ruvbl2	Q9WTM5	RuvB-like 2	0.141265	12.7912	0.053423	0.237977	2.18902	-4.46815
Kid. Medulla	Mouse	Ggps1	Ggps1	Q9WTN0	Geranylgeranyl pyrophosphate synthase	0.0663234	11.6458	0.447952	0.678917	0.789825	-6.24468
Kid. Medulla	Mouse	Spry4	Spry4	Q9WTP2	Protein sprouty homolog 4	0.629946	8.86708	0.124129	0.354894	1.67873	-5.23511
Kid. Medulla	Mouse	Ak2	Ak2	Q9WTP6	Adenylate kinase 2, mitochondrial	-0.22171	15.7148	0.105515	0.325815	-1.77948	-5.09128
Kid. Medulla	Mouse	Ak3	Ak3	Q9WTP7	GTP:AMP phosphotransferase AK3, mitochondrial	-0.232665	15.3458	0.0246888	0.160877	-2.64104	-3.73376
Kid. Medulla	Mouse	Trpv2	Trpv2	Q9WTR1	Transient receptor potential cation channel subfamily V member 2	-0.235381	10.5953	0.480331	0.700348	-0.733097	-6.28868
Kid. Medulla	Mouse	Cdh13	Cdh13	Q9WTR5	Cadherin-13	-0.125309	11.5148	0.502018	0.716968	-0.696443	-6.31554
Kid. Medulla	Mouse	Fut8	Fut8	Q9WTS2	Alpha-(1,6)-fucosyltransferase	-0.0282122	12.5697	0.768103	0.879572	-0.302995	-6.52162
Kid. Medulla	Mouse	Phf2	Phf2	Q9WTU0	Lysine-specific demethylase PHF2	0.0935235	10.9831	0.342584	0.598413	0.996334	-6.06086
Kid. Medulla	Mouse	Xpo7	Xpo7	A0A2I3BQV5;E9PUW7;Q9EPK7	Exportin 7;Exportin 7;Exportin-7	-0.0420156	12.4805	0.527829	0.735588	-0.654056	-6.34505
Kid. Medulla	Mouse	Mapk9	Mapk9	Q9WTU6	Mitogen-activated protein kinase 9	0.0625388	12.2882	0.56914	0.763175	0.588669	-6.38722
Kid. Medulla	Mouse	Usp18	Usp18	Q9WTV6	Ubl carboxyl-terminal hydrolase 18	0.254405	7.4562	0.587481	0.772969	0.565125	-6.30965
Kid. Medulla	Mouse	Rlim	Rlim	Q9WTV7	E3 ubiquitin-protein ligase RLIM	0.315944	8.52982	0.0940195	0.306715	1.85016	-4.98784
Kid. Medulla	Mouse	Prkra	Prkra	Q9WTX2	Interferon-inducible double-stranded RNA-dependent protein kinase activator A	0.124623	12.0535	0.159422	0.403974	1.52022	-5.45177
Kid. Medulla	Mouse	Skp1	Skp1	Q9WTX5	S-phase kinase-associated protein 1	0.0146635	13.169	0.901525	0.950507	0.126912	-6.56224
Kid. Medulla	Mouse	Cul1	Cul1	Q9WTX6	Cullin-1	0.0427294	12.6009	0.499656	0.714791	0.700386	-6.31271
Kid. Medulla	Mouse	Mad1l1	Mad1l1	Q9WTX8	Mitotic spindle assembly checkpoint protein MAD1	0.0154456	11.292	0.872857	0.936444	0.164184	-6.5564
Kid. Medulla	Mouse	Uxt	Uxt	Q9WTZ0	Protein UXT	-0.10022	10.1253	0.71847	0.853438	-0.370869	-6.49724
Kid. Medulla	Mouse	Mbtps1	Mbtps1	Q9WTZ2	Membrane-bound transcription factor site-1 protease	-2.24715	7.90413	0.000217827	0.0174432	-7.90163	1.21593
Kid. Medulla	Mouse	Spint2	Spint2	Q9WU03	Kunitz-type protease inhibitor 2	0.086266	10.311	0.830218	0.911921	0.220104	-6.54485
Kid. Medulla	Mouse	Speg	Speg	A0A087WSE3;E9QQ25;Q62407	SPEG complex locus (Fragment);SPEG complex locus;Striated muscle-specific serine/threonine-protein kinase	0.456568	8.07648	0.0565473	0.243591	2.15538	-4.52123
Kid. Medulla	Mouse	Txndc16	Txndc16	A0A2I3BQZ0;Q7TN22	Thioredoxin domain containing 16 (Fragment);Thioredoxin domain-containing protein 16	0.597168	7.6008	0.161453	0.406707	1.51208	-5.46256
Kid. Medulla	Mouse	Ptpn4	Ptpn4	Q9WU22	Tyrosine-protein phosphatase non-receptor type 4	-0.281541	10.0841	0.247547	0.502745	-1.22805	-5.81427
Kid. Medulla	Mouse	Pfdn5	Pfdn5	Q9WU28	Prefoldin subunit 5	-0.0450331	11.8806	0.796151	0.893987	-0.265322	-6.53308
Kid. Medulla	Mouse	Scnn1g	Scnn1g	Q9WU39	Amiloride-sensitive sodium channel subunit gamma	0.389356	8.08664	0.201748	0.455287	1.3664	-5.64913
Kid. Medulla	Mouse	Atrn	Atrn	Q9WU60	Attractin	-0.065149	9.44102	0.661495	0.819063	-0.451167	-6.46224
Kid. Medulla	Mouse	Hebp2	Hebp2	Q9WU63	Heme-binding protein 2	0.363673	10.1761	0.0787696	0.281946	1.95743	-4.82726
Kid. Medulla	Mouse	Pdcd6ip	Pdcd6ip	Q9WU78	Programmed cell death 6-interacting protein	0.107268	13.8885	0.101813	0.318992	1.80143	-5.05936
Kid. Medulla	Mouse	Prodh	Prodh	Q9WU79	Proline dehydrogenase 1, mitochondrial	-0.348189	14.0246	0.00554665	0.0827557	-3.51907	-2.26862
Kid. Medulla	Mouse	Slc37a2	Slc37a2	Q9WU81	Glucose-6-phosphate exchanger SLC37A2	0.681308	9.59047	0.141214	0.379215	1.5976	-5.34757
Kid. Medulla	Mouse	Farsb	Farsb	Q9WUA2	Phenylalanine--tRNA ligase beta subunit	0.0104532	13.7407	0.913561	0.955608	0.111325	-6.56424
Kid. Medulla	Mouse	Epm2a	Epm2a	Q9WUA5	Laforin	-0.176824	8.56047	0.649809	0.812909	-0.4696	-6.41471
Kid. Medulla	Mouse	Fam107b	Fam107b	A0A2I3BR29;H9H9T1	Family with sequence similarity 107, member B;Family with sequence similarity 107, member B	-0.233532	9.11162	0.288865	0.546991	-1.12707	-5.83772
Kid. Medulla	Mouse	Akt3	Akt3	Q9WUA6	RAC-gamma serine/threonine-protein kinase	0.220235	8.92853	0.369456	0.618779	0.939818	-6.11473
Kid. Medulla	Mouse	Rbck1	Rbck1	Q9WUB0	RanBP-type and C3HC4-type zinc finger-containing protein 1	0.138525	10.5964	0.215116	0.470437	1.32354	-5.70162
Kid. Medulla	Mouse	Pygm	Pygm	Q9WUB3	Glycogen phosphorylase, muscle form	0.0772799	13.7119	0.380912	0.628342	0.916627	-6.13607
Kid. Medulla	Mouse	Clcnkb	Clcnkb	Q9WUB6	Chloride channel protein ClC-Kb	-0.254756	12.1509	0.0527264	0.236415	-2.19678	-4.45587
Kid. Medulla	Mouse	Clcnka	Clcnka	Q9WUB7	Chloride channel protein ClC-Ka	-0.61271	12.6831	0.142998	0.381601	-1.58964	-5.35843
Kid. Medulla	Mouse	Stub1	Stub1	Q9WUD1	E3 ubiquitin-protein ligase CHIP	-0.0772752	11.6764	0.378159	0.626092	-0.922153	-6.13103
Kid. Medulla	Mouse	Nprl2	Nprl2	Q9WUE4	GATOR complex protein NPRL2	0.321926	7.646	0.358057	0.610459	0.968587	-5.99785
Kid. Medulla	Mouse	Tmem115	Tmem115	Q9WUH1	Transmembrane protein 115	0.0917341	10.5967	0.312173	0.572616	1.0644	-5.9926
Kid. Medulla	Mouse	Mapk11	Mapk11	Q9WUI1	Mitogen-activated protein kinase 11	0.912536	8.47484	0.0341013	0.190334	2.45266	-4.04379
Kid. Medulla	Mouse	Eif4h	Eif4h	Q9WUK2	Eukaryotic translation initiation factor 4H	0.0476013	11.8426	0.713354	0.849567	0.377967	-6.49441
Kid. Medulla	Mouse	Robo2	Robo2	A0A2I3BR72;Q7TPD3	Roundabout guidance receptor 2;Roundabout homolog 2	0.256525	10.2238	0.0765394	0.278103	1.97473	-4.801
Kid. Medulla	Mouse	Rfc2	Rfc2	Q9WUK4	Replication factor C subunit 2	0.356505	11.116	0.000542215	0.026151	4.99377	0.052051
Kid. Medulla	Mouse	Coro1b	Coro1b	Q9WUM3	Coronin-1B	0.251234	14.0725	0.00631243	0.0880305	3.44175	-2.39692
Kid. Medulla	Mouse	Coro1c	Coro1c	Q9WUM4	Coronin-1C	0.0884519	14.0894	0.305308	0.566807	1.08045	-5.97598
Kid. Medulla	Mouse	Suclg1	Suclg1	Q9WUM5	Succinate--CoA ligase [ADP/GDP-forming] subunit alpha, mitochondrial	-0.260926	15.3437	0.0655651	0.260179	-2.06742	-4.65863
Kid. Medulla	Mouse	Tbk1	Tbk1	Q9WUN2	Serine/threonine-protein kinase TBK1	0.127009	10.9342	0.0764201	0.278103	1.97567	-4.79957
Kid. Medulla	Mouse	Ramp3	Ramp3	Q9WUP1	Receptor activity-modifying protein 3	-0.129874	11.1023	0.54261	0.745743	-0.630335	-6.36082
Kid. Medulla	Mouse	Srd5a3	Srd5a3	Q9WUP4	Polyprenol reductase	0.165238	10.6665	0.329173	0.587195	1.02577	-6.03179
Kid. Medulla	Mouse	Uchl5	Uchl5	Q9WUP7	Ubiquitin carboxyl-terminal hydrolase isozyme L5	0.222947	12.5359	0.0086383	0.0995956	3.25556	-2.70729
Kid. Medulla	Mouse	Preb	Preb	Q9WUQ2	Prolactin regulatory element-binding protein	-0.164343	13.2306	0.0578833	0.246163	-2.14154	-4.54299
Kid. Medulla	Mouse	Tinag	Tinag	Q9WUR0	Tubulo-interstitial nephritis antigen	-0.282208	14.4729	0.0425117	0.211424	-2.32358	-4.25325
Kid. Medulla	Mouse	Nt5dc2	Nt5dc2	A0A2I3BR81	5'-nucleotidase domain containing 2	0.034548	10.8029	0.818315	0.906879	0.235842	-6.541
Kid. Medulla	Mouse	Ak4	Ak4	Q9WUR9	Adenylate kinase 4, mitochondrial	-0.226007	15.7364	0.0590019	0.247834	-2.13018	-4.56081
Kid. Medulla	Mouse	Ctsz	Ctsz	Q9WUU7	Cathepsin Z	0.383001	13.6147	0.0174699	0.136484	2.84259	-3.39836
Kid. Medulla	Mouse	Mcm3ap	Mcm3ap	Q9WUU9	Germinal-center associated nuclear protein	0.124877	10.5074	0.173519	0.41997	1.46545	-5.5236
Kid. Medulla	Mouse	Rbmx	Rbmx	Q9WV02	RNA-binding motif protein, X chromosome	-0.0445932	14.091	0.602794	0.781779	-0.537324	-6.41742
Kid. Medulla	Mouse	Fam50a	Fam50a	Q9WV03	Protein FAM50A	0.159486	10.9828	0.0838854	0.291304	1.91944	-4.8846
Kid. Medulla	Mouse	Atp1a4	Atp1a4	Q9WV27	Sodium/potassium-transporting ATPase subunit alpha-4		8.19671
Kid. Medulla	Mouse	Mpp2	Mpp2	Q9WV34	MAGUK p55 subfamily member 2	0.043503	10.6803	0.68048	0.830419	0.424088	-6.47478
Kid. Medulla	Mouse	Slc2a5	Slc2a5	Q9WV38	Solute carrier family 2, facilitated glucose transporter member 5	-0.738955	10.1492	0.0165696	0.133521	-2.87346	-3.34678
Kid. Medulla	Mouse	Plek2	Plek2	Q9WV52	Pleckstrin-2	0.579702	8.25511	0.0950143	0.309075	1.84373	-4.99732
Kid. Medulla	Mouse	Asah1	Asah1	Q9WV54	Acid ceramidase	0.493156	13.4289	0.0083684	0.0983671	3.27432	-2.67594
Kid. Medulla	Mouse	Acbd5	Acbd5	A0A2I3BRB9;Z4YM84	Acyl-CoA-binding domain-containing protein 5	-0.107013	12.2201	0.464853	0.689212	-0.759896	-6.26826
Kid. Medulla	Mouse	Vapa	Vapa	Q9WV55	Vesicle-associated membrane protein-associated protein A	0.00511328	13.4105	0.94236	0.969798	0.0741413	-6.56795
Kid. Medulla	Mouse	Decr2	Decr2	Q9WV68	Peroxisomal 2,4-dienoyl-CoA reductase [(3E)-enoyl-CoA-producing]	-0.128761	13.1084	0.361472	0.61312	-0.95629	-6.09929
Kid. Medulla	Mouse	Dmtn	Dmtn	Q9WV69	Dematin	-0.205652	13.4236	0.0783534	0.281107	-1.96063	-4.82242
Kid. Medulla	Mouse	Nme3	Nme3	Q9WV85	Nucleoside diphosphate kinase 3	-0.172973	12.8171	0.0904887	0.300893	-1.87347	-4.95329
Kid. Medulla	Mouse	Stxbp4	Stxbp4	Q9WV89	Syntaxin-binding protein 4	-0.00443296	11.132	0.957553	0.978264	-0.0545736	-6.56931
Kid. Medulla	Mouse	Ptgfrn	Ptgfrn	Q9WV91	Prostaglandin F2 receptor negative regulator	0.404699	10.8888	0.0223588	0.15346	2.69879	-3.63796
Kid. Medulla	Mouse	Phlda3	Phlda3	Q9WV95	Pleckstrin homology-like domain family A member 3	-0.057907	9.52418	0.767322	0.879268	-0.30405	-6.52128
Kid. Medulla	Mouse	Timm10b	Timm10b	Q9WV96	Mitochondrial import inner membrane translocase subunit Tim10 B	-0.317607	11.7177	0.0920173	0.303565	-1.86328	-4.96842
Kid. Medulla	Mouse	Timm9	Timm9	Q9WV98	Mitochondrial import inner membrane translocase subunit Tim9	-0.356636	14.1891	0.0492206	0.226951	-2.23739	-4.39136
Kid. Medulla	Mouse	Timm8a1	Timm8a1	Q9WVA2	Mitochondrial import inner membrane translocase subunit Tim8 A	-0.0682519	12.0677	0.667121	0.822566	-0.443105	-6.46605
Kid. Medulla	Mouse	Adcy6	Adcy6	A0A2I3BRC5;F8VQ52	Adenylate cyclase type 6	-0.28272	11.3534	0.0992451	0.316008	-1.8171	-5.03647
Kid. Medulla	Mouse	Tagln2	Tagln2	Q9WVA4	Transgelin-2	0.558731	14.7531	0.00178987	0.0489232	4.21347	-1.14119
Kid. Medulla	Mouse	Rbpms	Rbpms	Q9WVB0	RNA-binding protein with multiple splicing	0.0987446	13.2381	0.43949	0.671758	0.805089	-6.23235
Kid. Medulla	Mouse	Slit3	Slit3	Q9WVB4	Slit homolog 3 protein	0.587181	10.0557	0.101627	0.318992	1.80256	-5.05772
Kid. Medulla	Mouse	Cav2	Cav2	Q9WVC3	Caveolin-2	-0.763652	10.756	3.09946e-05	0.00675945	-7.15125	2.87176
Kid. Medulla	Mouse	Clcn5	Clcn5	Q9WVD4	H(+)/Cl(-) exchange transporter 5	-0.111424	11.9629	0.256734	0.513185	-1.20286	-5.84297
Kid. Medulla	Mouse	Slc25a15	Slc25a15	Q9WVD5	Mitochondrial ornithine transporter 1	-0.287705	13.6121	0.091049	0.301633	-1.86972	-4.95887
Kid. Medulla	Mouse	Pacsin2	Pacsin2	Q9WVE8	Protein kinase C and casein kinase substrate in neurons protein 2	-0.0858248	14.2322	0.404713	0.646289	-0.869973	-6.17765
Kid. Medulla	Mouse	Tusc2	Tusc2	Q9WVF8	Tumor suppressor candidate 2	0.0790287	10.2872	0.612326	0.787919	0.523057	-6.42536
Kid. Medulla	Mouse	Msl3	Msl3	Q9WVG9	Male-specific lethal 3 homolog	-0.312526	8.06058	0.526493	0.734725	-0.658839	-6.2517
Kid. Medulla	Mouse	Foxo3	Foxo3	Q9WVH4	Forkhead box protein O3	-0.0313806	8.52959	0.779712	0.885757	-0.287349	-6.52656
Kid. Medulla	Mouse	Tbc1d23	Tbc1d23	A0A2I3BRD1;Q8K0F1	TBC1 domain family member 23	-0.180527	10.8353	0.0356891	0.194893	-2.42606	-4.08718
Kid. Medulla	Mouse	Psmd13	Psmd13	Q9WVJ2	26S proteasome non-ATPase regulatory subunit 13	0.0969181	13.5952	0.146185	0.385588	1.57564	-5.37746
Kid. Medulla	Mouse	Cpq	Cpq	Q9WVJ3	Carboxypeptidase Q	0.571915	13.2692	0.011298	0.114717	3.0975	-2.97175
Kid. Medulla	Mouse	Agtrap	Agtrap	Q9WVK0	Type-1 angiotensin II receptor-associated protein	0.0351357	10.6096	0.766434	0.878829	0.305251	-6.52089
Kid. Medulla	Mouse	Ehd1	Ehd1	Q9WVK4	EH domain-containing protein 1	-0.152838	13.8892	0.0328399	0.186487	-2.47468	-4.00779
Kid. Medulla	Mouse	Gstz1	Gstz1	Q9WVL0	Maleylacetoacetate isomerase	-0.269397	12.7909	0.0984642	0.315492	-1.82193	-5.02938
Kid. Medulla	Mouse	Ap4s1	Ap4s1	Q9WVL1	AP-4 complex subunit sigma-1	0.0788229	10.4702	0.565493	0.761169	0.594331	-6.38373
Kid. Medulla	Mouse	Slc12a7	Slc12a7	Q9WVL3	Solute carrier family 12 member 7	-0.00325267	12.6632	0.978187	0.989286	-0.0280335	-6.57049
Kid. Medulla	Mouse	Racgap1	Racgap1	Q9WVM1	Rac GTPase-activating protein 1	0.131865	13.3804	0.420613	0.658516	0.839858	-6.20349
Kid. Medulla	Mouse	Aadat	Aadat	Q9WVM8	Kynurenine/alpha-aminoadipate aminotransferase, mitochondrial	-0.836594	16.4309	0.0732599	0.27296	-2.00104	-4.76086
Kid. Medulla	Mouse	Apip	Apip	Q9WVQ5	Methylthioribulose-1-phosphate dehydratase	0.194445	11.9856	0.0397846	0.20532	2.36246	-4.19045
Kid. Medulla	Mouse	Eny2	Eny2	A0A2I3BRK6;Q9JIX0	Transcription and mRNA export factor ENY2	0.223821	12.4076	0.0807995	0.285683	1.94209	-4.85048
Kid. Medulla	Mouse	Prkn	Prkn	Q9WVS6	E3 ubiquitin-protein ligase parkin	0.250651	7.66392	0.221977	0.477796	1.30239	-5.72708
Kid. Medulla	Mouse	Map2k5	Map2k5	Q9WVS7	Dual specificity mitogen-activated protein kinase kinase 5	0.0806116	9.93388	0.451066	0.680917	0.784257	-6.24913
Kid. Medulla	Mouse	Mapk7	Mapk7	Q9WVS8	Mitogen-activated protein kinase 7		0
Kid. Medulla	Mouse	Ca14	Ca14	Q9WVT6	Carbonic anhydrase 14	-0.332234	12.8421	0.175995	0.422965	-1.45623	-5.53552
Kid. Medulla	Mouse	Ncdn	Ncdn	Q9Z0E0	Neurochondrin	0.114223	10.5894	0.262133	0.518899	1.1884	-5.85925
Kid. Medulla	Mouse	Gbp2	Gbp2	Q9Z0E6	Guanylate-binding protein 2	0.411864	11.6526	0.0207694	0.147833	2.74175	-3.56652
Kid. Medulla	Mouse	Slc22a5	Slc22a5	Q9Z0E8	Organic cation/carnitine transporter 2	-0.513137	11.5971	0.0529829	0.236944	-2.19391	-4.46041
Kid. Medulla	Mouse	Rad9a	Rad9a	Q9Z0F6	Cell cycle checkpoint control protein RAD9A	0.0668013	9.15065	0.588754	0.773426	0.558553	-6.40525
Kid. Medulla	Mouse	Sncg	Sncg	Q9Z0F7	Gamma-synuclein	0.185397	12.3391	0.38811	0.634773	0.902307	-6.14903
Kid. Medulla	Mouse	Adam17	Adam17	Q9Z0F8	Disintegrin and metalloproteinase domain-containing protein 17	0.27348	10.9439	0.00370073	0.0666651	3.76347	-1.86615
Kid. Medulla	Mouse	Flywch1	Flywch1	A0A2I3BRL2;Q8CI03	FLYWCH-type zinc finger 1 (Fragment);FLYWCH-type zinc finger-containing protein 1	-0.085549	9.28326	0.809751	0.901972	-0.247205	-6.53805
Kid. Medulla	Mouse	Gipc1	Gipc1	Q9Z0G0	PDZ domain-containing protein GIPC1	0.127002	12.5164	0.105051	0.325504	1.78219	-5.08734
Kid. Medulla	Mouse	Zbtb22	Zbtb22	Q9Z0G7	Zinc finger and BTB domain-containing protein 22		7.50745
Kid. Medulla	Mouse	Cldn3	Cldn3	Q9Z0G9	Claudin-3	0.0329352	12.1928	0.93522	0.966721	0.0833479	-6.56717
Kid. Medulla	Mouse	Wdr46	Wdr46	Q9Z0H1	WD repeat-containing protein 46	0.122016	9.57307	0.225998	0.482298	1.29025	-5.74157
Kid. Medulla	Mouse	Smarcb1	Smarcb1	Q9Z0H3	SWI/SNF-related matrix-associated actin-dependent regulator of chromatin subfamily B member 1	0.0915748	11.621	0.448595	0.679589	0.788674	-6.2456
Kid. Medulla	Mouse	Bcl10	Bcl10	Q9Z0H7	B-cell lymphoma/leukemia 10	0.196873	10.0839	0.482318	0.70123	0.729695	-6.29122
Kid. Medulla	Mouse	Clip2	Clip2	Q9Z0H8	CAP-Gly domain-containing linker protein 2	0.177779	11.7253	0.0582535	0.246939	2.13776	-4.54893
Kid. Medulla	Mouse	Slfn1	Slfn1	Q9Z0I7	Schlafen family member 1	0.684081	7.77041	0.424829	0.660987	0.921305	-5.4935
Kid. Medulla	Mouse	Npc2	Npc2	Q9Z0J0	NPC intracellular cholesterol transporter 2	0.0831567	12.1907	0.731256	0.861636	0.35322	-6.50404
Kid. Medulla	Mouse	Reck	Reck	Q9Z0J1	Reversion-inducing cysteine-rich protein with Kazal motifs	-0.0210721	10.0164	0.857805	0.928557	-0.18385	-6.55271
Kid. Medulla	Mouse	Tinf2	Tinf2	A0A2I3BRL3;Q8K1K3;Q9QXG9	Terf1 (TRF1)-interacting nuclear factor 2;Terf1 (TRF1)-interacting nuclear factor 2;TERF1-interacting nuclear factor 2	0.288635	8.12684	0.0542368	0.239831	2.30934	-4.14849
Kid. Medulla	Mouse	Vnn1	Vnn1	Q9Z0K8	Pantetheinase	0.230811	12.4471	0.0870822	0.296758	1.89678	-4.91856
Kid. Medulla	Mouse	Tpbg	Tpbg	Q9Z0L0	Trophoblast glycoprotein	0.232033	9.84698	0.271851	0.530051	1.16294	-5.88754
Kid. Medulla	Mouse	Ggh	Ggh	Q9Z0L8	Gamma-glutamyl hydrolase	0.455334	10.9079	0.161242	0.406527	1.51292	-5.46144
Kid. Medulla	Mouse	Lipa	Lipa	Q9Z0M5	Lysosomal acid lipase/cholesteryl ester hydrolase	0.299742	12.8999	0.0398115	0.20532	2.36207	-4.19109
Kid. Medulla	Mouse	Eif2s3x	Eif2s3x	Q9Z0N1	Eukaryotic translation initiation factor 2 subunit 3, X-linked	0.0135039	13.8498	0.891499	0.946016	0.139923	-6.56037
Kid. Medulla	Mouse	Eif2s3y	Eif2s3y	Q9Z0N2	Eukaryotic translation initiation factor 2 subunit 3, Y-linked	-0.0770343	10.8299	0.624544	0.796428	-0.515644	-6.1946
Kid. Medulla	Mouse	Palm	Palm	Q9Z0P4	Paralemmin-1	-0.034136	13.2157	0.745078	0.868834	-0.334273	-6.51098
Kid. Medulla	Mouse	Twf2	Twf2	Q9Z0P5	Twinfilin-2	0.498469	12.8219	3.16935e-05	0.00676372	7.1325	2.85019
Kid. Medulla	Mouse	Fads2	Fads2	Q9Z0R9	Acyl-CoA 6-desaturase	0.0458978	11.7506	0.619006	0.791965	0.513127	-6.43076
Kid. Medulla	Mouse	Bpnt1	Bpnt1	Q9Z0S1	3'(2'),5'-bisphosphate nucleotidase 1	-0.189845	15.5988	0.0282866	0.171968	-2.56176	-3.86476
Kid. Medulla	Mouse	Gm28778	Gm28778;Ormdl1	A0A087WSK7;Q921I0	N(6)-L-threonylcarbamoyladenine synthase (Fragment);ORM1-like protein 1	-0.247075	10.3151	0.292138	0.55085	-1.11204	-5.94271
Kid. Medulla	Mouse	Gm7324	Gm7324;Rbmxl1	A0A2I3BRL8;Q91VM5	Predicted gene 7324;RNA binding motif protein, X-linked-like-1	0.0544471	11.9134	0.676196	0.828323	0.430168	-6.47203
Kid. Medulla	Mouse	Cldn15	Cldn15	Q9Z0S5	Claudin-15	-0.247869	8.53747	0.465142	0.689212	-0.759392	-6.26865
Kid. Medulla	Mouse	Cldn10	Cldn10	Q9Z0S6	Claudin-10	-0.765492	10.5616	0.0241143	0.158749	-2.65476	-3.71103
Kid. Medulla	Mouse	Itgb6	Itgb6	Q9Z0T9	Integrin beta-6	0.222624	11.1341	0.161342	0.406527	1.51252	-5.46197
Kid. Medulla	Mouse	Timm17b	Timm17b	Q9Z0V7	Mitochondrial import inner membrane translocase subunit Tim17-B	-0.252274	12.1895	0.0744496	0.27497	-1.99137	-4.77564
Kid. Medulla	Mouse	Timm17a	Timm17a	Q9Z0V8	Mitochondrial import inner membrane translocase subunit Tim17-A	-0.262416	10.566	0.178542	0.42589	-1.44687	-5.54758
Kid. Medulla	Mouse	Ngfr	Ngfr	Q9Z0W1	Tumor necrosis factor receptor superfamily member 16	0.399221	9.70572	0.0859035	0.294485	1.90504	-4.90619
Kid. Medulla	Mouse	Nup160	Nup160	Q9Z0W3	Nuclear pore complex protein Nup160	0.156018	11.4856	0.0657201	0.260293	2.06601	-4.66081
Kid. Medulla	Mouse	Pde3a	Pde3a	Q9Z0X4	cGMP-inhibited 3',5'-cyclic phosphodiesterase 3A	0.64101	10.4195	0.00110259	0.03813	4.5233	-0.656904
Kid. Medulla	Mouse	Dctn3	Dctn3	Q9Z0Y1	Dynactin subunit 3	-0.0392976	15.3393	0.624319	0.796325	-0.505268	-6.43497
Kid. Medulla	Mouse	Heph	Heph	Q9Z0Z4	Hephaestin	0.541042	10.7697	0.00325678	0.0634639	3.84151	-1.7388
Kid. Medulla	Mouse	Hnrnpc	Hnrnpc	A0A2I3BRM6	Heterogeneous nuclear ribonucleoprotein C (Fragment)	0.0279252	10.7383	0.926763	0.962834	0.0942615	-6.56613
Kid. Medulla	Mouse	Cpxm1	Cpxm1	Q9Z100	Probable carboxypeptidase X1	0.91881	9.84237	0.143971	0.3832	1.64497	-5.14029
Kid. Medulla	Mouse	Adnp	Adnp	Q9Z103	Activity-dependent neuroprotector homeobox protein	0.326418	11.2954	0.00104961	0.0370982	4.55528	-0.607684
Kid. Medulla	Mouse	Hmg20b	Hmg20b	Q9Z104	SWI/SNF-related matrix-associated actin-dependent regulator of chromatin subfamily E member 1-related	-1.0688	9.0087	0.0179916	0.138555	-2.96556	-3.25665
Kid. Medulla	Mouse	Aldh18a1	Aldh18a1	Q9Z110	Delta-1-pyrroline-5-carboxylate synthase	0.326573	10.845	0.047881	0.224614	2.25365	-4.36542
Kid. Medulla	Mouse	Mettl1	Mettl1	Q9Z120	tRNA (guanine-N(7)-)-methyltransferase	0.551573	10.0683	0.00251012	0.0566711	4.00197	-1.47899
Kid. Medulla	Mouse	Slc7a5	Slc7a5	Q9Z127	Large neutral amino acids transporter small subunit 1	0.45889	10.4311	0.0378337	0.200523	2.39191	-4.14271
Kid. Medulla	Mouse	Hnrnpdl	Hnrnpdl	Q9Z130	Heterogeneous nuclear ribonucleoprotein D-like	0.369001	12.1569	0.0077022	0.0949113	3.32344	-2.59395
Kid. Medulla	Mouse	Sh3bp5	Sh3bp5	Q9Z131	SH3 domain-binding protein 5	0.0493348	10.3657	0.605078	0.782889	0.533895	-6.41935
Kid. Medulla	Mouse	Ror1	Ror1	Q9Z139	Inactive tyrosine-protein kinase transmembrane receptor ROR1	0.204034	9.66786	0.0102599	0.108753	3.15414	-2.87692
Kid. Medulla	Mouse	Cog1	Cog1	Q9Z160	Conserved oligomeric Golgi complex subunit 1	0.0133876	11.5766	0.830072	0.911921	0.220297	-6.5448
Kid. Medulla	Mouse	AI182371	AI182371	A0A2I3BRQ1	Expressed sequence AI182371	0.613236	10.2036	0.00323485	0.0631566	3.97397	-1.64522
Kid. Medulla	Mouse	Loxl3	Loxl3	Q9Z175	Lysyl oxidase homolog 3	0.934645	8.30009	0.290517	0.548903	1.15893	-5.65838
Kid. Medulla	Mouse	Dyrk1b	Dyrk1b	Q9Z188	Dual specificity tyrosine-phosphorylation-regulated kinase 1B	0.148634	8.83799	0.385386	0.632236	0.907703	-6.14417
Kid. Medulla	Mouse	Tfg	Tfg	Q9Z1A1	TFG protein	0.052188	13.766	0.526391	0.734682	0.656385	-6.34347
Kid. Medulla	Mouse	Plcb1	Plcb1	Q9Z1B3	1-phosphatidylinositol 4,5-bisphosphate phosphodiesterase beta-1	0.0194927	11.9766	0.752574	0.872808	0.324053	-6.51457
Kid. Medulla	Mouse	Mad2l1	Mad2l1	Q9Z1B5	Mitotic spindle assembly checkpoint protein MAD2A	0.777937	8.91196	0.154235	0.397242	1.54144	-5.42351
Kid. Medulla	Mouse	Mapk13	Mapk13	Q9Z1B7	Mitogen-activated protein kinase 13	0.067423	10.635	0.43235	0.666504	0.81812	-6.22166
Kid. Medulla	Mouse	Eif3g	Eif3g	Q9Z1D1	Eukaryotic translation initiation factor 3 subunit G	0.0630781	13.9046	0.356603	0.609223	0.966463	-6.08965
Kid. Medulla	Mouse	Nfkbia	Nfkbia	Q9Z1E3	NF-kappa-B inhibitor alpha	0.296606	9.51982	0.00786622	0.0956194	3.31095	-2.61479
Kid. Medulla	Mouse	Gys1	Gys1	Q9Z1E4	Glycogen [starch] synthase, muscle	-0.185595	12.448	0.115102	0.340884	-1.72574	-5.16856
Kid. Medulla	Mouse	Uba2	Uba2	Q9Z1F9	SUMO-activating enzyme subunit 2	0.274414	13.3335	0.00513254	0.0800738	3.56563	-2.19156
Kid. Medulla	Mouse	Mapk1ip1l	Mapk1ip1l	A0A2I3BRS9;Q8BH93	Mitogen-activated protein kinase 1 interacting protein 1-like (Fragment);MAPK-interacting and spindle-stabilizing protein-like	-0.178061	10.4912	0.458365	0.685674	-0.771302	-6.25937
Kid. Medulla	Mouse	Atp6v1c1	Atp6v1c1	Q9Z1G3	V-type proton ATPase subunit C 1	-0.107565	13.9018	0.341123	0.597777	-0.9995	-6.05776
Kid. Medulla	Mouse	Nfs1	Nfs1	Q9Z1J3	Cysteine desulfurase	-0.129463	14.0934	0.351271	0.605638	-0.977721	-6.07888
Kid. Medulla	Mouse	Arih1	Arih1	Q9Z1K5	E3 ubiquitin-protein ligase ARIH1	0.0292085	11.5114	0.826424	0.909963	0.225114	-6.54365
Kid. Medulla	Mouse	Arih2	Arih2	Q9Z1K6	E3 ubiquitin-protein ligase ARIH2	0.0309788	11.1552	0.71997	0.854229	0.368793	-6.49805
Kid. Medulla	Mouse	P2rx7	P2rx7	Q9Z1M0	P2X purinoceptor 7	0.675801	9.78275	0.00208443	0.0528846	4.11773	-1.29341
Kid. Medulla	Mouse	Rps6kb2	Rps6kb2	Q9Z1M4	Ribosomal protein S6 kinase beta-2	-0.0976751	10.6187	0.445106	0.676604	-0.794937	-6.24058
Kid. Medulla	Mouse	Ik	Ik	Q9Z1M8	Protein Red	0.057693	12.0147	0.404837	0.646352	0.869735	-6.17785
Kid. Medulla	Mouse	Ddx39b	Ddx39b	Q9Z1N5	Spliceosome RNA helicase Ddx39b	0.113564	14.842	0.110369	0.334007	1.75174	-5.13132
Kid. Medulla	Mouse	Ndufa7	Ndufa7	Q9Z1P6	NADH dehydrogenase [ubiquinone] 1 alpha subcomplex subunit 7	-0.24528	15.0248	0.0232941	0.156344	-2.67492	-3.6776
Kid. Medulla	Mouse	Kank3	Kank3	Q9Z1P7	KN motif and ankyrin repeat domain-containing protein 3	-0.171405	12.2682	0.0549333	0.241142	-2.17253	-4.49421
Kid. Medulla	Mouse	Spcs1	Spcs1	A0A2I3BRW0	Signal peptidase complex subunit 1	0.0605494	11.3966	0.513637	0.724869	0.677203	-6.32914
Kid. Medulla	Mouse	Angptl4	Angptl4	Q9Z1P8	Angiopoietin-related protein 4	-0.482422	10.4893	0.0165259	0.133274	-2.87499	-3.34421
Kid. Medulla	Mouse	Abhd16a	Abhd16a	Q9Z1Q2	Phosphatidylserine lipase ABHD16A	-0.111193	13.1681	0.221627	0.477743	-1.30346	-5.7258
Kid. Medulla	Mouse	Clic1	Clic1	Q9Z1Q5	Chloride intracellular channel protein 1	0.0737385	15.3872	0.544676	0.746981	0.627048	-6.36296
Kid. Medulla	Mouse	Vars1	Vars1	Q9Z1Q9	Valine--tRNA ligase	0.172702	13.5619	0.0282732	0.171968	2.56204	-3.8643
Kid. Medulla	Mouse	Apom	Apom	Q9Z1R3	Apolipoprotein M	0.468026	12.15	0.0310059	0.180369	2.55368	-3.8828
Kid. Medulla	Mouse	D17h6s53e	D17h6s53e	Q9Z1R4	Uncharacterized protein C6orf47 homolog	-0.0514604	10.8554	0.596734	0.778267	-0.546454	-6.41224
Kid. Medulla	Mouse	Ap3b1	Ap3b1	Q9Z1T1	AP-3 complex subunit beta-1	0.0733279	13.1214	0.23609	0.492354	1.26054	-5.77661
Kid. Medulla	Mouse	Thbs4	Thbs4	Q9Z1T2	Thrombospondin-4	0.00197568	8.88694	0.998301	0.999326	0.002197	-6.48167
Kid. Medulla	Mouse	Atp12a	Atp12a	Q9Z1W8	Potassium-transporting ATPase alpha chain 2	-0.528803	10.5611	0.0469534	0.222315	-2.26517	-4.34702
Kid. Medulla	Mouse	Stk39	Stk39	Q9Z1W9	STE20/SPS1-related proline-alanine-rich protein kinase	0.170923	10.6925	0.21919	0.475363	1.31091	-5.71685
Kid. Medulla	Mouse	Ralgapa1	Ralgapa1	A0A2I3BRX9	Ral GTPase activating protein, alpha subunit 1	0.0583664	11.4384	0.324196	0.582065	1.03692	-6.0206
Kid. Medulla	Mouse	Ptdss2	Ptdss2	Q9Z1X2	Phosphatidylserine synthase 2	0.118526	12.1884	0.248148	0.503268	1.22638	-5.81619
Kid. Medulla	Mouse	Ilf3	Ilf3	Q9Z1X4	Interleukin enhancer-binding factor 3	0.133105	12.1444	0.0781533	0.280782	1.96217	-4.82008
Kid. Medulla	Mouse	Trip6	Trip6	Q9Z1Y4	Thyroid receptor-interacting protein 6	0.222411	12.1826	0.113809	0.339308	1.73274	-5.15855
Kid. Medulla	Mouse	Uso1	Uso1	Q9Z1Z0	General vesicular transport factor p115	0.00043467	13.5638	0.993797	0.996453	0.00797109	-6.57088
Kid. Medulla	Mouse	Strap	Strap	Q9Z1Z2	Serine-threonine kinase receptor-associated protein	0.0858239	13.3984	0.237144	0.493347	1.2575	-5.78017
Kid. Medulla	Mouse	Hnrnpc	Hnrnpc	Q9Z204	Heterogeneous nuclear ribonucleoproteins C1/C2	0.109165	13.7867	0.166548	0.414047	1.49203	-5.48894
Kid. Medulla	Mouse	Pex11b	Pex11b	Q9Z210	Peroxisomal membrane protein 11B	-0.0603539	11.8537	0.836519	0.915571	-0.211798	-6.54677
Kid. Medulla	Mouse	Pex11a	Pex11a	Q9Z211	Peroxisomal membrane protein 11A	-0.198654	13.1482	0.456544	0.684548	-0.774522	-6.25684
Kid. Medulla	Mouse	B3GNT2	B3GNT2	Q9Z222	N-acetyllactosaminide beta-1,3-N-acetylglucosaminyltransferase 2	-0.0551953	10.0339	0.597493	0.778742	-0.545308	-6.4129
Kid. Medulla	Mouse	Fkbp9	Fkbp9	Q9Z247	Peptidyl-prolyl cis-trans isomerase FKBP9	0.140738	11.9368	0.150752	0.392682	1.55604	-5.40392
Kid. Medulla	Mouse	Nsmce2	Nsmce2	A0A2I3BS18;Q91VT1	E3 SUMO-protein ligase NSE2	0.201997	10.0535	0.318465	0.577608	1.04992	-6.00743
Kid. Medulla	Mouse	P2rx4	P2rx4	Q9Z257	P2X purinoceptor	0.316485	10.7819	0.0158396	0.131569	2.89975	-3.30282
Kid. Medulla	Mouse	Cldn8	Cldn8	Q9Z260	Claudin-8	-0.210624	10.4413	0.273097	0.531771	-1.15973	-5.89107
Kid. Medulla	Mouse	Chek2	Chek2	Q9Z265	Serine/threonine-protein kinase Chk2	0.550111	10.1565	0.0852783	0.293514	2.14031	-4.38476
Kid. Medulla	Mouse	Snapin	Snapin	Q9Z266	SNARE-associated protein Snapin	-0.0579447	11.2641	0.701967	0.843692	-0.393839	-6.4879
Kid. Medulla	Mouse	Rasal1	Rasal1	Q9Z268	RasGAP-activating-like protein 1	-0.684398	10.0689	0.0226469	0.153942	-2.74536	-3.57735
Kid. Medulla	Mouse	Baz1b	Baz1b	Q9Z277	Tyrosine-protein kinase BAZ1B	0.0427156	12.0937	0.611909	0.78775	0.52368	-6.42501
Kid. Medulla	Mouse	Dgat1	Dgat1	Q9Z2A7	Diacylglycerol O-acyltransferase 1	-0.202788	11.8002	0.24712	0.502377	-1.22924	-5.81291
Kid. Medulla	Mouse	Ggt5	Ggt5	Q9Z2A9	Glutathione hydrolase 5 proenzyme	0.449213	11.8575	0.0116501	0.116213	3.07949	-3.00191
Kid. Medulla	Mouse	Rps6ka4	Rps6ka4	Q9Z2B9	Ribosomal protein S6 kinase alpha-4	0.0662318	10.9507	0.591551	0.77547	0.554302	-6.40772
Kid. Medulla	Mouse	Mtmr1	Mtmr1	Q9Z2C4	Myotubularin-related protein 1	-0.146117	11.05	0.164679	0.411798	-1.49932	-5.47937
Kid. Medulla	Mouse	Itih4	Itih4	A0A2K6EDJ7	Inter alpha-trypsin inhibitor, heavy chain 4	0.846903	9.94724	0.0646674	0.258823	2.07564	-4.64587
Kid. Medulla	Mouse	Upk1b	Upk1b	Q9Z2C6	Uroplakin-1b	0.398008	11.7079	0.480972	0.700348	0.731999	-6.2895
Kid. Medulla	Mouse	Mtmr7	Mtmr7	Q9Z2C9	Myotubularin-related protein 7	0.234845	8.40066	0.702047	0.843692	0.393726	-6.48795
Kid. Medulla	Mouse	Mtmr9	Mtmr9	Q9Z2D0	Myotubularin-related protein 9	0.187474	10.9574	0.0935689	0.305927	1.85309	-4.98351
Kid. Medulla	Mouse	Mtmr2	Mtmr2	Q9Z2D1	Myotubularin-related protein 2	0.0325926	11.4953	0.70105	0.843401	0.395121	-6.48736
Kid. Medulla	Mouse	Mecp2	Mecp2	Q9Z2D6	Methyl-CpG-binding protein 2	-0.129892	13.4936	0.165401	0.412652	-1.4965	-5.48309
Kid. Medulla	Mouse	Mbd2	Mbd2	Q9Z2E1	Methyl-CpG-binding domain protein 2	0.222889	11.4501	0.0234933	0.157081	2.66996	-3.68583
Kid. Medulla	Mouse	Oasl2	Oasl2	Q9Z2F2	2'-5'-oligoadenylate synthase-like protein 2	0.736913	10.1995	0.0650659	0.259305	2.07198	-4.65156
Kid. Medulla	Mouse	Bcl3	Bcl3	Q9Z2F6	B-cell lymphoma 3 protein homolog		7.52926
Kid. Medulla	Mouse	Fem1b	Fem1b	Q9Z2G0	Protein fem-1 homolog B	-0.0908826	9.79136	0.361709	0.61332	-0.955796	-6.09976
Kid. Medulla	Mouse	Fem1aa	Fem1aa	Q9Z2G1	Protein fem-1 homolog A-A	-0.0612562	9.87507	0.644936	0.809724	-0.47508	-6.45055
Kid. Medulla	Mouse	Nudcd1	Nudcd1	A0A2K6EDK3	NudC domain-containing protein 1	0.193989	9.20158	0.1113	0.335438	1.74654	-5.13878
Kid. Medulla	Mouse	Epb41l1	Epb41l1	Q9Z2H5	Band 4.1-like protein 1	-0.19386	8.7859	0.80737	0.900592	-0.25037	-6.53721
Kid. Medulla	Mouse	Gipc2	Gipc2	Q9Z2H7	PDZ domain-containing protein GIPC2	-0.0244311	12.5708	0.76597	0.878829	-0.305878	-6.52069
Kid. Medulla	Mouse	Letm1	Letm1	Q9Z2I0	Mitochondrial proton/calcium exchanger protein	-0.290844	13.75	0.0142635	0.125387	-2.96098	-3.20037
Kid. Medulla	Mouse	Suclg2	Suclg2	Q9Z2I8	Succinate--CoA ligase [GDP-forming] subunit beta, mitochondrial	-0.26266	15.6786	0.0221415	0.152725	-2.70448	-3.6285
Kid. Medulla	Mouse	Sucla2	Sucla2	Q9Z2I9	Succinate--CoA ligase [ADP-forming] subunit beta, mitochondrial	-0.39497	15.9793	0.00316468	0.062405	-3.85909	-1.71019
Kid. Medulla	Mouse	Slc23a1	Slc23a1	Q9Z2J0	Solute carrier family 23 member 1	-0.483286	14.7586	0.0168229	0.134073	-2.8646	-3.36158
Kid. Medulla	Mouse	Krt16	Krt16	Q9Z2K1	Keratin, type I cytoskeletal 16	0.296393	10.9013	0.128476	0.361183	1.65718	-5.26529
Kid. Medulla	Mouse	Minpp1	Minpp1	Q9Z2L6	Multiple inositol polyphosphate phosphatase 1	0.136645	10.7407	0.405319	0.646735	0.86881	-6.17866
Kid. Medulla	Mouse	Crlf3	Crlf3	Q9Z2L7	Cytokine receptor-like factor 3	0.376567	10.8583	0.00814536	0.0970814	3.2903	-2.64925
Kid. Medulla	Mouse	Ubl3	Ubl3	Q9Z2M6	Ubiquitin-like protein 3	-0.0818723	11.7157	0.567101	0.762603	-0.591832	-6.38527
Kid. Medulla	Mouse	Dpep2	Dpep2	A0A2K6EDK8;Q8C255	Dipeptidase (Fragment);Dipeptidase 2	0.653173	6.47854	0.400106	0.643612	0.905481	-5.85262
Kid. Medulla	Mouse	Pmm2	Pmm2	Q9Z2M7	Phosphomannomutase 2	-0.0341844	10.5604	0.766866	0.878844	-0.304666	-6.52108
Kid. Medulla	Mouse	Actl6a	Actl6a	Q9Z2N8	Actin-like protein 6A	0.0958763	12.558	0.219795	0.475623	1.30906	-5.71908
Kid. Medulla	Mouse	Tsc22d3	Tsc22d3	Q9Z2S7	TSC22 domain family protein 3	0.292439	11.2343	0.517322	0.727194	0.671156	-6.33335
Kid. Medulla	Mouse	Krt85	Krt85	Q9Z2T6	Keratin, type II cuticular Hb5		10.0262
Kid. Medulla	Mouse	Psma7	Psma7	Q9Z2U0	Proteasome subunit alpha type-7	0.0986618	14.6584	0.180831	0.429059	1.43855	-5.55826
Kid. Medulla	Mouse	Psma5	Psma5	Q9Z2U1	Proteasome subunit alpha type-5	0.109248	14.315	0.128877	0.361518	1.65523	-5.26801
Kid. Medulla	Mouse	Zfp292	Zfp292	Q9Z2U2	Zinc finger protein 292	0.200422	8.54481	0.568563	0.762956	0.638469	-5.71786
Kid. Medulla	Mouse	Pck1	Pck1	Q9Z2V4	Phosphoenolpyruvate carboxykinase, cytosolic [GTP]	0.0149826	16.2915	0.930394	0.9644	0.0895748	-6.56659
Kid. Medulla	Mouse	Hdac6	Hdac6	Q9Z2V5	Histone deacetylase 6	0.122225	12.6018	0.152743	0.395157	1.54766	-5.41518
Kid. Medulla	Mouse	Stk25	Stk25	Q9Z2W1	Serine/threonine-protein kinase 25	0.00184321	11.8526	0.985594	0.993726	0.0185121	-6.57073
Kid. Medulla	Mouse	Fn1	Fn1	A0A087WSN6	Fibronectin	0.199389	10.9481	0.42522	0.660987	0.831277	-6.21071
Kid. Medulla	Mouse	Mbnl2	Mbnl2	A0A2K6EDM5;Q8C181	Muscleblind like splicing factor 2;Muscleblind-like protein 2	-0.0501329	10.377	0.745779	0.868959	-0.333316	-6.51132
Kid. Medulla	Mouse	Hnrnpf	Hnrnpf	Q9Z2X1	Heterogeneous nuclear ribonucleoprotein F	0.0864401	14.6577	0.19589	0.448587	1.38594	-5.62483
Kid. Medulla	Mouse	Psmd10	Psmd10	Q9Z2X2	26S proteasome non-ATPase regulatory subunit 10	0.160039	10.2028	0.350074	0.604982	0.980266	-6.07644
Kid. Medulla	Mouse	Keap1	Keap1	Q9Z2X8	Kelch-like ECH-associated protein 1	0.133658	12.3395	0.122283	0.352179	1.68808	-5.22195
Kid. Medulla	Mouse	Homer1	Homer1	Q9Z2Y3	Homer protein homolog 1	0.0308792	10.8744	0.814075	0.904726	0.241463	-6.53956
Kid. Medulla	Mouse	Plpbp	Plpbp	Q9Z2Y8	Pyridoxal phosphate homeostasis protein	-0.0113427	14.104	0.90601	0.952143	-0.1211	-6.56301
Kid. Medulla	Mouse	Slc25a20	Slc25a20	Q9Z2Z6	Mitochondrial carnitine/acylcarnitine carrier protein	-0.305322	14.6695	0.00672299	0.0895558	-3.4042	-2.45937
Kid. Medulla	Mouse	Gfpt2	Gfpt2	Q9Z2Z9	Glutamine--fructose-6-phosphate aminotransferase [isomerizing] 2	-0.137486	8.34323	0.640222	0.806672	-0.48194	-6.44709
Kid. Medulla	Mouse	Slc22a4	Slc22a4	Q9Z306	Solute carrier family 22 member 4	-0.54753	12.2355	0.0152992	0.128997	-2.92002	-3.26891
Kid. Medulla	Mouse	Kcnj16	Kcnj16	Q9Z307	Inward rectifier potassium channel 16	-0.278219	11.9255	0.0254066	0.1634	-2.62435	-3.7614
Kid. Medulla	Mouse	Sart1	Sart1	Q9Z315	U4/U6.U5 tri-snRNP-associated protein 1	0.163911	11.8127	0.0894016	0.299964	1.88082	-4.94236
Kid. Medulla	Mouse	Wdhd1	Wdhd1	A0A2K6EDP7;P59328	WD repeat and HMG-box DNA binding protein 1;WD repeat and HMG-box DNA-binding protein 1	0.92127	8.60703	0.320063	0.578189	1.07013	-5.81789
Kid. Medulla	Mouse	Top3b	Top3b	Q9Z321	DNA topoisomerase 3-beta-1	-0.0617309	11.1677	0.448782	0.679738	-0.78834	-6.24587
Kid. Medulla	Mouse	Itpr2	Itpr2	Q9Z329	Inositol 1,4,5-trisphosphate receptor type 2	-0.109432	11.4697	0.403096	0.645482	-0.873082	-6.17493
Kid. Medulla	Mouse	Dcdc2a	Dcdc2a	R4GML1	Doublecortin domain containing 2a	1.53845	8.91182	4.26014e-06	0.00479851	8.97061	4.75174
Kid. Medulla	Mouse	Ank3	Ank3	S4R187;S4R1X7;S4R2C1	Ankyrin 3, epithelial;Ankyrin 3, epithelial;Ankyrin 3, epithelial	-0.0844866	11.2588	0.508636	0.721694	-0.685451	-6.32336
Kid. Medulla	Mouse	Sec31a	Sec31a	S4R192	Sec31 homolog A (S. cerevisiae) (Fragment)	-1.49871	7.48873	0.200507	0.453799	-1.47389	-5.20025
Kid. Medulla	Mouse	Ppfia1	Ppfia1	S4R1D4	Protein tyrosine phosphatase, receptor type, f polypeptide (PTPRF),-interacting protein (liprin), alpha 1 (Fragment)	0.0323566	10.9235	0.777507	0.884413	0.290314	-6.52565
Kid. Medulla	Mouse	Osbpl10	Osbpl10	S4R1M9	Oxysterol-binding protein-related protein 10	-0.0106297	11.4679	0.930717	0.9644	-0.0891576	-6.56663
Kid. Medulla	Mouse	Dst	Dst	S4R1P5	Dystonin	-0.131007	11.9137	0.0587331	0.247549	-2.13289	-4.55656
Kid. Medulla	Mouse	Rbm6	Rbm6	S4R1W5	RNA binding motif protein 6	0.127187	10.6834	0.136049	0.371868	1.62116	-5.31524
Kid. Medulla	Mouse	Sec31a	Sec31a	S4R2A9	Sec31 homolog A (S. cerevisiae) (Fragment)	0.339851	11.0625	0.0466637	0.221567	2.30436	-4.27528
Kid. Medulla	Mouse	Tarbp2	Tarbp2	A0A2R8VHA7;D3YZS5;D3Z282;D6RCY4;D6RE49;P97473	TARBP2, RISC loading complex RNA binding subunit (Fragment);TARBP2, RISC loading complex RNA binding subunit (Fragment);TARBP2, RISC loading complex RNA binding subunit (Fragment);TARBP2, RISC loading complex RNA binding subunit;TARBP2, RISC loading complex RNA binding subunit;RISC-loading complex subunit TARBP2	0.23731	9.66952	0.33444	0.591955	1.0141	-6.04339
Kid. Medulla	Mouse	Ank2	Ank2	S4R2F3	Ankyrin 2, brain	0.160025	7.09993	0.746819	0.869917	0.334203	-6.42073
Kid. Medulla	Mouse	Pdf	Pdf	S4R2K0	Peptide deformylase, mitochondrial	-0.0495436	11.1192	0.707476	0.846228	-0.386147	-6.49109
Kid. Medulla	Mouse	Ank2	Ank2	S4R2R5	Ankyrin 2, brain	0.186813	9.21599	0.355315	0.608619	0.969172	-6.08707
Kid. Medulla	Mouse	Vstm4	Vstm4	T1NXB5	V-set and transmembrane domain-containing protein 4	0.578422	8.63003	0.105153	0.325527	1.80141	-5.03093
Kid. Medulla	Mouse	Cep63	Cep63	U5KVR9	Centrosomal protein 63	0.394956	8.27328	0.317933	0.577582	1.05113	-6.00619
Kid. Medulla	Mouse	Tpd52l2	Tpd52l2	V9GWU5	Tumor protein D52-like 2 (Fragment)	0.999965	7.9746	0.0224127	0.15346	2.75172	-3.5672
Kid. Medulla	Mouse	Myo6	Myo6	V9GXM4	Unconventional myosin-VI	-0.172665	14.7867	0.0404599	0.206957	-2.3526	-4.20641
Kid. Medulla	Mouse	Osbpl6	Osbpl6	V9GXX3	Oxysterol-binding protein (Fragment)	0.131514	7.75761	0.6656	0.821792	0.445282	-6.46503
Kid. Medulla	Mouse	Aadacl2fm2	Aadacl2fm2	W4VSP6	AADACL2 family member 2	-0.0575408	14.5588	0.883838	0.941523	-0.149882	-6.55881
Kid. Medulla	Mouse	Gnas	Gnas	Z4YKV1	GNAS (guanine nucleotide binding protein, alpha stimulating) complex locus	-0.735789	10.6784	0.0261831	0.165563	-2.6068	-3.79042
Kid. Medulla	Mouse	Csdc2	Csdc2	A0A2R8VHB0;D3YTN0;Q91YQ3	Cold shock domain containing C2, RNA binding (Fragment);Cold shock domain containing C2, RNA binding (Fragment);Cold shock domain-containing protein C2	0.521782	8.64178	0.108616	0.33095	1.83828	-4.88215
Kid. Medulla	Mouse	Septin3	Septin3	A0A2R8VHB2;A0A2R8W6V9;A0A571BE69;A0A5F8MPL6;Q9Z1S5	Septin 3 (Fragment);Septin 3;Septin 3;Septin 3;Neuronal-specific septin-3		8.59923
Kid. Medulla	Mouse	Epb41l1	Epb41l1	A0A2R8VHB6	Erythrocyte membrane protein band 4.1 like 1 (Fragment)	0.849092	8.8125	0.24622	0.501479	1.24031	-5.7619
Kid. Medulla	Mouse	Naga	Naga	A0A2R8VHC0	Alpha-galactosidase (Fragment)	0.488557	13.5911	0.0125554	0.120058	3.03562	-3.07538
Kid. Medulla	Mouse	Nup155	Nup155	A0A2R8VHH1;Q99P88	Nucleoporin 155;Nuclear pore complex protein Nup155	-0.0146831	11.8885	0.825559	0.909842	-0.226257	-6.54337
Kid. Medulla	Mouse	Pcbp2	Pcbp2	A0A2R8VHL8	Poly(rC) binding protein 2 (Fragment)	0.286138	10.1996	0.0773831	0.279572	1.96813	-4.81103
Kid. Medulla	Mouse	Tns2	Tns2	A0A2R8VHQ0;Q8CGB6	Tensin 2;Tensin-2	-0.0837853	12.9114	0.296927	0.556909	-1.10043	-5.95503
Kid. Medulla	Mouse	Stat1	Stat1	A0A087WSP5;Q8C3V4	Signal transducer and activator of transcription	0.57277	12.677	0.000283131	0.0198774	5.44416	0.699182
Kid. Medulla	Mouse	Krt80	Krt80	A0A2R8VHR6;Q0VBK2	Keratin 80;Keratin, type II cytoskeletal 80	-0.378147	10.4741	0.354961	0.608216	-0.969917	-6.08636
Kid. Medulla	Mouse	Slc48a1	Slc48a1	A0A2R8VHT5;Q9D8M3	Solute carrier family 48 (heme transporter), member 1 (Fragment);Heme transporter HRG1	0.169935	8.31565	0.610683	0.786963	0.529725	-6.2989
Kid. Medulla	Mouse	Phf20l1	Phf20l1	A0A2R8VHV1;A0A5S8DHC4;Q8CCJ9	PHD finger protein 20-like protein 1	0.167398	8.56477	0.0348839	0.192864	2.4394	-4.06543
Kid. Medulla	Mouse	Brd4	Brd4	A0A2R8VHW4	Bromodomain containing 4 (Fragment)	0.0673665	7.25137	0.771015	0.881038	0.304522	-6.23282
Kid. Medulla	Mouse	Ndufa6	Ndufa6	A0A2R8VHX1	NADH:ubiquinone oxidoreductase subunit A6 (Fragment)	-0.270377	12.0015	0.0486017	0.225705	-2.24485	-4.37947
Kid. Medulla	Mouse	Zfp385a	Zfp385a;Znf385a	A0A2R8VHX5;Q8VD12	Zinc finger protein 385A	0.174062	8.31609	0.694469	0.839034	0.407299	-6.39146
Kid. Medulla	Mouse	Dnal4	Dnal4	A0A2R8VI05;A0A2R8W6G8;Q8CDT8;Q9DCM4	Dynein, axonemal, light chain 4;Dynein, axonemal, light chain 4 (Fragment);Dynein light chain;Dynein axonemal light chain 4	0.121174	10.658	0.388082	0.634773	0.902362	-6.14898
Kid. Medulla	Mouse	Cd47	Cd47	A0A2R8VI30;A0A2R8VK70;Q61735	Leukocyte surface antigen CD47	-0.0111885	12.9536	0.903006	0.95118	-0.124992	-6.5625
Kid. Medulla	Mouse	Tfap4	Tfap4	A0A2R8VI80;A0A2R8W6R9;Q9JIZ5	Transcription factor AP4 (Fragment);Transcription factor AP4 (Fragment);Activator protein 4	0.650775	6.80984	0.468163	0.691364	0.800694	-5.66195
Kid. Medulla	Mouse	Cd47	Cd47	A0A2R8VI94	CD47 antigen (Rh-related antigen, integrin-associated signal transducer)	0.368596	10.2438	0.49488	0.711534	0.708395	-6.30692
Kid. Medulla	Mouse	Ndufs1	Ndufs1	A0A087WSU3	NADH:ubiquinone oxidoreductase core subunit S1 (Fragment)	-0.0714769	11.4635	0.709087	0.847016	-0.383902	-6.49201
Kid. Medulla	Mouse	Aco2	Aco2	A0A2R8VJW0	Aconitase 2, mitochondrial (Fragment)	-0.243026	13.3134	0.160963	0.406172	-1.51403	-5.45997
Kid. Medulla	Mouse	Cela1	Cela1	A0A2R8VK43;Q91X79	Chymotrypsin-like elastase family, member 1 (Fragment);Chymotrypsin-like elastase family member 1	0.374019	7.86839	0.21743	0.473076	1.32623	-5.66088
Kid. Medulla	Mouse	Rcan2	Rcan2	A0A2R8VKI0;Q9JHG2	Regulator of calcineurin 2 (Fragment);Calcipressin-2	-1.02916	7.0617	0.305516	0.566807	-1.09468	-5.83853
Kid. Medulla	Mouse	Tfcp2	Tfcp2	A0A2R8VKI7;Q9ERA0	Transcription factor CP2;Alpha-globin transcription factor CP2	0.111623	9.60381	0.293423	0.552068	1.10891	-5.94604
Kid. Medulla	Mouse	Mzt2	Mzt2	A0A2R8VKN7;Q9CQ25	Mitotic spindle organizing protein 2;Mitotic-spindle organizing protein 2	-0.200658	9.67543	0.0526328	0.236099	-2.23073	-4.38954
Kid. Medulla	Mouse	Gm49510	Gm49510	A0A2R8W6I7	Predicted gene, 49510	0.668341	8.16449	0.172659	0.419471	1.48132	-5.46751
Kid. Medulla	Mouse	Gm49496	Gm49496;Gpbp1;Gpbp1	A0A2R8W6M1;D6RCY3;Q6NXH3	Predicted gene, 49496 (Fragment);GC-rich promoter binding protein 1;Vasculin	0.234842	8.43769	0.305916	0.567023	1.0855	-5.93158
Kid. Medulla	Mouse	Pacsin2	Pacsin2	A0A2R8W6S4	Protein kinase C and casein kinase substrate in neurons 2 (Fragment)	-0.366082	8.97958	0.380847	0.628342	-0.916756	-6.13595
Kid. Medulla	Mouse	Wnt7b	Wnt7b	A0A2U3TZ52;E9Q5E3;P28047;Q6NZR1	Protein Wnt;Protein Wnt;Protein Wnt-7b;Protein Wnt		7.41992
Kid. Medulla	Mouse	Polr2f	Polr2f	A0A2U3TZ54;P61219	Polymerase (RNA) II (DNA directed) polypeptide F;DNA-directed RNA polymerases I, II, and III subunit RPABC2	-0.132803	11.7536	0.292757	0.551497	-1.11053	-5.94431
Kid. Medulla	Mouse	Nab1	Nab1	A0A087WSU4;E9PZ64;Q61122	Ngfi-A binding protein 1;Ngfi-A binding protein 1;NGFI-A-binding protein 1	0.29968	8.52834	0.24382	0.499931	1.23848	-5.80226
Kid. Medulla	Mouse	Slc39a4	Slc39a4	A0A2U3TZ56;Q78IQ7	Solute carrier family 39 (zinc transporter), member 4;Zinc transporter ZIP4	0.0800018	7.78586	0.840031	0.917944	0.212604	-6.20789
Kid. Medulla	Mouse	Triobp	Triobp	A0A2U3TZ82;Q99KW3	TRIO and F-actin binding protein;TRIO and F-actin-binding protein	0.218378	12.3699	0.0374338	0.199323	2.39813	-4.13261
Kid. Medulla	Mouse	Rab44	Rab44	A0A2Y9CZI3;A0A3B2WDC9;Q8CB87	RAB44, member RAS oncogene family;RAB44, member RAS oncogene family (Fragment);Ras-related protein Rab-44	0.0705648	12.5505	0.671591	0.825454	0.436723	-6.46902
Kid. Medulla	Mouse	Clcn2	Clcn2	A0A338P673;Q9R0A1	Chloride channel protein 2	0.0383592	9.36031	0.765746	0.878829	0.306182	-6.52059
Kid. Medulla	Mouse	Smpd4	Smpd4	A0A338P695	Sphingomyelin phosphodiesterase 4	0.24941	9.15356	0.469427	0.691921	0.755205	-6.23255
Kid. Medulla	Mouse	Yeats2	Yeats2	A0A338P697;Q3TUF7	YEATS domain containing 2 (Fragment);YEATS domain-containing protein 2	-0.203838	10.0019	0.21682	0.472449	-1.31823	-5.70803
Kid. Medulla	Mouse	Polr2h	Polr2h	A0A338P6B4;A0A338P6I2;Q923G2	Polymerase (RNA) II (DNA directed) polypeptide H (Fragment);DNA-directed RNA polymerases I, II, and III subunit RPABC3;DNA-directed RNA polymerases I, II, and III subunit RPABC3	0.110639	10.3529	0.53961	0.74414	0.635119	-6.35768
Kid. Medulla	Mouse	Synj1	Synj1	A0A338P6C7	Synaptojanin 1 (Fragment)	0.214701	11.2375	0.46056	0.686985	0.767431	-6.2624
Kid. Medulla	Mouse	Heg1	Heg1	A0A338P6D4;E9Q440;E9Q7X6	Heart development protein with EGF-like domains 1;Heart development protein with EGF-like domains 1;Protein HEG homolog 1	-0.104868	9.55133	0.490411	0.708049	-0.715935	-6.30141
Kid. Medulla	Mouse	Dlg4	Dlg4	A0A338P6E5;A0A338P6I6;G3UZL5;Q62108	Discs large MAGUK scaffold protein 4;Discs large MAGUK scaffold protein 4;Discs large MAGUK scaffold protein 4;Disks large homolog 4	0.869062	6.83039	0.0134736	0.122999	3.15607	-2.96922
Kid. Medulla	Mouse	Iqcj-Schip1	Iqcj-Schip1;Schip1;Schip1	A0A088MLT8;A0A0A6YXQ5;P0DPB4	IQCJ-SCHIP1 readthrough transcript protein;Schwannomin interacting protein 1 (Fragment);Schwannomin-interacting protein 1	-0.487521	8.01329	0.160435	0.405539	-1.52974	-5.40448
[truncated: 9,919 more rows]

## Sheet: Liver
Group	Organism	Gene	Genes	Uniprot_IDs	Protein_Description	log2FC	Average_Expression	P_Value	Adjusted_P_Value	t	B
[truncated: 9,078 more rows]

## Sheet: Heart
Group	Organism	Gene	Genes	Uniprot_IDs	Protein_Description	log2FC	Average_Expression	P_Value	Adjusted_P_Value	t	B
[truncated: 6,946 more rows]

[truncated: 11 more sheets: Lung, Spleen, Brain, Ileum, Jejunum, Duodenum, Colon, Erythrocytes, Muscle, Plasma, Urine]
