# Supplementary material for: Diversion of Arginine’s dietary metabolic fate in proteinuric kidney disease
Source: Research Square preprint supplement (doi:10.21203/rs.3.rs-9927381/v1), 2026-06-17
Supplement: Supplementary file 24 [file d5d6ef4c6ccc50c09eec404b.xlsx]

## Sheet: Cortex
Organ	PG.Genes	PG.ProteinNames	PG.UniProtIds	Control_AD_1__PG.NrOfStrippedSequencesUsedForQuantification	Control_AD_2__PG.NrOfStrippedSequencesUsedForQuantification	Control_AD_3__PG.NrOfStrippedSequencesUsedForQuantification	Control_AD_4__PG.NrOfStrippedSequencesUsedForQuantification	Control_AD_5__PG.NrOfStrippedSequencesUsedForQuantification	Control_ND_1__PG.NrOfStrippedSequencesUsedForQuantification	Control_ND_2__PG.NrOfStrippedSequencesUsedForQuantification	Control_ND_3__PG.NrOfStrippedSequencesUsedForQuantification	Control_ND_4__PG.NrOfStrippedSequencesUsedForQuantification	Control_ND_5__PG.NrOfStrippedSequencesUsedForQuantification	Proteinuric_AD_1__PG.NrOfStrippedSequencesUsedForQuantification	Proteinuric_AD_2__PG.NrOfStrippedSequencesUsedForQuantification	Proteinuric_AD_3__PG.NrOfStrippedSequencesUsedForQuantification	Proteinuric_AD_4__PG.NrOfStrippedSequencesUsedForQuantification	Proteinuric_AD_5__PG.NrOfStrippedSequencesUsedForQuantification	Proteinuric_ND_1__PG.NrOfStrippedSequencesUsedForQuantification	Proteinuric_ND_2__PG.NrOfStrippedSequencesUsedForQuantification	Proteinuric_ND_3__PG.NrOfStrippedSequencesUsedForQuantification	Proteinuric_ND_4__PG.NrOfStrippedSequencesUsedForQuantification	Control_AD_1__PG.Coverage	Control_AD_2__PG.Coverage	Control_AD_3__PG.Coverage	Control_AD_4__PG.Coverage	Control_AD_5__PG.Coverage	Control_ND_1__PG.Coverage	Control_ND_2__PG.Coverage	Control_ND_3__PG.Coverage	Control_ND_4__PG.Coverage	Control_ND_5__PG.Coverage	Proteinuric_AD_1__PG.Coverage	Proteinuric_AD_2__PG.Coverage	Proteinuric_AD_3__PG.Coverage	Proteinuric_AD_4__PG.Coverage	Proteinuric_AD_5__PG.Coverage	Proteinuric_ND_1__PG.Coverage	Proteinuric_ND_2__PG.Coverage	Proteinuric_ND_3__PG.Coverage	Proteinuric_ND_4__PG.Coverage	Control_AD_1__PG.Pvalue	Control_AD_2__PG.Pvalue	Control_AD_3__PG.Pvalue	Control_AD_4__PG.Pvalue	Control_AD_5__PG.Pvalue	Control_ND_1__PG.Pvalue	Control_ND_2__PG.Pvalue	Control_ND_3__PG.Pvalue
Kid. Cortex	Col12a1	COCA1_MOUSE	Q60847	54	44	55	60	53	57	79	71	74	74	83	106	98	97	99	100	94	95	101	24.3%	22%	24.3%	26.5%	23%	26.3%	33.6%	29.9%	32%	30.7%	35.4%	43%	40.4%	39.5%	40.3%	40.4%	37.6%	38.7%	40%	2.35127e-05	2.35127e-05	2.35127e-05	2.35127e-05	2.35127e-05	2.35127e-05	2.35127e-05	2.35127e-05
Kid. Cortex	Col14a1	B7ZNH7_MOUSE	B7ZNH7	49	43	47	48	48	49	53	53	53	51	49	54	51	54	52	54	52	52	55	35.6%	29.4%	34.2%	36.2%	32.8%	35.1%	38.4%	39.1%	38.6%	36.9%	37.2%	39.9%	39.2%	38.1%	38.2%	40.4%	39.3%	37.8%	40.2%	5.58687e-05	5.58687e-05	5.58687e-05	5.58687e-05	5.58687e-05	5.58687e-05	5.58687e-05	5.58687e-05
Kid. Cortex	Col15a1	A2AJY2_MOUSE;COFA1_MOUSE	A2AJY2;O35206	15	15	17	15	17	17	17	18	16	18	16	17	17	17	17	18	18	17	18	13.4%;13.2%	14.4%;14.2%	17.1%;16.8%	13.4%;13.2%	17.1%;16.8%	17%;16.8%	17.1%;16.8%	18.4%;18.1%	15.7%;15.4%	18.4%;18.1%	14.8%;14.6%	17.1%;16.8%	17.1%;16.8%	17.1%;16.8%	17.1%;16.8%	18.4%;18.1%	18.4%;18.1%	17.1%;16.8%	18.4%;18.1%	4.17134e-05	4.17134e-05	4.17134e-05	4.17134e-05	4.17134e-05	4.17134e-05	4.17134e-05	4.17134e-05
Kid. Cortex	Col16a1	A3KFV7_MOUSE;COGA1_MOUSE	A3KFV7;Q8BLX7	1	1	1	1			1	1				1		1	1	1			1	0.5%;0.4%	0.5%;0.4%	0.5%;0.4%	0.5%;0.4%			0.5%;0.4%	0.5%;0.4%				0.5%;0.4%		0.5%;0.4%	0.5%;0.4%	0.5%;0.4%			0.5%;0.4%	0.000753693	0.000753693	0.000753693	0.000753693			0.000753693	0.000753693
Kid. Cortex	Col18a1	E9QPX1_MOUSE;COIA1_MOUSE	E9QPX1;P39061	24	20	22	22	23	23	26	26	25	23	25	24	25	26	26	27	26	26	28	17.4%;17.4%	15.3%;15.3%	16.5%;16.5%	16%;16%	17.1%;17.1%	15.8%;15.8%	18.7%;18.7%	18.4%;18.4%	17.1%;17.1%	16.1%;16.1%	18.7%;18.7%	18.3%;18.3%	18.7%;18.7%	18.7%;18.7%	18.4%;18.4%	19.3%;19.3%	18.7%;18.7%	18.7%;18.7%	19.4%;19.4%	4.49694e-05	4.49694e-05	4.49694e-05	4.49694e-05	4.49694e-05	4.49694e-05	4.49694e-05	4.49694e-05
Kid. Cortex	Col1a1	CO1A1_MOUSE	P11087	17	15	13	16	9	10	21	23	14	18	18	18	16	13	18	19	22	18	24	17.7%	13%	12.7%	15.9%	7%	9.8%	20.6%	21.3%	14%	17.7%	17.5%	17.4%	14.5%	10.9%	17.1%	17.8%	20.6%	17.3%	22.6%	5.86316e-05	5.86316e-05	5.86316e-05	5.86316e-05	5.86316e-05	5.86316e-05	5.86316e-05	5.86316e-05
Kid. Cortex	Col1a2	CO1A2_MOUSE	Q01149	17	16	16	19	16	16	18	20	18	18	20	20	17	15	20	18	20	20	20	18.5%	17.3%	16.3%	20.6%	16.8%	18.9%	20.3%	21.6%	19.4%	19.9%	21.6%	21.6%	17.6%	16.5%	21.6%	18.3%	21.6%	21.6%	21.6%	5.61292e-05	5.61292e-05	5.61292e-05	5.61292e-05	5.61292e-05	5.61292e-05	5.61292e-05	5.61292e-05
Kid. Cortex	Col26a1	COQA1_MOUSE	Q91VF6	1		2		2						2	1		2		1	1	1	2	2.7%		5.7%		5.7%						5.7%	3%		5.7%		3%	3%	3%	5.7%	0.00118655		0.00118655		0.00118655
Kid. Cortex	Col2a1	CO2A1_MOUSE	P28481	1		1	1	1	1	1	1	1	1	1	1	1	1	1	1	1	1	1	1.1%		1.1%	1.1%	1.1%	1.1%	1.1%	1.1%	1.1%	1.1%	1.1%	1.1%	1.1%	1.1%	1.1%	1.1%	1.1%	1.1%	1.1%	8.28887e-05		8.28887e-05	8.28887e-05	8.28887e-05	8.28887e-05	8.28887e-05	8.28887e-05
Kid. Cortex	Col3a1	CO3A1_MOUSE	P08121	4	4	4	4		2	5	4	4	5	5	4	3	2	4	4	5	5	3	1.4%	1.4%	3.1%	1.4%		1.2%	2.7%	1.4%	1.4%	2.7%	4.1%	2.1%	1.9%	1.6%	2.1%	2.1%	2.2%	2.1%	1.4%	8.18781e-05	8.18781e-05	8.18781e-05	8.18781e-05		8.18781e-05	8.18781e-05	8.18781e-05
Kid. Cortex	Col4a1	CO4A1_MOUSE	P02463	8	9	11	10	5	7	11	12	9	11	8	9	9	8	11	11	10	10	10	7%	8.1%	8.9%	8.2%	4.3%	5.8%	10.2%	10.8%	8.1%	8.9%	5.9%	7.7%	7.7%	7%	8.9%	10.8%	8.8%	8.8%	8.8%	4.45446e-05	4.45446e-05	4.45446e-05	4.45446e-05	4.45446e-05	4.45446e-05	4.45446e-05	4.45446e-05
Kid. Cortex	Col4a2	CO4A2_MOUSE	P08122	18	19	17	17	11	17	19	19	17	20	16	20	19	18	20	19	20	17	21	15.3%	15.3%	14.4%	15.1%	10%	15.1%	16.4%	15.5%	14.4%	16.4%	14.4%	16.4%	16.2%	14.9%	16.4%	16.2%	16.4%	15.1%	16.6%	7.17773e-05	7.17773e-05	7.17773e-05	7.17773e-05	7.17773e-05	7.17773e-05	7.17773e-05	7.17773e-05
Kid. Cortex	Col4a3	CO4A3_MOUSE	Q9QZS0	5	6	4	5	2	3	6	6	5	5	3	6	3	3	5	5	5	5	5	5.5%	7.2%	4.3%	5.5%	1.9%	2.5%	7%	7%	5.8%	5.5%	2.5%	7%	2.5%	2.5%	5.5%	5.8%	5.5%	5.5%	5.5%	8.06308e-05	8.06308e-05	8.06308e-05	8.06308e-05	8.06308e-05	8.06308e-05	8.06308e-05	8.06308e-05
Kid. Cortex	Col4a4	CO4A4_MOUSE	Q9QZR9	5	4	4	5	4	4	4	4	4	4	4	4	3	3	5	4	4	4	4	4%	3.4%	3.4%	4%	3.3%	3.4%	3.4%	3.4%	3.4%	3.4%	3.3%	3.4%	2.7%	2.7%	4%	3.4%	3.4%	3.4%	3.4%	8.40558e-05	8.40558e-05	8.40558e-05	8.40558e-05	8.40558e-05	8.40558e-05	8.40558e-05	8.40558e-05
Kid. Cortex	Col4a5	F7CK55_MOUSE;Q63ZW6_MOUSE	F7CK55;Q63ZW6	6	4	4	4	3	4	5	5	4	6	3	4	4	4	5	4	4	5	4	9.8%;4.6%	5.8%;2.7%	5.4%;2.5%	5.4%;2.5%	3.9%;1.8%	5.4%;2.5%	7.2%;3.4%	7.2%;3.4%	5.4%;2.5%	9.8%;4.6%	3.9%;1.8%	5.4%;2.5%	5.4%;2.5%	5.4%;2.5%	7.2%;3.4%	5.4%;2.5%	5.4%;2.5%	7.2%;3.4%	5.4%;2.5%	7.52112e-05	7.52112e-05	7.52112e-05	7.52112e-05	7.52112e-05	7.52112e-05	7.52112e-05	7.52112e-05
Kid. Cortex	Col4a6	B1AVK5_MOUSE	B1AVK5	2	2	1	1		2	2	2	2	2		2	2		2	2	2	2	2	2.1%	2.1%	0.5%	0.5%		2.1%	2.1%	2.1%	2.1%	2.1%		2.1%	2.1%		2.1%	2.1%	2.1%	2.1%	2.1%	0.000763012	0.000763012	0.000763012	0.000763012		0.000763012	0.000763012	0.000763012
Kid. Cortex	Col5a1	CO5A1_MOUSE	O88207	4	3	6	5	7	6	7	7	6	6	7	9	6	8	8	7	8	9	9	4.2%	3.3%	5.4%	4.9%	7%	5.2%	5.4%	5.9%	6.4%	5.4%	7%	7.6%	5.4%	7.6%	5.9%	5.9%	5.9%	7.6%	7.6%	6.44268e-05	6.44268e-05	6.44268e-05	6.44268e-05	6.44268e-05	6.44268e-05	6.44268e-05	6.44268e-05
Kid. Cortex	Col5a2	CO5A2_MOUSE	Q3U962	2	1	2	2	2	1	2	2	3	3	3	3	3	3	3	3	3	3	3	1.9%	0.6%	1.9%	1.9%	1.6%	0.6%	1.9%	1.9%	2.9%	2.9%	2.9%	2.9%	2.9%	2.9%	2.9%	2.9%	2.9%	2.9%	2.9%	0.000187193	0.000187193	0.000187193	0.000187193	0.000187193	0.000187193	0.000187193	0.000187193
Kid. Cortex	Col5a3	Q9JLI2_MOUSE	Q9JLI2	1	1		1			1	1	1	1	1	1	1	1	1	1	1	1	1	0.6%	0.6%		0.6%			0.6%	0.6%	0.6%	0.6%	0.6%	0.6%	0.6%	0.6%	0.6%	0.6%	0.6%	0.6%	0.6%	0.000177855	0.000177855		0.000177855			0.000177855	0.000177855
Kid. Cortex	Col6a1	CO6A1_MOUSE	Q04857	32	28	32	29	28	28	31	33	29	28	24	33	27	28	31	30	30	28	33	35.8%	29.3%	35.6%	32.2%	31.6%	30%	36.5%	34.5%	31.4%	28.3%	28.8%	36%	33.2%	32.1%	35.3%	35.5%	34.4%	33.5%	34.8%	5.89919e-05	5.89919e-05	5.89919e-05	5.89919e-05	5.89919e-05	5.89919e-05	5.89919e-05	5.89919e-05
Kid. Cortex	Col6a2	CO6A2_MOUSE	Q02788	22	24	19	21	23	18	21	20	24	21	21	23	20	22	22	20	21	22	22	25%	24.8%	24%	24.6%	26%	19.7%	24.3%	22.7%	28.5%	24.5%	26.2%	27.8%	25%	26%	26.7%	23.8%	24.6%	26.7%	25%	5.80889e-05	5.80889e-05	5.80889e-05	5.80889e-05	5.80889e-05	5.80889e-05	5.80889e-05	5.80889e-05
Kid. Cortex	Col6a3	E9PWQ3_MOUSE	E9PWQ3	113	110	110	110	108	106	114	119	117	119	106	113	112	116	119	113	117	119	117	43.5%	39.8%	43.2%	43.5%	42.8%	41.8%	44.4%	43.2%	45%	44.5%	41.2%	44.1%	42.7%	44.8%	44.7%	43.9%	45.1%	45%	43.9%	4.68961e-05	4.68961e-05	4.68961e-05	4.68961e-05	4.68961e-05	4.68961e-05	4.68961e-05	4.68961e-05
Kid. Cortex	Col6a4	CO6A4_MOUSE	A2AX52	2		2	2	2	1	2	1	3	2	2	2	3	3	3	2	2	3	3	0.6%		0.6%	0.6%	0.6%	0.3%	0.6%	0.3%	1.1%	0.6%	0.8%	0.7%	1.1%	1.1%	1.1%	0.7%	0.7%	1.1%	1.1%	0.000410534		0.000410534	0.000410534	0.000410534	0.000410534	0.000410534	0.000410534
Kid. Cortex	Col6a5	A0A140T8T7_MOUSE;A0A140T8W1_MOUSE;CO6A5_MOUSE	A0A140T8T7;A0A140T8W1;A6H584	9	7	7	7	11	8	8	9	9	10	9	11	10	10	13	11	8	11	9	5.3%;5.3%;5.3%	3.9%;3.9%;3.9%	3.8%;3.8%;3.8%	3.7%;3.7%;3.7%	6.4%;6.4%;6.4%	4.7%;4.7%;4.7%	4.6%;4.6%;4.6%	4.6%;4.6%;4.6%	5.3%;5.3%;5.3%	5.3%;5.3%;5.3%	4.7%;4.7%;4.7%	6.4%;6.4%;6.4%	5.5%;5.5%;5.5%	5.9%;5.9%;5.9%	7.2%;7.2%;7.2%	6.8%;6.8%;6.8%	4.5%;4.5%;4.5%	6.4%;6.4%;6.4%	5.5%;5.5%;5.5%	6.729e-05	6.729e-05	6.729e-05	6.729e-05	6.729e-05	6.729e-05	6.729e-05	6.729e-05
Kid. Cortex	Col6a6	E9Q6A6_MOUSE;CO6A6_MOUSE	E9Q6A6;Q8C6K9	2	1	2	4	3	3	2	4	3	2	3	2	3	3	4	4	3	4	4	1.1%;1.1%	0.4%;0.4%	0.8%;0.8%	2.2%;2.2%	2.3%;2.3%	1.5%;1.5%	1.1%;1.1%	3%;3%	1.5%;1.5%	1.1%;1.1%	1.8%;1.8%	1.1%;1.1%	2.6%;2.6%	1.9%;1.9%	2.8%;2.8%	3%;3%	1.5%;1.5%	2.2%;2.2%	2.8%;2.8%	8.61012e-05	8.61012e-05	8.61012e-05	8.61012e-05	8.61012e-05	8.61012e-05	8.61012e-05	8.61012e-05
Kid. Cortex	Col8a1	CO8A1_MOUSE	Q00780	1	1		1			2	1		2	2	2	2	1	2	2	2	2	2	1.3%	1.3%		1.3%			5%	1.3%		5%	5%	5%	5%	1.3%	5%	5%	5%	5%	5%	0.000103244	0.000103244		0.000103244			0.000103244	0.000103244
[truncated: 182 more columns]

## Sheet: Medulla
Organ	PG.Genes	PG.ProteinNames	PG.UniProtIds	Control_AD_1__PG.NrOfStrippedSequencesUsedForQuantification	Control_AD_2__PG.NrOfStrippedSequencesUsedForQuantification	Control_AD_3__PG.NrOfStrippedSequencesUsedForQuantification	Control_AD_4__PG.NrOfStrippedSequencesUsedForQuantification	Control_AD_5__PG.NrOfStrippedSequencesUsedForQuantification	Control_AD_6__PG.NrOfStrippedSequencesUsedForQuantification	Control_ND_1__PG.NrOfStrippedSequencesUsedForQuantification	Control_ND_2__PG.NrOfStrippedSequencesUsedForQuantification	Control_ND_3__PG.NrOfStrippedSequencesUsedForQuantification	Control_ND_4__PG.NrOfStrippedSequencesUsedForQuantification	Control_ND_5__PG.NrOfStrippedSequencesUsedForQuantification	Control_ND_6__PG.NrOfStrippedSequencesUsedForQuantification	Proteinuric_AD_1__PG.NrOfStrippedSequencesUsedForQuantification	Proteinuric_AD_2__PG.NrOfStrippedSequencesUsedForQuantification	Proteinuric_AD_3__PG.NrOfStrippedSequencesUsedForQuantification	Proteinuric_AD_4__PG.NrOfStrippedSequencesUsedForQuantification	Proteinuric_AD_5__PG.NrOfStrippedSequencesUsedForQuantification	Proteinuric_ND_1__PG.NrOfStrippedSequencesUsedForQuantification	Proteinuric_ND_2__PG.NrOfStrippedSequencesUsedForQuantification	Proteinuric_ND_3__PG.NrOfStrippedSequencesUsedForQuantification	Proteinuric_ND_4__PG.NrOfStrippedSequencesUsedForQuantification	Control_AD_1__PG.Coverage	Control_AD_2__PG.Coverage	Control_AD_3__PG.Coverage	Control_AD_4__PG.Coverage	Control_AD_5__PG.Coverage	Control_AD_6__PG.Coverage	Control_ND_1__PG.Coverage	Control_ND_2__PG.Coverage	Control_ND_3__PG.Coverage	Control_ND_4__PG.Coverage	Control_ND_5__PG.Coverage	Control_ND_6__PG.Coverage	Proteinuric_AD_1__PG.Coverage	Proteinuric_AD_2__PG.Coverage	Proteinuric_AD_3__PG.Coverage	Proteinuric_AD_4__PG.Coverage	Proteinuric_AD_5__PG.Coverage	Proteinuric_ND_1__PG.Coverage	Proteinuric_ND_2__PG.Coverage	Proteinuric_ND_3__PG.Coverage	Proteinuric_ND_4__PG.Coverage	Control_AD_1__PG.Pvalue	Control_AD_2__PG.Pvalue	Control_AD_3__PG.Pvalue	Control_AD_4__PG.Pvalue
Kid. Medulla	Col12a1	E9PX70_MOUSE;COCA1_MOUSE	E9PX70;Q60847	80	88	66	86	79	95	91	101	98	100	102	96	96	103	105	96	103	99	94	105	103	34.8%;34.2%	37.7%;37.1%	28.7%;28.2%	35.7%;35.1%	34.2%;33.6%	38.2%;37.5%	37.5%;36.8%	40.8%;40.1%	39.6%;38.9%	41.4%;40.7%	40.6%;39.8%	39.3%;38.6%	40.7%;40%	42.5%;41.7%	42.9%;42.1%	38.9%;38.2%	42.5%;41.7%	41.3%;40.6%	37.2%;36.5%	42.8%;42%	41.9%;41.2%	9.05811e-20	9.05811e-20	9.05811e-20	9.05811e-20
Kid. Medulla	Col13a1	D3Z7B8_MOUSE;D3Z7B9_MOUSE;F6Y6J7_MOUSE;CODA1_MOUSE	D3Z7B8;D3Z7B9;F6Y6J7;Q9R1N9	1	1	1	1			1	1	1	1	1	1	1	1			1	1				1.8%;1.7%;4.9%;1.6%	1.8%;1.7%;4.9%;1.6%	1.8%;1.7%;4.9%;1.6%	1.8%;1.7%;4.9%;1.6%			1.8%;1.7%;4.9%;1.6%	1.8%;1.7%;4.9%;1.6%	1.8%;1.7%;4.9%;1.6%	1.8%;1.7%;4.9%;1.6%	1.8%;1.7%;4.9%;1.6%	1.8%;1.7%;4.9%;1.6%	1.8%;1.7%;4.9%;1.6%	1.8%;1.7%;4.9%;1.6%			1.8%;1.7%;4.9%;1.6%	1.8%;1.7%;4.9%;1.6%				0.00283048	0.00283048	0.00283048	0.00283048
Kid. Medulla	Col14a1	B7ZNH7_MOUSE	B7ZNH7	56	56	50	56	57	59	58	58	62	58	59	59	57	64	61	60	63	64	62	61	63	40.1%	40%	37.2%	43.4%	44%	44.1%	43%	42.5%	45.8%	43%	44.8%	45.7%	45.2%	48.8%	47%	45.6%	47.6%	48.4%	46.5%	46.3%	48%	4.31258e-16	4.31258e-16	4.31258e-16	4.31258e-16
Kid. Medulla	Col15a1	A2AJY2_MOUSE;COFA1_MOUSE	A2AJY2;O35206	15	17	17	18	19	18	18	19	17	20	18	18	19	18	19	18	18	19	17	18	18	14.9%;14.7%	17.1%;16.8%	16.8%;16.5%	18.1%;17.8%	18.7%;18.4%	18.1%;17.8%	18.1%;17.8%	18.7%;18.4%	16.8%;16.5%	19.9%;19.6%	18.1%;17.8%	18.1%;17.8%	18.7%;18.4%	18.1%;17.8%	18.7%;18.4%	18.1%;17.8%	18.1%;17.8%	18.7%;18.4%	17.1%;16.8%	18.1%;17.8%	18.1%;17.8%	9.3007e-19	9.3007e-19	9.3007e-19	9.3007e-19
Kid. Medulla	Col18a1	A0A1W2P6N8_MOUSE	A0A1W2P6N8	1	1		1		1	1	1	1	1	1	1		1	1	1		1	1	1	1	10.7%	10.7%		10.7%		10.7%	10.7%	10.7%	10.7%	10.7%	10.7%	10.7%		10.7%	10.7%	10.7%		10.7%	10.7%	10.7%	10.7%	7.66592e-09	7.66592e-09		7.66592e-09
Kid. Medulla	Col18a1	E9QPX1_MOUSE;COIA1_MOUSE	E9QPX1;P39061	28	28	28	26	23	28	28	29	30	30	30	26	28	31	29	31	29	30	29	29	32	19.7%;19.7%	19.6%;19.6%	21.4%;21.4%	19.3%;19.3%	15%;15%	20%;20%	21%;21%	20.9%;20.9%	20.5%;20.5%	20.9%;20.9%	22.2%;22.2%	18.1%;18.1%	21.9%;21.9%	23.8%;23.8%	21.1%;21.1%	23.3%;23.3%	23.1%;23.1%	22.3%;22.3%	20.6%;20.6%	21%;21%	23.6%;23.6%	1.45937e-15	1.45937e-15	1.45937e-15	1.45937e-15
Kid. Medulla	Col1a1	CO1A1_MOUSE	P11087	18	17	9	14	13	15	19	23	21	18	22	12	16	15	16	13	18	16	15	15	18	16.6%	15.8%	8.3%	15.8%	11.4%	13.9%	20.4%	23.5%	21.2%	18%	23.3%	10.9%	12.7%	12.8%	13.4%	12%	16.6%	14.9%	12%	14.2%	17.2%	1.21615e-20	1.21615e-20	1.21615e-20	1.21615e-20
Kid. Medulla	Col1a2	CO1A2_MOUSE	Q01149	16	20	18	21	20	20	22	27	20	21	21	23	19	18	19	20	23	16	19	20	23	19.1%	22.7%	19.5%	22.8%	20.9%	21.6%	24.1%	30.4%	23.1%	23.8%	22.3%	25.4%	20.7%	19.6%	20.7%	22.3%	25.4%	18.4%	19.4%	21%	24.3%	2.15701e-13	2.15701e-13	2.15701e-13	2.15701e-13
Kid. Medulla	Col26a1	COQA1_MOUSE	Q91VF6		1		1		1	2	2	1	2	2	1		1	1		1	1		1	1		3%		3%		3%	9.3%	9.3%	3%	9.3%	4.5%	3%		3%	3%		3%	3%		3%	3%		6.11725e-06		6.11725e-06
Kid. Medulla	Col28a1	COSA1_MOUSE	Q2UY11	2	7	2	2	3	2	3	5	6	3	4	3	5	6	4	4	5	5	3	2	6	2.3%	7.7%	1.4%	1.4%	2.5%	1.4%	2.5%	5.5%	7%	2.5%	4.4%	2.5%	5.5%	7%	4.5%	4.8%	5.2%	6%	3.3%	1.4%	7%	4.69561e-06	4.69561e-06	4.69561e-06	4.69561e-06
Kid. Medulla	Col3a1	CO3A1_MOUSE	P08121	3	7	5	7	5	8	11	13	9	9	11	10	9	9	6	8	12	6	5	8	10	2.5%	4.8%	4.7%	6.1%	3.3%	4.8%	7.5%	9.2%	5.4%	5.9%	7.9%	6.7%	7.2%	5.9%	4.1%	5.6%	7.4%	4.7%	3.8%	5.6%	6.6%	6.80786e-17	6.80786e-17	6.80786e-17	6.80786e-17
Kid. Medulla	Col4a1	CO4A1_MOUSE	P02463	10	10	9	9	10	8	13	12	12	10	10	10	6	9	8	9	8	10	9	9	10	8.1%	8.1%	7.1%	8.1%	8.2%	7%	10.9%	9.9%	9.5%	7.7%	7.7%	8.8%	5.2%	7.1%	6.8%	7.5%	7%	9%	7.8%	8%	7.5%	1.7282e-13	1.7282e-13	1.7282e-13	1.7282e-13
Kid. Medulla	Col4a2	CO4A2_MOUSE	P08122	16	16	17	16	16	15	17	18	18	18	16	18	14	15	15	14	16	17	13	15	15	14.2%	12.9%	14.2%	14%	14.2%	13.4%	15.1%	15.3%	15.3%	15.3%	14%	15.3%	12.1%	14%	12.9%	12.4%	14.2%	15.3%	11.1%	14%	13.6%	9.16663e-12	9.16663e-12	9.16663e-12	9.16663e-12
Kid. Medulla	Col4a3	CO4A3_MOUSE	Q9QZS0	5	4	5	5	4	5	7	8	7	7	7	7	3	6	4	4	4	7	4	5	6	5.5%	4.3%	4.9%	5.4%	3.8%	4.9%	6.6%	7.4%	6.1%	6.1%	6.1%	7.4%	2.4%	6.1%	4.2%	3%	4.2%	6.1%	5.1%	4.7%	5.6%	1.40398e-16	1.40398e-16	1.40398e-16	1.40398e-16
Kid. Medulla	Col4a4	CO4A4_MOUSE	Q9QZR9	4	5	5	4	6	5	7	7	7	7	6	6	1	5	2	6	4	4	3	6	4	3.5%	5.3%	5.2%	4.5%	6%	5.2%	8%	7.1%	7.1%	8%	6%	6%	1.2%	5.2%	1.8%	6.4%	3.4%	3.4%	2.6%	5.9%	3.4%	3.43713e-15	3.43713e-15	3.43713e-15	3.43713e-15
Kid. Medulla	Col4a5	F7CK55_MOUSE;Q63ZW6_MOUSE	F7CK55;Q63ZW6	3	3	3	4	5	6	6	6	4	6	5	5	2	7	3	4	3	3	4	4	4	3.9%;1.8%	3.9%;1.8%	3.9%;1.8%	6.2%;3%	7.8%;3.7%	10.2%;4.8%	10.2%;4.8%	10.2%;4.8%	6.4%;3%	9.8%;4.6%	7.8%;3.7%	7.8%;3.7%	3.9%;1.8%	12.1%;5.7%	3.9%;1.8%	6.2%;3%	3.9%;1.8%	3.9%;1.8%	5.4%;2.5%	5.4%;2.5%	5.4%;2.5%	1.88245e-13	1.88245e-13	1.88245e-13	1.88245e-13
Kid. Medulla	Col4a6	B1AVK5_MOUSE	B1AVK5	3	3	2	4	2	4	4	5	5	5	3	3	1	4	2	4	2	2	2	2	3	2.8%	2.8%	1.3%	3.4%	1.3%	3.5%	3.5%	4.1%	4.1%	4.1%	2.8%	2.8%	0.8%	3.4%	1.3%	3.5%	1.3%	1.3%	1.3%	2.1%	2.8%	3.93583e-07	3.93583e-07	3.93583e-07	3.93583e-07
Kid. Medulla	Col5a1	A0A5F8MQ70_MOUSE	A0A5F8MQ70					1			2	2	1	2		1	2	1	1	2	2	2	2	2					3.8%			11.8%	11.8%	8%	11.8%		3.8%	11.8%	3.8%	3.8%	11.8%	11.8%	11.8%	11.8%	11.8%
Kid. Medulla	Col5a1	CO5A1_MOUSE	O88207	10	11	9	11	9	13	10	12	13	12	13	11	13	13	12	14	14	11	11	13	13	7%	7.8%	6.3%	9.6%	7%	10.6%	8.6%	9.5%	10.6%	9.6%	10.6%	7.9%	10.6%	10.6%	10.1%	10.6%	10.6%	8.9%	9.1%	10.6%	10.6%	1.19543e-13	1.19543e-13	1.19543e-13	1.19543e-13
Kid. Medulla	Col5a2	CO5A2_MOUSE	Q3U962	3	3	3	3	4	3	4	3	3	4	4	4	4	2	3	4	5	3	3	4	5	2.7%	2.7%	2.7%	2.9%	3.5%	2.9%	3.7%	2.7%	2.7%	3.5%	3.5%	3.7%	3.7%	1.9%	2.9%	3.7%	4.5%	2.9%	2.7%	3.5%	4.5%	2.01078e-06	2.01078e-06	2.01078e-06	2.01078e-06
Kid. Medulla	Col5a3	Q9JLI2_MOUSE	Q9JLI2	1	2		1	2	2	1	1	1	1	1	1	1	1	1	1	1	1	1	1	1	0.6%	1.4%		0.6%	1.4%	1.4%	0.6%	0.6%	0.6%	0.6%	0.6%	0.6%	0.6%	0.6%	0.6%	0.6%	0.6%	0.6%	0.6%	0.6%	0.6%	4.8599e-07	4.8599e-07		4.8599e-07
Kid. Medulla	Col6a1	CO6A1_MOUSE	Q04857	33	33	28	29	25	34	25	33	35	32	33	29	24	30	28	29	31	28	32	32	37	33.4%	36.4%	29.4%	33.5%	29.7%	37.4%	29.9%	36%	36%	32.1%	37.5%	33.6%	31%	30.3%	32.1%	30.3%	35.3%	30.7%	34.6%	36.1%	39.4%	4.52448e-18	4.52448e-18	4.52448e-18	4.52448e-18
Kid. Medulla	Col6a2	CO6A2_MOUSE	Q02788	21	22	21	21	21	23	23	24	25	24	24	22	21	23	23	22	27	24	26	24	26	24.2%	25.1%	27.4%	27.9%	26.3%	29.7%	30%	29.1%	30.9%	29.8%	27.3%	26.4%	25.4%	29.2%	26.2%	26.1%	33%	29.6%	31.6%	31%	34.1%	4.41858e-14	4.41858e-14	4.41858e-14	4.41858e-14
Kid. Medulla	Col6a2	D3Z7D5_MOUSE	D3Z7D5	1	1		1	1	1	1	1					1			1	1			1	1	1.2%	1.2%		1.2%	1.2%	1.2%	1.2%	1.2%					1.2%			1.2%	1.2%			1.2%	1.2%	0.00111059	0.00111059		0.00111059
Kid. Medulla	Col6a3	A0A087WS16_MOUSE;J3QQ16_MOUSE	A0A087WS16;J3QQ16					1						1		1		1											0.4%;0.4%						0.4%;0.4%		0.4%;0.4%		0.4%;0.4%
Kid. Medulla	Col6a3	E9PWQ3_MOUSE	E9PWQ3	122	128	109	123	111	123	123	133	132	128	134	128	118	126	129	128	136	129	119	133	135	47.5%	48.3%	43.5%	47.7%	45%	47.8%	48.1%	50.7%	49.4%	48.5%	50.2%	49.8%	46.7%	48.8%	50.4%	49.8%	51.2%	50.6%	47.7%	50.6%	50.7%	4.13681e-19	4.13681e-19	4.13681e-19	4.13681e-19
Kid. Medulla	Col6a4	CO6A4_MOUSE	A2AX52	13	8	3	26	9	24	7	26	18	17	18	11	11	12	11	25	22	14	5	17	23	8.4%	5.7%	1.9%	16.8%	6.5%	14.5%	4.1%	15.9%	11.8%	10.7%	10.5%	6.9%	6.8%	8.1%	6.5%	15.8%	13.3%	8.7%	2.6%	10.8%	13.7%	2.13695e-12	2.13695e-12	2.13695e-12	2.13695e-12
Kid. Medulla	Col6a5	A0A140T8T7_MOUSE;A0A140T8W1_MOUSE;CO6A5_MOUSE	A0A140T8T7;A0A140T8W1;A6H584	14	30	9	41	20	13	44	31	26	13	23	45	25	22	36	16	59	32	10	25	25	7.1%;7.1%;7.1%	15.7%;15.7%;15.7%	4.9%;4.9%;4.9%	22.6%;22.6%;22.6%	10.2%;10.2%;10.2%	7.6%;7.6%;7.6%	23.8%;23.8%;23.8%	17.5%;17.5%;17.5%	13.8%;13.8%;13.8%	6.2%;6.2%;6.2%	12.5%;12.5%;12.5%	24.7%;24.7%;24.7%	14.1%;14.1%;14.1%	11.9%;11.9%;11.9%	18.1%;18.1%;18.1%	9.1%;9.1%;9.1%	27.7%;27.7%;27.7%	17.2%;17.2%;17.2%	5.6%;5.6%;5.6%	12.7%;12.7%;12.7%	14.6%;14.6%;14.6%	4.47309e-18	4.47309e-18	4.47309e-18	4.47309e-18
Kid. Medulla	Col6a6	E9Q6A6_MOUSE;CO6A6_MOUSE	E9Q6A6;Q8C6K9	17	32	7	34	22	17	38	34	35	22	27	43	19	21	26	19	47	17	9	12	22	11.4%;11.4%	21.6%;21.6%	4.3%;4.3%	20.9%;20.9%	15.1%;15.1%	11.8%;11.8%	23.5%;23.5%	22.3%;22.3%	21.6%;21.6%	13.1%;13.1%	16.6%;16.6%	28.3%;28.3%	11.1%;11.1%	13%;13%	16%;16%	11.5%;11.5%	29.3%;29.3%	10.2%;10.2%	6%;6%	7%;7%	14.7%;14.7%	3.00537e-17	3.00537e-17	3.00537e-17	3.00537e-17
Kid. Medulla	Col7a1	CO7A1_MOUSE	Q63870	5	11	2	7	4	5	3	14	8	12	9	9	5	4	6	5	8	3	2	8	12	1.6%	4.8%	0.6%	2.9%	1.6%	2.1%	0.8%	5.9%	3.4%	4.9%	3.5%	3.9%	2.1%	1.4%	2.6%	1.6%	3.2%	0.8%	0.7%	3%	4.8%	2.88465e-08	2.88465e-08	2.88465e-08	2.88465e-08
Kid. Medulla	Col8a1	CO8A1_MOUSE	Q00780				1			3	3			2	1	1	1	1	1	2	3		2	1				1.3%			6.2%	6.2%			2.6%	1.3%	1.3%	1.3%	1.3%	1.3%	5%	6.2%		2.6%	1.3%				0.00236264
[truncated: 206 more columns]
