# Supplementary material for: Diversion of Arginine’s dietary metabolic fate in proteinuric kidney disease
Source: Research Square preprint supplement (doi:10.21203/rs.3.rs-9927381/v1), 2026-06-17
Supplement: Supplementary file 25 [file daedb4d0f7bfe15722bce8d1.xlsx]

## Sheet: Top10_samples_names
peak_apex	peak_lower	peak_upper	PSMs	peak_signal	percent_also_in_unmodified	mapped_mass_1	mapped_mass_2	similarity	rt_shift	int_log2fc	localized_PSMs	n-term_localization_rate	AA1	AA1_enrichment_score	AA1_psm_count	AA2	AA2_enrichment_score	AA2_psm_count	AA3	AA3_enrichment_score	AA3_psm_count	Ctx_Ctrl_ArgDiet_138_PSMs	Ctx_Ctrl_ArgDiet_142_PSMs	Ctx_Ctrl_ArgDiet_143_PSMs	Ctx_Ctrl_NormDiet_144_PSMs	Ctx_Ctrl_NormDiet_147_PSMs	Ctx_Ctrl_NormDiet_153_PSMs	Ctx_Diseased_ArgDiet_139_PSMs	Ctx_Diseased_ArgDiet_148_PSMs	Ctx_Diseased_ArgDiet_150_PSMs	Ctx_Diseased_NormDiet_161_PSMs	Ctx_Diseased_NormDiet_166_PSMs	Ctx_Diseased_NormDiet_167_PSMs	Ctx_Healthy_ArgDiet_11_PSMs	Ctx_Healthy_ArgDiet_12_PSMs	Ctx_Healthy_ArgDiet_14_PSMs	Ctx_Healthy_NormDiet_5_PSMs	Ctx_Healthy_NormDiet_8_PSMs	Ctx_Healthy_NormDiet_9_PSMs	Med_Ctrl_ArgDiet_138_PSMs	Med_Ctrl_ArgDiet_142_PSMs	Med_Ctrl_ArgDiet_143_PSMs	Med_Ctrl_NormDiet_144_PSMs	Med_Ctrl_NormDiet_147_PSMs	Med_Ctrl_NormDiet_153_PSMs	Med_Diseased_ArgDiet_139_PSMs	Med_Diseased_ArgDiet_148_PSMs	Med_Diseased_ArgDiet_150_PSMs	Med_Diseased_NormDiet_161_PSMs
-57.0218	-57.0318	-57.0118	15426	28.32	13.66	Deletion of G		0.422	353.8	NaN	15068		C	47.8	10737							592	660	558	623	545	499	712	640	287	607	654	567	49	48	94	158	91	30	492	718	702	589	648	655	452	673	346	695
7.0104	7.0021	7.0204	12136	24.84	83.8	13C(6) 15N(1) Silac label		0.303	-4	NaN	11931		R	17.4	5859							828	1	1059	0	0	962	1056	1033	638	818	0	0	358	249	381	0	1	0	291	716	862	0	0	0	317	853	453	0
0.9998	0.9919	1.0098	12212	6.02	23.77	First isotopic peak		0.646	0.8	NaN	9663		Q	1.7	750							894	22	604	34	25	1188	694	1379	1025	833	24	29	134	177	208	15	14	19	684	426	522	21	22	28	809	1133	715	22
-116.059	-116.069	-116.049	7516	15.62	0.4	Unannotated mass-shift -116.0586		0.206	388.2	NaN	6910	7.46	C	29.6	3052							197	348	210	317	304	219	217	252	170	213	362	335	59	73	61	104	105	105	193	255	262	290	337	356	228	288	179	329
10.0074	9.9974	10.0174	6199	14.86	86.03	13C(6) 15N(4) Silac label		0.281	-8.7	NaN	6157		R	23.5	4079							414	0	435	0	0	431	319	123	34	450	0	0	81	326	146	0	0	0	477	545	724	2	0	0	308	258	111	1
-18.0106	-18.0206	-18.0006	6004	21.57	85.9	Dehydration/Pyro-glu from E		0.555	6.5	NaN	5781	29.49	T	3.6	1116	E	2.2	936	D	1.5	541	199	192	198	220	202	146	206	150	108	197	176	200	106	104	110	194	175	176	136	185	191	179	201	194	111	153	108	182
6.013	6.003	6.023	6085	10.67	88.05	13C(6) Silac label		0.474	-7.1	NaN	5411		P	6.6	2338							429	0	422	0	0	349	380	332	206	394	0	1	235	253	284	0	0	0	317	304	406	0	1	0	236	368	188	1
21.9798	21.9698	21.9898	4105	6.12	92.94	Sodium adduct		0.39	-32.3	NaN	4049		D	1.6	401	N	1.6	260				107	157	110	218	178	68	120	93	95	128	156	168	36	52	62	75	96	73	93	134	122	219	214	179	78	106	97	192
-17.027	-17.0349	-17.0173	3908	8.44	74.55	Pyro-glu from Q/Loss of ammonia		0.584	305.9	NaN	3758	55.29	Q	4.8	824	N	3.1	472	H	2.8	257	137	137	152	150	149	112	154	106	67	145	135	141	63	68	63	110	109	102	95	149	166	131	141	149	63	113	56	127
[truncated: 116 more columns]

## Sheet: Top10_groups
peak_apex	peak_lower	peak_upper	PSMs	peak_signal	percent_also_in_unmodified	mapped_mass_1	mapped_mass_2	similarity	rt_shift	int_log2fc	localized_PSMs	n-term_localization_rate	AA1	AA1_enrichment_score	AA1_psm_count	AA2	AA2_enrichment_score	AA2_psm_count	AA3	AA3_enrichment_score	AA3_psm_count	Ctx_WT_ArgDiet_1_PSMs	Ctx_WT_ArgDiet_2_PSMs	Ctx_WT_ArgDiet_3_PSMs	Ctx_Ctrl_ArgDiet_1_PSMs	Ctx_Ctrl_ArgDiet_2_PSMs	Ctx_Proteinuric_ArgDiet_1_PSMs	Ctx_Proteinuric_ArgDiet_2_PSMs	Ctx_Proteinuric_ArgDiet_3_PSMs	Ctx_WT_ControlDiet_1_PSMs	Ctx_WT_ControlDiet_2_PSMs	Ctx_WT_ControlDiet_3_PSMs	Ctx_Ctrl_ControlDiet_1_PSMs	Ctx_Ctrl_ControlDiet_2_PSMs	Ctx_Diseased_ControlDiet_1_PSMs	Ctx_Proteinuric_ControlDiet_2_PSMs	Ctx_Proteinuric_ControlDiet_3_PSMs	Ctx_Uncertain_Genotype_ArgDiet_1_PSMs	Ctx_Uncertain_Genotype_ArgDiet_2_PSMs	Med_WT_ArgDiet_1_PSMs	Med_WT_ArgDiet_2_PSMs	Med_WT_ArgDiet_3_PSMs	Med_Ctrl_ArgDiet_1_PSMs	Med_Ctrl_ArgDiet_2_PSMs	Med_Ctrl_ArgDiet_3_PSMs	Med_Proteinuric_ArgDiet_1_PSMs	Med_Proteinuric_ArgDiet_2_PSMs	Med_Proteinuric_ArgDiet_3_PSMs	Med_WT_ControlDiet_1_PSMs
-57.0218	-57.0318	-57.0118	15426	28.32	13.66	Deletion of G		0.422	353.8	NaN	15068		C	47.8	10737							49	48	94	592	558	499	640	287	158	91	30	623	545	660	654	567	712	607	75	230	134	492	718	702	452	673	346	99
7.0104	7.0021	7.0204	12136	24.84	83.8	13C(6) 15N(1) Silac label		0.303	-4	NaN	11931		R	17.4	5859							358	249	381	828	1059	962	1033	638	0	1	0	0	0	1	0	0	1056	818	270	756	233	291	716	862	317	853	453	0
0.9998	0.9919	1.0098	12212	6.02	23.77	First isotopic peak		0.646	0.8	NaN	9663		Q	1.7	750							134	177	208	894	604	1188	1379	1025	15	14	19	34	25	22	24	29	694	833	82	237	107	684	426	522	809	1133	715	14
-116.059	-116.069	-116.049	7516	15.62	0.4	Unannotated mass-shift -116.0586		0.206	388.2	NaN	6910	7.46	C	29.6	3052							59	73	61	197	210	219	252	170	104	105	105	317	304	348	362	335	217	213	70	77	68	193	255	262	228	288	179	79
10.0074	9.9974	10.0174	6199	14.86	86.03	13C(6) 15N(4) Silac label		0.281	-8.7	NaN	6157		R	23.5	4079							81	326	146	414	435	431	123	34	0	0	0	0	0	0	0	0	319	450	175	526	313	477	545	724	308	258	111	0
-18.0106	-18.0206	-18.0006	6004	21.57	85.9	Dehydration/Pyro-glu from E		0.555	6.5	NaN	5781	29.49	T	3.6	1116	E	2.2	936	D	1.5	541	106	104	110	199	198	146	150	108	194	175	176	220	202	192	176	200	206	197	110	176	114	136	185	191	111	153	108	203
6.013	6.003	6.023	6085	10.67	88.05	13C(6) Silac label		0.474	-7.1	NaN	5411		P	6.6	2338							235	253	284	429	422	349	332	206	0	0	0	0	0	0	0	1	380	394	217	491	270	317	304	406	236	368	188	0
21.9798	21.9698	21.9898	4105	6.12	92.94	Sodium adduct		0.39	-32.3	NaN	4049		D	1.6	401	N	1.6	260				36	52	62	107	110	68	93	95	75	96	73	218	178	157	156	168	120	128	36	41	42	93	134	122	78	106	97	56
-17.027	-17.0349	-17.0173	3908	8.44	74.55	Pyro-glu from Q/Loss of ammonia		0.584	305.9	NaN	3758	55.29	Q	4.8	824	N	3.1	472	H	2.8	257	63	68	63	137	152	112	106	67	110	109	102	150	149	137	135	141	154	145	51	82	45	95	149	166	63	113	56	63
	Arg Diet
	Control Diet
Ctx_Ctrl_ArgDiet_138			Ctx_Ctrl_ArgDiet_1
Ctx_Ctrl_ArgDiet_142			Ctx_Proteinuric_ControlDiet_1
Ctx_Ctrl_ArgDiet_143			Ctx_Ctrl_ArgDiet_2
Ctx_Ctrl_NormDiet_144			Ctx_Ctrl_ControlDiet_1
Ctx_Ctrl_NormDiet_147			Ctx_Ctrl_ControlDiet_2
Ctx_Ctrl_NormDiet_153			Ctx_Proteinuric_ArgDiet_1
Ctx_Diseased_ArgDiet_139			Ctx_Uncertain_Genotype_ArgDiet_1
Ctx_Diseased_ArgDiet_148			Ctx_Proteinuric_ArgDiet_2
Ctx_Diseased_ArgDiet_150			Ctx_Proteinuric_ArgDiet_3
Ctx_Diseased_NormDiet_161			Ctx_Uncertain_Genotype_ArgDiet_2
Ctx_Diseased_NormDiet_166			Ctx_Proteinuric_ControlDiet_2
Ctx_Diseased_NormDiet_167			Ctx_Proteinuric_ControlDiet_3
Ctx_Healthy_ArgDiet_11			Ctx_WT_ArgDiet_1
Ctx_Healthy_ArgDiet_12			Ctx_WT_ArgDiet_2
Ctx_Healthy_ArgDiet_14			Ctx_WT_ArgDiet_3
Ctx_Healthy_NormDiet_5			Ctx_WT_ControlDiet_1
Ctx_Healthy_NormDiet_8			Ctx_WT_ControlDiet_2
Ctx_Healthy_NormDiet_9			Ctx_WT_ControlDiet_3
Med_Ctrl_ArgDiet_138			Med_Ctrl_ArgDiet_1
Med_Ctrl_ArgDiet_142			Med_Ctrl_ArgDiet_2
Med_Ctrl_ArgDiet_143			Med_Ctrl_ArgDiet_3
Med_Ctrl_NormDiet_144			Med_Ctrl_ControlDiet_1
Med_Ctrl_NormDiet_147			Med_Ctrl_ControlDiet_2
Med_Ctrl_NormDiet_153			Med_Ctrl_ControlDiet_3
Med_Diseased_ArgDiet_139			Med_Proteinuric_ArgDiet_1
Med_Diseased_ArgDiet_148			Med_Proteinuric_ArgDiet_2
Med_Diseased_ArgDiet_150			Med_Proteinuric_ArgDiet_3
Med_Diseased_NormDiet_161			Med_Proteinuric_ControlDiet_1
Med_Diseased_NormDiet_166			Med_Proteinuric_ControlDiet_2
Med_Diseased_NormDiet_167			Med_Proteinuric_ControlDiet_3
Med_Healthy_ArgDiet_11			Med_WT_ArgDiet_1
Med_Healthy_ArgDiet_12			Med_WT_ArgDiet_2
Med_Healthy_ArgDiet_14			Med_WT_ArgDiet_3
Med_Healthy_NormDiet_5			Med_WT_ControlDiet_1
Med_Healthy_NormDiet_8			Med_WT_ControlDiet_2
Med_Healthy_NormDiet_9			Med_WT_ControlDiet_3
[truncated: 116 more columns]

## Sheet: Source data
Condition	diet	Arg7	Arg10	Pro6	Sample		Condition	diet	Arg7	Arg10	Pro6	Sample				Residue	relative enrichment
Control	Arg diet	5.456	1.235	3.582	Kid. Cortex		Control	Arg diet	358	81	235	Kid. Cortex				R7	17.4
Control	Arg diet	3.199	4.188	3.25	Kid. Cortex		Control	Arg diet	249	326	253	Kid. Cortex				R10	23.5
Control	Arg diet	4.85	1.858	3.615	Kid. Cortex		Control	Arg diet	381	146	284	Kid. Cortex				P6	6.6
Proteinuric	Arg diet	3.593	1.797	1.862	Kid. Cortex		Proteinuric	Arg diet	828	414	429	Kid. Cortex
Proteinuric	Arg diet	4.606	1.892	1.836	Kid. Cortex		Proteinuric	Arg diet	1059	435	422	Kid. Cortex
Proteinuric	Arg diet	4.3	1.926	1.56	Kid. Cortex		Proteinuric	Arg diet	962	431	349	Kid. Cortex
Proteinuric	Arg diet	4.519	0.538	1.452	Kid. Cortex		Proteinuric	Arg diet	1033	123	332	Kid. Cortex
Proteinuric	Arg diet	5.314	0.283	1.716	Kid. Cortex		Proteinuric	Arg diet	638	34	206	Kid. Cortex
Control	Control diet	0	0	0	Kid. Cortex		Control	Control diet	0	0	0	Kid. Cortex
Control	Control diet	0.011	0	0	Kid. Cortex		Control	Control diet	1	0	0	Kid. Cortex
Control	Control diet	0	0	0	Kid. Cortex		Control	Control diet	0	0	0	Kid. Cortex
Proteinuric	Control diet	0	0	0	Kid. Cortex		Proteinuric	Control diet	0	0	0	Kid. Cortex
Proteinuric	Control diet	0	0	0	Kid. Cortex		Proteinuric	Control diet	0	0	0	Kid. Cortex
Proteinuric	Control diet	0.007	0	0	Kid. Cortex		Proteinuric	Control diet	1	0	0	Kid. Cortex
Proteinuric	Control diet	0	0	0	Kid. Cortex		Proteinuric	Control diet	0	0	0	Kid. Cortex
Proteinuric	Control diet	0	0	0.007	Kid. Cortex		Proteinuric	Control diet	0	0	1	Kid. Cortex
Control	Arg diet	4.191	2.716	3.368	Kid. Medulla		Control	Arg diet	270	175	217	Kid. Medulla
Control	Arg diet	4.888	3.401	3.174	Kid. Medulla		Control	Arg diet	756	526	491	Kid. Medulla
Control	Arg diet	3.117	4.187	3.612	Kid. Medulla		Control	Arg diet	233	313	270	Kid. Medulla
Proteinuric	Arg diet	2.186	3.582	2.381	Kid. Medulla		Proteinuric	Arg diet	291	477	317	Kid. Medulla
Proteinuric	Arg diet	3.031	2.307	1.287	Kid. Medulla		Proteinuric	Arg diet	716	545	304	Kid. Medulla
Proteinuric	Arg diet	3.55	2.982	1.672	Kid. Medulla		Proteinuric	Arg diet	862	724	406	Kid. Medulla
Proteinuric	Arg diet	2.604	2.53	1.939	Kid. Medulla		Proteinuric	Arg diet	317	308	236	Kid. Medulla
Proteinuric	Arg diet	3.709	1.122	1.6	Kid. Medulla		Proteinuric	Arg diet	853	258	368	Kid. Medulla
Proteinuric	Arg diet	4.171	1.022	1.731	Kid. Medulla		Proteinuric	Arg diet	453	111	188	Kid. Medulla
Control	Control diet	0	0	0	Kid. Medulla		Control	Control diet	0	0	0	Kid. Medulla
Control	Control diet	0	0	0	Kid. Medulla		Control	Control diet	0	0	0	Kid. Medulla
Control	Control diet	0	0	0	Kid. Medulla		Control	Control diet	0	0	0	Kid. Medulla
Proteinuric	Control diet	0	0.014	0	Kid. Medulla		Proteinuric	Control diet	0	2	0	Kid. Medulla
Proteinuric	Control diet	0	0	0.007	Kid. Medulla		Proteinuric	Control diet	0	0	1	Kid. Medulla
Proteinuric	Control diet	0	0	0	Kid. Medulla		Proteinuric	Control diet	0	0	0	Kid. Medulla
Proteinuric	Control diet	0	0.007	0.007	Kid. Medulla		Proteinuric	Control diet	0	1	1	Kid. Medulla
Proteinuric	Control diet	0.007	0	0.007	Kid. Medulla		Proteinuric	Control diet	1	0	1	Kid. Medulla
Proteinuric	Control diet	0	0	0	Kid. Medulla		Proteinuric	Control diet	0	0	0	Kid. Medulla
