# Supplementary material for: Diversion of Arginine’s dietary metabolic fate in proteinuric kidney disease
Source: Research Square preprint supplement (doi:10.21203/rs.3.rs-9927381/v1), 2026-06-17
Supplement: Supplementary file 26 [file e0bb5716112b10d6416f70bb.xlsx]

## Sheet: Per_mouse_summary
MouseID	N_tubules	Mean_detected_proteins	Median_detected_proteins	SD_detected_proteins	Min_detected_proteins	Max_detected_proteins	SEM
Control_1	87	2318.57	2491	622.144	241	3026	66.7008
Control_2	95	1861.38	2018	593.805	315	2762	60.9231
Proteinuric_1	61	2172.2	2236	281.546	874	2554	36.0483
Proteinuric_2	57	2356.33	2383	329.439	562	2823	43.6352

## Sheet: Per_tubule_values
MouseID	Samples	N_detected_proteins
Control_1	F:\Yifan\20230908_singletubule_raw\230901_st_93_A1.raw	363
Control_1	F:\Yifan\20230908_singletubule_raw\230901_st_93_A10.raw	2476
Control_1	F:\Yifan\20230908_singletubule_raw\230901_st_93_A11.raw	2335
Control_1	F:\Yifan\20230908_singletubule_raw\230901_st_93_A12.raw	2329
Control_1	F:\Yifan\20230908_singletubule_raw\230901_st_93_A2.raw	282
Control_1	F:\Yifan\20230908_singletubule_raw\230901_st_93_A3.raw	1152
Control_1	F:\Yifan\20230908_singletubule_raw\230901_st_93_A4.raw	287
Control_1	F:\Yifan\20230908_singletubule_raw\230901_st_93_A6.raw	284
Control_1	F:\Yifan\20230908_singletubule_raw\230901_st_93_A7.raw	1924
Control_1	F:\Yifan\20230908_singletubule_raw\230901_st_93_A8.raw	1937
Control_1	F:\Yifan\20230908_singletubule_raw\230901_st_93_A9.raw	2689
Control_1	F:\Yifan\20230908_singletubule_raw\230901_st_93_B1.raw	2330
Control_1	F:\Yifan\20230908_singletubule_raw\230901_st_93_B10.raw	2638
Control_1	F:\Yifan\20230908_singletubule_raw\230901_st_93_B11.raw	2735
Control_1	F:\Yifan\20230908_singletubule_raw\230901_st_93_B12.raw	2639
Control_1	F:\Yifan\20230908_singletubule_raw\230901_st_93_B2.raw	2555
Control_1	F:\Yifan\20230908_singletubule_raw\230901_st_93_B3.raw	1699
Control_1	F:\Yifan\20230908_singletubule_raw\230901_st_93_B4.raw	2406
Control_1	F:\Yifan\20230908_singletubule_raw\230901_st_93_B6.raw	2866
Control_1	F:\Yifan\20230908_singletubule_raw\230901_st_93_B7.raw	2387
Control_1	F:\Yifan\20230908_singletubule_raw\230901_st_93_B8.raw	241
Control_1	F:\Yifan\20230908_singletubule_raw\230901_st_93_B9.raw	2274
Control_1	F:\Yifan\20230908_singletubule_raw\230901_st_93_C1.raw	2409
Control_1	F:\Yifan\20230908_singletubule_raw\230901_st_93_C10.raw	2486
Control_1	F:\Yifan\20230908_singletubule_raw\230901_st_93_C11.raw	2517
Control_1	F:\Yifan\20230908_singletubule_raw\230901_st_93_C12.raw	2637
Control_1	F:\Yifan\20230908_singletubule_raw\230901_st_93_C2.raw	2191
Control_1	F:\Yifan\20230908_singletubule_raw\230901_st_93_C3.raw	2162
Control_1	F:\Yifan\20230908_singletubule_raw\230901_st_93_C4.raw	2164
Control_1	F:\Yifan\20230908_singletubule_raw\230901_st_93_C7.raw	2690
Control_1	F:\Yifan\20230908_singletubule_raw\230901_st_93_C8.raw	1934
Control_1	F:\Yifan\20230908_singletubule_raw\230901_st_93_C9.raw	2663
Control_1	F:\Yifan\20230908_singletubule_raw\230901_st_93_D1.raw	2566
Control_1	F:\Yifan\20230908_singletubule_raw\230901_st_93_D10.raw	2662
Control_1	F:\Yifan\20230908_singletubule_raw\230901_st_93_D11.raw	2111
Control_1	F:\Yifan\20230908_singletubule_raw\230901_st_93_D12.raw	2517
Control_1	F:\Yifan\20230908_singletubule_raw\230901_st_93_D2.raw	2547
Control_1	F:\Yifan\20230908_singletubule_raw\230901_st_93_D3.raw	2687
Control_1	F:\Yifan\20230908_singletubule_raw\230901_st_93_D4.raw	2640
Control_1	F:\Yifan\20230908_singletubule_raw\230901_st_93_D6.raw	2587
Control_1	F:\Yifan\20230908_singletubule_raw\230901_st_93_D7.raw	1615
Control_1	F:\Yifan\20230908_singletubule_raw\230901_st_93_D8.raw	2519
Control_1	F:\Yifan\20230908_singletubule_raw\230901_st_93_D9.raw	2278
Control_1	F:\Yifan\20230908_singletubule_raw\230901_st_93_E1.raw	2003
Control_1	F:\Yifan\20230908_singletubule_raw\230901_st_93_E10.raw	2419
Control_1	F:\Yifan\20230908_singletubule_raw\230901_st_93_E11.raw	2597
Control_1	F:\Yifan\20230908_singletubule_raw\230901_st_93_E12.raw	2296
Control_1	F:\Yifan\20230908_singletubule_raw\230901_st_93_E2.raw	2260
Control_1	F:\Yifan\20230908_singletubule_raw\230901_st_93_E3.raw	2831
Control_1	F:\Yifan\20230908_singletubule_raw\230901_st_93_E4.raw	2410
Control_1	F:\Yifan\20230908_singletubule_raw\230901_st_93_E6.raw	2817
Control_1	F:\Yifan\20230908_singletubule_raw\230901_st_93_E7.raw	2846
Control_1	F:\Yifan\20230908_singletubule_raw\230901_st_93_E8.raw	3011
Control_1	F:\Yifan\20230908_singletubule_raw\230901_st_93_E9.raw	2861
Control_1	F:\Yifan\20230908_singletubule_raw\230901_st_93_F1.raw	2491
Control_1	F:\Yifan\20230908_singletubule_raw\230901_st_93_F10.raw	2821
Control_1	F:\Yifan\20230908_singletubule_raw\230901_st_93_F11.raw	2236
Control_1	F:\Yifan\20230908_singletubule_raw\230901_st_93_F12.raw	2588
Control_1	F:\Yifan\20230908_singletubule_raw\230901_st_93_F2.raw	2487
Control_1	F:\Yifan\20230908_singletubule_raw\230901_st_93_F3.raw	2640
Control_1	F:\Yifan\20230908_singletubule_raw\230901_st_93_F4.raw	2307
Control_1	F:\Yifan\20230908_singletubule_raw\230901_st_93_F6.raw	2464
Control_1	F:\Yifan\20230908_singletubule_raw\230901_st_93_F7.raw	2498
Control_1	F:\Yifan\20230908_singletubule_raw\230901_st_93_F8.raw	2027
Control_1	F:\Yifan\20230908_singletubule_raw\230901_st_93_F9.raw	2810
Control_1	F:\Yifan\20230908_singletubule_raw\230901_st_93_G1.raw	1891
Control_1	F:\Yifan\20230908_singletubule_raw\230901_st_93_G10.raw	3026
Control_1	F:\Yifan\20230908_singletubule_raw\230901_st_93_G11.raw	2903
Control_1	F:\Yifan\20230908_singletubule_raw\230901_st_93_G12.raw	2584
Control_1	F:\Yifan\20230908_singletubule_raw\230901_st_93_G2.raw	2637
Control_1	F:\Yifan\20230908_singletubule_raw\230901_st_93_G3.raw	2114
Control_1	F:\Yifan\20230908_singletubule_raw\230901_st_93_G4.raw	2701
Control_1	F:\Yifan\20230908_singletubule_raw\230901_st_93_G6.raw	1889
Control_1	F:\Yifan\20230908_singletubule_raw\230901_st_93_G7.raw	2835
Control_1	F:\Yifan\20230908_singletubule_raw\230901_st_93_G8.raw	2649
Control_1	F:\Yifan\20230908_singletubule_raw\230901_st_93_G9.raw	2780
Control_1	F:\Yifan\20230908_singletubule_raw\230901_st_93_H1.raw	2491
Control_1	F:\Yifan\20230908_singletubule_raw\230901_st_93_H10.raw	2893
Control_1	F:\Yifan\20230908_singletubule_raw\230901_st_93_H11.raw	2778
Control_1	F:\Yifan\20230908_singletubule_raw\230901_st_93_H12.raw	2892
Control_1	F:\Yifan\20230908_singletubule_raw\230901_st_93_H2.raw	2475
Control_1	F:\Yifan\20230908_singletubule_raw\230901_st_93_H3.raw	2921
Control_1	F:\Yifan\20230908_singletubule_raw\230901_st_93_H4.raw	2670
Control_1	F:\Yifan\20230908_singletubule_raw\230901_st_93_H6.raw	1236
Control_1	F:\Yifan\20230908_singletubule_raw\230901_st_93_H7.raw	1893
Control_1	F:\Yifan\20230908_singletubule_raw\230901_st_93_H8.raw	1738
Control_1	F:\Yifan\20230908_singletubule_raw\230901_st_93_H9.raw	2590
Control_2	F:\Yifan\20230908_singletubule_raw\230901_st_89_A1.raw	489
Control_2	F:\Yifan\20230908_singletubule_raw\230901_st_89_A10.raw	2149
Control_2	F:\Yifan\20230908_singletubule_raw\230901_st_89_A11.raw	1666
Control_2	F:\Yifan\20230908_singletubule_raw\230901_st_89_A12.raw	1679
Control_2	F:\Yifan\20230908_singletubule_raw\230901_st_89_A2.raw	2234
Control_2	F:\Yifan\20230908_singletubule_raw\230901_st_89_A3.raw	1799
Control_2	F:\Yifan\20230908_singletubule_raw\230901_st_89_A4.raw	315
Control_2	F:\Yifan\20230908_singletubule_raw\230901_st_89_A5.raw	2127
Control_2	F:\Yifan\20230908_singletubule_raw\230901_st_89_A6.raw	1624
Control_2	F:\Yifan\20230908_singletubule_raw\230901_st_89_A7.raw	498
Control_2	F:\Yifan\20230908_singletubule_raw\230901_st_89_A8.raw	2103
Control_2	F:\Yifan\20230908_singletubule_raw\230901_st_89_A9.raw	2359
Control_2	F:\Yifan\20230908_singletubule_raw\230901_st_89_B1.raw	1957
Control_2	F:\Yifan\20230908_singletubule_raw\230901_st_89_B10.raw	1698
Control_2	F:\Yifan\20230908_singletubule_raw\230901_st_89_B11.raw	2440
Control_2	F:\Yifan\20230908_singletubule_raw\230901_st_89_B12.raw	469
Control_2	F:\Yifan\20230908_singletubule_raw\230901_st_89_B2.raw	2034
Control_2	F:\Yifan\20230908_singletubule_raw\230901_st_89_B3.raw	2410
Control_2	F:\Yifan\20230908_singletubule_raw\230901_st_89_B4.raw	1919
Control_2	F:\Yifan\20230908_singletubule_raw\230901_st_89_B5.raw	1489
Control_2	F:\Yifan\20230908_singletubule_raw\230901_st_89_B6.raw	1587
Control_2	F:\Yifan\20230908_singletubule_raw\230901_st_89_B7.raw	2054
Control_2	F:\Yifan\20230908_singletubule_raw\230901_st_89_B8.raw	2138
Control_2	F:\Yifan\20230908_singletubule_raw\230901_st_89_B9.raw	1536
Control_2	F:\Yifan\20230908_singletubule_raw\230901_st_89_C1.raw	2156
Control_2	F:\Yifan\20230908_singletubule_raw\230901_st_89_C10.raw	2135
Control_2	F:\Yifan\20230908_singletubule_raw\230901_st_89_C11.raw	2105
Control_2	F:\Yifan\20230908_singletubule_raw\230901_st_89_C12.raw	1908
Control_2	F:\Yifan\20230908_singletubule_raw\230901_st_89_C2.raw	1439
Control_2	F:\Yifan\20230908_singletubule_raw\230901_st_89_C3.raw	1633
Control_2	F:\Yifan\20230908_singletubule_raw\230901_st_89_C4.raw	1735
Control_2	F:\Yifan\20230908_singletubule_raw\230901_st_89_C5.raw	2034
Control_2	F:\Yifan\20230908_singletubule_raw\230901_st_89_C6.raw	2077
Control_2	F:\Yifan\20230908_singletubule_raw\230901_st_89_C7.raw	2046
Control_2	F:\Yifan\20230908_singletubule_raw\230901_st_89_C8.raw	2409
Control_2	F:\Yifan\20230908_singletubule_raw\230901_st_89_C9.raw	2691
Control_2	F:\Yifan\20230908_singletubule_raw\230901_st_89_D1.raw	1284
Control_2	F:\Yifan\20230908_singletubule_raw\230901_st_89_D10.raw	2644
Control_2	F:\Yifan\20230908_singletubule_raw\230901_st_89_D11.raw	1790
Control_2	F:\Yifan\20230908_singletubule_raw\230901_st_89_D12.raw	2378
Control_2	F:\Yifan\20230908_singletubule_raw\230901_st_89_D2.raw	1499
Control_2	F:\Yifan\20230908_singletubule_raw\230901_st_89_D3.raw	1738
Control_2	F:\Yifan\20230908_singletubule_raw\230901_st_89_D4.raw	2242
Control_2	F:\Yifan\20230908_singletubule_raw\230901_st_89_D5.raw	1575
Control_2	F:\Yifan\20230908_singletubule_raw\230901_st_89_D6.raw	1561
Control_2	F:\Yifan\20230908_singletubule_raw\230901_st_89_D7.raw	2372
Control_2	F:\Yifan\20230908_singletubule_raw\230901_st_89_D8.raw	2062
Control_2	F:\Yifan\20230908_singletubule_raw\230901_st_89_D9.raw	2018
Control_2	F:\Yifan\20230908_singletubule_raw\230901_st_89_E1.raw	2267
Control_2	F:\Yifan\20230908_singletubule_raw\230901_st_89_E10.raw	2047
Control_2	F:\Yifan\20230908_singletubule_raw\230901_st_89_E11.raw	2762
Control_2	F:\Yifan\20230908_singletubule_raw\230901_st_89_E12.raw	2367
Control_2	F:\Yifan\20230908_singletubule_raw\230901_st_89_E2.raw	1785
Control_2	F:\Yifan\20230908_singletubule_raw\230901_st_89_E3.raw	1582
Control_2	F:\Yifan\20230908_singletubule_raw\230901_st_89_E4.raw	1377
Control_2	F:\Yifan\20230908_singletubule_raw\230901_st_89_E5.raw	686
Control_2	F:\Yifan\20230908_singletubule_raw\230901_st_89_E6.raw	1700
Control_2	F:\Yifan\20230908_singletubule_raw\230901_st_89_E7.raw	2543
Control_2	F:\Yifan\20230908_singletubule_raw\230901_st_89_E8.raw	1042
Control_2	F:\Yifan\20230908_singletubule_raw\230901_st_89_E9.raw	2425
Control_2	F:\Yifan\20230908_singletubule_raw\230901_st_89_F1.raw	2512
Control_2	F:\Yifan\20230908_singletubule_raw\230901_st_89_F10.raw	2657
Control_2	F:\Yifan\20230908_singletubule_raw\230901_st_89_F11.raw	2420
Control_2	F:\Yifan\20230908_singletubule_raw\230901_st_89_F12.raw	2592
Control_2	F:\Yifan\20230908_singletubule_raw\230901_st_89_F2.raw	396
Control_2	F:\Yifan\20230908_singletubule_raw\230901_st_89_F3.raw	1875
Control_2	F:\Yifan\20230908_singletubule_raw\230901_st_89_F4.raw	1590
Control_2	F:\Yifan\20230908_singletubule_raw\230901_st_89_F5.raw	2341
Control_2	F:\Yifan\20230908_singletubule_raw\230901_st_89_F6.raw	1898
Control_2	F:\Yifan\20230908_singletubule_raw\230901_st_89_F7.raw	1867
Control_2	F:\Yifan\20230908_singletubule_raw\230901_st_89_F8.raw	2114
Control_2	F:\Yifan\20230908_singletubule_raw\230901_st_89_F9.raw	2574
Control_2	F:\Yifan\20230908_singletubule_raw\230901_st_89_G1.raw	1891
Control_2	F:\Yifan\20230908_singletubule_raw\230901_st_89_G10.raw	922
Control_2	F:\Yifan\20230908_singletubule_raw\230901_st_89_G11.raw	2666
Control_2	F:\Yifan\20230908_singletubule_raw\230901_st_89_G12.raw	2292
Control_2	F:\Yifan\20230908_singletubule_raw\230901_st_89_G2.raw	1782
Control_2	F:\Yifan\20230908_singletubule_raw\230901_st_89_G3.raw	582
Control_2	F:\Yifan\20230908_singletubule_raw\230901_st_89_G4.raw	1795
Control_2	F:\Yifan\20230908_singletubule_raw\230901_st_89_G5.raw	523
Control_2	F:\Yifan\20230908_singletubule_raw\230901_st_89_G7.raw	1566
Control_2	F:\Yifan\20230908_singletubule_raw\230901_st_89_G8.raw	2201
Control_2	F:\Yifan\20230908_singletubule_raw\230901_st_89_G9.raw	2625
Control_2	F:\Yifan\20230908_singletubule_raw\230901_st_89_H1.raw	1498
Control_2	F:\Yifan\20230908_singletubule_raw\230901_st_89_H10.raw	2285
Control_2	F:\Yifan\20230908_singletubule_raw\230901_st_89_H11.raw	2378
Control_2	F:\Yifan\20230908_singletubule_raw\230901_st_89_H12.raw	697
Control_2	F:\Yifan\20230908_singletubule_raw\230901_st_89_H2.raw	2381
Control_2	F:\Yifan\20230908_singletubule_raw\230901_st_89_H3.raw	2032
Control_2	F:\Yifan\20230908_singletubule_raw\230901_st_89_H4.raw	1506
Control_2	F:\Yifan\20230908_singletubule_raw\230901_st_89_H5.raw	2264
Control_2	F:\Yifan\20230908_singletubule_raw\230901_st_89_H6.raw	2520
Control_2	F:\Yifan\20230908_singletubule_raw\230901_st_89_H7.raw	1862
Control_2	F:\Yifan\20230908_singletubule_raw\230901_st_89_H8.raw	2117
Control_2	F:\Yifan\20230908_singletubule_raw\230901_st_89_H9.raw	723
Proteinuric_1	F:\Yifan\20230908_singletubule_raw\230812_st_92_1.raw	2343
Proteinuric_1	F:\Yifan\20230908_singletubule_raw\230812_st_92_10.raw	2288
Proteinuric_1	F:\Yifan\20230908_singletubule_raw\230812_st_92_11.raw	1887
Proteinuric_1	F:\Yifan\20230908_singletubule_raw\230812_st_92_13.raw	1845
Proteinuric_1	F:\Yifan\20230908_singletubule_raw\230812_st_92_14.raw	2338
Proteinuric_1	F:\Yifan\20230908_singletubule_raw\230812_st_92_16.raw	2229
Proteinuric_1	F:\Yifan\20230908_singletubule_raw\230812_st_92_18.raw	2337
Proteinuric_1	F:\Yifan\20230908_singletubule_raw\230812_st_92_21.raw	2337
Proteinuric_1	F:\Yifan\20230908_singletubule_raw\230812_st_92_22.raw	2236
Proteinuric_1	F:\Yifan\20230908_singletubule_raw\230812_st_92_23.raw	2415
Proteinuric_1	F:\Yifan\20230908_singletubule_raw\230812_st_92_24.raw	2412
Proteinuric_1	F:\Yifan\20230908_singletubule_raw\230812_st_92_27.raw	2515
Proteinuric_1	F:\Yifan\20230908_singletubule_raw\230812_st_92_3.raw	1640
Proteinuric_1	F:\Yifan\20230908_singletubule_raw\230812_st_92_32.raw	2241
Proteinuric_1	F:\Yifan\20230908_singletubule_raw\230812_st_92_34.raw	2243
Proteinuric_1	F:\Yifan\20230908_singletubule_raw\230812_st_92_4.raw	2554
Proteinuric_1	F:\Yifan\20230908_singletubule_raw\230812_st_92_41.raw	2076
Proteinuric_1	F:\Yifan\20230908_singletubule_raw\230812_st_92_42.raw	2124
Proteinuric_1	F:\Yifan\20230908_singletubule_raw\230812_st_92_45.raw	2111
Proteinuric_1	F:\Yifan\20230908_singletubule_raw\230812_st_92_46.raw	2181
Proteinuric_1	F:\Yifan\20230908_singletubule_raw\230812_st_92_49.raw	2271
Proteinuric_1	F:\Yifan\20230908_singletubule_raw\230812_st_92_51.raw	2018
Proteinuric_1	F:\Yifan\20230908_singletubule_raw\230812_st_92_52.raw	2049
Proteinuric_1	F:\Yifan\20230908_singletubule_raw\230812_st_92_59.raw	2368
Proteinuric_1	F:\Yifan\20230908_singletubule_raw\230812_st_92_60.raw	2163
Proteinuric_1	F:\Yifan\20230908_singletubule_raw\230812_st_92_61.raw	2253
Proteinuric_1	F:\Yifan\20230908_singletubule_raw\230812_st_92_62.raw	2544
Proteinuric_1	F:\Yifan\20230908_singletubule_raw\230812_st_92_64.raw	2234
Proteinuric_1	F:\Yifan\20230908_singletubule_raw\230812_st_92_66.raw	2126
Proteinuric_1	F:\Yifan\20230908_singletubule_raw\230812_st_92_67.raw	2218
Proteinuric_1	F:\Yifan\20230908_singletubule_raw\230812_st_92_68.raw	1926
Proteinuric_1	F:\Yifan\20230908_singletubule_raw\230812_st_92_69.raw	2392
Proteinuric_1	F:\Yifan\20230908_singletubule_raw\230812_st_92_70.raw	2453
Proteinuric_1	F:\Yifan\20230908_singletubule_raw\230812_st_92_71.raw	2451
Proteinuric_1	F:\Yifan\20230908_singletubule_raw\230812_st_92_73.raw	2403
Proteinuric_1	F:\Yifan\20230908_singletubule_raw\230812_st_92_74.raw	1683
Proteinuric_1	F:\Yifan\20230908_singletubule_raw\230812_st_92_75.raw	2352
Proteinuric_1	F:\Yifan\20230908_singletubule_raw\230812_st_92_78.raw	1714
Proteinuric_1	F:\Yifan\20230908_singletubule_raw\230812_st_92_8.raw	2292
Proteinuric_1	F:\Yifan\20230908_singletubule_raw\230812_st_92_86.raw	2138
Proteinuric_1	F:\Yifan\20230908_singletubule_raw\230812_st_92_88.raw	2430
Proteinuric_1	F:\Yifan\20230908_singletubule_raw\230812_st_92_9.raw	1963
Proteinuric_1	F:\Yifan\20230908_singletubule_raw\230812_st_92_90.raw	2319
Proteinuric_1	F:\Yifan\20230908_singletubule_raw\230812_st_92_91.raw	2475
Proteinuric_1	F:\Yifan\20230908_singletubule_raw\230812_st_92_92.raw	2487
Proteinuric_1	F:\Yifan\20230908_singletubule_raw\230812_st_92_93.raw	2145
Proteinuric_1	F:\Yifan\20230908_singletubule_raw\230815_st_92_19.raw	2279
Proteinuric_1	F:\Yifan\20230908_singletubule_raw\230815_st_92_26.raw	874
Proteinuric_1	F:\Yifan\20230908_singletubule_raw\230815_st_92_30.raw	2091
Proteinuric_1	F:\Yifan\20230908_singletubule_raw\230815_st_92_31.raw	2086
Proteinuric_1	F:\Yifan\20230908_singletubule_raw\230815_st_92_38.raw	1907
Proteinuric_1	F:\Yifan\20230908_singletubule_raw\230815_st_92_40.raw	2148
Proteinuric_1	F:\Yifan\20230908_singletubule_raw\230815_st_92_48.raw	2299
Proteinuric_1	F:\Yifan\20230908_singletubule_raw\230815_st_92_53.raw	1699
Proteinuric_1	F:\Yifan\20230908_singletubule_raw\230815_st_92_54.raw	1914
Proteinuric_1	F:\Yifan\20230908_singletubule_raw\230815_st_92_72.raw	1897
Proteinuric_1	F:\Yifan\20230908_singletubule_raw\230815_st_92_77.raw	1887
Proteinuric_1	F:\Yifan\20230908_singletubule_raw\230815_st_92_81.raw	2499
Proteinuric_1	F:\Yifan\20230908_singletubule_raw\230815_st_92_84.raw	2179
Proteinuric_1	F:\Yifan\20230908_singletubule_raw\230815_st_92_87.raw	2261
Proteinuric_1	F:\Yifan\20230908_singletubule_raw\230815_st_92_96.raw	2265
Proteinuric_2	F:\Yifan\20230908_singletubule_raw\230812_st_88_1.raw	1948
Proteinuric_2	F:\Yifan\20230908_singletubule_raw\230812_st_88_10.raw	2302
Proteinuric_2	F:\Yifan\20230908_singletubule_raw\230812_st_88_11.raw	2670
Proteinuric_2	F:\Yifan\20230908_singletubule_raw\230812_st_88_13.raw	2192
Proteinuric_2	F:\Yifan\20230908_singletubule_raw\230812_st_88_14.raw	2420
Proteinuric_2	F:\Yifan\20230908_singletubule_raw\230812_st_88_20.raw	2636
Proteinuric_2	F:\Yifan\20230908_singletubule_raw\230812_st_88_21.raw	2749
Proteinuric_2	F:\Yifan\20230908_singletubule_raw\230812_st_88_22.raw	2631
Proteinuric_2	F:\Yifan\20230908_singletubule_raw\230812_st_88_23.raw	2146
Proteinuric_2	F:\Yifan\20230908_singletubule_raw\230812_st_88_25.raw	1930
Proteinuric_2	F:\Yifan\20230908_singletubule_raw\230812_st_88_27.raw	1906
Proteinuric_2	F:\Yifan\20230908_singletubule_raw\230812_st_88_28.raw	2300
Proteinuric_2	F:\Yifan\20230908_singletubule_raw\230812_st_88_3.raw	2209
Proteinuric_2	F:\Yifan\20230908_singletubule_raw\230812_st_88_31.raw	2608
Proteinuric_2	F:\Yifan\20230908_singletubule_raw\230812_st_88_33.raw	2668
Proteinuric_2	F:\Yifan\20230908_singletubule_raw\230812_st_88_35.raw	2404
Proteinuric_2	F:\Yifan\20230908_singletubule_raw\230812_st_88_36.raw	2823
Proteinuric_2	F:\Yifan\20230908_singletubule_raw\230812_st_88_37.raw	2614
Proteinuric_2	F:\Yifan\20230908_singletubule_raw\230812_st_88_38.raw	2369
Proteinuric_2	F:\Yifan\20230908_singletubule_raw\230812_st_88_42.raw	2409
Proteinuric_2	F:\Yifan\20230908_singletubule_raw\230812_st_88_43.raw	2593
Proteinuric_2	F:\Yifan\20230908_singletubule_raw\230812_st_88_45.raw	2243
Proteinuric_2	F:\Yifan\20230908_singletubule_raw\230812_st_88_47.raw	2529
Proteinuric_2	F:\Yifan\20230908_singletubule_raw\230812_st_88_48.raw	2383
Proteinuric_2	F:\Yifan\20230908_singletubule_raw\230812_st_88_49.raw	2242
Proteinuric_2	F:\Yifan\20230908_singletubule_raw\230812_st_88_54.raw	2139
Proteinuric_2	F:\Yifan\20230908_singletubule_raw\230812_st_88_55.raw	2298
Proteinuric_2	F:\Yifan\20230908_singletubule_raw\230812_st_88_56.raw	2420
Proteinuric_2	F:\Yifan\20230908_singletubule_raw\230812_st_88_57.raw	2723
Proteinuric_2	F:\Yifan\20230908_singletubule_raw\230812_st_88_6.raw	2288
Proteinuric_2	F:\Yifan\20230908_singletubule_raw\230812_st_88_61.raw	2127
Proteinuric_2	F:\Yifan\20230908_singletubule_raw\230812_st_88_62.raw	2229
Proteinuric_2	F:\Yifan\20230908_singletubule_raw\230812_st_88_66.raw	2455
Proteinuric_2	F:\Yifan\20230908_singletubule_raw\230812_st_88_67.raw	2537
Proteinuric_2	F:\Yifan\20230908_singletubule_raw\230812_st_88_7.raw	2326
Proteinuric_2	F:\Yifan\20230908_singletubule_raw\230812_st_88_71.raw	2740
Proteinuric_2	F:\Yifan\20230908_singletubule_raw\230812_st_88_75.raw	2127
Proteinuric_2	F:\Yifan\20230908_singletubule_raw\230812_st_88_76.raw	2118
Proteinuric_2	F:\Yifan\20230908_singletubule_raw\230812_st_88_77.raw	2416
Proteinuric_2	F:\Yifan\20230908_singletubule_raw\230812_st_88_8.raw	2228
Proteinuric_2	F:\Yifan\20230908_singletubule_raw\230812_st_88_83.raw	2712
Proteinuric_2	F:\Yifan\20230908_singletubule_raw\230812_st_88_86.raw	2394
Proteinuric_2	F:\Yifan\20230908_singletubule_raw\230812_st_88_89.raw	2532
Proteinuric_2	F:\Yifan\20230908_singletubule_raw\230812_st_88_9.raw	2423
Proteinuric_2	F:\Yifan\20230908_singletubule_raw\230812_st_88_90.raw	2286
Proteinuric_2	F:\Yifan\20230908_singletubule_raw\230812_st_88_91.raw	2637
Proteinuric_2	F:\Yifan\20230908_singletubule_raw\230812_st_88_94.raw	2368
Proteinuric_2	F:\Yifan\20230908_singletubule_raw\230812_st_88_96.raw	2302
Proteinuric_2	F:\Yifan\20230908_singletubule_raw\230815_st_88_16.raw	2293
Proteinuric_2	F:\Yifan\20230908_singletubule_raw\230815_st_88_34.raw	2720
Proteinuric_2	F:\Yifan\20230908_singletubule_raw\230815_st_88_39.raw	2073
Proteinuric_2	F:\Yifan\20230908_singletubule_raw\230815_st_88_40.raw	2418
Proteinuric_2	F:\Yifan\20230908_singletubule_raw\230815_st_88_59.raw	2576
Proteinuric_2	F:\Yifan\20230908_singletubule_raw\230815_st_88_65.raw	562
Proteinuric_2	F:\Yifan\20230908_singletubule_raw\230815_st_88_72.raw	2597
Proteinuric_2	F:\Yifan\20230908_singletubule_raw\230815_st_88_73.raw	2155
Proteinuric_2	F:\Yifan\20230908_singletubule_raw\230815_st_88_88.raw	2168
