# Supplementary material for: Diversion of Arginine’s dietary metabolic fate in proteinuric kidney disease
Source: Research Square preprint supplement (doi:10.21203/rs.3.rs-9927381/v1), 2026-06-17
Supplement: Supplementary file 27 [file f29c6e03011a14156891e333.xlsx]

## Sheet: Kid. Cortex
Organ	PG.Genes	PG.ProteinNames	PG.UniProtIds	Control_AD_1__PG.NrOfStrippedSequencesUsedForQuantification	Control_AD_2__PG.NrOfStrippedSequencesUsedForQuantification	Control_AD_3__PG.NrOfStrippedSequencesUsedForQuantification	Control_AD_4__PG.NrOfStrippedSequencesUsedForQuantification	Control_AD_5__PG.NrOfStrippedSequencesUsedForQuantification	Control_ND_1__PG.NrOfStrippedSequencesUsedForQuantification	Control_ND_2__PG.NrOfStrippedSequencesUsedForQuantification	Control_ND_3__PG.NrOfStrippedSequencesUsedForQuantification	Control_ND_4__PG.NrOfStrippedSequencesUsedForQuantification	Control_ND_5__PG.NrOfStrippedSequencesUsedForQuantification	Proteinuric_AD_1__PG.NrOfStrippedSequencesUsedForQuantification	Proteinuric_AD_2__PG.NrOfStrippedSequencesUsedForQuantification	Proteinuric_AD_3__PG.NrOfStrippedSequencesUsedForQuantification	Proteinuric_AD_4__PG.NrOfStrippedSequencesUsedForQuantification	Proteinuric_AD_5__PG.NrOfStrippedSequencesUsedForQuantification	Proteinuric_ND_1__PG.NrOfStrippedSequencesUsedForQuantification	Proteinuric_ND_2__PG.NrOfStrippedSequencesUsedForQuantification	Proteinuric_ND_3__PG.NrOfStrippedSequencesUsedForQuantification	Proteinuric_ND_4__PG.NrOfStrippedSequencesUsedForQuantification	Control_AD_1__PG.Coverage	Control_AD_2__PG.Coverage	Control_AD_3__PG.Coverage	Control_AD_4__PG.Coverage	Control_AD_5__PG.Coverage	Control_ND_1__PG.Coverage	Control_ND_2__PG.Coverage	Control_ND_3__PG.Coverage	Control_ND_4__PG.Coverage	Control_ND_5__PG.Coverage	Proteinuric_AD_1__PG.Coverage	Proteinuric_AD_2__PG.Coverage	Proteinuric_AD_3__PG.Coverage	Proteinuric_AD_4__PG.Coverage	Proteinuric_AD_5__PG.Coverage	Proteinuric_ND_1__PG.Coverage	Proteinuric_ND_2__PG.Coverage	Proteinuric_ND_3__PG.Coverage	Proteinuric_ND_4__PG.Coverage	Control_AD_1__PG.Pvalue	Control_AD_2__PG.Pvalue	Control_AD_3__PG.Pvalue	Control_AD_4__PG.Pvalue	Control_AD_5__PG.Pvalue	Control_ND_1__PG.Pvalue	Control_ND_2__PG.Pvalue	Control_ND_3__PG.Pvalue
Kid. Cortex	Col12a1	COCA1_MOUSE	Q60847	63	44	45	51	49	56	79	75	74	75	85	107	99	104	100	100	92	95	105	25.7%	21.5%	20.1%	22.6%	22.2%	24.3%	31.7%	30.4%	31.4%	32.6%	35.6%	42.4%	40.5%	41.4%	40.4%	39.4%	37.5%	39.3%	42.6%	2.33115e-26	2.33115e-26	2.33115e-26	2.33115e-26	2.33115e-26	2.33115e-26	2.33115e-26	2.33115e-26
Kid. Cortex	Col14a1	B7ZNH7_MOUSE	B7ZNH7	49	42	46	47	45	48	52	52	54	52	50	53	54	54	51	55	55	53	55	35.6%	28.5%	33.3%	34.6%	30%	34.7%	39.1%	37.1%	39.1%	38.4%	38.1%	38.7%	40.3%	38.7%	36.5%	40.4%	40.7%	38.5%	40.2%	1.81008e-31	1.81008e-31	1.81008e-31	1.81008e-31	1.81008e-31	1.81008e-31	1.81008e-31	1.81008e-31
Kid. Cortex	Col15a1	A2AJY2_MOUSE;COFA1_MOUSE	A2AJY2;O35206	16	16	17	16	17	17	18	17	17	18	18	17	17	17	17	18	17	17	18	14.7%;14.5%	15.7%;15.4%	17.1%;16.8%	15.7%;15.4%	17.1%;16.8%	17%;16.8%	18.4%;18.1%	17.1%;16.8%	17%;16.8%	18.4%;18.1%	18.4%;18.1%	17.1%;16.8%	17.1%;16.8%	17.1%;16.8%	17.1%;16.8%	18.4%;18.1%	17.1%;16.8%	17.1%;16.8%	18.4%;18.1%	2.4144e-31	2.4144e-31	2.4144e-31	2.4144e-31	2.4144e-31	2.4144e-31	2.4144e-31	2.4144e-31
Kid. Cortex	Col16a1	A3KFV7_MOUSE;COGA1_MOUSE	A3KFV7;Q8BLX7	1	1	1	1			1	1				1		1	1	1	1		1	0.5%;0.4%	0.5%;0.4%	0.5%;0.4%	0.5%;0.4%			0.5%;0.4%	0.5%;0.4%				0.5%;0.4%		0.5%;0.4%	0.5%;0.4%	0.5%;0.4%	0.5%;0.4%		0.5%;0.4%	0.000910231	0.000910231	0.000910231	0.000910231			0.000910231	0.000910231
Kid. Cortex	Col18a1	E9QPX1_MOUSE;COIA1_MOUSE	E9QPX1;P39061	23	21	21	20	23	22	24	24	24	23	23	22	24	25	25	26	24	26	27	16.6%;16.6%	15.3%;15.3%	14.8%;14.8%	14.1%;14.1%	15.6%;15.6%	16.1%;16.1%	16.5%;16.5%	16.2%;16.2%	17%;17%	16.1%;16.1%	15.8%;15.8%	14.9%;14.9%	17%;17%	17.1%;17.1%	16.7%;16.7%	17.7%;17.7%	17%;17%	17.7%;17.7%	17.8%;17.8%	5.81588e-24	5.81588e-24	5.81588e-24	5.81588e-24	5.81588e-24	5.81588e-24	5.81588e-24	5.81588e-24
Kid. Cortex	Col1a1	CO1A1_MOUSE	P11087	15	12	12	15	10	9	22	23	15	19	19	15	17	10	18	22	22	19	25	16.1%	11%	12.1%	15.6%	9.2%	10.3%	21.3%	21.6%	14.7%	18%	18.4%	15.6%	14.6%	9%	17.8%	21%	20.6%	19.1%	23.6%	1.92759e-23	1.92759e-23	1.92759e-23	1.92759e-23	1.92759e-23	1.92759e-23	1.92759e-23	1.92759e-23
Kid. Cortex	Col1a2	CO1A2_MOUSE	Q01149	15	16	17	19	17	14	19	19	18	18	19	19	18	15	20	18	20	20	21	16.6%	17.3%	17%	20.6%	18.7%	15.9%	21.1%	20.6%	19.8%	20.6%	21.4%	19.5%	19.8%	15.9%	21.6%	18.7%	21.7%	21.6%	22.4%	1.44122e-30	1.44122e-30	1.44122e-30	1.44122e-30	1.44122e-30	1.44122e-30	1.44122e-30	1.44122e-30
Kid. Cortex	Col26a1	COQA1_MOUSE	Q91VF6	2		1		2						2					1	1		2	5.7%		2.7%		5.7%						5.7%					3%	3%		5.7%	0.000137178		0.000137178		0.000137178
Kid. Cortex	Col3a1	CO3A1_MOUSE	P08121	5	4	4	6			6	3	5	6	5	4	4	3	4	5	6	5	5	2.9%	2.1%	2.7%	4.2%			4.2%	1.4%	2.9%	4.2%	4.2%	2.8%	2.9%	2.3%	2.1%	3.4%	3.7%	2.8%	2.9%	2.829e-24	2.829e-24	2.829e-24	2.829e-24			2.829e-24	2.829e-24
Kid. Cortex	Col4a1	CO4A1_MOUSE	P02463	9	11	10	9	5	10	13	12	12	12	8	10	9	7	10	11	12	10	13	7.1%	9%	8.2%	8.1%	4.3%	10.5%	11.7%	11%	11.8%	10.8%	7.8%	7.7%	7.7%	5.8%	8.2%	10.8%	11.6%	10.1%	11.6%	8.761e-26	8.761e-26	8.761e-26	8.761e-26	8.761e-26	8.761e-26	8.761e-26	8.761e-26
Kid. Cortex	Col4a2	CO4A2_MOUSE	P08122	19	20	16	17	12	17	20	19	18	22	17	22	19	20	21	20	21	20	23	16.2%	16.2%	14.4%	15.1%	10.4%	15.2%	17.3%	15.9%	15.2%	17.5%	15.2%	17.5%	17.4%	16.9%	17.3%	17.3%	17.3%	17.8%	18.1%	6.87961e-25	6.87961e-25	6.87961e-25	6.87961e-25	6.87961e-25	6.87961e-25	6.87961e-25	6.87961e-25
Kid. Cortex	Col4a3	CO4A3_MOUSE	Q9QZS0	5	5	5	5	2	4	5	5	4	5	3	5	3	4	5	4	5	5	5	5.5%	5.8%	5.5%	5.5%	1.9%	4.3%	5.5%	5.5%	4.3%	5.5%	2.5%	5.5%	2.5%	3.7%	5.5%	4.3%	5.5%	5.5%	5.5%	1.8273e-26	1.8273e-26	1.8273e-26	1.8273e-26	1.8273e-26	1.8273e-26	1.8273e-26	1.8273e-26
Kid. Cortex	Col4a4	CO4A4_MOUSE	Q9QZR9	5	5	4	5	3	4	5	5	5	5	3	5	3	3	5	4	5	5	5	4.2%	4.2%	3.4%	4.2%	2.7%	3.5%	4.2%	4.2%	4.2%	4.2%	2.7%	4.2%	2.7%	2.7%	4.2%	3.4%	4.2%	4.2%	4.2%	1.83659e-12	1.83659e-12	1.83659e-12	1.83659e-12	1.83659e-12	1.83659e-12	1.83659e-12	1.83659e-12
Kid. Cortex	Col4a5	F7CK55_MOUSE;Q63ZW6_MOUSE	F7CK55;Q63ZW6	7	5	5	5	4	5	5	6	5	7	4	6	5	5	5	5	5	5	5	11.1%;5.3%	7.1%;3.4%	6.8%;3.2%	6.8%;3.2%	5.4%;2.5%	6.8%;3.2%	6.8%;3.2%	8.6%;4.1%	6.8%;3.2%	11.1%;5.3%	5.2%;2.5%	9.2%;4.4%	6.8%;3.2%	6.8%;3.2%	7.2%;3.4%	6.8%;3.2%	6.8%;3.2%	6.8%;3.2%	6.8%;3.2%	1.01695e-34	1.01695e-34	1.01695e-34	1.01695e-34	1.01695e-34	1.01695e-34	1.01695e-34	1.01695e-34
Kid. Cortex	Col4a6	B1AVK5_MOUSE	B1AVK5	3	2	2	2	1	2	3	2	2	3	1	3	3	2	3	3	3	3	3	2.8%	2.1%	1.3%	1.3%	0.8%	1.3%	2.8%	2.1%	1.3%	2.8%	0.8%	2.8%	2.8%	1.3%	2.8%	2.8%	2.8%	2.8%	2.8%	1.75525e-05	1.75525e-05	1.75525e-05	1.75525e-05	1.75525e-05	1.75525e-05	1.75525e-05	1.75525e-05
Kid. Cortex	Col5a1	CO5A1_MOUSE	O88207	6	3	7	6	6	6	7	6	7	8	8	9	8	10	10	9	9	10	10	5.7%	3.3%	6.4%	5.5%	5.4%	5.2%	5.4%	5.4%	6.4%	7.8%	7.8%	7.6%	6.9%	8.3%	8.3%	7.6%	6.7%	8.3%	8.3%	3.2163e-19	3.2163e-19	3.2163e-19	3.2163e-19	3.2163e-19	3.2163e-19	3.2163e-19	3.2163e-19
Kid. Cortex	Col5a2	CO5A2_MOUSE	Q3U962	2						2	2	2	2	2	2		2	3	3	3	3	3	2.3%						2.4%	2.4%	2.1%	2.1%	2.3%	2.4%		2.3%	3.4%	3.4%	3.4%	3.4%	3.4%	0.00128771						0.00128771	0.00128771
Kid. Cortex	Col5a3	Q9JLI2_MOUSE	Q9JLI2	4	1		2			2	2	2	2	1	1	1	1	1	2	3	3	1	3.1%	0.6%		1.9%			1.4%	1.6%	1.4%	1.6%	0.6%	0.6%	0.6%	0.6%	0.6%	1.6%	2.5%	2.5%	0.6%	5.81838e-07	5.81838e-07		5.81838e-07			5.81838e-07	5.81838e-07
Kid. Cortex	Col6a1	CO6A1_MOUSE	Q04857	30	27	30	27	28	26	28	28	28	26	23	29	27	27	30	28	28	27	29	36.1%	29.3%	34.4%	31.1%	32.8%	28.8%	34.1%	32.3%	34.3%	31.2%	28.8%	34.1%	34.9%	32.1%	34.9%	32.5%	33.3%	30.5%	32.3%	7.08897e-26	7.08897e-26	7.08897e-26	7.08897e-26	7.08897e-26	7.08897e-26	7.08897e-26	7.08897e-26
Kid. Cortex	Col6a2	CO6A2_MOUSE	Q02788	22	25	20	20	23	19	24	22	23	22	19	24	21	22	22	22	22	21	22	27.4%	27.2%	23.9%	23.9%	25%	22%	28.4%	26.7%	26.1%	26.7%	23.6%	28.7%	25.4%	28%	26.7%	26.7%	25%	25%	25.2%	5.46999e-19	5.46999e-19	5.46999e-19	5.46999e-19	5.46999e-19	5.46999e-19	5.46999e-19	5.46999e-19
Kid. Cortex	Col6a3	E9PWQ3_MOUSE	E9PWQ3	112	111	108	109	106	107	117	117	118	119	106	112	110	115	116	111	115	116	117	42.7%	41.6%	44%	42%	41.7%	41.6%	44%	44.3%	44.5%	44.3%	41.6%	43.2%	43%	44.3%	43.7%	44.4%	45.5%	45.2%	43.5%	7.92117e-32	7.92117e-32	7.92117e-32	7.92117e-32	7.92117e-32	7.92117e-32	7.92117e-32	7.92117e-32
Kid. Cortex	Col6a4	CO6A4_MOUSE	A2AX52	1		1	1	1		1		2	2	2	1	2	2	1		1	2	2	0.3%		0.3%	0.3%	0.3%		0.3%		0.8%	0.8%	0.8%	0.4%	0.8%	0.8%	0.3%		0.4%	0.8%	0.8%	1.59835e-09		1.59835e-09	1.59835e-09	1.59835e-09		1.59835e-09
Kid. Cortex	Col6a5	A0A140T8W1_MOUSE;CO6A5_MOUSE	A0A140T8W1;A6H584	9	7	9	9	9	9	9	11	10	11	10	12	10	11	13	12	8	11	9	5.3%;5.3%	3.9%;3.9%	5.2%;5.2%	5.4%;5.4%	4.7%;4.7%	5.1%;5.1%	5%;5%	5.7%;5.7%	5.6%;5.6%	6.5%;6.5%	5.9%;5.9%	6.4%;6.4%	5.5%;5.5%	6.4%;6.4%	7.2%;7.2%	7.2%;7.2%	4.5%;4.5%	6.1%;6.1%	5.5%;5.5%	1.04758e-25	1.04758e-25	1.04758e-25	1.04758e-25	1.04758e-25	1.04758e-25	1.04758e-25	1.04758e-25
Kid. Cortex	Col6a6	E9Q6A6_MOUSE;CO6A6_MOUSE	E9Q6A6;Q8C6K9	3	2	3	2	2	4	3	5	5	4	4	2	2	3	3	4	5	5	3	1.7%;1.7%	0.8%;0.8%	1.3%;1.3%	1.1%;1.1%	1.1%;1.1%	1.9%;1.9%	1.5%;1.5%	2.8%;2.8%	2.6%;2.6%	1.9%;1.9%	2.4%;2.4%	1.1%;1.1%	1.5%;1.5%	1.9%;1.9%	1.9%;1.9%	2.2%;2.2%	2.5%;2.5%	2.6%;2.6%	1.5%;1.5%	3.93785e-09	3.93785e-09	3.93785e-09	3.93785e-09	3.93785e-09	3.93785e-09	3.93785e-09	3.93785e-09
Kid. Cortex	Col8a1	CO8A1_MOUSE	Q00780		1		1			1	1		2	2	2	2	1	2	2	2	2	2		1.3%		1.3%			1.3%	1.3%		5%	5%	5%	5%	1.3%	5%	5%	5%	5%	5%		1.22332e-07		1.22332e-07			1.22332e-07	1.22332e-07
Kid. Cortex	Col9a1	G3X995_MOUSE;CO9A1_MOUSE	G3X995;Q05722	3		4	3	1	2	4	4	4	5	2	3	3	3	2	3	4	4	3	6%;6%		6.7%;6.7%	6%;6%	2.3%;2.3%	3%;3%	7.4%;7.4%	7.4%;7.4%	7.4%;7.4%	8.8%;8.8%	4.3%;4.3%	5.8%;5.8%	5.8%;5.8%	5.8%;5.8%	4.6%;4.6%	6.6%;6.6%	7.4%;7.4%	7.4%;7.4%	5.3%;5.3%	2.04585e-12		2.04585e-12	2.04585e-12	2.04585e-12	2.04585e-12	2.04585e-12	2.04585e-12
[truncated: 182 more columns]

## Sheet: Kid. Medulla
Organ	PG.Genes	PG.ProteinNames	PG.UniProtIds	Control_AD_1__PG.NrOfStrippedSequencesUsedForQuantification	Control_AD_2__PG.NrOfStrippedSequencesUsedForQuantification	Control_AD_3__PG.NrOfStrippedSequencesUsedForQuantification	Control_AD_4__PG.NrOfStrippedSequencesUsedForQuantification	Control_AD_5__PG.NrOfStrippedSequencesUsedForQuantification	Control_AD_6__PG.NrOfStrippedSequencesUsedForQuantification	Control_ND_1__PG.NrOfStrippedSequencesUsedForQuantification	Control_ND_2__PG.NrOfStrippedSequencesUsedForQuantification	Control_ND_3__PG.NrOfStrippedSequencesUsedForQuantification	Control_ND_4__PG.NrOfStrippedSequencesUsedForQuantification	Control_ND_5__PG.NrOfStrippedSequencesUsedForQuantification	Control_ND_6__PG.NrOfStrippedSequencesUsedForQuantification	Proteinuric_AD_1__PG.NrOfStrippedSequencesUsedForQuantification	Proteinuric_AD_2__PG.NrOfStrippedSequencesUsedForQuantification	Proteinuric_AD_3__PG.NrOfStrippedSequencesUsedForQuantification	Proteinuric_AD_4__PG.NrOfStrippedSequencesUsedForQuantification	Proteinuric_AD_5__PG.NrOfStrippedSequencesUsedForQuantification	Proteinuric_ND_1__PG.NrOfStrippedSequencesUsedForQuantification	Proteinuric_ND_2__PG.NrOfStrippedSequencesUsedForQuantification	Proteinuric_ND_3__PG.NrOfStrippedSequencesUsedForQuantification	Proteinuric_ND_4__PG.NrOfStrippedSequencesUsedForQuantification	Control_AD_1__PG.Coverage	Control_AD_2__PG.Coverage	Control_AD_3__PG.Coverage	Control_AD_4__PG.Coverage	Control_AD_5__PG.Coverage	Control_AD_6__PG.Coverage	Control_ND_1__PG.Coverage	Control_ND_2__PG.Coverage	Control_ND_3__PG.Coverage	Control_ND_4__PG.Coverage	Control_ND_5__PG.Coverage	Control_ND_6__PG.Coverage	Proteinuric_AD_1__PG.Coverage	Proteinuric_AD_2__PG.Coverage	Proteinuric_AD_3__PG.Coverage	Proteinuric_AD_4__PG.Coverage	Proteinuric_AD_5__PG.Coverage	Proteinuric_ND_1__PG.Coverage	Proteinuric_ND_2__PG.Coverage	Proteinuric_ND_3__PG.Coverage	Proteinuric_ND_4__PG.Coverage	Control_AD_1__PG.Pvalue	Control_AD_2__PG.Pvalue	Control_AD_3__PG.Pvalue	Control_AD_4__PG.Pvalue
Kid. Medulla	Col11a2	COBA2_MOUSE	Q64739								2		1				1					1										2.5%		1.6%				1.6%					0.9%
Kid. Medulla	Col12a1	E9PX70_MOUSE;COCA1_MOUSE	E9PX70;Q60847	76	88	68	90	84	96	91	100	99	103	102	96	95	104	107	98	105	98	97	108	105	33.6%;33%	37%;36.4%	29.5%;29%	37.8%;37.1%	35.9%;35.3%	38.1%;37.4%	37.6%;37%	40.7%;40%	40.6%;39.9%	41.5%;40.8%	40.6%;39.9%	38.7%;38%	39.4%;38.7%	42.9%;42.1%	44.1%;43.3%	40.2%;39.5%	43.8%;43%	40.6%;39.8%	39.7%;39%	44.5%;43.7%	41.7%;40.9%	1.5432e-17	1.5432e-17	1.5432e-17	1.5432e-17
Kid. Medulla	Col14a1	B7ZNH7_MOUSE	B7ZNH7	59	58	52	57	59	61	59	57	62	58	57	62	58	64	60	62	65	64	62	63	63	43.1%	41.2%	38.9%	43.4%	45.7%	45.2%	43.7%	40.5%	46.4%	42.1%	42.1%	45.7%	45.1%	47.7%	45.8%	46.8%	48.8%	47.5%	45.8%	47.5%	47.2%	2.0569e-14	2.0569e-14	2.0569e-14	2.0569e-14
Kid. Medulla	Col15a1	A2AJY2_MOUSE;COFA1_MOUSE	A2AJY2;O35206	15	15	16	17	18	16	18	19	17	18	17	18	18	18	19	16	17	18	17	18	17	15.1%;14.9%	15.1%;14.9%	16.1%;15.8%	17.3%;17%	17.9%;17.6%	16.1%;15.8%	18.1%;17.8%	18.7%;18.4%	16.8%;16.5%	17.9%;17.6%	17.3%;17%	18.1%;17.8%	17.9%;17.6%	18.1%;17.8%	18.7%;18.4%	16.4%;16.1%	17.3%;17%	18.1%;17.8%	17.3%;17%	18.1%;17.8%	17.1%;16.8%	4.06527e-09	4.06527e-09	4.06527e-09	4.06527e-09
Kid. Medulla	Col16a1	COGA1_MOUSE	Q8BLX7				1	1	1	1	5	2	3	1	1	1			1	2	1		2	1				0.8%	0.8%	0.8%	0.8%	4.9%	1.6%	1.9%	0.8%	0.8%	0.8%			0.6%	1.4%	0.8%		1.6%	0.8%				0.000469099
Kid. Medulla	Col18a1	A0A1W2P6N8_MOUSE	A0A1W2P6N8	1	1	1	1		1	1	1	1	1	1	1		1	1	1		1	1	1	1	10.7%	10.7%	10.7%	10.7%		10.7%	10.7%	10.7%	10.7%	10.7%	10.7%	10.7%		10.7%	10.7%	10.7%		10.7%	10.7%	10.7%	10.7%	1.79737e-09	1.79737e-09	1.79737e-09	1.79737e-09
Kid. Medulla	Col18a1	E9QPX1_MOUSE;COIA1_MOUSE	E9QPX1;P39061	26	28	26	24	23	27	26	28	29	29	29	25	27	28	25	28	27	27	28	29	28	17.9%;17.9%	19.6%;19.6%	17.9%;17.9%	17.2%;17.2%	15.2%;15.2%	19.7%;19.7%	18.9%;18.9%	19.4%;19.4%	20.1%;20.1%	20.5%;20.5%	21.4%;21.4%	16.5%;16.5%	20.2%;20.2%	20.3%;20.3%	18.3%;18.3%	21%;21%	21%;21%	19.7%;19.7%	20.2%;20.2%	21.4%;21.4%	20.2%;20.2%	2.48932e-11	2.48932e-11	2.48932e-11	2.48932e-11
Kid. Medulla	Col1a1	CO1A1_MOUSE	P11087	13	15	11	14	14	16	19	21	18	18	24	16	15	16	14	12	19	17	16	15	17	11.1%	14.2%	9.6%	15.7%	12.1%	15.2%	20.2%	21.7%	18.3%	17.3%	23.1%	16%	12%	14.1%	11.2%	11.4%	16.5%	15.3%	14.2%	13.2%	17.2%	7.09606e-11	7.09606e-11	7.09606e-11	7.09606e-11
Kid. Medulla	Col1a2	CO1A2_MOUSE	Q01149	18	19	16	19	18	20	20	25	22	22	23	23	20	21	20	21	24	19	18	20	21	20.2%	19.4%	17.6%	21.6%	19%	20%	20%	26.8%	23.7%	24.3%	23.2%	25.5%	20.8%	21.8%	20.8%	21.8%	25.5%	18.9%	18.2%	19.5%	22.5%	7.97325e-10	7.97325e-10	7.97325e-10	7.97325e-10
Kid. Medulla	Col26a1	COQA1_MOUSE	Q91VF6				1	1	1	2	2	1	2	1	1			1			1		1	1				3%	3%	3%	9.3%	9.3%	3%	9.3%	3%	3%			3%			3%		3%	3%				1.90556e-08
Kid. Medulla	Col28a1	COSA1_MOUSE	Q2UY11	3	6	2	2	4	2	3	5	6	2	3	3	5	5	5	4	6	5	3	2	6	2.9%	7%	1.4%	1.4%	4.5%	1.4%	2.5%	5.5%	7%	1.4%	3.3%	2.5%	5.5%	5.1%	5.5%	4.8%	7%	6.2%	3.3%	1.4%	7%	3.16406e-05	3.16406e-05	3.16406e-05	3.16406e-05
Kid. Medulla	Col2a1	CO2A1_MOUSE	P28481	1	3	2	1	2	2	2	2	2	2	3	2	2	2	2	3	3	2	3	2	2	2.7%	4.8%	3.8%	2.7%	3.8%	3.8%	3.8%	3.6%	3.8%	3.8%	4.8%	3.8%	3.8%	3.8%	3.8%	4.8%	4.8%	3.8%	4.8%	3.8%	3.8%	1.32111e-08	1.32111e-08	1.32111e-08	1.32111e-08
Kid. Medulla	Col3a1	CO3A1_MOUSE	P08121	5	8	6	5	7	9	13	14	9	11	11	10	8	11	6	9	13	6	8	10	11	3.8%	6.4%	4.8%	4.4%	5.3%	5.7%	9.6%	10.1%	5.6%	7.4%	8.1%	7%	6.6%	6.6%	4.8%	6.1%	8.3%	4.7%	6.5%	8.3%	6.6%	2.03421e-08	2.03421e-08	2.03421e-08	2.03421e-08
Kid. Medulla	Col4a1	CO4A1_MOUSE	P02463	9	10	8	8	11	9	12	11	10	11	11	10	7	9	8	9	9	9	9	9	9	7.1%	8.1%	7%	7%	10.5%	8.2%	9.8%	8.9%	8.3%	8.7%	8.8%	8.8%	6.2%	8.1%	6.8%	8%	8%	8%	7.8%	8%	6.8%	8.63782e-11	8.63782e-11	8.63782e-11	8.63782e-11
Kid. Medulla	Col4a2	CO4A2_MOUSE	P08122	17	18	18	18	17	17	21	20	20	21	20	18	14	18	16	16	17	20	15	18	20	13.6%	14.4%	14.9%	15.5%	14.9%	15.4%	16.8%	16.8%	16.8%	18.2%	16.8%	14.9%	12.2%	15.6%	14.2%	14.2%	14.9%	18.2%	13.1%	16.9%	17.1%	1.89396e-10	1.89396e-10	1.89396e-10	1.89396e-10
Kid. Medulla	Col4a3	CO4A3_MOUSE	Q9QZS0	6	4	5	5	3	5	6	7	7	7	6	6	3	5	4	3	3	4	2	6	4	5.5%	4.3%	4.9%	5.5%	2.4%	4.9%	5.5%	6.1%	6.1%	6.1%	6.1%	6.1%	2.4%	4.9%	4.2%	2.4%	2.4%	3.6%	1.9%	6.1%	3.6%	4.36858e-12	4.36858e-12	4.36858e-12	4.36858e-12
Kid. Medulla	Col4a4	CO4A4_MOUSE	Q9QZR9	4	4	6	4	6	5	7	6	6	7	6	6	2	5	2	5	4	4	3	5	3	3.5%	4.5%	6%	4.5%	6%	5.2%	8%	6%	6%	8%	6%	6%	2.1%	5.2%	1.8%	5.2%	3.4%	3.4%	2.6%	5.2%	2.7%	1.32919e-10	1.32919e-10	1.32919e-10	1.32919e-10
Kid. Medulla	Col4a5	F7CK55_MOUSE;Q63ZW6_MOUSE	F7CK55;Q63ZW6	4	4	3	4	5	6	7	7	5	6	6	6	3	5	4	4	4	5	4	5	5	5.4%;2.5%	5.4%;2.5%	3.9%;1.8%	6.2%;3%	7.8%;3.7%	9.2%;4.4%	11.8%;5.6%	11.8%;5.6%	7.9%;3.7%	8.8%;4.1%	9.2%;4.4%	9.2%;4.4%	5.4%;2.5%	7.9%;3.7%	5.4%;2.5%	5.4%;2.5%	5.4%;2.5%	7.8%;3.7%	5.4%;2.5%	6.9%;3.3%	6.9%;3.3%	1.26005e-12	1.26005e-12	1.26005e-12	1.26005e-12
Kid. Medulla	Col4a6	B1AVK5_MOUSE	B1AVK5	3	5	3	3	2	3	4	6	5	5	3	4	2	4	2	4	1	3	2	3	4	2.8%	4.1%	1.8%	2.7%	1.3%	2.7%	3.5%	4.7%	4.1%	4.1%	2.8%	3.4%	1.3%	3.4%	1.3%	3.5%	0.5%	2%	1.2%	2.7%	3.4%	2.6069e-06	2.6069e-06	2.6069e-06	2.6069e-06
Kid. Medulla	Col5a1	A0A5F8MQ70_MOUSE	A0A5F8MQ70								2	2	1	2		1	1		1	2	2	2	2	2								11.8%	11.8%	8%	11.8%		3.8%	3.8%		3.8%	11.8%	11.8%	11.8%	11.8%	11.8%
Kid. Medulla	Col5a1	CO5A1_MOUSE	O88207	9	11	8	10	8	11	9	12	11	11	12	10	12	12	12	13	13	11	11	12	12	6.6%	9.1%	7%	9.2%	6.6%	9.1%	8.2%	10.2%	9.2%	9.2%	10.2%	7.7%	10.2%	10.2%	10.2%	10.2%	10.2%	9.1%	9.7%	10.2%	10.2%	1.06001e-06	1.06001e-06	1.06001e-06	1.06001e-06
Kid. Medulla	Col5a2	CO5A2_MOUSE	Q3U962	3	5	6	4	5	4	4	5	5	5	6	4	6	4	4	6	7	4	4	4	6	2.9%	5.3%	6.3%	3.7%	4.5%	3.9%	3.7%	5.3%	5.3%	4.5%	6.1%	3.7%	6.3%	4.5%	3.9%	6.3%	7.1%	3.9%	4.5%	3.7%	5.5%	2.24509e-07	2.24509e-07	2.24509e-07	2.24509e-07
Kid. Medulla	Col5a3	Q9JLI2_MOUSE	Q9JLI2	1	2	2	3	2	2	2	2	2	1	1	2	1	2	2	1	1	3	2	3	3	0.6%	1.7%	1.7%	2.4%	1.7%	1.7%	1.7%	1.7%	1.7%	0.6%	0.6%	1.7%	0.6%	1.3%	1.7%	0.6%	0.6%	2.1%	1.7%	2.1%	2.4%	2.58251e-05	2.58251e-05	2.58251e-05	2.58251e-05
Kid. Medulla	Col6a1	CO6A1_MOUSE	Q04857	31	32	28	28	27	33	27	33	34	32	33	30	23	29	26	30	33	29	32	33	35	32.2%	34%	34%	32.5%	32.2%	38.1%	32.5%	38.1%	35.6%	31.7%	38%	36%	29.2%	31.6%	30.3%	33.7%	38.7%	31.5%	36.1%	36.9%	39.1%	1.7517e-14	1.7517e-14	1.7517e-14	1.7517e-14
Kid. Medulla	Col6a2	CO6A2_MOUSE	Q02788	22	24	20	21	23	24	19	23	23	23	24	24	20	23	23	23	25	23	24	25	25	26.3%	28.5%	23.3%	30%	28.7%	34%	22.8%	29.1%	26.3%	28.2%	29.3%	31.9%	25%	28.8%	27.3%	28.7%	32.1%	28.3%	27.1%	32.9%	32.9%	1.07332e-10	1.07332e-10	1.07332e-10	1.07332e-10
Kid. Medulla	Col6a2	D3Z7D5_MOUSE	D3Z7D5	1	1		1	1	1	1			1			1	1		1	1			1	1	1.2%	1.2%		1.2%	1.2%	1.2%	1.2%			1.2%			1.2%	1.2%		1.2%	1.2%			1.2%	1.2%	0.000473285	0.000473285		0.000473285
Kid. Medulla	Col6a3	A0A087WS16_MOUSE;J3QQ16_MOUSE	A0A087WS16;J3QQ16					1						1		1		1						1					0.4%;0.4%						0.4%;0.4%		0.4%;0.4%		0.4%;0.4%						0.4%;0.4%
Kid. Medulla	Col6a3	E9PWQ3_MOUSE	E9PWQ3	123	129	109	122	119	122	119	131	132	130	136	126	125	128	126	129	136	128	121	136	135	47.8%	49.4%	43.3%	46.9%	47.1%	47.9%	47.6%	50.1%	50.5%	50.3%	50.5%	49.1%	48%	49.3%	49.8%	49.6%	51%	50.3%	48.2%	50.6%	50.8%	8.47201e-13	8.47201e-13	8.47201e-13	8.47201e-13
Kid. Medulla	Col6a4	CO6A4_MOUSE	A2AX52	14	8	2	22	14	23	5	25	17	17	15	16	10	10	14	27	24	11	4	18	23	9%	5.7%	1.5%	13.5%	8.8%	14.1%	2.8%	14.4%	11.3%	10.7%	8.4%	10.4%	6.1%	6.2%	8.1%	16.8%	14.7%	6.9%	2%	11.3%	14%	6.08424e-14	6.08424e-14	6.08424e-14	6.08424e-14
Kid. Medulla	Col6a5	A0A140T8W1_MOUSE;CO6A5_MOUSE	A0A140T8W1;A6H584	14	27	6	41	20	14	43	24	22	12	24	45	27	22	32	17	62	32	11	22	24	7%;7%	14.9%;14.9%	3.6%;3.6%	23.2%;23.2%	11.3%;11.3%	8.1%;8.1%	22.9%;22.9%	13.8%;13.8%	12.2%;12.2%	6.4%;6.4%	12.6%;12.6%	23.6%;23.6%	15%;15%	11.2%;11.2%	16.9%;16.9%	9.5%;9.5%	28.6%;28.6%	15.8%;15.8%	6.2%;6.2%	10.6%;10.6%	13.6%;13.6%	9.83752e-10	9.83752e-10	9.83752e-10	9.83752e-10
Kid. Medulla	Col6a6	E9Q6A6_MOUSE;CO6A6_MOUSE	E9Q6A6;Q8C6K9	14	30	7	32	24	16	35	31	32	18	26	39	17	22	26	21	44	20	9	15	22	8.5%;8.5%	20.3%;20.3%	3.9%;3.9%	21%;21%	16.6%;16.6%	10.7%;10.7%	21.7%;21.7%	20.8%;20.8%	21%;21%	11.4%;11.4%	16.6%;16.6%	26.2%;26.2%	10.6%;10.6%	14.5%;14.5%	16.2%;16.2%	14.6%;14.6%	28.2%;28.2%	12.4%;12.4%	6.1%;6.1%	8.8%;8.8%	14.7%;14.7%	5.96522e-10	5.96522e-10	5.96522e-10	5.96522e-10
Kid. Medulla	Col7a1	CO7A1_MOUSE	Q63870	3	12	1	3	2	4	2	16	7	13	9	9	5	6	3	5	6	2	3	8	12	1.5%	5.6%	0.3%	1.3%	0.6%	1.7%	0.5%	7.5%	3.1%	5.7%	4.1%	4.2%	2.1%	2.3%	1.3%	1.9%	2.7%	0.5%	1.4%	3.3%	5.4%	7.83982e-08	7.83982e-08	7.83982e-08	7.83982e-08
Kid. Medulla	Col8a1	CO8A1_MOUSE	Q00780		1	1	3		1	3	3	2		2	2	2	3	2	2	2	2		3	2		1.7%	1.7%	4.3%		1.7%	6.7%	6.7%	3%		3.1%	3.1%	3.1%	6.7%	3.1%	3.1%	5%	3.1%		4.3%	3.1%		7.22995e-09	7.22995e-09	7.22995e-09
Kid. Medulla	Col9a1	G3X995_MOUSE;CO9A1_MOUSE	G3X995;Q05722	1								1			1	1	1		1	1	1		1		2.9%;2.9%								2.9%;2.9%			2.9%;2.9%	2.3%;2.3%	2.9%;2.9%		2.3%;2.3%	2.9%;2.9%	2.9%;2.9%		2.9%;2.9%		0.00347842
[truncated: 206 more columns]
