# Supplementary material for: Diversion of Arginine’s dietary metabolic fate in proteinuric kidney disease
Source: Research Square preprint supplement (doi:10.21203/rs.3.rs-9927381/v1), 2026-06-17
Supplement: Supplementary file 28 [file f582550d2826b3449c7b95f5.xlsx]

## Sheet: Sheet1
Genes	Protein.Group	Protein.Ids	Samples	Values	MouseID
Aspg	A0JNU3	A0JNU3	F:\Yifan\20230908_singletubule_raw\230901_st_93_E8.raw	664.727	Control_1
Aspg	A0JNU3	A0JNU3	F:\Yifan\20230908_singletubule_raw\230901_st_93_G10.raw	2861.34	Control_1
Aspg	A0JNU3	A0JNU3	F:\Yifan\20230908_singletubule_raw\230901_st_93_G11.raw		Control_1
Aspg	A0JNU3	A0JNU3	F:\Yifan\20230908_singletubule_raw\230901_st_93_H10.raw		Control_1
Aspg	A0JNU3	A0JNU3	F:\Yifan\20230908_singletubule_raw\230901_st_93_H12.raw	714.528	Control_1
Aspg	A0JNU3	A0JNU3	F:\Yifan\20230908_singletubule_raw\230901_st_93_H3.raw	1604.45	Control_1
Aspg	A0JNU3	A0JNU3	F:\Yifan\20230908_singletubule_raw\230901_st_93_B6.raw		Control_1
Aspg	A0JNU3	A0JNU3	F:\Yifan\20230908_singletubule_raw\230901_st_93_H11.raw	988.082	Control_1
Aspg	A0JNU3	A0JNU3	F:\Yifan\20230908_singletubule_raw\230901_st_93_E6.raw		Control_1
Aspg	A0JNU3	A0JNU3	F:\Yifan\20230908_singletubule_raw\230901_st_93_E7.raw	1584.83	Control_1
Aspg	A0JNU3	A0JNU3	F:\Yifan\20230908_singletubule_raw\230901_st_93_G9.raw		Control_1
Aspg	A0JNU3	A0JNU3	F:\Yifan\20230908_singletubule_raw\230901_st_93_F10.raw	2313.81	Control_1
Aspg	A0JNU3	A0JNU3	F:\Yifan\20230908_singletubule_raw\230901_st_93_E9.raw		Control_1
Aspg	A0JNU3	A0JNU3	F:\Yifan\20230908_singletubule_raw\230901_st_93_D10.raw		Control_1
Aspg	A0JNU3	A0JNU3	F:\Yifan\20230908_singletubule_raw\230901_st_93_F9.raw		Control_1
Aspg	A0JNU3	A0JNU3	F:\Yifan\20230908_singletubule_raw\230901_st_93_G7.raw		Control_1
Aspg	A0JNU3	A0JNU3	F:\Yifan\20230908_singletubule_raw\230901_st_93_A9.raw		Control_1
Aspg	A0JNU3	A0JNU3	F:\Yifan\20230908_singletubule_raw\230901_st_93_E3.raw		Control_1
Aspg	A0JNU3	A0JNU3	F:\Yifan\20230908_singletubule_raw\230901_st_93_C7.raw		Control_1
Aspg	A0JNU3	A0JNU3	F:\Yifan\20230908_singletubule_raw\230901_st_93_G4.raw		Control_1
Aspg	A0JNU3	A0JNU3	F:\Yifan\20230908_singletubule_raw\230901_st_93_D3.raw		Control_1
Aspg	A0JNU3	A0JNU3	F:\Yifan\20230908_singletubule_raw\230901_st_93_F2.raw	10837	Control_1
Aspg	A0JNU3	A0JNU3	F:\Yifan\20230908_singletubule_raw\230901_st_93_G8.raw		Control_1
Aspg	A0JNU3	A0JNU3	F:\Yifan\20230908_singletubule_raw\230901_st_93_H4.raw		Control_1
Aspg	A0JNU3	A0JNU3	F:\Yifan\20230908_singletubule_raw\230901_st_93_D6.raw		Control_1
Aspg	A0JNU3	A0JNU3	F:\Yifan\20230908_singletubule_raw\230901_st_93_D4.raw		Control_1
Aspg	A0JNU3	A0JNU3	F:\Yifan\20230908_singletubule_raw\230901_st_93_F12.raw		Control_1
Aspg	A0JNU3	A0JNU3	F:\Yifan\20230908_singletubule_raw\230901_st_93_C9.raw	1996.44	Control_1
Aspg	A0JNU3	A0JNU3	F:\Yifan\20230908_singletubule_raw\230901_st_93_G12.raw		Control_1
Aspg	A0JNU3	A0JNU3	F:\Yifan\20230908_singletubule_raw\230901_st_93_B10.raw		Control_1
Aspg	A0JNU3	A0JNU3	F:\Yifan\20230908_singletubule_raw\230901_st_93_B11.raw		Control_1
Aspg	A0JNU3	A0JNU3	F:\Yifan\20230908_singletubule_raw\230901_st_93_E11.raw		Control_1
Aspg	A0JNU3	A0JNU3	F:\Yifan\20230908_singletubule_raw\230901_st_93_B12.raw		Control_1
Aspg	A0JNU3	A0JNU3	F:\Yifan\20230908_singletubule_raw\230901_st_93_F3.raw	6461.53	Control_1
Aspg	A0JNU3	A0JNU3	F:\Yifan\20230908_singletubule_raw\230901_st_93_B4.raw		Control_1
Aspg	A0JNU3	A0JNU3	F:\Yifan\20230908_singletubule_raw\230901_st_93_C11.raw		Control_1
Aspg	A0JNU3	A0JNU3	F:\Yifan\20230908_singletubule_raw\230901_st_93_B2.raw		Control_1
Aspg	A0JNU3	A0JNU3	F:\Yifan\20230908_singletubule_raw\230901_st_93_H9.raw		Control_1
Aspg	A0JNU3	A0JNU3	F:\Yifan\20230908_singletubule_raw\230901_st_93_F1.raw		Control_1
Aspg	A0JNU3	A0JNU3	F:\Yifan\20230908_singletubule_raw\230901_st_93_C12.raw		Control_1
Aspg	A0JNU3	A0JNU3	F:\Yifan\20230908_singletubule_raw\230901_st_93_D2.raw		Control_1
Aspg	A0JNU3	A0JNU3	F:\Yifan\20230908_singletubule_raw\230901_st_93_H2.raw		Control_1
Aspg	A0JNU3	A0JNU3	F:\Yifan\20230908_singletubule_raw\230901_st_93_A11.raw		Control_1
Aspg	A0JNU3	A0JNU3	F:\Yifan\20230908_singletubule_raw\230901_st_93_D1.raw		Control_1
Aspg	A0JNU3	A0JNU3	F:\Yifan\20230908_singletubule_raw\230901_st_93_F7.raw		Control_1
Aspg	A0JNU3	A0JNU3	F:\Yifan\20230908_singletubule_raw\230901_st_93_E4.raw		Control_1
Aspg	A0JNU3	A0JNU3	F:\Yifan\20230908_singletubule_raw\230901_st_93_F6.raw		Control_1
Aspg	A0JNU3	A0JNU3	F:\Yifan\20230908_singletubule_raw\230901_st_93_G2.raw		Control_1
Aspg	A0JNU3	A0JNU3	F:\Yifan\20230908_singletubule_raw\230901_st_93_C10.raw	3663.88	Control_1
Aspg	A0JNU3	A0JNU3	F:\Yifan\20230908_singletubule_raw\230901_st_93_E12.raw		Control_1
Aspg	A0JNU3	A0JNU3	F:\Yifan\20230908_singletubule_raw\230901_st_93_D12.raw		Control_1
Aspg	A0JNU3	A0JNU3	F:\Yifan\20230908_singletubule_raw\230901_st_93_H1.raw		Control_1
Aspg	A0JNU3	A0JNU3	F:\Yifan\20230908_singletubule_raw\230901_st_93_C4.raw		Control_1
Aspg	A0JNU3	A0JNU3	F:\Yifan\20230908_singletubule_raw\230901_st_93_A10.raw		Control_1
Aspg	A0JNU3	A0JNU3	F:\Yifan\20230908_singletubule_raw\230901_st_93_B9.raw		Control_1
Aspg	A0JNU3	A0JNU3	F:\Yifan\20230908_singletubule_raw\230901_st_93_D8.raw		Control_1
Aspg	A0JNU3	A0JNU3	F:\Yifan\20230908_singletubule_raw\230901_st_93_B1.raw		Control_1
Aspg	A0JNU3	A0JNU3	F:\Yifan\20230908_singletubule_raw\230901_st_93_A12.raw		Control_1
Aspg	A0JNU3	A0JNU3	F:\Yifan\20230908_singletubule_raw\230901_st_93_C1.raw	11023.2	Control_1
Aspg	A0JNU3	A0JNU3	F:\Yifan\20230908_singletubule_raw\230901_st_93_E10.raw		Control_1
Aspg	A0JNU3	A0JNU3	F:\Yifan\20230908_singletubule_raw\230901_st_93_E2.raw		Control_1
Aspg	A0JNU3	A0JNU3	F:\Yifan\20230908_singletubule_raw\230901_st_93_H7.raw		Control_1
Aspg	A0JNU3	A0JNU3	F:\Yifan\20230908_singletubule_raw\230901_st_93_F4.raw		Control_1
Aspg	A0JNU3	A0JNU3	F:\Yifan\20230908_singletubule_raw\230901_st_93_H8.raw		Control_1
Aspg	A0JNU3	A0JNU3	F:\Yifan\20230908_singletubule_raw\230901_st_93_D11.raw		Control_1
Aspg	A0JNU3	A0JNU3	F:\Yifan\20230908_singletubule_raw\230901_st_93_C3.raw		Control_1
Aspg	A0JNU3	A0JNU3	F:\Yifan\20230908_singletubule_raw\230901_st_93_D9.raw		Control_1
Aspg	A0JNU3	A0JNU3	F:\Yifan\20230908_singletubule_raw\230901_st_93_F11.raw		Control_1
Aspg	A0JNU3	A0JNU3	F:\Yifan\20230908_singletubule_raw\230901_st_93_B7.raw		Control_1
Aspg	A0JNU3	A0JNU3	F:\Yifan\20230908_singletubule_raw\230901_st_93_F8.raw		Control_1
Aspg	A0JNU3	A0JNU3	F:\Yifan\20230908_singletubule_raw\230901_st_93_C8.raw		Control_1
Aspg	A0JNU3	A0JNU3	F:\Yifan\20230908_singletubule_raw\230901_st_93_A8.raw		Control_1
Aspg	A0JNU3	A0JNU3	F:\Yifan\20230908_singletubule_raw\230901_st_93_G3.raw		Control_1
Aspg	A0JNU3	A0JNU3	F:\Yifan\20230908_singletubule_raw\230901_st_93_E1.raw		Control_1
Aspg	A0JNU3	A0JNU3	F:\Yifan\20230908_singletubule_raw\230901_st_93_C2.raw		Control_1
Aspg	A0JNU3	A0JNU3	F:\Yifan\20230908_singletubule_raw\230901_st_93_B3.raw		Control_1
Aspg	A0JNU3	A0JNU3	F:\Yifan\20230908_singletubule_raw\230901_st_93_A7.raw		Control_1
Aspg	A0JNU3	A0JNU3	F:\Yifan\20230908_singletubule_raw\230901_st_93_G6.raw	12020.1	Control_1
Aspg	A0JNU3	A0JNU3	F:\Yifan\20230908_singletubule_raw\230901_st_93_D7.raw		Control_1
Aspg	A0JNU3	A0JNU3	F:\Yifan\20230908_singletubule_raw\230901_st_93_G1.raw		Control_1
Aspg	A0JNU3	A0JNU3	F:\Yifan\20230908_singletubule_raw\230901_st_93_H6.raw		Control_1
Aspg	A0JNU3	A0JNU3	F:\Yifan\20230908_singletubule_raw\230901_st_93_A4.raw		Control_1
Aspg	A0JNU3	A0JNU3	F:\Yifan\20230908_singletubule_raw\230901_st_93_B8.raw		Control_1
Aspg	A0JNU3	A0JNU3	F:\Yifan\20230908_singletubule_raw\230901_st_93_A3.raw		Control_1
Aspg	A0JNU3	A0JNU3	F:\Yifan\20230908_singletubule_raw\230901_st_93_A1.raw		Control_1
Aspg	A0JNU3	A0JNU3	F:\Yifan\20230908_singletubule_raw\230901_st_93_A2.raw		Control_1
Aspg	A0JNU3	A0JNU3	F:\Yifan\20230908_singletubule_raw\230901_st_93_A6.raw		Control_1
Cul4b	A2A432	A2A432	F:\Yifan\20230908_singletubule_raw\230901_st_93_E8.raw	35630.3	Control_1
Cul4b	A2A432	A2A432	F:\Yifan\20230908_singletubule_raw\230901_st_93_G10.raw	34337.7	Control_1
Cul4b	A2A432	A2A432	F:\Yifan\20230908_singletubule_raw\230901_st_93_G11.raw	16482.3	Control_1
Cul4b	A2A432	A2A432	F:\Yifan\20230908_singletubule_raw\230901_st_93_H10.raw	36702	Control_1
Cul4b	A2A432	A2A432	F:\Yifan\20230908_singletubule_raw\230901_st_93_H12.raw	34003.9	Control_1
Cul4b	A2A432	A2A432	F:\Yifan\20230908_singletubule_raw\230901_st_93_H3.raw	44377.1	Control_1
Cul4b	A2A432	A2A432	F:\Yifan\20230908_singletubule_raw\230901_st_93_B6.raw	27218.4	Control_1
Cul4b	A2A432	A2A432	F:\Yifan\20230908_singletubule_raw\230901_st_93_H11.raw	23315.7	Control_1
Cul4b	A2A432	A2A432	F:\Yifan\20230908_singletubule_raw\230901_st_93_E6.raw	17995.4	Control_1
Cul4b	A2A432	A2A432	F:\Yifan\20230908_singletubule_raw\230901_st_93_E7.raw		Control_1
Cul4b	A2A432	A2A432	F:\Yifan\20230908_singletubule_raw\230901_st_93_G9.raw	43119.4	Control_1
Cul4b	A2A432	A2A432	F:\Yifan\20230908_singletubule_raw\230901_st_93_F10.raw		Control_1
Cul4b	A2A432	A2A432	F:\Yifan\20230908_singletubule_raw\230901_st_93_E9.raw	20832.3	Control_1
Cul4b	A2A432	A2A432	F:\Yifan\20230908_singletubule_raw\230901_st_93_D10.raw	24862	Control_1
Cul4b	A2A432	A2A432	F:\Yifan\20230908_singletubule_raw\230901_st_93_F9.raw	58888	Control_1
Cul4b	A2A432	A2A432	F:\Yifan\20230908_singletubule_raw\230901_st_93_G7.raw	17595.6	Control_1
Cul4b	A2A432	A2A432	F:\Yifan\20230908_singletubule_raw\230901_st_93_A9.raw	34518.1	Control_1
Cul4b	A2A432	A2A432	F:\Yifan\20230908_singletubule_raw\230901_st_93_E3.raw	43362.2	Control_1
Cul4b	A2A432	A2A432	F:\Yifan\20230908_singletubule_raw\230901_st_93_C7.raw	27235.2	Control_1
Cul4b	A2A432	A2A432	F:\Yifan\20230908_singletubule_raw\230901_st_93_G4.raw	27556.8	Control_1
Cul4b	A2A432	A2A432	F:\Yifan\20230908_singletubule_raw\230901_st_93_D3.raw	12282.2	Control_1
Cul4b	A2A432	A2A432	F:\Yifan\20230908_singletubule_raw\230901_st_93_F2.raw	29289	Control_1
Cul4b	A2A432	A2A432	F:\Yifan\20230908_singletubule_raw\230901_st_93_G8.raw	46227	Control_1
Cul4b	A2A432	A2A432	F:\Yifan\20230908_singletubule_raw\230901_st_93_H4.raw	30933.2	Control_1
Cul4b	A2A432	A2A432	F:\Yifan\20230908_singletubule_raw\230901_st_93_D6.raw	11326.7	Control_1
Cul4b	A2A432	A2A432	F:\Yifan\20230908_singletubule_raw\230901_st_93_D4.raw	33459.4	Control_1
Cul4b	A2A432	A2A432	F:\Yifan\20230908_singletubule_raw\230901_st_93_F12.raw	47807.2	Control_1
Cul4b	A2A432	A2A432	F:\Yifan\20230908_singletubule_raw\230901_st_93_C9.raw	8722.26	Control_1
Cul4b	A2A432	A2A432	F:\Yifan\20230908_singletubule_raw\230901_st_93_G12.raw	13154.2	Control_1
Cul4b	A2A432	A2A432	F:\Yifan\20230908_singletubule_raw\230901_st_93_B10.raw	7027.37	Control_1
Cul4b	A2A432	A2A432	F:\Yifan\20230908_singletubule_raw\230901_st_93_B11.raw	35494.4	Control_1
Cul4b	A2A432	A2A432	F:\Yifan\20230908_singletubule_raw\230901_st_93_E11.raw	43051	Control_1
Cul4b	A2A432	A2A432	F:\Yifan\20230908_singletubule_raw\230901_st_93_B12.raw	28673.9	Control_1
Cul4b	A2A432	A2A432	F:\Yifan\20230908_singletubule_raw\230901_st_93_F3.raw	48055.3	Control_1
Cul4b	A2A432	A2A432	F:\Yifan\20230908_singletubule_raw\230901_st_93_B4.raw		Control_1
Cul4b	A2A432	A2A432	F:\Yifan\20230908_singletubule_raw\230901_st_93_C11.raw		Control_1
Cul4b	A2A432	A2A432	F:\Yifan\20230908_singletubule_raw\230901_st_93_B2.raw	18874.9	Control_1
Cul4b	A2A432	A2A432	F:\Yifan\20230908_singletubule_raw\230901_st_93_H9.raw		Control_1
Cul4b	A2A432	A2A432	F:\Yifan\20230908_singletubule_raw\230901_st_93_F1.raw	41755.3	Control_1
Cul4b	A2A432	A2A432	F:\Yifan\20230908_singletubule_raw\230901_st_93_C12.raw	42245.4	Control_1
Cul4b	A2A432	A2A432	F:\Yifan\20230908_singletubule_raw\230901_st_93_D2.raw	31843.2	Control_1
Cul4b	A2A432	A2A432	F:\Yifan\20230908_singletubule_raw\230901_st_93_H2.raw	35785.2	Control_1
Cul4b	A2A432	A2A432	F:\Yifan\20230908_singletubule_raw\230901_st_93_A11.raw	32005.1	Control_1
Cul4b	A2A432	A2A432	F:\Yifan\20230908_singletubule_raw\230901_st_93_D1.raw		Control_1
Cul4b	A2A432	A2A432	F:\Yifan\20230908_singletubule_raw\230901_st_93_F7.raw	36888.7	Control_1
Cul4b	A2A432	A2A432	F:\Yifan\20230908_singletubule_raw\230901_st_93_E4.raw	33966.7	Control_1
Cul4b	A2A432	A2A432	F:\Yifan\20230908_singletubule_raw\230901_st_93_F6.raw		Control_1
Cul4b	A2A432	A2A432	F:\Yifan\20230908_singletubule_raw\230901_st_93_G2.raw	38242	Control_1
Cul4b	A2A432	A2A432	F:\Yifan\20230908_singletubule_raw\230901_st_93_C10.raw	34686.5	Control_1
Cul4b	A2A432	A2A432	F:\Yifan\20230908_singletubule_raw\230901_st_93_E12.raw	23899.6	Control_1
Cul4b	A2A432	A2A432	F:\Yifan\20230908_singletubule_raw\230901_st_93_D12.raw	50947.4	Control_1
Cul4b	A2A432	A2A432	F:\Yifan\20230908_singletubule_raw\230901_st_93_H1.raw	32229.5	Control_1
Cul4b	A2A432	A2A432	F:\Yifan\20230908_singletubule_raw\230901_st_93_C4.raw		Control_1
Cul4b	A2A432	A2A432	F:\Yifan\20230908_singletubule_raw\230901_st_93_A10.raw	31765.2	Control_1
Cul4b	A2A432	A2A432	F:\Yifan\20230908_singletubule_raw\230901_st_93_B9.raw	32318	Control_1
Cul4b	A2A432	A2A432	F:\Yifan\20230908_singletubule_raw\230901_st_93_D8.raw	25104	Control_1
Cul4b	A2A432	A2A432	F:\Yifan\20230908_singletubule_raw\230901_st_93_B1.raw	23266.2	Control_1
Cul4b	A2A432	A2A432	F:\Yifan\20230908_singletubule_raw\230901_st_93_A12.raw	10480.7	Control_1
Cul4b	A2A432	A2A432	F:\Yifan\20230908_singletubule_raw\230901_st_93_C1.raw		Control_1
Cul4b	A2A432	A2A432	F:\Yifan\20230908_singletubule_raw\230901_st_93_E10.raw	22512.2	Control_1
Cul4b	A2A432	A2A432	F:\Yifan\20230908_singletubule_raw\230901_st_93_E2.raw	47003.2	Control_1
Cul4b	A2A432	A2A432	F:\Yifan\20230908_singletubule_raw\230901_st_93_H7.raw		Control_1
Cul4b	A2A432	A2A432	F:\Yifan\20230908_singletubule_raw\230901_st_93_F4.raw	5071.45	Control_1
Cul4b	A2A432	A2A432	F:\Yifan\20230908_singletubule_raw\230901_st_93_H8.raw		Control_1
Cul4b	A2A432	A2A432	F:\Yifan\20230908_singletubule_raw\230901_st_93_D11.raw		Control_1
Cul4b	A2A432	A2A432	F:\Yifan\20230908_singletubule_raw\230901_st_93_C3.raw	18915.3	Control_1
Cul4b	A2A432	A2A432	F:\Yifan\20230908_singletubule_raw\230901_st_93_D9.raw	29317.8	Control_1
Cul4b	A2A432	A2A432	F:\Yifan\20230908_singletubule_raw\230901_st_93_F11.raw	42900.8	Control_1
Cul4b	A2A432	A2A432	F:\Yifan\20230908_singletubule_raw\230901_st_93_B7.raw		Control_1
Cul4b	A2A432	A2A432	F:\Yifan\20230908_singletubule_raw\230901_st_93_F8.raw		Control_1
Cul4b	A2A432	A2A432	F:\Yifan\20230908_singletubule_raw\230901_st_93_C8.raw		Control_1
Cul4b	A2A432	A2A432	F:\Yifan\20230908_singletubule_raw\230901_st_93_A8.raw		Control_1
Cul4b	A2A432	A2A432	F:\Yifan\20230908_singletubule_raw\230901_st_93_G3.raw		Control_1
Cul4b	A2A432	A2A432	F:\Yifan\20230908_singletubule_raw\230901_st_93_E1.raw	24020	Control_1
Cul4b	A2A432	A2A432	F:\Yifan\20230908_singletubule_raw\230901_st_93_C2.raw	9712.61	Control_1
Cul4b	A2A432	A2A432	F:\Yifan\20230908_singletubule_raw\230901_st_93_B3.raw		Control_1
Cul4b	A2A432	A2A432	F:\Yifan\20230908_singletubule_raw\230901_st_93_A7.raw		Control_1
Cul4b	A2A432	A2A432	F:\Yifan\20230908_singletubule_raw\230901_st_93_G6.raw		Control_1
Cul4b	A2A432	A2A432	F:\Yifan\20230908_singletubule_raw\230901_st_93_D7.raw		Control_1
Cul4b	A2A432	A2A432	F:\Yifan\20230908_singletubule_raw\230901_st_93_G1.raw		Control_1
Cul4b	A2A432	A2A432	F:\Yifan\20230908_singletubule_raw\230901_st_93_H6.raw		Control_1
Cul4b	A2A432	A2A432	F:\Yifan\20230908_singletubule_raw\230901_st_93_A4.raw		Control_1
Cul4b	A2A432	A2A432	F:\Yifan\20230908_singletubule_raw\230901_st_93_B8.raw		Control_1
Cul4b	A2A432	A2A432	F:\Yifan\20230908_singletubule_raw\230901_st_93_A3.raw		Control_1
Cul4b	A2A432	A2A432	F:\Yifan\20230908_singletubule_raw\230901_st_93_A1.raw		Control_1
Cul4b	A2A432	A2A432	F:\Yifan\20230908_singletubule_raw\230901_st_93_A2.raw		Control_1
Cul4b	A2A432	A2A432	F:\Yifan\20230908_singletubule_raw\230901_st_93_A6.raw		Control_1
Ptprf	A2A8L5	A2A8L5	F:\Yifan\20230908_singletubule_raw\230901_st_93_E8.raw	17766.2	Control_1
Ptprf	A2A8L5	A2A8L5	F:\Yifan\20230908_singletubule_raw\230901_st_93_G10.raw	12621	Control_1
Ptprf	A2A8L5	A2A8L5	F:\Yifan\20230908_singletubule_raw\230901_st_93_G11.raw	15248.9	Control_1
Ptprf	A2A8L5	A2A8L5	F:\Yifan\20230908_singletubule_raw\230901_st_93_H10.raw	14459.3	Control_1
Ptprf	A2A8L5	A2A8L5	F:\Yifan\20230908_singletubule_raw\230901_st_93_H12.raw	15053.8	Control_1
Ptprf	A2A8L5	A2A8L5	F:\Yifan\20230908_singletubule_raw\230901_st_93_H3.raw	19249.2	Control_1
Ptprf	A2A8L5	A2A8L5	F:\Yifan\20230908_singletubule_raw\230901_st_93_B6.raw		Control_1
Ptprf	A2A8L5	A2A8L5	F:\Yifan\20230908_singletubule_raw\230901_st_93_H11.raw		Control_1
Ptprf	A2A8L5	A2A8L5	F:\Yifan\20230908_singletubule_raw\230901_st_93_E6.raw		Control_1
Ptprf	A2A8L5	A2A8L5	F:\Yifan\20230908_singletubule_raw\230901_st_93_E7.raw		Control_1
Ptprf	A2A8L5	A2A8L5	F:\Yifan\20230908_singletubule_raw\230901_st_93_G9.raw		Control_1
Ptprf	A2A8L5	A2A8L5	F:\Yifan\20230908_singletubule_raw\230901_st_93_F10.raw	20056.9	Control_1
Ptprf	A2A8L5	A2A8L5	F:\Yifan\20230908_singletubule_raw\230901_st_93_E9.raw	22737.9	Control_1
Ptprf	A2A8L5	A2A8L5	F:\Yifan\20230908_singletubule_raw\230901_st_93_D10.raw	17450.7	Control_1
Ptprf	A2A8L5	A2A8L5	F:\Yifan\20230908_singletubule_raw\230901_st_93_F9.raw	14937.1	Control_1
Ptprf	A2A8L5	A2A8L5	F:\Yifan\20230908_singletubule_raw\230901_st_93_G7.raw		Control_1
Ptprf	A2A8L5	A2A8L5	F:\Yifan\20230908_singletubule_raw\230901_st_93_A9.raw	14043.3	Control_1
Ptprf	A2A8L5	A2A8L5	F:\Yifan\20230908_singletubule_raw\230901_st_93_E3.raw		Control_1
Ptprf	A2A8L5	A2A8L5	F:\Yifan\20230908_singletubule_raw\230901_st_93_C7.raw	14637.3	Control_1
Ptprf	A2A8L5	A2A8L5	F:\Yifan\20230908_singletubule_raw\230901_st_93_G4.raw	24575	Control_1
Ptprf	A2A8L5	A2A8L5	F:\Yifan\20230908_singletubule_raw\230901_st_93_D3.raw		Control_1
Ptprf	A2A8L5	A2A8L5	F:\Yifan\20230908_singletubule_raw\230901_st_93_F2.raw		Control_1
Ptprf	A2A8L5	A2A8L5	F:\Yifan\20230908_singletubule_raw\230901_st_93_G8.raw		Control_1
Ptprf	A2A8L5	A2A8L5	F:\Yifan\20230908_singletubule_raw\230901_st_93_H4.raw	15643.3	Control_1
Ptprf	A2A8L5	A2A8L5	F:\Yifan\20230908_singletubule_raw\230901_st_93_D6.raw	20836.4	Control_1
Ptprf	A2A8L5	A2A8L5	F:\Yifan\20230908_singletubule_raw\230901_st_93_D4.raw		Control_1
Ptprf	A2A8L5	A2A8L5	F:\Yifan\20230908_singletubule_raw\230901_st_93_F12.raw		Control_1
Ptprf	A2A8L5	A2A8L5	F:\Yifan\20230908_singletubule_raw\230901_st_93_C9.raw	18461.8	Control_1
Ptprf	A2A8L5	A2A8L5	F:\Yifan\20230908_singletubule_raw\230901_st_93_G12.raw	13302.3	Control_1
Ptprf	A2A8L5	A2A8L5	F:\Yifan\20230908_singletubule_raw\230901_st_93_B10.raw	19516.7	Control_1
Ptprf	A2A8L5	A2A8L5	F:\Yifan\20230908_singletubule_raw\230901_st_93_B11.raw	14091.8	Control_1
Ptprf	A2A8L5	A2A8L5	F:\Yifan\20230908_singletubule_raw\230901_st_93_E11.raw		Control_1
Ptprf	A2A8L5	A2A8L5	F:\Yifan\20230908_singletubule_raw\230901_st_93_B12.raw	19192.7	Control_1
Ptprf	A2A8L5	A2A8L5	F:\Yifan\20230908_singletubule_raw\230901_st_93_F3.raw		Control_1
Ptprf	A2A8L5	A2A8L5	F:\Yifan\20230908_singletubule_raw\230901_st_93_B4.raw		Control_1
Ptprf	A2A8L5	A2A8L5	F:\Yifan\20230908_singletubule_raw\230901_st_93_C11.raw		Control_1
Ptprf	A2A8L5	A2A8L5	F:\Yifan\20230908_singletubule_raw\230901_st_93_B2.raw	11950.8	Control_1
Ptprf	A2A8L5	A2A8L5	F:\Yifan\20230908_singletubule_raw\230901_st_93_H9.raw	19154.9	Control_1
Ptprf	A2A8L5	A2A8L5	F:\Yifan\20230908_singletubule_raw\230901_st_93_F1.raw	7558.38	Control_1
Ptprf	A2A8L5	A2A8L5	F:\Yifan\20230908_singletubule_raw\230901_st_93_C12.raw		Control_1
Ptprf	A2A8L5	A2A8L5	F:\Yifan\20230908_singletubule_raw\230901_st_93_D2.raw	7021.58	Control_1
Ptprf	A2A8L5	A2A8L5	F:\Yifan\20230908_singletubule_raw\230901_st_93_H2.raw		Control_1
Ptprf	A2A8L5	A2A8L5	F:\Yifan\20230908_singletubule_raw\230901_st_93_A11.raw		Control_1
Ptprf	A2A8L5	A2A8L5	F:\Yifan\20230908_singletubule_raw\230901_st_93_D1.raw	11903.7	Control_1
Ptprf	A2A8L5	A2A8L5	F:\Yifan\20230908_singletubule_raw\230901_st_93_F7.raw	13440.2	Control_1
Ptprf	A2A8L5	A2A8L5	F:\Yifan\20230908_singletubule_raw\230901_st_93_E4.raw		Control_1
Ptprf	A2A8L5	A2A8L5	F:\Yifan\20230908_singletubule_raw\230901_st_93_F6.raw	17340	Control_1
Ptprf	A2A8L5	A2A8L5	F:\Yifan\20230908_singletubule_raw\230901_st_93_G2.raw	9800.78	Control_1
Ptprf	A2A8L5	A2A8L5	F:\Yifan\20230908_singletubule_raw\230901_st_93_C10.raw		Control_1
Ptprf	A2A8L5	A2A8L5	F:\Yifan\20230908_singletubule_raw\230901_st_93_E12.raw	16434	Control_1
Ptprf	A2A8L5	A2A8L5	F:\Yifan\20230908_singletubule_raw\230901_st_93_D12.raw	5965.44	Control_1
Ptprf	A2A8L5	A2A8L5	F:\Yifan\20230908_singletubule_raw\230901_st_93_H1.raw		Control_1
Ptprf	A2A8L5	A2A8L5	F:\Yifan\20230908_singletubule_raw\230901_st_93_C4.raw		Control_1
Ptprf	A2A8L5	A2A8L5	F:\Yifan\20230908_singletubule_raw\230901_st_93_A10.raw	22788.2	Control_1
Ptprf	A2A8L5	A2A8L5	F:\Yifan\20230908_singletubule_raw\230901_st_93_B9.raw		Control_1
Ptprf	A2A8L5	A2A8L5	F:\Yifan\20230908_singletubule_raw\230901_st_93_D8.raw		Control_1
Ptprf	A2A8L5	A2A8L5	F:\Yifan\20230908_singletubule_raw\230901_st_93_B1.raw		Control_1
Ptprf	A2A8L5	A2A8L5	F:\Yifan\20230908_singletubule_raw\230901_st_93_A12.raw		Control_1
Ptprf	A2A8L5	A2A8L5	F:\Yifan\20230908_singletubule_raw\230901_st_93_C1.raw		Control_1
Ptprf	A2A8L5	A2A8L5	F:\Yifan\20230908_singletubule_raw\230901_st_93_E10.raw		Control_1
Ptprf	A2A8L5	A2A8L5	F:\Yifan\20230908_singletubule_raw\230901_st_93_E2.raw		Control_1
Ptprf	A2A8L5	A2A8L5	F:\Yifan\20230908_singletubule_raw\230901_st_93_H7.raw		Control_1
Ptprf	A2A8L5	A2A8L5	F:\Yifan\20230908_singletubule_raw\230901_st_93_F4.raw		Control_1
Ptprf	A2A8L5	A2A8L5	F:\Yifan\20230908_singletubule_raw\230901_st_93_H8.raw		Control_1
Ptprf	A2A8L5	A2A8L5	F:\Yifan\20230908_singletubule_raw\230901_st_93_D11.raw	13690.2	Control_1
Ptprf	A2A8L5	A2A8L5	F:\Yifan\20230908_singletubule_raw\230901_st_93_C3.raw		Control_1
Ptprf	A2A8L5	A2A8L5	F:\Yifan\20230908_singletubule_raw\230901_st_93_D9.raw		Control_1
Ptprf	A2A8L5	A2A8L5	F:\Yifan\20230908_singletubule_raw\230901_st_93_F11.raw		Control_1
Ptprf	A2A8L5	A2A8L5	F:\Yifan\20230908_singletubule_raw\230901_st_93_B7.raw		Control_1
Ptprf	A2A8L5	A2A8L5	F:\Yifan\20230908_singletubule_raw\230901_st_93_F8.raw		Control_1
Ptprf	A2A8L5	A2A8L5	F:\Yifan\20230908_singletubule_raw\230901_st_93_C8.raw		Control_1
Ptprf	A2A8L5	A2A8L5	F:\Yifan\20230908_singletubule_raw\230901_st_93_A8.raw		Control_1
Ptprf	A2A8L5	A2A8L5	F:\Yifan\20230908_singletubule_raw\230901_st_93_G3.raw	25035.6	Control_1
Ptprf	A2A8L5	A2A8L5	F:\Yifan\20230908_singletubule_raw\230901_st_93_E1.raw		Control_1
Ptprf	A2A8L5	A2A8L5	F:\Yifan\20230908_singletubule_raw\230901_st_93_C2.raw		Control_1
Ptprf	A2A8L5	A2A8L5	F:\Yifan\20230908_singletubule_raw\230901_st_93_B3.raw		Control_1
Ptprf	A2A8L5	A2A8L5	F:\Yifan\20230908_singletubule_raw\230901_st_93_A7.raw		Control_1
Ptprf	A2A8L5	A2A8L5	F:\Yifan\20230908_singletubule_raw\230901_st_93_G6.raw		Control_1
Ptprf	A2A8L5	A2A8L5	F:\Yifan\20230908_singletubule_raw\230901_st_93_D7.raw		Control_1
Ptprf	A2A8L5	A2A8L5	F:\Yifan\20230908_singletubule_raw\230901_st_93_G1.raw		Control_1
Ptprf	A2A8L5	A2A8L5	F:\Yifan\20230908_singletubule_raw\230901_st_93_H6.raw		Control_1
Ptprf	A2A8L5	A2A8L5	F:\Yifan\20230908_singletubule_raw\230901_st_93_A4.raw		Control_1
Ptprf	A2A8L5	A2A8L5	F:\Yifan\20230908_singletubule_raw\230901_st_93_B8.raw		Control_1
Ptprf	A2A8L5	A2A8L5	F:\Yifan\20230908_singletubule_raw\230901_st_93_A3.raw		Control_1
Ptprf	A2A8L5	A2A8L5	F:\Yifan\20230908_singletubule_raw\230901_st_93_A1.raw		Control_1
Ptprf	A2A8L5	A2A8L5	F:\Yifan\20230908_singletubule_raw\230901_st_93_A2.raw		Control_1
Ptprf	A2A8L5	A2A8L5	F:\Yifan\20230908_singletubule_raw\230901_st_93_A6.raw		Control_1
Osbpl9	A2A8Z1	A2A8Z1	F:\Yifan\20230908_singletubule_raw\230901_st_93_E8.raw	25108.5	Control_1
Osbpl9	A2A8Z1	A2A8Z1	F:\Yifan\20230908_singletubule_raw\230901_st_93_G10.raw	31643.1	Control_1
Osbpl9	A2A8Z1	A2A8Z1	F:\Yifan\20230908_singletubule_raw\230901_st_93_G11.raw	40724.7	Control_1
Osbpl9	A2A8Z1	A2A8Z1	F:\Yifan\20230908_singletubule_raw\230901_st_93_H10.raw	37794.4	Control_1
Osbpl9	A2A8Z1	A2A8Z1	F:\Yifan\20230908_singletubule_raw\230901_st_93_H12.raw	45739.7	Control_1
Osbpl9	A2A8Z1	A2A8Z1	F:\Yifan\20230908_singletubule_raw\230901_st_93_H3.raw	58024	Control_1
Osbpl9	A2A8Z1	A2A8Z1	F:\Yifan\20230908_singletubule_raw\230901_st_93_B6.raw	39366.8	Control_1
Osbpl9	A2A8Z1	A2A8Z1	F:\Yifan\20230908_singletubule_raw\230901_st_93_H11.raw	54877.9	Control_1
Osbpl9	A2A8Z1	A2A8Z1	F:\Yifan\20230908_singletubule_raw\230901_st_93_E6.raw	41389.5	Control_1
Osbpl9	A2A8Z1	A2A8Z1	F:\Yifan\20230908_singletubule_raw\230901_st_93_E7.raw	46468.4	Control_1
Osbpl9	A2A8Z1	A2A8Z1	F:\Yifan\20230908_singletubule_raw\230901_st_93_G9.raw	62359.2	Control_1
Osbpl9	A2A8Z1	A2A8Z1	F:\Yifan\20230908_singletubule_raw\230901_st_93_F10.raw	24624.6	Control_1
Osbpl9	A2A8Z1	A2A8Z1	F:\Yifan\20230908_singletubule_raw\230901_st_93_E9.raw	53210.5	Control_1
Osbpl9	A2A8Z1	A2A8Z1	F:\Yifan\20230908_singletubule_raw\230901_st_93_D10.raw	48285.9	Control_1
Osbpl9	A2A8Z1	A2A8Z1	F:\Yifan\20230908_singletubule_raw\230901_st_93_F9.raw	39318	Control_1
Osbpl9	A2A8Z1	A2A8Z1	F:\Yifan\20230908_singletubule_raw\230901_st_93_G7.raw	33234	Control_1
Osbpl9	A2A8Z1	A2A8Z1	F:\Yifan\20230908_singletubule_raw\230901_st_93_A9.raw	36388.6	Control_1
Osbpl9	A2A8Z1	A2A8Z1	F:\Yifan\20230908_singletubule_raw\230901_st_93_E3.raw	35650	Control_1
Osbpl9	A2A8Z1	A2A8Z1	F:\Yifan\20230908_singletubule_raw\230901_st_93_C7.raw	36682.8	Control_1
Osbpl9	A2A8Z1	A2A8Z1	F:\Yifan\20230908_singletubule_raw\230901_st_93_G4.raw	38837.9	Control_1
Osbpl9	A2A8Z1	A2A8Z1	F:\Yifan\20230908_singletubule_raw\230901_st_93_D3.raw	27723.6	Control_1
Osbpl9	A2A8Z1	A2A8Z1	F:\Yifan\20230908_singletubule_raw\230901_st_93_F2.raw	61445.5	Control_1
Osbpl9	A2A8Z1	A2A8Z1	F:\Yifan\20230908_singletubule_raw\230901_st_93_G8.raw	48756	Control_1
Osbpl9	A2A8Z1	A2A8Z1	F:\Yifan\20230908_singletubule_raw\230901_st_93_H4.raw	38104.1	Control_1
Osbpl9	A2A8Z1	A2A8Z1	F:\Yifan\20230908_singletubule_raw\230901_st_93_D6.raw	24138.8	Control_1
Osbpl9	A2A8Z1	A2A8Z1	F:\Yifan\20230908_singletubule_raw\230901_st_93_D4.raw	32182	Control_1
Osbpl9	A2A8Z1	A2A8Z1	F:\Yifan\20230908_singletubule_raw\230901_st_93_F12.raw	53893.6	Control_1
Osbpl9	A2A8Z1	A2A8Z1	F:\Yifan\20230908_singletubule_raw\230901_st_93_C9.raw	46034.2	Control_1
Osbpl9	A2A8Z1	A2A8Z1	F:\Yifan\20230908_singletubule_raw\230901_st_93_G12.raw	26288.4	Control_1
Osbpl9	A2A8Z1	A2A8Z1	F:\Yifan\20230908_singletubule_raw\230901_st_93_B10.raw	32316.2	Control_1
Osbpl9	A2A8Z1	A2A8Z1	F:\Yifan\20230908_singletubule_raw\230901_st_93_B11.raw	61582.3	Control_1
Osbpl9	A2A8Z1	A2A8Z1	F:\Yifan\20230908_singletubule_raw\230901_st_93_E11.raw	28730.5	Control_1
Osbpl9	A2A8Z1	A2A8Z1	F:\Yifan\20230908_singletubule_raw\230901_st_93_B12.raw	42333.8	Control_1
Osbpl9	A2A8Z1	A2A8Z1	F:\Yifan\20230908_singletubule_raw\230901_st_93_F3.raw	50870.1	Control_1
Osbpl9	A2A8Z1	A2A8Z1	F:\Yifan\20230908_singletubule_raw\230901_st_93_B4.raw	40219.2	Control_1
Osbpl9	A2A8Z1	A2A8Z1	F:\Yifan\20230908_singletubule_raw\230901_st_93_C11.raw	37281	Control_1
Osbpl9	A2A8Z1	A2A8Z1	F:\Yifan\20230908_singletubule_raw\230901_st_93_B2.raw	41157.2	Control_1
Osbpl9	A2A8Z1	A2A8Z1	F:\Yifan\20230908_singletubule_raw\230901_st_93_H9.raw	39031.2	Control_1
Osbpl9	A2A8Z1	A2A8Z1	F:\Yifan\20230908_singletubule_raw\230901_st_93_F1.raw	32765.8	Control_1
Osbpl9	A2A8Z1	A2A8Z1	F:\Yifan\20230908_singletubule_raw\230901_st_93_C12.raw	28740.6	Control_1
Osbpl9	A2A8Z1	A2A8Z1	F:\Yifan\20230908_singletubule_raw\230901_st_93_D2.raw	21564.3	Control_1
Osbpl9	A2A8Z1	A2A8Z1	F:\Yifan\20230908_singletubule_raw\230901_st_93_H2.raw	66441.5	Control_1
Osbpl9	A2A8Z1	A2A8Z1	F:\Yifan\20230908_singletubule_raw\230901_st_93_A11.raw	38484.8	Control_1
Osbpl9	A2A8Z1	A2A8Z1	F:\Yifan\20230908_singletubule_raw\230901_st_93_D1.raw	52476.4	Control_1
Osbpl9	A2A8Z1	A2A8Z1	F:\Yifan\20230908_singletubule_raw\230901_st_93_F7.raw	30545.9	Control_1
Osbpl9	A2A8Z1	A2A8Z1	F:\Yifan\20230908_singletubule_raw\230901_st_93_E4.raw	70364.4	Control_1
Osbpl9	A2A8Z1	A2A8Z1	F:\Yifan\20230908_singletubule_raw\230901_st_93_F6.raw	49288.5	Control_1
Osbpl9	A2A8Z1	A2A8Z1	F:\Yifan\20230908_singletubule_raw\230901_st_93_G2.raw		Control_1
Osbpl9	A2A8Z1	A2A8Z1	F:\Yifan\20230908_singletubule_raw\230901_st_93_C10.raw	39156.4	Control_1
Osbpl9	A2A8Z1	A2A8Z1	F:\Yifan\20230908_singletubule_raw\230901_st_93_E12.raw	15965.2	Control_1
Osbpl9	A2A8Z1	A2A8Z1	F:\Yifan\20230908_singletubule_raw\230901_st_93_D12.raw	50424	Control_1
Osbpl9	A2A8Z1	A2A8Z1	F:\Yifan\20230908_singletubule_raw\230901_st_93_H1.raw	33550	Control_1
Osbpl9	A2A8Z1	A2A8Z1	F:\Yifan\20230908_singletubule_raw\230901_st_93_C4.raw	26560.2	Control_1
Osbpl9	A2A8Z1	A2A8Z1	F:\Yifan\20230908_singletubule_raw\230901_st_93_A10.raw	26666	Control_1
Osbpl9	A2A8Z1	A2A8Z1	F:\Yifan\20230908_singletubule_raw\230901_st_93_B9.raw	54466.2	Control_1
Osbpl9	A2A8Z1	A2A8Z1	F:\Yifan\20230908_singletubule_raw\230901_st_93_D8.raw	31029	Control_1
Osbpl9	A2A8Z1	A2A8Z1	F:\Yifan\20230908_singletubule_raw\230901_st_93_B1.raw	33190.5	Control_1
Osbpl9	A2A8Z1	A2A8Z1	F:\Yifan\20230908_singletubule_raw\230901_st_93_A12.raw	58595.2	Control_1
Osbpl9	A2A8Z1	A2A8Z1	F:\Yifan\20230908_singletubule_raw\230901_st_93_C1.raw	49478.1	Control_1
Osbpl9	A2A8Z1	A2A8Z1	F:\Yifan\20230908_singletubule_raw\230901_st_93_E10.raw	85240.5	Control_1
Osbpl9	A2A8Z1	A2A8Z1	F:\Yifan\20230908_singletubule_raw\230901_st_93_E2.raw		Control_1
Osbpl9	A2A8Z1	A2A8Z1	F:\Yifan\20230908_singletubule_raw\230901_st_93_H7.raw		Control_1
Osbpl9	A2A8Z1	A2A8Z1	F:\Yifan\20230908_singletubule_raw\230901_st_93_F4.raw	58872.1	Control_1
Osbpl9	A2A8Z1	A2A8Z1	F:\Yifan\20230908_singletubule_raw\230901_st_93_H8.raw		Control_1
Osbpl9	A2A8Z1	A2A8Z1	F:\Yifan\20230908_singletubule_raw\230901_st_93_D11.raw		Control_1
Osbpl9	A2A8Z1	A2A8Z1	F:\Yifan\20230908_singletubule_raw\230901_st_93_C3.raw	75585.6	Control_1
Osbpl9	A2A8Z1	A2A8Z1	F:\Yifan\20230908_singletubule_raw\230901_st_93_D9.raw	94728	Control_1
Osbpl9	A2A8Z1	A2A8Z1	F:\Yifan\20230908_singletubule_raw\230901_st_93_F11.raw	55796.6	Control_1
Osbpl9	A2A8Z1	A2A8Z1	F:\Yifan\20230908_singletubule_raw\230901_st_93_B7.raw	13871.7	Control_1
Osbpl9	A2A8Z1	A2A8Z1	F:\Yifan\20230908_singletubule_raw\230901_st_93_F8.raw	40781.4	Control_1
Osbpl9	A2A8Z1	A2A8Z1	F:\Yifan\20230908_singletubule_raw\230901_st_93_C8.raw		Control_1
Osbpl9	A2A8Z1	A2A8Z1	F:\Yifan\20230908_singletubule_raw\230901_st_93_A8.raw	30119.3	Control_1
Osbpl9	A2A8Z1	A2A8Z1	F:\Yifan\20230908_singletubule_raw\230901_st_93_G3.raw		Control_1
Osbpl9	A2A8Z1	A2A8Z1	F:\Yifan\20230908_singletubule_raw\230901_st_93_E1.raw	23716	Control_1
Osbpl9	A2A8Z1	A2A8Z1	F:\Yifan\20230908_singletubule_raw\230901_st_93_C2.raw	23028	Control_1
Osbpl9	A2A8Z1	A2A8Z1	F:\Yifan\20230908_singletubule_raw\230901_st_93_B3.raw		Control_1
Osbpl9	A2A8Z1	A2A8Z1	F:\Yifan\20230908_singletubule_raw\230901_st_93_A7.raw		Control_1
Osbpl9	A2A8Z1	A2A8Z1	F:\Yifan\20230908_singletubule_raw\230901_st_93_G6.raw	61326.5	Control_1
Osbpl9	A2A8Z1	A2A8Z1	F:\Yifan\20230908_singletubule_raw\230901_st_93_D7.raw		Control_1
Osbpl9	A2A8Z1	A2A8Z1	F:\Yifan\20230908_singletubule_raw\230901_st_93_G1.raw	63642	Control_1
Osbpl9	A2A8Z1	A2A8Z1	F:\Yifan\20230908_singletubule_raw\230901_st_93_H6.raw		Control_1
Osbpl9	A2A8Z1	A2A8Z1	F:\Yifan\20230908_singletubule_raw\230901_st_93_A4.raw		Control_1
Osbpl9	A2A8Z1	A2A8Z1	F:\Yifan\20230908_singletubule_raw\230901_st_93_B8.raw		Control_1
Osbpl9	A2A8Z1	A2A8Z1	F:\Yifan\20230908_singletubule_raw\230901_st_93_A3.raw		Control_1
Osbpl9	A2A8Z1	A2A8Z1	F:\Yifan\20230908_singletubule_raw\230901_st_93_A1.raw		Control_1
Osbpl9	A2A8Z1	A2A8Z1	F:\Yifan\20230908_singletubule_raw\230901_st_93_A2.raw		Control_1
Osbpl9	A2A8Z1	A2A8Z1	F:\Yifan\20230908_singletubule_raw\230901_st_93_A6.raw		Control_1
Bltp1	A2AAE1	A2AAE1	F:\Yifan\20230908_singletubule_raw\230901_st_93_E8.raw		Control_1
Bltp1	A2AAE1	A2AAE1	F:\Yifan\20230908_singletubule_raw\230901_st_93_G10.raw	2392.95	Control_1
Bltp1	A2AAE1	A2AAE1	F:\Yifan\20230908_singletubule_raw\230901_st_93_G11.raw	2424.07	Control_1
Bltp1	A2AAE1	A2AAE1	F:\Yifan\20230908_singletubule_raw\230901_st_93_H10.raw	3582.5	Control_1
Bltp1	A2AAE1	A2AAE1	F:\Yifan\20230908_singletubule_raw\230901_st_93_H12.raw	5549.91	Control_1
Bltp1	A2AAE1	A2AAE1	F:\Yifan\20230908_singletubule_raw\230901_st_93_H3.raw	4519.03	Control_1
Bltp1	A2AAE1	A2AAE1	F:\Yifan\20230908_singletubule_raw\230901_st_93_B6.raw		Control_1
Bltp1	A2AAE1	A2AAE1	F:\Yifan\20230908_singletubule_raw\230901_st_93_H11.raw	1377.71	Control_1
Bltp1	A2AAE1	A2AAE1	F:\Yifan\20230908_singletubule_raw\230901_st_93_E6.raw		Control_1
Bltp1	A2AAE1	A2AAE1	F:\Yifan\20230908_singletubule_raw\230901_st_93_E7.raw		Control_1
Bltp1	A2AAE1	A2AAE1	F:\Yifan\20230908_singletubule_raw\230901_st_93_G9.raw		Control_1
Bltp1	A2AAE1	A2AAE1	F:\Yifan\20230908_singletubule_raw\230901_st_93_F10.raw		Control_1
Bltp1	A2AAE1	A2AAE1	F:\Yifan\20230908_singletubule_raw\230901_st_93_E9.raw	5190.19	Control_1
Bltp1	A2AAE1	A2AAE1	F:\Yifan\20230908_singletubule_raw\230901_st_93_D10.raw	3837.72	Control_1
Bltp1	A2AAE1	A2AAE1	F:\Yifan\20230908_singletubule_raw\230901_st_93_F9.raw	2293.34	Control_1
Bltp1	A2AAE1	A2AAE1	F:\Yifan\20230908_singletubule_raw\230901_st_93_G7.raw	2128.2	Control_1
Bltp1	A2AAE1	A2AAE1	F:\Yifan\20230908_singletubule_raw\230901_st_93_A9.raw		Control_1
Bltp1	A2AAE1	A2AAE1	F:\Yifan\20230908_singletubule_raw\230901_st_93_E3.raw	2699.91	Control_1
Bltp1	A2AAE1	A2AAE1	F:\Yifan\20230908_singletubule_raw\230901_st_93_C7.raw	1523.82	Control_1
Bltp1	A2AAE1	A2AAE1	F:\Yifan\20230908_singletubule_raw\230901_st_93_G4.raw	3227.46	Control_1
Bltp1	A2AAE1	A2AAE1	F:\Yifan\20230908_singletubule_raw\230901_st_93_D3.raw		Control_1
Bltp1	A2AAE1	A2AAE1	F:\Yifan\20230908_singletubule_raw\230901_st_93_F2.raw	3539.08	Control_1
Bltp1	A2AAE1	A2AAE1	F:\Yifan\20230908_singletubule_raw\230901_st_93_G8.raw		Control_1
Bltp1	A2AAE1	A2AAE1	F:\Yifan\20230908_singletubule_raw\230901_st_93_H4.raw	5369.54	Control_1
Bltp1	A2AAE1	A2AAE1	F:\Yifan\20230908_singletubule_raw\230901_st_93_D6.raw		Control_1
Bltp1	A2AAE1	A2AAE1	F:\Yifan\20230908_singletubule_raw\230901_st_93_D4.raw		Control_1
Bltp1	A2AAE1	A2AAE1	F:\Yifan\20230908_singletubule_raw\230901_st_93_F12.raw		Control_1
Bltp1	A2AAE1	A2AAE1	F:\Yifan\20230908_singletubule_raw\230901_st_93_C9.raw		Control_1
Bltp1	A2AAE1	A2AAE1	F:\Yifan\20230908_singletubule_raw\230901_st_93_G12.raw	4764.64	Control_1
Bltp1	A2AAE1	A2AAE1	F:\Yifan\20230908_singletubule_raw\230901_st_93_B10.raw		Control_1
Bltp1	A2AAE1	A2AAE1	F:\Yifan\20230908_singletubule_raw\230901_st_93_B11.raw	4079.46	Control_1
Bltp1	A2AAE1	A2AAE1	F:\Yifan\20230908_singletubule_raw\230901_st_93_E11.raw		Control_1
Bltp1	A2AAE1	A2AAE1	F:\Yifan\20230908_singletubule_raw\230901_st_93_B12.raw	4031.43	Control_1
Bltp1	A2AAE1	A2AAE1	F:\Yifan\20230908_singletubule_raw\230901_st_93_F3.raw	3003.62	Control_1
Bltp1	A2AAE1	A2AAE1	F:\Yifan\20230908_singletubule_raw\230901_st_93_B4.raw		Control_1
Bltp1	A2AAE1	A2AAE1	F:\Yifan\20230908_singletubule_raw\230901_st_93_C11.raw		Control_1
Bltp1	A2AAE1	A2AAE1	F:\Yifan\20230908_singletubule_raw\230901_st_93_B2.raw	4413.38	Control_1
Bltp1	A2AAE1	A2AAE1	F:\Yifan\20230908_singletubule_raw\230901_st_93_H9.raw		Control_1
Bltp1	A2AAE1	A2AAE1	F:\Yifan\20230908_singletubule_raw\230901_st_93_F1.raw	4516.03	Control_1
Bltp1	A2AAE1	A2AAE1	F:\Yifan\20230908_singletubule_raw\230901_st_93_C12.raw	4083.44	Control_1
Bltp1	A2AAE1	A2AAE1	F:\Yifan\20230908_singletubule_raw\230901_st_93_D2.raw	4441.25	Control_1
Bltp1	A2AAE1	A2AAE1	F:\Yifan\20230908_singletubule_raw\230901_st_93_H2.raw	4024.98	Control_1
Bltp1	A2AAE1	A2AAE1	F:\Yifan\20230908_singletubule_raw\230901_st_93_A11.raw		Control_1
Bltp1	A2AAE1	A2AAE1	F:\Yifan\20230908_singletubule_raw\230901_st_93_D1.raw		Control_1
Bltp1	A2AAE1	A2AAE1	F:\Yifan\20230908_singletubule_raw\230901_st_93_F7.raw	2926.84	Control_1
Bltp1	A2AAE1	A2AAE1	F:\Yifan\20230908_singletubule_raw\230901_st_93_E4.raw		Control_1
Bltp1	A2AAE1	A2AAE1	F:\Yifan\20230908_singletubule_raw\230901_st_93_F6.raw		Control_1
Bltp1	A2AAE1	A2AAE1	F:\Yifan\20230908_singletubule_raw\230901_st_93_G2.raw	4753.52	Control_1
Bltp1	A2AAE1	A2AAE1	F:\Yifan\20230908_singletubule_raw\230901_st_93_C10.raw	4286.67	Control_1
Bltp1	A2AAE1	A2AAE1	F:\Yifan\20230908_singletubule_raw\230901_st_93_E12.raw	3521.25	Control_1
Bltp1	A2AAE1	A2AAE1	F:\Yifan\20230908_singletubule_raw\230901_st_93_D12.raw	2945.17	Control_1
Bltp1	A2AAE1	A2AAE1	F:\Yifan\20230908_singletubule_raw\230901_st_93_H1.raw		Control_1
Bltp1	A2AAE1	A2AAE1	F:\Yifan\20230908_singletubule_raw\230901_st_93_C4.raw		Control_1
Bltp1	A2AAE1	A2AAE1	F:\Yifan\20230908_singletubule_raw\230901_st_93_A10.raw		Control_1
Bltp1	A2AAE1	A2AAE1	F:\Yifan\20230908_singletubule_raw\230901_st_93_B9.raw		Control_1
Bltp1	A2AAE1	A2AAE1	F:\Yifan\20230908_singletubule_raw\230901_st_93_D8.raw	3310.87	Control_1
Bltp1	A2AAE1	A2AAE1	F:\Yifan\20230908_singletubule_raw\230901_st_93_B1.raw		Control_1
Bltp1	A2AAE1	A2AAE1	F:\Yifan\20230908_singletubule_raw\230901_st_93_A12.raw		Control_1
Bltp1	A2AAE1	A2AAE1	F:\Yifan\20230908_singletubule_raw\230901_st_93_C1.raw		Control_1
Bltp1	A2AAE1	A2AAE1	F:\Yifan\20230908_singletubule_raw\230901_st_93_E10.raw	3109.21	Control_1
Bltp1	A2AAE1	A2AAE1	F:\Yifan\20230908_singletubule_raw\230901_st_93_E2.raw	3709.3	Control_1
Bltp1	A2AAE1	A2AAE1	F:\Yifan\20230908_singletubule_raw\230901_st_93_H7.raw		Control_1
Bltp1	A2AAE1	A2AAE1	F:\Yifan\20230908_singletubule_raw\230901_st_93_F4.raw		Control_1
Bltp1	A2AAE1	A2AAE1	F:\Yifan\20230908_singletubule_raw\230901_st_93_H8.raw		Control_1
Bltp1	A2AAE1	A2AAE1	F:\Yifan\20230908_singletubule_raw\230901_st_93_D11.raw		Control_1
Bltp1	A2AAE1	A2AAE1	F:\Yifan\20230908_singletubule_raw\230901_st_93_C3.raw		Control_1
Bltp1	A2AAE1	A2AAE1	F:\Yifan\20230908_singletubule_raw\230901_st_93_D9.raw	4612.77	Control_1
Bltp1	A2AAE1	A2AAE1	F:\Yifan\20230908_singletubule_raw\230901_st_93_F11.raw		Control_1
Bltp1	A2AAE1	A2AAE1	F:\Yifan\20230908_singletubule_raw\230901_st_93_B7.raw	1237.53	Control_1
Bltp1	A2AAE1	A2AAE1	F:\Yifan\20230908_singletubule_raw\230901_st_93_F8.raw	4270.9	Control_1
Bltp1	A2AAE1	A2AAE1	F:\Yifan\20230908_singletubule_raw\230901_st_93_C8.raw		Control_1
Bltp1	A2AAE1	A2AAE1	F:\Yifan\20230908_singletubule_raw\230901_st_93_A8.raw		Control_1
Bltp1	A2AAE1	A2AAE1	F:\Yifan\20230908_singletubule_raw\230901_st_93_G3.raw	4987.01	Control_1
Bltp1	A2AAE1	A2AAE1	F:\Yifan\20230908_singletubule_raw\230901_st_93_E1.raw		Control_1
Bltp1	A2AAE1	A2AAE1	F:\Yifan\20230908_singletubule_raw\230901_st_93_C2.raw		Control_1
Bltp1	A2AAE1	A2AAE1	F:\Yifan\20230908_singletubule_raw\230901_st_93_B3.raw		Control_1
Bltp1	A2AAE1	A2AAE1	F:\Yifan\20230908_singletubule_raw\230901_st_93_A7.raw		Control_1
Bltp1	A2AAE1	A2AAE1	F:\Yifan\20230908_singletubule_raw\230901_st_93_G6.raw		Control_1
Bltp1	A2AAE1	A2AAE1	F:\Yifan\20230908_singletubule_raw\230901_st_93_D7.raw		Control_1
Bltp1	A2AAE1	A2AAE1	F:\Yifan\20230908_singletubule_raw\230901_st_93_G1.raw		Control_1
Bltp1	A2AAE1	A2AAE1	F:\Yifan\20230908_singletubule_raw\230901_st_93_H6.raw		Control_1
Bltp1	A2AAE1	A2AAE1	F:\Yifan\20230908_singletubule_raw\230901_st_93_A4.raw		Control_1
Bltp1	A2AAE1	A2AAE1	F:\Yifan\20230908_singletubule_raw\230901_st_93_B8.raw		Control_1
Bltp1	A2AAE1	A2AAE1	F:\Yifan\20230908_singletubule_raw\230901_st_93_A3.raw		Control_1
Bltp1	A2AAE1	A2AAE1	F:\Yifan\20230908_singletubule_raw\230901_st_93_A1.raw		Control_1
Bltp1	A2AAE1	A2AAE1	F:\Yifan\20230908_singletubule_raw\230901_st_93_A2.raw		Control_1
Bltp1	A2AAE1	A2AAE1	F:\Yifan\20230908_singletubule_raw\230901_st_93_A6.raw		Control_1
Ddi2	A2ADY9	A2ADY9	F:\Yifan\20230908_singletubule_raw\230901_st_93_E8.raw	45905.3	Control_1
Ddi2	A2ADY9	A2ADY9	F:\Yifan\20230908_singletubule_raw\230901_st_93_G10.raw	52175.1	Control_1
Ddi2	A2ADY9	A2ADY9	F:\Yifan\20230908_singletubule_raw\230901_st_93_G11.raw	24648	Control_1
Ddi2	A2ADY9	A2ADY9	F:\Yifan\20230908_singletubule_raw\230901_st_93_H10.raw	22759.8	Control_1
Ddi2	A2ADY9	A2ADY9	F:\Yifan\20230908_singletubule_raw\230901_st_93_H12.raw	12126.3	Control_1
Ddi2	A2ADY9	A2ADY9	F:\Yifan\20230908_singletubule_raw\230901_st_93_H3.raw	20164.7	Control_1
Ddi2	A2ADY9	A2ADY9	F:\Yifan\20230908_singletubule_raw\230901_st_93_B6.raw	34145.8	Control_1
Ddi2	A2ADY9	A2ADY9	F:\Yifan\20230908_singletubule_raw\230901_st_93_H11.raw	31957	Control_1
Ddi2	A2ADY9	A2ADY9	F:\Yifan\20230908_singletubule_raw\230901_st_93_E6.raw	29231.6	Control_1
Ddi2	A2ADY9	A2ADY9	F:\Yifan\20230908_singletubule_raw\230901_st_93_E7.raw	27959.2	Control_1
Ddi2	A2ADY9	A2ADY9	F:\Yifan\20230908_singletubule_raw\230901_st_93_G9.raw	20463.9	Control_1
Ddi2	A2ADY9	A2ADY9	F:\Yifan\20230908_singletubule_raw\230901_st_93_F10.raw	33564.3	Control_1
Ddi2	A2ADY9	A2ADY9	F:\Yifan\20230908_singletubule_raw\230901_st_93_E9.raw	13992	Control_1
Ddi2	A2ADY9	A2ADY9	F:\Yifan\20230908_singletubule_raw\230901_st_93_D10.raw	17284.2	Control_1
Ddi2	A2ADY9	A2ADY9	F:\Yifan\20230908_singletubule_raw\230901_st_93_F9.raw	19269.9	Control_1
Ddi2	A2ADY9	A2ADY9	F:\Yifan\20230908_singletubule_raw\230901_st_93_G7.raw	32175.1	Control_1
Ddi2	A2ADY9	A2ADY9	F:\Yifan\20230908_singletubule_raw\230901_st_93_A9.raw		Control_1
Ddi2	A2ADY9	A2ADY9	F:\Yifan\20230908_singletubule_raw\230901_st_93_E3.raw	30098.2	Control_1
Ddi2	A2ADY9	A2ADY9	F:\Yifan\20230908_singletubule_raw\230901_st_93_C7.raw	40217	Control_1
Ddi2	A2ADY9	A2ADY9	F:\Yifan\20230908_singletubule_raw\230901_st_93_G4.raw		Control_1
Ddi2	A2ADY9	A2ADY9	F:\Yifan\20230908_singletubule_raw\230901_st_93_D3.raw	23067.8	Control_1
Ddi2	A2ADY9	A2ADY9	F:\Yifan\20230908_singletubule_raw\230901_st_93_F2.raw	47281.7	Control_1
Ddi2	A2ADY9	A2ADY9	F:\Yifan\20230908_singletubule_raw\230901_st_93_G8.raw	34661.2	Control_1
Ddi2	A2ADY9	A2ADY9	F:\Yifan\20230908_singletubule_raw\230901_st_93_H4.raw		Control_1
Ddi2	A2ADY9	A2ADY9	F:\Yifan\20230908_singletubule_raw\230901_st_93_D6.raw	30181.5	Control_1
Ddi2	A2ADY9	A2ADY9	F:\Yifan\20230908_singletubule_raw\230901_st_93_D4.raw	53569.3	Control_1
Ddi2	A2ADY9	A2ADY9	F:\Yifan\20230908_singletubule_raw\230901_st_93_F12.raw		Control_1
Ddi2	A2ADY9	A2ADY9	F:\Yifan\20230908_singletubule_raw\230901_st_93_C9.raw	22583	Control_1
Ddi2	A2ADY9	A2ADY9	F:\Yifan\20230908_singletubule_raw\230901_st_93_G12.raw	30941.4	Control_1
Ddi2	A2ADY9	A2ADY9	F:\Yifan\20230908_singletubule_raw\230901_st_93_B10.raw	30015.2	Control_1
Ddi2	A2ADY9	A2ADY9	F:\Yifan\20230908_singletubule_raw\230901_st_93_B11.raw		Control_1
Ddi2	A2ADY9	A2ADY9	F:\Yifan\20230908_singletubule_raw\230901_st_93_E11.raw	24937.3	Control_1
Ddi2	A2ADY9	A2ADY9	F:\Yifan\20230908_singletubule_raw\230901_st_93_B12.raw	10405.9	Control_1
Ddi2	A2ADY9	A2ADY9	F:\Yifan\20230908_singletubule_raw\230901_st_93_F3.raw	44214.7	Control_1
Ddi2	A2ADY9	A2ADY9	F:\Yifan\20230908_singletubule_raw\230901_st_93_B4.raw	29790.4	Control_1
Ddi2	A2ADY9	A2ADY9	F:\Yifan\20230908_singletubule_raw\230901_st_93_C11.raw	10814.9	Control_1
Ddi2	A2ADY9	A2ADY9	F:\Yifan\20230908_singletubule_raw\230901_st_93_B2.raw	17819.1	Control_1
Ddi2	A2ADY9	A2ADY9	F:\Yifan\20230908_singletubule_raw\230901_st_93_H9.raw	46094.4	Control_1
Ddi2	A2ADY9	A2ADY9	F:\Yifan\20230908_singletubule_raw\230901_st_93_F1.raw		Control_1
Ddi2	A2ADY9	A2ADY9	F:\Yifan\20230908_singletubule_raw\230901_st_93_C12.raw	34388	Control_1
Ddi2	A2ADY9	A2ADY9	F:\Yifan\20230908_singletubule_raw\230901_st_93_D2.raw	21116.7	Control_1
Ddi2	A2ADY9	A2ADY9	F:\Yifan\20230908_singletubule_raw\230901_st_93_H2.raw		Control_1
Ddi2	A2ADY9	A2ADY9	F:\Yifan\20230908_singletubule_raw\230901_st_93_A11.raw	36043.8	Control_1
Ddi2	A2ADY9	A2ADY9	F:\Yifan\20230908_singletubule_raw\230901_st_93_D1.raw	13578.7	Control_1
Ddi2	A2ADY9	A2ADY9	F:\Yifan\20230908_singletubule_raw\230901_st_93_F7.raw		Control_1
Ddi2	A2ADY9	A2ADY9	F:\Yifan\20230908_singletubule_raw\230901_st_93_E4.raw	22955.2	Control_1
Ddi2	A2ADY9	A2ADY9	F:\Yifan\20230908_singletubule_raw\230901_st_93_F6.raw	19298.2	Control_1
Ddi2	A2ADY9	A2ADY9	F:\Yifan\20230908_singletubule_raw\230901_st_93_G2.raw		Control_1
Ddi2	A2ADY9	A2ADY9	F:\Yifan\20230908_singletubule_raw\230901_st_93_C10.raw		Control_1
Ddi2	A2ADY9	A2ADY9	F:\Yifan\20230908_singletubule_raw\230901_st_93_E12.raw		Control_1
Ddi2	A2ADY9	A2ADY9	F:\Yifan\20230908_singletubule_raw\230901_st_93_D12.raw	20681.4	Control_1
Ddi2	A2ADY9	A2ADY9	F:\Yifan\20230908_singletubule_raw\230901_st_93_H1.raw	32806.6	Control_1
Ddi2	A2ADY9	A2ADY9	F:\Yifan\20230908_singletubule_raw\230901_st_93_C4.raw	25855.2	Control_1
Ddi2	A2ADY9	A2ADY9	F:\Yifan\20230908_singletubule_raw\230901_st_93_A10.raw	24746.2	Control_1
Ddi2	A2ADY9	A2ADY9	F:\Yifan\20230908_singletubule_raw\230901_st_93_B9.raw	32905.1	Control_1
Ddi2	A2ADY9	A2ADY9	F:\Yifan\20230908_singletubule_raw\230901_st_93_D8.raw	65681	Control_1
Ddi2	A2ADY9	A2ADY9	F:\Yifan\20230908_singletubule_raw\230901_st_93_B1.raw		Control_1
Ddi2	A2ADY9	A2ADY9	F:\Yifan\20230908_singletubule_raw\230901_st_93_A12.raw	44114.5	Control_1
Ddi2	A2ADY9	A2ADY9	F:\Yifan\20230908_singletubule_raw\230901_st_93_C1.raw	29996.7	Control_1
Ddi2	A2ADY9	A2ADY9	F:\Yifan\20230908_singletubule_raw\230901_st_93_E10.raw	25600.9	Control_1
Ddi2	A2ADY9	A2ADY9	F:\Yifan\20230908_singletubule_raw\230901_st_93_E2.raw		Control_1
Ddi2	A2ADY9	A2ADY9	F:\Yifan\20230908_singletubule_raw\230901_st_93_H7.raw	88477.7	Control_1
Ddi2	A2ADY9	A2ADY9	F:\Yifan\20230908_singletubule_raw\230901_st_93_F4.raw	25039	Control_1
Ddi2	A2ADY9	A2ADY9	F:\Yifan\20230908_singletubule_raw\230901_st_93_H8.raw		Control_1
Ddi2	A2ADY9	A2ADY9	F:\Yifan\20230908_singletubule_raw\230901_st_93_D11.raw		Control_1
Ddi2	A2ADY9	A2ADY9	F:\Yifan\20230908_singletubule_raw\230901_st_93_C3.raw	34622.2	Control_1
Ddi2	A2ADY9	A2ADY9	F:\Yifan\20230908_singletubule_raw\230901_st_93_D9.raw	30547.6	Control_1
Ddi2	A2ADY9	A2ADY9	F:\Yifan\20230908_singletubule_raw\230901_st_93_F11.raw	16974.2	Control_1
Ddi2	A2ADY9	A2ADY9	F:\Yifan\20230908_singletubule_raw\230901_st_93_B7.raw		Control_1
Ddi2	A2ADY9	A2ADY9	F:\Yifan\20230908_singletubule_raw\230901_st_93_F8.raw	49750	Control_1
Ddi2	A2ADY9	A2ADY9	F:\Yifan\20230908_singletubule_raw\230901_st_93_C8.raw		Control_1
Ddi2	A2ADY9	A2ADY9	F:\Yifan\20230908_singletubule_raw\230901_st_93_A8.raw		Control_1
Ddi2	A2ADY9	A2ADY9	F:\Yifan\20230908_singletubule_raw\230901_st_93_G3.raw		Control_1
Ddi2	A2ADY9	A2ADY9	F:\Yifan\20230908_singletubule_raw\230901_st_93_E1.raw	20131.7	Control_1
Ddi2	A2ADY9	A2ADY9	F:\Yifan\20230908_singletubule_raw\230901_st_93_C2.raw	23230.9	Control_1
Ddi2	A2ADY9	A2ADY9	F:\Yifan\20230908_singletubule_raw\230901_st_93_B3.raw		Control_1
Ddi2	A2ADY9	A2ADY9	F:\Yifan\20230908_singletubule_raw\230901_st_93_A7.raw		Control_1
Ddi2	A2ADY9	A2ADY9	F:\Yifan\20230908_singletubule_raw\230901_st_93_G6.raw	35572.2	Control_1
Ddi2	A2ADY9	A2ADY9	F:\Yifan\20230908_singletubule_raw\230901_st_93_D7.raw		Control_1
Ddi2	A2ADY9	A2ADY9	F:\Yifan\20230908_singletubule_raw\230901_st_93_G1.raw	20005.1	Control_1
Ddi2	A2ADY9	A2ADY9	F:\Yifan\20230908_singletubule_raw\230901_st_93_H6.raw		Control_1
Ddi2	A2ADY9	A2ADY9	F:\Yifan\20230908_singletubule_raw\230901_st_93_A4.raw		Control_1
Ddi2	A2ADY9	A2ADY9	F:\Yifan\20230908_singletubule_raw\230901_st_93_B8.raw		Control_1
Ddi2	A2ADY9	A2ADY9	F:\Yifan\20230908_singletubule_raw\230901_st_93_A3.raw		Control_1
Ddi2	A2ADY9	A2ADY9	F:\Yifan\20230908_singletubule_raw\230901_st_93_A1.raw		Control_1
Ddi2	A2ADY9	A2ADY9	F:\Yifan\20230908_singletubule_raw\230901_st_93_A2.raw		Control_1
Ddi2	A2ADY9	A2ADY9	F:\Yifan\20230908_singletubule_raw\230901_st_93_A6.raw		Control_1
Ckap5	A2AGT5	A2AGT5	F:\Yifan\20230908_singletubule_raw\230901_st_93_E8.raw	29054.2	Control_1
Ckap5	A2AGT5	A2AGT5	F:\Yifan\20230908_singletubule_raw\230901_st_93_G10.raw	24810.3	Control_1
Ckap5	A2AGT5	A2AGT5	F:\Yifan\20230908_singletubule_raw\230901_st_93_G11.raw	32032.7	Control_1
Ckap5	A2AGT5	A2AGT5	F:\Yifan\20230908_singletubule_raw\230901_st_93_H10.raw	19147.7	Control_1
Ckap5	A2AGT5	A2AGT5	F:\Yifan\20230908_singletubule_raw\230901_st_93_H12.raw	12945.8	Control_1
Ckap5	A2AGT5	A2AGT5	F:\Yifan\20230908_singletubule_raw\230901_st_93_H3.raw	18245	Control_1
Ckap5	A2AGT5	A2AGT5	F:\Yifan\20230908_singletubule_raw\230901_st_93_B6.raw	26504.4	Control_1
Ckap5	A2AGT5	A2AGT5	F:\Yifan\20230908_singletubule_raw\230901_st_93_H11.raw	14888.1	Control_1
Ckap5	A2AGT5	A2AGT5	F:\Yifan\20230908_singletubule_raw\230901_st_93_E6.raw	18195.2	Control_1
Ckap5	A2AGT5	A2AGT5	F:\Yifan\20230908_singletubule_raw\230901_st_93_E7.raw	16649.1	Control_1
Ckap5	A2AGT5	A2AGT5	F:\Yifan\20230908_singletubule_raw\230901_st_93_G9.raw	16053.5	Control_1
Ckap5	A2AGT5	A2AGT5	F:\Yifan\20230908_singletubule_raw\230901_st_93_F10.raw	25054.4	Control_1
Ckap5	A2AGT5	A2AGT5	F:\Yifan\20230908_singletubule_raw\230901_st_93_E9.raw	35638.4	Control_1
Ckap5	A2AGT5	A2AGT5	F:\Yifan\20230908_singletubule_raw\230901_st_93_D10.raw	17188.8	Control_1
Ckap5	A2AGT5	A2AGT5	F:\Yifan\20230908_singletubule_raw\230901_st_93_F9.raw	18797.2	Control_1
Ckap5	A2AGT5	A2AGT5	F:\Yifan\20230908_singletubule_raw\230901_st_93_G7.raw	26636.1	Control_1
Ckap5	A2AGT5	A2AGT5	F:\Yifan\20230908_singletubule_raw\230901_st_93_A9.raw	14024.7	Control_1
Ckap5	A2AGT5	A2AGT5	F:\Yifan\20230908_singletubule_raw\230901_st_93_E3.raw	22337.8	Control_1
Ckap5	A2AGT5	A2AGT5	F:\Yifan\20230908_singletubule_raw\230901_st_93_C7.raw	19226.3	Control_1
Ckap5	A2AGT5	A2AGT5	F:\Yifan\20230908_singletubule_raw\230901_st_93_G4.raw	27157.5	Control_1
Ckap5	A2AGT5	A2AGT5	F:\Yifan\20230908_singletubule_raw\230901_st_93_D3.raw	19245.4	Control_1
Ckap5	A2AGT5	A2AGT5	F:\Yifan\20230908_singletubule_raw\230901_st_93_F2.raw	14755.1	Control_1
Ckap5	A2AGT5	A2AGT5	F:\Yifan\20230908_singletubule_raw\230901_st_93_G8.raw	17302	Control_1
Ckap5	A2AGT5	A2AGT5	F:\Yifan\20230908_singletubule_raw\230901_st_93_H4.raw	16708.4	Control_1
Ckap5	A2AGT5	A2AGT5	F:\Yifan\20230908_singletubule_raw\230901_st_93_D6.raw	19542.2	Control_1
Ckap5	A2AGT5	A2AGT5	F:\Yifan\20230908_singletubule_raw\230901_st_93_D4.raw	18907.7	Control_1
Ckap5	A2AGT5	A2AGT5	F:\Yifan\20230908_singletubule_raw\230901_st_93_F12.raw	18747.8	Control_1
Ckap5	A2AGT5	A2AGT5	F:\Yifan\20230908_singletubule_raw\230901_st_93_C9.raw	16314	Control_1
Ckap5	A2AGT5	A2AGT5	F:\Yifan\20230908_singletubule_raw\230901_st_93_G12.raw	24987	Control_1
Ckap5	A2AGT5	A2AGT5	F:\Yifan\20230908_singletubule_raw\230901_st_93_B10.raw	21433.2	Control_1
Ckap5	A2AGT5	A2AGT5	F:\Yifan\20230908_singletubule_raw\230901_st_93_B11.raw	16728.6	Control_1
Ckap5	A2AGT5	A2AGT5	F:\Yifan\20230908_singletubule_raw\230901_st_93_E11.raw	18600.1	Control_1
Ckap5	A2AGT5	A2AGT5	F:\Yifan\20230908_singletubule_raw\230901_st_93_B12.raw	27155.5	Control_1
Ckap5	A2AGT5	A2AGT5	F:\Yifan\20230908_singletubule_raw\230901_st_93_F3.raw	19553	Control_1
Ckap5	A2AGT5	A2AGT5	F:\Yifan\20230908_singletubule_raw\230901_st_93_B4.raw	10822.9	Control_1
Ckap5	A2AGT5	A2AGT5	F:\Yifan\20230908_singletubule_raw\230901_st_93_C11.raw	15880.3	Control_1
Ckap5	A2AGT5	A2AGT5	F:\Yifan\20230908_singletubule_raw\230901_st_93_B2.raw	17075.9	Control_1
Ckap5	A2AGT5	A2AGT5	F:\Yifan\20230908_singletubule_raw\230901_st_93_H9.raw	22294.9	Control_1
Ckap5	A2AGT5	A2AGT5	F:\Yifan\20230908_singletubule_raw\230901_st_93_F1.raw	28065.2	Control_1
Ckap5	A2AGT5	A2AGT5	F:\Yifan\20230908_singletubule_raw\230901_st_93_C12.raw	13884	Control_1
Ckap5	A2AGT5	A2AGT5	F:\Yifan\20230908_singletubule_raw\230901_st_93_D2.raw	15551	Control_1
Ckap5	A2AGT5	A2AGT5	F:\Yifan\20230908_singletubule_raw\230901_st_93_H2.raw	17101.5	Control_1
Ckap5	A2AGT5	A2AGT5	F:\Yifan\20230908_singletubule_raw\230901_st_93_A11.raw	22194.6	Control_1
Ckap5	A2AGT5	A2AGT5	F:\Yifan\20230908_singletubule_raw\230901_st_93_D1.raw	23246.7	Control_1
Ckap5	A2AGT5	A2AGT5	F:\Yifan\20230908_singletubule_raw\230901_st_93_F7.raw	10379.9	Control_1
Ckap5	A2AGT5	A2AGT5	F:\Yifan\20230908_singletubule_raw\230901_st_93_E4.raw	12525.1	Control_1
Ckap5	A2AGT5	A2AGT5	F:\Yifan\20230908_singletubule_raw\230901_st_93_F6.raw	19441	Control_1
Ckap5	A2AGT5	A2AGT5	F:\Yifan\20230908_singletubule_raw\230901_st_93_G2.raw	20964.4	Control_1
Ckap5	A2AGT5	A2AGT5	F:\Yifan\20230908_singletubule_raw\230901_st_93_C10.raw	16018.1	Control_1
Ckap5	A2AGT5	A2AGT5	F:\Yifan\20230908_singletubule_raw\230901_st_93_E12.raw	18588.4	Control_1
Ckap5	A2AGT5	A2AGT5	F:\Yifan\20230908_singletubule_raw\230901_st_93_D12.raw	14612.5	Control_1
Ckap5	A2AGT5	A2AGT5	F:\Yifan\20230908_singletubule_raw\230901_st_93_H1.raw	13492.9	Control_1
Ckap5	A2AGT5	A2AGT5	F:\Yifan\20230908_singletubule_raw\230901_st_93_C4.raw	21319	Control_1
Ckap5	A2AGT5	A2AGT5	F:\Yifan\20230908_singletubule_raw\230901_st_93_A10.raw	10573.9	Control_1
Ckap5	A2AGT5	A2AGT5	F:\Yifan\20230908_singletubule_raw\230901_st_93_B9.raw	14554.5	Control_1
Ckap5	A2AGT5	A2AGT5	F:\Yifan\20230908_singletubule_raw\230901_st_93_D8.raw	29444.7	Control_1
Ckap5	A2AGT5	A2AGT5	F:\Yifan\20230908_singletubule_raw\230901_st_93_B1.raw		Control_1
Ckap5	A2AGT5	A2AGT5	F:\Yifan\20230908_singletubule_raw\230901_st_93_A12.raw	17644	Control_1
Ckap5	A2AGT5	A2AGT5	F:\Yifan\20230908_singletubule_raw\230901_st_93_C1.raw	20299.4	Control_1
Ckap5	A2AGT5	A2AGT5	F:\Yifan\20230908_singletubule_raw\230901_st_93_E10.raw	14991.5	Control_1
Ckap5	A2AGT5	A2AGT5	F:\Yifan\20230908_singletubule_raw\230901_st_93_E2.raw	14464.4	Control_1
Ckap5	A2AGT5	A2AGT5	F:\Yifan\20230908_singletubule_raw\230901_st_93_H7.raw		Control_1
Ckap5	A2AGT5	A2AGT5	F:\Yifan\20230908_singletubule_raw\230901_st_93_F4.raw	20931.1	Control_1
Ckap5	A2AGT5	A2AGT5	F:\Yifan\20230908_singletubule_raw\230901_st_93_H8.raw	15834.1	Control_1
Ckap5	A2AGT5	A2AGT5	F:\Yifan\20230908_singletubule_raw\230901_st_93_D11.raw	22226.6	Control_1
Ckap5	A2AGT5	A2AGT5	F:\Yifan\20230908_singletubule_raw\230901_st_93_C3.raw	17906.2	Control_1
Ckap5	A2AGT5	A2AGT5	F:\Yifan\20230908_singletubule_raw\230901_st_93_D9.raw	21363.2	Control_1
Ckap5	A2AGT5	A2AGT5	F:\Yifan\20230908_singletubule_raw\230901_st_93_F11.raw		Control_1
Ckap5	A2AGT5	A2AGT5	F:\Yifan\20230908_singletubule_raw\230901_st_93_B7.raw	16952.5	Control_1
Ckap5	A2AGT5	A2AGT5	F:\Yifan\20230908_singletubule_raw\230901_st_93_F8.raw	13190.6	Control_1
Ckap5	A2AGT5	A2AGT5	F:\Yifan\20230908_singletubule_raw\230901_st_93_C8.raw	20293.9	Control_1
Ckap5	A2AGT5	A2AGT5	F:\Yifan\20230908_singletubule_raw\230901_st_93_A8.raw		Control_1
Ckap5	A2AGT5	A2AGT5	F:\Yifan\20230908_singletubule_raw\230901_st_93_G3.raw	16977.9	Control_1
Ckap5	A2AGT5	A2AGT5	F:\Yifan\20230908_singletubule_raw\230901_st_93_E1.raw		Control_1
Ckap5	A2AGT5	A2AGT5	F:\Yifan\20230908_singletubule_raw\230901_st_93_C2.raw	30522.5	Control_1
Ckap5	A2AGT5	A2AGT5	F:\Yifan\20230908_singletubule_raw\230901_st_93_B3.raw	16134.6	Control_1
Ckap5	A2AGT5	A2AGT5	F:\Yifan\20230908_singletubule_raw\230901_st_93_A7.raw		Control_1
Ckap5	A2AGT5	A2AGT5	F:\Yifan\20230908_singletubule_raw\230901_st_93_G6.raw		Control_1
Ckap5	A2AGT5	A2AGT5	F:\Yifan\20230908_singletubule_raw\230901_st_93_D7.raw	10910.2	Control_1
Ckap5	A2AGT5	A2AGT5	F:\Yifan\20230908_singletubule_raw\230901_st_93_G1.raw	14666.1	Control_1
Ckap5	A2AGT5	A2AGT5	F:\Yifan\20230908_singletubule_raw\230901_st_93_H6.raw		Control_1
Ckap5	A2AGT5	A2AGT5	F:\Yifan\20230908_singletubule_raw\230901_st_93_A4.raw		Control_1
Ckap5	A2AGT5	A2AGT5	F:\Yifan\20230908_singletubule_raw\230901_st_93_B8.raw		Control_1
Ckap5	A2AGT5	A2AGT5	F:\Yifan\20230908_singletubule_raw\230901_st_93_A3.raw		Control_1
Ckap5	A2AGT5	A2AGT5	F:\Yifan\20230908_singletubule_raw\230901_st_93_A1.raw		Control_1
Ckap5	A2AGT5	A2AGT5	F:\Yifan\20230908_singletubule_raw\230901_st_93_A2.raw		Control_1
Ckap5	A2AGT5	A2AGT5	F:\Yifan\20230908_singletubule_raw\230901_st_93_A6.raw		Control_1
Lzts3	A2AHG0	A2AHG0	F:\Yifan\20230908_singletubule_raw\230901_st_93_E8.raw		Control_1
Lzts3	A2AHG0	A2AHG0	F:\Yifan\20230908_singletubule_raw\230901_st_93_G10.raw		Control_1
Lzts3	A2AHG0	A2AHG0	F:\Yifan\20230908_singletubule_raw\230901_st_93_G11.raw		Control_1
Lzts3	A2AHG0	A2AHG0	F:\Yifan\20230908_singletubule_raw\230901_st_93_H10.raw		Control_1
Lzts3	A2AHG0	A2AHG0	F:\Yifan\20230908_singletubule_raw\230901_st_93_H12.raw	20603.3	Control_1
Lzts3	A2AHG0	A2AHG0	F:\Yifan\20230908_singletubule_raw\230901_st_93_H3.raw	12874	Control_1
Lzts3	A2AHG0	A2AHG0	F:\Yifan\20230908_singletubule_raw\230901_st_93_B6.raw		Control_1
Lzts3	A2AHG0	A2AHG0	F:\Yifan\20230908_singletubule_raw\230901_st_93_H11.raw		Control_1
Lzts3	A2AHG0	A2AHG0	F:\Yifan\20230908_singletubule_raw\230901_st_93_E6.raw		Control_1
Lzts3	A2AHG0	A2AHG0	F:\Yifan\20230908_singletubule_raw\230901_st_93_E7.raw		Control_1
Lzts3	A2AHG0	A2AHG0	F:\Yifan\20230908_singletubule_raw\230901_st_93_G9.raw		Control_1
Lzts3	A2AHG0	A2AHG0	F:\Yifan\20230908_singletubule_raw\230901_st_93_F10.raw		Control_1
Lzts3	A2AHG0	A2AHG0	F:\Yifan\20230908_singletubule_raw\230901_st_93_E9.raw	12299.9	Control_1
Lzts3	A2AHG0	A2AHG0	F:\Yifan\20230908_singletubule_raw\230901_st_93_D10.raw		Control_1
Lzts3	A2AHG0	A2AHG0	F:\Yifan\20230908_singletubule_raw\230901_st_93_F9.raw	16089.7	Control_1
Lzts3	A2AHG0	A2AHG0	F:\Yifan\20230908_singletubule_raw\230901_st_93_G7.raw		Control_1
Lzts3	A2AHG0	A2AHG0	F:\Yifan\20230908_singletubule_raw\230901_st_93_A9.raw	14952.6	Control_1
Lzts3	A2AHG0	A2AHG0	F:\Yifan\20230908_singletubule_raw\230901_st_93_E3.raw		Control_1
Lzts3	A2AHG0	A2AHG0	F:\Yifan\20230908_singletubule_raw\230901_st_93_C7.raw	12782.8	Control_1
Lzts3	A2AHG0	A2AHG0	F:\Yifan\20230908_singletubule_raw\230901_st_93_G4.raw	17204.5	Control_1
Lzts3	A2AHG0	A2AHG0	F:\Yifan\20230908_singletubule_raw\230901_st_93_D3.raw		Control_1
Lzts3	A2AHG0	A2AHG0	F:\Yifan\20230908_singletubule_raw\230901_st_93_F2.raw		Control_1
Lzts3	A2AHG0	A2AHG0	F:\Yifan\20230908_singletubule_raw\230901_st_93_G8.raw		Control_1
Lzts3	A2AHG0	A2AHG0	F:\Yifan\20230908_singletubule_raw\230901_st_93_H4.raw		Control_1
Lzts3	A2AHG0	A2AHG0	F:\Yifan\20230908_singletubule_raw\230901_st_93_D6.raw		Control_1
Lzts3	A2AHG0	A2AHG0	F:\Yifan\20230908_singletubule_raw\230901_st_93_D4.raw		Control_1
Lzts3	A2AHG0	A2AHG0	F:\Yifan\20230908_singletubule_raw\230901_st_93_F12.raw		Control_1
Lzts3	A2AHG0	A2AHG0	F:\Yifan\20230908_singletubule_raw\230901_st_93_C9.raw		Control_1
Lzts3	A2AHG0	A2AHG0	F:\Yifan\20230908_singletubule_raw\230901_st_93_G12.raw		Control_1
Lzts3	A2AHG0	A2AHG0	F:\Yifan\20230908_singletubule_raw\230901_st_93_B10.raw		Control_1
Lzts3	A2AHG0	A2AHG0	F:\Yifan\20230908_singletubule_raw\230901_st_93_B11.raw	13613	Control_1
Lzts3	A2AHG0	A2AHG0	F:\Yifan\20230908_singletubule_raw\230901_st_93_E11.raw		Control_1
Lzts3	A2AHG0	A2AHG0	F:\Yifan\20230908_singletubule_raw\230901_st_93_B12.raw	11291.6	Control_1
Lzts3	A2AHG0	A2AHG0	F:\Yifan\20230908_singletubule_raw\230901_st_93_F3.raw		Control_1
Lzts3	A2AHG0	A2AHG0	F:\Yifan\20230908_singletubule_raw\230901_st_93_B4.raw		Control_1
Lzts3	A2AHG0	A2AHG0	F:\Yifan\20230908_singletubule_raw\230901_st_93_C11.raw		Control_1
Lzts3	A2AHG0	A2AHG0	F:\Yifan\20230908_singletubule_raw\230901_st_93_B2.raw		Control_1
Lzts3	A2AHG0	A2AHG0	F:\Yifan\20230908_singletubule_raw\230901_st_93_H9.raw		Control_1
Lzts3	A2AHG0	A2AHG0	F:\Yifan\20230908_singletubule_raw\230901_st_93_F1.raw		Control_1
Lzts3	A2AHG0	A2AHG0	F:\Yifan\20230908_singletubule_raw\230901_st_93_C12.raw	15418.7	Control_1
Lzts3	A2AHG0	A2AHG0	F:\Yifan\20230908_singletubule_raw\230901_st_93_D2.raw		Control_1
Lzts3	A2AHG0	A2AHG0	F:\Yifan\20230908_singletubule_raw\230901_st_93_H2.raw		Control_1
Lzts3	A2AHG0	A2AHG0	F:\Yifan\20230908_singletubule_raw\230901_st_93_A11.raw		Control_1
Lzts3	A2AHG0	A2AHG0	F:\Yifan\20230908_singletubule_raw\230901_st_93_D1.raw		Control_1
Lzts3	A2AHG0	A2AHG0	F:\Yifan\20230908_singletubule_raw\230901_st_93_F7.raw	19053.5	Control_1
Lzts3	A2AHG0	A2AHG0	F:\Yifan\20230908_singletubule_raw\230901_st_93_E4.raw		Control_1
Lzts3	A2AHG0	A2AHG0	F:\Yifan\20230908_singletubule_raw\230901_st_93_F6.raw	15919.1	Control_1
Lzts3	A2AHG0	A2AHG0	F:\Yifan\20230908_singletubule_raw\230901_st_93_G2.raw		Control_1
Lzts3	A2AHG0	A2AHG0	F:\Yifan\20230908_singletubule_raw\230901_st_93_C10.raw		Control_1
Lzts3	A2AHG0	A2AHG0	F:\Yifan\20230908_singletubule_raw\230901_st_93_E12.raw		Control_1
Lzts3	A2AHG0	A2AHG0	F:\Yifan\20230908_singletubule_raw\230901_st_93_D12.raw	15437.7	Control_1
Lzts3	A2AHG0	A2AHG0	F:\Yifan\20230908_singletubule_raw\230901_st_93_H1.raw		Control_1
Lzts3	A2AHG0	A2AHG0	F:\Yifan\20230908_singletubule_raw\230901_st_93_C4.raw		Control_1
Lzts3	A2AHG0	A2AHG0	F:\Yifan\20230908_singletubule_raw\230901_st_93_A10.raw	16362.9	Control_1
Lzts3	A2AHG0	A2AHG0	F:\Yifan\20230908_singletubule_raw\230901_st_93_B9.raw		Control_1
Lzts3	A2AHG0	A2AHG0	F:\Yifan\20230908_singletubule_raw\230901_st_93_D8.raw		Control_1
Lzts3	A2AHG0	A2AHG0	F:\Yifan\20230908_singletubule_raw\230901_st_93_B1.raw		Control_1
Lzts3	A2AHG0	A2AHG0	F:\Yifan\20230908_singletubule_raw\230901_st_93_A12.raw		Control_1
Lzts3	A2AHG0	A2AHG0	F:\Yifan\20230908_singletubule_raw\230901_st_93_C1.raw		Control_1
Lzts3	A2AHG0	A2AHG0	F:\Yifan\20230908_singletubule_raw\230901_st_93_E10.raw		Control_1
Lzts3	A2AHG0	A2AHG0	F:\Yifan\20230908_singletubule_raw\230901_st_93_E2.raw		Control_1
Lzts3	A2AHG0	A2AHG0	F:\Yifan\20230908_singletubule_raw\230901_st_93_H7.raw		Control_1
Lzts3	A2AHG0	A2AHG0	F:\Yifan\20230908_singletubule_raw\230901_st_93_F4.raw		Control_1
Lzts3	A2AHG0	A2AHG0	F:\Yifan\20230908_singletubule_raw\230901_st_93_H8.raw		Control_1
Lzts3	A2AHG0	A2AHG0	F:\Yifan\20230908_singletubule_raw\230901_st_93_D11.raw		Control_1
Lzts3	A2AHG0	A2AHG0	F:\Yifan\20230908_singletubule_raw\230901_st_93_C3.raw		Control_1
Lzts3	A2AHG0	A2AHG0	F:\Yifan\20230908_singletubule_raw\230901_st_93_D9.raw		Control_1
Lzts3	A2AHG0	A2AHG0	F:\Yifan\20230908_singletubule_raw\230901_st_93_F11.raw		Control_1
Lzts3	A2AHG0	A2AHG0	F:\Yifan\20230908_singletubule_raw\230901_st_93_B7.raw		Control_1
Lzts3	A2AHG0	A2AHG0	F:\Yifan\20230908_singletubule_raw\230901_st_93_F8.raw		Control_1
Lzts3	A2AHG0	A2AHG0	F:\Yifan\20230908_singletubule_raw\230901_st_93_C8.raw		Control_1
Lzts3	A2AHG0	A2AHG0	F:\Yifan\20230908_singletubule_raw\230901_st_93_A8.raw		Control_1
Lzts3	A2AHG0	A2AHG0	F:\Yifan\20230908_singletubule_raw\230901_st_93_G3.raw		Control_1
Lzts3	A2AHG0	A2AHG0	F:\Yifan\20230908_singletubule_raw\230901_st_93_E1.raw		Control_1
Lzts3	A2AHG0	A2AHG0	F:\Yifan\20230908_singletubule_raw\230901_st_93_C2.raw		Control_1
Lzts3	A2AHG0	A2AHG0	F:\Yifan\20230908_singletubule_raw\230901_st_93_B3.raw		Control_1
Lzts3	A2AHG0	A2AHG0	F:\Yifan\20230908_singletubule_raw\230901_st_93_A7.raw		Control_1
Lzts3	A2AHG0	A2AHG0	F:\Yifan\20230908_singletubule_raw\230901_st_93_G6.raw		Control_1
Lzts3	A2AHG0	A2AHG0	F:\Yifan\20230908_singletubule_raw\230901_st_93_D7.raw		Control_1
Lzts3	A2AHG0	A2AHG0	F:\Yifan\20230908_singletubule_raw\230901_st_93_G1.raw		Control_1
Lzts3	A2AHG0	A2AHG0	F:\Yifan\20230908_singletubule_raw\230901_st_93_H6.raw		Control_1
Lzts3	A2AHG0	A2AHG0	F:\Yifan\20230908_singletubule_raw\230901_st_93_A4.raw		Control_1
Lzts3	A2AHG0	A2AHG0	F:\Yifan\20230908_singletubule_raw\230901_st_93_B8.raw		Control_1
Lzts3	A2AHG0	A2AHG0	F:\Yifan\20230908_singletubule_raw\230901_st_93_A3.raw		Control_1
Lzts3	A2AHG0	A2AHG0	F:\Yifan\20230908_singletubule_raw\230901_st_93_A1.raw		Control_1
Lzts3	A2AHG0	A2AHG0	F:\Yifan\20230908_singletubule_raw\230901_st_93_A2.raw		Control_1
Lzts3	A2AHG0	A2AHG0	F:\Yifan\20230908_singletubule_raw\230901_st_93_A6.raw		Control_1
Ndufaf6	A2AIL4	A2AIL4	F:\Yifan\20230908_singletubule_raw\230901_st_93_E8.raw		Control_1
Ndufaf6	A2AIL4	A2AIL4	F:\Yifan\20230908_singletubule_raw\230901_st_93_G10.raw		Control_1
Ndufaf6	A2AIL4	A2AIL4	F:\Yifan\20230908_singletubule_raw\230901_st_93_G11.raw	18399	Control_1
Ndufaf6	A2AIL4	A2AIL4	F:\Yifan\20230908_singletubule_raw\230901_st_93_H10.raw	16881.3	Control_1
Ndufaf6	A2AIL4	A2AIL4	F:\Yifan\20230908_singletubule_raw\230901_st_93_H12.raw	41874.8	Control_1
Ndufaf6	A2AIL4	A2AIL4	F:\Yifan\20230908_singletubule_raw\230901_st_93_H3.raw	15775.2	Control_1
Ndufaf6	A2AIL4	A2AIL4	F:\Yifan\20230908_singletubule_raw\230901_st_93_B6.raw	18610.9	Control_1
Ndufaf6	A2AIL4	A2AIL4	F:\Yifan\20230908_singletubule_raw\230901_st_93_H11.raw		Control_1
Ndufaf6	A2AIL4	A2AIL4	F:\Yifan\20230908_singletubule_raw\230901_st_93_E6.raw	16400.4	Control_1
Ndufaf6	A2AIL4	A2AIL4	F:\Yifan\20230908_singletubule_raw\230901_st_93_E7.raw	23125.7	Control_1
Ndufaf6	A2AIL4	A2AIL4	F:\Yifan\20230908_singletubule_raw\230901_st_93_G9.raw		Control_1
Ndufaf6	A2AIL4	A2AIL4	F:\Yifan\20230908_singletubule_raw\230901_st_93_F10.raw	45302	Control_1
Ndufaf6	A2AIL4	A2AIL4	F:\Yifan\20230908_singletubule_raw\230901_st_93_E9.raw	25022	Control_1
Ndufaf6	A2AIL4	A2AIL4	F:\Yifan\20230908_singletubule_raw\230901_st_93_D10.raw	38102.2	Control_1
Ndufaf6	A2AIL4	A2AIL4	F:\Yifan\20230908_singletubule_raw\230901_st_93_F9.raw	8571.9	Control_1
Ndufaf6	A2AIL4	A2AIL4	F:\Yifan\20230908_singletubule_raw\230901_st_93_G7.raw	11872.7	Control_1
Ndufaf6	A2AIL4	A2AIL4	F:\Yifan\20230908_singletubule_raw\230901_st_93_A9.raw	33940.5	Control_1
Ndufaf6	A2AIL4	A2AIL4	F:\Yifan\20230908_singletubule_raw\230901_st_93_E3.raw		Control_1
Ndufaf6	A2AIL4	A2AIL4	F:\Yifan\20230908_singletubule_raw\230901_st_93_C7.raw	8728.27	Control_1
Ndufaf6	A2AIL4	A2AIL4	F:\Yifan\20230908_singletubule_raw\230901_st_93_G4.raw	29076.4	Control_1
Ndufaf6	A2AIL4	A2AIL4	F:\Yifan\20230908_singletubule_raw\230901_st_93_D3.raw		Control_1
Ndufaf6	A2AIL4	A2AIL4	F:\Yifan\20230908_singletubule_raw\230901_st_93_F2.raw	34725.1	Control_1
Ndufaf6	A2AIL4	A2AIL4	F:\Yifan\20230908_singletubule_raw\230901_st_93_G8.raw	3288.19	Control_1
Ndufaf6	A2AIL4	A2AIL4	F:\Yifan\20230908_singletubule_raw\230901_st_93_H4.raw	32244	Control_1
Ndufaf6	A2AIL4	A2AIL4	F:\Yifan\20230908_singletubule_raw\230901_st_93_D6.raw	26927.8	Control_1
Ndufaf6	A2AIL4	A2AIL4	F:\Yifan\20230908_singletubule_raw\230901_st_93_D4.raw	6444.23	Control_1
Ndufaf6	A2AIL4	A2AIL4	F:\Yifan\20230908_singletubule_raw\230901_st_93_F12.raw		Control_1
Ndufaf6	A2AIL4	A2AIL4	F:\Yifan\20230908_singletubule_raw\230901_st_93_C9.raw	32481.4	Control_1
Ndufaf6	A2AIL4	A2AIL4	F:\Yifan\20230908_singletubule_raw\230901_st_93_G12.raw	38541.8	Control_1
Ndufaf6	A2AIL4	A2AIL4	F:\Yifan\20230908_singletubule_raw\230901_st_93_B10.raw	36495	Control_1
Ndufaf6	A2AIL4	A2AIL4	F:\Yifan\20230908_singletubule_raw\230901_st_93_B11.raw	13203.4	Control_1
Ndufaf6	A2AIL4	A2AIL4	F:\Yifan\20230908_singletubule_raw\230901_st_93_E11.raw		Control_1
Ndufaf6	A2AIL4	A2AIL4	F:\Yifan\20230908_singletubule_raw\230901_st_93_B12.raw	30743.6	Control_1
Ndufaf6	A2AIL4	A2AIL4	F:\Yifan\20230908_singletubule_raw\230901_st_93_F3.raw		Control_1
Ndufaf6	A2AIL4	A2AIL4	F:\Yifan\20230908_singletubule_raw\230901_st_93_B4.raw	41015.1	Control_1
Ndufaf6	A2AIL4	A2AIL4	F:\Yifan\20230908_singletubule_raw\230901_st_93_C11.raw	34454.3	Control_1
Ndufaf6	A2AIL4	A2AIL4	F:\Yifan\20230908_singletubule_raw\230901_st_93_B2.raw	24444.1	Control_1
Ndufaf6	A2AIL4	A2AIL4	F:\Yifan\20230908_singletubule_raw\230901_st_93_H9.raw	26334.3	Control_1
Ndufaf6	A2AIL4	A2AIL4	F:\Yifan\20230908_singletubule_raw\230901_st_93_F1.raw		Control_1
Ndufaf6	A2AIL4	A2AIL4	F:\Yifan\20230908_singletubule_raw\230901_st_93_C12.raw		Control_1
Ndufaf6	A2AIL4	A2AIL4	F:\Yifan\20230908_singletubule_raw\230901_st_93_D2.raw	26441.6	Control_1
Ndufaf6	A2AIL4	A2AIL4	F:\Yifan\20230908_singletubule_raw\230901_st_93_H2.raw	22815	Control_1
Ndufaf6	A2AIL4	A2AIL4	F:\Yifan\20230908_singletubule_raw\230901_st_93_A11.raw	45274.5	Control_1
Ndufaf6	A2AIL4	A2AIL4	F:\Yifan\20230908_singletubule_raw\230901_st_93_D1.raw	54060.6	Control_1
Ndufaf6	A2AIL4	A2AIL4	F:\Yifan\20230908_singletubule_raw\230901_st_93_F7.raw	8055.64	Control_1
Ndufaf6	A2AIL4	A2AIL4	F:\Yifan\20230908_singletubule_raw\230901_st_93_E4.raw		Control_1
Ndufaf6	A2AIL4	A2AIL4	F:\Yifan\20230908_singletubule_raw\230901_st_93_F6.raw	40773.8	Control_1
Ndufaf6	A2AIL4	A2AIL4	F:\Yifan\20230908_singletubule_raw\230901_st_93_G2.raw	28163	Control_1
Ndufaf6	A2AIL4	A2AIL4	F:\Yifan\20230908_singletubule_raw\230901_st_93_C10.raw		Control_1
Ndufaf6	A2AIL4	A2AIL4	F:\Yifan\20230908_singletubule_raw\230901_st_93_E12.raw	22714.2	Control_1
Ndufaf6	A2AIL4	A2AIL4	F:\Yifan\20230908_singletubule_raw\230901_st_93_D12.raw		Control_1
Ndufaf6	A2AIL4	A2AIL4	F:\Yifan\20230908_singletubule_raw\230901_st_93_H1.raw		Control_1
Ndufaf6	A2AIL4	A2AIL4	F:\Yifan\20230908_singletubule_raw\230901_st_93_C4.raw	15457	Control_1
Ndufaf6	A2AIL4	A2AIL4	F:\Yifan\20230908_singletubule_raw\230901_st_93_A10.raw	35034.7	Control_1
Ndufaf6	A2AIL4	A2AIL4	F:\Yifan\20230908_singletubule_raw\230901_st_93_B9.raw	28660.6	Control_1
Ndufaf6	A2AIL4	A2AIL4	F:\Yifan\20230908_singletubule_raw\230901_st_93_D8.raw	18588.1	Control_1
Ndufaf6	A2AIL4	A2AIL4	F:\Yifan\20230908_singletubule_raw\230901_st_93_B1.raw		Control_1
Ndufaf6	A2AIL4	A2AIL4	F:\Yifan\20230908_singletubule_raw\230901_st_93_A12.raw	48921.1	Control_1
Ndufaf6	A2AIL4	A2AIL4	F:\Yifan\20230908_singletubule_raw\230901_st_93_C1.raw	14434.6	Control_1
Ndufaf6	A2AIL4	A2AIL4	F:\Yifan\20230908_singletubule_raw\230901_st_93_E10.raw	37740	Control_1
Ndufaf6	A2AIL4	A2AIL4	F:\Yifan\20230908_singletubule_raw\230901_st_93_E2.raw		Control_1
Ndufaf6	A2AIL4	A2AIL4	F:\Yifan\20230908_singletubule_raw\230901_st_93_H7.raw		Control_1
Ndufaf6	A2AIL4	A2AIL4	F:\Yifan\20230908_singletubule_raw\230901_st_93_F4.raw	25406.3	Control_1
Ndufaf6	A2AIL4	A2AIL4	F:\Yifan\20230908_singletubule_raw\230901_st_93_H8.raw	20726.3	Control_1
Ndufaf6	A2AIL4	A2AIL4	F:\Yifan\20230908_singletubule_raw\230901_st_93_D11.raw		Control_1
Ndufaf6	A2AIL4	A2AIL4	F:\Yifan\20230908_singletubule_raw\230901_st_93_C3.raw	32839.2	Control_1
Ndufaf6	A2AIL4	A2AIL4	F:\Yifan\20230908_singletubule_raw\230901_st_93_D9.raw	34502.6	Control_1
Ndufaf6	A2AIL4	A2AIL4	F:\Yifan\20230908_singletubule_raw\230901_st_93_F11.raw		Control_1
Ndufaf6	A2AIL4	A2AIL4	F:\Yifan\20230908_singletubule_raw\230901_st_93_B7.raw		Control_1
Ndufaf6	A2AIL4	A2AIL4	F:\Yifan\20230908_singletubule_raw\230901_st_93_F8.raw	15843.9	Control_1
Ndufaf6	A2AIL4	A2AIL4	F:\Yifan\20230908_singletubule_raw\230901_st_93_C8.raw		Control_1
Ndufaf6	A2AIL4	A2AIL4	F:\Yifan\20230908_singletubule_raw\230901_st_93_A8.raw		Control_1
Ndufaf6	A2AIL4	A2AIL4	F:\Yifan\20230908_singletubule_raw\230901_st_93_G3.raw		Control_1
Ndufaf6	A2AIL4	A2AIL4	F:\Yifan\20230908_singletubule_raw\230901_st_93_E1.raw	48433.3	Control_1
Ndufaf6	A2AIL4	A2AIL4	F:\Yifan\20230908_singletubule_raw\230901_st_93_C2.raw		Control_1
Ndufaf6	A2AIL4	A2AIL4	F:\Yifan\20230908_singletubule_raw\230901_st_93_B3.raw		Control_1
Ndufaf6	A2AIL4	A2AIL4	F:\Yifan\20230908_singletubule_raw\230901_st_93_A7.raw		Control_1
Ndufaf6	A2AIL4	A2AIL4	F:\Yifan\20230908_singletubule_raw\230901_st_93_G6.raw	24992.1	Control_1
Ndufaf6	A2AIL4	A2AIL4	F:\Yifan\20230908_singletubule_raw\230901_st_93_D7.raw	10528.6	Control_1
Ndufaf6	A2AIL4	A2AIL4	F:\Yifan\20230908_singletubule_raw\230901_st_93_G1.raw	11447.4	Control_1
Ndufaf6	A2AIL4	A2AIL4	F:\Yifan\20230908_singletubule_raw\230901_st_93_H6.raw		Control_1
Ndufaf6	A2AIL4	A2AIL4	F:\Yifan\20230908_singletubule_raw\230901_st_93_A4.raw		Control_1
Ndufaf6	A2AIL4	A2AIL4	F:\Yifan\20230908_singletubule_raw\230901_st_93_B8.raw		Control_1
Ndufaf6	A2AIL4	A2AIL4	F:\Yifan\20230908_singletubule_raw\230901_st_93_A3.raw		Control_1
Ndufaf6	A2AIL4	A2AIL4	F:\Yifan\20230908_singletubule_raw\230901_st_93_A1.raw		Control_1
Ndufaf6	A2AIL4	A2AIL4	F:\Yifan\20230908_singletubule_raw\230901_st_93_A2.raw		Control_1
Ndufaf6	A2AIL4	A2AIL4	F:\Yifan\20230908_singletubule_raw\230901_st_93_A6.raw		Control_1
Fggy	A2AJL3	A2AJL3	F:\Yifan\20230908_singletubule_raw\230901_st_93_E8.raw	4082.24	Control_1
Fggy	A2AJL3	A2AJL3	F:\Yifan\20230908_singletubule_raw\230901_st_93_G10.raw	21561.7	Control_1
Fggy	A2AJL3	A2AJL3	F:\Yifan\20230908_singletubule_raw\230901_st_93_G11.raw	13047.5	Control_1
Fggy	A2AJL3	A2AJL3	F:\Yifan\20230908_singletubule_raw\230901_st_93_H10.raw	18616.6	Control_1
Fggy	A2AJL3	A2AJL3	F:\Yifan\20230908_singletubule_raw\230901_st_93_H12.raw	15319.8	Control_1
Fggy	A2AJL3	A2AJL3	F:\Yifan\20230908_singletubule_raw\230901_st_93_H3.raw	13667.9	Control_1
Fggy	A2AJL3	A2AJL3	F:\Yifan\20230908_singletubule_raw\230901_st_93_B6.raw	8826.83	Control_1
Fggy	A2AJL3	A2AJL3	F:\Yifan\20230908_singletubule_raw\230901_st_93_H11.raw	10377.4	Control_1
Fggy	A2AJL3	A2AJL3	F:\Yifan\20230908_singletubule_raw\230901_st_93_E6.raw	13979	Control_1
Fggy	A2AJL3	A2AJL3	F:\Yifan\20230908_singletubule_raw\230901_st_93_E7.raw	5032.71	Control_1
Fggy	A2AJL3	A2AJL3	F:\Yifan\20230908_singletubule_raw\230901_st_93_G9.raw	11927.3	Control_1
Fggy	A2AJL3	A2AJL3	F:\Yifan\20230908_singletubule_raw\230901_st_93_F10.raw	7410.69	Control_1
Fggy	A2AJL3	A2AJL3	F:\Yifan\20230908_singletubule_raw\230901_st_93_E9.raw	17770.1	Control_1
Fggy	A2AJL3	A2AJL3	F:\Yifan\20230908_singletubule_raw\230901_st_93_D10.raw	15131.8	Control_1
Fggy	A2AJL3	A2AJL3	F:\Yifan\20230908_singletubule_raw\230901_st_93_F9.raw	16458.9	Control_1
Fggy	A2AJL3	A2AJL3	F:\Yifan\20230908_singletubule_raw\230901_st_93_G7.raw	18985.1	Control_1
Fggy	A2AJL3	A2AJL3	F:\Yifan\20230908_singletubule_raw\230901_st_93_A9.raw	17082.2	Control_1
Fggy	A2AJL3	A2AJL3	F:\Yifan\20230908_singletubule_raw\230901_st_93_E3.raw	17250.6	Control_1
Fggy	A2AJL3	A2AJL3	F:\Yifan\20230908_singletubule_raw\230901_st_93_C7.raw	22463.8	Control_1
Fggy	A2AJL3	A2AJL3	F:\Yifan\20230908_singletubule_raw\230901_st_93_G4.raw	19558	Control_1
Fggy	A2AJL3	A2AJL3	F:\Yifan\20230908_singletubule_raw\230901_st_93_D3.raw	6124.16	Control_1
Fggy	A2AJL3	A2AJL3	F:\Yifan\20230908_singletubule_raw\230901_st_93_F2.raw	18390.2	Control_1
Fggy	A2AJL3	A2AJL3	F:\Yifan\20230908_singletubule_raw\230901_st_93_G8.raw	9374.59	Control_1
Fggy	A2AJL3	A2AJL3	F:\Yifan\20230908_singletubule_raw\230901_st_93_H4.raw	17783.5	Control_1
Fggy	A2AJL3	A2AJL3	F:\Yifan\20230908_singletubule_raw\230901_st_93_D6.raw	14352.1	Control_1
Fggy	A2AJL3	A2AJL3	F:\Yifan\20230908_singletubule_raw\230901_st_93_D4.raw	17862.9	Control_1
Fggy	A2AJL3	A2AJL3	F:\Yifan\20230908_singletubule_raw\230901_st_93_F12.raw	11014.8	Control_1
Fggy	A2AJL3	A2AJL3	F:\Yifan\20230908_singletubule_raw\230901_st_93_C9.raw	14224.6	Control_1
Fggy	A2AJL3	A2AJL3	F:\Yifan\20230908_singletubule_raw\230901_st_93_G12.raw	12178	Control_1
Fggy	A2AJL3	A2AJL3	F:\Yifan\20230908_singletubule_raw\230901_st_93_B10.raw	12307.2	Control_1
Fggy	A2AJL3	A2AJL3	F:\Yifan\20230908_singletubule_raw\230901_st_93_B11.raw	22355.8	Control_1
Fggy	A2AJL3	A2AJL3	F:\Yifan\20230908_singletubule_raw\230901_st_93_E11.raw	10344.2	Control_1
Fggy	A2AJL3	A2AJL3	F:\Yifan\20230908_singletubule_raw\230901_st_93_B12.raw	15689.2	Control_1
Fggy	A2AJL3	A2AJL3	F:\Yifan\20230908_singletubule_raw\230901_st_93_F3.raw	11251.1	Control_1
Fggy	A2AJL3	A2AJL3	F:\Yifan\20230908_singletubule_raw\230901_st_93_B4.raw	11211.9	Control_1
Fggy	A2AJL3	A2AJL3	F:\Yifan\20230908_singletubule_raw\230901_st_93_C11.raw	18231.7	Control_1
Fggy	A2AJL3	A2AJL3	F:\Yifan\20230908_singletubule_raw\230901_st_93_B2.raw	10556.2	Control_1
Fggy	A2AJL3	A2AJL3	F:\Yifan\20230908_singletubule_raw\230901_st_93_H9.raw		Control_1
Fggy	A2AJL3	A2AJL3	F:\Yifan\20230908_singletubule_raw\230901_st_93_F1.raw	17250.9	Control_1
Fggy	A2AJL3	A2AJL3	F:\Yifan\20230908_singletubule_raw\230901_st_93_C12.raw	16247.8	Control_1
Fggy	A2AJL3	A2AJL3	F:\Yifan\20230908_singletubule_raw\230901_st_93_D2.raw	18331.3	Control_1
Fggy	A2AJL3	A2AJL3	F:\Yifan\20230908_singletubule_raw\230901_st_93_H2.raw	18843.2	Control_1
Fggy	A2AJL3	A2AJL3	F:\Yifan\20230908_singletubule_raw\230901_st_93_A11.raw	14902	Control_1
Fggy	A2AJL3	A2AJL3	F:\Yifan\20230908_singletubule_raw\230901_st_93_D1.raw	1948.77	Control_1
Fggy	A2AJL3	A2AJL3	F:\Yifan\20230908_singletubule_raw\230901_st_93_F7.raw	22535.3	Control_1
Fggy	A2AJL3	A2AJL3	F:\Yifan\20230908_singletubule_raw\230901_st_93_E4.raw	13260.6	Control_1
Fggy	A2AJL3	A2AJL3	F:\Yifan\20230908_singletubule_raw\230901_st_93_F6.raw		Control_1
Fggy	A2AJL3	A2AJL3	F:\Yifan\20230908_singletubule_raw\230901_st_93_G2.raw	9929.32	Control_1
Fggy	A2AJL3	A2AJL3	F:\Yifan\20230908_singletubule_raw\230901_st_93_C10.raw	7327.28	Control_1
Fggy	A2AJL3	A2AJL3	F:\Yifan\20230908_singletubule_raw\230901_st_93_E12.raw	9069.58	Control_1
Fggy	A2AJL3	A2AJL3	F:\Yifan\20230908_singletubule_raw\230901_st_93_D12.raw	22347.8	Control_1
Fggy	A2AJL3	A2AJL3	F:\Yifan\20230908_singletubule_raw\230901_st_93_H1.raw	13237.9	Control_1
Fggy	A2AJL3	A2AJL3	F:\Yifan\20230908_singletubule_raw\230901_st_93_C4.raw	7791.2	Control_1
Fggy	A2AJL3	A2AJL3	F:\Yifan\20230908_singletubule_raw\230901_st_93_A10.raw	22134.4	Control_1
Fggy	A2AJL3	A2AJL3	F:\Yifan\20230908_singletubule_raw\230901_st_93_B9.raw	7141.21	Control_1
Fggy	A2AJL3	A2AJL3	F:\Yifan\20230908_singletubule_raw\230901_st_93_D8.raw		Control_1
Fggy	A2AJL3	A2AJL3	F:\Yifan\20230908_singletubule_raw\230901_st_93_B1.raw	20102.8	Control_1
Fggy	A2AJL3	A2AJL3	F:\Yifan\20230908_singletubule_raw\230901_st_93_A12.raw	18655.6	Control_1
Fggy	A2AJL3	A2AJL3	F:\Yifan\20230908_singletubule_raw\230901_st_93_C1.raw	7697.29	Control_1
Fggy	A2AJL3	A2AJL3	F:\Yifan\20230908_singletubule_raw\230901_st_93_E10.raw	23442.3	Control_1
Fggy	A2AJL3	A2AJL3	F:\Yifan\20230908_singletubule_raw\230901_st_93_E2.raw	11202.8	Control_1
Fggy	A2AJL3	A2AJL3	F:\Yifan\20230908_singletubule_raw\230901_st_93_H7.raw		Control_1
Fggy	A2AJL3	A2AJL3	F:\Yifan\20230908_singletubule_raw\230901_st_93_F4.raw		Control_1
Fggy	A2AJL3	A2AJL3	F:\Yifan\20230908_singletubule_raw\230901_st_93_H8.raw		Control_1
Fggy	A2AJL3	A2AJL3	F:\Yifan\20230908_singletubule_raw\230901_st_93_D11.raw	5396.98	Control_1
Fggy	A2AJL3	A2AJL3	F:\Yifan\20230908_singletubule_raw\230901_st_93_C3.raw	34763.2	Control_1
Fggy	A2AJL3	A2AJL3	F:\Yifan\20230908_singletubule_raw\230901_st_93_D9.raw	28581.6	Control_1
Fggy	A2AJL3	A2AJL3	F:\Yifan\20230908_singletubule_raw\230901_st_93_F11.raw	26739.4	Control_1
Fggy	A2AJL3	A2AJL3	F:\Yifan\20230908_singletubule_raw\230901_st_93_B7.raw	15483.5	Control_1
Fggy	A2AJL3	A2AJL3	F:\Yifan\20230908_singletubule_raw\230901_st_93_F8.raw		Control_1
Fggy	A2AJL3	A2AJL3	F:\Yifan\20230908_singletubule_raw\230901_st_93_C8.raw		Control_1
Fggy	A2AJL3	A2AJL3	F:\Yifan\20230908_singletubule_raw\230901_st_93_A8.raw		Control_1
Fggy	A2AJL3	A2AJL3	F:\Yifan\20230908_singletubule_raw\230901_st_93_G3.raw		Control_1
Fggy	A2AJL3	A2AJL3	F:\Yifan\20230908_singletubule_raw\230901_st_93_E1.raw	14506.2	Control_1
Fggy	A2AJL3	A2AJL3	F:\Yifan\20230908_singletubule_raw\230901_st_93_C2.raw		Control_1
Fggy	A2AJL3	A2AJL3	F:\Yifan\20230908_singletubule_raw\230901_st_93_B3.raw		Control_1
Fggy	A2AJL3	A2AJL3	F:\Yifan\20230908_singletubule_raw\230901_st_93_A7.raw		Control_1
Fggy	A2AJL3	A2AJL3	F:\Yifan\20230908_singletubule_raw\230901_st_93_G6.raw		Control_1
Fggy	A2AJL3	A2AJL3	F:\Yifan\20230908_singletubule_raw\230901_st_93_D7.raw		Control_1
Fggy	A2AJL3	A2AJL3	F:\Yifan\20230908_singletubule_raw\230901_st_93_G1.raw		Control_1
Fggy	A2AJL3	A2AJL3	F:\Yifan\20230908_singletubule_raw\230901_st_93_H6.raw		Control_1
Fggy	A2AJL3	A2AJL3	F:\Yifan\20230908_singletubule_raw\230901_st_93_A4.raw		Control_1
Fggy	A2AJL3	A2AJL3	F:\Yifan\20230908_singletubule_raw\230901_st_93_B8.raw		Control_1
Fggy	A2AJL3	A2AJL3	F:\Yifan\20230908_singletubule_raw\230901_st_93_A3.raw		Control_1
Fggy	A2AJL3	A2AJL3	F:\Yifan\20230908_singletubule_raw\230901_st_93_A1.raw		Control_1
Fggy	A2AJL3	A2AJL3	F:\Yifan\20230908_singletubule_raw\230901_st_93_A2.raw		Control_1
Fggy	A2AJL3	A2AJL3	F:\Yifan\20230908_singletubule_raw\230901_st_93_A6.raw		Control_1
Rap1gap	A2ALS5	A2ALS5	F:\Yifan\20230908_singletubule_raw\230901_st_93_E8.raw	42089.7	Control_1
Rap1gap	A2ALS5	A2ALS5	F:\Yifan\20230908_singletubule_raw\230901_st_93_G10.raw		Control_1
Rap1gap	A2ALS5	A2ALS5	F:\Yifan\20230908_singletubule_raw\230901_st_93_G11.raw	29746.9	Control_1
Rap1gap	A2ALS5	A2ALS5	F:\Yifan\20230908_singletubule_raw\230901_st_93_H10.raw	18431.4	Control_1
Rap1gap	A2ALS5	A2ALS5	F:\Yifan\20230908_singletubule_raw\230901_st_93_H12.raw		Control_1
Rap1gap	A2ALS5	A2ALS5	F:\Yifan\20230908_singletubule_raw\230901_st_93_H3.raw	28191.1	Control_1
Rap1gap	A2ALS5	A2ALS5	F:\Yifan\20230908_singletubule_raw\230901_st_93_B6.raw	22155.9	Control_1
Rap1gap	A2ALS5	A2ALS5	F:\Yifan\20230908_singletubule_raw\230901_st_93_H11.raw	15698.5	Control_1
Rap1gap	A2ALS5	A2ALS5	F:\Yifan\20230908_singletubule_raw\230901_st_93_E6.raw		Control_1
Rap1gap	A2ALS5	A2ALS5	F:\Yifan\20230908_singletubule_raw\230901_st_93_E7.raw	27951.4	Control_1
Rap1gap	A2ALS5	A2ALS5	F:\Yifan\20230908_singletubule_raw\230901_st_93_G9.raw	19606	Control_1
Rap1gap	A2ALS5	A2ALS5	F:\Yifan\20230908_singletubule_raw\230901_st_93_F10.raw	35926.8	Control_1
Rap1gap	A2ALS5	A2ALS5	F:\Yifan\20230908_singletubule_raw\230901_st_93_E9.raw	24712.3	Control_1
Rap1gap	A2ALS5	A2ALS5	F:\Yifan\20230908_singletubule_raw\230901_st_93_D10.raw	10697.5	Control_1
Rap1gap	A2ALS5	A2ALS5	F:\Yifan\20230908_singletubule_raw\230901_st_93_F9.raw		Control_1
Rap1gap	A2ALS5	A2ALS5	F:\Yifan\20230908_singletubule_raw\230901_st_93_G7.raw	22899.7	Control_1
Rap1gap	A2ALS5	A2ALS5	F:\Yifan\20230908_singletubule_raw\230901_st_93_A9.raw		Control_1
Rap1gap	A2ALS5	A2ALS5	F:\Yifan\20230908_singletubule_raw\230901_st_93_E3.raw	38485.3	Control_1
Rap1gap	A2ALS5	A2ALS5	F:\Yifan\20230908_singletubule_raw\230901_st_93_C7.raw		Control_1
Rap1gap	A2ALS5	A2ALS5	F:\Yifan\20230908_singletubule_raw\230901_st_93_G4.raw	24357.7	Control_1
Rap1gap	A2ALS5	A2ALS5	F:\Yifan\20230908_singletubule_raw\230901_st_93_D3.raw	16812.2	Control_1
Rap1gap	A2ALS5	A2ALS5	F:\Yifan\20230908_singletubule_raw\230901_st_93_F2.raw		Control_1
Rap1gap	A2ALS5	A2ALS5	F:\Yifan\20230908_singletubule_raw\230901_st_93_G8.raw	18275.4	Control_1
Rap1gap	A2ALS5	A2ALS5	F:\Yifan\20230908_singletubule_raw\230901_st_93_H4.raw		Control_1
Rap1gap	A2ALS5	A2ALS5	F:\Yifan\20230908_singletubule_raw\230901_st_93_D6.raw		Control_1
Rap1gap	A2ALS5	A2ALS5	F:\Yifan\20230908_singletubule_raw\230901_st_93_D4.raw		Control_1
Rap1gap	A2ALS5	A2ALS5	F:\Yifan\20230908_singletubule_raw\230901_st_93_F12.raw	17030.1	Control_1
Rap1gap	A2ALS5	A2ALS5	F:\Yifan\20230908_singletubule_raw\230901_st_93_C9.raw		Control_1
Rap1gap	A2ALS5	A2ALS5	F:\Yifan\20230908_singletubule_raw\230901_st_93_G12.raw		Control_1
Rap1gap	A2ALS5	A2ALS5	F:\Yifan\20230908_singletubule_raw\230901_st_93_B10.raw		Control_1
Rap1gap	A2ALS5	A2ALS5	F:\Yifan\20230908_singletubule_raw\230901_st_93_B11.raw		Control_1
Rap1gap	A2ALS5	A2ALS5	F:\Yifan\20230908_singletubule_raw\230901_st_93_E11.raw	21595.1	Control_1
Rap1gap	A2ALS5	A2ALS5	F:\Yifan\20230908_singletubule_raw\230901_st_93_B12.raw		Control_1
Rap1gap	A2ALS5	A2ALS5	F:\Yifan\20230908_singletubule_raw\230901_st_93_F3.raw	11009.5	Control_1
Rap1gap	A2ALS5	A2ALS5	F:\Yifan\20230908_singletubule_raw\230901_st_93_B4.raw		Control_1
Rap1gap	A2ALS5	A2ALS5	F:\Yifan\20230908_singletubule_raw\230901_st_93_C11.raw		Control_1
Rap1gap	A2ALS5	A2ALS5	F:\Yifan\20230908_singletubule_raw\230901_st_93_B2.raw		Control_1
Rap1gap	A2ALS5	A2ALS5	F:\Yifan\20230908_singletubule_raw\230901_st_93_H9.raw	29676.6	Control_1
Rap1gap	A2ALS5	A2ALS5	F:\Yifan\20230908_singletubule_raw\230901_st_93_F1.raw		Control_1
Rap1gap	A2ALS5	A2ALS5	F:\Yifan\20230908_singletubule_raw\230901_st_93_C12.raw		Control_1
Rap1gap	A2ALS5	A2ALS5	F:\Yifan\20230908_singletubule_raw\230901_st_93_D2.raw		Control_1
Rap1gap	A2ALS5	A2ALS5	F:\Yifan\20230908_singletubule_raw\230901_st_93_H2.raw		Control_1
Rap1gap	A2ALS5	A2ALS5	F:\Yifan\20230908_singletubule_raw\230901_st_93_A11.raw		Control_1
Rap1gap	A2ALS5	A2ALS5	F:\Yifan\20230908_singletubule_raw\230901_st_93_D1.raw		Control_1
Rap1gap	A2ALS5	A2ALS5	F:\Yifan\20230908_singletubule_raw\230901_st_93_F7.raw		Control_1
Rap1gap	A2ALS5	A2ALS5	F:\Yifan\20230908_singletubule_raw\230901_st_93_E4.raw		Control_1
Rap1gap	A2ALS5	A2ALS5	F:\Yifan\20230908_singletubule_raw\230901_st_93_F6.raw		Control_1
Rap1gap	A2ALS5	A2ALS5	F:\Yifan\20230908_singletubule_raw\230901_st_93_G2.raw		Control_1
Rap1gap	A2ALS5	A2ALS5	F:\Yifan\20230908_singletubule_raw\230901_st_93_C10.raw		Control_1
Rap1gap	A2ALS5	A2ALS5	F:\Yifan\20230908_singletubule_raw\230901_st_93_E12.raw		Control_1
Rap1gap	A2ALS5	A2ALS5	F:\Yifan\20230908_singletubule_raw\230901_st_93_D12.raw		Control_1
Rap1gap	A2ALS5	A2ALS5	F:\Yifan\20230908_singletubule_raw\230901_st_93_H1.raw	17930.5	Control_1
Rap1gap	A2ALS5	A2ALS5	F:\Yifan\20230908_singletubule_raw\230901_st_93_C4.raw		Control_1
Rap1gap	A2ALS5	A2ALS5	F:\Yifan\20230908_singletubule_raw\230901_st_93_A10.raw		Control_1
Rap1gap	A2ALS5	A2ALS5	F:\Yifan\20230908_singletubule_raw\230901_st_93_B9.raw		Control_1
Rap1gap	A2ALS5	A2ALS5	F:\Yifan\20230908_singletubule_raw\230901_st_93_D8.raw	21475.9	Control_1
Rap1gap	A2ALS5	A2ALS5	F:\Yifan\20230908_singletubule_raw\230901_st_93_B1.raw		Control_1
Rap1gap	A2ALS5	A2ALS5	F:\Yifan\20230908_singletubule_raw\230901_st_93_A12.raw		Control_1
Rap1gap	A2ALS5	A2ALS5	F:\Yifan\20230908_singletubule_raw\230901_st_93_C1.raw		Control_1
Rap1gap	A2ALS5	A2ALS5	F:\Yifan\20230908_singletubule_raw\230901_st_93_E10.raw		Control_1
Rap1gap	A2ALS5	A2ALS5	F:\Yifan\20230908_singletubule_raw\230901_st_93_E2.raw	24001.7	Control_1
Rap1gap	A2ALS5	A2ALS5	F:\Yifan\20230908_singletubule_raw\230901_st_93_H7.raw		Control_1
Rap1gap	A2ALS5	A2ALS5	F:\Yifan\20230908_singletubule_raw\230901_st_93_F4.raw		Control_1
Rap1gap	A2ALS5	A2ALS5	F:\Yifan\20230908_singletubule_raw\230901_st_93_H8.raw		Control_1
Rap1gap	A2ALS5	A2ALS5	F:\Yifan\20230908_singletubule_raw\230901_st_93_D11.raw		Control_1
Rap1gap	A2ALS5	A2ALS5	F:\Yifan\20230908_singletubule_raw\230901_st_93_C3.raw		Control_1
Rap1gap	A2ALS5	A2ALS5	F:\Yifan\20230908_singletubule_raw\230901_st_93_D9.raw		Control_1
Rap1gap	A2ALS5	A2ALS5	F:\Yifan\20230908_singletubule_raw\230901_st_93_F11.raw		Control_1
Rap1gap	A2ALS5	A2ALS5	F:\Yifan\20230908_singletubule_raw\230901_st_93_B7.raw		Control_1
Rap1gap	A2ALS5	A2ALS5	F:\Yifan\20230908_singletubule_raw\230901_st_93_F8.raw		Control_1
Rap1gap	A2ALS5	A2ALS5	F:\Yifan\20230908_singletubule_raw\230901_st_93_C8.raw		Control_1
Rap1gap	A2ALS5	A2ALS5	F:\Yifan\20230908_singletubule_raw\230901_st_93_A8.raw		Control_1
Rap1gap	A2ALS5	A2ALS5	F:\Yifan\20230908_singletubule_raw\230901_st_93_G3.raw		Control_1
Rap1gap	A2ALS5	A2ALS5	F:\Yifan\20230908_singletubule_raw\230901_st_93_E1.raw		Control_1
Rap1gap	A2ALS5	A2ALS5	F:\Yifan\20230908_singletubule_raw\230901_st_93_C2.raw	31298.3	Control_1
Rap1gap	A2ALS5	A2ALS5	F:\Yifan\20230908_singletubule_raw\230901_st_93_B3.raw		Control_1
Rap1gap	A2ALS5	A2ALS5	F:\Yifan\20230908_singletubule_raw\230901_st_93_A7.raw		Control_1
Rap1gap	A2ALS5	A2ALS5	F:\Yifan\20230908_singletubule_raw\230901_st_93_G6.raw		Control_1
Rap1gap	A2ALS5	A2ALS5	F:\Yifan\20230908_singletubule_raw\230901_st_93_D7.raw	35764.9	Control_1
Rap1gap	A2ALS5	A2ALS5	F:\Yifan\20230908_singletubule_raw\230901_st_93_G1.raw		Control_1
Rap1gap	A2ALS5	A2ALS5	F:\Yifan\20230908_singletubule_raw\230901_st_93_H6.raw		Control_1
Rap1gap	A2ALS5	A2ALS5	F:\Yifan\20230908_singletubule_raw\230901_st_93_A4.raw		Control_1
Rap1gap	A2ALS5	A2ALS5	F:\Yifan\20230908_singletubule_raw\230901_st_93_B8.raw		Control_1
Rap1gap	A2ALS5	A2ALS5	F:\Yifan\20230908_singletubule_raw\230901_st_93_A3.raw		Control_1
Rap1gap	A2ALS5	A2ALS5	F:\Yifan\20230908_singletubule_raw\230901_st_93_A1.raw		Control_1
Rap1gap	A2ALS5	A2ALS5	F:\Yifan\20230908_singletubule_raw\230901_st_93_A2.raw		Control_1
Rap1gap	A2ALS5	A2ALS5	F:\Yifan\20230908_singletubule_raw\230901_st_93_A6.raw		Control_1
Shroom2	A2ALU4	A2ALU4	F:\Yifan\20230908_singletubule_raw\230901_st_93_E8.raw		Control_1
Shroom2	A2ALU4	A2ALU4	F:\Yifan\20230908_singletubule_raw\230901_st_93_G10.raw	10519.6	Control_1
Shroom2	A2ALU4	A2ALU4	F:\Yifan\20230908_singletubule_raw\230901_st_93_G11.raw	3992.32	Control_1
Shroom2	A2ALU4	A2ALU4	F:\Yifan\20230908_singletubule_raw\230901_st_93_H10.raw	5211.23	Control_1
Shroom2	A2ALU4	A2ALU4	F:\Yifan\20230908_singletubule_raw\230901_st_93_H12.raw		Control_1
Shroom2	A2ALU4	A2ALU4	F:\Yifan\20230908_singletubule_raw\230901_st_93_H3.raw		Control_1
Shroom2	A2ALU4	A2ALU4	F:\Yifan\20230908_singletubule_raw\230901_st_93_B6.raw		Control_1
Shroom2	A2ALU4	A2ALU4	F:\Yifan\20230908_singletubule_raw\230901_st_93_H11.raw		Control_1
Shroom2	A2ALU4	A2ALU4	F:\Yifan\20230908_singletubule_raw\230901_st_93_E6.raw		Control_1
Shroom2	A2ALU4	A2ALU4	F:\Yifan\20230908_singletubule_raw\230901_st_93_E7.raw		Control_1
Shroom2	A2ALU4	A2ALU4	F:\Yifan\20230908_singletubule_raw\230901_st_93_G9.raw		Control_1
Shroom2	A2ALU4	A2ALU4	F:\Yifan\20230908_singletubule_raw\230901_st_93_F10.raw	3847.27	Control_1
Shroom2	A2ALU4	A2ALU4	F:\Yifan\20230908_singletubule_raw\230901_st_93_E9.raw	6220.87	Control_1
Shroom2	A2ALU4	A2ALU4	F:\Yifan\20230908_singletubule_raw\230901_st_93_D10.raw	6281.52	Control_1
Shroom2	A2ALU4	A2ALU4	F:\Yifan\20230908_singletubule_raw\230901_st_93_F9.raw	4799.79	Control_1
Shroom2	A2ALU4	A2ALU4	F:\Yifan\20230908_singletubule_raw\230901_st_93_G7.raw		Control_1
Shroom2	A2ALU4	A2ALU4	F:\Yifan\20230908_singletubule_raw\230901_st_93_A9.raw		Control_1
Shroom2	A2ALU4	A2ALU4	F:\Yifan\20230908_singletubule_raw\230901_st_93_E3.raw		Control_1
Shroom2	A2ALU4	A2ALU4	F:\Yifan\20230908_singletubule_raw\230901_st_93_C7.raw	2793.42	Control_1
Shroom2	A2ALU4	A2ALU4	F:\Yifan\20230908_singletubule_raw\230901_st_93_G4.raw		Control_1
Shroom2	A2ALU4	A2ALU4	F:\Yifan\20230908_singletubule_raw\230901_st_93_D3.raw		Control_1
Shroom2	A2ALU4	A2ALU4	F:\Yifan\20230908_singletubule_raw\230901_st_93_F2.raw	4686.68	Control_1
Shroom2	A2ALU4	A2ALU4	F:\Yifan\20230908_singletubule_raw\230901_st_93_G8.raw		Control_1
Shroom2	A2ALU4	A2ALU4	F:\Yifan\20230908_singletubule_raw\230901_st_93_H4.raw	10182.3	Control_1
Shroom2	A2ALU4	A2ALU4	F:\Yifan\20230908_singletubule_raw\230901_st_93_D6.raw		Control_1
Shroom2	A2ALU4	A2ALU4	F:\Yifan\20230908_singletubule_raw\230901_st_93_D4.raw		Control_1
Shroom2	A2ALU4	A2ALU4	F:\Yifan\20230908_singletubule_raw\230901_st_93_F12.raw		Control_1
Shroom2	A2ALU4	A2ALU4	F:\Yifan\20230908_singletubule_raw\230901_st_93_C9.raw		Control_1
Shroom2	A2ALU4	A2ALU4	F:\Yifan\20230908_singletubule_raw\230901_st_93_G12.raw	8308.17	Control_1
Shroom2	A2ALU4	A2ALU4	F:\Yifan\20230908_singletubule_raw\230901_st_93_B10.raw		Control_1
Shroom2	A2ALU4	A2ALU4	F:\Yifan\20230908_singletubule_raw\230901_st_93_B11.raw	13293	Control_1
Shroom2	A2ALU4	A2ALU4	F:\Yifan\20230908_singletubule_raw\230901_st_93_E11.raw		Control_1
Shroom2	A2ALU4	A2ALU4	F:\Yifan\20230908_singletubule_raw\230901_st_93_B12.raw	10716.5	Control_1
Shroom2	A2ALU4	A2ALU4	F:\Yifan\20230908_singletubule_raw\230901_st_93_F3.raw	7686.25	Control_1
Shroom2	A2ALU4	A2ALU4	F:\Yifan\20230908_singletubule_raw\230901_st_93_B4.raw		Control_1
Shroom2	A2ALU4	A2ALU4	F:\Yifan\20230908_singletubule_raw\230901_st_93_C11.raw		Control_1
Shroom2	A2ALU4	A2ALU4	F:\Yifan\20230908_singletubule_raw\230901_st_93_B2.raw		Control_1
Shroom2	A2ALU4	A2ALU4	F:\Yifan\20230908_singletubule_raw\230901_st_93_H9.raw		Control_1
Shroom2	A2ALU4	A2ALU4	F:\Yifan\20230908_singletubule_raw\230901_st_93_F1.raw	7188.58	Control_1
Shroom2	A2ALU4	A2ALU4	F:\Yifan\20230908_singletubule_raw\230901_st_93_C12.raw	4779.81	Control_1
Shroom2	A2ALU4	A2ALU4	F:\Yifan\20230908_singletubule_raw\230901_st_93_D2.raw	9037.77	Control_1
Shroom2	A2ALU4	A2ALU4	F:\Yifan\20230908_singletubule_raw\230901_st_93_H2.raw	3673.74	Control_1
Shroom2	A2ALU4	A2ALU4	F:\Yifan\20230908_singletubule_raw\230901_st_93_A11.raw		Control_1
Shroom2	A2ALU4	A2ALU4	F:\Yifan\20230908_singletubule_raw\230901_st_93_D1.raw		Control_1
Shroom2	A2ALU4	A2ALU4	F:\Yifan\20230908_singletubule_raw\230901_st_93_F7.raw		Control_1
Shroom2	A2ALU4	A2ALU4	F:\Yifan\20230908_singletubule_raw\230901_st_93_E4.raw		Control_1
Shroom2	A2ALU4	A2ALU4	F:\Yifan\20230908_singletubule_raw\230901_st_93_F6.raw		Control_1
Shroom2	A2ALU4	A2ALU4	F:\Yifan\20230908_singletubule_raw\230901_st_93_G2.raw	7787.86	Control_1
Shroom2	A2ALU4	A2ALU4	F:\Yifan\20230908_singletubule_raw\230901_st_93_C10.raw	10551.3	Control_1
Shroom2	A2ALU4	A2ALU4	F:\Yifan\20230908_singletubule_raw\230901_st_93_E12.raw		Control_1
Shroom2	A2ALU4	A2ALU4	F:\Yifan\20230908_singletubule_raw\230901_st_93_D12.raw		Control_1
Shroom2	A2ALU4	A2ALU4	F:\Yifan\20230908_singletubule_raw\230901_st_93_H1.raw		Control_1
Shroom2	A2ALU4	A2ALU4	F:\Yifan\20230908_singletubule_raw\230901_st_93_C4.raw		Control_1
Shroom2	A2ALU4	A2ALU4	F:\Yifan\20230908_singletubule_raw\230901_st_93_A10.raw		Control_1
Shroom2	A2ALU4	A2ALU4	F:\Yifan\20230908_singletubule_raw\230901_st_93_B9.raw		Control_1
Shroom2	A2ALU4	A2ALU4	F:\Yifan\20230908_singletubule_raw\230901_st_93_D8.raw	20605.2	Control_1
Shroom2	A2ALU4	A2ALU4	F:\Yifan\20230908_singletubule_raw\230901_st_93_B1.raw		Control_1
Shroom2	A2ALU4	A2ALU4	F:\Yifan\20230908_singletubule_raw\230901_st_93_A12.raw	7109.09	Control_1
Shroom2	A2ALU4	A2ALU4	F:\Yifan\20230908_singletubule_raw\230901_st_93_C1.raw		Control_1
Shroom2	A2ALU4	A2ALU4	F:\Yifan\20230908_singletubule_raw\230901_st_93_E10.raw	8799.86	Control_1
Shroom2	A2ALU4	A2ALU4	F:\Yifan\20230908_singletubule_raw\230901_st_93_E2.raw	13871.5	Control_1
Shroom2	A2ALU4	A2ALU4	F:\Yifan\20230908_singletubule_raw\230901_st_93_H7.raw		Control_1
Shroom2	A2ALU4	A2ALU4	F:\Yifan\20230908_singletubule_raw\230901_st_93_F4.raw		Control_1
Shroom2	A2ALU4	A2ALU4	F:\Yifan\20230908_singletubule_raw\230901_st_93_H8.raw		Control_1
Shroom2	A2ALU4	A2ALU4	F:\Yifan\20230908_singletubule_raw\230901_st_93_D11.raw		Control_1
Shroom2	A2ALU4	A2ALU4	F:\Yifan\20230908_singletubule_raw\230901_st_93_C3.raw		Control_1
Shroom2	A2ALU4	A2ALU4	F:\Yifan\20230908_singletubule_raw\230901_st_93_D9.raw		Control_1
Shroom2	A2ALU4	A2ALU4	F:\Yifan\20230908_singletubule_raw\230901_st_93_F11.raw		Control_1
Shroom2	A2ALU4	A2ALU4	F:\Yifan\20230908_singletubule_raw\230901_st_93_B7.raw	7697.83	Control_1
Shroom2	A2ALU4	A2ALU4	F:\Yifan\20230908_singletubule_raw\230901_st_93_F8.raw		Control_1
Shroom2	A2ALU4	A2ALU4	F:\Yifan\20230908_singletubule_raw\230901_st_93_C8.raw		Control_1
Shroom2	A2ALU4	A2ALU4	F:\Yifan\20230908_singletubule_raw\230901_st_93_A8.raw		Control_1
Shroom2	A2ALU4	A2ALU4	F:\Yifan\20230908_singletubule_raw\230901_st_93_G3.raw	9733.75	Control_1
Shroom2	A2ALU4	A2ALU4	F:\Yifan\20230908_singletubule_raw\230901_st_93_E1.raw		Control_1
Shroom2	A2ALU4	A2ALU4	F:\Yifan\20230908_singletubule_raw\230901_st_93_C2.raw	14167	Control_1
Shroom2	A2ALU4	A2ALU4	F:\Yifan\20230908_singletubule_raw\230901_st_93_B3.raw		Control_1
Shroom2	A2ALU4	A2ALU4	F:\Yifan\20230908_singletubule_raw\230901_st_93_A7.raw		Control_1
Shroom2	A2ALU4	A2ALU4	F:\Yifan\20230908_singletubule_raw\230901_st_93_G6.raw		Control_1
Shroom2	A2ALU4	A2ALU4	F:\Yifan\20230908_singletubule_raw\230901_st_93_D7.raw		Control_1
Shroom2	A2ALU4	A2ALU4	F:\Yifan\20230908_singletubule_raw\230901_st_93_G1.raw		Control_1
Shroom2	A2ALU4	A2ALU4	F:\Yifan\20230908_singletubule_raw\230901_st_93_H6.raw		Control_1
Shroom2	A2ALU4	A2ALU4	F:\Yifan\20230908_singletubule_raw\230901_st_93_A4.raw		Control_1
Shroom2	A2ALU4	A2ALU4	F:\Yifan\20230908_singletubule_raw\230901_st_93_B8.raw		Control_1
Shroom2	A2ALU4	A2ALU4	F:\Yifan\20230908_singletubule_raw\230901_st_93_A3.raw		Control_1
Shroom2	A2ALU4	A2ALU4	F:\Yifan\20230908_singletubule_raw\230901_st_93_A1.raw		Control_1
Shroom2	A2ALU4	A2ALU4	F:\Yifan\20230908_singletubule_raw\230901_st_93_A2.raw		Control_1
Shroom2	A2ALU4	A2ALU4	F:\Yifan\20230908_singletubule_raw\230901_st_93_A6.raw		Control_1
Ubr4	A2AN08	A2AN08	F:\Yifan\20230908_singletubule_raw\230901_st_93_E8.raw	38595.8	Control_1
Ubr4	A2AN08	A2AN08	F:\Yifan\20230908_singletubule_raw\230901_st_93_G10.raw	33825.5	Control_1
Ubr4	A2AN08	A2AN08	F:\Yifan\20230908_singletubule_raw\230901_st_93_G11.raw	41907.2	Control_1
Ubr4	A2AN08	A2AN08	F:\Yifan\20230908_singletubule_raw\230901_st_93_H10.raw	31879.5	Control_1
Ubr4	A2AN08	A2AN08	F:\Yifan\20230908_singletubule_raw\230901_st_93_H12.raw	31570.5	Control_1
Ubr4	A2AN08	A2AN08	F:\Yifan\20230908_singletubule_raw\230901_st_93_H3.raw	27643.1	Control_1
Ubr4	A2AN08	A2AN08	F:\Yifan\20230908_singletubule_raw\230901_st_93_B6.raw	31352.6	Control_1
Ubr4	A2AN08	A2AN08	F:\Yifan\20230908_singletubule_raw\230901_st_93_H11.raw	28703.9	Control_1
Ubr4	A2AN08	A2AN08	F:\Yifan\20230908_singletubule_raw\230901_st_93_E6.raw	25391.3	Control_1
Ubr4	A2AN08	A2AN08	F:\Yifan\20230908_singletubule_raw\230901_st_93_E7.raw	42486.3	Control_1
Ubr4	A2AN08	A2AN08	F:\Yifan\20230908_singletubule_raw\230901_st_93_G9.raw	32702.3	Control_1
Ubr4	A2AN08	A2AN08	F:\Yifan\20230908_singletubule_raw\230901_st_93_F10.raw	29461.6	Control_1
Ubr4	A2AN08	A2AN08	F:\Yifan\20230908_singletubule_raw\230901_st_93_E9.raw	34726	Control_1
Ubr4	A2AN08	A2AN08	F:\Yifan\20230908_singletubule_raw\230901_st_93_D10.raw	30308.5	Control_1
Ubr4	A2AN08	A2AN08	F:\Yifan\20230908_singletubule_raw\230901_st_93_F9.raw	31539.7	Control_1
Ubr4	A2AN08	A2AN08	F:\Yifan\20230908_singletubule_raw\230901_st_93_G7.raw	30429.1	Control_1
Ubr4	A2AN08	A2AN08	F:\Yifan\20230908_singletubule_raw\230901_st_93_A9.raw	36942.4	Control_1
Ubr4	A2AN08	A2AN08	F:\Yifan\20230908_singletubule_raw\230901_st_93_E3.raw	28811.2	Control_1
Ubr4	A2AN08	A2AN08	F:\Yifan\20230908_singletubule_raw\230901_st_93_C7.raw	30356.8	Control_1
Ubr4	A2AN08	A2AN08	F:\Yifan\20230908_singletubule_raw\230901_st_93_G4.raw	29741	Control_1
Ubr4	A2AN08	A2AN08	F:\Yifan\20230908_singletubule_raw\230901_st_93_D3.raw	24705.5	Control_1
Ubr4	A2AN08	A2AN08	F:\Yifan\20230908_singletubule_raw\230901_st_93_F2.raw	34254.7	Control_1
Ubr4	A2AN08	A2AN08	F:\Yifan\20230908_singletubule_raw\230901_st_93_G8.raw	33975.6	Control_1
Ubr4	A2AN08	A2AN08	F:\Yifan\20230908_singletubule_raw\230901_st_93_H4.raw	30841.6	Control_1
Ubr4	A2AN08	A2AN08	F:\Yifan\20230908_singletubule_raw\230901_st_93_D6.raw	26513	Control_1
Ubr4	A2AN08	A2AN08	F:\Yifan\20230908_singletubule_raw\230901_st_93_D4.raw	31815.5	Control_1
Ubr4	A2AN08	A2AN08	F:\Yifan\20230908_singletubule_raw\230901_st_93_F12.raw	34388.5	Control_1
Ubr4	A2AN08	A2AN08	F:\Yifan\20230908_singletubule_raw\230901_st_93_C9.raw	38280.9	Control_1
Ubr4	A2AN08	A2AN08	F:\Yifan\20230908_singletubule_raw\230901_st_93_G12.raw	30586.2	Control_1
Ubr4	A2AN08	A2AN08	F:\Yifan\20230908_singletubule_raw\230901_st_93_B10.raw	27180.3	Control_1
Ubr4	A2AN08	A2AN08	F:\Yifan\20230908_singletubule_raw\230901_st_93_B11.raw	24235.1	Control_1
Ubr4	A2AN08	A2AN08	F:\Yifan\20230908_singletubule_raw\230901_st_93_E11.raw	24997	Control_1
Ubr4	A2AN08	A2AN08	F:\Yifan\20230908_singletubule_raw\230901_st_93_B12.raw	34278.7	Control_1
Ubr4	A2AN08	A2AN08	F:\Yifan\20230908_singletubule_raw\230901_st_93_F3.raw	30566.4	Control_1
Ubr4	A2AN08	A2AN08	F:\Yifan\20230908_singletubule_raw\230901_st_93_B4.raw	23477	Control_1
Ubr4	A2AN08	A2AN08	F:\Yifan\20230908_singletubule_raw\230901_st_93_C11.raw	23422.9	Control_1
Ubr4	A2AN08	A2AN08	F:\Yifan\20230908_singletubule_raw\230901_st_93_B2.raw	30004.2	Control_1
Ubr4	A2AN08	A2AN08	F:\Yifan\20230908_singletubule_raw\230901_st_93_H9.raw	31072.3	Control_1
Ubr4	A2AN08	A2AN08	F:\Yifan\20230908_singletubule_raw\230901_st_93_F1.raw	31435.3	Control_1
Ubr4	A2AN08	A2AN08	F:\Yifan\20230908_singletubule_raw\230901_st_93_C12.raw	26312.4	Control_1
Ubr4	A2AN08	A2AN08	F:\Yifan\20230908_singletubule_raw\230901_st_93_D2.raw	22028.9	Control_1
Ubr4	A2AN08	A2AN08	F:\Yifan\20230908_singletubule_raw\230901_st_93_H2.raw	21778.1	Control_1
Ubr4	A2AN08	A2AN08	F:\Yifan\20230908_singletubule_raw\230901_st_93_A11.raw	29584	Control_1
Ubr4	A2AN08	A2AN08	F:\Yifan\20230908_singletubule_raw\230901_st_93_D1.raw	25659.9	Control_1
Ubr4	A2AN08	A2AN08	F:\Yifan\20230908_singletubule_raw\230901_st_93_F7.raw	26329.5	Control_1
Ubr4	A2AN08	A2AN08	F:\Yifan\20230908_singletubule_raw\230901_st_93_E4.raw	24539.8	Control_1
Ubr4	A2AN08	A2AN08	F:\Yifan\20230908_singletubule_raw\230901_st_93_F6.raw	26803.7	Control_1
Ubr4	A2AN08	A2AN08	F:\Yifan\20230908_singletubule_raw\230901_st_93_G2.raw	30388.9	Control_1
Ubr4	A2AN08	A2AN08	F:\Yifan\20230908_singletubule_raw\230901_st_93_C10.raw	29387.1	Control_1
Ubr4	A2AN08	A2AN08	F:\Yifan\20230908_singletubule_raw\230901_st_93_E12.raw	39842.4	Control_1
Ubr4	A2AN08	A2AN08	F:\Yifan\20230908_singletubule_raw\230901_st_93_D12.raw	26567.6	Control_1
Ubr4	A2AN08	A2AN08	F:\Yifan\20230908_singletubule_raw\230901_st_93_H1.raw	28113.9	Control_1
Ubr4	A2AN08	A2AN08	F:\Yifan\20230908_singletubule_raw\230901_st_93_C4.raw	25519.7	Control_1
Ubr4	A2AN08	A2AN08	F:\Yifan\20230908_singletubule_raw\230901_st_93_A10.raw	20274.1	Control_1
Ubr4	A2AN08	A2AN08	F:\Yifan\20230908_singletubule_raw\230901_st_93_B9.raw	16714.2	Control_1
Ubr4	A2AN08	A2AN08	F:\Yifan\20230908_singletubule_raw\230901_st_93_D8.raw	20137.6	Control_1
Ubr4	A2AN08	A2AN08	F:\Yifan\20230908_singletubule_raw\230901_st_93_B1.raw	32264.3	Control_1
Ubr4	A2AN08	A2AN08	F:\Yifan\20230908_singletubule_raw\230901_st_93_A12.raw	20104.2	Control_1
Ubr4	A2AN08	A2AN08	F:\Yifan\20230908_singletubule_raw\230901_st_93_C1.raw	30219.2	Control_1
Ubr4	A2AN08	A2AN08	F:\Yifan\20230908_singletubule_raw\230901_st_93_E10.raw	22301.7	Control_1
Ubr4	A2AN08	A2AN08	F:\Yifan\20230908_singletubule_raw\230901_st_93_E2.raw	29625.1	Control_1
Ubr4	A2AN08	A2AN08	F:\Yifan\20230908_singletubule_raw\230901_st_93_H7.raw	45668.1	Control_1
Ubr4	A2AN08	A2AN08	F:\Yifan\20230908_singletubule_raw\230901_st_93_F4.raw	41771.8	Control_1
Ubr4	A2AN08	A2AN08	F:\Yifan\20230908_singletubule_raw\230901_st_93_H8.raw	25853.4	Control_1
Ubr4	A2AN08	A2AN08	F:\Yifan\20230908_singletubule_raw\230901_st_93_D11.raw	31550.8	Control_1
Ubr4	A2AN08	A2AN08	F:\Yifan\20230908_singletubule_raw\230901_st_93_C3.raw	25485.1	Control_1
Ubr4	A2AN08	A2AN08	F:\Yifan\20230908_singletubule_raw\230901_st_93_D9.raw	25608	Control_1
Ubr4	A2AN08	A2AN08	F:\Yifan\20230908_singletubule_raw\230901_st_93_F11.raw	26429	Control_1
Ubr4	A2AN08	A2AN08	F:\Yifan\20230908_singletubule_raw\230901_st_93_B7.raw	30508.3	Control_1
Ubr4	A2AN08	A2AN08	F:\Yifan\20230908_singletubule_raw\230901_st_93_F8.raw	14627.1	Control_1
Ubr4	A2AN08	A2AN08	F:\Yifan\20230908_singletubule_raw\230901_st_93_C8.raw	26915.6	Control_1
Ubr4	A2AN08	A2AN08	F:\Yifan\20230908_singletubule_raw\230901_st_93_A8.raw	15422.9	Control_1
Ubr4	A2AN08	A2AN08	F:\Yifan\20230908_singletubule_raw\230901_st_93_G3.raw	27823.2	Control_1
Ubr4	A2AN08	A2AN08	F:\Yifan\20230908_singletubule_raw\230901_st_93_E1.raw	11573.8	Control_1
Ubr4	A2AN08	A2AN08	F:\Yifan\20230908_singletubule_raw\230901_st_93_C2.raw	59879	Control_1
Ubr4	A2AN08	A2AN08	F:\Yifan\20230908_singletubule_raw\230901_st_93_B3.raw	23867.8	Control_1
Ubr4	A2AN08	A2AN08	F:\Yifan\20230908_singletubule_raw\230901_st_93_A7.raw	15705.8	Control_1
Ubr4	A2AN08	A2AN08	F:\Yifan\20230908_singletubule_raw\230901_st_93_G6.raw		Control_1
Ubr4	A2AN08	A2AN08	F:\Yifan\20230908_singletubule_raw\230901_st_93_D7.raw	32425.3	Control_1
Ubr4	A2AN08	A2AN08	F:\Yifan\20230908_singletubule_raw\230901_st_93_G1.raw	18181.4	Control_1
Ubr4	A2AN08	A2AN08	F:\Yifan\20230908_singletubule_raw\230901_st_93_H6.raw		Control_1
Ubr4	A2AN08	A2AN08	F:\Yifan\20230908_singletubule_raw\230901_st_93_A4.raw		Control_1
Ubr4	A2AN08	A2AN08	F:\Yifan\20230908_singletubule_raw\230901_st_93_B8.raw		Control_1
Ubr4	A2AN08	A2AN08	F:\Yifan\20230908_singletubule_raw\230901_st_93_A3.raw		Control_1
Ubr4	A2AN08	A2AN08	F:\Yifan\20230908_singletubule_raw\230901_st_93_A1.raw		Control_1
Ubr4	A2AN08	A2AN08	F:\Yifan\20230908_singletubule_raw\230901_st_93_A2.raw		Control_1
Ubr4	A2AN08	A2AN08	F:\Yifan\20230908_singletubule_raw\230901_st_93_A6.raw		Control_1
Klhdc7a	A2APT9	A2APT9	F:\Yifan\20230908_singletubule_raw\230901_st_93_E8.raw	70901.9	Control_1
Klhdc7a	A2APT9	A2APT9	F:\Yifan\20230908_singletubule_raw\230901_st_93_G10.raw	67746.8	Control_1
Klhdc7a	A2APT9	A2APT9	F:\Yifan\20230908_singletubule_raw\230901_st_93_G11.raw	77924.9	Control_1
Klhdc7a	A2APT9	A2APT9	F:\Yifan\20230908_singletubule_raw\230901_st_93_H10.raw	94745.9	Control_1
Klhdc7a	A2APT9	A2APT9	F:\Yifan\20230908_singletubule_raw\230901_st_93_H12.raw	59224.6	Control_1
Klhdc7a	A2APT9	A2APT9	F:\Yifan\20230908_singletubule_raw\230901_st_93_H3.raw	64011.3	Control_1
Klhdc7a	A2APT9	A2APT9	F:\Yifan\20230908_singletubule_raw\230901_st_93_B6.raw	50825.1	Control_1
Klhdc7a	A2APT9	A2APT9	F:\Yifan\20230908_singletubule_raw\230901_st_93_H11.raw	33800.2	Control_1
Klhdc7a	A2APT9	A2APT9	F:\Yifan\20230908_singletubule_raw\230901_st_93_E6.raw	46355.1	Control_1
Klhdc7a	A2APT9	A2APT9	F:\Yifan\20230908_singletubule_raw\230901_st_93_E7.raw	61905.7	Control_1
Klhdc7a	A2APT9	A2APT9	F:\Yifan\20230908_singletubule_raw\230901_st_93_G9.raw	53683.8	Control_1
Klhdc7a	A2APT9	A2APT9	F:\Yifan\20230908_singletubule_raw\230901_st_93_F10.raw	99857.9	Control_1
Klhdc7a	A2APT9	A2APT9	F:\Yifan\20230908_singletubule_raw\230901_st_93_E9.raw	63690	Control_1
Klhdc7a	A2APT9	A2APT9	F:\Yifan\20230908_singletubule_raw\230901_st_93_D10.raw	96008.2	Control_1
Klhdc7a	A2APT9	A2APT9	F:\Yifan\20230908_singletubule_raw\230901_st_93_F9.raw	49486.9	Control_1
Klhdc7a	A2APT9	A2APT9	F:\Yifan\20230908_singletubule_raw\230901_st_93_G7.raw	74859.4	Control_1
Klhdc7a	A2APT9	A2APT9	F:\Yifan\20230908_singletubule_raw\230901_st_93_A9.raw	105598	Control_1
Klhdc7a	A2APT9	A2APT9	F:\Yifan\20230908_singletubule_raw\230901_st_93_E3.raw	67675.3	Control_1
Klhdc7a	A2APT9	A2APT9	F:\Yifan\20230908_singletubule_raw\230901_st_93_C7.raw	40466.1	Control_1
Klhdc7a	A2APT9	A2APT9	F:\Yifan\20230908_singletubule_raw\230901_st_93_G4.raw	59490.6	Control_1
Klhdc7a	A2APT9	A2APT9	F:\Yifan\20230908_singletubule_raw\230901_st_93_D3.raw	67789.2	Control_1
Klhdc7a	A2APT9	A2APT9	F:\Yifan\20230908_singletubule_raw\230901_st_93_F2.raw	33742.4	Control_1
Klhdc7a	A2APT9	A2APT9	F:\Yifan\20230908_singletubule_raw\230901_st_93_G8.raw	48159.9	Control_1
Klhdc7a	A2APT9	A2APT9	F:\Yifan\20230908_singletubule_raw\230901_st_93_H4.raw	83817.2	Control_1
Klhdc7a	A2APT9	A2APT9	F:\Yifan\20230908_singletubule_raw\230901_st_93_D6.raw	89520	Control_1
Klhdc7a	A2APT9	A2APT9	F:\Yifan\20230908_singletubule_raw\230901_st_93_D4.raw	34780.1	Control_1
Klhdc7a	A2APT9	A2APT9	F:\Yifan\20230908_singletubule_raw\230901_st_93_F12.raw	45242.9	Control_1
Klhdc7a	A2APT9	A2APT9	F:\Yifan\20230908_singletubule_raw\230901_st_93_C9.raw	77417.8	Control_1
Klhdc7a	A2APT9	A2APT9	F:\Yifan\20230908_singletubule_raw\230901_st_93_G12.raw	48905.4	Control_1
Klhdc7a	A2APT9	A2APT9	F:\Yifan\20230908_singletubule_raw\230901_st_93_B10.raw	79854.8	Control_1
Klhdc7a	A2APT9	A2APT9	F:\Yifan\20230908_singletubule_raw\230901_st_93_B11.raw	61670.6	Control_1
Klhdc7a	A2APT9	A2APT9	F:\Yifan\20230908_singletubule_raw\230901_st_93_E11.raw	48051.3	Control_1
Klhdc7a	A2APT9	A2APT9	F:\Yifan\20230908_singletubule_raw\230901_st_93_B12.raw	62352	Control_1
Klhdc7a	A2APT9	A2APT9	F:\Yifan\20230908_singletubule_raw\230901_st_93_F3.raw	35912.3	Control_1
Klhdc7a	A2APT9	A2APT9	F:\Yifan\20230908_singletubule_raw\230901_st_93_B4.raw	49202	Control_1
Klhdc7a	A2APT9	A2APT9	F:\Yifan\20230908_singletubule_raw\230901_st_93_C11.raw	76312.4	Control_1
Klhdc7a	A2APT9	A2APT9	F:\Yifan\20230908_singletubule_raw\230901_st_93_B2.raw	69519.8	Control_1
Klhdc7a	A2APT9	A2APT9	F:\Yifan\20230908_singletubule_raw\230901_st_93_H9.raw	93201.9	Control_1
Klhdc7a	A2APT9	A2APT9	F:\Yifan\20230908_singletubule_raw\230901_st_93_F1.raw	61729.1	Control_1
Klhdc7a	A2APT9	A2APT9	F:\Yifan\20230908_singletubule_raw\230901_st_93_C12.raw	38275.8	Control_1
Klhdc7a	A2APT9	A2APT9	F:\Yifan\20230908_singletubule_raw\230901_st_93_D2.raw	84873.8	Control_1
Klhdc7a	A2APT9	A2APT9	F:\Yifan\20230908_singletubule_raw\230901_st_93_H2.raw	81792.6	Control_1
Klhdc7a	A2APT9	A2APT9	F:\Yifan\20230908_singletubule_raw\230901_st_93_A11.raw	27344.1	Control_1
Klhdc7a	A2APT9	A2APT9	F:\Yifan\20230908_singletubule_raw\230901_st_93_D1.raw	52614.4	Control_1
Klhdc7a	A2APT9	A2APT9	F:\Yifan\20230908_singletubule_raw\230901_st_93_F7.raw	63420.9	Control_1
Klhdc7a	A2APT9	A2APT9	F:\Yifan\20230908_singletubule_raw\230901_st_93_E4.raw	23195.9	Control_1
Klhdc7a	A2APT9	A2APT9	F:\Yifan\20230908_singletubule_raw\230901_st_93_F6.raw	78824.9	Control_1
Klhdc7a	A2APT9	A2APT9	F:\Yifan\20230908_singletubule_raw\230901_st_93_G2.raw	80707.8	Control_1
Klhdc7a	A2APT9	A2APT9	F:\Yifan\20230908_singletubule_raw\230901_st_93_C10.raw	33505.8	Control_1
Klhdc7a	A2APT9	A2APT9	F:\Yifan\20230908_singletubule_raw\230901_st_93_E12.raw	54556.3	Control_1
Klhdc7a	A2APT9	A2APT9	F:\Yifan\20230908_singletubule_raw\230901_st_93_D12.raw	45940.9	Control_1
Klhdc7a	A2APT9	A2APT9	F:\Yifan\20230908_singletubule_raw\230901_st_93_H1.raw	55061.2	Control_1
Klhdc7a	A2APT9	A2APT9	F:\Yifan\20230908_singletubule_raw\230901_st_93_C4.raw	80503.2	Control_1
Klhdc7a	A2APT9	A2APT9	F:\Yifan\20230908_singletubule_raw\230901_st_93_A10.raw	72312.4	Control_1
Klhdc7a	A2APT9	A2APT9	F:\Yifan\20230908_singletubule_raw\230901_st_93_B9.raw	24468.2	Control_1
Klhdc7a	A2APT9	A2APT9	F:\Yifan\20230908_singletubule_raw\230901_st_93_D8.raw	61585.7	Control_1
Klhdc7a	A2APT9	A2APT9	F:\Yifan\20230908_singletubule_raw\230901_st_93_B1.raw	36996.5	Control_1
Klhdc7a	A2APT9	A2APT9	F:\Yifan\20230908_singletubule_raw\230901_st_93_A12.raw	31481.2	Control_1
Klhdc7a	A2APT9	A2APT9	F:\Yifan\20230908_singletubule_raw\230901_st_93_C1.raw	74968.9	Control_1
Klhdc7a	A2APT9	A2APT9	F:\Yifan\20230908_singletubule_raw\230901_st_93_E10.raw	64535.6	Control_1
Klhdc7a	A2APT9	A2APT9	F:\Yifan\20230908_singletubule_raw\230901_st_93_E2.raw	71387.5	Control_1
Klhdc7a	A2APT9	A2APT9	F:\Yifan\20230908_singletubule_raw\230901_st_93_H7.raw	25722.5	Control_1
Klhdc7a	A2APT9	A2APT9	F:\Yifan\20230908_singletubule_raw\230901_st_93_F4.raw	60451.6	Control_1
Klhdc7a	A2APT9	A2APT9	F:\Yifan\20230908_singletubule_raw\230901_st_93_H8.raw	59865.3	Control_1
Klhdc7a	A2APT9	A2APT9	F:\Yifan\20230908_singletubule_raw\230901_st_93_D11.raw	69278.4	Control_1
Klhdc7a	A2APT9	A2APT9	F:\Yifan\20230908_singletubule_raw\230901_st_93_C3.raw	30357.8	Control_1
Klhdc7a	A2APT9	A2APT9	F:\Yifan\20230908_singletubule_raw\230901_st_93_D9.raw	22655.9	Control_1
Klhdc7a	A2APT9	A2APT9	F:\Yifan\20230908_singletubule_raw\230901_st_93_F11.raw	31256	Control_1
Klhdc7a	A2APT9	A2APT9	F:\Yifan\20230908_singletubule_raw\230901_st_93_B7.raw	73254.7	Control_1
Klhdc7a	A2APT9	A2APT9	F:\Yifan\20230908_singletubule_raw\230901_st_93_F8.raw		Control_1
Klhdc7a	A2APT9	A2APT9	F:\Yifan\20230908_singletubule_raw\230901_st_93_C8.raw	62615.4	Control_1
Klhdc7a	A2APT9	A2APT9	F:\Yifan\20230908_singletubule_raw\230901_st_93_A8.raw	78108.7	Control_1
Klhdc7a	A2APT9	A2APT9	F:\Yifan\20230908_singletubule_raw\230901_st_93_G3.raw	77793.2	Control_1
Klhdc7a	A2APT9	A2APT9	F:\Yifan\20230908_singletubule_raw\230901_st_93_E1.raw	63831.6	Control_1
Klhdc7a	A2APT9	A2APT9	F:\Yifan\20230908_singletubule_raw\230901_st_93_C2.raw	61712.5	Control_1
Klhdc7a	A2APT9	A2APT9	F:\Yifan\20230908_singletubule_raw\230901_st_93_B3.raw		Control_1
Klhdc7a	A2APT9	A2APT9	F:\Yifan\20230908_singletubule_raw\230901_st_93_A7.raw	50800.9	Control_1
Klhdc7a	A2APT9	A2APT9	F:\Yifan\20230908_singletubule_raw\230901_st_93_G6.raw	18467.1	Control_1
Klhdc7a	A2APT9	A2APT9	F:\Yifan\20230908_singletubule_raw\230901_st_93_D7.raw	80349.4	Control_1
Klhdc7a	A2APT9	A2APT9	F:\Yifan\20230908_singletubule_raw\230901_st_93_G1.raw		Control_1
Klhdc7a	A2APT9	A2APT9	F:\Yifan\20230908_singletubule_raw\230901_st_93_H6.raw	38634.3	Control_1
Klhdc7a	A2APT9	A2APT9	F:\Yifan\20230908_singletubule_raw\230901_st_93_A4.raw		Control_1
Klhdc7a	A2APT9	A2APT9	F:\Yifan\20230908_singletubule_raw\230901_st_93_B8.raw		Control_1
Klhdc7a	A2APT9	A2APT9	F:\Yifan\20230908_singletubule_raw\230901_st_93_A3.raw		Control_1
Klhdc7a	A2APT9	A2APT9	F:\Yifan\20230908_singletubule_raw\230901_st_93_A1.raw		Control_1
Klhdc7a	A2APT9	A2APT9	F:\Yifan\20230908_singletubule_raw\230901_st_93_A2.raw		Control_1
Klhdc7a	A2APT9	A2APT9	F:\Yifan\20230908_singletubule_raw\230901_st_93_A6.raw		Control_1
Ndufaf5	A2APY7	A2APY7	F:\Yifan\20230908_singletubule_raw\230901_st_93_E8.raw	6001.39	Control_1
Ndufaf5	A2APY7	A2APY7	F:\Yifan\20230908_singletubule_raw\230901_st_93_G10.raw	5462.96	Control_1
Ndufaf5	A2APY7	A2APY7	F:\Yifan\20230908_singletubule_raw\230901_st_93_G11.raw		Control_1
Ndufaf5	A2APY7	A2APY7	F:\Yifan\20230908_singletubule_raw\230901_st_93_H10.raw		Control_1
Ndufaf5	A2APY7	A2APY7	F:\Yifan\20230908_singletubule_raw\230901_st_93_H12.raw	23492.2	Control_1
Ndufaf5	A2APY7	A2APY7	F:\Yifan\20230908_singletubule_raw\230901_st_93_H3.raw	23846.9	Control_1
Ndufaf5	A2APY7	A2APY7	F:\Yifan\20230908_singletubule_raw\230901_st_93_B6.raw	3778.48	Control_1
Ndufaf5	A2APY7	A2APY7	F:\Yifan\20230908_singletubule_raw\230901_st_93_H11.raw	6161.94	Control_1
Ndufaf5	A2APY7	A2APY7	F:\Yifan\20230908_singletubule_raw\230901_st_93_E6.raw	5991.08	Control_1
Ndufaf5	A2APY7	A2APY7	F:\Yifan\20230908_singletubule_raw\230901_st_93_E7.raw		Control_1
Ndufaf5	A2APY7	A2APY7	F:\Yifan\20230908_singletubule_raw\230901_st_93_G9.raw	6158.98	Control_1
Ndufaf5	A2APY7	A2APY7	F:\Yifan\20230908_singletubule_raw\230901_st_93_F10.raw	14431.9	Control_1
Ndufaf5	A2APY7	A2APY7	F:\Yifan\20230908_singletubule_raw\230901_st_93_E9.raw	33318.1	Control_1
Ndufaf5	A2APY7	A2APY7	F:\Yifan\20230908_singletubule_raw\230901_st_93_D10.raw		Control_1
Ndufaf5	A2APY7	A2APY7	F:\Yifan\20230908_singletubule_raw\230901_st_93_F9.raw	27180.3	Control_1
Ndufaf5	A2APY7	A2APY7	F:\Yifan\20230908_singletubule_raw\230901_st_93_G7.raw		Control_1
Ndufaf5	A2APY7	A2APY7	F:\Yifan\20230908_singletubule_raw\230901_st_93_A9.raw	20133.6	Control_1
Ndufaf5	A2APY7	A2APY7	F:\Yifan\20230908_singletubule_raw\230901_st_93_E3.raw	8569.74	Control_1
Ndufaf5	A2APY7	A2APY7	F:\Yifan\20230908_singletubule_raw\230901_st_93_C7.raw	41944.3	Control_1
Ndufaf5	A2APY7	A2APY7	F:\Yifan\20230908_singletubule_raw\230901_st_93_G4.raw	36806.3	Control_1
Ndufaf5	A2APY7	A2APY7	F:\Yifan\20230908_singletubule_raw\230901_st_93_D3.raw		Control_1
Ndufaf5	A2APY7	A2APY7	F:\Yifan\20230908_singletubule_raw\230901_st_93_F2.raw		Control_1
Ndufaf5	A2APY7	A2APY7	F:\Yifan\20230908_singletubule_raw\230901_st_93_G8.raw	8322.14	Control_1
Ndufaf5	A2APY7	A2APY7	F:\Yifan\20230908_singletubule_raw\230901_st_93_H4.raw	8446.48	Control_1
Ndufaf5	A2APY7	A2APY7	F:\Yifan\20230908_singletubule_raw\230901_st_93_D6.raw		Control_1
Ndufaf5	A2APY7	A2APY7	F:\Yifan\20230908_singletubule_raw\230901_st_93_D4.raw	7136.61	Control_1
Ndufaf5	A2APY7	A2APY7	F:\Yifan\20230908_singletubule_raw\230901_st_93_F12.raw	22606.2	Control_1
Ndufaf5	A2APY7	A2APY7	F:\Yifan\20230908_singletubule_raw\230901_st_93_C9.raw	12253.3	Control_1
Ndufaf5	A2APY7	A2APY7	F:\Yifan\20230908_singletubule_raw\230901_st_93_G12.raw		Control_1
Ndufaf5	A2APY7	A2APY7	F:\Yifan\20230908_singletubule_raw\230901_st_93_B10.raw	19106	Control_1
Ndufaf5	A2APY7	A2APY7	F:\Yifan\20230908_singletubule_raw\230901_st_93_B11.raw	40772.1	Control_1
Ndufaf5	A2APY7	A2APY7	F:\Yifan\20230908_singletubule_raw\230901_st_93_E11.raw	8023.27	Control_1
Ndufaf5	A2APY7	A2APY7	F:\Yifan\20230908_singletubule_raw\230901_st_93_B12.raw	28986.6	Control_1
Ndufaf5	A2APY7	A2APY7	F:\Yifan\20230908_singletubule_raw\230901_st_93_F3.raw	14436.5	Control_1
Ndufaf5	A2APY7	A2APY7	F:\Yifan\20230908_singletubule_raw\230901_st_93_B4.raw		Control_1
Ndufaf5	A2APY7	A2APY7	F:\Yifan\20230908_singletubule_raw\230901_st_93_C11.raw	9864.22	Control_1
Ndufaf5	A2APY7	A2APY7	F:\Yifan\20230908_singletubule_raw\230901_st_93_B2.raw		Control_1
Ndufaf5	A2APY7	A2APY7	F:\Yifan\20230908_singletubule_raw\230901_st_93_H9.raw	18540.9	Control_1
Ndufaf5	A2APY7	A2APY7	F:\Yifan\20230908_singletubule_raw\230901_st_93_F1.raw	28099.1	Control_1
Ndufaf5	A2APY7	A2APY7	F:\Yifan\20230908_singletubule_raw\230901_st_93_C12.raw	28232.5	Control_1
Ndufaf5	A2APY7	A2APY7	F:\Yifan\20230908_singletubule_raw\230901_st_93_D2.raw		Control_1
Ndufaf5	A2APY7	A2APY7	F:\Yifan\20230908_singletubule_raw\230901_st_93_H2.raw		Control_1
Ndufaf5	A2APY7	A2APY7	F:\Yifan\20230908_singletubule_raw\230901_st_93_A11.raw		Control_1
Ndufaf5	A2APY7	A2APY7	F:\Yifan\20230908_singletubule_raw\230901_st_93_D1.raw		Control_1
Ndufaf5	A2APY7	A2APY7	F:\Yifan\20230908_singletubule_raw\230901_st_93_F7.raw	27909.4	Control_1
Ndufaf5	A2APY7	A2APY7	F:\Yifan\20230908_singletubule_raw\230901_st_93_E4.raw	27761.8	Control_1
Ndufaf5	A2APY7	A2APY7	F:\Yifan\20230908_singletubule_raw\230901_st_93_F6.raw	11855.9	Control_1
Ndufaf5	A2APY7	A2APY7	F:\Yifan\20230908_singletubule_raw\230901_st_93_G2.raw	23198.8	Control_1
Ndufaf5	A2APY7	A2APY7	F:\Yifan\20230908_singletubule_raw\230901_st_93_C10.raw	12442.4	Control_1
Ndufaf5	A2APY7	A2APY7	F:\Yifan\20230908_singletubule_raw\230901_st_93_E12.raw	37017.4	Control_1
Ndufaf5	A2APY7	A2APY7	F:\Yifan\20230908_singletubule_raw\230901_st_93_D12.raw	27234.1	Control_1
Ndufaf5	A2APY7	A2APY7	F:\Yifan\20230908_singletubule_raw\230901_st_93_H1.raw		Control_1
Ndufaf5	A2APY7	A2APY7	F:\Yifan\20230908_singletubule_raw\230901_st_93_C4.raw		Control_1
Ndufaf5	A2APY7	A2APY7	F:\Yifan\20230908_singletubule_raw\230901_st_93_A10.raw	19517.3	Control_1
Ndufaf5	A2APY7	A2APY7	F:\Yifan\20230908_singletubule_raw\230901_st_93_B9.raw		Control_1
Ndufaf5	A2APY7	A2APY7	F:\Yifan\20230908_singletubule_raw\230901_st_93_D8.raw		Control_1
Ndufaf5	A2APY7	A2APY7	F:\Yifan\20230908_singletubule_raw\230901_st_93_B1.raw	26259.3	Control_1
Ndufaf5	A2APY7	A2APY7	F:\Yifan\20230908_singletubule_raw\230901_st_93_A12.raw		Control_1
Ndufaf5	A2APY7	A2APY7	F:\Yifan\20230908_singletubule_raw\230901_st_93_C1.raw		Control_1
Ndufaf5	A2APY7	A2APY7	F:\Yifan\20230908_singletubule_raw\230901_st_93_E10.raw		Control_1
Ndufaf5	A2APY7	A2APY7	F:\Yifan\20230908_singletubule_raw\230901_st_93_E2.raw	10622.5	Control_1
Ndufaf5	A2APY7	A2APY7	F:\Yifan\20230908_singletubule_raw\230901_st_93_H7.raw		Control_1
Ndufaf5	A2APY7	A2APY7	F:\Yifan\20230908_singletubule_raw\230901_st_93_F4.raw		Control_1
Ndufaf5	A2APY7	A2APY7	F:\Yifan\20230908_singletubule_raw\230901_st_93_H8.raw		Control_1
Ndufaf5	A2APY7	A2APY7	F:\Yifan\20230908_singletubule_raw\230901_st_93_D11.raw	18218.1	Control_1
Ndufaf5	A2APY7	A2APY7	F:\Yifan\20230908_singletubule_raw\230901_st_93_C3.raw		Control_1
Ndufaf5	A2APY7	A2APY7	F:\Yifan\20230908_singletubule_raw\230901_st_93_D9.raw		Control_1
Ndufaf5	A2APY7	A2APY7	F:\Yifan\20230908_singletubule_raw\230901_st_93_F11.raw	9088.92	Control_1
Ndufaf5	A2APY7	A2APY7	F:\Yifan\20230908_singletubule_raw\230901_st_93_B7.raw	22349.5	Control_1
Ndufaf5	A2APY7	A2APY7	F:\Yifan\20230908_singletubule_raw\230901_st_93_F8.raw		Control_1
Ndufaf5	A2APY7	A2APY7	F:\Yifan\20230908_singletubule_raw\230901_st_93_C8.raw		Control_1
Ndufaf5	A2APY7	A2APY7	F:\Yifan\20230908_singletubule_raw\230901_st_93_A8.raw	18538.1	Control_1
Ndufaf5	A2APY7	A2APY7	F:\Yifan\20230908_singletubule_raw\230901_st_93_G3.raw	21431	Control_1
Ndufaf5	A2APY7	A2APY7	F:\Yifan\20230908_singletubule_raw\230901_st_93_E1.raw		Control_1
Ndufaf5	A2APY7	A2APY7	F:\Yifan\20230908_singletubule_raw\230901_st_93_C2.raw		Control_1
Ndufaf5	A2APY7	A2APY7	F:\Yifan\20230908_singletubule_raw\230901_st_93_B3.raw		Control_1
Ndufaf5	A2APY7	A2APY7	F:\Yifan\20230908_singletubule_raw\230901_st_93_A7.raw		Control_1
Ndufaf5	A2APY7	A2APY7	F:\Yifan\20230908_singletubule_raw\230901_st_93_G6.raw		Control_1
Ndufaf5	A2APY7	A2APY7	F:\Yifan\20230908_singletubule_raw\230901_st_93_D7.raw		Control_1
Ndufaf5	A2APY7	A2APY7	F:\Yifan\20230908_singletubule_raw\230901_st_93_G1.raw		Control_1
Ndufaf5	A2APY7	A2APY7	F:\Yifan\20230908_singletubule_raw\230901_st_93_H6.raw		Control_1
Ndufaf5	A2APY7	A2APY7	F:\Yifan\20230908_singletubule_raw\230901_st_93_A4.raw		Control_1
Ndufaf5	A2APY7	A2APY7	F:\Yifan\20230908_singletubule_raw\230901_st_93_B8.raw		Control_1
Ndufaf5	A2APY7	A2APY7	F:\Yifan\20230908_singletubule_raw\230901_st_93_A3.raw		Control_1
Ndufaf5	A2APY7	A2APY7	F:\Yifan\20230908_singletubule_raw\230901_st_93_A1.raw		Control_1
Ndufaf5	A2APY7	A2APY7	F:\Yifan\20230908_singletubule_raw\230901_st_93_A2.raw		Control_1
Ndufaf5	A2APY7	A2APY7	F:\Yifan\20230908_singletubule_raw\230901_st_93_A6.raw		Control_1
Lrp2	A2ARV4	A2ARV4	F:\Yifan\20230908_singletubule_raw\230901_st_93_E8.raw	1085950	Control_1
Lrp2	A2ARV4	A2ARV4	F:\Yifan\20230908_singletubule_raw\230901_st_93_G10.raw	2341380	Control_1
Lrp2	A2ARV4	A2ARV4	F:\Yifan\20230908_singletubule_raw\230901_st_93_G11.raw	1912810	Control_1
Lrp2	A2ARV4	A2ARV4	F:\Yifan\20230908_singletubule_raw\230901_st_93_H10.raw	2631600	Control_1
Lrp2	A2ARV4	A2ARV4	F:\Yifan\20230908_singletubule_raw\230901_st_93_H12.raw	2711560	Control_1
Lrp2	A2ARV4	A2ARV4	F:\Yifan\20230908_singletubule_raw\230901_st_93_H3.raw	2888920	Control_1
Lrp2	A2ARV4	A2ARV4	F:\Yifan\20230908_singletubule_raw\230901_st_93_B6.raw	1933000	Control_1
Lrp2	A2ARV4	A2ARV4	F:\Yifan\20230908_singletubule_raw\230901_st_93_H11.raw	2477650	Control_1
Lrp2	A2ARV4	A2ARV4	F:\Yifan\20230908_singletubule_raw\230901_st_93_E6.raw	2386410	Control_1
Lrp2	A2ARV4	A2ARV4	F:\Yifan\20230908_singletubule_raw\230901_st_93_E7.raw	1940600	Control_1
Lrp2	A2ARV4	A2ARV4	F:\Yifan\20230908_singletubule_raw\230901_st_93_G9.raw	2458540	Control_1
Lrp2	A2ARV4	A2ARV4	F:\Yifan\20230908_singletubule_raw\230901_st_93_F10.raw	2768820	Control_1
Lrp2	A2ARV4	A2ARV4	F:\Yifan\20230908_singletubule_raw\230901_st_93_E9.raw	2121790	Control_1
Lrp2	A2ARV4	A2ARV4	F:\Yifan\20230908_singletubule_raw\230901_st_93_D10.raw	3216040	Control_1
Lrp2	A2ARV4	A2ARV4	F:\Yifan\20230908_singletubule_raw\230901_st_93_F9.raw	2302020	Control_1
Lrp2	A2ARV4	A2ARV4	F:\Yifan\20230908_singletubule_raw\230901_st_93_G7.raw	2411910	Control_1
Lrp2	A2ARV4	A2ARV4	F:\Yifan\20230908_singletubule_raw\230901_st_93_A9.raw	3429040	Control_1
Lrp2	A2ARV4	A2ARV4	F:\Yifan\20230908_singletubule_raw\230901_st_93_E3.raw	1931520	Control_1
Lrp2	A2ARV4	A2ARV4	F:\Yifan\20230908_singletubule_raw\230901_st_93_C7.raw	2629740	Control_1
Lrp2	A2ARV4	A2ARV4	F:\Yifan\20230908_singletubule_raw\230901_st_93_G4.raw	2874350	Control_1
Lrp2	A2ARV4	A2ARV4	F:\Yifan\20230908_singletubule_raw\230901_st_93_D3.raw	3024600	Control_1
Lrp2	A2ARV4	A2ARV4	F:\Yifan\20230908_singletubule_raw\230901_st_93_F2.raw	3454780	Control_1
Lrp2	A2ARV4	A2ARV4	F:\Yifan\20230908_singletubule_raw\230901_st_93_G8.raw	3059250	Control_1
Lrp2	A2ARV4	A2ARV4	F:\Yifan\20230908_singletubule_raw\230901_st_93_H4.raw	3200790	Control_1
Lrp2	A2ARV4	A2ARV4	F:\Yifan\20230908_singletubule_raw\230901_st_93_D6.raw	3033440	Control_1
Lrp2	A2ARV4	A2ARV4	F:\Yifan\20230908_singletubule_raw\230901_st_93_D4.raw	2547860	Control_1
Lrp2	A2ARV4	A2ARV4	F:\Yifan\20230908_singletubule_raw\230901_st_93_F12.raw	3010550	Control_1
Lrp2	A2ARV4	A2ARV4	F:\Yifan\20230908_singletubule_raw\230901_st_93_C9.raw	3928840	Control_1
Lrp2	A2ARV4	A2ARV4	F:\Yifan\20230908_singletubule_raw\230901_st_93_G12.raw	2490780	Control_1
Lrp2	A2ARV4	A2ARV4	F:\Yifan\20230908_singletubule_raw\230901_st_93_B10.raw	3246000	Control_1
Lrp2	A2ARV4	A2ARV4	F:\Yifan\20230908_singletubule_raw\230901_st_93_B11.raw	3179800	Control_1
Lrp2	A2ARV4	A2ARV4	F:\Yifan\20230908_singletubule_raw\230901_st_93_E11.raw	1617840	Control_1
Lrp2	A2ARV4	A2ARV4	F:\Yifan\20230908_singletubule_raw\230901_st_93_B12.raw	2748240	Control_1
Lrp2	A2ARV4	A2ARV4	F:\Yifan\20230908_singletubule_raw\230901_st_93_F3.raw	1907680	Control_1
Lrp2	A2ARV4	A2ARV4	F:\Yifan\20230908_singletubule_raw\230901_st_93_B4.raw	3234690	Control_1
Lrp2	A2ARV4	A2ARV4	F:\Yifan\20230908_singletubule_raw\230901_st_93_C11.raw	3403890	Control_1
Lrp2	A2ARV4	A2ARV4	F:\Yifan\20230908_singletubule_raw\230901_st_93_B2.raw	3138740	Control_1
Lrp2	A2ARV4	A2ARV4	F:\Yifan\20230908_singletubule_raw\230901_st_93_H9.raw	1017880	Control_1
Lrp2	A2ARV4	A2ARV4	F:\Yifan\20230908_singletubule_raw\230901_st_93_F1.raw	2959570	Control_1
Lrp2	A2ARV4	A2ARV4	F:\Yifan\20230908_singletubule_raw\230901_st_93_C12.raw	2611930	Control_1
Lrp2	A2ARV4	A2ARV4	F:\Yifan\20230908_singletubule_raw\230901_st_93_D2.raw	2942530	Control_1
Lrp2	A2ARV4	A2ARV4	F:\Yifan\20230908_singletubule_raw\230901_st_93_H2.raw	4320480	Control_1
Lrp2	A2ARV4	A2ARV4	F:\Yifan\20230908_singletubule_raw\230901_st_93_A11.raw	2274650	Control_1
Lrp2	A2ARV4	A2ARV4	F:\Yifan\20230908_singletubule_raw\230901_st_93_D1.raw	2933890	Control_1
Lrp2	A2ARV4	A2ARV4	F:\Yifan\20230908_singletubule_raw\230901_st_93_F7.raw	3825320	Control_1
Lrp2	A2ARV4	A2ARV4	F:\Yifan\20230908_singletubule_raw\230901_st_93_E4.raw	2381610	Control_1
Lrp2	A2ARV4	A2ARV4	F:\Yifan\20230908_singletubule_raw\230901_st_93_F6.raw	2619930	Control_1
Lrp2	A2ARV4	A2ARV4	F:\Yifan\20230908_singletubule_raw\230901_st_93_G2.raw	2595650	Control_1
Lrp2	A2ARV4	A2ARV4	F:\Yifan\20230908_singletubule_raw\230901_st_93_C10.raw	3705290	Control_1
Lrp2	A2ARV4	A2ARV4	F:\Yifan\20230908_singletubule_raw\230901_st_93_E12.raw	2684950	Control_1
Lrp2	A2ARV4	A2ARV4	F:\Yifan\20230908_singletubule_raw\230901_st_93_D12.raw	3342210	Control_1
Lrp2	A2ARV4	A2ARV4	F:\Yifan\20230908_singletubule_raw\230901_st_93_H1.raw	1933910	Control_1
Lrp2	A2ARV4	A2ARV4	F:\Yifan\20230908_singletubule_raw\230901_st_93_C4.raw	2420520	Control_1
Lrp2	A2ARV4	A2ARV4	F:\Yifan\20230908_singletubule_raw\230901_st_93_A10.raw	4436390	Control_1
Lrp2	A2ARV4	A2ARV4	F:\Yifan\20230908_singletubule_raw\230901_st_93_B9.raw	1843420	Control_1
Lrp2	A2ARV4	A2ARV4	F:\Yifan\20230908_singletubule_raw\230901_st_93_D8.raw	1024300	Control_1
Lrp2	A2ARV4	A2ARV4	F:\Yifan\20230908_singletubule_raw\230901_st_93_B1.raw	2716950	Control_1
Lrp2	A2ARV4	A2ARV4	F:\Yifan\20230908_singletubule_raw\230901_st_93_A12.raw	2518700	Control_1
Lrp2	A2ARV4	A2ARV4	F:\Yifan\20230908_singletubule_raw\230901_st_93_C1.raw	3078370	Control_1
Lrp2	A2ARV4	A2ARV4	F:\Yifan\20230908_singletubule_raw\230901_st_93_E10.raw	2668340	Control_1
Lrp2	A2ARV4	A2ARV4	F:\Yifan\20230908_singletubule_raw\230901_st_93_E2.raw	2387710	Control_1
Lrp2	A2ARV4	A2ARV4	F:\Yifan\20230908_singletubule_raw\230901_st_93_H7.raw	2057110	Control_1
Lrp2	A2ARV4	A2ARV4	F:\Yifan\20230908_singletubule_raw\230901_st_93_F4.raw	1575480	Control_1
Lrp2	A2ARV4	A2ARV4	F:\Yifan\20230908_singletubule_raw\230901_st_93_H8.raw	917774	Control_1
Lrp2	A2ARV4	A2ARV4	F:\Yifan\20230908_singletubule_raw\230901_st_93_D11.raw	2704650	Control_1
Lrp2	A2ARV4	A2ARV4	F:\Yifan\20230908_singletubule_raw\230901_st_93_C3.raw	2217520	Control_1
Lrp2	A2ARV4	A2ARV4	F:\Yifan\20230908_singletubule_raw\230901_st_93_D9.raw	2585820	Control_1
Lrp2	A2ARV4	A2ARV4	F:\Yifan\20230908_singletubule_raw\230901_st_93_F11.raw	2664170	Control_1
Lrp2	A2ARV4	A2ARV4	F:\Yifan\20230908_singletubule_raw\230901_st_93_B7.raw	2611290	Control_1
Lrp2	A2ARV4	A2ARV4	F:\Yifan\20230908_singletubule_raw\230901_st_93_F8.raw	2352290	Control_1
Lrp2	A2ARV4	A2ARV4	F:\Yifan\20230908_singletubule_raw\230901_st_93_C8.raw	1636820	Control_1
Lrp2	A2ARV4	A2ARV4	F:\Yifan\20230908_singletubule_raw\230901_st_93_A8.raw	2724520	Control_1
Lrp2	A2ARV4	A2ARV4	F:\Yifan\20230908_singletubule_raw\230901_st_93_G3.raw	2005710	Control_1
Lrp2	A2ARV4	A2ARV4	F:\Yifan\20230908_singletubule_raw\230901_st_93_E1.raw	2717390	Control_1
Lrp2	A2ARV4	A2ARV4	F:\Yifan\20230908_singletubule_raw\230901_st_93_C2.raw	1845940	Control_1
Lrp2	A2ARV4	A2ARV4	F:\Yifan\20230908_singletubule_raw\230901_st_93_B3.raw	3024670	Control_1
Lrp2	A2ARV4	A2ARV4	F:\Yifan\20230908_singletubule_raw\230901_st_93_A7.raw	886641	Control_1
Lrp2	A2ARV4	A2ARV4	F:\Yifan\20230908_singletubule_raw\230901_st_93_G6.raw	3075040	Control_1
Lrp2	A2ARV4	A2ARV4	F:\Yifan\20230908_singletubule_raw\230901_st_93_D7.raw	624519	Control_1
Lrp2	A2ARV4	A2ARV4	F:\Yifan\20230908_singletubule_raw\230901_st_93_G1.raw	2510660	Control_1
Lrp2	A2ARV4	A2ARV4	F:\Yifan\20230908_singletubule_raw\230901_st_93_H6.raw	295799	Control_1
Lrp2	A2ARV4	A2ARV4	F:\Yifan\20230908_singletubule_raw\230901_st_93_A4.raw	2448410	Control_1
Lrp2	A2ARV4	A2ARV4	F:\Yifan\20230908_singletubule_raw\230901_st_93_B8.raw	1842650	Control_1
Lrp2	A2ARV4	A2ARV4	F:\Yifan\20230908_singletubule_raw\230901_st_93_A3.raw	3117500	Control_1
Lrp2	A2ARV4	A2ARV4	F:\Yifan\20230908_singletubule_raw\230901_st_93_A1.raw	1438650	Control_1
Lrp2	A2ARV4	A2ARV4	F:\Yifan\20230908_singletubule_raw\230901_st_93_A2.raw	4068980	Control_1
Lrp2	A2ARV4	A2ARV4	F:\Yifan\20230908_singletubule_raw\230901_st_93_A6.raw	3509900	Control_1
Ttn	A2ASS6	A2ASS6	F:\Yifan\20230908_singletubule_raw\230901_st_93_E8.raw		Control_1
Ttn	A2ASS6	A2ASS6	F:\Yifan\20230908_singletubule_raw\230901_st_93_G10.raw		Control_1
Ttn	A2ASS6	A2ASS6	F:\Yifan\20230908_singletubule_raw\230901_st_93_G11.raw	5404.54	Control_1
Ttn	A2ASS6	A2ASS6	F:\Yifan\20230908_singletubule_raw\230901_st_93_H10.raw	7600.52	Control_1
Ttn	A2ASS6	A2ASS6	F:\Yifan\20230908_singletubule_raw\230901_st_93_H12.raw		Control_1
Ttn	A2ASS6	A2ASS6	F:\Yifan\20230908_singletubule_raw\230901_st_93_H3.raw		Control_1
Ttn	A2ASS6	A2ASS6	F:\Yifan\20230908_singletubule_raw\230901_st_93_B6.raw		Control_1
Ttn	A2ASS6	A2ASS6	F:\Yifan\20230908_singletubule_raw\230901_st_93_H11.raw	4957.54	Control_1
Ttn	A2ASS6	A2ASS6	F:\Yifan\20230908_singletubule_raw\230901_st_93_E6.raw	5349.95	Control_1
Ttn	A2ASS6	A2ASS6	F:\Yifan\20230908_singletubule_raw\230901_st_93_E7.raw		Control_1
Ttn	A2ASS6	A2ASS6	F:\Yifan\20230908_singletubule_raw\230901_st_93_G9.raw		Control_1
Ttn	A2ASS6	A2ASS6	F:\Yifan\20230908_singletubule_raw\230901_st_93_F10.raw		Control_1
Ttn	A2ASS6	A2ASS6	F:\Yifan\20230908_singletubule_raw\230901_st_93_E9.raw		Control_1
Ttn	A2ASS6	A2ASS6	F:\Yifan\20230908_singletubule_raw\230901_st_93_D10.raw		Control_1
Ttn	A2ASS6	A2ASS6	F:\Yifan\20230908_singletubule_raw\230901_st_93_F9.raw	4114.13	Control_1
Ttn	A2ASS6	A2ASS6	F:\Yifan\20230908_singletubule_raw\230901_st_93_G7.raw	7530.66	Control_1
Ttn	A2ASS6	A2ASS6	F:\Yifan\20230908_singletubule_raw\230901_st_93_A9.raw		Control_1
Ttn	A2ASS6	A2ASS6	F:\Yifan\20230908_singletubule_raw\230901_st_93_E3.raw		Control_1
Ttn	A2ASS6	A2ASS6	F:\Yifan\20230908_singletubule_raw\230901_st_93_C7.raw		Control_1
Ttn	A2ASS6	A2ASS6	F:\Yifan\20230908_singletubule_raw\230901_st_93_G4.raw		Control_1
Ttn	A2ASS6	A2ASS6	F:\Yifan\20230908_singletubule_raw\230901_st_93_D3.raw		Control_1
Ttn	A2ASS6	A2ASS6	F:\Yifan\20230908_singletubule_raw\230901_st_93_F2.raw	6886.76	Control_1
Ttn	A2ASS6	A2ASS6	F:\Yifan\20230908_singletubule_raw\230901_st_93_G8.raw		Control_1
Ttn	A2ASS6	A2ASS6	F:\Yifan\20230908_singletubule_raw\230901_st_93_H4.raw		Control_1
Ttn	A2ASS6	A2ASS6	F:\Yifan\20230908_singletubule_raw\230901_st_93_D6.raw		Control_1
Ttn	A2ASS6	A2ASS6	F:\Yifan\20230908_singletubule_raw\230901_st_93_D4.raw		Control_1
Ttn	A2ASS6	A2ASS6	F:\Yifan\20230908_singletubule_raw\230901_st_93_F12.raw		Control_1
Ttn	A2ASS6	A2ASS6	F:\Yifan\20230908_singletubule_raw\230901_st_93_C9.raw		Control_1
Ttn	A2ASS6	A2ASS6	F:\Yifan\20230908_singletubule_raw\230901_st_93_G12.raw		Control_1
Ttn	A2ASS6	A2ASS6	F:\Yifan\20230908_singletubule_raw\230901_st_93_B10.raw		Control_1
Ttn	A2ASS6	A2ASS6	F:\Yifan\20230908_singletubule_raw\230901_st_93_B11.raw		Control_1
Ttn	A2ASS6	A2ASS6	F:\Yifan\20230908_singletubule_raw\230901_st_93_E11.raw		Control_1
Ttn	A2ASS6	A2ASS6	F:\Yifan\20230908_singletubule_raw\230901_st_93_B12.raw		Control_1
Ttn	A2ASS6	A2ASS6	F:\Yifan\20230908_singletubule_raw\230901_st_93_F3.raw		Control_1
Ttn	A2ASS6	A2ASS6	F:\Yifan\20230908_singletubule_raw\230901_st_93_B4.raw	5942.2	Control_1
Ttn	A2ASS6	A2ASS6	F:\Yifan\20230908_singletubule_raw\230901_st_93_C11.raw		Control_1
Ttn	A2ASS6	A2ASS6	F:\Yifan\20230908_singletubule_raw\230901_st_93_B2.raw		Control_1
Ttn	A2ASS6	A2ASS6	F:\Yifan\20230908_singletubule_raw\230901_st_93_H9.raw		Control_1
Ttn	A2ASS6	A2ASS6	F:\Yifan\20230908_singletubule_raw\230901_st_93_F1.raw		Control_1
Ttn	A2ASS6	A2ASS6	F:\Yifan\20230908_singletubule_raw\230901_st_93_C12.raw		Control_1
Ttn	A2ASS6	A2ASS6	F:\Yifan\20230908_singletubule_raw\230901_st_93_D2.raw		Control_1
Ttn	A2ASS6	A2ASS6	F:\Yifan\20230908_singletubule_raw\230901_st_93_H2.raw	11221.2	Control_1
Ttn	A2ASS6	A2ASS6	F:\Yifan\20230908_singletubule_raw\230901_st_93_A11.raw		Control_1
Ttn	A2ASS6	A2ASS6	F:\Yifan\20230908_singletubule_raw\230901_st_93_D1.raw		Control_1
Ttn	A2ASS6	A2ASS6	F:\Yifan\20230908_singletubule_raw\230901_st_93_F7.raw		Control_1
Ttn	A2ASS6	A2ASS6	F:\Yifan\20230908_singletubule_raw\230901_st_93_E4.raw		Control_1
Ttn	A2ASS6	A2ASS6	F:\Yifan\20230908_singletubule_raw\230901_st_93_F6.raw		Control_1
Ttn	A2ASS6	A2ASS6	F:\Yifan\20230908_singletubule_raw\230901_st_93_G2.raw		Control_1
Ttn	A2ASS6	A2ASS6	F:\Yifan\20230908_singletubule_raw\230901_st_93_C10.raw	11750.1	Control_1
Ttn	A2ASS6	A2ASS6	F:\Yifan\20230908_singletubule_raw\230901_st_93_E12.raw		Control_1
Ttn	A2ASS6	A2ASS6	F:\Yifan\20230908_singletubule_raw\230901_st_93_D12.raw	6917.54	Control_1
Ttn	A2ASS6	A2ASS6	F:\Yifan\20230908_singletubule_raw\230901_st_93_H1.raw		Control_1
Ttn	A2ASS6	A2ASS6	F:\Yifan\20230908_singletubule_raw\230901_st_93_C4.raw		Control_1
Ttn	A2ASS6	A2ASS6	F:\Yifan\20230908_singletubule_raw\230901_st_93_A10.raw		Control_1
Ttn	A2ASS6	A2ASS6	F:\Yifan\20230908_singletubule_raw\230901_st_93_B9.raw		Control_1
Ttn	A2ASS6	A2ASS6	F:\Yifan\20230908_singletubule_raw\230901_st_93_D8.raw		Control_1
Ttn	A2ASS6	A2ASS6	F:\Yifan\20230908_singletubule_raw\230901_st_93_B1.raw	10467.6	Control_1
Ttn	A2ASS6	A2ASS6	F:\Yifan\20230908_singletubule_raw\230901_st_93_A12.raw		Control_1
Ttn	A2ASS6	A2ASS6	F:\Yifan\20230908_singletubule_raw\230901_st_93_C1.raw		Control_1
Ttn	A2ASS6	A2ASS6	F:\Yifan\20230908_singletubule_raw\230901_st_93_E10.raw		Control_1
Ttn	A2ASS6	A2ASS6	F:\Yifan\20230908_singletubule_raw\230901_st_93_E2.raw		Control_1
Ttn	A2ASS6	A2ASS6	F:\Yifan\20230908_singletubule_raw\230901_st_93_H7.raw		Control_1
Ttn	A2ASS6	A2ASS6	F:\Yifan\20230908_singletubule_raw\230901_st_93_F4.raw		Control_1
Ttn	A2ASS6	A2ASS6	F:\Yifan\20230908_singletubule_raw\230901_st_93_H8.raw		Control_1
Ttn	A2ASS6	A2ASS6	F:\Yifan\20230908_singletubule_raw\230901_st_93_D11.raw		Control_1
Ttn	A2ASS6	A2ASS6	F:\Yifan\20230908_singletubule_raw\230901_st_93_C3.raw		Control_1
Ttn	A2ASS6	A2ASS6	F:\Yifan\20230908_singletubule_raw\230901_st_93_D9.raw		Control_1
Ttn	A2ASS6	A2ASS6	F:\Yifan\20230908_singletubule_raw\230901_st_93_F11.raw		Control_1
Ttn	A2ASS6	A2ASS6	F:\Yifan\20230908_singletubule_raw\230901_st_93_B7.raw		Control_1
Ttn	A2ASS6	A2ASS6	F:\Yifan\20230908_singletubule_raw\230901_st_93_F8.raw		Control_1
Ttn	A2ASS6	A2ASS6	F:\Yifan\20230908_singletubule_raw\230901_st_93_C8.raw	9355.59	Control_1
Ttn	A2ASS6	A2ASS6	F:\Yifan\20230908_singletubule_raw\230901_st_93_A8.raw		Control_1
Ttn	A2ASS6	A2ASS6	F:\Yifan\20230908_singletubule_raw\230901_st_93_G3.raw		Control_1
Ttn	A2ASS6	A2ASS6	F:\Yifan\20230908_singletubule_raw\230901_st_93_E1.raw		Control_1
Ttn	A2ASS6	A2ASS6	F:\Yifan\20230908_singletubule_raw\230901_st_93_C2.raw		Control_1
Ttn	A2ASS6	A2ASS6	F:\Yifan\20230908_singletubule_raw\230901_st_93_B3.raw		Control_1
Ttn	A2ASS6	A2ASS6	F:\Yifan\20230908_singletubule_raw\230901_st_93_A7.raw		Control_1
Ttn	A2ASS6	A2ASS6	F:\Yifan\20230908_singletubule_raw\230901_st_93_G6.raw		Control_1
Ttn	A2ASS6	A2ASS6	F:\Yifan\20230908_singletubule_raw\230901_st_93_D7.raw		Control_1
Ttn	A2ASS6	A2ASS6	F:\Yifan\20230908_singletubule_raw\230901_st_93_G1.raw	13272.7	Control_1
Ttn	A2ASS6	A2ASS6	F:\Yifan\20230908_singletubule_raw\230901_st_93_H6.raw		Control_1
Ttn	A2ASS6	A2ASS6	F:\Yifan\20230908_singletubule_raw\230901_st_93_A4.raw		Control_1
Ttn	A2ASS6	A2ASS6	F:\Yifan\20230908_singletubule_raw\230901_st_93_B8.raw		Control_1
Ttn	A2ASS6	A2ASS6	F:\Yifan\20230908_singletubule_raw\230901_st_93_A3.raw		Control_1
Ttn	A2ASS6	A2ASS6	F:\Yifan\20230908_singletubule_raw\230901_st_93_A1.raw		Control_1
Ttn	A2ASS6	A2ASS6	F:\Yifan\20230908_singletubule_raw\230901_st_93_A2.raw		Control_1
Ttn	A2ASS6	A2ASS6	F:\Yifan\20230908_singletubule_raw\230901_st_93_A6.raw		Control_1
Dhtkd1	A2ATU0	A2ATU0	F:\Yifan\20230908_singletubule_raw\230901_st_93_E8.raw	37090.4	Control_1
Dhtkd1	A2ATU0	A2ATU0	F:\Yifan\20230908_singletubule_raw\230901_st_93_G10.raw	74545.6	Control_1
Dhtkd1	A2ATU0	A2ATU0	F:\Yifan\20230908_singletubule_raw\230901_st_93_G11.raw	115592	Control_1
Dhtkd1	A2ATU0	A2ATU0	F:\Yifan\20230908_singletubule_raw\230901_st_93_H10.raw	171597	Control_1
Dhtkd1	A2ATU0	A2ATU0	F:\Yifan\20230908_singletubule_raw\230901_st_93_H12.raw	61641	Control_1
Dhtkd1	A2ATU0	A2ATU0	F:\Yifan\20230908_singletubule_raw\230901_st_93_H3.raw	96593	Control_1
Dhtkd1	A2ATU0	A2ATU0	F:\Yifan\20230908_singletubule_raw\230901_st_93_B6.raw	104848	Control_1
Dhtkd1	A2ATU0	A2ATU0	F:\Yifan\20230908_singletubule_raw\230901_st_93_H11.raw	183286	Control_1
Dhtkd1	A2ATU0	A2ATU0	F:\Yifan\20230908_singletubule_raw\230901_st_93_E6.raw	116389	Control_1
Dhtkd1	A2ATU0	A2ATU0	F:\Yifan\20230908_singletubule_raw\230901_st_93_E7.raw	122505	Control_1
Dhtkd1	A2ATU0	A2ATU0	F:\Yifan\20230908_singletubule_raw\230901_st_93_G9.raw	45685.6	Control_1
Dhtkd1	A2ATU0	A2ATU0	F:\Yifan\20230908_singletubule_raw\230901_st_93_F10.raw	79359	Control_1
Dhtkd1	A2ATU0	A2ATU0	F:\Yifan\20230908_singletubule_raw\230901_st_93_E9.raw	45695.5	Control_1
Dhtkd1	A2ATU0	A2ATU0	F:\Yifan\20230908_singletubule_raw\230901_st_93_D10.raw	131667	Control_1
Dhtkd1	A2ATU0	A2ATU0	F:\Yifan\20230908_singletubule_raw\230901_st_93_F9.raw	110856	Control_1
Dhtkd1	A2ATU0	A2ATU0	F:\Yifan\20230908_singletubule_raw\230901_st_93_G7.raw	59915.1	Control_1
Dhtkd1	A2ATU0	A2ATU0	F:\Yifan\20230908_singletubule_raw\230901_st_93_A9.raw	174228	Control_1
Dhtkd1	A2ATU0	A2ATU0	F:\Yifan\20230908_singletubule_raw\230901_st_93_E3.raw	45525.9	Control_1
Dhtkd1	A2ATU0	A2ATU0	F:\Yifan\20230908_singletubule_raw\230901_st_93_C7.raw	78167.1	Control_1
Dhtkd1	A2ATU0	A2ATU0	F:\Yifan\20230908_singletubule_raw\230901_st_93_G4.raw	114122	Control_1
Dhtkd1	A2ATU0	A2ATU0	F:\Yifan\20230908_singletubule_raw\230901_st_93_D3.raw	70811.3	Control_1
Dhtkd1	A2ATU0	A2ATU0	F:\Yifan\20230908_singletubule_raw\230901_st_93_F2.raw	127549	Control_1
Dhtkd1	A2ATU0	A2ATU0	F:\Yifan\20230908_singletubule_raw\230901_st_93_G8.raw	120003	Control_1
Dhtkd1	A2ATU0	A2ATU0	F:\Yifan\20230908_singletubule_raw\230901_st_93_H4.raw	67157.8	Control_1
Dhtkd1	A2ATU0	A2ATU0	F:\Yifan\20230908_singletubule_raw\230901_st_93_D6.raw	70435.5	Control_1
Dhtkd1	A2ATU0	A2ATU0	F:\Yifan\20230908_singletubule_raw\230901_st_93_D4.raw	161921	Control_1
Dhtkd1	A2ATU0	A2ATU0	F:\Yifan\20230908_singletubule_raw\230901_st_93_F12.raw	169941	Control_1
Dhtkd1	A2ATU0	A2ATU0	F:\Yifan\20230908_singletubule_raw\230901_st_93_C9.raw	47514.1	Control_1
Dhtkd1	A2ATU0	A2ATU0	F:\Yifan\20230908_singletubule_raw\230901_st_93_G12.raw	144574	Control_1
Dhtkd1	A2ATU0	A2ATU0	F:\Yifan\20230908_singletubule_raw\230901_st_93_B10.raw	111193	Control_1
Dhtkd1	A2ATU0	A2ATU0	F:\Yifan\20230908_singletubule_raw\230901_st_93_B11.raw	103859	Control_1
Dhtkd1	A2ATU0	A2ATU0	F:\Yifan\20230908_singletubule_raw\230901_st_93_E11.raw	144068	Control_1
Dhtkd1	A2ATU0	A2ATU0	F:\Yifan\20230908_singletubule_raw\230901_st_93_B12.raw	69623.5	Control_1
Dhtkd1	A2ATU0	A2ATU0	F:\Yifan\20230908_singletubule_raw\230901_st_93_F3.raw	101119	Control_1
Dhtkd1	A2ATU0	A2ATU0	F:\Yifan\20230908_singletubule_raw\230901_st_93_B4.raw	93554	Control_1
Dhtkd1	A2ATU0	A2ATU0	F:\Yifan\20230908_singletubule_raw\230901_st_93_C11.raw	109121	Control_1
Dhtkd1	A2ATU0	A2ATU0	F:\Yifan\20230908_singletubule_raw\230901_st_93_B2.raw	174243	Control_1
Dhtkd1	A2ATU0	A2ATU0	F:\Yifan\20230908_singletubule_raw\230901_st_93_H9.raw	131560	Control_1
Dhtkd1	A2ATU0	A2ATU0	F:\Yifan\20230908_singletubule_raw\230901_st_93_F1.raw	117704	Control_1
Dhtkd1	A2ATU0	A2ATU0	F:\Yifan\20230908_singletubule_raw\230901_st_93_C12.raw	150032	Control_1
Dhtkd1	A2ATU0	A2ATU0	F:\Yifan\20230908_singletubule_raw\230901_st_93_D2.raw	203632	Control_1
Dhtkd1	A2ATU0	A2ATU0	F:\Yifan\20230908_singletubule_raw\230901_st_93_H2.raw	91655.9	Control_1
Dhtkd1	A2ATU0	A2ATU0	F:\Yifan\20230908_singletubule_raw\230901_st_93_A11.raw	96516.7	Control_1
Dhtkd1	A2ATU0	A2ATU0	F:\Yifan\20230908_singletubule_raw\230901_st_93_D1.raw	69381.4	Control_1
Dhtkd1	A2ATU0	A2ATU0	F:\Yifan\20230908_singletubule_raw\230901_st_93_F7.raw	185183	Control_1
Dhtkd1	A2ATU0	A2ATU0	F:\Yifan\20230908_singletubule_raw\230901_st_93_E4.raw	94909.7	Control_1
Dhtkd1	A2ATU0	A2ATU0	F:\Yifan\20230908_singletubule_raw\230901_st_93_F6.raw	227140	Control_1
Dhtkd1	A2ATU0	A2ATU0	F:\Yifan\20230908_singletubule_raw\230901_st_93_G2.raw	109218	Control_1
Dhtkd1	A2ATU0	A2ATU0	F:\Yifan\20230908_singletubule_raw\230901_st_93_C10.raw	181859	Control_1
Dhtkd1	A2ATU0	A2ATU0	F:\Yifan\20230908_singletubule_raw\230901_st_93_E12.raw	210073	Control_1
Dhtkd1	A2ATU0	A2ATU0	F:\Yifan\20230908_singletubule_raw\230901_st_93_D12.raw	107400	Control_1
Dhtkd1	A2ATU0	A2ATU0	F:\Yifan\20230908_singletubule_raw\230901_st_93_H1.raw	132088	Control_1
Dhtkd1	A2ATU0	A2ATU0	F:\Yifan\20230908_singletubule_raw\230901_st_93_C4.raw	179897	Control_1
Dhtkd1	A2ATU0	A2ATU0	F:\Yifan\20230908_singletubule_raw\230901_st_93_A10.raw	100881	Control_1
Dhtkd1	A2ATU0	A2ATU0	F:\Yifan\20230908_singletubule_raw\230901_st_93_B9.raw	58036.3	Control_1
Dhtkd1	A2ATU0	A2ATU0	F:\Yifan\20230908_singletubule_raw\230901_st_93_D8.raw	101163	Control_1
Dhtkd1	A2ATU0	A2ATU0	F:\Yifan\20230908_singletubule_raw\230901_st_93_B1.raw	111869	Control_1
Dhtkd1	A2ATU0	A2ATU0	F:\Yifan\20230908_singletubule_raw\230901_st_93_A12.raw	145220	Control_1
Dhtkd1	A2ATU0	A2ATU0	F:\Yifan\20230908_singletubule_raw\230901_st_93_C1.raw	101021	Control_1
Dhtkd1	A2ATU0	A2ATU0	F:\Yifan\20230908_singletubule_raw\230901_st_93_E10.raw	262545	Control_1
Dhtkd1	A2ATU0	A2ATU0	F:\Yifan\20230908_singletubule_raw\230901_st_93_E2.raw	169151	Control_1
Dhtkd1	A2ATU0	A2ATU0	F:\Yifan\20230908_singletubule_raw\230901_st_93_H7.raw	148806	Control_1
Dhtkd1	A2ATU0	A2ATU0	F:\Yifan\20230908_singletubule_raw\230901_st_93_F4.raw	128225	Control_1
Dhtkd1	A2ATU0	A2ATU0	F:\Yifan\20230908_singletubule_raw\230901_st_93_H8.raw	181051	Control_1
Dhtkd1	A2ATU0	A2ATU0	F:\Yifan\20230908_singletubule_raw\230901_st_93_D11.raw	231941	Control_1
Dhtkd1	A2ATU0	A2ATU0	F:\Yifan\20230908_singletubule_raw\230901_st_93_C3.raw	68604.1	Control_1
Dhtkd1	A2ATU0	A2ATU0	F:\Yifan\20230908_singletubule_raw\230901_st_93_D9.raw	71563	Control_1
Dhtkd1	A2ATU0	A2ATU0	F:\Yifan\20230908_singletubule_raw\230901_st_93_F11.raw	97021.4	Control_1
Dhtkd1	A2ATU0	A2ATU0	F:\Yifan\20230908_singletubule_raw\230901_st_93_B7.raw	196051	Control_1
Dhtkd1	A2ATU0	A2ATU0	F:\Yifan\20230908_singletubule_raw\230901_st_93_F8.raw	260419	Control_1
Dhtkd1	A2ATU0	A2ATU0	F:\Yifan\20230908_singletubule_raw\230901_st_93_C8.raw	169333	Control_1
Dhtkd1	A2ATU0	A2ATU0	F:\Yifan\20230908_singletubule_raw\230901_st_93_A8.raw	227528	Control_1
Dhtkd1	A2ATU0	A2ATU0	F:\Yifan\20230908_singletubule_raw\230901_st_93_G3.raw	149865	Control_1
Dhtkd1	A2ATU0	A2ATU0	F:\Yifan\20230908_singletubule_raw\230901_st_93_E1.raw	208792	Control_1
Dhtkd1	A2ATU0	A2ATU0	F:\Yifan\20230908_singletubule_raw\230901_st_93_C2.raw	114121	Control_1
Dhtkd1	A2ATU0	A2ATU0	F:\Yifan\20230908_singletubule_raw\230901_st_93_B3.raw	184177	Control_1
Dhtkd1	A2ATU0	A2ATU0	F:\Yifan\20230908_singletubule_raw\230901_st_93_A7.raw		Control_1
Dhtkd1	A2ATU0	A2ATU0	F:\Yifan\20230908_singletubule_raw\230901_st_93_G6.raw	124877	Control_1
Dhtkd1	A2ATU0	A2ATU0	F:\Yifan\20230908_singletubule_raw\230901_st_93_D7.raw	179899	Control_1
Dhtkd1	A2ATU0	A2ATU0	F:\Yifan\20230908_singletubule_raw\230901_st_93_G1.raw	112346	Control_1
Dhtkd1	A2ATU0	A2ATU0	F:\Yifan\20230908_singletubule_raw\230901_st_93_H6.raw		Control_1
Dhtkd1	A2ATU0	A2ATU0	F:\Yifan\20230908_singletubule_raw\230901_st_93_A4.raw		Control_1
Dhtkd1	A2ATU0	A2ATU0	F:\Yifan\20230908_singletubule_raw\230901_st_93_B8.raw		Control_1
Dhtkd1	A2ATU0	A2ATU0	F:\Yifan\20230908_singletubule_raw\230901_st_93_A3.raw	95535.8	Control_1
Dhtkd1	A2ATU0	A2ATU0	F:\Yifan\20230908_singletubule_raw\230901_st_93_A1.raw		Control_1
Dhtkd1	A2ATU0	A2ATU0	F:\Yifan\20230908_singletubule_raw\230901_st_93_A2.raw		Control_1
Dhtkd1	A2ATU0	A2ATU0	F:\Yifan\20230908_singletubule_raw\230901_st_93_A6.raw		Control_1
Mocs3	A2BDX3	A2BDX3	F:\Yifan\20230908_singletubule_raw\230901_st_93_E8.raw		Control_1
Mocs3	A2BDX3	A2BDX3	F:\Yifan\20230908_singletubule_raw\230901_st_93_G10.raw	6321.54	Control_1
Mocs3	A2BDX3	A2BDX3	F:\Yifan\20230908_singletubule_raw\230901_st_93_G11.raw	6506.85	Control_1
Mocs3	A2BDX3	A2BDX3	F:\Yifan\20230908_singletubule_raw\230901_st_93_H10.raw		Control_1
Mocs3	A2BDX3	A2BDX3	F:\Yifan\20230908_singletubule_raw\230901_st_93_H12.raw	14489.5	Control_1
Mocs3	A2BDX3	A2BDX3	F:\Yifan\20230908_singletubule_raw\230901_st_93_H3.raw	18358.2	Control_1
Mocs3	A2BDX3	A2BDX3	F:\Yifan\20230908_singletubule_raw\230901_st_93_B6.raw		Control_1
Mocs3	A2BDX3	A2BDX3	F:\Yifan\20230908_singletubule_raw\230901_st_93_H11.raw		Control_1
Mocs3	A2BDX3	A2BDX3	F:\Yifan\20230908_singletubule_raw\230901_st_93_E6.raw		Control_1
Mocs3	A2BDX3	A2BDX3	F:\Yifan\20230908_singletubule_raw\230901_st_93_E7.raw		Control_1
Mocs3	A2BDX3	A2BDX3	F:\Yifan\20230908_singletubule_raw\230901_st_93_G9.raw	20931.8	Control_1
Mocs3	A2BDX3	A2BDX3	F:\Yifan\20230908_singletubule_raw\230901_st_93_F10.raw	10608.8	Control_1
Mocs3	A2BDX3	A2BDX3	F:\Yifan\20230908_singletubule_raw\230901_st_93_E9.raw	19500.5	Control_1
Mocs3	A2BDX3	A2BDX3	F:\Yifan\20230908_singletubule_raw\230901_st_93_D10.raw		Control_1
Mocs3	A2BDX3	A2BDX3	F:\Yifan\20230908_singletubule_raw\230901_st_93_F9.raw	11278.3	Control_1
Mocs3	A2BDX3	A2BDX3	F:\Yifan\20230908_singletubule_raw\230901_st_93_G7.raw		Control_1
Mocs3	A2BDX3	A2BDX3	F:\Yifan\20230908_singletubule_raw\230901_st_93_A9.raw		Control_1
Mocs3	A2BDX3	A2BDX3	F:\Yifan\20230908_singletubule_raw\230901_st_93_E3.raw	9770.05	Control_1
Mocs3	A2BDX3	A2BDX3	F:\Yifan\20230908_singletubule_raw\230901_st_93_C7.raw	15458.6	Control_1
Mocs3	A2BDX3	A2BDX3	F:\Yifan\20230908_singletubule_raw\230901_st_93_G4.raw	4618.9	Control_1
Mocs3	A2BDX3	A2BDX3	F:\Yifan\20230908_singletubule_raw\230901_st_93_D3.raw		Control_1
Mocs3	A2BDX3	A2BDX3	F:\Yifan\20230908_singletubule_raw\230901_st_93_F2.raw	5522.63	Control_1
Mocs3	A2BDX3	A2BDX3	F:\Yifan\20230908_singletubule_raw\230901_st_93_G8.raw	17399.2	Control_1
Mocs3	A2BDX3	A2BDX3	F:\Yifan\20230908_singletubule_raw\230901_st_93_H4.raw		Control_1
Mocs3	A2BDX3	A2BDX3	F:\Yifan\20230908_singletubule_raw\230901_st_93_D6.raw		Control_1
Mocs3	A2BDX3	A2BDX3	F:\Yifan\20230908_singletubule_raw\230901_st_93_D4.raw	9932.2	Control_1
Mocs3	A2BDX3	A2BDX3	F:\Yifan\20230908_singletubule_raw\230901_st_93_F12.raw	19860.7	Control_1
Mocs3	A2BDX3	A2BDX3	F:\Yifan\20230908_singletubule_raw\230901_st_93_C9.raw		Control_1
Mocs3	A2BDX3	A2BDX3	F:\Yifan\20230908_singletubule_raw\230901_st_93_G12.raw		Control_1
Mocs3	A2BDX3	A2BDX3	F:\Yifan\20230908_singletubule_raw\230901_st_93_B10.raw		Control_1
Mocs3	A2BDX3	A2BDX3	F:\Yifan\20230908_singletubule_raw\230901_st_93_B11.raw	13835.6	Control_1
Mocs3	A2BDX3	A2BDX3	F:\Yifan\20230908_singletubule_raw\230901_st_93_E11.raw	7952.86	Control_1
Mocs3	A2BDX3	A2BDX3	F:\Yifan\20230908_singletubule_raw\230901_st_93_B12.raw		Control_1
Mocs3	A2BDX3	A2BDX3	F:\Yifan\20230908_singletubule_raw\230901_st_93_F3.raw	9323.36	Control_1
Mocs3	A2BDX3	A2BDX3	F:\Yifan\20230908_singletubule_raw\230901_st_93_B4.raw		Control_1
Mocs3	A2BDX3	A2BDX3	F:\Yifan\20230908_singletubule_raw\230901_st_93_C11.raw		Control_1
Mocs3	A2BDX3	A2BDX3	F:\Yifan\20230908_singletubule_raw\230901_st_93_B2.raw		Control_1
Mocs3	A2BDX3	A2BDX3	F:\Yifan\20230908_singletubule_raw\230901_st_93_H9.raw		Control_1
Mocs3	A2BDX3	A2BDX3	F:\Yifan\20230908_singletubule_raw\230901_st_93_F1.raw		Control_1
Mocs3	A2BDX3	A2BDX3	F:\Yifan\20230908_singletubule_raw\230901_st_93_C12.raw	16042.9	Control_1
Mocs3	A2BDX3	A2BDX3	F:\Yifan\20230908_singletubule_raw\230901_st_93_D2.raw		Control_1
Mocs3	A2BDX3	A2BDX3	F:\Yifan\20230908_singletubule_raw\230901_st_93_H2.raw	14476.9	Control_1
Mocs3	A2BDX3	A2BDX3	F:\Yifan\20230908_singletubule_raw\230901_st_93_A11.raw	10519.9	Control_1
Mocs3	A2BDX3	A2BDX3	F:\Yifan\20230908_singletubule_raw\230901_st_93_D1.raw		Control_1
Mocs3	A2BDX3	A2BDX3	F:\Yifan\20230908_singletubule_raw\230901_st_93_F7.raw		Control_1
Mocs3	A2BDX3	A2BDX3	F:\Yifan\20230908_singletubule_raw\230901_st_93_E4.raw	20735.9	Control_1
Mocs3	A2BDX3	A2BDX3	F:\Yifan\20230908_singletubule_raw\230901_st_93_F6.raw		Control_1
Mocs3	A2BDX3	A2BDX3	F:\Yifan\20230908_singletubule_raw\230901_st_93_G2.raw		Control_1
Mocs3	A2BDX3	A2BDX3	F:\Yifan\20230908_singletubule_raw\230901_st_93_C10.raw	12298.2	Control_1
Mocs3	A2BDX3	A2BDX3	F:\Yifan\20230908_singletubule_raw\230901_st_93_E12.raw		Control_1
Mocs3	A2BDX3	A2BDX3	F:\Yifan\20230908_singletubule_raw\230901_st_93_D12.raw	27787.6	Control_1
Mocs3	A2BDX3	A2BDX3	F:\Yifan\20230908_singletubule_raw\230901_st_93_H1.raw	13180.1	Control_1
Mocs3	A2BDX3	A2BDX3	F:\Yifan\20230908_singletubule_raw\230901_st_93_C4.raw		Control_1
Mocs3	A2BDX3	A2BDX3	F:\Yifan\20230908_singletubule_raw\230901_st_93_A10.raw	6122.2	Control_1
Mocs3	A2BDX3	A2BDX3	F:\Yifan\20230908_singletubule_raw\230901_st_93_B9.raw	10687.3	Control_1
Mocs3	A2BDX3	A2BDX3	F:\Yifan\20230908_singletubule_raw\230901_st_93_D8.raw		Control_1
Mocs3	A2BDX3	A2BDX3	F:\Yifan\20230908_singletubule_raw\230901_st_93_B1.raw		Control_1
Mocs3	A2BDX3	A2BDX3	F:\Yifan\20230908_singletubule_raw\230901_st_93_A12.raw		Control_1
Mocs3	A2BDX3	A2BDX3	F:\Yifan\20230908_singletubule_raw\230901_st_93_C1.raw		Control_1
Mocs3	A2BDX3	A2BDX3	F:\Yifan\20230908_singletubule_raw\230901_st_93_E10.raw		Control_1
Mocs3	A2BDX3	A2BDX3	F:\Yifan\20230908_singletubule_raw\230901_st_93_E2.raw		Control_1
Mocs3	A2BDX3	A2BDX3	F:\Yifan\20230908_singletubule_raw\230901_st_93_H7.raw		Control_1
Mocs3	A2BDX3	A2BDX3	F:\Yifan\20230908_singletubule_raw\230901_st_93_F4.raw		Control_1
Mocs3	A2BDX3	A2BDX3	F:\Yifan\20230908_singletubule_raw\230901_st_93_H8.raw		Control_1
Mocs3	A2BDX3	A2BDX3	F:\Yifan\20230908_singletubule_raw\230901_st_93_D11.raw		Control_1
Mocs3	A2BDX3	A2BDX3	F:\Yifan\20230908_singletubule_raw\230901_st_93_C3.raw		Control_1
Mocs3	A2BDX3	A2BDX3	F:\Yifan\20230908_singletubule_raw\230901_st_93_D9.raw	26569.5	Control_1
Mocs3	A2BDX3	A2BDX3	F:\Yifan\20230908_singletubule_raw\230901_st_93_F11.raw	24136.1	Control_1
Mocs3	A2BDX3	A2BDX3	F:\Yifan\20230908_singletubule_raw\230901_st_93_B7.raw		Control_1
Mocs3	A2BDX3	A2BDX3	F:\Yifan\20230908_singletubule_raw\230901_st_93_F8.raw		Control_1
Mocs3	A2BDX3	A2BDX3	F:\Yifan\20230908_singletubule_raw\230901_st_93_C8.raw		Control_1
Mocs3	A2BDX3	A2BDX3	F:\Yifan\20230908_singletubule_raw\230901_st_93_A8.raw		Control_1
Mocs3	A2BDX3	A2BDX3	F:\Yifan\20230908_singletubule_raw\230901_st_93_G3.raw		Control_1
Mocs3	A2BDX3	A2BDX3	F:\Yifan\20230908_singletubule_raw\230901_st_93_E1.raw		Control_1
Mocs3	A2BDX3	A2BDX3	F:\Yifan\20230908_singletubule_raw\230901_st_93_C2.raw		Control_1
Mocs3	A2BDX3	A2BDX3	F:\Yifan\20230908_singletubule_raw\230901_st_93_B3.raw		Control_1
Mocs3	A2BDX3	A2BDX3	F:\Yifan\20230908_singletubule_raw\230901_st_93_A7.raw		Control_1
Mocs3	A2BDX3	A2BDX3	F:\Yifan\20230908_singletubule_raw\230901_st_93_G6.raw		Control_1
Mocs3	A2BDX3	A2BDX3	F:\Yifan\20230908_singletubule_raw\230901_st_93_D7.raw		Control_1
Mocs3	A2BDX3	A2BDX3	F:\Yifan\20230908_singletubule_raw\230901_st_93_G1.raw		Control_1
Mocs3	A2BDX3	A2BDX3	F:\Yifan\20230908_singletubule_raw\230901_st_93_H6.raw		Control_1
Mocs3	A2BDX3	A2BDX3	F:\Yifan\20230908_singletubule_raw\230901_st_93_A4.raw		Control_1
Mocs3	A2BDX3	A2BDX3	F:\Yifan\20230908_singletubule_raw\230901_st_93_B8.raw		Control_1
Mocs3	A2BDX3	A2BDX3	F:\Yifan\20230908_singletubule_raw\230901_st_93_A3.raw		Control_1
Mocs3	A2BDX3	A2BDX3	F:\Yifan\20230908_singletubule_raw\230901_st_93_A1.raw		Control_1
Mocs3	A2BDX3	A2BDX3	F:\Yifan\20230908_singletubule_raw\230901_st_93_A2.raw		Control_1
Mocs3	A2BDX3	A2BDX3	F:\Yifan\20230908_singletubule_raw\230901_st_93_A6.raw		Control_1
Las1l	A2BE28	A2BE28	F:\Yifan\20230908_singletubule_raw\230901_st_93_E8.raw	10046.1	Control_1
Las1l	A2BE28	A2BE28	F:\Yifan\20230908_singletubule_raw\230901_st_93_G10.raw	11476.6	Control_1
Las1l	A2BE28	A2BE28	F:\Yifan\20230908_singletubule_raw\230901_st_93_G11.raw		Control_1
Las1l	A2BE28	A2BE28	F:\Yifan\20230908_singletubule_raw\230901_st_93_H10.raw	7794.09	Control_1
Las1l	A2BE28	A2BE28	F:\Yifan\20230908_singletubule_raw\230901_st_93_H12.raw		Control_1
Las1l	A2BE28	A2BE28	F:\Yifan\20230908_singletubule_raw\230901_st_93_H3.raw	11078.1	Control_1
Las1l	A2BE28	A2BE28	F:\Yifan\20230908_singletubule_raw\230901_st_93_B6.raw	7944.42	Control_1
Las1l	A2BE28	A2BE28	F:\Yifan\20230908_singletubule_raw\230901_st_93_H11.raw	6708	Control_1
Las1l	A2BE28	A2BE28	F:\Yifan\20230908_singletubule_raw\230901_st_93_E6.raw		Control_1
Las1l	A2BE28	A2BE28	F:\Yifan\20230908_singletubule_raw\230901_st_93_E7.raw		Control_1
Las1l	A2BE28	A2BE28	F:\Yifan\20230908_singletubule_raw\230901_st_93_G9.raw	8687.41	Control_1
Las1l	A2BE28	A2BE28	F:\Yifan\20230908_singletubule_raw\230901_st_93_F10.raw		Control_1
Las1l	A2BE28	A2BE28	F:\Yifan\20230908_singletubule_raw\230901_st_93_E9.raw	11595.5	Control_1
Las1l	A2BE28	A2BE28	F:\Yifan\20230908_singletubule_raw\230901_st_93_D10.raw		Control_1
Las1l	A2BE28	A2BE28	F:\Yifan\20230908_singletubule_raw\230901_st_93_F9.raw	6567.89	Control_1
Las1l	A2BE28	A2BE28	F:\Yifan\20230908_singletubule_raw\230901_st_93_G7.raw		Control_1
Las1l	A2BE28	A2BE28	F:\Yifan\20230908_singletubule_raw\230901_st_93_A9.raw		Control_1
Las1l	A2BE28	A2BE28	F:\Yifan\20230908_singletubule_raw\230901_st_93_E3.raw	11220.7	Control_1
Las1l	A2BE28	A2BE28	F:\Yifan\20230908_singletubule_raw\230901_st_93_C7.raw	6784.85	Control_1
Las1l	A2BE28	A2BE28	F:\Yifan\20230908_singletubule_raw\230901_st_93_G4.raw		Control_1
Las1l	A2BE28	A2BE28	F:\Yifan\20230908_singletubule_raw\230901_st_93_D3.raw		Control_1
Las1l	A2BE28	A2BE28	F:\Yifan\20230908_singletubule_raw\230901_st_93_F2.raw		Control_1
Las1l	A2BE28	A2BE28	F:\Yifan\20230908_singletubule_raw\230901_st_93_G8.raw	7924.39	Control_1
Las1l	A2BE28	A2BE28	F:\Yifan\20230908_singletubule_raw\230901_st_93_H4.raw		Control_1
Las1l	A2BE28	A2BE28	F:\Yifan\20230908_singletubule_raw\230901_st_93_D6.raw		Control_1
Las1l	A2BE28	A2BE28	F:\Yifan\20230908_singletubule_raw\230901_st_93_D4.raw	4807.91	Control_1
Las1l	A2BE28	A2BE28	F:\Yifan\20230908_singletubule_raw\230901_st_93_F12.raw	7814.12	Control_1
Las1l	A2BE28	A2BE28	F:\Yifan\20230908_singletubule_raw\230901_st_93_C9.raw		Control_1
Las1l	A2BE28	A2BE28	F:\Yifan\20230908_singletubule_raw\230901_st_93_G12.raw		Control_1
Las1l	A2BE28	A2BE28	F:\Yifan\20230908_singletubule_raw\230901_st_93_B10.raw		Control_1
Las1l	A2BE28	A2BE28	F:\Yifan\20230908_singletubule_raw\230901_st_93_B11.raw		Control_1
Las1l	A2BE28	A2BE28	F:\Yifan\20230908_singletubule_raw\230901_st_93_E11.raw		Control_1
Las1l	A2BE28	A2BE28	F:\Yifan\20230908_singletubule_raw\230901_st_93_B12.raw		Control_1
Las1l	A2BE28	A2BE28	F:\Yifan\20230908_singletubule_raw\230901_st_93_F3.raw	4526.2	Control_1
Las1l	A2BE28	A2BE28	F:\Yifan\20230908_singletubule_raw\230901_st_93_B4.raw		Control_1
Las1l	A2BE28	A2BE28	F:\Yifan\20230908_singletubule_raw\230901_st_93_C11.raw		Control_1
Las1l	A2BE28	A2BE28	F:\Yifan\20230908_singletubule_raw\230901_st_93_B2.raw		Control_1
Las1l	A2BE28	A2BE28	F:\Yifan\20230908_singletubule_raw\230901_st_93_H9.raw		Control_1
Las1l	A2BE28	A2BE28	F:\Yifan\20230908_singletubule_raw\230901_st_93_F1.raw		Control_1
Las1l	A2BE28	A2BE28	F:\Yifan\20230908_singletubule_raw\230901_st_93_C12.raw	8988.53	Control_1
Las1l	A2BE28	A2BE28	F:\Yifan\20230908_singletubule_raw\230901_st_93_D2.raw		Control_1
Las1l	A2BE28	A2BE28	F:\Yifan\20230908_singletubule_raw\230901_st_93_H2.raw		Control_1
Las1l	A2BE28	A2BE28	F:\Yifan\20230908_singletubule_raw\230901_st_93_A11.raw		Control_1
Las1l	A2BE28	A2BE28	F:\Yifan\20230908_singletubule_raw\230901_st_93_D1.raw		Control_1
Las1l	A2BE28	A2BE28	F:\Yifan\20230908_singletubule_raw\230901_st_93_F7.raw	6277.25	Control_1
Las1l	A2BE28	A2BE28	F:\Yifan\20230908_singletubule_raw\230901_st_93_E4.raw		Control_1
Las1l	A2BE28	A2BE28	F:\Yifan\20230908_singletubule_raw\230901_st_93_F6.raw		Control_1
Las1l	A2BE28	A2BE28	F:\Yifan\20230908_singletubule_raw\230901_st_93_G2.raw		Control_1
Las1l	A2BE28	A2BE28	F:\Yifan\20230908_singletubule_raw\230901_st_93_C10.raw		Control_1
Las1l	A2BE28	A2BE28	F:\Yifan\20230908_singletubule_raw\230901_st_93_E12.raw		Control_1
Las1l	A2BE28	A2BE28	F:\Yifan\20230908_singletubule_raw\230901_st_93_D12.raw	5518.15	Control_1
Las1l	A2BE28	A2BE28	F:\Yifan\20230908_singletubule_raw\230901_st_93_H1.raw		Control_1
Las1l	A2BE28	A2BE28	F:\Yifan\20230908_singletubule_raw\230901_st_93_C4.raw		Control_1
Las1l	A2BE28	A2BE28	F:\Yifan\20230908_singletubule_raw\230901_st_93_A10.raw		Control_1
Las1l	A2BE28	A2BE28	F:\Yifan\20230908_singletubule_raw\230901_st_93_B9.raw		Control_1
Las1l	A2BE28	A2BE28	F:\Yifan\20230908_singletubule_raw\230901_st_93_D8.raw		Control_1
Las1l	A2BE28	A2BE28	F:\Yifan\20230908_singletubule_raw\230901_st_93_B1.raw		Control_1
Las1l	A2BE28	A2BE28	F:\Yifan\20230908_singletubule_raw\230901_st_93_A12.raw		Control_1
Las1l	A2BE28	A2BE28	F:\Yifan\20230908_singletubule_raw\230901_st_93_C1.raw		Control_1
Las1l	A2BE28	A2BE28	F:\Yifan\20230908_singletubule_raw\230901_st_93_E10.raw		Control_1
Las1l	A2BE28	A2BE28	F:\Yifan\20230908_singletubule_raw\230901_st_93_E2.raw		Control_1
Las1l	A2BE28	A2BE28	F:\Yifan\20230908_singletubule_raw\230901_st_93_H7.raw		Control_1
Las1l	A2BE28	A2BE28	F:\Yifan\20230908_singletubule_raw\230901_st_93_F4.raw		Control_1
Las1l	A2BE28	A2BE28	F:\Yifan\20230908_singletubule_raw\230901_st_93_H8.raw		Control_1
Las1l	A2BE28	A2BE28	F:\Yifan\20230908_singletubule_raw\230901_st_93_D11.raw		Control_1
Las1l	A2BE28	A2BE28	F:\Yifan\20230908_singletubule_raw\230901_st_93_C3.raw		Control_1
Las1l	A2BE28	A2BE28	F:\Yifan\20230908_singletubule_raw\230901_st_93_D9.raw		Control_1
Las1l	A2BE28	A2BE28	F:\Yifan\20230908_singletubule_raw\230901_st_93_F11.raw		Control_1
Las1l	A2BE28	A2BE28	F:\Yifan\20230908_singletubule_raw\230901_st_93_B7.raw		Control_1
Las1l	A2BE28	A2BE28	F:\Yifan\20230908_singletubule_raw\230901_st_93_F8.raw		Control_1
Las1l	A2BE28	A2BE28	F:\Yifan\20230908_singletubule_raw\230901_st_93_C8.raw		Control_1
Las1l	A2BE28	A2BE28	F:\Yifan\20230908_singletubule_raw\230901_st_93_A8.raw		Control_1
Las1l	A2BE28	A2BE28	F:\Yifan\20230908_singletubule_raw\230901_st_93_G3.raw		Control_1
Las1l	A2BE28	A2BE28	F:\Yifan\20230908_singletubule_raw\230901_st_93_E1.raw		Control_1
Las1l	A2BE28	A2BE28	F:\Yifan\20230908_singletubule_raw\230901_st_93_C2.raw		Control_1
Las1l	A2BE28	A2BE28	F:\Yifan\20230908_singletubule_raw\230901_st_93_B3.raw		Control_1
Las1l	A2BE28	A2BE28	F:\Yifan\20230908_singletubule_raw\230901_st_93_A7.raw		Control_1
Las1l	A2BE28	A2BE28	F:\Yifan\20230908_singletubule_raw\230901_st_93_G6.raw		Control_1
Las1l	A2BE28	A2BE28	F:\Yifan\20230908_singletubule_raw\230901_st_93_D7.raw		Control_1
Las1l	A2BE28	A2BE28	F:\Yifan\20230908_singletubule_raw\230901_st_93_G1.raw		Control_1
Las1l	A2BE28	A2BE28	F:\Yifan\20230908_singletubule_raw\230901_st_93_H6.raw		Control_1
Las1l	A2BE28	A2BE28	F:\Yifan\20230908_singletubule_raw\230901_st_93_A4.raw		Control_1
Las1l	A2BE28	A2BE28	F:\Yifan\20230908_singletubule_raw\230901_st_93_B8.raw		Control_1
Las1l	A2BE28	A2BE28	F:\Yifan\20230908_singletubule_raw\230901_st_93_A3.raw		Control_1
Las1l	A2BE28	A2BE28	F:\Yifan\20230908_singletubule_raw\230901_st_93_A1.raw		Control_1
Las1l	A2BE28	A2BE28	F:\Yifan\20230908_singletubule_raw\230901_st_93_A2.raw		Control_1
Las1l	A2BE28	A2BE28	F:\Yifan\20230908_singletubule_raw\230901_st_93_A6.raw		Control_1
Mup18	A2BIM8	A2BIM8	F:\Yifan\20230908_singletubule_raw\230901_st_93_E8.raw	195347	Control_1
Mup18	A2BIM8	A2BIM8	F:\Yifan\20230908_singletubule_raw\230901_st_93_G10.raw	289666	Control_1
Mup18	A2BIM8	A2BIM8	F:\Yifan\20230908_singletubule_raw\230901_st_93_G11.raw	70936.7	Control_1
Mup18	A2BIM8	A2BIM8	F:\Yifan\20230908_singletubule_raw\230901_st_93_H10.raw	115367	Control_1
Mup18	A2BIM8	A2BIM8	F:\Yifan\20230908_singletubule_raw\230901_st_93_H12.raw	70045.8	Control_1
Mup18	A2BIM8	A2BIM8	F:\Yifan\20230908_singletubule_raw\230901_st_93_H3.raw	110206	Control_1
Mup18	A2BIM8	A2BIM8	F:\Yifan\20230908_singletubule_raw\230901_st_93_B6.raw	172548	Control_1
Mup18	A2BIM8	A2BIM8	F:\Yifan\20230908_singletubule_raw\230901_st_93_H11.raw	186097	Control_1
Mup18	A2BIM8	A2BIM8	F:\Yifan\20230908_singletubule_raw\230901_st_93_E6.raw	349643	Control_1
Mup18	A2BIM8	A2BIM8	F:\Yifan\20230908_singletubule_raw\230901_st_93_E7.raw	224237	Control_1
Mup18	A2BIM8	A2BIM8	F:\Yifan\20230908_singletubule_raw\230901_st_93_G9.raw	91957.9	Control_1
Mup18	A2BIM8	A2BIM8	F:\Yifan\20230908_singletubule_raw\230901_st_93_F10.raw	78173.5	Control_1
Mup18	A2BIM8	A2BIM8	F:\Yifan\20230908_singletubule_raw\230901_st_93_E9.raw	52430.2	Control_1
Mup18	A2BIM8	A2BIM8	F:\Yifan\20230908_singletubule_raw\230901_st_93_D10.raw	109112	Control_1
Mup18	A2BIM8	A2BIM8	F:\Yifan\20230908_singletubule_raw\230901_st_93_F9.raw	112603	Control_1
Mup18	A2BIM8	A2BIM8	F:\Yifan\20230908_singletubule_raw\230901_st_93_G7.raw	340860	Control_1
Mup18	A2BIM8	A2BIM8	F:\Yifan\20230908_singletubule_raw\230901_st_93_A9.raw	175219	Control_1
Mup18	A2BIM8	A2BIM8	F:\Yifan\20230908_singletubule_raw\230901_st_93_E3.raw	139419	Control_1
Mup18	A2BIM8	A2BIM8	F:\Yifan\20230908_singletubule_raw\230901_st_93_C7.raw	93496.5	Control_1
Mup18	A2BIM8	A2BIM8	F:\Yifan\20230908_singletubule_raw\230901_st_93_G4.raw	70220.4	Control_1
Mup18	A2BIM8	A2BIM8	F:\Yifan\20230908_singletubule_raw\230901_st_93_D3.raw	184279	Control_1
Mup18	A2BIM8	A2BIM8	F:\Yifan\20230908_singletubule_raw\230901_st_93_F2.raw	705560	Control_1
Mup18	A2BIM8	A2BIM8	F:\Yifan\20230908_singletubule_raw\230901_st_93_G8.raw	177458	Control_1
Mup18	A2BIM8	A2BIM8	F:\Yifan\20230908_singletubule_raw\230901_st_93_H4.raw	39181.2	Control_1
Mup18	A2BIM8	A2BIM8	F:\Yifan\20230908_singletubule_raw\230901_st_93_D6.raw	204087	Control_1
Mup18	A2BIM8	A2BIM8	F:\Yifan\20230908_singletubule_raw\230901_st_93_D4.raw	109343	Control_1
Mup18	A2BIM8	A2BIM8	F:\Yifan\20230908_singletubule_raw\230901_st_93_F12.raw	159864	Control_1
Mup18	A2BIM8	A2BIM8	F:\Yifan\20230908_singletubule_raw\230901_st_93_C9.raw	174740	Control_1
Mup18	A2BIM8	A2BIM8	F:\Yifan\20230908_singletubule_raw\230901_st_93_G12.raw	221143	Control_1
Mup18	A2BIM8	A2BIM8	F:\Yifan\20230908_singletubule_raw\230901_st_93_B10.raw	90723.8	Control_1
Mup18	A2BIM8	A2BIM8	F:\Yifan\20230908_singletubule_raw\230901_st_93_B11.raw	77374.1	Control_1
Mup18	A2BIM8	A2BIM8	F:\Yifan\20230908_singletubule_raw\230901_st_93_E11.raw	138912	Control_1
Mup18	A2BIM8	A2BIM8	F:\Yifan\20230908_singletubule_raw\230901_st_93_B12.raw	30541.9	Control_1
Mup18	A2BIM8	A2BIM8	F:\Yifan\20230908_singletubule_raw\230901_st_93_F3.raw	350479	Control_1
Mup18	A2BIM8	A2BIM8	F:\Yifan\20230908_singletubule_raw\230901_st_93_B4.raw	169251	Control_1
Mup18	A2BIM8	A2BIM8	F:\Yifan\20230908_singletubule_raw\230901_st_93_C11.raw	191445	Control_1
Mup18	A2BIM8	A2BIM8	F:\Yifan\20230908_singletubule_raw\230901_st_93_B2.raw	103912	Control_1
Mup18	A2BIM8	A2BIM8	F:\Yifan\20230908_singletubule_raw\230901_st_93_H9.raw	666281	Control_1
Mup18	A2BIM8	A2BIM8	F:\Yifan\20230908_singletubule_raw\230901_st_93_F1.raw	168803	Control_1
Mup18	A2BIM8	A2BIM8	F:\Yifan\20230908_singletubule_raw\230901_st_93_C12.raw	68764.6	Control_1
Mup18	A2BIM8	A2BIM8	F:\Yifan\20230908_singletubule_raw\230901_st_93_D2.raw	103523	Control_1
Mup18	A2BIM8	A2BIM8	F:\Yifan\20230908_singletubule_raw\230901_st_93_H2.raw	148125	Control_1
Mup18	A2BIM8	A2BIM8	F:\Yifan\20230908_singletubule_raw\230901_st_93_A11.raw	179366	Control_1
Mup18	A2BIM8	A2BIM8	F:\Yifan\20230908_singletubule_raw\230901_st_93_D1.raw	133809	Control_1
Mup18	A2BIM8	A2BIM8	F:\Yifan\20230908_singletubule_raw\230901_st_93_F7.raw	53233.3	Control_1
Mup18	A2BIM8	A2BIM8	F:\Yifan\20230908_singletubule_raw\230901_st_93_E4.raw	104474	Control_1
Mup18	A2BIM8	A2BIM8	F:\Yifan\20230908_singletubule_raw\230901_st_93_F6.raw	122400	Control_1
Mup18	A2BIM8	A2BIM8	F:\Yifan\20230908_singletubule_raw\230901_st_93_G2.raw	119618	Control_1
Mup18	A2BIM8	A2BIM8	F:\Yifan\20230908_singletubule_raw\230901_st_93_C10.raw	236505	Control_1
Mup18	A2BIM8	A2BIM8	F:\Yifan\20230908_singletubule_raw\230901_st_93_E12.raw	116890	Control_1
Mup18	A2BIM8	A2BIM8	F:\Yifan\20230908_singletubule_raw\230901_st_93_D12.raw	166583	Control_1
Mup18	A2BIM8	A2BIM8	F:\Yifan\20230908_singletubule_raw\230901_st_93_H1.raw	131604	Control_1
Mup18	A2BIM8	A2BIM8	F:\Yifan\20230908_singletubule_raw\230901_st_93_C4.raw	59616.6	Control_1
Mup18	A2BIM8	A2BIM8	F:\Yifan\20230908_singletubule_raw\230901_st_93_A10.raw	98796.6	Control_1
Mup18	A2BIM8	A2BIM8	F:\Yifan\20230908_singletubule_raw\230901_st_93_B9.raw	282963	Control_1
Mup18	A2BIM8	A2BIM8	F:\Yifan\20230908_singletubule_raw\230901_st_93_D8.raw	207763	Control_1
Mup18	A2BIM8	A2BIM8	F:\Yifan\20230908_singletubule_raw\230901_st_93_B1.raw	53457	Control_1
Mup18	A2BIM8	A2BIM8	F:\Yifan\20230908_singletubule_raw\230901_st_93_A12.raw	496770	Control_1
Mup18	A2BIM8	A2BIM8	F:\Yifan\20230908_singletubule_raw\230901_st_93_C1.raw	239280	Control_1
Mup18	A2BIM8	A2BIM8	F:\Yifan\20230908_singletubule_raw\230901_st_93_E10.raw	154659	Control_1
Mup18	A2BIM8	A2BIM8	F:\Yifan\20230908_singletubule_raw\230901_st_93_E2.raw	58135.4	Control_1
Mup18	A2BIM8	A2BIM8	F:\Yifan\20230908_singletubule_raw\230901_st_93_H7.raw	40753.9	Control_1
Mup18	A2BIM8	A2BIM8	F:\Yifan\20230908_singletubule_raw\230901_st_93_F4.raw	185638	Control_1
Mup18	A2BIM8	A2BIM8	F:\Yifan\20230908_singletubule_raw\230901_st_93_H8.raw	309995	Control_1
Mup18	A2BIM8	A2BIM8	F:\Yifan\20230908_singletubule_raw\230901_st_93_D11.raw	168683	Control_1
Mup18	A2BIM8	A2BIM8	F:\Yifan\20230908_singletubule_raw\230901_st_93_C3.raw	83874.7	Control_1
Mup18	A2BIM8	A2BIM8	F:\Yifan\20230908_singletubule_raw\230901_st_93_D9.raw	141406	Control_1
Mup18	A2BIM8	A2BIM8	F:\Yifan\20230908_singletubule_raw\230901_st_93_F11.raw	258927	Control_1
Mup18	A2BIM8	A2BIM8	F:\Yifan\20230908_singletubule_raw\230901_st_93_B7.raw	26370.1	Control_1
Mup18	A2BIM8	A2BIM8	F:\Yifan\20230908_singletubule_raw\230901_st_93_F8.raw	291702	Control_1
Mup18	A2BIM8	A2BIM8	F:\Yifan\20230908_singletubule_raw\230901_st_93_C8.raw	57859.5	Control_1
Mup18	A2BIM8	A2BIM8	F:\Yifan\20230908_singletubule_raw\230901_st_93_A8.raw	111467	Control_1
Mup18	A2BIM8	A2BIM8	F:\Yifan\20230908_singletubule_raw\230901_st_93_G3.raw		Control_1
Mup18	A2BIM8	A2BIM8	F:\Yifan\20230908_singletubule_raw\230901_st_93_E1.raw	270956	Control_1
Mup18	A2BIM8	A2BIM8	F:\Yifan\20230908_singletubule_raw\230901_st_93_C2.raw	159810	Control_1
Mup18	A2BIM8	A2BIM8	F:\Yifan\20230908_singletubule_raw\230901_st_93_B3.raw	333081	Control_1
Mup18	A2BIM8	A2BIM8	F:\Yifan\20230908_singletubule_raw\230901_st_93_A7.raw	124174	Control_1
Mup18	A2BIM8	A2BIM8	F:\Yifan\20230908_singletubule_raw\230901_st_93_G6.raw	1537230	Control_1
Mup18	A2BIM8	A2BIM8	F:\Yifan\20230908_singletubule_raw\230901_st_93_D7.raw		Control_1
Mup18	A2BIM8	A2BIM8	F:\Yifan\20230908_singletubule_raw\230901_st_93_G1.raw	296590	Control_1
Mup18	A2BIM8	A2BIM8	F:\Yifan\20230908_singletubule_raw\230901_st_93_H6.raw	87404.5	Control_1
Mup18	A2BIM8	A2BIM8	F:\Yifan\20230908_singletubule_raw\230901_st_93_A4.raw		Control_1
Mup18	A2BIM8	A2BIM8	F:\Yifan\20230908_singletubule_raw\230901_st_93_B8.raw		Control_1
Mup18	A2BIM8	A2BIM8	F:\Yifan\20230908_singletubule_raw\230901_st_93_A3.raw	330651	Control_1
Mup18	A2BIM8	A2BIM8	F:\Yifan\20230908_singletubule_raw\230901_st_93_A1.raw	1254690	Control_1
Mup18	A2BIM8	A2BIM8	F:\Yifan\20230908_singletubule_raw\230901_st_93_A2.raw		Control_1
Mup18	A2BIM8	A2BIM8	F:\Yifan\20230908_singletubule_raw\230901_st_93_A6.raw		Control_1
Tyw5	A2RSX7	A2RSX7	F:\Yifan\20230908_singletubule_raw\230901_st_93_E8.raw	4680.69	Control_1
Tyw5	A2RSX7	A2RSX7	F:\Yifan\20230908_singletubule_raw\230901_st_93_G10.raw	2192.89	Control_1
Tyw5	A2RSX7	A2RSX7	F:\Yifan\20230908_singletubule_raw\230901_st_93_G11.raw	3239.94	Control_1
Tyw5	A2RSX7	A2RSX7	F:\Yifan\20230908_singletubule_raw\230901_st_93_H10.raw	2568.4	Control_1
Tyw5	A2RSX7	A2RSX7	F:\Yifan\20230908_singletubule_raw\230901_st_93_H12.raw	619.944	Control_1
Tyw5	A2RSX7	A2RSX7	F:\Yifan\20230908_singletubule_raw\230901_st_93_H3.raw	3292.21	Control_1
Tyw5	A2RSX7	A2RSX7	F:\Yifan\20230908_singletubule_raw\230901_st_93_B6.raw	4038.95	Control_1
Tyw5	A2RSX7	A2RSX7	F:\Yifan\20230908_singletubule_raw\230901_st_93_H11.raw	4695.76	Control_1
Tyw5	A2RSX7	A2RSX7	F:\Yifan\20230908_singletubule_raw\230901_st_93_E6.raw	4435.25	Control_1
Tyw5	A2RSX7	A2RSX7	F:\Yifan\20230908_singletubule_raw\230901_st_93_E7.raw		Control_1
Tyw5	A2RSX7	A2RSX7	F:\Yifan\20230908_singletubule_raw\230901_st_93_G9.raw	4936.05	Control_1
Tyw5	A2RSX7	A2RSX7	F:\Yifan\20230908_singletubule_raw\230901_st_93_F10.raw	3188.91	Control_1
Tyw5	A2RSX7	A2RSX7	F:\Yifan\20230908_singletubule_raw\230901_st_93_E9.raw	4869.28	Control_1
Tyw5	A2RSX7	A2RSX7	F:\Yifan\20230908_singletubule_raw\230901_st_93_D10.raw		Control_1
Tyw5	A2RSX7	A2RSX7	F:\Yifan\20230908_singletubule_raw\230901_st_93_F9.raw	3584.43	Control_1
Tyw5	A2RSX7	A2RSX7	F:\Yifan\20230908_singletubule_raw\230901_st_93_G7.raw	2545.51	Control_1
Tyw5	A2RSX7	A2RSX7	F:\Yifan\20230908_singletubule_raw\230901_st_93_A9.raw		Control_1
Tyw5	A2RSX7	A2RSX7	F:\Yifan\20230908_singletubule_raw\230901_st_93_E3.raw	6785.81	Control_1
Tyw5	A2RSX7	A2RSX7	F:\Yifan\20230908_singletubule_raw\230901_st_93_C7.raw		Control_1
Tyw5	A2RSX7	A2RSX7	F:\Yifan\20230908_singletubule_raw\230901_st_93_G4.raw	3132	Control_1
Tyw5	A2RSX7	A2RSX7	F:\Yifan\20230908_singletubule_raw\230901_st_93_D3.raw		Control_1
Tyw5	A2RSX7	A2RSX7	F:\Yifan\20230908_singletubule_raw\230901_st_93_F2.raw		Control_1
Tyw5	A2RSX7	A2RSX7	F:\Yifan\20230908_singletubule_raw\230901_st_93_G8.raw		Control_1
Tyw5	A2RSX7	A2RSX7	F:\Yifan\20230908_singletubule_raw\230901_st_93_H4.raw	1742.69	Control_1
Tyw5	A2RSX7	A2RSX7	F:\Yifan\20230908_singletubule_raw\230901_st_93_D6.raw		Control_1
Tyw5	A2RSX7	A2RSX7	F:\Yifan\20230908_singletubule_raw\230901_st_93_D4.raw		Control_1
Tyw5	A2RSX7	A2RSX7	F:\Yifan\20230908_singletubule_raw\230901_st_93_F12.raw		Control_1
Tyw5	A2RSX7	A2RSX7	F:\Yifan\20230908_singletubule_raw\230901_st_93_C9.raw		Control_1
Tyw5	A2RSX7	A2RSX7	F:\Yifan\20230908_singletubule_raw\230901_st_93_G12.raw		Control_1
Tyw5	A2RSX7	A2RSX7	F:\Yifan\20230908_singletubule_raw\230901_st_93_B10.raw		Control_1
Tyw5	A2RSX7	A2RSX7	F:\Yifan\20230908_singletubule_raw\230901_st_93_B11.raw	3589.76	Control_1
Tyw5	A2RSX7	A2RSX7	F:\Yifan\20230908_singletubule_raw\230901_st_93_E11.raw	2067.34	Control_1
Tyw5	A2RSX7	A2RSX7	F:\Yifan\20230908_singletubule_raw\230901_st_93_B12.raw	2394.91	Control_1
Tyw5	A2RSX7	A2RSX7	F:\Yifan\20230908_singletubule_raw\230901_st_93_F3.raw		Control_1
Tyw5	A2RSX7	A2RSX7	F:\Yifan\20230908_singletubule_raw\230901_st_93_B4.raw		Control_1
Tyw5	A2RSX7	A2RSX7	F:\Yifan\20230908_singletubule_raw\230901_st_93_C11.raw		Control_1
Tyw5	A2RSX7	A2RSX7	F:\Yifan\20230908_singletubule_raw\230901_st_93_B2.raw		Control_1
Tyw5	A2RSX7	A2RSX7	F:\Yifan\20230908_singletubule_raw\230901_st_93_H9.raw		Control_1
Tyw5	A2RSX7	A2RSX7	F:\Yifan\20230908_singletubule_raw\230901_st_93_F1.raw	6869.65	Control_1
Tyw5	A2RSX7	A2RSX7	F:\Yifan\20230908_singletubule_raw\230901_st_93_C12.raw		Control_1
Tyw5	A2RSX7	A2RSX7	F:\Yifan\20230908_singletubule_raw\230901_st_93_D2.raw		Control_1
Tyw5	A2RSX7	A2RSX7	F:\Yifan\20230908_singletubule_raw\230901_st_93_H2.raw		Control_1
Tyw5	A2RSX7	A2RSX7	F:\Yifan\20230908_singletubule_raw\230901_st_93_A11.raw		Control_1
Tyw5	A2RSX7	A2RSX7	F:\Yifan\20230908_singletubule_raw\230901_st_93_D1.raw		Control_1
Tyw5	A2RSX7	A2RSX7	F:\Yifan\20230908_singletubule_raw\230901_st_93_F7.raw		Control_1
Tyw5	A2RSX7	A2RSX7	F:\Yifan\20230908_singletubule_raw\230901_st_93_E4.raw		Control_1
Tyw5	A2RSX7	A2RSX7	F:\Yifan\20230908_singletubule_raw\230901_st_93_F6.raw		Control_1
Tyw5	A2RSX7	A2RSX7	F:\Yifan\20230908_singletubule_raw\230901_st_93_G2.raw		Control_1
Tyw5	A2RSX7	A2RSX7	F:\Yifan\20230908_singletubule_raw\230901_st_93_C10.raw		Control_1
Tyw5	A2RSX7	A2RSX7	F:\Yifan\20230908_singletubule_raw\230901_st_93_E12.raw		Control_1
Tyw5	A2RSX7	A2RSX7	F:\Yifan\20230908_singletubule_raw\230901_st_93_D12.raw		Control_1
Tyw5	A2RSX7	A2RSX7	F:\Yifan\20230908_singletubule_raw\230901_st_93_H1.raw		Control_1
Tyw5	A2RSX7	A2RSX7	F:\Yifan\20230908_singletubule_raw\230901_st_93_C4.raw		Control_1
Tyw5	A2RSX7	A2RSX7	F:\Yifan\20230908_singletubule_raw\230901_st_93_A10.raw		Control_1
Tyw5	A2RSX7	A2RSX7	F:\Yifan\20230908_singletubule_raw\230901_st_93_B9.raw		Control_1
Tyw5	A2RSX7	A2RSX7	F:\Yifan\20230908_singletubule_raw\230901_st_93_D8.raw		Control_1
Tyw5	A2RSX7	A2RSX7	F:\Yifan\20230908_singletubule_raw\230901_st_93_B1.raw		Control_1
Tyw5	A2RSX7	A2RSX7	F:\Yifan\20230908_singletubule_raw\230901_st_93_A12.raw		Control_1
Tyw5	A2RSX7	A2RSX7	F:\Yifan\20230908_singletubule_raw\230901_st_93_C1.raw		Control_1
Tyw5	A2RSX7	A2RSX7	F:\Yifan\20230908_singletubule_raw\230901_st_93_E10.raw		Control_1
Tyw5	A2RSX7	A2RSX7	F:\Yifan\20230908_singletubule_raw\230901_st_93_E2.raw		Control_1
Tyw5	A2RSX7	A2RSX7	F:\Yifan\20230908_singletubule_raw\230901_st_93_H7.raw		Control_1
Tyw5	A2RSX7	A2RSX7	F:\Yifan\20230908_singletubule_raw\230901_st_93_F4.raw		Control_1
Tyw5	A2RSX7	A2RSX7	F:\Yifan\20230908_singletubule_raw\230901_st_93_H8.raw		Control_1
Tyw5	A2RSX7	A2RSX7	F:\Yifan\20230908_singletubule_raw\230901_st_93_D11.raw		Control_1
Tyw5	A2RSX7	A2RSX7	F:\Yifan\20230908_singletubule_raw\230901_st_93_C3.raw		Control_1
Tyw5	A2RSX7	A2RSX7	F:\Yifan\20230908_singletubule_raw\230901_st_93_D9.raw		Control_1
Tyw5	A2RSX7	A2RSX7	F:\Yifan\20230908_singletubule_raw\230901_st_93_F11.raw		Control_1
Tyw5	A2RSX7	A2RSX7	F:\Yifan\20230908_singletubule_raw\230901_st_93_B7.raw		Control_1
Tyw5	A2RSX7	A2RSX7	F:\Yifan\20230908_singletubule_raw\230901_st_93_F8.raw		Control_1
Tyw5	A2RSX7	A2RSX7	F:\Yifan\20230908_singletubule_raw\230901_st_93_C8.raw		Control_1
Tyw5	A2RSX7	A2RSX7	F:\Yifan\20230908_singletubule_raw\230901_st_93_A8.raw		Control_1
Tyw5	A2RSX7	A2RSX7	F:\Yifan\20230908_singletubule_raw\230901_st_93_G3.raw		Control_1
Tyw5	A2RSX7	A2RSX7	F:\Yifan\20230908_singletubule_raw\230901_st_93_E1.raw		Control_1
Tyw5	A2RSX7	A2RSX7	F:\Yifan\20230908_singletubule_raw\230901_st_93_C2.raw		Control_1
Tyw5	A2RSX7	A2RSX7	F:\Yifan\20230908_singletubule_raw\230901_st_93_B3.raw		Control_1
Tyw5	A2RSX7	A2RSX7	F:\Yifan\20230908_singletubule_raw\230901_st_93_A7.raw		Control_1
Tyw5	A2RSX7	A2RSX7	F:\Yifan\20230908_singletubule_raw\230901_st_93_G6.raw		Control_1
Tyw5	A2RSX7	A2RSX7	F:\Yifan\20230908_singletubule_raw\230901_st_93_D7.raw		Control_1
Tyw5	A2RSX7	A2RSX7	F:\Yifan\20230908_singletubule_raw\230901_st_93_G1.raw		Control_1
Tyw5	A2RSX7	A2RSX7	F:\Yifan\20230908_singletubule_raw\230901_st_93_H6.raw		Control_1
Tyw5	A2RSX7	A2RSX7	F:\Yifan\20230908_singletubule_raw\230901_st_93_A4.raw		Control_1
Tyw5	A2RSX7	A2RSX7	F:\Yifan\20230908_singletubule_raw\230901_st_93_B8.raw		Control_1
Tyw5	A2RSX7	A2RSX7	F:\Yifan\20230908_singletubule_raw\230901_st_93_A3.raw		Control_1
Tyw5	A2RSX7	A2RSX7	F:\Yifan\20230908_singletubule_raw\230901_st_93_A1.raw		Control_1
Tyw5	A2RSX7	A2RSX7	F:\Yifan\20230908_singletubule_raw\230901_st_93_A2.raw		Control_1
Tyw5	A2RSX7	A2RSX7	F:\Yifan\20230908_singletubule_raw\230901_st_93_A6.raw		Control_1
Palm3	A2TJV2	A2TJV2	F:\Yifan\20230908_singletubule_raw\230901_st_93_E8.raw	3740.27	Control_1
Palm3	A2TJV2	A2TJV2	F:\Yifan\20230908_singletubule_raw\230901_st_93_G10.raw		Control_1
Palm3	A2TJV2	A2TJV2	F:\Yifan\20230908_singletubule_raw\230901_st_93_G11.raw	3023.86	Control_1
Palm3	A2TJV2	A2TJV2	F:\Yifan\20230908_singletubule_raw\230901_st_93_H10.raw	4242.46	Control_1
Palm3	A2TJV2	A2TJV2	F:\Yifan\20230908_singletubule_raw\230901_st_93_H12.raw	11162	Control_1
Palm3	A2TJV2	A2TJV2	F:\Yifan\20230908_singletubule_raw\230901_st_93_H3.raw		Control_1
Palm3	A2TJV2	A2TJV2	F:\Yifan\20230908_singletubule_raw\230901_st_93_B6.raw	12289.5	Control_1
Palm3	A2TJV2	A2TJV2	F:\Yifan\20230908_singletubule_raw\230901_st_93_H11.raw		Control_1
Palm3	A2TJV2	A2TJV2	F:\Yifan\20230908_singletubule_raw\230901_st_93_E6.raw	7816.29	Control_1
Palm3	A2TJV2	A2TJV2	F:\Yifan\20230908_singletubule_raw\230901_st_93_E7.raw		Control_1
Palm3	A2TJV2	A2TJV2	F:\Yifan\20230908_singletubule_raw\230901_st_93_G9.raw	8665.06	Control_1
Palm3	A2TJV2	A2TJV2	F:\Yifan\20230908_singletubule_raw\230901_st_93_F10.raw		Control_1
Palm3	A2TJV2	A2TJV2	F:\Yifan\20230908_singletubule_raw\230901_st_93_E9.raw		Control_1
Palm3	A2TJV2	A2TJV2	F:\Yifan\20230908_singletubule_raw\230901_st_93_D10.raw		Control_1
Palm3	A2TJV2	A2TJV2	F:\Yifan\20230908_singletubule_raw\230901_st_93_F9.raw		Control_1
Palm3	A2TJV2	A2TJV2	F:\Yifan\20230908_singletubule_raw\230901_st_93_G7.raw	5139.27	Control_1
Palm3	A2TJV2	A2TJV2	F:\Yifan\20230908_singletubule_raw\230901_st_93_A9.raw	11019.8	Control_1
Palm3	A2TJV2	A2TJV2	F:\Yifan\20230908_singletubule_raw\230901_st_93_E3.raw	7997.47	Control_1
Palm3	A2TJV2	A2TJV2	F:\Yifan\20230908_singletubule_raw\230901_st_93_C7.raw	3106.08	Control_1
Palm3	A2TJV2	A2TJV2	F:\Yifan\20230908_singletubule_raw\230901_st_93_G4.raw		Control_1
Palm3	A2TJV2	A2TJV2	F:\Yifan\20230908_singletubule_raw\230901_st_93_D3.raw	14626.7	Control_1
Palm3	A2TJV2	A2TJV2	F:\Yifan\20230908_singletubule_raw\230901_st_93_F2.raw	11405.9	Control_1
Palm3	A2TJV2	A2TJV2	F:\Yifan\20230908_singletubule_raw\230901_st_93_G8.raw	14930.9	Control_1
Palm3	A2TJV2	A2TJV2	F:\Yifan\20230908_singletubule_raw\230901_st_93_H4.raw		Control_1
Palm3	A2TJV2	A2TJV2	F:\Yifan\20230908_singletubule_raw\230901_st_93_D6.raw	18239.1	Control_1
Palm3	A2TJV2	A2TJV2	F:\Yifan\20230908_singletubule_raw\230901_st_93_D4.raw	25343	Control_1
Palm3	A2TJV2	A2TJV2	F:\Yifan\20230908_singletubule_raw\230901_st_93_F12.raw	7597.18	Control_1
Palm3	A2TJV2	A2TJV2	F:\Yifan\20230908_singletubule_raw\230901_st_93_C9.raw	10348.7	Control_1
Palm3	A2TJV2	A2TJV2	F:\Yifan\20230908_singletubule_raw\230901_st_93_G12.raw		Control_1
Palm3	A2TJV2	A2TJV2	F:\Yifan\20230908_singletubule_raw\230901_st_93_B10.raw	9094.01	Control_1
Palm3	A2TJV2	A2TJV2	F:\Yifan\20230908_singletubule_raw\230901_st_93_B11.raw		Control_1
Palm3	A2TJV2	A2TJV2	F:\Yifan\20230908_singletubule_raw\230901_st_93_E11.raw		Control_1
Palm3	A2TJV2	A2TJV2	F:\Yifan\20230908_singletubule_raw\230901_st_93_B12.raw		Control_1
Palm3	A2TJV2	A2TJV2	F:\Yifan\20230908_singletubule_raw\230901_st_93_F3.raw		Control_1
Palm3	A2TJV2	A2TJV2	F:\Yifan\20230908_singletubule_raw\230901_st_93_B4.raw	6583.75	Control_1
Palm3	A2TJV2	A2TJV2	F:\Yifan\20230908_singletubule_raw\230901_st_93_C11.raw		Control_1
Palm3	A2TJV2	A2TJV2	F:\Yifan\20230908_singletubule_raw\230901_st_93_B2.raw	6469.35	Control_1
Palm3	A2TJV2	A2TJV2	F:\Yifan\20230908_singletubule_raw\230901_st_93_H9.raw		Control_1
Palm3	A2TJV2	A2TJV2	F:\Yifan\20230908_singletubule_raw\230901_st_93_F1.raw		Control_1
Palm3	A2TJV2	A2TJV2	F:\Yifan\20230908_singletubule_raw\230901_st_93_C12.raw		Control_1
Palm3	A2TJV2	A2TJV2	F:\Yifan\20230908_singletubule_raw\230901_st_93_D2.raw		Control_1
Palm3	A2TJV2	A2TJV2	F:\Yifan\20230908_singletubule_raw\230901_st_93_H2.raw	18004.4	Control_1
Palm3	A2TJV2	A2TJV2	F:\Yifan\20230908_singletubule_raw\230901_st_93_A11.raw	11174	Control_1
Palm3	A2TJV2	A2TJV2	F:\Yifan\20230908_singletubule_raw\230901_st_93_D1.raw	6976.87	Control_1
Palm3	A2TJV2	A2TJV2	F:\Yifan\20230908_singletubule_raw\230901_st_93_F7.raw	8512.6	Control_1
Palm3	A2TJV2	A2TJV2	F:\Yifan\20230908_singletubule_raw\230901_st_93_E4.raw		Control_1
Palm3	A2TJV2	A2TJV2	F:\Yifan\20230908_singletubule_raw\230901_st_93_F6.raw		Control_1
Palm3	A2TJV2	A2TJV2	F:\Yifan\20230908_singletubule_raw\230901_st_93_G2.raw	12184.2	Control_1
Palm3	A2TJV2	A2TJV2	F:\Yifan\20230908_singletubule_raw\230901_st_93_C10.raw		Control_1
Palm3	A2TJV2	A2TJV2	F:\Yifan\20230908_singletubule_raw\230901_st_93_E12.raw	6616.53	Control_1
Palm3	A2TJV2	A2TJV2	F:\Yifan\20230908_singletubule_raw\230901_st_93_D12.raw	8359.37	Control_1
Palm3	A2TJV2	A2TJV2	F:\Yifan\20230908_singletubule_raw\230901_st_93_H1.raw		Control_1
Palm3	A2TJV2	A2TJV2	F:\Yifan\20230908_singletubule_raw\230901_st_93_C4.raw	29473.3	Control_1
Palm3	A2TJV2	A2TJV2	F:\Yifan\20230908_singletubule_raw\230901_st_93_A10.raw	13749.1	Control_1
Palm3	A2TJV2	A2TJV2	F:\Yifan\20230908_singletubule_raw\230901_st_93_B9.raw		Control_1
Palm3	A2TJV2	A2TJV2	F:\Yifan\20230908_singletubule_raw\230901_st_93_D8.raw	15692.3	Control_1
Palm3	A2TJV2	A2TJV2	F:\Yifan\20230908_singletubule_raw\230901_st_93_B1.raw		Control_1
Palm3	A2TJV2	A2TJV2	F:\Yifan\20230908_singletubule_raw\230901_st_93_A12.raw		Control_1
Palm3	A2TJV2	A2TJV2	F:\Yifan\20230908_singletubule_raw\230901_st_93_C1.raw		Control_1
Palm3	A2TJV2	A2TJV2	F:\Yifan\20230908_singletubule_raw\230901_st_93_E10.raw		Control_1
Palm3	A2TJV2	A2TJV2	F:\Yifan\20230908_singletubule_raw\230901_st_93_E2.raw		Control_1
Palm3	A2TJV2	A2TJV2	F:\Yifan\20230908_singletubule_raw\230901_st_93_H7.raw		Control_1
Palm3	A2TJV2	A2TJV2	F:\Yifan\20230908_singletubule_raw\230901_st_93_F4.raw		Control_1
Palm3	A2TJV2	A2TJV2	F:\Yifan\20230908_singletubule_raw\230901_st_93_H8.raw		Control_1
Palm3	A2TJV2	A2TJV2	F:\Yifan\20230908_singletubule_raw\230901_st_93_D11.raw		Control_1
Palm3	A2TJV2	A2TJV2	F:\Yifan\20230908_singletubule_raw\230901_st_93_C3.raw		Control_1
Palm3	A2TJV2	A2TJV2	F:\Yifan\20230908_singletubule_raw\230901_st_93_D9.raw		Control_1
Palm3	A2TJV2	A2TJV2	F:\Yifan\20230908_singletubule_raw\230901_st_93_F11.raw		Control_1
Palm3	A2TJV2	A2TJV2	F:\Yifan\20230908_singletubule_raw\230901_st_93_B7.raw		Control_1
Palm3	A2TJV2	A2TJV2	F:\Yifan\20230908_singletubule_raw\230901_st_93_F8.raw		Control_1
Palm3	A2TJV2	A2TJV2	F:\Yifan\20230908_singletubule_raw\230901_st_93_C8.raw	33025.7	Control_1
Palm3	A2TJV2	A2TJV2	F:\Yifan\20230908_singletubule_raw\230901_st_93_A8.raw		Control_1
Palm3	A2TJV2	A2TJV2	F:\Yifan\20230908_singletubule_raw\230901_st_93_G3.raw		Control_1
Palm3	A2TJV2	A2TJV2	F:\Yifan\20230908_singletubule_raw\230901_st_93_E1.raw		Control_1
Palm3	A2TJV2	A2TJV2	F:\Yifan\20230908_singletubule_raw\230901_st_93_C2.raw		Control_1
Palm3	A2TJV2	A2TJV2	F:\Yifan\20230908_singletubule_raw\230901_st_93_B3.raw		Control_1
Palm3	A2TJV2	A2TJV2	F:\Yifan\20230908_singletubule_raw\230901_st_93_A7.raw		Control_1
Palm3	A2TJV2	A2TJV2	F:\Yifan\20230908_singletubule_raw\230901_st_93_G6.raw		Control_1
Palm3	A2TJV2	A2TJV2	F:\Yifan\20230908_singletubule_raw\230901_st_93_D7.raw		Control_1
Palm3	A2TJV2	A2TJV2	F:\Yifan\20230908_singletubule_raw\230901_st_93_G1.raw		Control_1
Palm3	A2TJV2	A2TJV2	F:\Yifan\20230908_singletubule_raw\230901_st_93_H6.raw		Control_1
Palm3	A2TJV2	A2TJV2	F:\Yifan\20230908_singletubule_raw\230901_st_93_A4.raw		Control_1
Palm3	A2TJV2	A2TJV2	F:\Yifan\20230908_singletubule_raw\230901_st_93_B8.raw		Control_1
Palm3	A2TJV2	A2TJV2	F:\Yifan\20230908_singletubule_raw\230901_st_93_A3.raw		Control_1
Palm3	A2TJV2	A2TJV2	F:\Yifan\20230908_singletubule_raw\230901_st_93_A1.raw		Control_1
[truncated: 894,777+ more rows]
