# Supplementary material for: Diversion of Arginine’s dietary metabolic fate in proteinuric kidney disease
Source: Research Square preprint supplement (doi:10.21203/rs.3.rs-9927381/v1), 2026-06-17
Supplement: Supplementary file 29 [file f5db8bf9dd47ad5b3f0ecbd4.xlsx]

## Sheet: Summary
Metabolite	Metabolite_abbrev	N_pairs	mean_log2_remission	std_log2_remission	mean_log2_active	std_log2_active	mean_log2_diff	std_log2_diff	sem_log2_diff	median_log2_diff	mean_fold_change_remission_over_active	pval_ttest
Arginine	Arg	22	25.6971	0.120521	25.8106	0.124586	-0.113513	0.12617	0.0268995	-0.089034	0.927662	0.000384048
Ornithine	Orn	22	25.2549	0.303243	25.3594	0.292082	-0.104456	0.268094	0.0571579	-0.112998	0.945996	0.0818711
Citrulline	Cit	22	22.5184	0.28501	22.4491	0.408606	0.069357	0.289968	0.0618214	0.0669583	1.07007	0.274573
Arginino succinic acid	ArgSuc	22	11.5171	0.748584	11.9965	0.600656	-0.479405	0.851919	0.18163	-0.458416	0.839575	0.0153286
Aspartic acid	Asp	22	18.5051	0.354093	19.0844	0.528879	-0.579245	0.574682	0.122523	-0.541977	0.72323	0.000114294
Proline	Pro	22	24.7727	0.323338	24.508	0.358583	0.264674	0.345654	0.0736936	0.292727	1.23369	0.00171756
Glutamic acid	Glu	22	21.313	0.645179	21.3306	0.26884	-0.01768	0.714593	0.152352	-0.0879082	1.21741	0.908718
Glutamine	Gln	22	25.0801	0.19284	25.0543	0.226055	0.0258517	0.249142	0.0531172	0.00375585	1.03284	0.631518
Guanidineacetic acid	GAA	22	18.6514	0.412682	18.5187	0.575026	0.132709	0.608607	0.129755	-0.0262984	1.21665	0.318059
Agmatine	Agm	22	13.4154	0.836078	12.8987	1.09017	0.516781	1.31071	0.279444	0.363957	2.11879	0.0785385

## Sheet: Patient_level
Metabolite	Metabolite_abbrev	Patient_ID	log2_remission	log2_active	log2_diff	raw_remission	raw_active
Arginine	Arg	MN1	25.6373	25.5581	0.0792088	52192240	49403956
Arginine	Arg	MN10	25.7824	25.8395	-0.0570072	57715096	60041328
Arginine	Arg	MN11	25.702	25.7893	-0.0872796	54584596	57988768
Arginine	Arg	MN12	25.6825	25.7733	-0.0907883	53852080	57349876
Arginine	Arg	MN13	25.7128	25.9167	-0.203815	54996740	63341960
Arginine	Arg	MN14	25.5805	25.6393	-0.058747	50176844	52262232
Arginine	Arg	MN15	25.8377	25.7746	0.0631613	59969288	57400468
Arginine	Arg	MN16	25.6594	25.731	-0.0715753	52998028	55693692
Arginine	Arg	MN17	25.7197	25.8161	-0.0964083	55258944	59077808
Arginine	Arg	MN18	25.6234	25.8097	-0.186351	51690316	58817472
Arginine	Arg	MN19	25.9604	25.9574	0.00301474	65292312	65156016
Arginine	Arg	MN2	25.5178	25.5526	-0.0347962	48041952	49214756
Arginine	Arg	MN20	25.6343	25.9503	-0.316024	52081812	64836380
Arginine	Arg	MN21	25.8912	25.8504	0.0407577	62232184	60498660
Arginine	Arg	MN22	25.7581	25.8518	-0.0936722	56751144	60558172
Arginine	Arg	MN3	25.6608	25.6719	-0.0111066	53048136	53458104
Arginine	Arg	MN4	25.66	25.9871	-0.32703	53019640	66509336
Arginine	Arg	MN5	25.5584	25.798	-0.239548	49414528	58339896
Arginine	Arg	MN6	25.8434	26.0171	-0.173658	60207628	67909072
Arginine	Arg	MN7	25.7563	25.8196	-0.0633802	56677232	59222668
Arginine	Arg	MN8	25.704	25.8892	-0.185198	54660992	62148072
Arginine	Arg	MN9	25.4537	25.8407	-0.387052	45953312	60093988
Ornithine	Orn	MN1	25.1416	25.2774	-0.135823	37014364	40668392
Ornithine	Orn	MN10	24.9965	25.378	-0.381526	33472224	43604904
Ornithine	Orn	MN11	25.7002	25.7272	-0.0270265	54517688	55548612
Ornithine	Orn	MN12	25.0264	25.338	-0.311572	34173668	42411560
Ornithine	Orn	MN13	25.4309	26.0122	-0.581304	45232308	67676632
Ornithine	Orn	MN14	24.99	24.9142	0.0757383	33322002	31617796
Ornithine	Orn	MN15	25.1379	24.8961	0.241798	36921132	31223860
Ornithine	Orn	MN16	24.9036	25.232	-0.32838	31385474	39407684
Ornithine	Orn	MN17	25.5421	25.5041	0.0380138	48859632	47589036
Ornithine	Orn	MN18	25.288	25.4483	-0.160289	40968168	45782388
Ornithine	Orn	MN19	24.8427	24.9329	-0.0901737	30089082	32029778
Ornithine	Orn	MN2	25.4106	25.6193	-0.208663	44602748	51543672
Ornithine	Orn	MN20	25.1247	25.3731	-0.248457	36582844	43458068
Ornithine	Orn	MN21	25.3017	25.4392	-0.137562	41357964	45495608
Ornithine	Orn	MN22	25.7105	25.1295	0.580956	54906980	36706444
Ornithine	Orn	MN3	25.49	25.3312	0.158796	47126088	42214236
Ornithine	Orn	MN4	25.032	25.0057	0.0262345	34306484	33688280
Ornithine	Orn	MN5	24.7892	25.3325	-0.543313	28992666	42251444
Ornithine	Orn	MN6	25.9249	25.9021	0.0227672	63703920	62706500
Ornithine	Orn	MN7	25.3691	25.2268	0.14231	43337924	39267072
Ornithine	Orn	MN8	25.4193	25.4827	-0.0634321	44870652	46887528
Ornithine	Orn	MN9	25.0371	25.4042	-0.36712	34428512	44405048
Citrulline	Cit	MN1	22.5104	22.0632	0.447237	5974638	4382075
Citrulline	Cit	MN10	22.5385	22.4788	0.0596386	6091861	5.84517e+06
Citrulline	Cit	MN11	23.049	23.4151	-0.366013	8678703	11184995
Citrulline	Cit	MN12	22.7253	22.6941	0.0311134	6.93399e+06	6786055
Citrulline	Cit	MN13	22.5914	22.8212	-0.229741	6.31963e+06	7410554
Citrulline	Cit	MN14	22.7624	22.4086	0.353838	7115047	5.56752e+06
Citrulline	Cit	MN15	22.131	22.2691	-0.138104	4.59295e+06	5.05434e+06
Citrulline	Cit	MN16	22.7483	22.344	0.404265	7045420	5.32367e+06
Citrulline	Cit	MN17	22.6994	22.108	0.591322	6810618	4.52044e+06
Citrulline	Cit	MN18	22.4069	21.7696	0.637328	5.56091e+06	3.57513e+06
Citrulline	Cit	MN19	22.7846	22.9209	-0.13626	7225126	7.94079e+06
Citrulline	Cit	MN2	22.3361	22.1488	0.187384	5294769	4.64985e+06
Citrulline	Cit	MN20	22.5721	22.7704	-0.198217	6.23578e+06	7154187
Citrulline	Cit	MN21	22.757	22.6088	0.14823	7088411	6396275
Citrulline	Cit	MN22	22.2554	22.4359	-0.180487	5.00648e+06	5.67368e+06
Citrulline	Cit	MN3	22.6365	22.526	0.110496	6520388	6039636
Citrulline	Cit	MN4	22.3078	22.13	0.177757	5191762	4.58991e+06
Citrulline	Cit	MN5	21.79	21.9426	-0.152631	3.62605e+06	4.0307e+06
Citrulline	Cit	MN6	22.8606	23.2622	-0.401594	7.61577e+06	10060184
Citrulline	Cit	MN7	22.3162	22.1415	0.174787	5.22225e+06	4.62638e+06
Citrulline	Cit	MN8	22.357	22.2827	0.074278	5.37193e+06	5.10236e+06
Citrulline	Cit	MN9	22.2694	22.3382	-0.0687732	5.0554e+06	5.30223e+06
Arginino succinic acid	ArgSuc	MN1	11.2834	11.285	-0.00163377	2491.51	2494.33
Arginino succinic acid	ArgSuc	MN10	10.8409	11.6673	-0.826396	1833.12	3251.36
Arginino succinic acid	ArgSuc	MN11	12.5066	13.1585	-0.651848	5818.2	9142
Arginino succinic acid	ArgSuc	MN12	11.6892	11.9986	-0.309445	3301.13	4091.11
Arginino succinic acid	ArgSuc	MN13	12.5069	12.2626	0.244294	5819.44	4912.78
Arginino succinic acid	ArgSuc	MN14	11.5237	11.8083	-0.284607	2943.33	3585.42
Arginino succinic acid	ArgSuc	MN15	12.502	12.0285	0.473525	5799.7	4176.68
Arginino succinic acid	ArgSuc	MN16	11.7254	11.3093	0.416078	3385.08	2536.73
Arginino succinic acid	ArgSuc	MN17	11.6968	11.9269	-0.23006	3318.61	3892.51
Arginino succinic acid	ArgSuc	MN18	11.3834	11.3358	0.0475984	2670.45	2583.75
Arginino succinic acid	ArgSuc	MN19	11.6809	12.4312	-0.75028	3282.34	5521.96
Arginino succinic acid	ArgSuc	MN2	10.6448	11.2833	-0.638514	1600.07	2491.42
Arginino succinic acid	ArgSuc	MN20	11.1843	11.7917	-0.607387	2326.12	3544.36
Arginino succinic acid	ArgSuc	MN21	12.1035	11.91	0.19354	4399.75	3847.27
Arginino succinic acid	ArgSuc	MN22	9.57005	12.012	-2.44199	759.1	4129.31
Arginino succinic acid	ArgSuc	MN3	11.511	12.4131	-0.90217	2917.4	5453.12
Arginino succinic acid	ArgSuc	MN4	11.2937	13.4258	-2.13214	2509.38	11003.7
Arginino succinic acid	ArgSuc	MN5	10.8319	11.7556	-0.923716	1821.74	3456.72
Arginino succinic acid	ArgSuc	MN6	12.5402	12.6699	-0.129704	5955.17	6515.47
Arginino succinic acid	ArgSuc	MN7	12.4686	11.1136	1.35504	5667.09	2214.79
Arginino succinic acid	ArgSuc	MN8	11.0936	12.5407	-1.44705	2184.27	5957.16
Arginino succinic acid	ArgSuc	MN9	10.7963	11.7963	-1.00004	1777.27	3555.63
Aspartic acid	Asp	MN1	18.4941	18.7975	-0.303327	369225	455619
Aspartic acid	Asp	MN10	18.2817	18.8127	-0.531035	318670	460468
Aspartic acid	Asp	MN11	18.4472	18.5479	-0.100625	357414	383232
Aspartic acid	Asp	MN12	18.4527	19.3271	-0.8744	358760	657696
Aspartic acid	Asp	MN13	18.1794	18.8686	-0.689218	296853	478650
Aspartic acid	Asp	MN14	18.3206	18.5116	-0.190923	327385	373708
Aspartic acid	Asp	MN15	18.7083	18.0023	0.705964	428310	262567
Aspartic acid	Asp	MN16	18.4668	19.2723	-0.805441	362301	633187
Aspartic acid	Asp	MN17	19.4058	19.1022	0.30357	694580	562780
Aspartic acid	Asp	MN18	18.1831	19.4614	-1.27821	297626	721857
Aspartic acid	Asp	MN19	19.1185	18.9894	0.129101	569185	520463
Aspartic acid	Asp	MN2	18.1528	18.652	-0.49924	291433	411932
Aspartic acid	Asp	MN20	18.6973	19.2445	-0.54729	425045	621135
Aspartic acid	Asp	MN21	18.3695	18.5392	-0.169749	338656	380941
Aspartic acid	Asp	MN22	17.9445	18.4811	-0.536663	252246	365912
Aspartic acid	Asp	MN3	18.8981	19.2905	-0.392479	488516	641250
Aspartic acid	Asp	MN4	18.8416	20.4214	-1.57983	469766	1.4043e+06
Aspartic acid	Asp	MN5	18.7704	19.3954	-0.625048	447135	689600
Aspartic acid	Asp	MN6	18.3792	19.6101	-1.23092	340938	800238
Aspartic acid	Asp	MN7	18.2916	19.6225	-1.33086	320873	807165
Aspartic acid	Asp	MN8	18.6419	19.456	-0.814115	409052	719203
Aspartic acid	Asp	MN9	18.0681	19.4508	-1.38266	274814	716577
Proline	Pro	MN1	25.2369	24.6533	0.583634	39542972	26386276
Proline	Pro	MN10	24.6137	24.2837	0.330065	25672834	20422750
Proline	Pro	MN11	24.9664	25.1288	-0.162452	32781864	36689056
Proline	Pro	MN12	24.9207	24.0779	0.842855	31760654	17707802
Proline	Pro	MN13	24.7013	24.395	0.306296	27278790	22060784
Proline	Pro	MN14	24.3843	24.0767	0.307531	21897346	17693568
Proline	Pro	MN15	24.0801	23.801	0.279158	17735194	14615072
Proline	Pro	MN16	24.3537	24.2941	0.0595345	21437974	20571316
Proline	Pro	MN17	24.6416	24.7972	-0.155659	26172594	29154440
Proline	Pro	MN18	24.5528	25.1309	-0.578118	24610800	36741480
Proline	Pro	MN19	24.9372	24.5787	0.358528	32125598	25056674
Proline	Pro	MN2	25.1344	24.4063	0.728138	36830324	22233824
Proline	Pro	MN20	24.6441	24.5621	0.0820033	26218262	24769568
Proline	Pro	MN21	24.965	24.3718	0.593191	32750698	21709618
Proline	Pro	MN22	24.8387	24.6988	0.139844	30004228	27232364
Proline	Pro	MN3	24.5617	24.5838	-0.022164	24762920	25146288
Proline	Pro	MN4	24.8392	24.6913	0.147945	30015516	27090050
Proline	Pro	MN5	24.5588	24.6023	-0.0434931	24713234	25469610
Proline	Pro	MN6	24.9763	24.3213	0.65504	33007966	20961962
Proline	Pro	MN7	24.4959	23.9104	0.585494	23659934	15767484
Proline	Pro	MN8	25.1615	24.9855	0.175981	37527704	33218234
Proline	Pro	MN9	25.4351	24.8256	0.609485	45366408	29734542
Glutamic acid	Glu	MN1	21.0321	21.2164	-0.18437	2.14426e+06	2436573
Glutamic acid	Glu	MN10	21.1297	21.6675	-0.537851	2.29435e+06	3.33096e+06
Glutamic acid	Glu	MN11	21.0624	21.1598	-0.0974337	2.18979e+06	2.34279e+06
Glutamic acid	Glu	MN12	20.83	21.0845	-0.254506	1.86403e+06	2.22365e+06
Glutamic acid	Glu	MN13	21.2466	21.1974	0.0492451	2.48807e+06	2.40458e+06
Glutamic acid	Glu	MN14	20.9936	21.1476	-0.154003	2087871	2.32307e+06
Glutamic acid	Glu	MN15	21.0068	20.8316	0.175221	2107020	1.86604e+06
Glutamic acid	Glu	MN16	21.0007	21.3294	-0.328681	2.09824e+06	2.63511e+06
Glutamic acid	Glu	MN17	21.2936	21.1908	0.1028	2.57044e+06	2393656
Glutamic acid	Glu	MN18	20.9859	21.2582	-0.272299	2.07683e+06	2508248
Glutamic acid	Glu	MN19	21.3677	21.2008	0.166851	2705901	2410375
Glutamic acid	Glu	MN2	21.4272	21.4946	-0.0674046	2.81995e+06	2954830
Glutamic acid	Glu	MN20	21.4058	21.3148	0.0909799	2.77841e+06	2.60861e+06
Glutamic acid	Glu	MN21	21.1755	21.0855	0.0899762	2.36843e+06	2225226
Glutamic acid	Glu	MN22	23.9626	21.0304	2.93218	16347502	2.14179e+06
Glutamic acid	Glu	MN3	21.7721	21.8516	-0.0795319	3581311	3.78428e+06
Glutamic acid	Glu	MN4	21.095	21.6021	-0.507093	2.23986e+06	3.18325e+06
Glutamic acid	Glu	MN5	21.509	21.3507	0.158345	2.98445e+06	2.67422e+06
Glutamic acid	Glu	MN6	21.0871	21.1834	-0.0962845	2.22768e+06	2.38143e+06
Glutamic acid	Glu	MN7	21.0081	21.7326	-0.724531	2108897	3.48467e+06
Glutamic acid	Glu	MN8	21.7022	21.7723	-0.0701076	3.41196e+06	3.58186e+06
Glutamic acid	Glu	MN9	20.7917	21.5722	-0.780465	1.81522e+06	3.11797e+06
Glutamine	Gln	MN1	25.0006	24.9595	0.0410748	33567512	32625292
Glutamine	Gln	MN10	25.2967	25.1759	0.12084	41216864	37905168
Glutamine	Gln	MN11	25.2379	25.0939	0.143978	39569936	35811600
Glutamine	Gln	MN12	24.7828	24.8052	-0.0224284	28864770	29317014
Glutamine	Gln	MN13	25.0322	24.747	0.285178	34312072	28157880
Glutamine	Gln	MN14	24.8415	24.6775	0.164044	30063420	26832188
Glutamine	Gln	MN15	24.935	25.116	-0.181	32076084	36363684
Glutamine	Gln	MN16	25.1385	24.9331	0.205397	36936268	32034828
Glutamine	Gln	MN17	25.0487	25.3178	-0.26905	34706520	41821856
Glutamine	Gln	MN18	25.0382	24.8104	0.227864	34455868	29421800
Glutamine	Gln	MN19	24.8347	25.2641	-0.429389	29921972	40294820
Glutamine	Gln	MN2	24.961	24.5401	0.420847	32659146	24395918
Glutamine	Gln	MN20	25.1021	25.2825	-0.180484	36014132	40813524
Glutamine	Gln	MN21	25.4556	25.2368	0.218809	46014768	39539312
Glutamine	Gln	MN22	25.2278	25.2822	-0.054362	39293516	40802380
Glutamine	Gln	MN3	25.1334	25.1909	-0.0575366	36803920	38301372
Glutamine	Gln	MN4	25.2689	25.3012	-0.0323506	40428044	41344832
Glutamine	Gln	MN5	24.9352	25.1126	-0.177322	32081468	36277168
Glutamine	Gln	MN6	25.1994	25.1694	0.0299401	38526984	37735676
Glutamine	Gln	MN7	25.4451	24.8597	0.585396	45682288	30445718
Glutamine	Gln	MN8	25.0553	25.1526	-0.0972792	34866544	37298628
Glutamine	Gln	MN9	24.7925	25.1659	-0.373427	29058612	37643304
Guanidineacetic acid	GAA	MN1	19.0021	19.0413	-0.0392841	525036	539529
Guanidineacetic acid	GAA	MN10	19.0315	18.5298	0.501695	535858	378464
Guanidineacetic acid	GAA	MN11	18.1757	18.5114	-0.335729	296087	373666
Guanidineacetic acid	GAA	MN12	18.521	18.4984	0.02265	376168	370308
Guanidineacetic acid	GAA	MN13	18.179	18.1923	-0.0133127	296771	299522
Guanidineacetic acid	GAA	MN14	18.5008	16.4777	2.02308	370934	91261.3
Guanidineacetic acid	GAA	MN15	18.4633	19.1323	-0.669015	361404	574628
Guanidineacetic acid	GAA	MN16	18.3186	18.4557	-0.137049	326929	359508
Guanidineacetic acid	GAA	MN17	18.8878	17.9736	0.914257	485074	257388
Guanidineacetic acid	GAA	MN18	18.719	18.281	0.438016	431513	318520
Guanidineacetic acid	GAA	MN19	19.1949	19.0263	0.168608	600110	533919
Guanidineacetic acid	GAA	MN2	17.9098	18.481	-0.571243	246254	365885
Guanidineacetic acid	GAA	MN20	19.0866	19.208	-0.12137	556717	605579
Guanidineacetic acid	GAA	MN21	19.4496	18.4575	0.99212	716007	359964
Guanidineacetic acid	GAA	MN22	18.6893	18.8406	-0.151314	422696	469438
Guanidineacetic acid	GAA	MN3	18.3417	18.4064	-0.0647549	332194	347444
Guanidineacetic acid	GAA	MN4	18.5493	18.2763	0.27293	383608	317488
Guanidineacetic acid	GAA	MN5	18.6301	19.024	-0.393933	405711	533093
Guanidineacetic acid	GAA	MN6	19.4351	19.067	0.36817	708851	549193
Guanidineacetic acid	GAA	MN7	18.6011	18.1603	0.440842	397639	292942
Guanidineacetic acid	GAA	MN8	18.3314	18.7596	-0.428177	329836	443805
Guanidineacetic acid	GAA	MN9	18.3139	18.6115	-0.297588	325856	400506
Agmatine	Agm	MN1	13.0089	12.6416	0.367245	8241.51	6389.1
Agmatine	Agm	MN10	12.1338	12.3956	-0.26186	4492.94	5387.34
Agmatine	Agm	MN11	12.2447	12.0732	0.171525	4852.1	4308.09
Agmatine	Agm	MN12	14.4679	13.8897	0.57827	22660.1	15176.6
Agmatine	Agm	MN13	13.0323	13.7222	-0.689886	8376.29	13512.9
Agmatine	Agm	MN14	13.7522	14.7559	-1.0037	13797.6	27666.9
Agmatine	Agm	MN15	12.5592	14.1779	-1.61868	6034.27	18532.9
Agmatine	Agm	MN16	12.8716	14.7754	-1.90385	7493.3	28043.4
Agmatine	Agm	MN17	12.9431	13.0672	-0.124104	7874.11	8581.53
Agmatine	Agm	MN18	14.0381	12.5094	1.5287	16820.9	5829.29
Agmatine	Agm	MN19	14.2125	12.8279	1.38463	18983.4	7269.77
Agmatine	Agm	MN2	14.6911	14.5618	0.129325	26451.8	24183.7
Agmatine	Agm	MN20	14.2649	12.6961	1.5688	19685.3	6635.05
Agmatine	Agm	MN21	13.1999	13.9479	-0.747993	9408.64	15802.1
Agmatine	Agm	MN22	13.3903	13.1558	0.234572	10736.3	9125.03
Agmatine	Agm	MN3	14.3638	12.2729	2.0909	21082.3	4947.98
Agmatine	Agm	MN4	13.4888	12.3565	1.13231	11494.9	5243.26
Agmatine	Agm	MN5	14.5513	11.4631	3.08815	24007.6	2822.2
Agmatine	Agm	MN6	13.4775	11.8411	1.63645	11405.3	3667.8
Agmatine	Agm	MN7	12.1527	11.792	0.360668	4552.18	3545.03
Agmatine	Agm	MN8	12.2743	11.6352	0.639146	4952.89	3179.86
Agmatine	Agm	MN9	14.0207	11.2122	2.80856	16620	2371.44
