# Supplementary material for: Diversion of Arginine’s dietary metabolic fate in proteinuric kidney disease
Source: Research Square preprint supplement (doi:10.21203/rs.3.rs-9927381/v1), 2026-06-17
Supplement: Supplementary file 30 [file fcfb6ab056e6c42822929ab8.xlsx]

## Sheet: Kid. Cortex
Organ	PG.Genes	PG.ProteinNames	PG.UniProtIds	Control_AD_1__PG.NrOfStrippedSequencesUsedForQuantification	Control_AD_2__PG.NrOfStrippedSequencesUsedForQuantification	Control_AD_3__PG.NrOfStrippedSequencesUsedForQuantification	Control_AD_4__PG.NrOfStrippedSequencesUsedForQuantification	Control_AD_5__PG.NrOfStrippedSequencesUsedForQuantification	Control_ND_1__PG.NrOfStrippedSequencesUsedForQuantification	Control_ND_2__PG.NrOfStrippedSequencesUsedForQuantification	Control_ND_3__PG.NrOfStrippedSequencesUsedForQuantification	Control_ND_4__PG.NrOfStrippedSequencesUsedForQuantification	Control_ND_5__PG.NrOfStrippedSequencesUsedForQuantification	Proteinuric_AD_1__PG.NrOfStrippedSequencesUsedForQuantification	Proteinuric_AD_2__PG.NrOfStrippedSequencesUsedForQuantification	Proteinuric_AD_3__PG.NrOfStrippedSequencesUsedForQuantification	Proteinuric_AD_4__PG.NrOfStrippedSequencesUsedForQuantification	Proteinuric_AD_5__PG.NrOfStrippedSequencesUsedForQuantification	Proteinuric_ND_1__PG.NrOfStrippedSequencesUsedForQuantification	Proteinuric_ND_2__PG.NrOfStrippedSequencesUsedForQuantification	Proteinuric_ND_3__PG.NrOfStrippedSequencesUsedForQuantification	Proteinuric_ND_4__PG.NrOfStrippedSequencesUsedForQuantification	Control_AD_1__PG.Coverage	Control_AD_2__PG.Coverage	Control_AD_3__PG.Coverage	Control_AD_4__PG.Coverage	Control_AD_5__PG.Coverage	Control_ND_1__PG.Coverage	Control_ND_2__PG.Coverage	Control_ND_3__PG.Coverage	Control_ND_4__PG.Coverage	Control_ND_5__PG.Coverage	Proteinuric_AD_1__PG.Coverage	Proteinuric_AD_2__PG.Coverage	Proteinuric_AD_3__PG.Coverage	Proteinuric_AD_4__PG.Coverage	Proteinuric_AD_5__PG.Coverage	Proteinuric_ND_1__PG.Coverage	Proteinuric_ND_2__PG.Coverage	Proteinuric_ND_3__PG.Coverage	Proteinuric_ND_4__PG.Coverage	Control_AD_1__PG.Pvalue	Control_AD_2__PG.Pvalue	Control_AD_3__PG.Pvalue	Control_AD_4__PG.Pvalue	Control_AD_5__PG.Pvalue	Control_ND_1__PG.Pvalue	Control_ND_2__PG.Pvalue	Control_ND_3__PG.Pvalue
Kid. Cortex	Col12a1	COCA1_MOUSE	Q60847	54	44	49	52	49	60	83	72	74	76	87	106	99	98	101	99	95	92	105	22.7%	21.5%	21.3%	22.7%	21.4%	25.9%	33.6%	30.4%	32.2%	31.9%	35.4%	41.8%	39.7%	39.6%	40.9%	38.8%	39.3%	38.4%	42.3%	2.1652e-18	2.1652e-18	2.1652e-18	2.1652e-18	2.1652e-18	2.1652e-18	2.1652e-18	2.1652e-18
Kid. Cortex	Col14a1	B7ZNH7_MOUSE	B7ZNH7	47	44	48	46	48	47	53	50	54	51	49	53	52	53	51	53	52	53	54	33.2%	30.3%	34.2%	34.1%	33.6%	33.5%	38.4%	36.7%	39.1%	37.3%	36.3%	38.7%	38.6%	39.1%	38.1%	38.7%	38.5%	38.5%	39.2%	4.8127e-21	4.8127e-21	4.8127e-21	4.8127e-21	4.8127e-21	4.8127e-21	4.8127e-21	4.8127e-21
Kid. Cortex	Col15a1	A2AJY2_MOUSE;COFA1_MOUSE	A2AJY2;O35206	17	16	18	16	18	18	18	18	17	18	18	17	18	17	17	18	18	18	18	17.7%;17.4%	15.7%;15.4%	19.1%;18.8%	15.7%;15.4%	19.1%;18.8%	19%;18.7%	19.1%;18.8%	19.1%;18.8%	17.7%;17.4%	18.4%;18.1%	19.1%;18.8%	17.1%;16.8%	19.1%;18.8%	17.1%;16.8%	17.1%;16.8%	19.1%;18.8%	19.1%;18.8%	19.1%;18.8%	19.6%;19.2%	3.90213e-19	3.90213e-19	3.90213e-19	3.90213e-19	3.90213e-19	3.90213e-19	3.90213e-19	3.90213e-19
Kid. Cortex	Col16a1	A3KFV7_MOUSE;COGA1_MOUSE	A3KFV7;Q8BLX7	1	1	1	1			1	1				1		1	1	1			1	0.5%;0.4%	0.5%;0.4%	0.5%;0.4%	0.5%;0.4%			0.5%;0.4%	0.5%;0.4%				0.5%;0.4%		0.5%;0.4%	0.5%;0.4%	0.5%;0.4%			0.5%;0.4%	0.00144542	0.00144542	0.00144542	0.00144542			0.00144542	0.00144542
Kid. Cortex	Col17a1	COHA1_MOUSE	Q07563	1	1		1									1				1	1	1	0.6%	0.6%		0.6%									0.6%				0.6%	0.6%	0.6%	0.00756704	0.00756704		0.00756704
Kid. Cortex	Col18a1	E9QPX1_MOUSE;COIA1_MOUSE	E9QPX1;P39061	24	20	22	22	23	21	26	27	24	22	24	24	25	25	25	27	25	26	28	17.4%;17.4%	14.7%;14.7%	16.5%;16.5%	16%;16%	16%;16%	14.5%;14.5%	18.1%;18.1%	18.4%;18.4%	16.4%;16.4%	14.9%;14.9%	17.4%;17.4%	17.1%;17.1%	18%;18%	17.5%;17.5%	16.1%;16.1%	18.7%;18.7%	17.5%;17.5%	18.1%;18.1%	18.8%;18.8%	1.0797e-19	1.0797e-19	1.0797e-19	1.0797e-19	1.0797e-19	1.0797e-19	1.0797e-19	1.0797e-19
Kid. Cortex	Col1a1	CO1A1_MOUSE	P11087	17	15	13	15	11	10	24	24	15	18	18	20	17	12	18	20	22	19	26	18%	13.1%	12.7%	16%	10%	9.7%	22.7%	22.7%	15.1%	17.5%	17.5%	19.8%	15.9%	11%	18%	19.1%	21.7%	19.5%	25%	1.39173e-27	1.39173e-27	1.39173e-27	1.39173e-27	1.39173e-27	1.39173e-27	1.39173e-27	1.39173e-27
Kid. Cortex	Col1a2	CO1A2_MOUSE	Q01149	17	17	15	18	16	14	18	20	18	18	19	20	16	17	20	18	19	19	20	18.5%	18.7%	16.3%	19.9%	16.8%	16.3%	20.3%	21.6%	19.4%	19.9%	20.3%	21.6%	17.3%	19.7%	21.6%	18.3%	21%	21.6%	21.6%	1.66395e-15	1.66395e-15	1.66395e-15	1.66395e-15	1.66395e-15	1.66395e-15	1.66395e-15	1.66395e-15
Kid. Cortex	Col26a1	COQA1_MOUSE	Q91VF6					1						1	1		1		1	1	1	1					3%						3%	3%		3%		3%	3%	3%	3%					7.2068e-10
Kid. Cortex	Col3a1	CO3A1_MOUSE	P08121	6	3	5	5	1	4	8	6	7	8	6	7	6	5	5	7	8	8	5	2.9%	1.4%	2.9%	2.9%	1%	3%	5.1%	3.9%	3.6%	5.1%	5.4%	4.6%	3.9%	2.8%	2.8%	3.6%	4.6%	4.6%	3.1%	2.8551e-14	2.8551e-14	2.8551e-14	2.8551e-14	2.8551e-14	2.8551e-14	2.8551e-14	2.8551e-14
Kid. Cortex	Col4a1	CO4A1_MOUSE	P02463	10	8	11	10	6	7	10	11	9	11	8	10	9	7	11	9	10	10	10	8.2%	7%	8.9%	8.2%	5.2%	5.8%	8.2%	8.9%	8.1%	8.9%	5.9%	7.7%	7.7%	5.8%	8.9%	7.7%	8.8%	8.8%	8.8%	1.18983e-20	1.18983e-20	1.18983e-20	1.18983e-20	1.18983e-20	1.18983e-20	1.18983e-20	1.18983e-20
Kid. Cortex	Col4a2	CO4A2_MOUSE	P08122	18	17	14	17	10	15	18	15	14	19	14	18	17	16	18	17	19	15	19	14.9%	13.8%	12.8%	13.7%	9.6%	13.5%	14.9%	14.3%	12.8%	16.1%	12.8%	15.9%	14.6%	14.6%	16.1%	14.8%	16.1%	13.5%	16.1%	1.89435e-14	1.89435e-14	1.89435e-14	1.89435e-14	1.89435e-14	1.89435e-14	1.89435e-14	1.89435e-14
Kid. Cortex	Col4a3	CO4A3_MOUSE	Q9QZS0	5	5	3	5	2	4	5	5	4	5	3	5	3	3	5	4	5	5	5	5.5%	5.8%	2.5%	5.5%	1.9%	4.3%	5.5%	5.5%	4.3%	5.5%	2.5%	5.5%	2.5%	2.5%	5.5%	4.3%	5.5%	5.5%	5.5%	1.08525e-16	1.08525e-16	1.08525e-16	1.08525e-16	1.08525e-16	1.08525e-16	1.08525e-16	1.08525e-16
Kid. Cortex	Col4a4	CO4A4_MOUSE	Q9QZR9	7	4	5	4	3	4	6	8	6	6	4	7	4	4	6	6	7	5	7	6.1%	3.4%	4.5%	3.4%	2.7%	3.3%	5.1%	8.1%	5.6%	5.6%	3.4%	7.1%	3.8%	3.3%	5.1%	5.1%	7.6%	4.5%	7.1%	1.19484e-13	1.19484e-13	1.19484e-13	1.19484e-13	1.19484e-13	1.19484e-13	1.19484e-13	1.19484e-13
Kid. Cortex	Col4a5	F7CK55_MOUSE;Q63ZW6_MOUSE	F7CK55;Q63ZW6	6	4	4	4	4	4	4	5	4	6	3	4	4	4	5	4	4	4	4	9.8%;4.6%	5.8%;2.7%	5.4%;2.5%	5.4%;2.5%	5.4%;2.5%	5.4%;2.5%	5.4%;2.5%	7.2%;3.4%	5.4%;2.5%	9.8%;4.6%	3.9%;1.8%	5.4%;2.5%	5.4%;2.5%	5.4%;2.5%	7.2%;3.4%	5.4%;2.5%	5.4%;2.5%	5.4%;2.5%	5.4%;2.5%	5.28944e-20	5.28944e-20	5.28944e-20	5.28944e-20	5.28944e-20	5.28944e-20	5.28944e-20	5.28944e-20
Kid. Cortex	Col4a6	B1AVK5_MOUSE	B1AVK5	2	2	1	1		2	2	2	1	3		3	1	1	2		2	2	2	2.1%	2.1%	0.5%	0.5%		2.1%	2.1%	2.1%	0.5%	2.7%		2.7%	0.5%	0.5%	2.1%		2.1%	2.1%	2.1%	2.34748e-06	2.34748e-06	2.34748e-06	2.34748e-06		2.34748e-06	2.34748e-06	2.34748e-06
Kid. Cortex	Col5a1	CO5A1_MOUSE	O88207	4	3	6	7	7	6	8	7	6	7	7	9	6	8	8	8	9	9	9	4.2%	3.3%	6.3%	6.9%	7%	5.2%	7.1%	5.9%	6.5%	7%	7%	7.6%	5.4%	7.6%	5.9%	7.6%	7.6%	7.6%	7.6%	3.44463e-11	3.44463e-11	3.44463e-11	3.44463e-11	3.44463e-11	3.44463e-11	3.44463e-11	3.44463e-11
Kid. Cortex	Col5a2	CO5A2_MOUSE	Q3U962	2	1	3	1	2	1	3	2	2	2	3	3	2	3	3	2	3	3	3	1.9%	0.6%	2.9%	0.6%	1.6%	0.6%	2.9%	1.9%	1.6%	1.6%	2.9%	2.9%	1.9%	2.9%	2.9%	1.9%	2.9%	2.9%	2.9%	1.27717e-06	1.27717e-06	1.27717e-06	1.27717e-06	1.27717e-06	1.27717e-06	1.27717e-06	1.27717e-06
Kid. Cortex	Col5a3	Q9JLI2_MOUSE	Q9JLI2	3		1	2	1		2	3	3	2	2	1	3		2	3	3	3	2	2.2%		0.6%	1.7%	0.6%		1.6%	2.2%	2.2%	1.2%	1.2%	0.6%	2.2%		1.2%	2.2%	2.2%	2.2%	1.2%	2.92654e-08		2.92654e-08	2.92654e-08	2.92654e-08		2.92654e-08	2.92654e-08
Kid. Cortex	Col6a1	CO6A1_MOUSE	Q04857	32	24	29	30	29	28	30	29	29	30	24	29	27	31	32	30	31	28	30	37.3%	26%	33.5%	35.6%	33.2%	34.1%	36.8%	34.2%	33%	34%	29%	33.1%	33.5%	36.5%	36.3%	36.9%	35.9%	32.6%	33.7%	9.41717e-25	9.41717e-25	9.41717e-25	9.41717e-25	9.41717e-25	9.41717e-25	9.41717e-25	9.41717e-25
Kid. Cortex	Col6a2	CO6A2_MOUSE	Q02788	23	27	19	22	24	19	23	23	23	23	21	23	21	24	22	22	21	22	23	28.8%	28.7%	23.8%	26.1%	28.4%	22%	26.5%	26.7%	26.8%	28.1%	27.3%	27.8%	25.4%	29.9%	26.7%	27.7%	25.6%	27.8%	26.7%	1.80389e-16	1.80389e-16	1.80389e-16	1.80389e-16	1.80389e-16	1.80389e-16	1.80389e-16	1.80389e-16
Kid. Cortex	Col6a3	E9PWQ3_MOUSE	E9PWQ3	112	117	108	107	108	105	116	120	114	118	112	113	112	115	119	113	118	112	116	43.3%	41.5%	43.3%	42.3%	43.5%	41.7%	44%	44.5%	44%	44%	43.1%	43%	43.2%	44.3%	44.5%	42.9%	44.4%	43.1%	43.7%	8.36447e-24	8.36447e-24	8.36447e-24	8.36447e-24	8.36447e-24	8.36447e-24	8.36447e-24	8.36447e-24
Kid. Cortex	Col6a4	CO6A4_MOUSE	A2AX52	1		1	1	1		1		1		1		1	2	1			2	2	0.3%		0.3%	0.3%	0.3%		0.3%		0.3%		0.3%		0.3%	0.8%	0.3%			0.8%	0.8%	8.67693e-05		8.67693e-05	8.67693e-05	8.67693e-05		8.67693e-05
Kid. Cortex	Col6a5	A0A140T8W1_MOUSE;CO6A5_MOUSE	A0A140T8W1;A6H584	9	8	10	7	11	8	12	11	9	11	11	12	10	10	14	13	11	11	10	5.2%;5.2%	4.6%;4.6%	5.7%;5.7%	4.2%;4.2%	6.5%;6.5%	4.7%;4.7%	6.9%;6.9%	6.1%;6.1%	5.3%;5.3%	6.4%;6.4%	5.8%;5.8%	6.8%;6.8%	5.6%;5.6%	5.9%;5.9%	7.6%;7.6%	7.6%;7.6%	7%;7%	6.4%;6.4%	5.8%;5.8%	1.29039e-15	1.29039e-15	1.29039e-15	1.29039e-15	1.29039e-15	1.29039e-15	1.29039e-15	1.29039e-15
Kid. Cortex	Col6a6	E9Q6A6_MOUSE;CO6A6_MOUSE	E9Q6A6;Q8C6K9	2		2	4	2	4	3	5	4	2	4	4	3	6	4	4	4	5	4	1.1%;1.1%		0.8%;0.8%	2.5%;2.5%	1.1%;1.1%	2.5%;2.5%	1.5%;1.5%	3.1%;3.1%	2.3%;2.3%	1.1%;1.1%	2.4%;2.4%	2.4%;2.4%	2%;2%	3.1%;3.1%	2.4%;2.4%	2.4%;2.4%	1.8%;1.8%	2.8%;2.8%	2%;2%	5.12102e-12		5.12102e-12	5.12102e-12	5.12102e-12	5.12102e-12	5.12102e-12	5.12102e-12
Kid. Cortex	Col8a1	CO8A1_MOUSE	Q00780	1	2	1	1			1	2	1	2	2	2	2	1	2	2	2	2	3	1.3%	2.7%	1.3%	1.3%			1.3%	2.7%	1.3%	5%	5%	5%	5%	1.3%	5%	5%	5%	5%	6.3%	3.42917e-16	3.42917e-16	3.42917e-16	3.42917e-16			3.42917e-16	3.42917e-16
[truncated: 182 more columns]

## Sheet: Kid. Medulla
Organ	PG.Genes	PG.ProteinNames	PG.UniProtIds	Control_AD_1__PG.NrOfStrippedSequencesUsedForQuantification	Control_AD_2__PG.NrOfStrippedSequencesUsedForQuantification	Control_AD_3__PG.NrOfStrippedSequencesUsedForQuantification	Control_AD_4__PG.NrOfStrippedSequencesUsedForQuantification	Control_AD_5__PG.NrOfStrippedSequencesUsedForQuantification	Control_AD_6__PG.NrOfStrippedSequencesUsedForQuantification	Control_ND_1__PG.NrOfStrippedSequencesUsedForQuantification	Control_ND_2__PG.NrOfStrippedSequencesUsedForQuantification	Control_ND_3__PG.NrOfStrippedSequencesUsedForQuantification	Control_ND_4__PG.NrOfStrippedSequencesUsedForQuantification	Control_ND_5__PG.NrOfStrippedSequencesUsedForQuantification	Control_ND_6__PG.NrOfStrippedSequencesUsedForQuantification	Proteinuric_AD_1__PG.NrOfStrippedSequencesUsedForQuantification	Proteinuric_AD_2__PG.NrOfStrippedSequencesUsedForQuantification	Proteinuric_AD_3__PG.NrOfStrippedSequencesUsedForQuantification	Proteinuric_AD_4__PG.NrOfStrippedSequencesUsedForQuantification	Proteinuric_AD_5__PG.NrOfStrippedSequencesUsedForQuantification	Proteinuric_ND_1__PG.NrOfStrippedSequencesUsedForQuantification	Proteinuric_ND_2__PG.NrOfStrippedSequencesUsedForQuantification	Proteinuric_ND_3__PG.NrOfStrippedSequencesUsedForQuantification	Proteinuric_ND_4__PG.NrOfStrippedSequencesUsedForQuantification	Control_AD_1__PG.Coverage	Control_AD_2__PG.Coverage	Control_AD_3__PG.Coverage	Control_AD_4__PG.Coverage	Control_AD_5__PG.Coverage	Control_AD_6__PG.Coverage	Control_ND_1__PG.Coverage	Control_ND_2__PG.Coverage	Control_ND_3__PG.Coverage	Control_ND_4__PG.Coverage	Control_ND_5__PG.Coverage	Control_ND_6__PG.Coverage	Proteinuric_AD_1__PG.Coverage	Proteinuric_AD_2__PG.Coverage	Proteinuric_AD_3__PG.Coverage	Proteinuric_AD_4__PG.Coverage	Proteinuric_AD_5__PG.Coverage	Proteinuric_ND_1__PG.Coverage	Proteinuric_ND_2__PG.Coverage	Proteinuric_ND_3__PG.Coverage	Proteinuric_ND_4__PG.Coverage	Control_AD_1__PG.Pvalue	Control_AD_2__PG.Pvalue	Control_AD_3__PG.Pvalue	Control_AD_4__PG.Pvalue
Kid. Medulla	Col12a1	E9PX70_MOUSE;COCA1_MOUSE	E9PX70;Q60847	73	87	70	88	77	92	93	100	97	99	105	97	95	104	105	98	103	98	99	106	105	32.9%;32.3%	36.1%;35.4%	29.5%;28.9%	36.3%;35.7%	33.8%;33.2%	36.2%;35.5%	37.4%;36.7%	39.5%;38.8%	39.2%;38.5%	40.7%;40%	41.2%;40.5%	38.9%;38.2%	39.3%;38.6%	42.5%;41.7%	42.5%;41.8%	40%;39.3%	42.1%;41.3%	40.2%;39.5%	38.9%;38.2%	42.5%;41.8%	41.6%;40.9%	4.32915e-17	4.32915e-17	4.32915e-17	4.32915e-17
Kid. Medulla	Col13a1	D3Z7B8_MOUSE;D3Z7B9_MOUSE;F6Y6J7_MOUSE;CODA1_MOUSE	D3Z7B8;D3Z7B9;F6Y6J7;Q9R1N9	1	1	1	1			1	1	1	1	1	1		1	1		1	1				1.8%;1.7%;4.9%;1.6%	1.8%;1.7%;4.9%;1.6%	1.8%;1.7%;4.9%;1.6%	1.8%;1.7%;4.9%;1.6%			1.8%;1.7%;4.9%;1.6%	1.8%;1.7%;4.9%;1.6%	1.8%;1.7%;4.9%;1.6%	1.8%;1.7%;4.9%;1.6%	1.8%;1.7%;4.9%;1.6%	1.8%;1.7%;4.9%;1.6%		1.8%;1.7%;4.9%;1.6%	1.8%;1.7%;4.9%;1.6%		1.8%;1.7%;4.9%;1.6%	1.8%;1.7%;4.9%;1.6%				0.00165862	0.00165862	0.00165862	0.00165862
Kid. Medulla	Col14a1	B7ZNH7_MOUSE	B7ZNH7	58	59	51	57	59	60	59	60	59	58	61	60	57	63	61	61	65	65	64	64	64	40.6%	43.4%	37.8%	44.6%	46.4%	47.5%	45.6%	46.2%	42.5%	42.6%	46.4%	46.4%	45.2%	47.7%	48.8%	46.8%	50.1%	49.5%	46.5%	49.3%	47.3%	1.54307e-15	1.54307e-15	1.54307e-15	1.54307e-15
Kid. Medulla	Col15a1	A2AJY2_MOUSE;COFA1_MOUSE	A2AJY2;O35206	15	17	16	18	19	17	19	19	18	19	18	18	19	17	19	17	18	18	19	18	16	14.9%;14.7%	17.1%;16.8%	15.8%;15.6%	18.1%;17.8%	18.7%;18.4%	16.8%;16.5%	19.3%;19%	18.7%;18.4%	17.4%;17.1%	18.7%;18.4%	18.1%;17.8%	18.1%;17.8%	18.7%;18.4%	17.1%;16.8%	18.7%;18.4%	17.1%;16.8%	18.1%;17.8%	18.1%;17.8%	19.3%;19%	18.1%;17.8%	15.8%;15.6%	2.52579e-17	2.52579e-17	2.52579e-17	2.52579e-17
Kid. Medulla	Col16a1	COGA1_MOUSE	Q8BLX7							0		1							1				1	2							0.6%		0.8%							0.6%				0.8%	1.3%
Kid. Medulla	Col18a1	A0A1W2P6N8_MOUSE	A0A1W2P6N8	1	1		1	1	1		1	1	1	1	1		1	1	1		1	1	1	1	10.7%	10.7%		10.7%	10.7%	10.7%		10.7%	10.7%	10.7%	10.7%	10.7%		10.7%	10.7%	10.7%		10.7%	10.7%	10.7%	10.7%	1.68029e-10	1.68029e-10		1.68029e-10
Kid. Medulla	Col18a1	E9QPX1_MOUSE;COIA1_MOUSE	E9QPX1;P39061	28	28	29	27	29	28	28	29	31	28	30	28	28	30	30	29	26	27	28	31	34	18.3%;18.3%	19.6%;19.6%	22.1%;22.1%	20.4%;20.4%	20.4%;20.4%	20.6%;20.6%	21%;21%	21.1%;21.1%	21.2%;21.2%	20.3%;20.3%	21%;21%	19.2%;19.2%	20.7%;20.7%	23.9%;23.9%	21.8%;21.8%	22.1%;22.1%	18.9%;18.9%	20.2%;20.2%	20.2%;20.2%	23.4%;23.4%	24.6%;24.6%	4.60524e-16	4.60524e-16	4.60524e-16	4.60524e-16
Kid. Medulla	Col1a1	CO1A1_MOUSE	P11087	16	18	10	13	13	15	19	25	20	22	24	15	19	16	17	16	20	19	16	15	14	14%	18.4%	8.9%	14.7%	11.6%	13.8%	20.1%	25.6%	19.5%	21.5%	23.5%	14.8%	17%	14.1%	13.4%	16.2%	19.6%	18.2%	14%	13.6%	12.6%	3.86498e-21	3.86498e-21	3.86498e-21	3.86498e-21
Kid. Medulla	Col1a2	CO1A2_MOUSE	Q01149	17	19	17	20	20	19	21	25	23	21	22	24	19	19	19	20	23	20	18	20	23	18.3%	21.1%	18.3%	21.6%	21.1%	21.8%	22.5%	27.4%	24.3%	23.5%	23%	25.7%	20.8%	20%	20.8%	21.8%	25.5%	20.2%	18.2%	19.7%	24.5%	2.49421e-09	2.49421e-09	2.49421e-09	2.49421e-09
Kid. Medulla	Col26a1	COQA1_MOUSE	Q91VF6		1		1	1	1	2	2	2	2	2	1			1			1		1	1		3%		3%	3%	3%	9.3%	9.3%	9.3%	9.3%	4.5%	3%			3%			3%		3%	3%		4.4429e-08		4.4429e-08
Kid. Medulla	Col28a1	A0A1L1SSY2_MOUSE;COSA1_MOUSE	A0A1L1SSY2;Q2UY11		6	1	1	2		2	3	4		3	3	4	5	4	4	5	4	2	1	5		33.8%;6.9%	3%;0.6%	3%;0.6%	8.5%;1.8%		8.1%;1.7%	17.5%;3.6%	25.2%;5.2%		17.9%;3.7%	13.7%;2.8%	23.1%;4.7%	28.6%;5.9%	23.1%;4.7%	25.2%;5.2%	26.5%;5.4%	25.2%;5.2%	12.4%;2.5%	3%;0.6%	30.3%;6.2%		4.25575e-11	4.25575e-11	4.25575e-11
Kid. Medulla	Col3a1	CO3A1_MOUSE	P08121	4	8	4	6	5	10	12	15	9	10	11	8	11	11	5	8	15	8	7	9	12	3.2%	6.1%	4%	4.5%	3.3%	6.4%	8.3%	11%	5.4%	6.6%	6.8%	6%	7.9%	6.6%	4%	7%	9%	5.5%	5.1%	6.4%	7.3%	1.2894e-10	1.2894e-10	1.2894e-10	1.2894e-10
Kid. Medulla	Col4a1	CO4A1_MOUSE	P02463	11	11	9	10	10	9	12	11	12	11	12	11	7	10	7	11	9	9	10	8	13	9.4%	9.4%	8.3%	9.2%	9.4%	8.2%	9.8%	8.9%	10.1%	8.7%	10.1%	9.8%	6.5%	8.1%	6.1%	9.8%	8%	8%	8.9%	7%	10.9%	1.66354e-17	1.66354e-17	1.66354e-17	1.66354e-17
Kid. Medulla	Col4a2	CO4A2_MOUSE	P08122	15	17	18	16	15	16	18	17	17	16	16	16	10	14	14	14	15	16	13	15	16	13.1%	15.1%	15.8%	13.6%	13.6%	14.2%	14.2%	14.2%	14.2%	14.2%	14.1%	13.1%	9%	12.8%	12.4%	12.4%	13.1%	14.2%	11.3%	14.9%	15.1%	4.54118e-12	4.54118e-12	4.54118e-12	4.54118e-12
Kid. Medulla	Col4a3	CO4A3_MOUSE	Q9QZS0	4	3	5	3	2	5	5	6	6	6	5	5	3	4	2	2	2	5	3	6	3	4.9%	3.7%	5.5%	3.7%	1.9%	5.5%	4.9%	5.5%	5.5%	5.5%	5.5%	5.5%	3.1%	4.3%	1.9%	1.9%	1.9%	4.9%	3.7%	5.5%	3.1%	1.01551e-10	1.01551e-10	1.01551e-10	1.01551e-10
Kid. Medulla	Col4a4	CO4A4_MOUSE	Q9QZR9	6	5	5	5	6	4	7	6	6	7	7	7	2	6	3	7	5	4	2	5	4	7%	6.2%	5.2%	6.2%	7%	4.5%	8%	6%	6.4%	8%	8%	7.1%	3%	6%	3.6%	8.1%	5.2%	3.4%	1.8%	5.2%	3.4%	1.52774e-08	1.52774e-08	1.52774e-08	1.52774e-08
Kid. Medulla	Col4a5	F7CK55_MOUSE;Q63ZW6_MOUSE	F7CK55;Q63ZW6	3	3	3	4	4	6	6	6	4	5	4	5	3	5	3	4	3	3	4	4	4	3.9%;1.8%	3.9%;1.8%	3.9%;1.8%	6.2%;3%	5.4%;2.5%	10.2%;4.8%	10.2%;4.8%	10.2%;4.8%	6.4%;3%	7.2%;3.4%	5.4%;2.5%	7.8%;3.7%	3.9%;1.8%	7.9%;3.7%	3.9%;1.8%	6.2%;3%	3.9%;1.8%	3.9%;1.8%	5.4%;2.5%	5.4%;2.5%	5.4%;2.5%	1.69992e-11	1.69992e-11	1.69992e-11	1.69992e-11
Kid. Medulla	Col4a6	B1AVK5_MOUSE	B1AVK5	3	4	3	5	2	4	5	5	5	4	3	3	1	4	1	4	1	2	2	3	2	2.8%	3.5%	2.8%	4.1%	1.3%	3.5%	4.1%	4.1%	4.1%	3.4%	2.8%	2.8%	0.8%	3.4%	0.5%	3.5%	0.5%	1.3%	1.3%	2.7%	2.3%	1.54361e-11	1.54361e-11	1.54361e-11	1.54361e-11
Kid. Medulla	Col5a1	A0A5F8MQ70_MOUSE	A0A5F8MQ70	1		1		1	2		1	2	1	2		1	2	2	1	2	2	2	2	2	3.8%		3.8%		3.8%	11.8%		8%	11.8%	8%	11.8%		3.8%	11.8%	11.8%	3.8%	11.8%	11.8%	11.8%	11.8%	11.8%	0.00101969		0.00101969
Kid. Medulla	Col5a1	CO5A1_MOUSE	O88207	9	11	9	10	8	10	8	12	11	12	12	11	13	12	12	12	13	10	11	11	13	6.6%	9.7%	7.5%	8.1%	6.6%	8.1%	6.1%	10.2%	9.2%	10.3%	10.2%	8.1%	10.2%	10.2%	10.2%	10.2%	10.2%	8.5%	9.7%	9.2%	11.4%	3.34095e-09	3.34095e-09	3.34095e-09	3.34095e-09
Kid. Medulla	Col5a2	CO5A2_MOUSE	Q3U962	3	4	6	5	4	5	4	4	5	5	8	4	4	3	5	6	6	5	4	5	7	2.7%	3.7%	6.8%	4.7%	3.7%	4.7%	3.7%	3.7%	5.7%	4.5%	8.2%	3.7%	3.7%	2.9%	6%	6.7%	6.5%	6%	3.7%	5.7%	7.5%	1.75901e-11	1.75901e-11	1.75901e-11	1.75901e-11
Kid. Medulla	Col5a3	Q9JLI2_MOUSE	Q9JLI2	1	1		1	2	2	1	1	1	1	1	2	2	1	1	1	1	1		1	2	0.6%	0.6%		0.6%	1.4%	1.4%	0.6%	0.6%	0.6%	0.6%	0.6%	1.6%	1.6%	0.6%	0.6%	0.6%	0.6%	0.6%		0.6%	1.3%	3.19227e-11	3.19227e-11		3.19227e-11
Kid. Medulla	Col6a1	CO6A1_MOUSE	Q04857	30	32	26	29	27	31	27	33	33	31	31	28	24	30	30	28	32	27	30	31	35	30.9%	34.6%	29.1%	33.5%	30.7%	35.5%	31%	36%	35.2%	33.6%	34.8%	30%	28.9%	30.3%	35.3%	29.5%	36.2%	30.8%	33.4%	35.7%	38.2%	6.23309e-13	6.23309e-13	6.23309e-13	6.23309e-13
Kid. Medulla	Col6a2	CO6A2_MOUSE	Q02788	21	22	19	21	20	23	23	25	23	22	24	22	21	22	22	25	26	21	25	24	25	23%	25.1%	22.8%	30%	25%	31%	28.5%	29.9%	26.3%	25.2%	29.3%	25.6%	25.1%	28.8%	25.1%	29.6%	32.5%	28.3%	30.4%	29.9%	32.9%	3.23012e-10	3.23012e-10	3.23012e-10	3.23012e-10
Kid. Medulla	Col6a2	D3Z7D5_MOUSE	D3Z7D5	1	1		1	1	1	1	1	1	1			1	1		1	1			1	1	1.2%	1.2%		1.2%	1.2%	1.2%	1.2%	1.2%	1.2%	1.2%			1.2%	1.2%		1.2%	1.2%			1.2%	1.2%	6.04516e-06	6.04516e-06		6.04516e-06
Kid. Medulla	Col6a3	A0A087WS16_MOUSE;J3QQ16_MOUSE	A0A087WS16;J3QQ16					1						1		1		1											0.4%;0.4%						0.4%;0.4%		0.4%;0.4%		0.4%;0.4%
Kid. Medulla	Col6a3	E9PWQ3_MOUSE	E9PWQ3	123	129	111	126	118	120	125	134	132	131	138	127	126	127	130	131	138	131	120	136	133	47%	47.7%	44.2%	48%	46.8%	46.8%	49.5%	50.8%	51%	49.7%	51.4%	48.6%	48.6%	48.2%	49.9%	50.7%	52.1%	51%	46.9%	50.6%	49.8%	7.55718e-17	7.55718e-17	7.55718e-17	7.55718e-17
Kid. Medulla	Col6a4	CO6A4_MOUSE	A2AX52	15	8	5	26	8	22	6	27	19	19	15	13	10	11	12	23	22	11	6	17	25	11.1%	6.1%	3.7%	16.5%	5.1%	14.1%	4.3%	17.5%	13.5%	13.1%	8.8%	7.8%	5.5%	7%	7.8%	14.3%	13.6%	7.4%	4%	10.7%	15.8%	5.43858e-10	5.43858e-10	5.43858e-10	5.43858e-10
Kid. Medulla	Col6a5	A0A140T8W1_MOUSE;CO6A5_MOUSE	A0A140T8W1;A6H584	12	29	8	41	18	12	41	26	29	12	24	42	27	24	34	19	61	29	9	21	19	6.5%;6.5%	15.7%;15.7%	4.7%;4.7%	22.8%;22.8%	9.8%;9.8%	6.5%;6.5%	22.7%;22.7%	13.4%;13.4%	15.1%;15.1%	5.6%;5.6%	12.7%;12.7%	22.6%;22.6%	14.5%;14.5%	13.5%;13.5%	19.6%;19.6%	10%;10%	28.3%;28.3%	14.8%;14.8%	4.9%;4.9%	11.8%;11.8%	10.9%;10.9%	9.16586e-09	9.16586e-09	9.16586e-09	9.16586e-09
Kid. Medulla	Col6a6	E9Q6A6_MOUSE;CO6A6_MOUSE	E9Q6A6;Q8C6K9	16	30	7	33	24	16	35	35	34	25	24	41	19	21	26	23	45	23	6	12	21	11%;11%	20.1%;20.1%	3.8%;3.8%	21.1%;21.1%	16.8%;16.8%	11.3%;11.3%	21.9%;21.9%	22.9%;22.9%	21.6%;21.6%	16%;16%	15.8%;15.8%	27%;27%	11.9%;11.9%	14.5%;14.5%	17.2%;17.2%	15.5%;15.5%	28.2%;28.2%	15.4%;15.4%	3.6%;3.6%	7.7%;7.7%	14.6%;14.6%	1.60391e-09	1.60391e-09	1.60391e-09	1.60391e-09
Kid. Medulla	Col7a1	CO7A1_MOUSE	Q63870	4	15	2	5	4	6	3	18	9	15	10	11	5	6	5	6	7	2	2	8	11	1.4%	7%	0.6%	2.2%	1.5%	2.6%	0.9%	8.3%	4.1%	6.5%	4.4%	4.9%	2.3%	2.3%	2%	2.3%	3.1%	0.5%	0.6%	3.2%	4.8%	4.63297e-07	4.63297e-07	4.63297e-07	4.63297e-07
Kid. Medulla	Col8a1	CO8A1_MOUSE	Q00780		1	2	3		1	4	5	2		3	2	2	2	2	1	3	2	3	3	2		1.7%	3.1%	4.3%		1.7%	7.9%	9.3%	3%		4.3%	3.1%	3.1%	3.1%	3.1%	1.3%	6.7%	3.1%	4.3%	4.3%	3.1%		0.000782256	0.000782256	0.000782256
[truncated: 206 more columns]
